# Supplementary material for: Biocatalytic enantioselective formation and ring-opening of oxetanes
Source: Research Square preprint supplement (doi:10.21203/rs.3.rs-4316588/v1), 2024-05-16
Supplement: Supplementary file 1 [file 6fab56a8ffa5bc955906c50f.pdf]

## Supplementary Information

### Biocatalytic enantioselective formation and ring-opening of oxetanes

Xia Hua<sup>1,2,3</sup>, Yuan-Fei Wang<sup>1,2,3</sup>, Xiao Jin<sup>1,2</sup>, Hong-Yin Yu<sup>1,2</sup>, Hui-Hui Wang<sup>1,2</sup>, Yong-Zheng Chen<sup>1,2</sup>, and Nan-Wei Wan<sup>1,2,\*</sup>

<sup>1</sup>Key Laboratory of Biocatalysis & Chiral Drug Synthesis of Guizhou Province, Generic Drug Research Center of Guizhou Province, Green Pharmaceuticals Engineering Research Center of Guizhou Province, School of Pharmacy, Zunyi Medical University, Zunyi, 563000, China.

<sup>2</sup>Key Laboratory of Basic Pharmacology of Ministry of Education and Joint International Research Laboratory of Ethnomedicine of Ministry of Education, Zunyi Medical University.

<sup>3</sup>These authors contributed equally: Xia Hua, Yuan-Fei Wang.

\*Corresponding author. Email: nanweiwan@zmu.edu.cn.

#### Table of contents

|                                                                      |      |
|----------------------------------------------------------------------|------|
| 1. Materials and methods.....                                        | S1   |
| 2 Supplementary Tables 1-11.....                                     | S10  |
| 3. Supplementary Figures 1-2.....                                    | S21  |
| 4. Chemical synthesis and characterization of racemic compounds..... | S23  |
| 5. Biocatalytic enantioselective formation of oxetanes.....          | S41  |
| 6. Biocatalytic enantioselective ring-opening of oxetanes.....       | S61  |
| 7. Large-scale reactions.....                                        | S81  |
| 8. Biocatalytic cascades.....                                        | S81  |
| 9. Transformations of chiral products.....                           | S82  |
| 10. Copies of NMR spectra.....                                       | S92  |
| 11. Chiral HPLC/GC traces.....                                       | S192 |
| 12. References.....                                                  | S297 |

## 1. Materials and methods

### General.

<sup>1</sup>H-NMR (400 MHz) and <sup>13</sup>C-NMR (100 MHz) were recorded on Agilent Technologies 400 MR. Chemical shifts were reported in parts per million (ppm) relative to residual signals of the solvent. The following abbreviations are used to indicate multiplicity: s = singlet, d = doublet, t = triplet, q = quartet, m = multiplet, dd = double of doublets, td = triple of doublets, tt = triple of triplets, dt = double of triplets, ddd = double of double of doublets. High-resolution mass spectra (HRMS) was recorded by ESI ionization sources. Flash column chromatography was carried out with 200-400 mesh silica gel. Melting point was uncorrected.

Chemicals (*rac*)-**1a**, (*S*)-**1a**, (*rac*)-**1f**, (*rac*)-**1da**, and (*rac*)-**1ea** were obtained from commercial suppliers. Other racemic  $\gamma$ -haloalcohols (*rac*)-**a**, oxetanes (*rac*)-**b**,  $\gamma$ -azidoalcohols (*rac*)-**c**,  $\gamma$ -cyanohydrin (*rac*)-**1d**, and  $\gamma$ -nitroalcohol **1e** were obtained by chemical synthesis. Isopropyl- $\beta$ -D-thiogalactopyranoside (IPTG) and kanamycin sulfate (Kan) were purchased from Solarbio (Beijing, China). PrimeSTAR DNA polymerase and *Dpn* I endonuclease were purchased from Takara. Cells were grown using or terrific broth (TB) medium. Phosphate buffer (PB, KH<sub>2</sub>PO<sub>4</sub>-Na<sub>2</sub>HPO<sub>4</sub>) was used as a buffering system for whole cell biotransformations, unless otherwise specified. Unless otherwise noted, all the other reagents and solvents were purchased from commercial sources and used as such without further purification.

### Safety concerning statements

Organic azides are potentially explosive substances that can decompose with minimal energy input from external sources. When preparing and using organic azides, we consistently adhere to the following equation which accounts for all nitrogen atoms in the organic azide, not just those in the azido group. It is crucial to handle organic azides and sodium azide with care. Moreover, we have implemented strict safety protocols and, fortunately, have never experienced a safety incident with these experiments.

$$\frac{n(C)+n(O)}{n(N)} \geq 3, \text{ n signifies the number of atoms.}$$

### Chromatography.

The enantiomeric excess (e.e.) values of chiral compounds and analytic yields were determined by chiral HPLC or GC analysis. The chiral HPLC was performed on Shimadzu LC-20A, equipped

with Chiralcel AD-H chiral column (4.6 mm $\Phi$   $\times$  250 mmL, particle size 5  $\mu$ m), Chiralcel OJ-H chiral column (4.6 mm $\Phi$   $\times$  250 mmL, particle size 5  $\mu$ m), Chiralpak OB-H chiral column (4.6 mm $\Phi$   $\times$  250 mmL, particle size 5  $\mu$ m), Chiralcel OD-H chiral column (4.6 mm $\Phi$   $\times$  250 mmL, particle size 5  $\mu$ m), Chiralcel OX-3 chiral column (4.6 mm $\Phi$   $\times$  250 mmL, particle size 3  $\mu$ m), Chiralcel IA-3 chiral column (4.6 mm $\Phi$   $\times$  250 mmL, particle size 3  $\mu$ m), Chiralcel IH chiral column (4.6 mm $\Phi$   $\times$  250 mmL, particle size 5  $\mu$ m), Chiralcel IC-3 chiral column (4.6 mm $\Phi$   $\times$  250 mmL, particle size 3  $\mu$ m). Chiral GC analysis was performed on Agilent 7890B gas chromatograph equipped with a flame ionization detector (FID) using Rt-bDEXcst column or CYCLODEX-B column with nitrogen as the carrier gas.

### Preparation and screening of HHDH.

The recombinant *E. coli* (HHDH) strains were constructed to express the corresponding halohydrin dehalogenase (HHDH) genes, which have been preserved in our laboratory<sup>1,2</sup>. All variants described in this paper were cloned and expressed using plasmid pET-28b(+) as the vector and *Escherichia coli* BL21 (DE3) as the host. *E. coli* (HHDH) cells were cultured in TB medium containing 50  $\mu$ g/mL kanamycin at 37 °C until the optical density at 600 nm (OD<sub>600</sub>) reached a range of 0.6-0.8. IPTG was then added to a final concentration of 0.2 mM to induce enzyme expression. The culture was then further incubated at 28 °C for an additional 12-14 h. Recombinant *E. coli* (HHDH) cells expressing the target HHDH were harvested by centrifugation at 8800  $\times g$  for 3 min at 4 °C. The collected cell pellet was resuspended in phosphate buffer (PB, KH<sub>2</sub>PO<sub>4</sub>-Na<sub>2</sub>HPO<sub>4</sub>) to reach the desired cell density for the biotransformation reactions. The model dehalogenation reaction was carried out with 10 mM (*rac*)-**1a** and 10 g dcw/L (about OD<sub>600</sub>= 20) *E. coli* (HHDH) cells in 5 mL PB buffer (50 mM, pH 8.5) at 30 °C for 8 h. The model ring-opening reaction was carried out with 10 mM (*rac*)-**1b**, 10 mM NaN<sub>3</sub> and 10 g dcw/L (about OD<sub>600</sub>= 20) *E. coli* (HHDH) cells in 5 mL PB buffer (50 mM, pH 7.5) at 30 °C for 10 h. After the reactions were completed, the reaction mixtures were extracted using 5 mL of ethyl acetate. The organic phases were separated, dried over anhydrous Na<sub>2</sub>SO<sub>4</sub>, and analyzed by chiral HPLC. Chiral analysis of **1a**: Chiralpak OX-3, *n*-hexane/*i*PrOH = 99/1, flow rate = 0.5 mL/min,  $\lambda$  = 210 nm,  $t_{(S)-1a}$  = 44.8 min,  $t_{(R)-1a}$  = 48.7 min. Chiral analysis of **1b** and **1c**: Chiralpak OX-3, *n*-hexane/*i*PrOH = 97/3, flow rate = 0.7 mL/min,  $\lambda$  = 210 nm,  $t_{(S)-1b}$  = 10.1 min,  $t_{(R)-1b}$  = 11.3 min;  $t_{(S)-1c}$  = 15.3 min,  $t_{(R)-1c}$  = 16.6 min.

### Docking study.

The predicted structure model (AFDB code: AF-N6YXW4-F1) of the wild type HheD8 (HheD8-WT) was obtained from the AlphaFold Protein Structure Database (<https://alphafold.ebi.ac.uk>). Docking studies of (*R*)-**1b** in the active site of enzyme HheG-WT/AF model was carried out using AutoDock 4.0 software<sup>3</sup>. The docking study was performed using “Genetic Algorithm” search parameters and default docking parameters. The possible docking pose with hydrogen bonds between oxetane ring of substrate (*R*)-**1b** and S117-OH, Y130-OH was chosen for further analysis with the PyMOL software<sup>4</sup>. Residues F19, A69, Y168, M124, R127, Q160, N161 and R182 were identified as hot-spots for site saturation mutagenesis study.

### Directed evolution of HheD8.

Mutagenesis and cultivation: Site-saturation mutagenesis experiments were carried out using QuickChange PCR with degenerate codons. The resulting PCR products were purified, digested with *Dpn* I and directly transformed into *E. coli* BL21(DE3) competent cells via the heat-shock method. Single colonies of *E. coli* cells were picked and cultured in 2-mL 96-deep-well plates containing TB-Kan medium (300  $\mu$ L per well, 50  $\mu$ g/mL kanamycin) at 37°C for 5 h. Subsequently, 900  $\mu$ L of TB-Kan medium with IPTG (to achieve a final concentration of 0.2 mM) was added to each well, and the plates were shaken at 28°C and 900 rpm for 12 h. Induced cells were harvested by centrifugation at  $1600 \times g$  for 15 min at 4 °C and subsequently utilized for biotransformation.

Screening for dehalogenation reaction: To resuspend the *E. coli* (HheD8) cells, 500  $\mu$ L of PB buffer (50 mM, pH 8.5) containing 10 mM (*rac*)-**1a** was added. The plates containing the cell and substrate suspensions were shaken at 30 °C and 900 rpm for 8 h. After completion of the incubation, the reaction mixtures were extracted using 700  $\mu$ L of ethyl acetate. The organic phases were separated, dried over anhydrous Na<sub>2</sub>SO<sub>4</sub>, and analyzed by chiral HPLC.

Screening for ring-opening reaction: To resuspend the *E. coli* (HheD8) cells, 500  $\mu$ L of PB buffer (50 mM, pH 7.5) containing 10 mM (*rac*)-**1b** and 10 mM NaN<sub>3</sub> was added. The plates containing the cell and substrate suspensions were shaken at 30 °C and 900 rpm for 10 h. After completion of the incubation, the reaction mixtures were extracted using 700  $\mu$ L of ethyl acetate. The organic phases were separated, dried over anhydrous Na<sub>2</sub>SO<sub>4</sub>, and analyzed by chiral HPLC.

The mutants demonstrating improved catalytic activity and/or enantioselectivity were further verified using 5 mL biotransformation reactions, followed by preservation and gene sequencing



analysis. The reaction conditions were consistent with those described for the earlier enzyme screening reactions.

#### Primers for site saturation mutagenesis

| Mutation site      | Primer    | Primer sequence                            |
|--------------------|-----------|--------------------------------------------|
| <b>F19</b>         | F19-F     | 5'-GGCAGATGCANNKATGGGTCCTGCAC-3'           |
|                    | F19-R     | 5'-CAGGACCCATMNNNTGCATCTGCCTGG-3'          |
| <b>A69</b>         | A69-F     | 5'-CTGGCAATTCCGNNKCCGAGCACACCG-3'          |
|                    | A69-R     | 5'-ACCGGTGTGCTCGGMNNCGGAATTGCC-3'          |
| <b>M124</b> for M2 | M124-M2-F | 5'-CAGCAGCACTGCGTGGTNNKGCACTGCTGAGCAGC-3'  |
|                    | M124-M2-R | 5'-CTGCTCAGCAGTGCMMNNACCACGCAGTGCTGCTGC-3' |
| <b>M124</b> for M5 | M124-M5-F | 5'-CAGCAGCACTGCGTGGTNNKGCACTGGGGAGCAGC-3'  |
|                    | M124-M5-R | 5'-CTGCTCCCCAGTGCMMNNACCACGCAGTGCTGCTGC-3' |
| <b>R127</b>        | R127-F    | 5'-GGTATGGCACTGNNKAGCAGCTATGCAG-3'         |
|                    | R127-R    | 5'-GCTGCATAGCTGCTMNNCAGTGCCATAC-3'         |
| <b>Q160</b>        | Q160-F    | 5'-GGTTAATGCAATTGCCNNKAATTTTGTGAAAACC-3'   |
|                    | Q160-R    | 5'-GGGTTTTCAACAAAATTMNNNGGCAATTGCATTAAC-3' |
| <b>N161</b>        | N161-F    | 5'-GCAATTGCCCAGNNKTTTGTGAAAAC-3'           |
|                    | N161-R    | 5'-GGTTTTCAACAAAMNNCTGGGCAATTG-3'          |
| <b>Y168</b>        | Y168-F    | 5'-TTGAAAACCCGACCNNKTTTCCGCCAG-3'          |
|                    | Y168-R    | 5'-TGAATTCTGGCGGAAAMNNNGGTCGGG-3'          |
| <b>R182</b>        | R182-F    | 5'-CGGCATTTAAGATNNKCTGAAATGGCAGG-3'        |
|                    | R182-R    | 5'-CCTGCCATTTCAGMNNATCTTTAAATGCCGG-3'      |

#### Enzyme expression and purification.

To purify the HheD8-M3 mutant, we introduced a 6×His tag at its *N*-terminus, constructing the recombinant strain designated as *E. coli* (HheD8-M3-His). A single colony from this strain was used to inoculate 100 mL of LB medium supplemented with 50 µg/mL kanamycin. The culture was incubated overnight at 37 °C and 220 rpm. Subsequently, 4 liters of LB medium, also containing 50 µg/mL kanamycin, were inoculated with a 1:100 dilution of the overnight culture. This larger culture was then incubated at 37 °C and 220 rpm until the OD<sub>600</sub> reached approximately 0.8 (3-5 h). To induce the expression of the recombinant protein, IPTG was added to the culture to achieve a final concentration of 0.5 mM, followed by further incubation at 16 °C and 220 rpm for another overnight. The cells were pelleted by centrifugation (8800×g, at 4 °C for 4 min), resuspended in lysis buffer A (25 mM Tris, pH 8.0, 350 mM NaCl), and lysed by sonication. Cell

debris was removed by centrifugation (11000×*g* and 4 °C for 15 min) to obtain a clarified supernatant. The resulting supernatant harboring HheD8-M3 with *N*-terminal 6 × His-tag was subsequently loaded onto a Ni-NTA affinity column (GE Healthcare) that had been pre-equilibrated with buffer A. To remove nonspecifically bound proteins, the column was washed with 20 column volumes of buffer B (25 mM Tris, 350 mM NaCl, 20 mM imidazole, pH 8.0). The bound target protein was then eluted using elution buffer C (25 mM Tris, 300 mM NaCl, 200 mM imidazole, pH 8.0) and the eluate was collected. The fractions were pooled and subsequently concentrated using a 10 kDa ultrafiltration cube (Amicon® Ultra-15, Millipore). The concentrated protein sample was filtered through a 0.2 μm filter and further purified with an anion exchange Q Sepharose column (HiTrap Q HP, GE Healthcare) eluting with buffer D (10 mM Tris, pH 8.0, 500 mM NaCl, 1 mM DTT) at a flow rate of 1 mL/min. Protein-containing fractions were collected and then concentrated to a final concentration of 20 mg/mL, in preparation for the subsequent crystallization experiments.

### **Crystallization and structure determination.**

The crystallization experiment for HheD8-M3 was conducted at 18 °C using 96-well sitting-drop vapor diffusion plates in combination with commercial crystallization screen kits. In general, each drop was set up with 100 nL of the protein sample at a concentration of either 10 or 20 mg/mL, mixed with 100 nL of crystallization reagent, and the mixture was then equilibrated against 100 μL of reservoir solution. Crystals of HheD8-M3 were successfully grown in conditions containing 1.8 M ammonium sulfate. The crystals were rapidly soaked in the reservoir solution containing 20% (v/v) glycerol as cryo-protectant, mounted on loops, and flash-cooled at 100 K in a nitrogen gas cryo-stream. Crystal diffraction data were collected from a single crystal at the Shanghai Synchrotron Radiation Facility (SSRF, Shanghai, China) in BL02U beamline with a wavelength of 0.9791 Å at 100 K. The diffraction data obtained from the HheD8-M3 crystals were processed and scaled using the X-ray Diffraction Software (XDS) <sup>5</sup>. The structure of HheD8-M3 was then solved by the molecular replacement method using the predicted HheD8 structure (with an accession number AF-N6YXW4-F1 from the AlphaFold Protein Structure Database, <https://alphafold.ebi.ac.uk>) as the initial search model <sup>6</sup>. The initial model was built using PHENIX autobuild <sup>7</sup>, and manual adjustment of the model was carried out using the program COOT <sup>8</sup>. Afterward, the models were refined by PHENIX refinement <sup>7</sup> and Refmac5 <sup>9</sup>. Finally, the

stereochemical quality of the refined structure was checked using <sup>10</sup>. The final validation of the HheD8-M3/Cl<sup>-</sup> crystal structure was performed with Protein Data Bank ADIT Servers. The Ramachandran plot for HheD8-M3/Cl<sup>-</sup> showed 95.51% of residues to be situated in the most favoured regions, 4.09% in additional allowed and 0.00% residues in outlier regions. Diffraction data and coordinates were deposited in the Protein Data Bank (PDB) with the accession number 8XXB (2.40 Å). All crystallographic figures were prepared using the PyMOL molecular graphics software package (Schrodinger, LLC)<sup>11</sup>.

### Gene and protein sequences of HheD8 enzymes.

#### >HheD8-WT (gene sequence)

```
ATGGCCCATGCAATTAGCCTGAGCGGTCGTCGTGTTCTGGTTACCCAGGCAGATGCATTTAT
GGGTCTGCACTGTGTGATGCATTTTCGTGCAGCCGGTGCAGAAAGTTGTTCCGGATCGTAGCG
CACTGCTGGAACGTGGTGCAGGTTCGTGCAGTTATTGAAGCAGCAGGTTCGTATTGATGTTCTG
GTGCTGAATCTGGCAATTCCGGCACCCGAGCACACCGGTTTCATCAGGTTAGCGGTGGTGAATG
GGAAACCACCTTTGCAGCACTGGTTCATCCGATGCGTGAAATGGTTGCAGCAGTTCTGCCGC
AGATGATTGAACGTAAAGCAGGTAAAATTCTGCTGATGGGTAGCGCAGCAGCACTGCGTGG
TATGGCACTGCGTAGCAGCTATGCAGCAGCCCGTGGTGCACAGCTGGCATATATTCAGGCAG
TTGGTGTGTAAGCCGCAGCACATGGTGTTCAGGTTAATGCAATTGCCCAGAATTTTGTGAA
AACCCGACCTATTTTCCGCCAGAAGTTCAGGCAACACCGGCATTTAAAGATCGTCTGAAATG
GCAGGTTCCGCTGGGTCTGTTACAGCAGATGAAGATGCGAGCTTTGCAGTTTATCTGT
GTAGCGAAGCAGCCAATTGTTTTGTTGGTCAGGTTTTTCCGGTTTGTGGTGGTTGGGTTAATC
GTAA
```

#### >HheD8-WT (protein sequence)

```
MAHAISLSGRRVLVTQADAFMGPALCDAFRAAGAEVVPDRSALLERGAGRAVIEAAGRIDVLV
LNLAIPAPSTPVHQVSGGEWETTFAALVHPMREMVA AVL PQMIERKAGKILLMGSAALRGMA
LRSSYAAARGAQLAYIQAVGVEAAAHGVQVNAIAQNFVENPTYFPPEVQATPAFKDRLKWQVP
LGRLVTADEDAFAVYLCSEANCFVGVQVFPVCGGWVNR
```

#### >HheD8-M1 (gene sequence)

```
ATGGCCCATGCAATTAGCCTGAGCGGTCGTCGTGTTCTGGTTACCCAGGCAGATGCATTTAT
GGGTCTGCACTGTGTGATGCATTTTCGTGCAGCCGGTGCAGAAAGTTGTTCCGGATCGTAGCG
CACTGCTGGAACGTGGTGCAGGTTCGTGCAGTTATTGAAGCAGCAGGTTCGTATTGATGTTCTG
GTGCTGAATCTGGCAATTCCGTTCCGAGCACACCGGTTTCATCAGGTTAGCGGTGGTGAATG
GGAAACCACCTTTGCAGCACTGGTTCATCCGATGCGTGAAATGGTTGCAGCAGTTCTGCCGC
AGATGATTGAACGTAAAGCAGGTAAAATTCTGCTGATGGGTAGCGCAGCAGCACTGCGTGG
TATGGCACTGCGTAGCAGCTATGCAGCAGCCCGTGGTGCACAGCTGGCATATATTCAGGCAG
TTGGTGTGTAAGCCGCAGCACATGGTGTTCAGGTTAATGCAATTGCCCAGAATTTTGTGAA
AACCCGACCTATTTTCCGCCAGAAGTTCAGGCAACACCGGCATTTAAAGATCGTCTGAAATG
GCAGGTTCCGCTGGGTCTGTTACAGCAGATGAAGATGCGAGCTTTGCAGTTTATCTGT
GTAGCGAAGCAGCCAATTGTTTTGTTGGTCAGGTTTTTCCGGTTTGTGGTGGTTGGGTTAATC
GTAA
```

#### >HheD8-M1 (protein sequence)

```
MAHAISLSGRRVLVTQADAFMGPALCDAFRAAGAEVVPDRSALLERGAGRAVIEAAGRIDVLV
LNLAIPFPSTPVHQVSGGEWETTFAALVHPMREMVA AVL PQMIERKAGKILLMGSAALRGMA
```

LRSSYAAARGAQLAYIQAVGVEAAAHGVQVNAIAQNFVENPTYFPPEVQATPAFKDRLKWQVP  
LGRLVTADEDASFAVYLCSEAANCFVGQVFPVCGGWVNR

**>HheD8-M2 (gene sequence)**

ATGGCCCATGCAATTAGCCTGAGCGGTCGTCGTGTTCTGGTTACCCAGGCAGATGCATTTAT  
GGGTCCTGCACTGTGTGATGCATTTTCGTGCAGCCGGTGCAGAAGTTGTTCCGGATCGTAGCG  
CACTGCTGGAACGTGGTGCAGGTCGTGCAGTTATTGAAGCAGCAGGTCGTATTGATGTTCTG  
GTGCTGAATCTGGCAATTCCGTTCCGAGCACACCGGTTTCATCAGGTTAGCGGTGGTGAATG  
GGAAACCACCTTTGCAGCACTGGTTCATCCGATGCGTGAAATGGTTGCAGCAGTTCTGCCGC  
AGATGATTGAACGTAAAGCAGGTAAAATTCTGCTGATGGGTAGCGCAGCAGCACTGCGTGG  
TATGGCACTGGGGAGCAGCTATGCAGCAGCCCGTGGTGCACAGCTGGCATATATTCAGGC  
AGTTGGTGTGTAAGCCGCAGCACATGGTGTTCAGGTAAATGCAATTGCCCAGAATTTTGTG  
AAAACCCGACCTATTTTCCGCCAGAAGTTCAGGCAACACCGGCATTTAAAGATCGTCTGAAA  
TGGCAGGTTCCGCTGGGTCGTCTGGTTACAGCAGATGAAGATGCGAGCTTTGCAGTTTATCT  
GTGTAGCGAAGCAGCCAATTGTTTTGTTGGTCAGGTTTTTCCGGTTTGTGGTGGTTGGGTAA  
TCGTAA

**>HheD8-M2 (protein sequence)**

MAHAISLSGRRVLVTQADAFMGPALCDAFRAAGAEVVPDRSALLERGAGRAVIEAAGRIDVLV  
LNLAIPFPSTPVHQVSGGEWETFAALVHPMREMVAAVLPQMIERKAGKILLMGSAAALRGMA  
LGSYAAARGAQLAYIQAVGVEAAAHGVQVNAIAQNFVENPTYFPPEVQATPAFKDRLKWQVP  
LGRLVTADEDASFAVYLCSEAANCFVGQVFPVCGGWVNR

**>HheD8-M3 (gene sequence)**

ATGGCCCATGCAATTAGCCTGAGCGGTCGTCGTGTTCTGGTTACCCAGGCAGATGCATTTAT  
GGGTCCTGCACTGTGTGATGCATTTTCGTGCAGCCGGTGCAGAAGTTGTTCCGGATCGTAGCG  
CACTGCTGGAACGTGGTGCAGGTCGTGCAGTTATTGAAGCAGCAGGTCGTATTGATGTTCTG  
GTGCTGAATCTGGCAATTCCGTTCCGAGCACACCGGTTTCATCAGGTTAGCGGTGGTGAATG  
GGAAACCACCTTTGCAGCACTGGTTCATCCGATGCGTGAAATGGTTGCAGCAGTTCTGCCGC  
AGATGATTGAACGTAAAGCAGGTAAAATTCTGCTGATGGGTAGCGCAGCAGCACTGCGTGG  
TCCGGCACTGGGGAGCAGCTATGCAGCAGCCCGTGGTGCACAGCTGGCATATATTCAGGC  
AGTTGGTGTGTAAGCCGCAGCACATGGTGTTCAGGTAAATGCAATTGCCCAGAATTTTGTG  
AAAACCCGACCTATTTTCCGCCAGAAGTTCAGGCAACACCGGCATTTAAAGATCGTCTGAAA  
TGGCAGGTTCCGCTGGGTCGTCTGGTTACAGCAGATGAAGATGCGAGCTTTGCAGTTTATCT  
GTGTAGCGAAGCAGCCAATTGTTTTGTTGGTCAGGTTTTTCCGGTTTGTGGTGGTTGGGTAA  
TCGTAA

**>HheD8-M3 (protein sequence)**

MAHAISLSGRRVLVTQADAFMGPALCDAFRAAGAEVVPDRSALLERGAGRAVIEAAGRIDVLV  
LNLAIPFPSTPVHQVSGGEWETFAALVHPMREMVAAVLPQMIERKAGKILLMGSAAALRGPAL  
GSSYAAARGAQLAYIQAVGVEAAAHGVQVNAIAQNFVENPTYFPPEVQATPAFKDRLKWQVPL  
GRLVTADEDASFAVYLCSEAANCFVGQVFPVCGGWVNR

**>HheD8-M4 (gene sequence)**

ATGGCCCATGCAATTAGCCTGAGCGGTCGTCGTGTTCTGGTTACCCAGGCAGATGCATTTAT  
GGGTCCTGCACTGTGTGATGCATTTTCGTGCAGCCGGTGCAGAAGTTGTTCCGGATCGTAGCG  
CACTGCTGGAACGTGGTGCAGGTCGTGCAGTTATTGAAGCAGCAGGTCGTATTGATGTTCTG  
GTGCTGAATCTGGCAATTCCGTTCCGAGCACACCGGTTTCATCAGGTTAGCGGTGGTGAATG  
GGAAACCACCTTTGCAGCACTGGTTCATCCGATGCGTGAAATGGTTGCAGCAGTTCTGCCGC  
AGATGATTGAACGTAAAGCAGGTAAAATTCTGCTGATGGGTAGCGCAGCAGCACTGCGTGG  
TCCGGCACTGGGGAGCAGCTATGCAGCAGCCCGTGGTGCACAGCTGGCATATATTCAGGC  
AGTTGGTGTGTAAGCCGCAGCACATGGTGTTCAGGTAAATGCAATTGCCCAGAATTTTGTG  
AAAACCCGACCTATTTTCCGCCAGAAGTTCAGGCAACACCGGCATTTAAAGATTGGCTGAAA

TGGCAGGTTCCGCTGGGTCGTCTGGTTACAGCAGATGAAGATGCGAGCTTTGCAGTTTATCT  
GTGTAGCGAAGCAGCCAATTGTTTTGTTGGTCAGGTTTTTCCGGTTTGTGGTGGTTGGGTAA  
TCGTAA

**>HheD8-M4 (protein sequence)**

MAHAISLSGRRVLVTQADAFMGPALCDAFRAAGAEVVPDRSALLERGAGRAVIEAAGRIDVLV  
LNLAIPFPSTPVHQVSGGEWETTFALVHPMREMVA AVL PQMIERKAGKILLMGSAAALRG PAL  
GSSYAAARGAQLAYIQAVGVEAAAHGVQVNAIAQNFVENPTYFPPEVQATPAFKD WLKWQVP  
LGR LVT ADE DASFAYVLCSEAANCFVGQVFPVCGGWVNR

**>HheD8-M5 (gene sequence)**

ATGGCCCATGCAATTAGCCTGAGCGGTCGTCGTGTTCTGGTTACCCAGGCAGATGCATTTAT  
GGGTCTGCACTGTGTGATGCATTTTCGTGCAGCCGGTGCAGAAAGTTGTTCCGGATCGTAGCG  
CACTGCTGGAACGTGGTGCAGGTTCGTGCAGTTATTGAAGCAGCAGGTTCGTATTGATGTTCTG  
GTGCTGAATCTGGCAATTCGGTTCCGAGCACACCGGTTTCATCAGGTTAGCGGTGGTGAATG  
GGAAACCACCTTTGCAGCACTGGTTTCATCCGATGCGTGAAATGGTTGCAGCAGTTCTGCCGC  
AGATGATTGAACGTAAAGCAGGTAAAATTCTGCTGATGGGTAGCGCAGCAGCACTGCGTGG  
TATGGCACTGTGTGAGCAGCTATGCAGCAGCCCGTGGTGCACAGCTGGCATATATTCAGGCA  
GTTGGTGTGTAAGCCGCAGCACATGGTGTTCAGGTTAATGCAATTGCCCAGAATTTTGTGTA  
AAACCCGACCTATTTTCCGCCAGAAGTTCAGGCAACACCGGCATTTAAAGATCGTCTGAAAT  
GGCAGGTTCCGCTGGGTCGTCTGGTTACAGCAGATGAAGATGCGAGCTTTGCAGTTTATCTG  
TG TAGCGAAGCAGCCAATTGTTTTGTTGGTCAGGTTTTTCCGGTTTGTGGTGGTTGGGTAAAT  
CGTAA

**>HheD8-M5 (protein sequence)**

MAHAISLSGRRVLVTQADAFMGPALCDAFRAAGAEVVPDRSALLERGAGRAVIEAAGRIDVLV  
LNLAIPFPSTPVHQVSGGEWETTFALVHPMREMVA AVL PQMIERKAGKILLMGSAAALRGMA  
LLSSYAAARGAQLAYIQAVGVEAAAHGVQVNAIAQNFVENPTYFPPEVQATPAFKDRLKWQVP  
LGR LVT ADE DASFAYVLCSEAANCFVGQVFPVCGGWVNR

**>HheD8-M6 (gene sequence)**

ATGGCCCATGCAATTAGCCTGAGCGGTCGTCGTGTTCTGGTTACCCAGGCAGATGCATTTAT  
GGGTCTGCACTGTGTGATGCATTTTCGTGCAGCCGGTGCAGAAAGTTGTTCCGGATCGTAGCG  
CACTGCTGGAACGTGGTGCAGGTTCGTGCAGTTATTGAAGCAGCAGGTTCGTATTGATGTTCTG  
GTGCTGAATCTGGCAATTCGGTTCCGAGCACACCGGTTTCATCAGGTTAGCGGTGGTGAATG  
GGAAACCACCTTTGCAGCACTGGTTTCATCCGATGCGTGAAATGGTTGCAGCAGTTCTGCCGC  
AGATGATTGAACGTAAAGCAGGTAAAATTCTGCTGATGGGTAGCGCAGCAGCACTGCGTGG  
TCCGGCACTGTGTGAGCAGCTATGCAGCAGCCCGTGGTGCACAGCTGGCATATATTCAGGCA  
GTTGGTGTGTAAGCCGCAGCACATGGTGTTCAGGTTAATGCAATTGCCCAGAATTTTGTGTA  
AAACCCGACCTATTTTCCGCCAGAAGTTCAGGCAACACCGGCATTTAAAGATCGTCTGAAAT  
GGCAGGTTCCGCTGGGTCGTCTGGTTACAGCAGATGAAGATGCGAGCTTTGCAGTTTATCTG  
TG TAGCGAAGCAGCCAATTGTTTTGTTGGTCAGGTTTTTCCGGTTTGTGGTGGTTGGGTAAAT  
CGTAA

**>HheD8-M6 (protein sequence)**

MAHAISLSGRRVLVTQADAFMGPALCDAFRAAGAEVVPDRSALLERGAGRAVIEAAGRIDVLV  
LNLAIPFPSTPVHQVSGGEWETTFALVHPMREMVA AVL PQMIERKAGKILLMGSAAALRG PAL  
LSSYAAARGAQLAYIQAVGVEAAAHGVQVNAIAQNFVENPTYFPPEVQATPAFKDRLKWQVPL  
GR LVT ADE DASFAYVLCSEAANCFVGQVFPVCGGWVNR

**>HheD8-M7 (gene sequence)**

ATGGCCCATGCAATTAGCCTGAGCGGTCGTCGTGTTCTGGTTACCCAGGCAGATGCATTTAT  
GGGTCTGCACTGTGTGATGCATTTTCGTGCAGCCGGTGCAGAAAGTTGTTCCGGATCGTAGCG  
CACTGCTGGAACGTGGTGCAGGTTCGTGCAGTTATTGAAGCAGCAGGTTCGTATTGATGTTCTG

GTGCTGAATCTGGCAATTCCGTTTCCGAGCACACCGGTTTCATCAGGTTAGCGGTGGTGAATG  
GGAAACCACCTTTGCAGCACTGGTTCATCCGATGCGTGAAATGGTTGCAGCAGTTCTGCCGC  
AGATGATTGAACGTAAAGCAGGTAAAATTCTGCTGATGGGTAGCGCAGCAGCACTGCGTGG  
TCCGGCACTGTTGAGCAGCTATGCAGCAGCCCGTGGTGCACAGCTGGCATATATTCAGGCA  
GTTGGTGTGAAGCCGCAGCACATGGTGTTCAGGTTAATGCAATTGCCCAGAATTTTGTGTA  
AAACCCGACCTATTTTCCGCCAGAAGTTCAGGCAACACCGGCATTTAAGATTTGGCTGAAAT  
GGCAGGTTCCGCTGGGTCGTCTGGTTACAGCAGATGAAGATGCGAGCTTTGCAGTTTATCTG  
TGTAAGCAAGCAGCCAATTGTTTTGTTGGTCAGGTTTTTCCGGTTTGTGGTGGTTGGGTTAAT  
CGTTAA

**>HheD8-M7 (protein sequence)**

MAHAISLSGRRVLVTQADAFMGPALCDAFRAAGAEVVPDRSALLERGAGRAVIEAAGRIDVLV  
LNLAIPFPSTPVHQVSGGEWETTFALVHPMREMVA AVLPMIERKAGKILLMGSAAALRGPAL  
LSSYAAARGAQLAYIQAVGVEAAAHGVQVNAIAQNFVENPTYFPPEVQATPAFKDWLKWQVPL  
GRLVTADEDAFVYLCSEAANCFVGQVFPVCGGWVNR

**>HheD8-M3+N-His-tag (gene sequence)**

ATGGCCCATCATCATCATCACGCAATTAGCCTGAGCGGTCGTCGTGTTCTGGTTACCCA  
GGCAGATGCATTTATGGGTCCTGCACTGTGTGATGCATTTTCGTGCAGCCGGTGCAGAAGTTG  
TTCCGGATCGTAGCGCACTGCTGGAACGTGGTGCAGGTCGTGCAGTTATTGAAGCAGCAGGT  
CGTATTGATGTTCTGGTGCTGAATCTGGCAATTCCGTTTCCGAGCACACCGGTTTCATCAGGTT  
AGCGGTGGTGAATGGGAAACCACCTTTGCAGCACTGGTTCATCCGATGCGTGAAATGGTTGC  
AGCAGTTCTGCCGCAGATGATTGAACGTAAAGCAGGTAAAATTCTGCTGATGGGTAGCGCA  
GCAGCACTGCGTGGTCCGGCACTGTTGAGCAGCTATGCAGCAGCCCGTGGTGCACAGCTG  
GCATATATTCAGGCAGTTGGTGTGAAGCCGCAGCACATGGTGTTCAGGTTAATGCAATTGC  
CCAGAATTTTGTGAAAACCCGACCTATTTTCCGCCAGAAGTTCAGGCAACACCGGCATTTA  
AAGATCGTCTGAAATGGCAGGTTCCGCTGGGTCGTCTGGTTACAGCAGATGAAGATGCGAG  
CTTTGCAGTTTATCTGTGTAGCGAAGCAGCCAATTGTTTTGTTGGTCAGGTTTTTCCGGTTTG  
TGGTGGTTGGGTTAATCGTTAA

**>HheD8-M3+ N-His-tag (protein sequence)**

MAHHHHHAISLSGRRVLVTQADAFMGPALCDAFRAAGAEVVPDRSALLERGAGRAVIEAAGR  
IDVLVLNLAIPFPSTPVHQVSGGEWETTFALVHPMREMVA AVLPMIERKAGKILLMGSAAAL  
RGPALGSSYAAARGAQLAYIQAVGVEAAAHGVQVNAIAQNFVENPTYFPPEVQATPAFKDRLK  
WQVPLGRLVTADEDAFVYLCSEAANCFVGQVFPVCGGWVNR

## 2. Supplementary Tables 1-11

**Supplementary Table 1. Recombinant *E. coli* (HHDH) strains used in this study.**

| HHDHs   | Source                                                          | Accession      | Identified in Ref. |
|---------|-----------------------------------------------------------------|----------------|--------------------|
| HheA2   | <i>Arthrobacter</i> sp. AD2                                     | AAK92100       | 12                 |
| HheA5   | <i>Tistrella mobilis</i> KA081020-065                           | WP_014743557   | 13                 |
| HheA8   | alpha proteobacterium Mf 1.05b.01                               | WP_051402546   | 14                 |
| HheA10  | <i>Tsukamurella</i> sp. 1534                                    | WP_019201195   | 14                 |
| HheA11  | <i>Reyranella massiliensis</i> 521                              | WP_020698933   | 14                 |
| HheA13  | <i>Pseudomonas</i> sp. G5(2012)                                 | WP_042955870   | 14                 |
| HheB3   | marine metagenome                                               | EBL02020       | 13                 |
| HheB4   | marine metagenome                                               | EBP61646       | 13                 |
| HheB6   | marine metagenome                                               | EDB56284       | 13                 |
| HheC    | <i>Agrobacterium tumefaciens</i> AD1                            | AAK92099       | 12                 |
| HheD    | <i>Dechloromonas aromatica</i> RCB                              | WP_011285856   | 13                 |
| HheD2   | gamma proteobacterium HTCC2207                                  | WP_007233072   | 13                 |
| HheD6   | <i>Marinobacter nanhaiticus</i> D15-8W                          | WP_004579485   | 14                 |
| HheD7   | <i>Thauera</i> sp. 27                                           | WP_002926105   | 14                 |
| HheD8   | <i>Thauera aminoaromatica</i> S2                                | WP_004302136   | 14                 |
| HheD14  | <i>Gammaproteobacteria</i> bacterium MOLA455                    | WP_035490777   | 14                 |
| HheD15  | <i>Candidatus Competibacter denitrificans</i> Run_A_D11         | WP_048670059   | 14                 |
| HheD16  | <i>Methylibium</i> sp. T29                                      | WP_036236554   | 14                 |
| HheE    | marine metagenome                                               | EBP63112       | 13                 |
| HheE5   | marine metagenome                                               | WP_009577001   | 13                 |
| HheF    | uncultured bacterium                                            | BAH89601       | 13                 |
| HheG    | <i>Ilumatobacter coccineus</i> YM16-304                         | WP_015443096   | 13                 |
| HheG2   | <i>Ilumatobacter nonamiensis</i> YM16-303                       | WP_040495182   | 14                 |
| HHDHn1  | <i>Rhodobiaceae</i> bacterium                                   | PCJ71437.1     | 15                 |
| HHDHn2  | <i>Alphaproteobacteria</i> bacterium HGW-Alphaproteobacteria-3  | YJ5359PY013    | 15                 |
| HHDHn3  | <i>Alphaproteobacteria</i> bacterium 46_93_T64                  | OUR79898       | 15                 |
| HHDHn4  | <i>Reyranella massiliensis</i>                                  | WP_020698933.1 | 15                 |
| HHDHn5  | <i>Alphaproteobacteria</i> bacterium 65-37                      | OJU34764.1     | 15                 |
| HHDHn6  | <i>Rhodospirillales</i> bacterium URHD0017                      | WP_092824593.1 | 15                 |
| HHDHn7  | <i>Alphaproteobacteria</i> bacterium RIFCSPHIGHO2_12_FULL_66_14 | OFW98094.1     | 15                 |
| HHDHn8  | <i>Enhydrobacter aerosaccus</i>                                 | WP_085934632.1 | 15                 |
| HHDHn9  | <i>Rhodospirillaceae</i> bacterium TMED8                        | OUT52242.1     | 15                 |
| HHDHn10 | <i>Rhodomicrobium</i>                                           | WP_088343515.1 | 15                 |
| HHDHn11 | <i>Aurantiochytrium</i> sp. FCC1311                             | GBG24028.1     | 15                 |
| HHDHamb | <i>Acidimicrobiia</i> bacterium                                 | MSO17354.1     | 16                 |
| HHDHapb | <i>Alphaproteobacteria</i> bacterium 32-64-14                   | OYX46376.1     | 16                 |
| HHDHabb | <i>Actinobacteria</i> bacterium IMCC26256                       | AKL74579.1     | 16                 |
| HHDHnsr | <i>Novosphingobium resinovorum</i>                              | WP_069709913.1 | 16                 |

**Supplementary Table 2. Screening of HDDHs for the dehalogenation reaction of (*rac*)-**1a**.<sup>a</sup>**

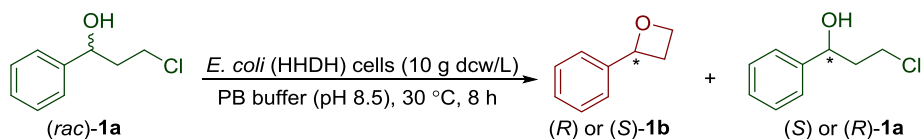

| entry | biocatalyst               | yield <b>1b</b> (%) <sup>b</sup> | e.e. <b>1b</b> (%) <sup>b</sup> | e.e. <b>1a</b> (%) <sup>b</sup> | <i>E</i> <sup>c</sup> |
|-------|---------------------------|----------------------------------|---------------------------------|---------------------------------|-----------------------|
| 1     | -                         | NR                               | ND                              | <5                              | ND                    |
| 2     | <i>E. coli</i>            | NR                               | ND                              | <5                              | ND                    |
| 3     | <i>E. coli</i> (HheA2)    | NR                               | ND                              | <5                              | ND                    |
| 4     | <i>E. coli</i> (HheA5)    | 13                               | 97 ( <i>R</i> )                 | 15 ( <i>S</i> )                 | 76                    |
| 5     | <i>E. coli</i> (HheA8)    | trace                            | >99 ( <i>R</i> )                | <5                              | ND                    |
| 6     | <i>E. coli</i> (HheA10)   | NR                               | ND                              | <5                              | ND                    |
| 7     | <i>E. coli</i> (HheA11)   | NR                               | ND                              | <5                              | ND                    |
| 8     | <i>E. coli</i> (HheA13)   | NR                               | ND                              | <5                              | ND                    |
| 9     | <i>E. coli</i> (HheB3)    | trace                            | >99 ( <i>R</i> )                | <5                              | ND                    |
| 10    | <i>E. coli</i> (HheB4)    | trace                            | >99 ( <i>R</i> )                | <5                              | ND                    |
| 11    | <i>E. coli</i> (HheB6)    | 8                                | 89 ( <i>R</i> )                 | 8 ( <i>S</i> )                  | 18                    |
| 12    | <i>E. coli</i> (HheC)     | 26                               | 86 ( <i>S</i> )                 | 38 ( <i>R</i> )                 | 19                    |
| 13    | <i>E. coli</i> (HheD)     | 6                                | 35 ( <i>R</i> )                 | <5                              | ND                    |
| 14    | <i>E. coli</i> (HheD2)    | 16                               | 33 ( <i>R</i> )                 | 7 ( <i>S</i> )                  | 2                     |
| 15    | <i>E. coli</i> (HheD6)    | 28                               | 38 ( <i>R</i> )                 | 17 ( <i>S</i> )                 | 3                     |
| 16    | <i>E. coli</i> (HheD7)    | 5                                | 14 ( <i>S</i> )                 | <5                              | ND                    |
| 17    | <i>E. coli</i> (HheD8)    | 18                               | 83 ( <i>R</i> )                 | 21 ( <i>S</i> )                 | 13                    |
| 18    | <i>E. coli</i> (HheD14)   | 13                               | 31 ( <i>R</i> )                 | <5                              | ND                    |
| 19    | <i>E. coli</i> (HheD15)   | 28                               | 30 ( <i>R</i> )                 | 13 ( <i>S</i> )                 | 2                     |
| 20    | <i>E. coli</i> (HheD16)   | 28                               | 53 ( <i>R</i> )                 | 23 ( <i>S</i> )                 | 4                     |
| 21    | <i>E. coli</i> (HheE)     | trace                            | 90 ( <i>R</i> )                 | <5                              | ND                    |
| 22    | <i>E. coli</i> (HheE5)    | 5                                | 86 ( <i>R</i> )                 | <5                              | ND                    |
| 23    | <i>E. coli</i> (HheF)     | NR                               | ND                              | <5                              | ND                    |
| 24    | <i>E. coli</i> (HheG)     | NR                               | ND                              | <5                              | ND                    |
| 25    | <i>E. coli</i> (HheG2)    | NR                               | ND                              | <5                              | ND                    |
| 26    | <i>E. coli</i> (HDDHn1)   | trace                            | 98 ( <i>R</i> )                 | <5                              | ND                    |
| 27    | <i>E. coli</i> (HDDHn2)   | NR                               | ND                              | <5                              | ND                    |
| 28    | <i>E. coli</i> (HDDHn3)   | trace                            | 44 ( <i>R</i> )                 | <5                              | ND                    |
| 29    | <i>E. coli</i> (HDDHn4)   | trace                            | 89 ( <i>R</i> )                 | <5                              | ND                    |
| 30    | <i>E. coli</i> (HDDHn5)   | trace                            | 78 ( <i>R</i> )                 | <5                              | ND                    |
| 31    | <i>E. coli</i> (HDDHn6)   | trace                            | 55 ( <i>R</i> )                 | <5                              | ND                    |
| 32    | <i>E. coli</i> (HDDHn7)   | trace                            | 92 ( <i>R</i> )                 | <5                              | ND                    |
| 33    | <i>E. coli</i> (HDDHn8)   | trace                            | 93 ( <i>R</i> )                 | <5                              | ND                    |
| 34    | <i>E. coli</i> (HDDHn9)   | NR                               | ND                              | <5                              | ND                    |
| 35    | <i>E. coli</i> (HDDHn10)  | NR                               | ND                              | <5                              | ND                    |
| 36    | <i>E. coli</i> (HDDHn11)  | NR                               | ND                              | <5                              | ND                    |
| 37    | <i>E. coli</i> ((HDDHamb) | NR                               | ND                              | <5                              | ND                    |
| 38    | <i>E. coli</i> (HDDHapb)  | 7                                | 68 ( <i>R</i> )                 | <5                              | ND                    |
| 39    | <i>E. coli</i> (HDDHabb)  | NR                               | ND                              | <5                              | ND                    |
| 40    | <i>E. coli</i> (HDDHnsr)  | NR                               | ND                              | <5                              | ND                    |

<sup>a</sup>The reactions were carried out in triplicate with 10 mM (*rac*)-**1a** and 10 g dcw/L *E. coli* (HDDH) cells in 5 mL PB buffer (50 mM, pH 8.5) at 30 °C for 8 h. <sup>b</sup>The yields and e.e. values were determined by chiral HPLC. <sup>c</sup>Calculated enantioselectivity:  $E = \ln[(1-ee_{1a})/(1+ee_{1a}/ee_{1b})]/\ln[(1+ee_{1a})/(1+ee_{1a}/ee_{1b})]$ . NR= no reaction. ND= not detected.



**Supplementary Table 3. Screening of HDDHs for the ring-opening reaction of (*rac*)-**1b**.**

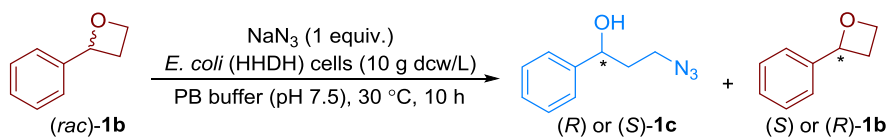

| entry | biocatalyst              | yield <b>1c</b> (%) <sup>b</sup> | e.e. <b>1c</b> (%) <sup>b</sup> | e.e. <b>1b</b> (%) <sup>b</sup> | <i>E</i> <sup>c</sup> |
|-------|--------------------------|----------------------------------|---------------------------------|---------------------------------|-----------------------|
| 1     | -                        | NR                               | ND                              | <5                              | ND                    |
| 2     | <i>E. coli</i>           | NR                               | ND                              | <5                              | ND                    |
| 3     | <i>E. coli</i> (HheA5)   | trace                            | <5                              | <5                              | ND                    |
| 4     | <i>E. coli</i> (HheA8)   | trace                            | 25 ( <i>R</i> )                 | <5                              | ND                    |
| 5     | <i>E. coli</i> (HheB3)   | trace                            | 55 ( <i>R</i> )                 | <5                              | ND                    |
| 6     | <i>E. coli</i> (HheB4)   | trace                            | 57 ( <i>R</i> )                 | <5                              | ND                    |
| 7     | <i>E. coli</i> (HheB6)   | trace                            | 56 ( <i>R</i> )                 | <5                              | ND                    |
| 8     | <i>E. coli</i> (HheC)    | trace                            | >99 ( <i>S</i> )                | <5                              | ND                    |
| 9     | <i>E. coli</i> (HheD)    | 6                                | 31 ( <i>R</i> )                 | <5                              | ND                    |
| 10    | <i>E. coli</i> (HheD2)   | trace                            | <5                              | <5                              | ND                    |
| 11    | <i>E. coli</i> (HheD6)   | trace                            | 16 ( <i>R</i> )                 | <5                              | ND                    |
| 12    | <i>E. coli</i> (HheD7)   | 5                                | 18 ( <i>S</i> )                 | <5                              | ND                    |
| 13    | <i>E. coli</i> (HheD8)   | 18                               | 74 ( <i>R</i> )                 | 18 ( <i>S</i> )                 | 8                     |
| 14    | <i>E. coli</i> (HheD14)  | trace                            | 6 ( <i>R</i> )                  | <5                              | ND                    |
| 15    | <i>E. coli</i> (HheD15)  | 7                                | 24 ( <i>R</i> )                 | <5                              | ND                    |
| 16    | <i>E. coli</i> (HheD16)  | trace                            | 37 ( <i>R</i> )                 | <5                              | ND                    |
| 17    | <i>E. coli</i> (HheE)    | trace                            | 46 ( <i>R</i> )                 | <5                              | ND                    |
| 18    | <i>E. coli</i> (HheE5)   | trace                            | 45 ( <i>R</i> )                 | <5                              | ND                    |
| 19    | <i>E. coli</i> (HHDHn1)  | trace                            | 29 ( <i>S</i> )                 | <5                              | ND                    |
| 20    | <i>E. coli</i> (HHDHn3)  | trace                            | 49 ( <i>S</i> )                 | <5                              | ND                    |
| 21    | <i>E. coli</i> (HHDHn4)  | trace                            | 45 ( <i>R</i> )                 | <5                              | ND                    |
| 22    | <i>E. coli</i> (HHDHn5)  | trace                            | 41 ( <i>R</i> )                 | <5                              | ND                    |
| 23    | <i>E. coli</i> (HHDHn6)  | trace                            | 34 ( <i>R</i> )                 | <5                              | ND                    |
| 24    | <i>E. coli</i> (HHDHn7)  | trace                            | <5                              | <5                              | ND                    |
| 25    | <i>E. coli</i> (HHDHn8)  | trace                            | 69 ( <i>R</i> )                 | <5                              | ND                    |
| 26    | <i>E. coli</i> (HHDHapb) | trace                            | 11 ( <i>R</i> )                 | <5                              | ND                    |

<sup>a</sup>The reactions were carried out in triplicate with 10 mM (*rac*)-**1b**, 10 mM NaN<sub>3</sub> and 10 g dcw/L *E. coli* (HDDH) cells in 5 mL PB buffer (50 mM, pH 7.5) at 30 °C for 10 h. <sup>b</sup>The yields and e.e. values were determined by chiral HPLC. <sup>c</sup>Calculated enantioselectivity:  $E = \ln[(1-ee_{1b})/(1+ee_{1b}/ee_{1c})]/\ln[(1+ee_{1b})/(1+ee_{1b}/ee_{1c})]$ . NR= no reaction. ND= not detected.

**Supplementary Table 4. Directed evolution of HheD8 for enantioselective dehalogenation of  $\gamma$ -haloalcohol (*rac*)-**1a**.<sup>a</sup>**

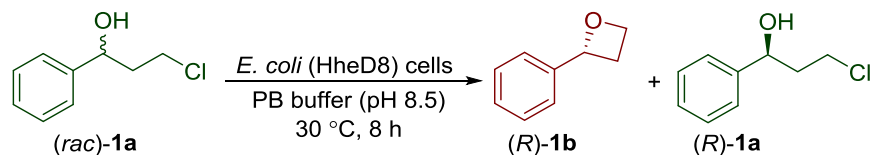

| entry | HheD8 | mutation               | conc. <b>1a</b><br>(mM) | <i>ee</i> ( <i>R</i> )- <b>1b</b><br>(%) <sup>b</sup> | <i>ee</i> ( <i>S</i> )- <b>1a</b><br>(%) <sup>b</sup> | conv. <b>1a</b><br>(%) <sup>c</sup> | <i>E</i> <sup>d</sup> |
|-------|-------|------------------------|-------------------------|-------------------------------------------------------|-------------------------------------------------------|-------------------------------------|-----------------------|
| 1     | WT    | -                      | 10                      | 82                                                    | 21                                                    | 20                                  | 12                    |
| 2     | M1    | A69F                   | 10                      | 98                                                    | 22                                                    | 18                                  | 123                   |
| 3     | M2    | A69F/R127G             | 10                      | 98                                                    | 54                                                    | 36                                  | 170                   |
| 4     | M3    | A69F/R127G/M124P       | 10                      | 98                                                    | 96                                                    | 50                                  | >200                  |
| 5     | M3    | A69F/R127G/M124P       | 20                      | >99                                                   | 76                                                    | 43                                  | >200                  |
| 6     | M4    | A69F/R127G/M124P/R182W | 20                      | >99                                                   | 94                                                    | 49                                  | >200                  |
| 7     | M5    | A69F/R127L             | 10                      | 91                                                    | 5                                                     | 5                                   | 22                    |
| 8     | M6    | A69F/R127L/M124P       | 10                      | 99                                                    | 38                                                    | 28                                  | >200                  |
| 9     | M7    | A69F/R127L/M124P/R182W | 20                      | >99                                                   | 36                                                    | 27                                  | >200                  |

<sup>a</sup>The reactions were carried out in triplicate with 10 mM (*rac*)-**1a** and 10 g dcw/L *E. coli* (HHDH) cells in 5 mL PB buffer (50 mM, pH 8.5) at 30 °C for 8 h. <sup>b</sup>The e.e. values were determined by chiral HPLC. <sup>c</sup>Calculated conversions:  $conv. = ee_{1a}/(ee_{1a}+ee_{1b})$ . <sup>d</sup>Calculated enantioselectivity:  $E = \ln[(1-ee_{1a})/(1+ee_{1a}/ee_{1b})]/\ln[(1+ee_{1a})/(1+ee_{1a}/ee_{1b})]$ .

**Supplementary Table 5. Directed evolution of HheD8 for enantioselective ring-opening of oxetane (*rac*)-**1b** with azide.<sup>a</sup>**

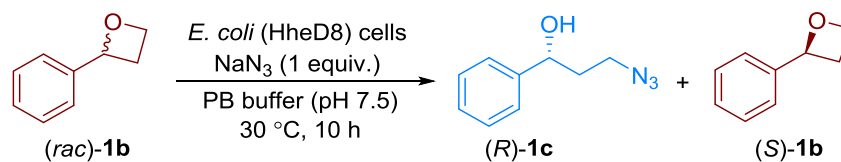

| entry | HheD8 | mutation               | conc. <b>1b</b><br>(mM) | ee ( <i>R</i> )- <b>1c</b><br>(%) <sup>b</sup> | ee ( <i>S</i> )- <b>1b</b><br>(%) <sup>b</sup> | conv. <b>1b</b><br>(%) <sup>c</sup> | <i>E</i> <sup>d</sup> |
|-------|-------|------------------------|-------------------------|------------------------------------------------|------------------------------------------------|-------------------------------------|-----------------------|
| 1     | WT    | -                      | 10                      | 75                                             | 21                                             | 22                                  | 9                     |
| 2     | M1    | A69F                   | 10                      | >99                                            | 17                                             | 15                                  | >200                  |
| 3     | M5    | A69F/R127L             | 10                      | 99                                             | 31                                             | 24                                  | >200                  |
| 4     | M6    | A69F/R127L/M124P       | 10                      | >99                                            | 75                                             | 43                                  | >200                  |
| 5     | M6    | A69F/R127L/M124P       | 20                      | >99                                            | 64                                             | 39                                  | >200                  |
| 6     | M7    | A69F/R127L/M124P/R182W | 20                      | >99                                            | 84                                             | 46                                  | >200                  |
| 7     | M2    | A69F/R127G             | 10                      | >99                                            | 19                                             | 16                                  | >200                  |
| 8     | M3    | A69F/R127G/M124P       | 20                      | 99                                             | 82                                             | 45                                  | >200                  |
| 9     | M4    | A69F/R127G/M124P/R182W | 20                      | 99                                             | >99                                            | 50                                  | >200                  |

<sup>a</sup>The reactions were carried out in triplicate with 10 mM (*rac*)-**1b**, 10 mM NaN<sub>3</sub> and 10 g dcw/L *E. coli* (HHDH) cells in 5 mL PB buffer (50 mM, pH 7.5) at 30 °C for 10 h. <sup>b</sup>The e.e. values were determined by chiral HPLC. <sup>c</sup>Calculated conversions:  $conv. = ee_{1b}/(ee_{1b}+ee_{1c})$ . <sup>d</sup>Calculated enantioselectivity:  $E = \ln[(1-ee_{1b})/(1+ee_{1b}/ee_{1c})]/\ln[(1+ee_{1b})/(1+ee_{1b}/ee_{1c})]$ .

**Supplementary Table 6. Scope of the biocatalytic enantioselective dehalogenation of  $\gamma$ -haloalcohols.<sup>a</sup>**

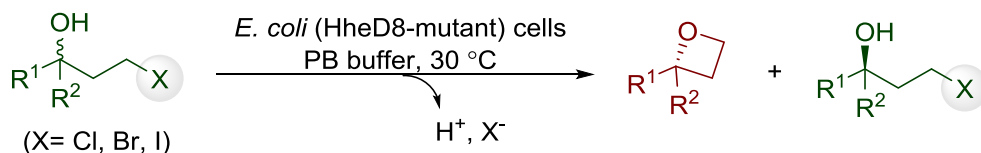

| Substrate              | Product    | T (h) | yield <b>b</b><br>(%) <sup>b</sup> | <i>ee</i> ( <i>R</i> )- <b>b</b><br>(%) <sup>c</sup> | yield <b>a</b><br>(%) <sup>b</sup> | <i>ee</i> ( <i>S</i> )- <b>a</b><br>(%) <sup>c</sup> | conv. <b>a</b><br>(%) <sup>d</sup> | <i>E</i> <sup>e</sup> |
|------------------------|------------|-------|------------------------------------|------------------------------------------------------|------------------------------------|------------------------------------------------------|------------------------------------|-----------------------|
| <b>1a</b>              | <b>1b</b>  | 8     | 41                                 | 98                                                   | 50                                 | >99                                                  | 50                                 | >200                  |
| <b>2a</b>              | <b>2b</b>  | 6     | 39                                 | 98                                                   | 49                                 | 98                                                   | 50                                 | >200                  |
| <b>3a</b>              | <b>3b</b>  | 24    | 43                                 | 97                                                   | 51                                 | 94                                                   | 49                                 | >200                  |
| <b>4a</b>              | <b>4b</b>  | 24    | 46                                 | 96                                                   | 50                                 | 93                                                   | 49                                 | 168                   |
| <b>5a</b>              | <b>5b</b>  | 24    | 33                                 | 99                                                   | 50                                 | 93                                                   | 48                                 | >200                  |
| <b>6a</b>              | <b>6b</b>  | 12    | 36                                 | >99                                                  | 47                                 | 94                                                   | 49                                 | >200                  |
| <b>7a</b>              | <b>7b</b>  | 48    | 45                                 | 98                                                   | 48                                 | 93                                                   | 49                                 | >200                  |
| <b>8a</b>              | <b>8b</b>  | 48    | 43                                 | 95                                                   | 50                                 | 92                                                   | 49                                 | 129                   |
| <b>9a</b>              | <b>9b</b>  | 24    | 34                                 | 99                                                   | 51                                 | 91                                                   | 48                                 | >200                  |
| <b>10a</b>             | <b>10b</b> | 48    | 43                                 | 97                                                   | 51                                 | 91                                                   | 48                                 | >200                  |
| <b>11a</b>             | <b>11b</b> | 12    | 34                                 | >99                                                  | 52                                 | 93                                                   | 48                                 | >200                  |
| <b>12a</b>             | <b>12b</b> | 48    | 37                                 | >99                                                  | 50                                 | 93                                                   | 48                                 | >200                  |
| <b>13a</b>             | <b>13b</b> | 48    | 42                                 | 98                                                   | 50                                 | 92                                                   | 48                                 | >200                  |
| <b>14a<sup>f</sup></b> | <b>14b</b> | 82    | 37                                 | 93                                                   | 53                                 | 86                                                   | 48                                 | 77                    |
| <b>15a</b>             | <b>15b</b> | 12    | 32                                 | 98                                                   | 51                                 | 92                                                   | 48                                 | >200                  |
| <b>16a<sup>g</sup></b> | <b>16b</b> | 82    | 37                                 | >99                                                  | 50                                 | 96                                                   | 49                                 | >200                  |
| <b>17a</b>             | <b>17b</b> | 1.5   | 36                                 | >99                                                  | 49                                 | >99                                                  | 50                                 | >200                  |
| <b>18a</b>             | <b>18b</b> | 77    | 42                                 | 97                                                   | 50                                 | 89                                                   | 48                                 | 198                   |
| <b>19a<sup>f</sup></b> | <b>19b</b> | 48    | 44                                 | 96                                                   | 48                                 | 97                                                   | 50                                 | >200                  |
| <b>20a</b>             | <b>20b</b> | 12    | NI                                 | NI                                                   | 50                                 | >99                                                  | ND                                 | ND                    |
| <b>21a<sup>f</sup></b> | <b>21b</b> | 60    | 35                                 | >99                                                  | 48                                 | >99                                                  | 49                                 | >200                  |
| <b>22a</b>             | <b>1b</b>  | 6     | 30                                 | 92                                                   | 50                                 | >99                                                  | 50                                 | 126                   |
| <b>23a</b>             | <b>1b</b>  | 1.5   | 39                                 | 93                                                   | 48                                 | >99                                                  | 50                                 | 145                   |

<sup>a</sup>The reactions were carried out with 20 mM (*rac*)-**a** and 10 g dcw/L *E. coli* (HHD8-M4) cells in 100 mL PB buffer (50 mM, pH 8.5) at 30 °C. <sup>b</sup>The isolated yield were obtained by silica gel chromatography. <sup>c</sup>The e.e. values were determined by chiral HPLC/GC. <sup>d</sup>Calculated conversions: *conv.* = *ee*<sub>a</sub>/(*ee*<sub>a</sub>+*ee*<sub>b</sub>). <sup>e</sup>Calculated enantioselectivity: *E* = ln[(1-*ee*<sub>a</sub>)/(1+*ee*<sub>a</sub>/*ee*<sub>b</sub>)]/ln[(1+*ee*<sub>a</sub>)/(1+*ee*<sub>a</sub>/*ee*<sub>b</sub>)]. <sup>f</sup>Reactions were carried out at the substrate concentration of 10 mM. <sup>g</sup>Reaction was carried out with *E. coli* (HHD8-M3) cells. NI: the oxetane **20b** was not isolated due to its unstable properties. ND= not detected.

**Supplementary Table 7. Scope of the biocatalytic enantioselective ring-opening of oxetanes.<sup>a</sup>**

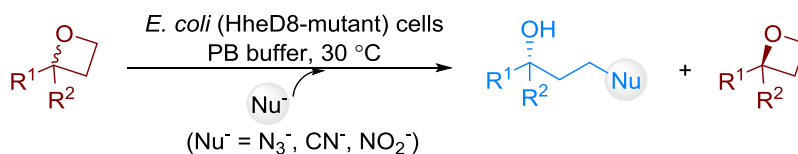

| Substrate              | Product    | T (h) | yield <b>c/d/e/f</b><br>(%) <sup>b</sup> | <i>ee</i> ( <i>R</i> )- <b>c/d/e/f</b><br>(%) <sup>c</sup> | yield <b>b</b><br>(%) <sup>b</sup> | <i>ee</i> ( <i>S</i> )- <b>b</b><br>(%) <sup>c</sup> | conv. <b>b</b><br>(%) <sup>d</sup> | <i>E</i> <sup>e</sup> |
|------------------------|------------|-------|------------------------------------------|------------------------------------------------------------|------------------------------------|------------------------------------------------------|------------------------------------|-----------------------|
| <b>1b</b>              | <b>1c</b>  | 10    | 47                                       | 97                                                         | 33                                 | >99                                                  | 51                                 | >200                  |
| <b>2b</b>              | <b>2c</b>  | 10    | 48                                       | 98                                                         | 35                                 | >99                                                  | 50                                 | >200                  |
| <b>3b</b>              | <b>3c</b>  | 37    | 48                                       | 94                                                         | 42                                 | 92                                                   | 49                                 | 106                   |
| <b>4b</b>              | <b>4c</b>  | 60    | 44                                       | 91                                                         | 48                                 | 93                                                   | 51                                 | 72                    |
| <b>5b</b>              | <b>5c</b>  | 33    | 44                                       | 97                                                         | 30                                 | 97                                                   | 50                                 | >200                  |
| <b>6b</b>              | <b>6c</b>  | 12    | 47                                       | >99                                                        | 38                                 | >99                                                  | 50                                 | >200                  |
| <b>7b</b>              | <b>7c</b>  | 24    | 47                                       | 97                                                         | 46                                 | 94                                                   | 49                                 | >200                  |
| <b>8b</b>              | <b>8c</b>  | 23    | 48                                       | 95                                                         | 48                                 | 95                                                   | 50                                 | 146                   |
| <b>9b</b>              | <b>9c</b>  | 24    | 48                                       | 98                                                         | 37                                 | 94                                                   | 49                                 | >200                  |
| <b>10b</b>             | <b>10c</b> | 24    | 43                                       | 95                                                         | 42                                 | 95                                                   | 50                                 | 146                   |
| <b>11b</b>             | <b>11c</b> | 16    | 50                                       | 98                                                         | 36                                 | >99                                                  | 50                                 | >200                  |
| <b>12b</b>             | <b>12c</b> | 11    | 48                                       | 99                                                         | 45                                 | 97                                                   | 49                                 | >200                  |
| <b>13b</b>             | <b>13c</b> | 26    | 47                                       | 98                                                         | 42                                 | 98                                                   | 50                                 | >200                  |
| <b>14b<sup>f</sup></b> | <b>14c</b> | 45    | 41                                       | 94                                                         | 49                                 | 86                                                   | 48                                 | 90                    |
| <b>15b</b>             | <b>15c</b> | 16    | 43                                       | >99                                                        | 42                                 | >99                                                  | 50                                 | >200                  |
| <b>16b<sup>g</sup></b> | <b>16c</b> | 45    | 43                                       | 95                                                         | 35                                 | 98                                                   | 51                                 | 180                   |
| <b>17b<sup>h</sup></b> | <b>17c</b> | 14    | 39                                       | >99                                                        | 27                                 | 85                                                   | 46                                 | >200                  |
| <b>18b<sup>i</sup></b> | <b>18c</b> | 26    | 48                                       | 98                                                         | 45                                 | 99                                                   | 50                                 | >200                  |
| <b>19b<sup>j</sup></b> | <b>19c</b> | 30    | 49                                       | >99                                                        | 46                                 | 95                                                   | 49                                 | >200                  |
| <b>21b<sup>k</sup></b> | <b>21c</b> | 96    | 43                                       | 97                                                         | 32                                 | 89                                                   | 48                                 | 198                   |
| <b>1b<sup>l</sup></b>  | <b>1d</b>  | 22    | 46                                       | >99                                                        | 37                                 | 97                                                   | 49                                 | >200                  |
| <b>1b<sup>m</sup></b>  | <b>1e</b>  | 24    | 23                                       | >99                                                        | 43                                 | >99                                                  | 50                                 | >200                  |
|                        | <b>1f</b>  |       | 19                                       | 88                                                         |                                    |                                                      |                                    | 82                    |

<sup>a</sup>The reactions were carried out with 20 mM (*rac*)-**b**, 20 mM NaN<sub>3</sub> and 10 g dcw/L *E. coli* (HHD8-M4) cells in 100 mL PB buffer (50 mM, pH 7.5) at 30 °C. <sup>b</sup>The isolated yield were obtained by silica gel chromatography. <sup>c</sup>The e.e. values were determined by chiral HPLC/GC. <sup>d</sup>Calculated conversions: *conv.* = ee<sub>b</sub>/(ee<sub>b</sub>+ee<sub>c</sub>). <sup>e</sup>Calculated enantioselectivity: *E* = ln[(1-ee<sub>b</sub>)/(1+ee<sub>b</sub>/ee<sub>c</sub>)]/ln[(1+ee<sub>b</sub>)/(1+ee<sub>b</sub>/ee<sub>c</sub>)]. <sup>f</sup>The reaction was carried out with 5 mM (*rac*)-**14b**, 5 mM NaN<sub>3</sub> and 10 g dcw/L *E. coli* (HHD8-M4) cells. <sup>g</sup>The reaction was carried out with 5 mM (*rac*)-**16b**, 5 mM NaN<sub>3</sub> and 10 g dcw/L *E. coli* (HHD8-M3). <sup>h</sup>The reaction was carried with 5 mM (*rac*)-**17b**, 15 mM NaN<sub>3</sub> and 30 g dcw/L *E. coli* (HHD8-M7) cells in 100 mL Gly-NaOH buffer (300 mM, pH 9.5). <sup>i</sup>The reaction was carried out with 20 mM (*rac*)-**18b**, 20 mM NaN<sub>3</sub> and 10 g dcw/L *E. coli* (HHD8-M4) cells in 100 mL PB buffer (50 mM, pH 6.5). <sup>j</sup>The reaction was carried out with 10 mM (*rac*)-**19b**, 10 mM NaN<sub>3</sub> and 10 g dcw/L *E. coli* (HHD8-M4) cells in 100 mL PB buffer (50 mM, pH 6.5). <sup>k</sup>The reaction was carried out in 200 mL round-bottom flask with 5 mM (*rac*)-**21b**, 15 mM NaN<sub>3</sub> and 30 g dcw/L *E. coli* (HHD8-M4) cells. <sup>l</sup>The reaction was carried with 20 mM (*rac*)-**1b**, 40 mM mandelonitrile and 10 g dcw/L *E. coli* (HHD8-M4) cells. <sup>m</sup>The reaction was carried out with 40 mM (*rac*)-**1b**, 40 mM NaNO<sub>2</sub> and 10 g dcw/L *E. coli* (HHD8-M4) cells in 200 mL PB buffer (50 mM, pH 7.5).

**Supplementary Table 8. Ring-opening of (*rac*)-**1b** with cyanate and thiocyanate.<sup>a</sup>**

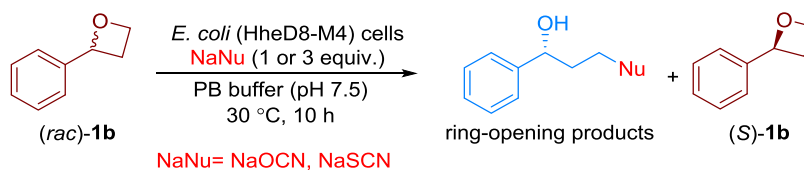

| entry | Nucleophile (NaNu) | NaNu: <b>1b</b> | Conversion <b>1b</b> (%) <sup>b</sup> | <i>ee</i> ( <i>S</i> )- <b>1b</b> (%) <sup>b</sup> | <i>E</i> <sup>c</sup> |
|-------|--------------------|-----------------|---------------------------------------|----------------------------------------------------|-----------------------|
| 1     | NaOCN              | 1:1             | 28                                    | 8                                                  | 2                     |
| 2     | NaOCN              | 1:3             | 29                                    | 8                                                  | 2                     |
| 3     | NaSCN              | 1:1             | 29                                    | 7                                                  | 2                     |
| 4     | NaSCN              | 1:3             | 32                                    | 11                                                 | 2                     |

<sup>a</sup>The reactions were carried out in triplicate with 5 mM (*rac*)-**1b**, 5 or 15 mM NaNu and 20 g dcw/L *E. coli* (HheD8-M4) cells in 5 mL PB buffer (50 mM, pH 7.5) at 30 °C for 24 h. <sup>b</sup>The conversions and *ee* values of **1b** were determined by chiral HPLC. <sup>c</sup>Calculated enantioselectivity:  $E = \ln[(1-c)/(1-ee_s)]/\ln[(1-c)/(1+ee_s)]$ . *c*= Conversion of **1b**; *ee<sub>s</sub>*= e.e. values of (*S*)-**1b**.

**Supplementary Table 9. Time-course studies of the enantioselective dehalogenation reaction of (*rac*)-1a at different substrate concentrations.<sup>a</sup>**

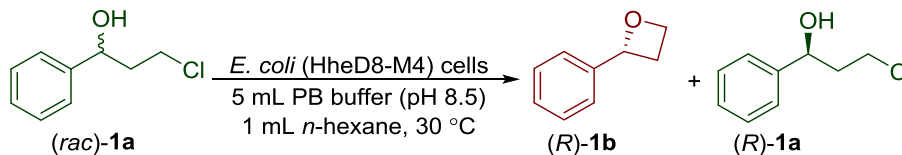

| Concentration <b>1a</b> (mM) | T (h) | <i>ee</i> ( <i>R</i> )- <b>1b</b> (%) <sup>b</sup> | <i>ee</i> ( <i>S</i> )- <b>1a</b> (%) <sup>b</sup> | Conversion (%) <sup>c</sup> | <i>E</i> <sup>d</sup> |
|------------------------------|-------|----------------------------------------------------|----------------------------------------------------|-----------------------------|-----------------------|
| 40                           | 3     | >99                                                | 96                                                 | 49                          | >200                  |
|                              | 6     | >99                                                | >99                                                | 50                          | >200                  |
|                              | 12    | >99                                                | >99                                                | 50                          | >200                  |
|                              | 24    | >99                                                | >99                                                | 50                          | >200                  |
| 80                           | 3     | >99                                                | 44                                                 | 31                          | >200                  |
|                              | 6     | >99                                                | 80                                                 | 44                          | >200                  |
|                              | 12    | >99                                                | 92                                                 | 48                          | >200                  |
|                              | 24    | >99                                                | 96                                                 | 49                          | >200                  |
|                              | 36    | >99                                                | 98                                                 | 49                          | >200                  |
|                              | 48    | >99                                                | 97                                                 | 49                          | >200                  |
| 100                          | 3     | >99                                                | 32                                                 | 24                          | >200                  |
|                              | 6     | >99                                                | 57                                                 | 36                          | >200                  |
|                              | 12    | >99                                                | 79                                                 | 44                          | >200                  |
|                              | 24    | >99                                                | 92                                                 | 48                          | >200                  |
|                              | 36    | >99                                                | 94                                                 | 48                          | >200                  |
|                              | 48    | >99                                                | 96                                                 | 49                          | >200                  |
| 120                          | 3     | >99                                                | 26                                                 | 21                          | >200                  |
|                              | 6     | >99                                                | 44                                                 | 31                          | >200                  |
|                              | 12    | >99                                                | 67                                                 | 40                          | >200                  |
|                              | 24    | >99                                                | 85                                                 | 46                          | >200                  |
|                              | 36    | >99                                                | 91                                                 | 48                          | >200                  |
|                              | 48    | >99                                                | 92                                                 | 48                          | >200                  |
| 140                          | 3     | >99                                                | 22                                                 | 18                          | >200                  |
|                              | 6     | >99                                                | 39                                                 | 28                          | >200                  |
|                              | 12    | >99                                                | 57                                                 | 36                          | >200                  |
|                              | 24    | >99                                                | 75                                                 | 43                          | >200                  |
|                              | 36    | >99                                                | 84                                                 | 46                          | >200                  |
|                              | 48    | >99                                                | 87                                                 | 47                          | >200                  |

<sup>a</sup>The reactions were carried out at 30 °C within a two-phase system (PB buffer, 5 mL, 200 mM, pH 8.5; *n*-hexane, 1 mL) containing 40-140 mM (*rac*)-**1a** and 10 g dcw/L *E. coli* (HHD8-M4) cells. <sup>b</sup>The e.e. values were determined by chiral HPLC. <sup>c</sup>Calculated conversions:  $conv. = ee_{1a}/(ee_{1a}+ee_{1b})$ . <sup>d</sup>Calculated enantioselectivity:  $E = \ln[(1-ee_{1a})/(1+ee_{1a}/ee_{1b})]/\ln[(1+ee_{1a})/(1+ee_{1a}/ee_{1b})]$ .

**Supplementary Table 10. Time-course studies of the enantioselective azide-mediated ring-opening reaction of (*rac*)-**1b** at different substrate concentrations.<sup>a</sup>**

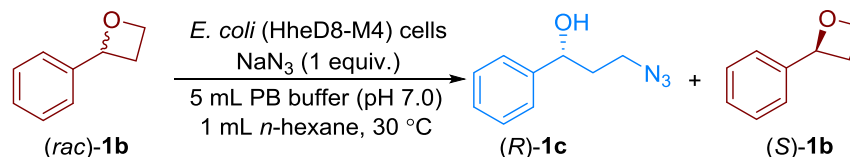

| Concentration <b>1b</b> (mM) | T (h) | <i>ee</i> ( <i>R</i> )- <b>1c</b> (%) <sup>b</sup> | <i>ee</i> ( <i>S</i> )- <b>1b</b> (%) <sup>b</sup> | Conversion (%) <sup>c</sup> | <i>E</i> <sup>e</sup> |
|------------------------------|-------|----------------------------------------------------|----------------------------------------------------|-----------------------------|-----------------------|
| 40                           | 3     | >99                                                | 44                                                 | 31                          | >200                  |
|                              | 6     | >99                                                | 81                                                 | 45                          | >200                  |
|                              | 12    | >99                                                | 99                                                 | 50                          | >200                  |
|                              | 24    | >99                                                | >99                                                | 50                          | >200                  |
|                              | 36    | >99                                                | >99                                                | 50                          | >200                  |
| 80                           | 3     | >99                                                | 25                                                 | 20                          | >200                  |
|                              | 6     | >99                                                | 51                                                 | 34                          | >200                  |
|                              | 12    | >99                                                | 87                                                 | 47                          | >200                  |
|                              | 24    | >99                                                | >99                                                | 50                          | >200                  |
|                              | 36    | >99                                                | >99                                                | 50                          | >200                  |
| 120                          | 3     | >99                                                | 25                                                 | 20                          | >200                  |
|                              | 6     | >99                                                | 46                                                 | 32                          | >200                  |
|                              | 12    | >99                                                | 80                                                 | 44                          | >200                  |
|                              | 24    | >99                                                | >99                                                | 50                          | >200                  |
|                              | 36    | >99                                                | >99                                                | 50                          | >200                  |
| 160                          | 3     | >99                                                | 18                                                 | 15                          | >200                  |
|                              | 6     | >99                                                | 33                                                 | 25                          | >200                  |
|                              | 12    | >99                                                | 63                                                 | 39                          | >200                  |
|                              | 24    | >99                                                | 96                                                 | 49                          | >200                  |
|                              | 36    | >99                                                | >99                                                | 50                          | >200                  |
| 200                          | 3     | >99                                                | 14                                                 | 12                          | >200                  |
|                              | 6     | >99                                                | 28                                                 | 22                          | >200                  |
|                              | 12    | >99                                                | 51                                                 | 34                          | >200                  |
|                              | 24    | >99                                                | 92                                                 | 48                          | >200                  |
|                              | 36    | >99                                                | 99                                                 | 50                          | >200                  |

<sup>a</sup>The reactions were carried out at 30 °C within a two-phase system (PB buffer, 5 mL, 300 mM, pH 7.0; *n*-hexane, 1 mL) containing 40-200 mM (*rac*)-**1b**, 1 equivalent NaN<sub>3</sub>, and 10 g dcw/L *E. coli* (HHD8-M4) cells. <sup>b</sup>The e.e. values were determined by chiral HPLC. <sup>c</sup>Calculated conversions: *conv.* = *ee*<sub>1b</sub>/(*ee*<sub>1b</sub>+*ee*<sub>1c</sub>). <sup>d</sup>Calculated enantioselectivity: *E* = ln[(1-*ee*<sub>1b</sub>)/(1+*ee*<sub>1b</sub>/*ee*<sub>1c</sub>)]/ln[(1+*ee*<sub>1b</sub>)/(1+*ee*<sub>1b</sub>/*ee*<sub>1c</sub>)].



**Supplementary Table 11.** Crystal data and structure refinement for (*R*)-**1cb**.

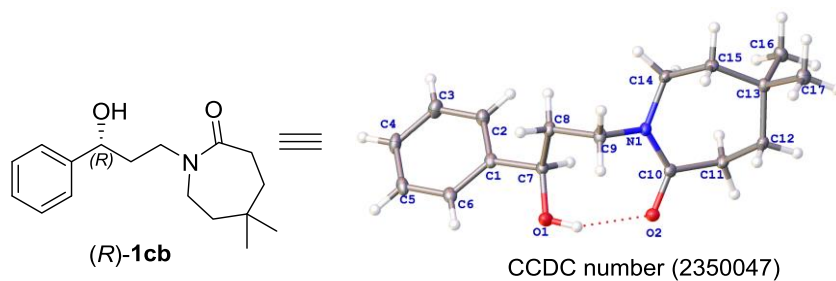

|                                             |                                                               |
|---------------------------------------------|---------------------------------------------------------------|
| Identification code                         | ( <i>R</i> )- <b>1cb</b>                                      |
| Empirical formula                           | C <sub>17</sub> H <sub>25</sub> NO <sub>2</sub>               |
| Formula weight                              | 275.38                                                        |
| Temperature/K                               | 99.98(11)                                                     |
| Crystal system                              | monoclinic                                                    |
| Space group                                 | P2 <sub>1</sub>                                               |
| a/Å                                         | 6.0384(3)                                                     |
| b/Å                                         | 7.4549(4)                                                     |
| c/Å                                         | 17.5882(11)                                                   |
| α/°                                         | 90                                                            |
| β/°                                         | 99.789(6)                                                     |
| γ/°                                         | 90                                                            |
| Volume/Å <sup>3</sup>                       | 780.22(8)                                                     |
| Z                                           | 2                                                             |
| ρ <sub>calc</sub> /cm <sup>3</sup>          | 1.172                                                         |
| μ/mm <sup>-1</sup>                          | 0.596                                                         |
| F(000)                                      | 300.0                                                         |
| Crystal size/mm <sup>3</sup>                | 0.14 × 0.12 × 0.11                                            |
| Radiation                                   | Cu Kα (λ = 1.54184)                                           |
| 2θ range for data collection/°              | 5.098 to 148.018                                              |
| Index ranges                                | -7 ≤ h ≤ 6, -9 ≤ k ≤ 6, -21 ≤ l ≤ 21                          |
| Reflections collected                       | 7816                                                          |
| Independent reflections                     | 2532 [R <sub>int</sub> = 0.0232, R <sub>sigma</sub> = 0.0154] |
| Data/restraints/parameters                  | 2532/1/185                                                    |
| Goodness-of-fit on F <sup>2</sup>           | 1.042                                                         |
| Final R indexes [I ≥ 2σ (I)]                | R <sub>1</sub> = 0.0266, wR <sub>2</sub> = 0.0675             |
| Final R indexes [all data]                  | R <sub>1</sub> = 0.0268, wR <sub>2</sub> = 0.0676             |
| Largest diff. peak/hole / e Å <sup>-3</sup> | 0.20/-0.12                                                    |
| Flack/Hoof parameter                        | 0.08(9)/0.09(6)                                               |

### 3. Supplementary Figures 1-2

**Supplementary Fig. 1 | Cartoon and surface representation of the mutant HheD8-M3 complex with chloride.** The ligand  $\text{Cl}^-$  is highlighted in green sphere.

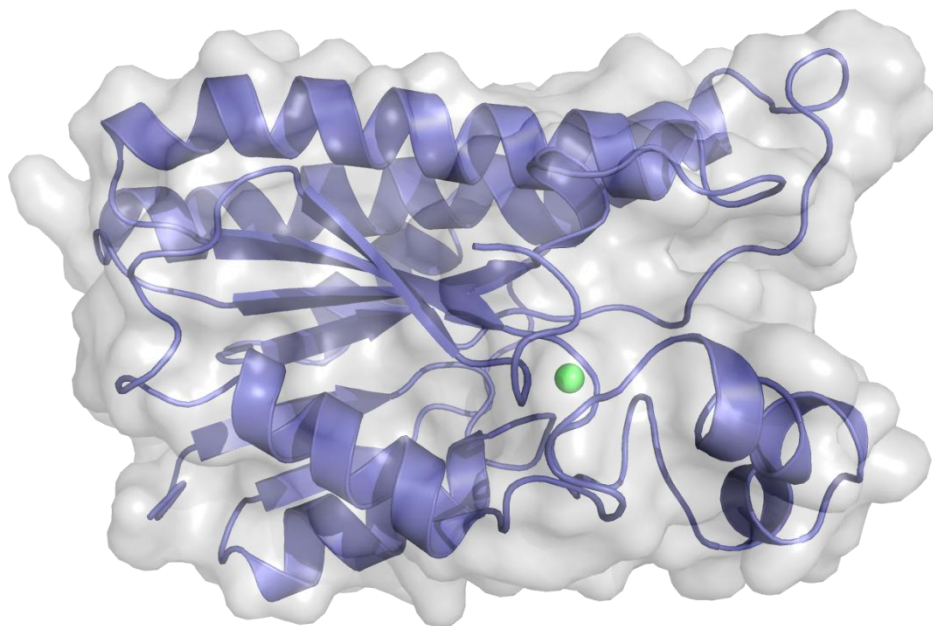

**Supplementary Fig. 2 | Overlap structure analysis of the mutant HheD8-M3 with HheD8-WT/AF.** HheD8-M3 (PDB code: 8XXB) is shown as blue cartoon. HheD8-WT/AF (AFDB code: AF-N6YXW4-F1) is shown as gray cartoon. Catalytic triads S117-Y130-R134 are highlighted in sticks.

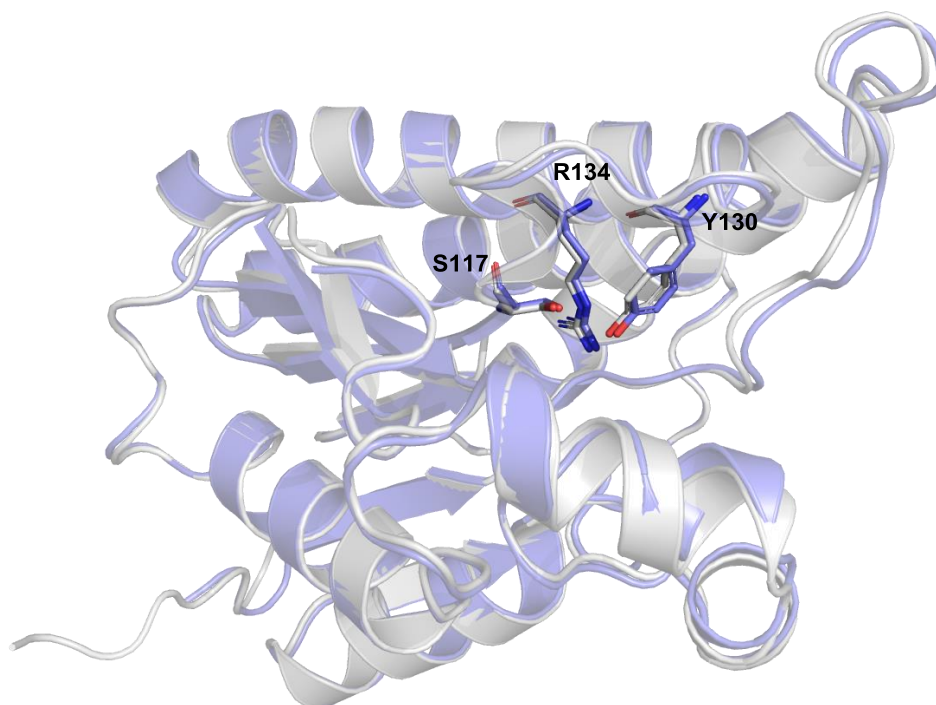

## 4. Chemical synthesis and characterization of racemic compounds

### Synthesis of racemic $\gamma$ -haloalcohols:

#### Method A

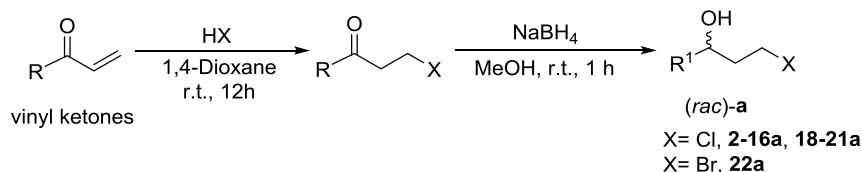

#### Method B

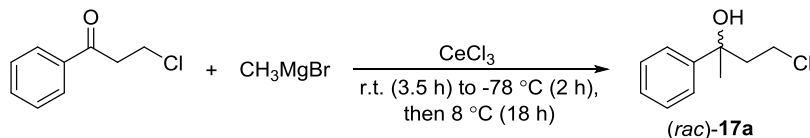

#### Method C

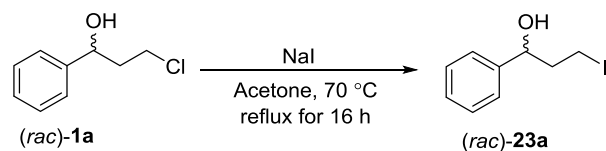

Racemic  $\gamma$ -haloalcohols **2-16a** and **18-22a** were synthesized from the corresponding vinyl ketones (Method A)<sup>17,18</sup>. General procedure: To a 100-mL round-bottom flask, 20 mmol of vinyl ketone substrates was added, followed by the addition of 10 mL HCl (4 M in 1,4-dioxane). The reaction mixture was then stirred at room temperature for 12 h. Afterward, the reaction mixture was concentrated under reduced pressure to obtain the crude  $\beta$ -halo ketone intermediates. To a 100-mL round-bottom flask cooled with an ice bath, 15 mmol (1.0 eq.) crude  $\beta$ -halo ketones and 20 mL of methanol were added, followed by the addition of 18 mmol (1.2 eq.)  $NaBH_4$ . The reaction mixture was then stirred at room temperature for 1 h. Afterward, the methanol solvent was removed under reduced pressure, followed by the addition of 10 mL distilled water to the flask. The mixture was then extracted with ethyl acetate ( $3 \times 10$  mL) and saturated brine (twice). The organic layer was then dried over anhydrous  $Na_2SO_4$  and concentrated under reduced pressure to obtain the crude product. The resulting mixture was purified by flash chromatography (petroleum ether: ethyl acetate = 30:1 ~ 15:1; dichloromethane : ethyl acetate = 6:1 ~ 3:1) to afford the racemic  $\gamma$ -haloalcohols (rac)-a.

Racemic  $\gamma$ -chloroalcohol **17a** was synthesized from the corresponding  $\beta$ -halo ketone (Method B)<sup>19</sup>. To a 200-mL round-bottom flask, 5.6 g (22.6 mmol) of anhydrous  $CeCl_3$  and 40 mL of dry tetrahydrofuran (THF) were added under nitrogen atmosphere. The reaction mixture was

then stirred at room temperature for 3.5 h and cooled to -78 °C, followed by the addition of 40 mL methylmagnesium bromide (1M in THF). The reaction was allowed to proceed at -78 °C for 2 h. Then, 3.4 g (20 mmol) 3-chloro-1-phenylpropan-1-one in 30 mL dry THF was added dropwise to the reaction mixture. The temperature was then gradually raised to 8 °C and the reaction was allowed to proceed for 18 h. Afterward, the reaction mixture was quenched with 15 mL of saturated NH<sub>4</sub>Cl solution, extracted with ethyl acetate (3 × 20 mL), and washed with saturated brine. The organic layer was then dried over anhydrous Na<sub>2</sub>SO<sub>4</sub> and concentrated under reduced pressure to obtain the crude product. The resulting mixture was purified by flash chromatography (petroleum ether: ethyl acetate = 30:1~20:1) to afford the racemic  $\gamma$ -chloroalcohol (*rac*)-**17a**.

Racemic  $\gamma$ -iodoalcohol **23a** was synthesized from racemic **1a**<sup>20</sup>. To a 100-mL round-bottom flask, 1.0 g (5.89 mmol) of (*rac*)-**1a** and 25 mL of acetone were added, followed by the addition of 1.5 g (9.96 mmol) sodium iodide. The temperature was then gradually raised to 70 °C and the reaction was refluxed for 16 h. Afterward, the acetone was removed under reduced pressure, followed by the addition of 10 mL distilled water to the flask. The mixture was then extracted with ethyl acetate (3 × 10 mL) and saturated brine (twice). The organic layer was then dried over anhydrous Na<sub>2</sub>SO<sub>4</sub> and concentrated under reduced pressure to afford the racemic  $\gamma$ -iodoalcohol (*rac*)-**23a**.

**(*rac*)-3-chloro-1-(2-fluorophenyl)propan-1-ol [(*rac*)-2a]**

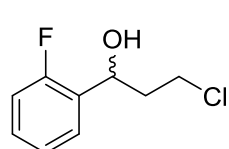

<sup>1</sup>H NMR (400 MHz, CDCl<sub>3</sub>)  $\delta$  7.45 (td,  $J$  = 7.5, 1.8 Hz, 1H), 7.29 - 7.24 (m, 1H), 7.15 (t,  $J$  = 7.6 Hz, 1H), 7.05 - 7.00 (m, 1H), 5.22 (dd,  $J$  = 8.5, 4.3 Hz, 1H), 3.77 - 3.71 (m, 1H), 3.61 (dt,  $J$  = 11.0, 6.0 Hz, 1H), 2.27 - 2.11 (m, 3H).

<sup>13</sup>C NMR (100 MHz, CDCl<sub>3</sub>)  $\delta$  159.8 (d,  $J$  = 245.0 Hz), 130.6 (d,  $J$  = 13.0 Hz), 129.4 (d,  $J$  = 8.0 Hz), 127.4 (d,  $J$  = 5.0 Hz), 124.5 (d,  $J$  = 3.0 Hz), 115.6 (d,  $J$  = 22.0 Hz), 65.9, 41.6, 40.2 (d,  $J$  = 1.0 Hz).

**(*rac*)-3-chloro-1-(2-chlorophenyl)propan-1-ol [(*rac*)-3a]**

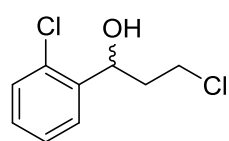

<sup>1</sup>H NMR (400 MHz, CDCl<sub>3</sub>)  $\delta$  7.56 (dd,  $J$  = 7.6, 1.7 Hz, 1H), 7.35 - 7.28 (m, 2H), 7.22 (td,  $J$  = 7.7, 1.8 Hz, 1H), 5.34 (dd,  $J$  = 9.0, 3.3 Hz, 1H), 3.83 - 3.76 (m, 1H), 3.71 - 3.65 (m, 1H), 2.25 - 2.17 (m, 2H), 2.14 - 2.05 (m, 1H). <sup>13</sup>C

NMR (100 MHz, CDCl<sub>3</sub>)  $\delta$  141.2, 131.8, 129.7, 128.9, 127.4, 127.1, 68.1, 41.8, 39.8.

**(rac)-1-(2-bromophenyl)-3-chloropropan-1-ol [(rac)-4a]**

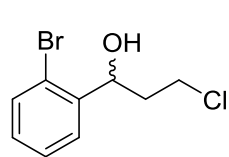

**<sup>1</sup>H NMR (400 MHz, CDCl<sub>3</sub>)** δ 7.54 (dd, *J* = 11.8, 8.1 Hz, 2H), 7.34 (t, *J* = 7.5 Hz, 1H), 7.15 (t, *J* = 7.7 Hz, 1H), 5.28 (d, *J* = 9.3 Hz, 1H), 3.83 - 3.77 (m, 1H), 3.71 - 3.66 (m, 1H), 2.41 (s, 1H), 2.25 - 2.17 (m, 1H), 2.10 - 2.01 (m, 1H). **<sup>13</sup>C**

**NMR (100 MHz, CDCl<sub>3</sub>)** δ 142.8, 132.9, 129.2, 128.0, 127.3, 121.8, 70.3, 41.8, 39.8.

**(rac)-3-chloro-1-(o-tolyl)propan-1-ol [(rac)-5a]**

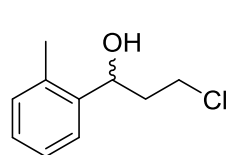

**<sup>1</sup>H NMR (400 MHz, CDCl<sub>3</sub>)** δ 7.48 (d, *J* = 7.6 Hz, 1H), 7.27 - 7.14 (m, 3H), 5.20 (dd, *J* = 8.8, 3.7 Hz, 1H), 3.86 - 3.79 (m, 1H), 3.68 - 3.62 (m, 1H), 2.36 (s, 3H), 2.17 - 2.04 (m, 2H). **<sup>13</sup>C NMR (100 MHz, CDCl<sub>3</sub>)** δ 142.1, 134.5,

130.6, 127.6, 126.5, 125.1, 67.6, 42.2, 40.6, 19.0.

**(rac)-3-chloro-1-(3-fluorophenyl)propan-1-ol [(rac)-6a]**

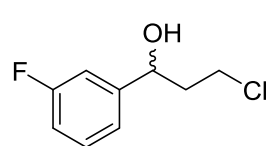

**<sup>1</sup>H NMR (400 MHz, CDCl<sub>3</sub>)** δ 7.32 (td, *J* = 8.1, 6.2 Hz, 1H), 7.13 - 7.06 (m, 2H), 6.98 (td, *J* = 8.4, 2.6 Hz, 1H), 4.94 (dd, *J* = 8.8, 4.6 Hz, 1H), 3.76 - 3.70 (m, 1H), 3.55 (dt, *J* = 11.0, 5.8 Hz, 1H), 2.31 (d, *J* = 13.8 Hz, 1H),

2.22 - 2.14 (m, 1H), 2.10 - 2.01 (m, 1H). **<sup>13</sup>C NMR (100 MHz, CDCl<sub>3</sub>)** δ 163.1 (d, *J* = 245.0 Hz), 146.5 (d, *J* = 6.0 Hz), 130.3 (d, *J* = 7.0 Hz), 121.4, 114.8 (d, *J* = 21.0 Hz), 112.8 (d, *J* = 22.0 Hz), 70.7 (d, *J* = 11.0 Hz), 41.6, 41.4.

**(rac)-3-chloro-1-(3-chlorophenyl)propan-1-ol [(rac)-7a]**

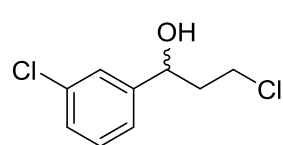

**<sup>1</sup>H NMR (400 MHz, CDCl<sub>3</sub>)** δ 7.37 (s, 1H), 7.32 - 7.22 (m, 3H), 4.93 (dd, *J* = 8.3, 4.3 Hz, 1H), 3.78 - 3.71 (m, 1H), 3.59 - 3.53 (m, 1H), 2.23 - 2.02 (m, 3H). **<sup>13</sup>C NMR (100 MHz, CDCl<sub>3</sub>)** δ 145.9, 134.7, 130.1, 128.1, 126.1,

124.0, 70.8, 41.6, 41.2.

**(rac)-1-(3-bromophenyl)-3-chloropropan-1-ol [(rac)-8a]**

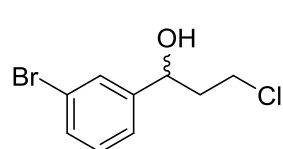

**<sup>1</sup>H NMR (400 MHz, CDCl<sub>3</sub>)** δ 7.53 (s, 1H), 7.42 (dt, *J* = 7.7, 1.6 Hz, 1H), 7.29 - 7.21 (m, 2H), 4.94 - 4.91 (m, 1H), 3.78 - 3.71 (m, 1H), 3.56 (dt, *J* = 11.0, 5.7 Hz, 1H), 2.23 - 2.14 (m, 2H), 2.10 - 2.01 (m, 1H). **<sup>13</sup>C NMR (100**

**MHz, CDCl<sub>3</sub>)** δ 146.2, 131.1, 130.4, 129.0, 124.5, 122.9, 70.7, 41.6, 41.5.

**(rac)-3-chloro-1-(m-tolyl)propan-1-ol [(rac)-9a]**

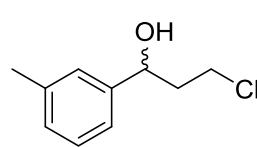

<sup>1</sup>H NMR (400 MHz, CDCl<sub>3</sub>) δ 7.25 (t, *J* = 7.5 Hz, 1H), 7.17 - 7.10 (m, 3H), 4.88 (dd, *J* = 8.6, 4.7 Hz, 1H), 3.75 - 3.69 (m, 1H), 3.55 (dt, *J* = 10.9, 6.0 Hz, 1H), 2.36 (s, 3H), 2.26 - 2.17 (m, 1H), 2.12 - 2.03 (m, 2H). <sup>13</sup>C NMR (100 MHz, CDCl<sub>3</sub>) δ 143.8, 138.5, 128.8, 128.7, 126.6, 122.9, 71.4, 41.9, 41.5, 21.6.

**(rac)-3-chloro-1-(3-methoxyphenyl)propan-1-ol [(rac)-10a]**

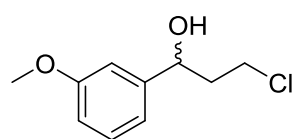

<sup>1</sup>H NMR (400 MHz, CDCl<sub>3</sub>) δ 7.27 (t, *J* = 7.6 Hz, 1H), 6.94 - 6.90 (m, 2H), 6.84 - 6.81 (m, 1H), 4.89 (dd, *J* = 8.5, 4.6 Hz, 1H), 3.80 (s, 3H), 3.76 - 3.69 (m, 1H), 3.58 - 3.51 (m, 1H), 2.26 - 2.16 (m, 2H), 2.11 - 2.02 (m, 1H). <sup>13</sup>C NMR (100 MHz, CDCl<sub>3</sub>) δ 159.9, 145.5, 129.8, 118.1, 113.4, 111.3, 71.3, 55.3, 41.8, 41.5.

**(rac)-3-chloro-1-(4-fluorophenyl)propan-1-ol [(rac)-11a]**

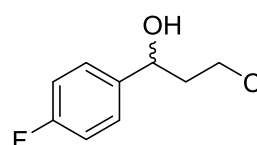

<sup>1</sup>H NMR (400 MHz, CDCl<sub>3</sub>) δ 7.28 - 7.23 (m, 2H), 7.00 (t, *J* = 8.6 Hz, 2H), 4.84 (dd, *J* = 8.6, 5.1 Hz, 1H), 3.67 - 3.60 (m, 1H), 3.48 - 3.41 (m, 1H), 3.06 (s, 1H), 2.16 - 2.07 (m, 1H), 2.02 - 1.93 (m, 1H). <sup>13</sup>C NMR (100 MHz, CDCl<sub>3</sub>) δ 162.4 (d, *J* = 244.0 Hz), 139.5 (d, *J* = 3.0 Hz), 127.6 (d, *J* = 8.0 Hz), 115.6 (d, *J* = 21.0 Hz), 70.7 (d, *J* = 11.0 Hz), 41.7, 41.5.

**(rac)-3-chloro-1-(4-chlorophenyl)propan-1-ol [(rac)-12a]**

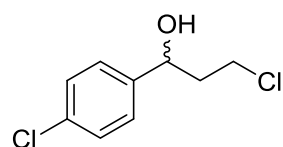

<sup>1</sup>H NMR (400 MHz, CDCl<sub>3</sub>) δ 7.29 (q, *J* = 8.4 Hz, 4H), 4.91 (dt, *J* = 8.7, 4.1 Hz, 1H), 3.75 - 3.68 (m, 1H), 3.51 (dt, *J* = 11.0, 5.9 Hz, 1H), 2.29 (d, *J* = 4.8 Hz, 1H), 2.22 - 2.13 (m, 1H), 2.07 - 1.99 (m, 1H). <sup>13</sup>C NMR (100 MHz, CDCl<sub>3</sub>) δ 142.2, 133.6, 128.9, 127.3, 70.7, 41.7, 41.4.

**(rac)-1-(4-bromophenyl)-3-chloropropan-1-ol [(rac)-13a]**

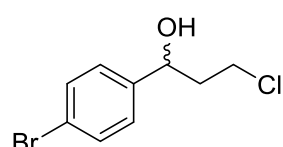

<sup>1</sup>H NMR (400 MHz, CDCl<sub>3</sub>) δ 7.48 (d, *J* = 8.4 Hz, 2H), 7.23 (d, *J* = 8.4 Hz, 2H), 4.90 (dd, *J* = 8.7, 4.7 Hz, 1H), 3.75 - 3.69 (m, 1H), 3.53 (dt, *J* = 12.6, 4.2 Hz, 1H), 2.22 - 2.13 (m, 2H), 2.07 - 1.99 (m, 1H). <sup>13</sup>C NMR (100 MHz, CDCl<sub>3</sub>) δ 142.8, 131.8, 127.6, 121.8, 70.7, 41.6, 41.4.

**(rac)-3-chloro-1-(4-(trifluoromethyl)phenyl)propan-1-ol [(rac)-14a]**

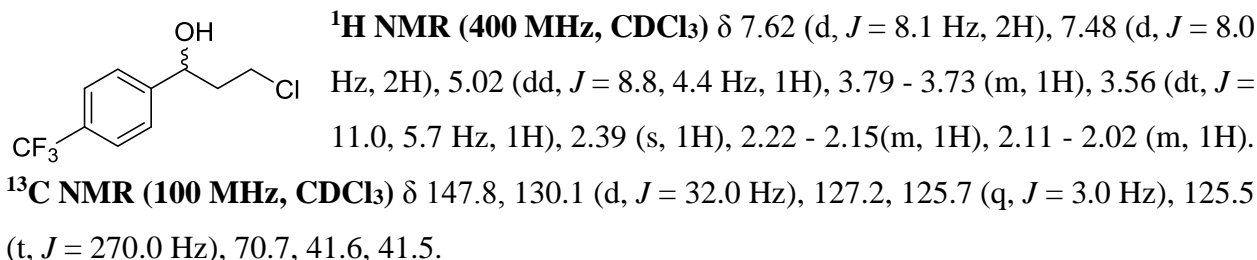

**(rac)-3-chloro-1-(3,5-difluorophenyl)propan-1-ol [(rac)-15a]**

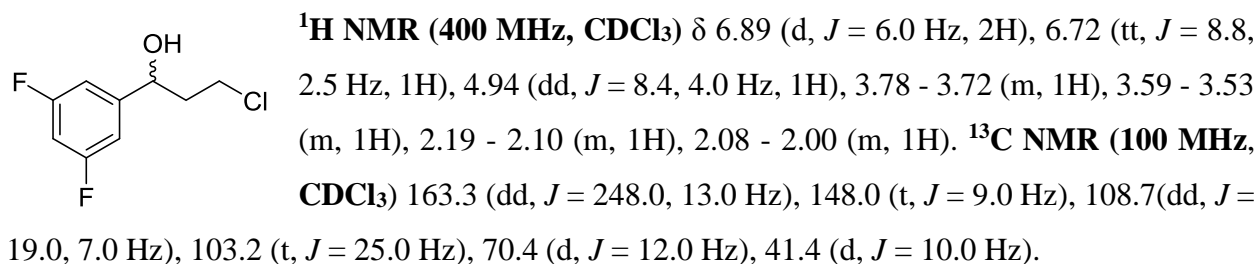

**(rac)-3-chloro-1-(naphthalen-2-yl)propan-1-ol [(rac)-16a]**

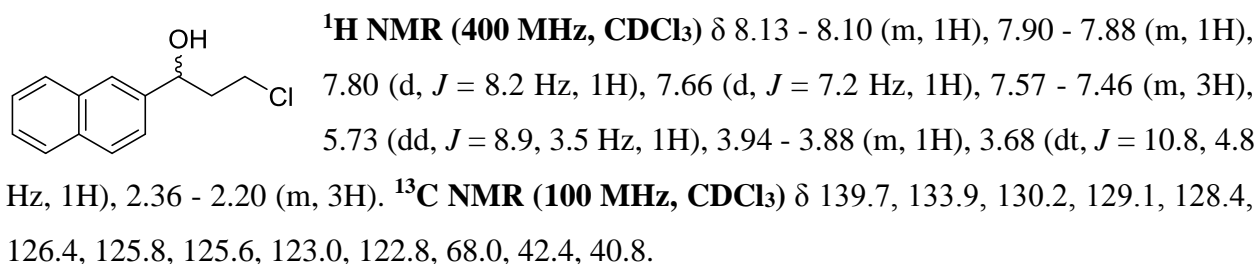

**(rac)-4-chloro-2-phenylbutan-2-ol [(rac)-17a]**

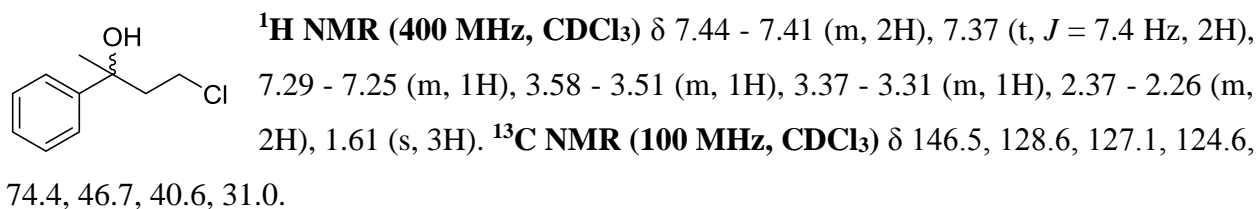

**(rac)-1-(5-bromopyridin-3-yl)-3-chloropropan-1-ol [(rac)-18a]**

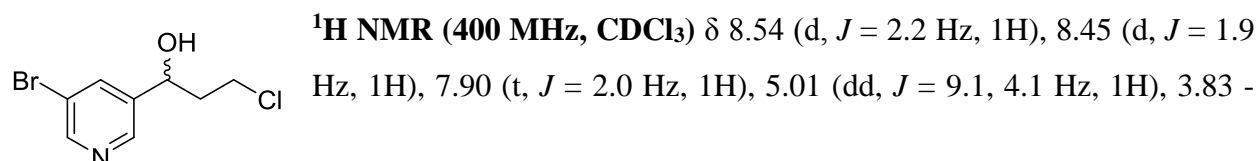



3.76 (m, 1H), 3.60 (dt,  $J = 11.1, 5.4$  Hz, 1H), 2.24 - 2.15 (m, 1H), 2.10 - 2.02 (m, 1H).  $^{13}\text{C}$  NMR (100 MHz,  $\text{CDCl}_3$ )  $\delta$  150.2, 145.7, 141.5, 136.5, 121.2, 68.1, 41.4, 41.3.

**(rac)-3-chloro-1-(quinolin-3-yl)propan-1-ol [(rac)-19a]**

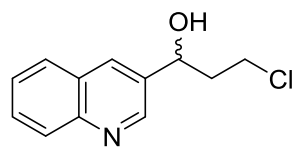 $^1\text{H}$  NMR (400 MHz,  $\text{CDCl}_3$ )  $\delta$  8.68 - 8.64 (m, 1H), 8.06 (s, 1H), 7.96 (d,  $J = 8.7$  Hz, 1H), 7.70 (d,  $J = 8.0$  Hz, 1H), 7.62 (t,  $J = 7.3$  Hz, 1H), 7.49 (t,  $J = 7.6$  Hz, 1H), 5.11 - 5.08 (m, 1H), 3.83 - 3.77 (m, 1H), 3.56 (dt,  $J = 11.3, 5.4$  Hz, 1H), 2.28 - 2.20 (m, 1H), 2.12 - 2.02 (m, 1H).  $^{13}\text{C}$  NMR (100 MHz,  $\text{CDCl}_3$ )  $\delta$  149.0, 147.2, 137.1, 133.2, 129.7, 128.6, 127.9, 127.8, 127.1, 68.7, 41.6, 41.4.

**(rac)-3-chloro-1-(thiophen-2-yl)propan-1-ol [(rac)-20a]**

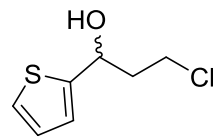 $^1\text{H}$  NMR (400 MHz,  $\text{CDCl}_3$ )  $\delta$  7.27 (dd,  $J = 5.0, 1.4$  Hz, 1H), 7.02 - 6.96 (m, 2H), 5.20 (dd,  $J = 8.5, 5.2$  Hz, 1H), 3.78 - 3.72 (m, 1H), 3.58 (dt,  $J = 10.9, 5.9$  Hz, 1H), 2.37 - 2.28 (m, 2H), 2.24 - 2.15 (m, 1H).  $^{13}\text{C}$  NMR (100 MHz,  $\text{CDCl}_3$ )  $\delta$  147.6, 126.9, 125.1, 124.3, 67.2, 41.6.

**(rac)-3-chloro-1-cyclohexylpropan-1-ol [(rac)-21a]**

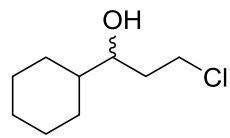 $^1\text{H}$  NMR (400 MHz,  $\text{CDCl}_3$ )  $\delta$  3.70 - 3.66 (m, 2H), 3.58 - 3.53 (m, 1H), 1.98 (s, 1H), 1.93 - 1.71 (m, 5H), 1.65 (d,  $J = 10.7$  Hz, 1H), 1.35 - 0.90 (m, 6H).  $^{13}\text{C}$  NMR (100 MHz,  $\text{CDCl}_3$ )  $\delta$  73.0, 43.8, 42.2, 36.8, 29.1, 28.0, 26.5, 26.3, 26.1.

**(rac)-3-bromo-1-phenylpropan-1-ol [(rac)-22a]**

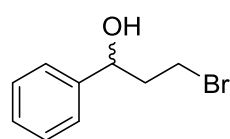 $^1\text{H}$  NMR (400 MHz,  $\text{CDCl}_3$ )  $\delta$  7.39 - 7.36 (m, 4H), 7.32 - 7.28 (m, 1H), 4.90 (dd,  $J = 8.4, 4.7$  Hz, 1H), 3.60 - 3.54 (m, 1H), 3.43 - 3.37 (m, 1H), 2.35 - 2.26 (m, 1H), 2.19 - 2.12 (m, 1H).  $^{13}\text{C}$  NMR (100 MHz,  $\text{CDCl}_3$ )  $\delta$  143.6, 128.8, 128.0, 125.9, 72.3, 41.6, 30.4.

**(rac)-3-iodo-1-phenylpropan-1-ol [(rac)-23a]**

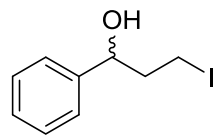 $^1\text{H}$  NMR (400 MHz,  $\text{CDCl}_3$ )  $\delta$  7.37 (d,  $J = 4.3$  Hz, 4H), 7.32 - 7.28 (m, 1H), 4.83 (dd,  $J = 8.2, 4.8$  Hz, 1H), 3.35 - 3.29 (m, 1H), 3.22 - 3.16 (m, 1H), 2.31 -

2.22 (m, 1H), 2.21 - 2.12 (m, 1H).  $^{13}\text{C}$  NMR (100 MHz,  $\text{CDCl}_3$ )  $\delta$  142.5, 130.1, 128.1, 125.4, 74.3, 42.4, 3.6.

### Synthesis of racemic oxetanes:

#### Method A

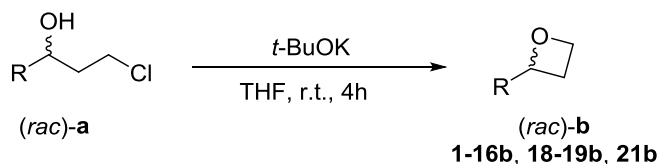

#### Method B

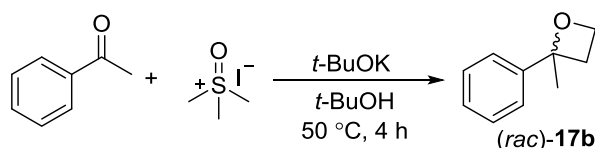

Racemic oxetanes **1-16b**, **18-19b**, and **21b** were synthesized from the corresponding  $\gamma$ -haloalcohols (Method A)<sup>21</sup>. General procedure: To a 100-mL round-bottom flask, 10 mmol of  $\gamma$ -haloalcohols (*rac*)-**a** substrates and 20 mL THF were added, followed by the addition of 3.4 g (30 mmol) of potassium tert-butoxide (*t*-BuOK). The reaction mixture was then stirred at room temperature for 4 h. Afterward, the reaction mixture was quenched with 10 mL of distilled water, extracted with ethyl acetate ( $3 \times 15$  mL), and washed with saturated brine. The organic layer was then dried over anhydrous  $\text{Na}_2\text{SO}_4$  and concentrated under reduced pressure to obtain the crude product. The resulting mixture was purified by flash chromatography (petroleum ether: ethyl acetate = 50:1 ~ 10:1) to afford the racemic oxetanes (*rac*)-**b**.

Racemic oxetane **17b** was synthesized from acetophenone (Method B)<sup>22</sup>. To a 200-mL round-bottom flask, 20 mmol of trimethylsulfoxonium iodide (4.4 g) and 20 mL of tertbutanol were added, followed by the addition of 2.2 g (20 mmol) of *t*-BuOK. The reaction mixture was then heated to 50 °C in an oil bath and stirred for 2 h. Afterwards, a solution of 10 mmol acetophenone in 10 mL tertbutanol was added dropwise to the reaction mixture. The reaction was allowed to proceed at 50 °C for 24 h. Water was added and the resulting layers were separated. The aqueous phase was extracted with hexane (thrice). The organic layers were then combined, dried over anhydrous  $\text{Na}_2\text{SO}_4$  and concentrated under reduced pressure to obtain the crude product. The resulting mixture was purified by flash chromatography (petroleum ether: ethyl acetate = 80:1) to afford the racemic oxetane (*rac*)-**17b**.

**(rac)-2-phenyloxetane [(rac)-1b]**

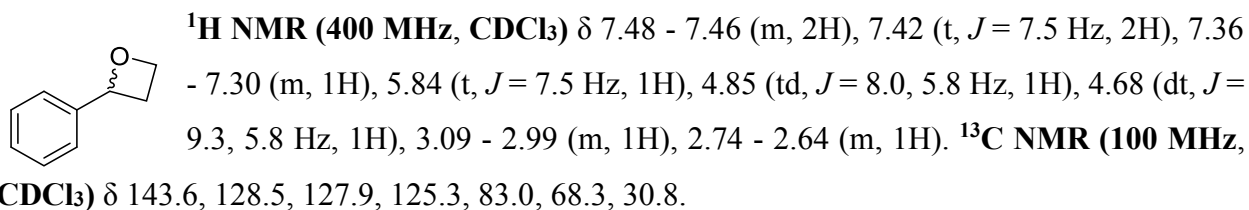

**(rac)-2-(2-fluorophenyl)oxetane [(rac)-2b]**

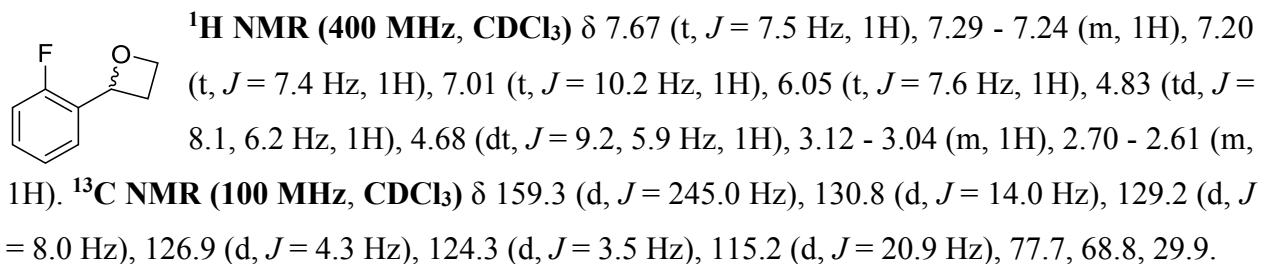

**(rac)-2-(2-chlorophenyl)oxetane [(rac)-3b]**

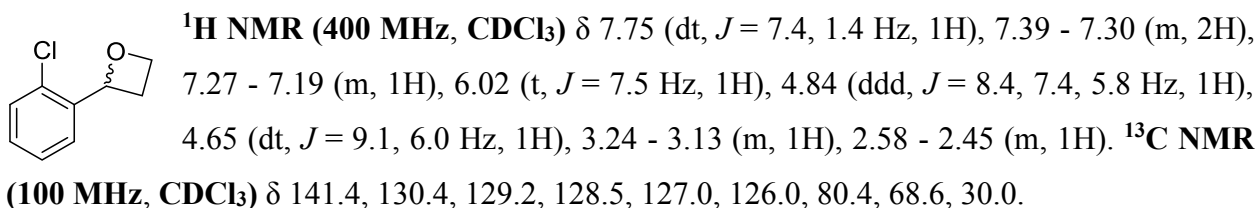

**(rac)-2-(2-bromophenyl)oxetane [(rac)-4b]**

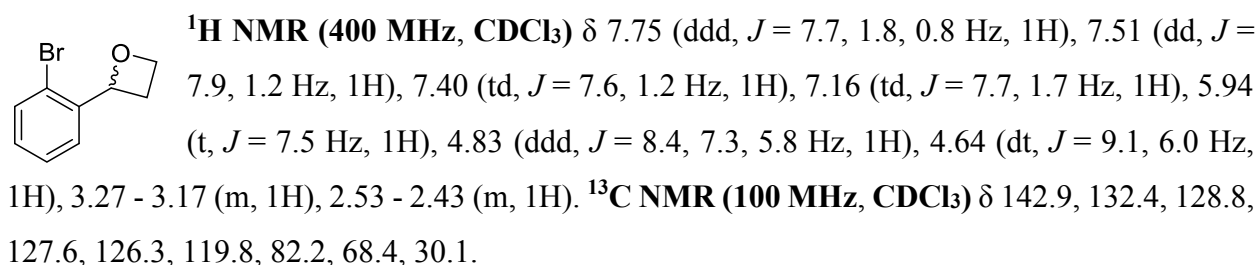

**(rac)-2-(o-tolyl)oxetane [(rac)-5b]**

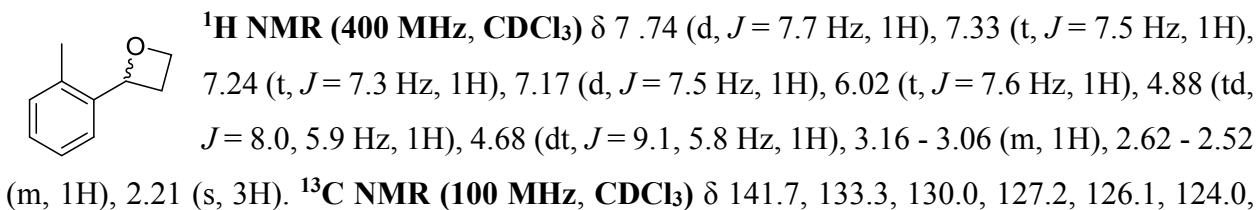

80.6, 68.1, 29.7, 18.4.

**(rac)-2-(3-fluorophenyl)oxetane [(rac)-6b]**

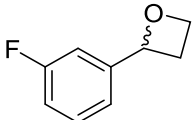  
**<sup>1</sup>H NMR (400 MHz, CDCl<sub>3</sub>)** δ 7.34 (td, *J* = 7.8, 5.7 Hz, 1H), 7.20 - 7.15 (m, 2H), 6.98 (td, *J* = 8.4, 2.5 Hz, 1H), 5.79 (t, *J* = 7.5 Hz, 1H), 4.83 (td, *J* = 8.1, 6.2 Hz, 1H), 4.66 (dt, *J* = 9.3, 5.8 Hz, 1H), 3.09 - 3.00 (m, 1H), 2.66 - 2.57 (m, 1H).  
**<sup>13</sup>C NMR (100 MHz, CDCl<sub>3</sub>)** δ 163.2 (d, *J* = 246.0 Hz), 146.5 (d, *J* = 6.8 Hz), 130.2 (d, *J* = 8.2 Hz), 120.7 (d, *J* = 2.8 Hz), 114.7 (d, *J* = 21.1 Hz), 112.2 (d, *J* = 22.1 Hz), 82.2, 68.5, 30.7.

**(rac)-2-(3-chlorophenyl)oxetane [(rac)-7b]**

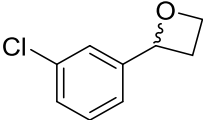  
**<sup>1</sup>H NMR (400 MHz, CDCl<sub>3</sub>)** δ 7.45 (s, 1H), 7.34 - 7.24 (m, 3H), 5.77 (t, *J* = 7.5 Hz, 1H), 4.83 (td, *J* = 8.0, 5.9 Hz, 1H), 4.66 (dt, *J* = 9.2, 5.9 Hz, 1H), 3.08 - 2.99 (m, 1H), 2.67 - 2.56 (m, 1H). **<sup>13</sup>C NMR (100 MHz, CDCl<sub>3</sub>)** δ 145.8, 134.6, 129.9, 127.9, 125.4, 123.3, 82.2, 68.5, 30.7.

**(rac)-2-(3-bromophenyl)oxetane [(rac)-8b]**

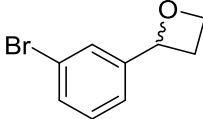  
**<sup>1</sup>H NMR (400 MHz, CDCl<sub>3</sub>)** δ 7.61 (s, 1H), 7.41 (d, *J* = 7.8 Hz, 1H), 7.32 (d, *J* = 7.7 Hz, 1H), 7.24 (t, *J* = 7.8 Hz, 1H), 5.75 (t, *J* = 7.5 Hz, 1H), 4.81 (td, *J* = 8.0, 6.0 Hz, 1H), 4.69 - 4.59 (m, 1H), 3.06 - 2.97 (m, 1H), 2.65 - 2.54 (m, 1H).  
**<sup>13</sup>C NMR (100 MHz, CDCl<sub>3</sub>)** δ 146.0, 130.7, 130.1, 128.2, 123.7, 122.7, 82.0, 68.4, 30.7.

**(rac)-2-(*m*-tolyl)oxetane [(rac)-9b]**

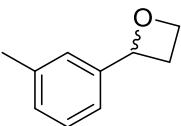  
**<sup>1</sup>H NMR (400 MHz, CDCl<sub>3</sub>)** δ 7.37 - 7.24 (m, 3H), 7.16 (d, *J* = 7.4 Hz, 1H), 5.83 (t, *J* = 7.5 Hz, 1H), 4.86 (td, *J* = 8.1, 5.9 Hz, 1H), 4.69 (dt, *J* = 9.1, 5.7 Hz, 1H), 3.08 - 2.99 (m, 1H), 2.75 - 2.65 (m, 1H), 2.43 (s, 3H). **<sup>13</sup>C NMR (100 MHz, CDCl<sub>3</sub>)** δ 143.5, 138.1, 128.5, 128.4, 125.8, 122.3, 82.9, 68.2, 30.7, 21.4.

**(rac)-2-(3-methoxyphenyl)oxetane [(rac)-10b]**

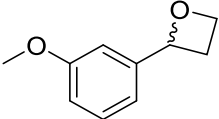  
**<sup>1</sup>H NMR (400 MHz, CDCl<sub>3</sub>)** δ 7.31 (t, *J* = 7.9 Hz, 1H), 7.05 - 6.96 (m, 2H), 6.85 (ddd, *J* = 8.2, 2.6, 1.0 Hz, 1H), 5.80 (t, *J* = 7.5 Hz, 1H), 4.83 (td, *J* = 8.0, 5.8 Hz, 1H), 4.66 (dt, *J* = 9.2, 5.8 Hz, 1H), 3.84 (s, 3H), 3.07 - 2.98 (m, 1H).

2.70 - 2.60 (m, 1H).  $^{13}\text{C}$  NMR (100 MHz,  $\text{CDCl}_3$ )  $\delta$  159.9, 145.4, 129.7, 117.4, 113.4, 110.5, 82.8, 68.4, 55.3, 30.7.

**(rac)-2-(4-fluorophenyl)oxetane [(rac)-11b]**

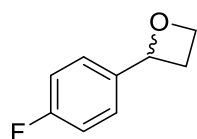

$^1\text{H}$  NMR (400 MHz,  $\text{CDCl}_3$ )  $\delta$  7.42 (dd,  $J$  = 8.4, 5.6 Hz, 2H), 7.07 (t,  $J$  = 8.5 Hz, 2H), 5.78 (t,  $J$  = 7.5 Hz, 1H), 4.81 (td,  $J$  = 8.4, 6.4 Hz, 1H), 4.63 (dt,  $J$  = 9.0, 5.7 Hz, 1H), 3.04 - 2.96 (m, 1H), 2.68 - 2.59 (m, 1H).  $^{13}\text{C}$  NMR (100 MHz,  $\text{CDCl}_3$ )  $\delta$  162.4 (d,  $J$  = 245.7 Hz), 139.4 (d,  $J$  = 3.0 Hz), 127.2 (d,  $J$  = 8.2 Hz), 115.4 (d,  $J$  = 21.5 Hz), 82.4, 68.2, 30.9.

**(rac)-2-(4-chlorophenyl)oxetane [(rac)-12b]**

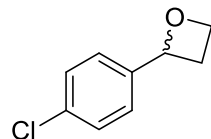

$^1\text{H}$  NMR (400 MHz,  $\text{CDCl}_3$ )  $\delta$  7.39 - 7.31 (m, 4H), 5.76 (t,  $J$  = 7.5 Hz, 1H), 4.81 (td,  $J$  = 8.0, 5.9 Hz, 1H), 4.63 (dt,  $J$  = 9.2, 5.8 Hz, 1H), 3.05 - 2.96 (m, 1H), 2.64 - 2.54 (m, 1H).  $^{13}\text{C}$  NMR (100 MHz,  $\text{CDCl}_3$ )  $\delta$  142.1, 133.4, 128.6, 126.7, 82.1, 68.2, 30.8.

**(rac)-2-(4-bromophenyl)oxetane [(rac)-13b]**

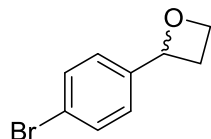

$^1\text{H}$  NMR (400 MHz,  $\text{CDCl}_3$ )  $\delta$  7.55 - 7.44 (m, 2H), 7.33 - 7.27 (m, 2H), 5.74 (t,  $J$  = 7.6 Hz, 1H), 4.80 (td,  $J$  = 8.1, 5.9 Hz, 1H), 4.62 (dt,  $J$  = 9.3, 5.8 Hz, 1H), 3.04 - 2.94 (m, 1H), 2.62 - 2.52 (m, 1H).  $^{13}\text{C}$  NMR (100 MHz,  $\text{CDCl}_3$ )  $\delta$  142.6, 131.5, 126.9, 121.5, 82.1, 68.2, 30.6.

**(rac)-2-(4-(trifluoromethyl)phenyl)oxetane [(rac)-14b]**

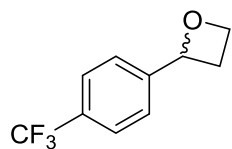

$^1\text{H}$  NMR (400 MHz,  $\text{CDCl}_3$ )  $\delta$  7.64 (d,  $J$  = 8.0 Hz, 2H), 7.53 (d,  $J$  = 8.1 Hz, 2H), 5.85 (t,  $J$  = 7.6 Hz, 1H), 4.84 (td,  $J$  = 8.0, 6.0 Hz, 1H), 4.66 (dt,  $J$  = 9.2, 5.9 Hz, 1H), 3.11 - 3.02 (m, 1H), 2.64 - 2.55 (m, 1H).  $^{13}\text{C}$  NMR (100 MHz,  $\text{CDCl}_3$ )  $\delta$  147.8, 129.9 (q,  $J$  = 32.0 Hz), 125.6 (q,  $J$  = 3.0 Hz), 125.4, 124.2 (q,  $J$  = 270.0 Hz), 82.5, 68.6, 30.7.

**(rac)-2-(3,5-difluorophenyl)oxetane [(rac)-15b]**

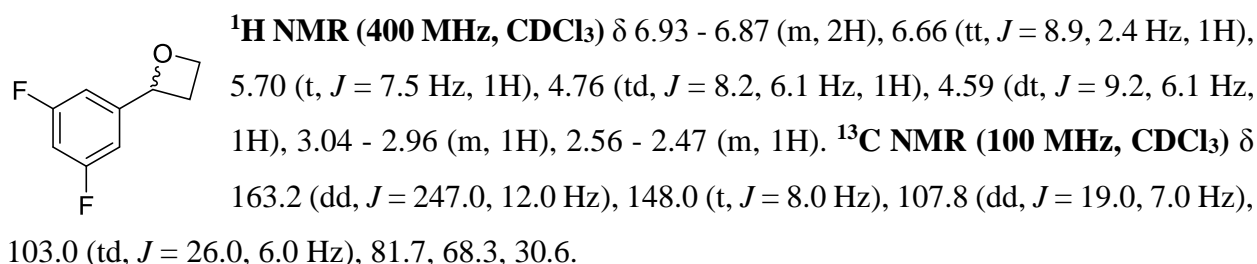

**(rac)-2-(naphthalen-2-yl)oxetane [(rac)-16b]**

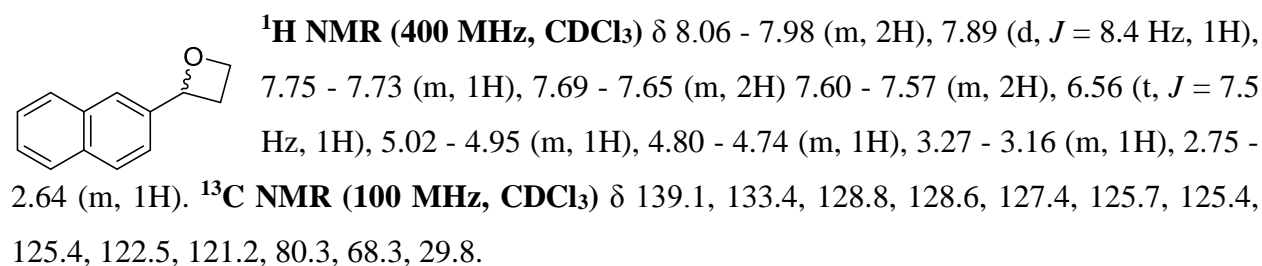

**(rac)-2-methyl-2-phenyloxetane [(rac)-17b]**

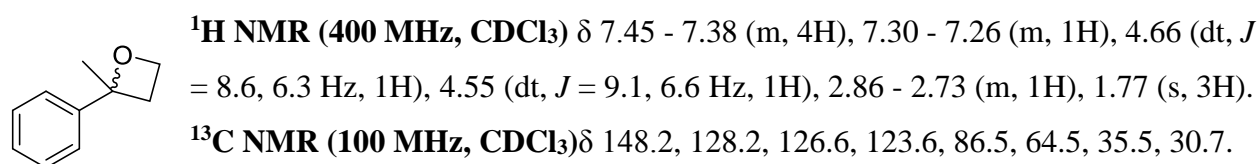

**(rac)-3-bromo-5-(oxetan-2-yl)pyridine [(rac)-18b]**

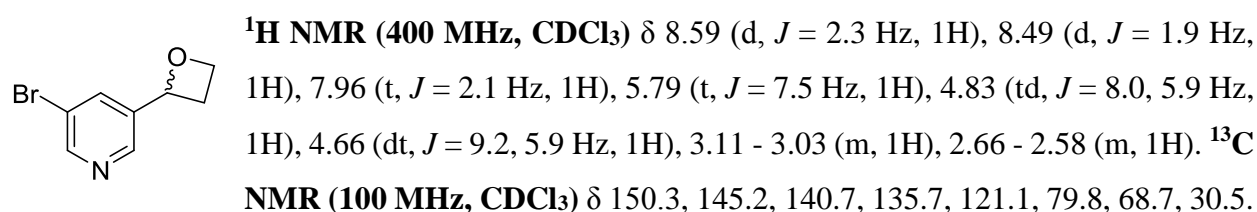

**(rac)-3-(oxetan-2-yl)quinoline [(rac)-19b]**

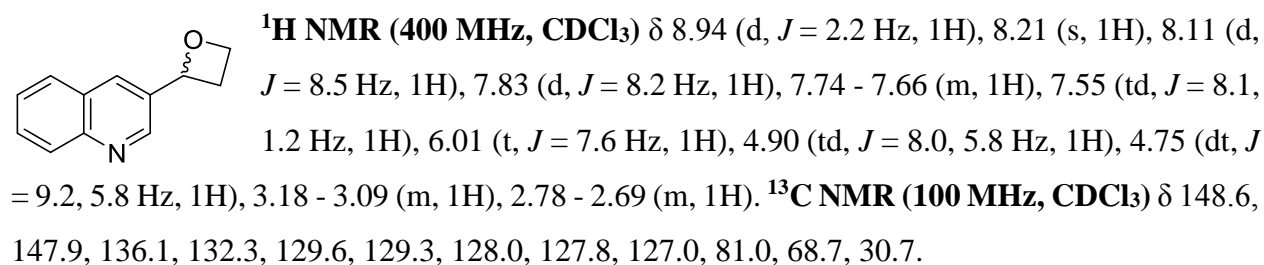

**(rac)-2-cyclohexyloxetane [(rac)-21b]**

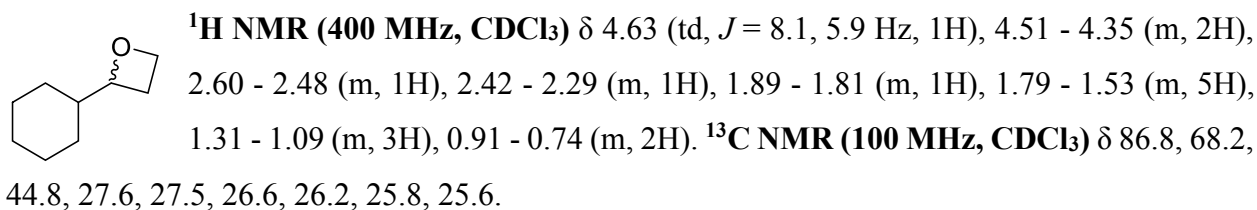

**Synthesis of racemic  $\gamma$ -azidoalcohols<sup>23</sup>:**

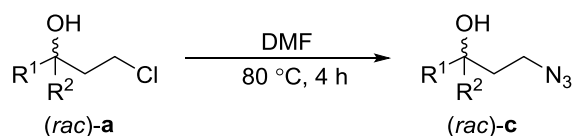

General procedure: To a 10-mL round-bottom flask, 1.0 mmol of racemic  $\gamma$ -haloalcohol substrates (rac)-a and 2 mL of *N,N*-dimethylformamide (DMF) were added, followed by the addition of 4.0 mmol 260.0 mg (4.0 mmol) NaN<sub>3</sub>. The reaction mixture was then stirred at room temperature for 15 min. The temperature was then gradually raised to 80 °C and the reaction was allowed to proceed for 4 h. Afterward, the reaction mixture was quenched with 10 mL of distilled water, extracted with ethyl acetate (3  $\times$  5 mL), and washed with distilled water (twice) and saturated NH<sub>4</sub>Cl solution (thrice). The organic layer was then dried over anhydrous Na<sub>2</sub>SO<sub>4</sub> and concentrated under reduced pressure to obtain the crude product. The resulting mixture was purified by flash chromatography (petroleum ether: ethyl acetate = 10:1 ~ 3:1) to afford the racemic  $\gamma$ -azidoalcohols (rac)-c.

**(rac)-3-azido-1-phenylpropan-1-ol [(rac)-1c]**

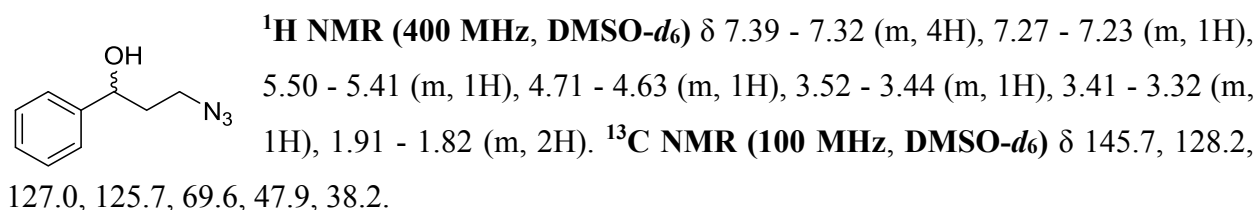

**(rac)-3-azido-1-(2-fluorophenyl)propan-1-ol [(rac)-2c]**

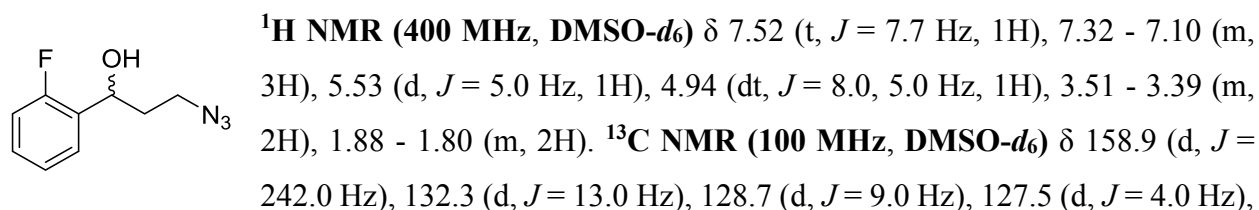

124.4 (d,  $J = 4.0$  Hz), 115.0 (d,  $J = 21.0$  Hz), 63.2, 47.6, 36.9.

**(rac)-3-azido-1-(2-chlorophenyl)propan-1-ol [(rac)-3c]**

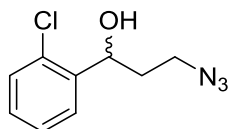

$^1\text{H}$  NMR (400 MHz, DMSO- $d_6$ )  $\delta$  7.61 (d,  $J = 7.7$  Hz, 1H), 7.39 - 7.34 (m, 2H), 7.29 - 7.24 (m, 1H), 5.61 (d,  $J = 4.3$  Hz, 1H), 5.01 (dd,  $J = 8.6, 3.9$  Hz, 1H), 3.49 - 3.46 (m, 2H), 1.93 - 1.85 (m, 1H), 1.73 - 1.64 (m, 1H).  $^{13}\text{C}$  NMR (100 MHz, DMSO- $d_6$ )  $\delta$  142.9, 130.4, 129.0, 128.5, 127.5, 127.3, 66.0, 47.6, 36.5.

**(rac)-3-azido-1-(2-bromophenyl)propan-1-ol [(rac)-4c]**

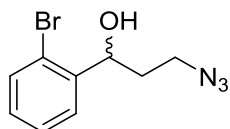

$^1\text{H}$  NMR (400 MHz, DMSO- $d_6$ )  $\delta$  7.60 (dd,  $J = 7.8, 1.8$  Hz, 1H), 7.55 (dd,  $J = 8.0, 1.3$  Hz, 1H), 7.40 (t,  $J = 7.5$  Hz, 1H), 7.19 (td,  $J = 7.6, 1.9$  Hz, 1H), 5.65 (d,  $J = 4.6$  Hz, 1H), 5.00 - 4.90 (m, 1H), 3.54 - 3.43 (m, 2H), 1.96 - 1.83 (m, 1H), 1.72 - 1.59 (m, 1H).  $^{13}\text{C}$  NMR (100 MHz, DMSO- $d_6$ )  $\delta$  144.5, 132.2, 128.9, 127.9, 127.7, 120.8, 68.3, 47.7, 36.6.

**(rac)-3-azido-1-(o-tolyl)propan-1-ol [(rac)-5c]**

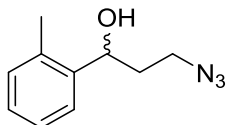

$^1\text{H}$  NMR (400 MHz, DMSO- $d_6$ )  $\delta$  7.45 (d,  $J = 7.6$  Hz, 1H), 7.21 - 7.10 (m, 3H), 5.31 - 5.29 (m, 1H), 4.85 - 4.83 (m, 1H), 3.52 - 3.40 (m, 2H), 2.28 (s, 3H), 1.83 - 1.67 (m, 2H).  $^{13}\text{C}$  NMR (100 MHz, DMSO- $d_6$ )  $\delta$  143.7, 133.6, 130.0, 126.6, 125.9, 125.3, 65.9, 48.0, 36.9, 18.5.

**(rac)-3-azido-1-(3-fluorophenyl)propan-1-ol [(rac)-6c]**

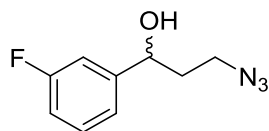

$^1\text{H}$  NMR (400 MHz, DMSO- $d_6$ )  $\delta$  7.39 - 7.33 (m, 1H), 7.18 - 7.14 (m, 2H), 7.05 (t,  $J = 8.6$  Hz, 1H), 5.54 (dd,  $J = 4.7, 1.6$  Hz, 1H), 4.66 (dt,  $J = 8.0, 5.0$  Hz, 1H), 3.48 - 3.41 (m, 1H), 3.39 - 3.32 (m, 1H), 1.88 - 1.78 (m, 2H).  $^{13}\text{C}$  NMR (100 MHz, DMSO- $d_6$ )  $\delta$  162.3 (d,  $J = 242.0$  Hz), 148.8 (d,  $J = 6.0$  Hz), 130.1 (d,  $J = 8.2$  Hz), 121.7 (d,  $J = 2.6$  Hz), 113.6 (d,  $J = 21.0$  Hz), 112.3 (d,  $J = 21.6$  Hz), 68.9, 47.7, 37.9.



**(rac)-3-azido-1-(3-chlorophenyl)propan-1-ol [(rac)-7c]**

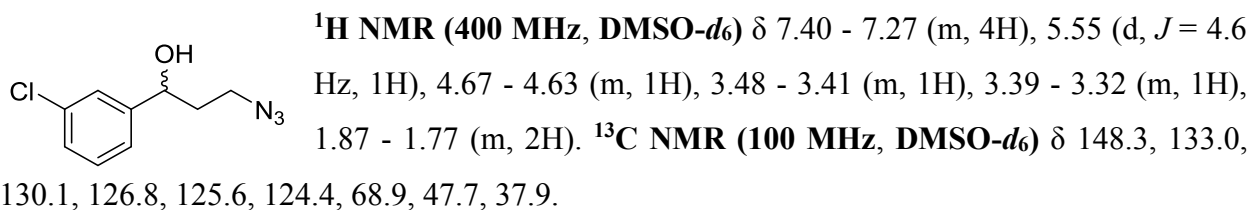

**(rac)-3-azido-1-(3-bromophenyl)propan-1-ol [(rac)-8c]**

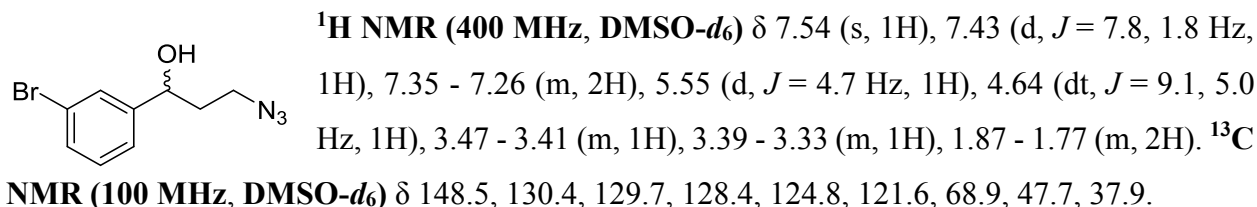

**(rac)-3-azido-1-(*m*-tolyl)propan-1-ol [(rac)-9c]**

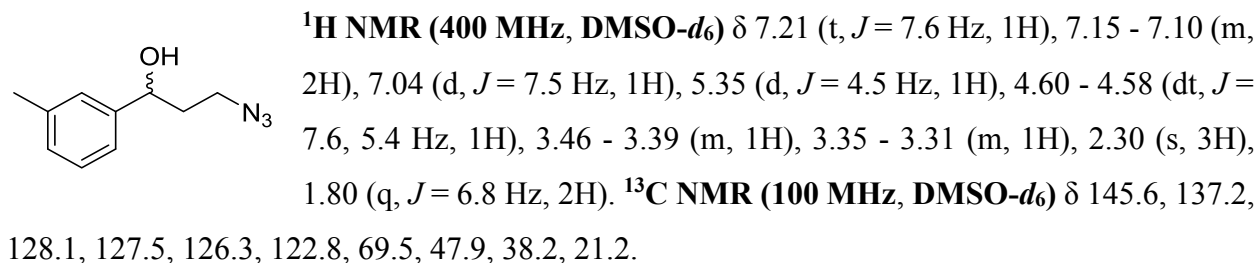

**(rac)-3-azido-1-(3-methoxyphenyl)propan-1-ol [(rac)-10c]**

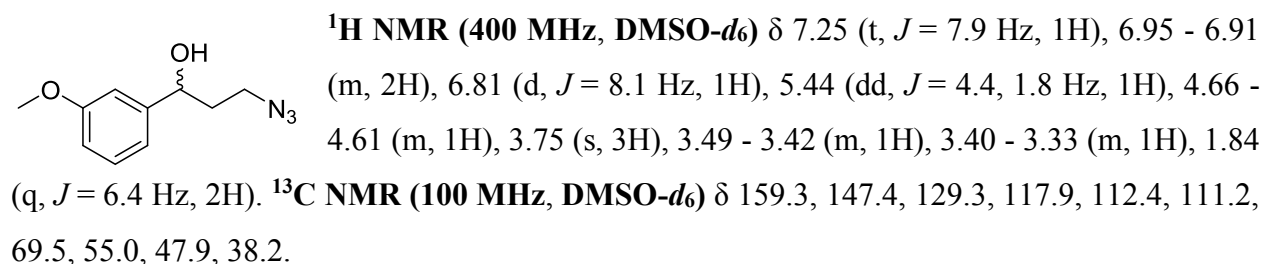

**(rac)-3-azido-1-(4-fluorophenyl)propan-1-ol [(rac)-11c]**

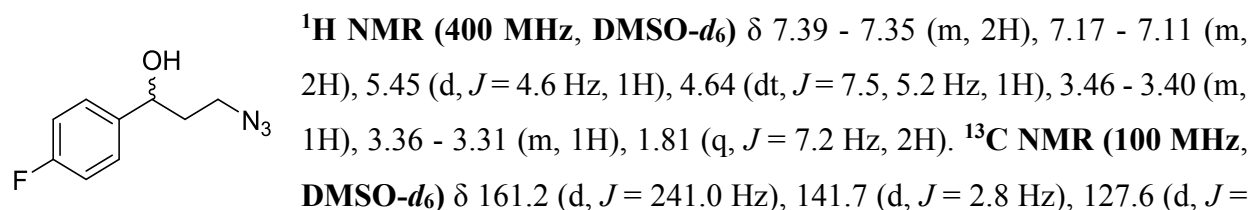

8.0 Hz), 114.8 (d,  $J = 21.0$  Hz), 68.9, 47.8, 38.1.

**(rac)-3-azido-1-(4-chlorophenyl)propan-1-ol [(rac)-12c]**

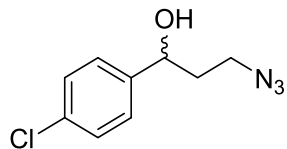

**$^1\text{H}$  NMR (400 MHz, DMSO- $d_6$ )**  $\delta$  7.39 - 7.35 (m, 4H), 5.52 (d,  $J = 4.6$  Hz, 1H), 4.65 (td,  $J = 8.2, 4.9$  Hz, 1H), 3.47 - 3.41 (m, 1H), 3.38 - 3.32 (m, 1H), 1.81 (q,  $J = 6.8$  Hz, 2H).  **$^{13}\text{C}$  NMR (100 MHz, DMSO- $d_6$ )**  $\delta$  144.6, 131.4, 128.1, 127.6, 68.9, 47.7, 38.0.

**(rac)-3-azido-1-(4-bromophenyl)propan-1-ol [(rac)-13c]**

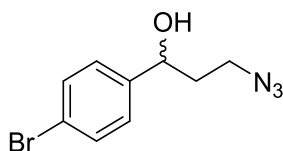

**$^1\text{H}$  NMR (400 MHz, DMSO- $d_6$ )**  $\delta$  7.51 (d,  $J = 8.4$  Hz, 2H), 7.30 (d,  $J = 8.4$  Hz, 2H), 5.51 (d,  $J = 4.7$  Hz, 1H), 4.62 (dt,  $J = 6.8, 6.1$  Hz, 1H), 3.47 - 3.40 (m, 1H), 3.39 - 3.32 (m, 1H), 1.80 (q,  $J = 6.8$  Hz, 2H).  **$^{13}\text{C}$  NMR (100 MHz, DMSO- $d_6$ )**  $\delta$  145.0, 131.0, 128.0, 119.9, 68.9, 47.7, 38.0.

**(rac)-3-azido-1-(4-(trifluoromethyl)phenyl)propan-1-ol [(rac)-14c]**

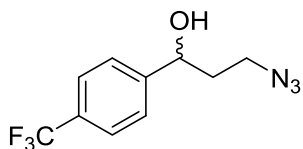

**$^1\text{H}$  NMR (400 MHz, DMSO- $d_6$ )**  $\delta$  7.67 (d,  $J = 8.0$  Hz, 2H), 7.58 (d,  $J = 8.1$  Hz, 2H), 5.69 (d,  $J = 4.6$  Hz, 1H), 4.78 (dt,  $J = 8.0, 5.1$  Hz, 1H), 3.52 - 3.46 (m, 1H), 3.42 - 3.36 (m, 1H), 1.91 - 1.81 (m, 2H).  **$^{13}\text{C}$  NMR (100 MHz, DMSO- $d_6$ )**  $\delta$  150.5, 127.9 (q,  $J = 31.0$  Hz), 126.6 - 126.4 (m), 125.2 - 125.0 (m), 124.5 (q,  $J = 270.0$  Hz), 69.2, 47.8, 38.1.

**(rac)-3-azido-1-(3,5-difluorophenyl)propan-1-ol [(rac)-15c]**

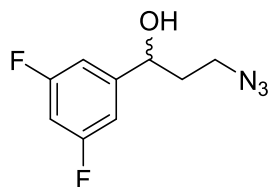

**$^1\text{H}$  NMR (400 MHz, DMSO- $d_6$ )**  $\delta$  7.09 - 7.04 (m, 3H), 5.66 (d,  $J = 4.9$  Hz, 1H), 4.67 (dt,  $J = 8.7, 4.6$  Hz, 1H), 3.47 - 3.42 (m, 1H), 3.40 - 3.37 (m, 1H), 1.90 - 1.74 (m, 2H).  **$^{13}\text{C}$  NMR (100 MHz, DMSO- $d_6$ )**  $\delta$  163.7 (d,  $J = 12.9$  Hz), 161.2 (d,  $J = 13.0$  Hz), 150.7 (t,  $J = 8.2$  Hz), 108.8 (dd,  $J = 25.0, 7.0$  Hz), 102.2 (t,  $J = 25.7$  Hz), 68.7, 47.7, 37.7.

**(rac)-3-azido-1-(naphthalen-2-yl)propan-1-ol [(rac)-16c]**

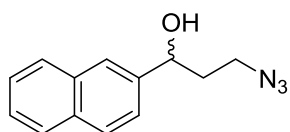

**$^1\text{H}$  NMR (400 MHz, DMSO- $d_6$ )**  $\delta$  8.19 - 8.13 (m, 1H), 7.95 - 7.68 (m, 3H), 7.58 - 7.48 (m, 3H), 5.67 - 5.60 (m, 1H), 5.49 - 5.41 (m, 1H), 3.70 -

3.59 (m, 1H), 3.46 - 3.41 (m, 1H), 2.09 - 1.85 (m, 2H).  $^{13}\text{C}$  NMR (100 MHz, DMSO- $d_6$ )  $\delta$  141.3, 133.4, 129.8, 128.8, 127.3, 126.0, 125.5, 123.2, 122.9, 66.4, 48.2, 37.7.

**(rac)-4-azido-2-phenylbutan-2-ol [(rac)-17c]**

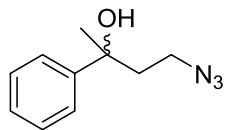

$^1\text{H}$  NMR (400 MHz, DMSO- $d_6$ )  $\delta$  7.46 - 7.44 (m, 2H), 7.31 (t,  $J$  = 7.4 Hz, 2H), 7.21 - 7.19 (m, 1H), 5.20 (s, 1H), 3.36 - 3.28 (m, 1H), 3.04 - 2.97 (m, 1H), 2.03 - 1.98 (m, 2H), 1.46 (s, 3H).  $^{13}\text{C}$  NMR (100 MHz, DMSO- $d_6$ )  $\delta$  148.3, 127.9, 126.2, 124.8, 71.8, 46.9, 42.1, 30.5.

**(rac)-3-azido-1-(5-bromopyridin-3-yl)propan-1-ol [(rac)-18c]**

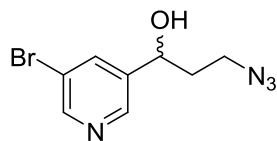

$^1\text{H}$  NMR (400 MHz, DMSO- $d_6$ )  $\delta$  8.56 (dd,  $J$  = 16.0, 2.3 Hz, 2H), 8.00 (t,  $J$  = 2.1 Hz, 1H), 5.72 (d,  $J$  = 4.8 Hz, 1H), 4.72 (dt,  $J$  = 7.9, 5.0 Hz, 1H), 3.50 - 3.45 (m, 1H), 3.43 - 3.38 (m, 1H), 1.90 - 1.85 (m, 2H).  $^{13}\text{C}$  NMR (100 MHz, DMSO- $d_6$ )  $\delta$  148.9, 146.2, 143.1, 136.0, 120.2, 67.0, 47.6, 37.5.

**(rac)-3-azido-1-(quinolin-3-yl)propan-1-ol [(rac)-19c]**

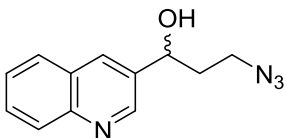

$^1\text{H}$  NMR (400 MHz, DMSO- $d_6$ )  $\delta$  8.95 (d,  $J$  = 2.2 Hz, 1H), 8.28 (d,  $J$  = 2.2 Hz, 1H), 8.03 (d,  $J$  = 8.4 Hz, 1H), 7.97 (dd,  $J$  = 8.2, 1.5 Hz, 1H), 7.71 (ddd,  $J$  = 8.4, 6.8, 1.5 Hz, 1H), 7.58 (ddd,  $J$  = 8.1, 6.8, 1.2 Hz, 1H), 5.80 (d,  $J$  = 4.6 Hz, 1H), 4.93 (dd,  $J$  = 11.2, 6.8 Hz, 1H), 3.58 - 3.50 (m, 1H), 3.47 - 3.41 (m, 1H), 2.00 (q,  $J$  = 6.7 Hz, 2H).  $^{13}\text{C}$  NMR (100 MHz, DMSO- $d_6$ )  $\delta$  149.7, 147.0, 138.1, 132.1, 129.1, 128.7, 128.1, 127.5, 126.7, 67.8, 47.7, 37.6.

**(rac) 3-azido-1-cyclohexylpropan-1-ol [(rac)-21c]**

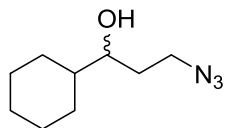

$^1\text{H}$  NMR (400 MHz, DMSO- $d_6$ )  $\delta$  4.47 (d,  $J$  = 5.9 Hz, 1H), 3.47 - 3.39 (m, 1H), 3.39 - 3.31 (m, 1H), 3.28 - 3.20 (m, 1H), 1.80 - 1.55 (m, 6H), 1.54 - 1.43 (m, 1H), 1.26 - 1.08 (m, 4H), 1.07 - 0.88 (m, 2H).  $^{13}\text{C}$  NMR (100 MHz, DMSO- $d_6$ )  $\delta$  71.1, 48.2, 43.6, 32.8, 28.8, 27.8, 26.3, 26.0, 25.9.

### Synthesis of racemic $\gamma$ -cyanohydrin<sup>24</sup>:

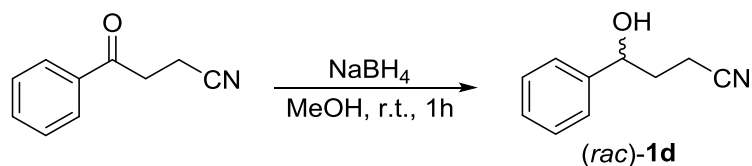

To a 10-mL round-bottom flask, 159.2 mg (1.0 mmol) of 4-oxo-4-phenylbutanenitrile and 2 mL of methanol were added. The flask was cooled to 0 °C, followed by the addition of 45.4 mg (1.2 mmol) of NaBH<sub>4</sub>. The reaction mixture was then stirred at room temperature for 1 h. Afterward, the methanol solvent was removed under reduced pressure, followed by the addition of 5 mL distilled water to the flask. The mixture was then extracted with ethyl acetate (3×5 mL) and saturated brine (twice). The organic layer was then dried over anhydrous Na<sub>2</sub>SO<sub>4</sub> and concentrated under reduced pressure to obtain the crude product. The resulting mixture was purified by flash chromatography (petroleum ether: ethyl acetate = 2:1) to afford the racemic  $\gamma$ -cyanohydrin (*rac*)-**1d**.

### (*rac*)-4-hydroxy-4-phenylbutanenitrile [(*rac*)-1d]

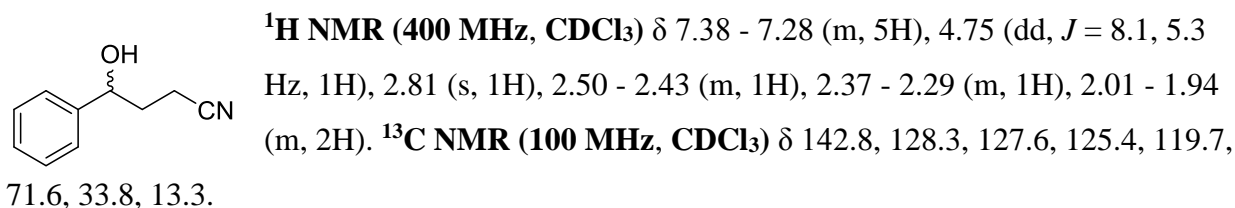

### Synthesis of racemic $\gamma$ -nitroalcohol<sup>25</sup>:

#### Step 1

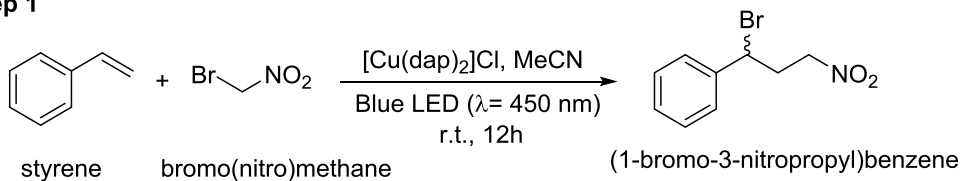

#### Step 2

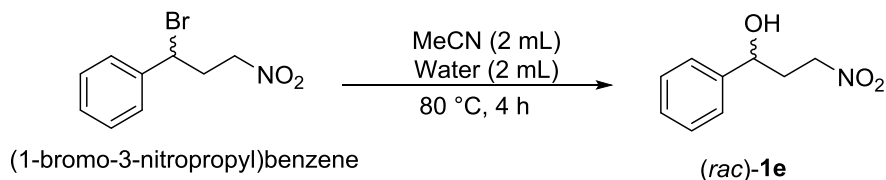

To a 10-mL round-bottom flask equipped with a magnetic stirring bar was charged with  $[\text{Cu}(\text{dap})_2]\text{Cl}$  (4.4 mg, 1 mol%, 0.01 equiv). Then dry MeCN (2 mL) was added under positive nitrogen atmosphere. Then 36  $\mu\text{L}$  (0.5 mmol) of bromo(nitro)methane and 58  $\mu\text{L}$  (0.5 mmol) styrene were added under nitrogen atmosphere. A Teflon sealed inlet for a glass rod was placed on the reaction tube, through which irradiation with LED<sub>450 nm</sub> took place from above. The mixture was stirred in an aluminum block at room temperature for 12 h. Afterward, the reaction mixture was concentrated under reduced pressure to obtain the crude product. The resulting mixture was purified by flash chromatography (petroleum ether: ethyl acetate = 5:1) to afford the intermediate (1-bromo-3-nitropropyl)benzene. Then a 25-mL pressure tube equipped with a magnetic stirring bar was charged with 122.0 mg (0.50 mmol) of (1-bromo-3-nitropropyl)benzene and a mixture of MeCN and water (1:1, 4.0 mL) was added. The reaction mixture was then refluxed at 80 °C for 4 h. Afterward, the reaction mixture was concentrated under reduced pressure to obtain the crude product. The resulting mixture was purified by flash chromatography (petroleum ether: ethyl acetate = 2:1) to afford racemic  $\gamma$ -nitroalcohol (*rac*)-**1e**.

**(*rac*)-3-nitro-1-phenylpropan-1-ol [(*rac*)-**1e**]**

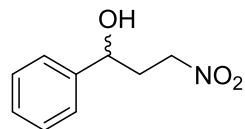

71.0, 35.8.

**<sup>1</sup>H NMR (400 MHz, CDCl<sub>3</sub>)**  $\delta$  7.38 - 7.26 (m, 6H), 4.74 (dd,  $J$  = 8.3, 4.6 Hz, 1H), 4.54 - 4.48 (m, 1H), 4.41 - 4.36 (m, 1H), 3.42 (s, 1H), 2.37 - 2.27 (m, 2H). **<sup>13</sup>C NMR (100 MHz, CDCl<sub>3</sub>)**  $\delta$  142.8, 128.8, 128.2, 125.6, 72.3,

## 5. Biocatalytic enantioselective formation of oxetanes

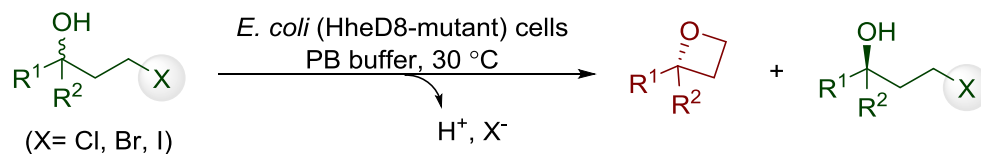

**General procedure:** In a 200 mL round-bottom flask, a resting cell suspension of *E. coli* (HheD8-M4) at a concentration of 10 g dcw/L was prepared in 100 mL of PB buffer (50 mM, pH 8.5). To this suspension, 2 mmol of  $\gamma$ -haloalcohol (*rac*)-**a** was added to a final concentration of 20 mM. The reaction mixture was then stirred at 30 °C. Upon completion of the enzymatic reaction, the mixture was subjected to extraction using ethyl acetate (3  $\times$  70 mL). The organic phases were separated by centrifugation (8800  $\times$  g, 3 min), combined, dried over anhydrous Na<sub>2</sub>SO<sub>4</sub>, and evaporated at reduced pressure. The resulting mixture was purified by flash chromatography (petroleum ether: ethyl acetate = 50:1 ~ 20:1; dichloromethane: ethyl acetate = 6:1 ~ 3:1) on silica gel to afford the desired chiral oxetane (*R*)-**b** and  $\gamma$ -haloalcohol (*S*)-**a**.

### (*S*)-3-chloro-1-phenylpropan-1-ol [(*S*)-**1a**]

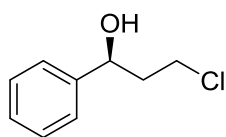

Prepared according to the general procedure: 100 mL PB buffer (50 mM, pH 8.5) containing 20 mM **1a** (2 mmol) and 10 g dcw/L *E. coli* (HheD8-M4) cells, 30 °C, reaction for 8 h. The crude product was purified by flash column chromatography on silica gel (petroleum ether: ethyl acetate = 40:1 ~ 20:1) to provide (*S*)-**1a** as a white solid in 50% yield (179.6 mg). <sup>1</sup>H NMR (400 MHz, CDCl<sub>3</sub>)  $\delta$  7.39 - 7.34 (m, 4H), 7.32 - 7.28 (m, 1H), 4.91 (dd, *J* = 8.5, 4.7 Hz, 1H), 3.75 - 3.69 (m, 1H), 3.54 (dt, *J* = 10.9, 5.9 Hz, 1H), 2.35 - 2.16 (m, 2H), 2.11 - 2.03 (m, 1H). <sup>13</sup>C NMR (100 MHz, CDCl<sub>3</sub>)  $\delta$  143.8, 128.7, 128.0, 125.9, 71.3, 41.8, 41.5. [ $\alpha$ ]<sub>D</sub><sup>25</sup> = -31.7 (*c* = 1.00, CH<sub>2</sub>Cl<sub>2</sub>). HPLC analysis (OX-3, 1% IPA in *n*-hexane, 0.5 ml/min,  $\lambda$  = 210 nm) indicated >99% *ee*: *t*<sub>(S)</sub> (major) = 44.8 min, *t*<sub>(R)</sub> (minor) = 48.7 min. HRMS (ESI) *m/z*: calculated for C<sub>9</sub>H<sub>12</sub>ClO [M+H]<sup>+</sup>: 171.0577, found: 171.0574. **m.p.**: 51.4-52.4 °C.

### (*R*)-2-phenyloxetane [(*R*)-**1b**]

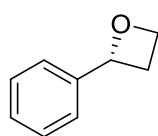

Prepared according to the general procedure: 100 mL PB buffer (50 mM, pH 8.5) containing 20 mM **1a** (2 mmol) and 10 g dcw/L *E. coli* (HheD8-M4) cells, 30 °C, reaction for 8 h. The crude product was purified by flash column chromatography

on silica gel (petroleum ether: ethyl acetate = 50:1 ~ 40:1) to provide **(R)-1b** as a light yellow liquid in 41% yield (117.0 mg). **<sup>1</sup>H NMR (400 MHz, CDCl<sub>3</sub>)** δ 7.48 - 7.45 (m, 2H), 7.41 (t, *J* = 7.2 Hz, 2H), 7.34 - 7.30 (m, 1H), 5.83 (t, *J* = 7.5 Hz, 1H), 4.85 (td, *J* = 8.0, 5.8 Hz, 1H), 4.68 (dt, *J* = 9.2, 5.8 Hz, 1H), 3.08 - 2.99 (m, 1H), 2.72 - 2.64 (m, 1H). **<sup>13</sup>C NMR (100 MHz, CDCl<sub>3</sub>)** δ 143.6, 128.6, 127.9, 125.3, 83.0, 68.4, 30.8. **[α]<sub>D</sub><sup>25</sup>** = + 174.91 (c = 1.00, CH<sub>2</sub>Cl<sub>2</sub>). **HPLC analysis** (OX-3, 3% IPA in *n*-hexane, 0.7 ml/min, λ = 210 nm) indicated 98% *ee*: *t*<sub>(S)</sub> (minor) = 10.1 min, *t*<sub>(R)</sub> (major) = 11.3 min. **HRMS (ESI) *m/z***: calculated for C<sub>9</sub>H<sub>10</sub>NaO [M+Na]<sup>+</sup>: 157.0629, found: 157.0634.

### **(S)-3-chloro-1-(2-fluorophenyl)propan-1-ol [(S)-2a]**

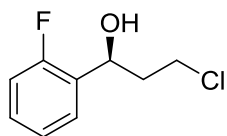

Prepared according to the general procedure: 100 mL PB buffer (50 mM, pH 8.5) containing 20 mM **2a** (2 mmol) and 10 g dcw/L *E. coli* (HheD8-M4) cells, 30 °C, reaction for 6 h. The crude product was purified by flash column chromatography on silica gel (petroleum ether: ethyl acetate = 40:1 ~ 20:1) to provide **(S)-2a** as a light yellow liquid in 49% yield (184.8 mg). **<sup>1</sup>H NMR (400 MHz, CDCl<sub>3</sub>)** δ 7.45 (t, *J* = 7.5 Hz, 1H), 7.27 (q, *J* = 5.8 Hz, 1H), 7.16 (t, *J* = 7.5 Hz, 1H), 7.03 (t, *J* = 11.1 Hz, 1H), 5.22 (dd, *J* = 8.6, 4.4 Hz, 1H), 3.78 - 3.71 (m, 1H), 3.61 (dt, *J* = 11.0, 5.9 Hz, 1H), 2.27 - 2.14 (m, 3H). **<sup>13</sup>C NMR (100 MHz, CDCl<sub>3</sub>)** δ 159.8 (d, *J* = 245.0 Hz), 130.6 (d, *J* = 13.0 Hz), 129.4 (d, *J* = 8.0 Hz), 127.4 (d, *J* = 5.0 Hz), 124.6 (d, *J* = 3.0 Hz), 115.6 (d, *J* = 22.0 Hz), 65.9 (d, *J* = 3.0 Hz), 41.6, 40.2. **[α]<sub>D</sub><sup>25</sup>** = - 35.44 (c = 1.00, CH<sub>2</sub>Cl<sub>2</sub>). **HPLC analysis** (OD-H, 10% IPA in *n*-hexane, 1.0 ml/min, λ = 210 nm) indicated 98% *ee*: *t*<sub>(S)</sub> (major) = 5.7 min, *t*<sub>(R)</sub> (minor) = 6.4 min. **HRMS (ESI) *m/z***: calculated for C<sub>9</sub>H<sub>10</sub>ClFNaO [M+Na]<sup>+</sup>: 211.0302, found: 211.0307.

### **(R)-2-(2-fluorophenyl) oxetane [(R)-2b]**

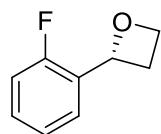

Prepared according to the general procedure: 100 mL PB buffer (50 mM, pH 8.5) containing 20 mM **2a** (2 mmol) and 10 g dcw/L *E. coli* (HheD8-M4) cells, 30 °C, reaction for 6 h. The crude product was purified by flash column chromatography on silica gel (petroleum ether: ethyl acetate = 50:1 ~ 40:1) to provide **(R)-2b** as a light yellow liquid in 39% yield (118.4 mg). **<sup>1</sup>H NMR (400 MHz, CDCl<sub>3</sub>)** δ 7.66 (t, *J* = 7.5 Hz, 1H), 7.30 - 7.24 (m, 1H), 7.20 (t, *J* = 7.5 Hz, 1H), 6.05 (t, *J* = 7.6 Hz, 1H), 4.84 (td, *J* = 8.2, 6.3 Hz, 1H), 4.68 (dt, *J* = 9.2, 6.0 Hz, 1H), 3.13 - 3.05 (m, 1H), 2.70 - 2.61 (m, 1H). **<sup>13</sup>C NMR (100 MHz, CDCl<sub>3</sub>)**

$\delta$  159.3 (d,  $J$  = 244.0 Hz), 130.8 (d,  $J$  = 13.0 Hz), 129.2 (d,  $J$  = 8.0 Hz), 127.0 (d,  $J$  = 4.0 Hz), 124.3 (d,  $J$  = 4.0 Hz), 115.2 (d,  $J$  = 20.0 Hz), 77.8 (d,  $J$  = 4.0 Hz), 76.8, 30.0.  $[\alpha]_D^{25}$  = + 148.42 ( $c$  = 1.00, CH<sub>2</sub>Cl<sub>2</sub>). **HPLC analysis** (OX-3, 1% IPA in *n*-hexane, 0.5 ml/min,  $\lambda$  = 210 nm) indicated 98% *ee*:  $t_{(S)}$  (minor) = 12.9 min,  $t_{(R)}$  (major) = 15.3 min. **HRMS (ESI)**  $m/z$ : calculated for C<sub>9</sub>H<sub>10</sub>FO [M+Na]<sup>+</sup>: 153.0716, found: 153.0715.

### (*S*)-3-chloro-1-(2-chlorophenyl)propan-1-ol [(*S*)-3a]

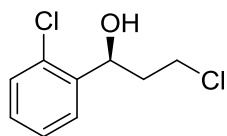

Prepared according to the general procedure: 100 mL PB buffer (50 mM, pH 8.5) containing 20 mM **3a** (2 mmol) and 10 g dcw/L *E. coli* (HheD8-M4) cells, 30 °C, reaction for 24 h. The crude product was purified by flash column chromatography on silica gel (petroleum ether: ethyl acetate = 40:1 ~ 20:1) to provide (*S*)-**3a** as a light yellow liquid in 51% yield (212.1 mg). **<sup>1</sup>H NMR (400 MHz, CDCl<sub>3</sub>)**  $\delta$  7.57 (d,  $J$  = 7.7 Hz, 1H), 7.32 (q,  $J$  = 9.7 Hz, 2H), 7.23 (t,  $J$  = 7.5 Hz, 1H), 5.35 (d,  $J$  = 8.4 Hz, 1H), 3.84 - 3.77 (m, 1H), 3.69 (dt,  $J$  = 10.8, 5.2 Hz, 1H), 2.26 - 2.18 (m, 2H), 2.15 - 2.06 (m, 1H). **<sup>13</sup>C NMR (100 MHz, CDCl<sub>3</sub>)**  $\delta$  141.2, 131.8, 129.7, 128.9, 127.3, 127.1, 68.1, 41.8, 39.8.  $[\alpha]_D^{25}$  = - 56.66 ( $c$  = 1.00, CH<sub>2</sub>Cl<sub>2</sub>). **HPLC analysis** (OX-3, 1% IPA in *n*-hexane, 0.5 ml/min,  $\lambda$  = 210 nm) indicated 94% *ee*:  $t_{(R)}$  (minor) = 34.7 min,  $t_{(S)}$  (major) = 36.7 min. **HRMS (ESI)**  $m/z$ : calculated for C<sub>9</sub>H<sub>11</sub>Cl<sub>2</sub>O [M+H]<sup>+</sup>: 205.0187, found: 205.0194.

### (*R*)-2-(2-chlorophenyl) oxetane[(*R*)-3b]

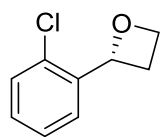

Prepared according to the general procedure: 100 mL PB buffer (50 mM, pH 8.5) containing 20 mM **3a** (2 mmol) and 10 g dcw/L *E. coli* (HheD8-M4) cells, 30 °C, reaction for 24 h. The crude product was purified by flash column chromatography on silica gel (petroleum ether: ethyl acetate = 50:1 ~ 40:1) to provide (*R*)-**3b** as a colorless liquid in 43% yield (143.9 mg). **<sup>1</sup>H NMR (400 MHz, CDCl<sub>3</sub>)**  $\delta$  7.76 (d,  $J$  = 9.4 Hz, 1H), 7.37 - 7.31 (m, 2H), 7.23 (td,  $J$  = 7.6, 1.7 Hz, 1H), 6.02 (t,  $J$  = 7.5 Hz, 1H), 4.84 (td,  $J$  = 7.5, 6.0 Hz, 1H), 4.65 (dt,  $J$  = 9.1, 6.0 Hz, 1H), 3.23 - 3.15 (m, 1H), 2.55 - 2.45 (m, 1H). **<sup>13</sup>C NMR (100 MHz, CDCl<sub>3</sub>)**  $\delta$  141.4, 130.4, 129.2, 128.5, 127.0, 126.0, 80.3, 68.6, 30.0.  $[\alpha]_D^{25}$  = + 193.99 ( $c$  = 1.00, CH<sub>2</sub>Cl<sub>2</sub>). **HPLC analysis** (OX-3, 1% IPA in *n*-hexane, 0.5 ml/min,  $\lambda$  = 210 nm) indicated 97% *ee*:  $t_{(S)}$  (minor) = 11.1 min,  $t_{(R)}$  (major) = 12.0 min. **HRMS (ESI)**  $m/z$ : calculated for C<sub>9</sub>H<sub>9</sub>ClNaO [M+Na]<sup>+</sup>: 191.0240, found: 191.0233.



### (S)-1-(2-bromophenyl)-3-chloropropan-1-ol [(S)-4a]

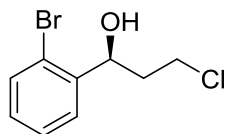

Prepared according to the general procedure: 100 mL PB buffer (50 mM, pH 8.5) containing 20 mM **4a** (2 mmol) and 10 g dcw/L *E. coli* (HheD8-M4) cells, 30 °C, reaction for 24 h. The crude product was purified by flash column chromatography on silica gel (petroleum ether: ethyl acetate = 40:1 ~ 20:1) to provide **(S)-4a** as a light yellow liquid in 50% yield (248.8 mg). **<sup>1</sup>H NMR (400 MHz, CDCl<sub>3</sub>)**  $\delta$  7.53 (dd,  $J$  = 11.6, 9.4 Hz, 2H), 7.34 (,  $J$  = 7.9 Hz, 1H), 7.15 (t,  $J$  = 7.6 Hz, 1H), 5.28 (d,  $J$  = 7.6 Hz, 1H), 3.83 - 3.76 (m, 1H), 3.71 - 3.65 (m, 1H), 2.46 (s, 1H), 2.25 - 2.18 (m, 1H), 2.10 - 2.01 (m, 1H). **<sup>13</sup>C NMR (100 MHz, CDCl<sub>3</sub>)** 142.8, 132.9, 129.2, 128.0, 127.3, 121.8, 70.3, 41.8, 39.8.  $[\alpha]_D^{25}$  = -53.76 ( $c$  = 1.00, CH<sub>2</sub>Cl<sub>2</sub>). **HPLC analysis** (OX-3, 1% IPA in *n*-hexane, 0.5 ml/min,  $\lambda$  = 210 nm) indicated 93% *ee*:  $t_{(R)}$  (minor) = 36.5 min,  $t_{(S)}$  (major) = 39.5 min. **HRMS (ESI)  $m/z$** : calculated for C<sub>9</sub>H<sub>11</sub>ClBrO  $[M+H]^+$ : 248.9682, found: 248.9682.

### (R)-2-(2-bromophenyl) oxetane [(R)-4b]

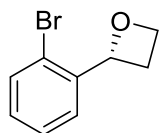

Prepared according to the general procedure: 100 mL PB buffer (50 mM, pH 8.5) containing 20 mM **4a** (2 mmol) and 10 g dcw/L *E. coli* (HheD8-M4) cells, 30 °C, reaction for 24 h. The crude product was purified by flash column chromatography on silica gel (petroleum ether: ethyl acetate = 50:1 ~ 40:1) to provide **(R)-4b** as a colorless liquid in 46% yield (196.3 mg). **<sup>1</sup>H NMR (400 MHz, CDCl<sub>3</sub>)**  $\delta$  7.76 (d,  $J$  = 7.6 Hz, 1H), 7.51 (d,  $J$  = 8.0 Hz, 1H), 7.40 (t,  $J$  = 7.5 Hz, 1H), 7.16 (t,  $J$  = 7.9 Hz, 1H), 5.94 (t,  $J$  = 7.5 Hz, 1H), 4.83 (td,  $J$  = 7.7, 6.0 Hz, 1H), 4.64 (dt,  $J$  = 9.1, 6.1 Hz, 1H), 3.26 - 3.18 (m, 1H), 2.52 - 2.44 (m, 1H). **<sup>13</sup>C NMR (100 MHz, CDCl<sub>3</sub>)**  $\delta$  142.7, 132.4, 128.8, 127.6, 126.3, 119.7, 82.2, 68.39, 30.1.  $[\alpha]_D^{25}$  = + 192.79 ( $c$  = 1.00, CH<sub>2</sub>Cl<sub>2</sub>). **HPLC analysis** (OX-3, 1% IPA in *n*-hexane, 0.5 ml/min,  $\lambda$  = 210 nm) indicated 96% *ee*:  $t_{(S)}$  (minor) = 11.4 min,  $t_{(R)}$  (major) = 12.3 min. **HRMS (ESI)  $m/z$** : calculated for C<sub>9</sub>H<sub>9</sub>BrNaO  $[M+Na]^+$ : 234.9734, found: 234.9737.

### (S)-3-chloro-1-(o-tolyl)propan-1-ol [(S)-5a]

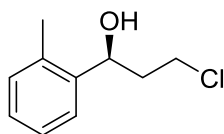

Prepared according to the general procedure: 100 mL PB buffer (50 mM, pH 8.5) containing 20 mM **5a** (2 mmol) and 10 g dcw/L *E. coli* (HheD8-M4) cells, 30 °C, reaction for 24 h. The crude product was purified by flash column chromatography on silica gel (petroleum ether : ethyl acetate = 40:1 ~ 20:1) to

provide (**S**)-**5a** as a colorless liquid in 50% yield (185.6 mg). **<sup>1</sup>H NMR (400 MHz, CDCl<sub>3</sub>)**  $\delta$  7.46 (d,  $J$  = 7.5 Hz, 1H), 7.26 - 7.14 (m, 3H), 5.16 (dd,  $J$  = 8.8, 3.9 Hz, 1H), 3.83 - 3.76 (m, 1H), 3.62 (dt,  $J$  = 10.8, 5.3 Hz, 1H), 2.35 (s, 3H), 2.13 - 2.00 (m, 2H). **<sup>13</sup>C NMR (100 MHz, CDCl<sub>3</sub>)**  $\delta$  142.0, 134.4, 130.6, 127.5, 126.4, 125.1, 67.4, 42.1, 40.5, 19.0.  $[\alpha]_D^{25}$  = - 46.64 ( $c$  = 1.00, CH<sub>2</sub>Cl<sub>2</sub>). **HPLC analysis** (OX-3, 1% IPA in *n*-hexane, 0.5 ml/min,  $\lambda$  = 210 nm) indicated 93% *ee*:  $t_{(S)}$  (major) = 37.8 min,  $t_{(R)}$  (minor) = 40.7 min. **HRMS (ESI)**  $m/z$ : calculated for C<sub>9</sub>H<sub>13</sub>ClNaO [M+Na]<sup>+</sup>: 207.0553, found: 207.0558.

#### (**R**)-2-(*o*-tolyl) oxetane [(**R**)-**5b**]

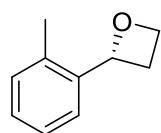

Prepared according to the general procedure: 100 mL PB buffer (50 mM, pH 8.5) containing 20 mM **5a** (2 mmol) and 10 g dcw/L *E. coli* (HheD8-M4) cells, 30 °C, reaction for 24 h. The crude product was purified by flash column chromatography on silica gel (petroleum ether : ethyl acetate = 50:1 ~ 40:1) to provide (**R**)-**5b** as a colorless liquid in 33% yield (98.7 mg). **<sup>1</sup>H NMR (400 MHz, CDCl<sub>3</sub>)**  $\delta$  7.70 (d,  $J$  = 7.7 Hz, 1H), 7.30 (t,  $J$  = 7.4 Hz, 1H), 7.21 (t,  $J$  = 5.9 Hz, 1H), 7.14 (d,  $J$  = 7.6 Hz, 1H), 6.00 (t,  $J$  = 7.6 Hz, 1H), 4.86 (td,  $J$  = 7.9, 5.8 Hz, 1H), 4.65 (dt,  $J$  = 9.2, 5.8 Hz, 1H), 3.13 - 2.05 (m, 1H), 2.59 - 2.51 (m, 1H), 2.19 (s, 3H). **<sup>13</sup>C NMR (100 MHz, CDCl<sub>3</sub>)**  $\delta$  141.8, 133.4, 130.1, 127.3, 126.2, 124.1, 80.8, 68.2, 29.8, 18.5.  $[\alpha]_D^{25}$  = + 224.21 ( $c$  = 1.00, CH<sub>2</sub>Cl<sub>2</sub>). **HPLC analysis** (OX-3, 1% IPA in *n*-hexane, 0.5 ml/min,  $\lambda$  = 210 nm) indicated 99% *ee*:  $t_{(R)}$  (major) = 15.0 min,  $t_{(S)}$  (minor) = 15.9 min. **HRMS (ESI)**  $m/z$ : calculated for C<sub>10</sub>H<sub>12</sub>NaO [M+Na]<sup>+</sup>: 171.0786, found: 171.0783.

#### (**S**)-3-chloro-1-(3-fluorophenyl)propan-1-ol [(**S**)-**6a**]

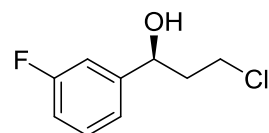

Prepared according to the general procedure: 100 mL PB buffer (50 mM, pH 8.5) containing 20 mM **6a** (2 mmol) and 10 g dcw/L *E. coli* (HheD8-M4) cells, 30 °C, reaction for 12 h. The crude product was purified by flash column chromatography on silica gel (petroleum ether : ethyl acetate = 40:1 ~ 20:1) to provide (**S**)-**6a** as a light yellow liquid in 47% yield (179.4 mg). **<sup>1</sup>H NMR (400 MHz, CDCl<sub>3</sub>)**  $\delta$  7.32 (q,  $J$  = 8.2 Hz, 1H), 7.09 (dd,  $J$  = 15.7, 7.8 Hz, 2H), 6.98 (t,  $J$  = 8.4 Hz, 1H), 4.93 (dd,  $J$  = 8.8, 4.6 Hz, 1H), 3.76 - 3.70 (m, 1H), 3.54 (dt,  $J$  = 11.0, 5.8 Hz, 1H), 2.29 (s, 1H), 2.22 - 2.14 (m, 1H), 2.10 - 2.01 (m, 1H). **<sup>13</sup>C NMR (100 MHz, CDCl<sub>3</sub>)**  $\delta$  163.1 (d,  $J$  = 245.0 Hz), 146.5 (d,  $J$  = 6.0 Hz), 130.3 (d,  $J$  = 8.0 Hz), 121.4 (d,  $J$  = 3.0 Hz), 114.8 (d,  $J$  = 21.0 Hz), 112.8 (d,  $J$  = 22.0 Hz), 70.7, 41.6,

41.4.  $[\alpha]_D^{25} = -14.79$  ( $c = 1.00$ ,  $\text{CH}_2\text{Cl}_2$ ). **HPLC analysis** (OX-3, 1% IPA in *n*-hexane, 0.5 ml/min,  $\lambda = 210$  nm) indicated 94% *ee*:  $t_{(S)}$  (major) = 44.0 min,  $t_{(R)}$  (minor) = 45.8 min. **HRMS (ESI)**  $m/z$ : calculated for  $\text{C}_9\text{H}_{11}\text{ClFO}$   $[\text{M}+\text{H}]^+$ : 189.0482, found: 189.0481.

**(*R*)-2-(3-fluorophenyl) oxetane [(*R*)-6b]**

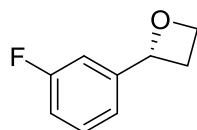

Prepared according to the general procedure: 100 mL PB buffer (50 mM, pH 8.5) containing 20 mM **6a** (2 mmol) and 10 g dcw/L *E. coli* (HheD8-M4) cells, 30 °C, reaction for 12 h. The crude product was purified by flash column chromatography on silica gel (petroleum ether : ethyl acetate = 50:1 ~ 40:1) to provide (*R*)-**6b** as a light yellow liquid in 36% yield (108.7 mg). **<sup>1</sup>H NMR (400 MHz, CDCl<sub>3</sub>)**  $\delta$  7.34 (td,  $J = 7.8$ , 5.6 Hz, 1H), 7.17 (t,  $J = 8.2$  Hz, 2H), 7.01 - 6.96 (m, 1H), 5.79 (t,  $J = 7.5$  Hz, 1H), 4.83 (td,  $J = 8.0$ , 6.0 Hz, 1H), 4.66 (dt,  $J = 9.6$ , 5.8 Hz, 1H), 3.09 - 3.00 (m, 1H), 2.66 - 2.58 (m, 1H). **<sup>13</sup>C NMR (100 MHz, CDCl<sub>3</sub>)**  $\delta$  163.2 (d,  $J = 245.0$  Hz), 146.5 (d,  $J = 7.0$  Hz), 130.2 (d,  $J = 8.0$  Hz), 120.7 (d,  $J = 3.0$  Hz), 114.6 (d,  $J = 21.0$  Hz), 112.2 (d,  $J = 22.0$  Hz), 82.2 (d,  $J = 2.0$  Hz), 68.5, 30.7.  $[\alpha]_D^{25} = +165.88$  ( $c = 1.00$ ,  $\text{CH}_2\text{Cl}_2$ ). **HPLC analysis** (OX-3, 1% IPA in *n*-hexane, 0.5 ml/min,  $\lambda = 210$  nm) indicated >99% *ee*:  $t_{(S)}$  (minor) = 14.7 min,  $t_{(R)}$  (major) = 15.8 min. **HRMS (ESI)**  $m/z$ : calculated for  $\text{C}_9\text{H}_{10}\text{FO}$   $[\text{M}+\text{H}]^+$ : 153.0716, found: 157.0713.

**(*S*)-3-chloro-1-(3-chlorophenyl)propan-1-ol [(*S*)-7a]**

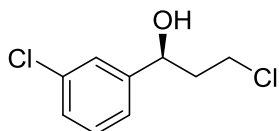

Prepared according to the general procedure: 100 mL PB buffer (50 mM, pH 8.5) containing 20 mM **7a** (2 mmol) and 10 g dcw/L *E. coli* (HheD8-M4) cells, 30 °C, reaction for 48 h. The crude product was purified by flash column chromatography on silica gel (petroleum ether : ethyl acetate = 40:1 ~ 20:1) to provide (*S*)-**7a** as a light yellow liquid in 48% yield (196.0 mg). **<sup>1</sup>H NMR (400 MHz, CDCl<sub>3</sub>)**  $\delta$  7.35 (s, 1H), 7.30 - 7.24 (m, 2H), 7.21 (dd,  $J = 6.6$ , 2.1 Hz, 1H), 4.90 (dd,  $J = 8.7$ , 4.6 Hz, 1H), 3.74 - 3.68 (m, 1H), 3.53 (dt,  $J = 11$ , 5.7 Hz, 1H), 2.40 (s, 1H), 2.20 - 2.12 (m, 1H), 2.07 - 1.99 (m, 1H). **<sup>13</sup>C NMR (100 MHz, CDCl<sub>3</sub>)**  $\delta$  145.9, 134.6, 130.0, 128.1, 126.0, 124.0, 70.7, 41.6, 41.4.  $[\alpha]_D^{25} = -21.68$  ( $c = 1.00$ ,  $\text{CH}_2\text{Cl}_2$ ). **HPLC analysis** (OX-3, 1% IPA in *n*-hexane, 0.5 ml/min,  $\lambda = 210$  nm) indicated 93% *ee*:  $t_{(S)}$  (major) = 43.8 min,  $t_{(R)}$  (minor) = 49.2 min. **HRMS (ESI)**  $m/z$ : calculated for  $\text{C}_9\text{H}_{11}\text{Cl}_2\text{O}$   $[\text{M}+\text{H}]^+$ : 205.0187, found: 205.0188.

**(R)-2-(3-chlorophenyl) oxetane [(R)-7b]**

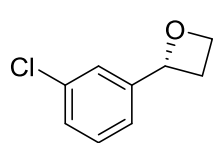

Prepared according to the general procedure: 100 mL PB buffer (50 mM, pH 8.5) containing 20 mM **7a** (2 mmol) and 10 g dcw/L *E. coli* (HheD8-M4) cells, 30 °C, reaction for 48 h. The crude product was purified by flash column chromatography on silica gel (petroleum ether : ethyl acetate = 50:1 ~ 40:1) to provide **(R)-7b** as a light yellow liquid in 45% yield (150.9 mg). **<sup>1</sup>H NMR (400 MHz, CDCl<sub>3</sub>)** δ 7.45 (s, 1H), 7.33 - 7.25 (m, 3H), 5.77 (t, *J* = 7.5 Hz, 1H), 4.83 (td, *J* = 7.9, 5.8 Hz, 1H), 4.66 (dt, *J* = 9.2, 5.8 Hz, 1H), 3.08 - 3.00 (m, 1H), 2.66 - 2.57 (m, 1H). **<sup>13</sup>C NMR (100 MHz, CDCl<sub>3</sub>)** δ 145.8, 134.6, 129.9, 127.9, 125.4, 123.3, 82.2, 68.5, 30.7. [ $\alpha$ ]<sub>D</sub><sup>25</sup> = + 137.77 (*c* = 1.00, CH<sub>2</sub>Cl<sub>2</sub>). **HPLC analysis** (OX-3, 1% IPA in *n*-hexane, 0.5 ml/min,  $\lambda$  = 210 nm) indicated 98% *ee*: *t*<sub>(S)</sub> (minor) = 14.4 min, *t*<sub>(R)</sub> (major) = 16.9 min. **HRMS (ESI) *m/z***: calculated for C<sub>9</sub>H<sub>9</sub>ClNaO [M+Na]<sup>+</sup>: 191.0240, found: 191.0236.

**(S)-1-(3-bromophenyl)-3-chloropropan-1-ol [(S)-8a]**

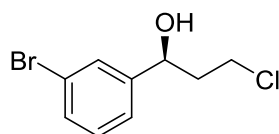

Prepared according to the general procedure: 100 mL PB buffer (50 mM, pH 8.5) containing 20 mM **8a** (2 mmol) and 10 g dcw/L *E. coli* (HheD8-M4) cells, 30 °C, reaction for 48 h. The crude product was purified by flash column chromatography on silica gel (petroleum ether : ethyl acetate = 40:1 ~ 20:1) to provide **(S)-8a** as a light yellow liquid in 50% yield (251.1 mg). **<sup>1</sup>H NMR (400 MHz, CDCl<sub>3</sub>)** δ 7.52 (s, 1H), 7.41 (d, *J* = 7.7 Hz, 1H), 7.24 (dt, *J* = 16.1, 10.3 Hz, 2H), 4.91 (dd, *J* = 8.8, 4.6 Hz, 1H), 3.76 - 3.70 (m, 1H), 3.54 (dt, *J* = 11.0, 5.7 Hz, 1H), 2.26 (s, 1H), 2.20 - 2.13 (m, 1H), 2.09 - 2.00 (m, 1H). **<sup>13</sup>C NMR (100 MHz, CDCl<sub>3</sub>)** δ 146.2, 131.0, 130.4, 129.0, 124.5, 122.9, 70.7, 41.6, 41.4. [ $\alpha$ ]<sub>D</sub><sup>25</sup> = - 16.69 (*c* = 1.00, CH<sub>2</sub>Cl<sub>2</sub>). **HPLC analysis** (OX-3, 1% IPA in *n*-hexane, 0.5 ml/min,  $\lambda$  = 210 nm) indicated 92% *ee*: *t*<sub>(S)</sub> (major) = 48.0 min, *t*<sub>(R)</sub> (minor) = 54.6 min. **HRMS (ESI) *m/z***: calculated for C<sub>9</sub>H<sub>10</sub>ClBrNaO [M+Na]<sup>+</sup>: 270.9501, found: 270.9504.

**(R)-2-(3-bromophenyl)oxetane [(R)-8b]**

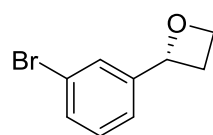

Prepared according to the general procedure: 100 mL PB buffer (50 mM, pH 8.5) containing 20 mM **8a** (2 mmol) and 10 g dcw/L *E. coli* (HheD8-M4) cells, 30 °C, reaction for 48 h. The crude product was purified by flash column chromatography on silica gel (petroleum ether : ethyl acetate = 50:1 ~ 40:1) to provide **(R)-8b** as

a light yellow liquid in 43% yield (182.5 mg). **<sup>1</sup>H NMR (400 MHz, CDCl<sub>3</sub>)**  $\delta$  7.61 (s, 1H), 7.42 (d,  $J$  = 7.8 Hz, 1H), 7.33 (d,  $J$  = 7.6 Hz, 1H), 7.25 (t,  $J$  = 7.8 Hz, 1H), 5.77 (t,  $J$  = 7.5 Hz, 1H), 4.83 (td,  $J$  = 8.1, 6.0 Hz, 1H), 4.66 (dt,  $J$  = 9.2, 5.8 Hz, 1H), 3.07 - 3.00 (m, 1H), 2.65 - 2.56 (m, 1H). **<sup>13</sup>C NMR (100 MHz, CDCl<sub>3</sub>)**  $\delta$  146.0, 130.8, 130.2, 128.3, 123.8, 122.8, 82.1, 68.4, 30.7.  $[\alpha]_D^{25}$  = + 130.01 ( $c$  = 1.00, CH<sub>2</sub>Cl<sub>2</sub>). **HPLC analysis** (OX-3, 1% IPA in *n*-hexane, 0.5 ml/min,  $\lambda$  = 210 nm) indicated 95% *ee*:  $t_{(S)}$  (minor) = 14.8 min,  $t_{(R)}$  (major) = 18.0 min. **HRMS (ESI)**  $m/z$ : calculated for C<sub>9</sub>H<sub>9</sub>BrNaO [M+Na]<sup>+</sup>: 234.9734, found: 234.9741.

### (*S*)-3-chloro-1-(*m*-tolyl)propan-1-ol [(*S*)-9a]

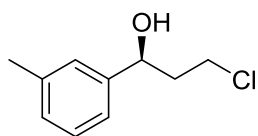

Prepared according to the general procedure: 100 mL PB buffer (50 mM, pH 8.5) containing 20 mM **9a** (2 mmol) and 10 g dcw/L *E. coli* (HheD8-M4) cells, 30 °C, reaction for 24 h. The crude product was purified by flash column chromatography on silica gel (petroleum ether : ethyl acetate = 40:1 ~ 20:1) to provide (*S*)-**9a** as a light yellow liquid in 51% yield (190.0 mg). **<sup>1</sup>H NMR (400 MHz, CDCl<sub>3</sub>)**  $\delta$  7.26 (t,  $J$  = 7.4 Hz, 1H), 7.18 - 7.15 (m, 2H), 7.12 (d,  $J$  = 7.6 Hz, 1H), 4.90 (dd,  $J$  = 8.6, 4.6 Hz, 1H), 3.77 - 3.71 (m, 1H), 3.59 - 3.54 (m, 1H), 2.37 (s, 3H), 2.28 - 2.19 (m, 1H), 2.12 - 2.04 (m, 1H). **<sup>13</sup>C NMR (100 MHz, CDCl<sub>3</sub>)**  $\delta$  143.8, 138.5, 128.8, 128.7, 126.6, 123.0, 71.4, 41.9, 41.5, 21.6.  $[\alpha]_D^{25}$  = - 25.98 ( $c$  = 1.00, CH<sub>2</sub>Cl<sub>2</sub>). **HPLC analysis** (OX-3, 1% IPA in *n*-hexane, 0.5 ml/min,  $\lambda$  = 210 nm) indicated 91% *ee*:  $t_{(S)}$  (major) = 40.1 min,  $t_{(R)}$  (minor) = 43.2 min. **HRMS (ESI)**  $m/z$ : calculated for C<sub>9</sub>H<sub>13</sub>ClNaO [M+Na]<sup>+</sup>: 207.0553, found: 207.0557.

### (*R*)-2-(*m*-tolyl)oxetane [(*R*)-9b]

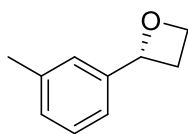

Prepared according to the general procedure: 100 mL PB buffer (50 mM, pH 8.5) containing 20 mM **9a** (2 mmol) and 10 g dcw/L *E. coli* (HheD8-M4) cells, 30 °C, reaction for 24 h. The crude product was purified by flash column chromatography on silica gel (petroleum ether : ethyl acetate = 50:1 ~ 40:1) to provide (*R*)-**9b** as a light yellow liquid in 34% yield (102.5 mg). **<sup>1</sup>H NMR (400 MHz, CDCl<sub>3</sub>)**  $\delta$  7.29 (t,  $J$  = 7.7 Hz, 2H), 7.23 (d,  $J$  = 7.6 Hz, 1H), 7.13 (d,  $J$  = 7.4 Hz, 1H), 5.80 (t,  $J$  = 7.5 Hz, 1H), 4.84 (td,  $J$  = 8.4, 6.5 Hz, 1H), 4.67 (dt,  $J$  = 9.3, 5.8 Hz, 1H), 3.06 - 2.98 (m, 1H), 2.72 - 2.63 (m, 1H), 2.40 (s, 3H). **<sup>13</sup>C NMR (100 MHz, CDCl<sub>3</sub>)**  $\delta$  143.6, 138.3, 128.7, 128.5, 126.0, 122.4, 83.1, 68.4, 30.8, 21.6.  $[\alpha]_D^{25}$  = + 148.32 ( $c$  = 1.00, CH<sub>2</sub>Cl<sub>2</sub>). **HPLC analysis** (OX-3, 3% IPA in *n*-hexane, 0.7 ml/min,  $\lambda$

= 210 nm) indicated 99% *ee*:  $t_{(S)}$  (minor) = 9.3 min,  $t_{(R)}$  (major) = 10.8 min. **HRMS (ESI)  $m/z$** : calculated for  $C_{10}H_{12}NaO$   $[M+Na]^+$ : 149.0966, found: 149.0961.

### (*S*)-3-chloro-1-(3-methoxyphenyl)propan-1-ol [(*S*)-10a]

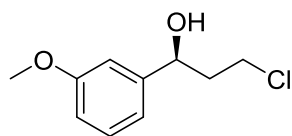

Prepared according to the general procedure: 100 mL PB buffer (50 mM, pH 8.5) containing 20 mM **10a** (2 mmol) and 10 g dcw/L *E. coli* (HheD8-M4) cells, 30 °C, reaction for 48 h. The crude product was purified by flash column chromatography on silica gel (petroleum ether : ethyl acetate = 40:1 ~ 20:1) to provide (*S*)-**10a** as a light yellow liquid in 51% yield (206.9 mg).  **$^1H$  NMR (400 MHz,  $CDCl_3$ )**  $\delta$  7.27 (t,  $J$  = 7.4 Hz, 1H), 6.92 (d,  $J$  = 8.8 Hz, 2H), 6.83 (d,  $J$  = 8.3 Hz, 1H), 4.90 (dd,  $J$  = 8.6, 4.8 Hz, 1H), 3.80 (s, 3H), 3.75 - 3.69 (m, 1H), 3.57 - 3.52 (m, 1H), 2.25 - 2.20 (m, 3H).  **$^{13}C$  NMR (100 MHz,  $CDCl_3$ )**  $\delta$  159.9, 145.5, 129.8, 118.1, 113.4, 111.3, 71.3, 55.4, 41.8, 41.4.  $[\alpha]_D^{25}$  = -19.79 ( $c$  = 1.00,  $CH_2Cl_2$ ). **HPLC analysis** (OD-H, 10% IPA in *n*-hexane, 1.0 ml/min,  $\lambda$  = 210 nm) indicated 91% *ee*:  $t_{(S)}$  (major) = 11.9 min,  $t_{(R)}$  (minor) = 13.8 min. **HRMS (ESI)  $m/z$** : calculated for  $C_9H_{14}ClO_2$   $[M+H]^+$ : 201.0682, found: 201.0681.

### (*R*)-2-(3-methoxyphenyl)oxetane [(*R*)-10b]

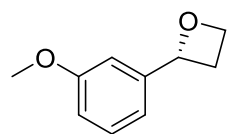

Prepared according to the general procedure: 100 mL PB buffer (50 mM, pH 8.5) containing 20 mM **10a** (2 mmol) and 10 g dcw/L *E. coli* (HheD8-M4) cells, 30 °C, reaction for 48 h. The crude product was purified by flash column chromatography on silica gel (petroleum ether : ethyl acetate = 50:1 ~ 40:1) to provide (*R*)-**10b** as a light yellow liquid in 43% yield (140.9 mg).  **$^1H$  NMR (400 MHz,  $CDCl_3$ )**  $\delta$  7.33 - 7.28 (m, 1H), 7.03 - 6.98 (m, 2H), 6.86 - 6.83 (m, 1H), 5.80 (t,  $J$  = 7.6 Hz, 1H), 4.86 - 4.80 (m, 1H), 4.69 - 4.64 (m, 1H), 3.84 (s, 1H), 3.07 - 2.98 (m, 1H), 2.70 - 2.61 (m, 1H).  **$^{13}C$  NMR (100 MHz,  $CDCl_3$ )**  $\delta$  159.9, 145.4, 129.7, 117.4, 113.5, 110.5, 82.9, 68.4, 55.4, 30.8.  $[\alpha]_D^{25}$  = + 133.21 ( $c$  = 1.00,  $CH_2Cl_2$ ). **HPLC analysis** (OX-3, 3% IPA in *n*-hexane, 0.7 ml/min,  $\lambda$  = 210 nm) indicated 97% *ee*:  $t_{(S)}$  (minor) = 14.1 min,  $t_{(R)}$  (major) = 20.5 min. **HRMS (ESI)  $m/z$** : calculated for  $C_{10}H_{12}NaO_2$   $[M+Na]^+$ : 187.0735, found: 187.0734.

### (S)-3-chloro-1-(4-fluorophenyl)propan-1-ol [(S)-11a]

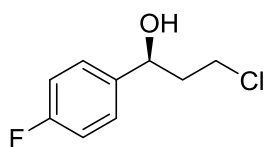

Prepared according to the general procedure: 100 mL PB buffer (50 mM, pH 8.5) containing 20 mM **11a** (2 mmol) and 10 g dcw/L *E. coli* (HheD8-M4) cells, 30 °C, reaction for 12 h. The crude product was purified by flash column chromatography on silica gel (petroleum ether: ethyl acetate = 40:1 ~ 20:1) to provide (S)-**11a** as a light yellow liquid in 52% yield (196.7 mg). <sup>1</sup>H NMR (400 MHz, CDCl<sub>3</sub>) δ 7.32 (dd, *J* = 8.6, 5.7 Hz, 2H), 7.04 (t, *J* = 8.6 Hz, 2H), 4.91 (dd, *J* = 8.6, 4.9 Hz, 1H), 3.74 - 3.68 (m, 1H), 3.52 (dt, *J* = 11.4, 5.8 Hz, 1H), 2.27 (s, 1H), 2.23 - 2.15 (m, 1H), 2.08 - 1.99 (m, 1H). <sup>13</sup>C NMR (100 MHz, CDCl<sub>3</sub>) δ 162.4 (d, *J* = 244.0 Hz), 139.5 (d, *J* = 3.0 Hz), 127.6 (d, *J* = 8.0 Hz), 115.6 (d, *J* = 22.0 Hz), 70.7, 41.7, 41.5. [α]<sub>D</sub><sup>25</sup> = - 32.31 (c = 1.00, CH<sub>2</sub>Cl<sub>2</sub>). HPLC analysis (OX-3, 1% IPA in *n*-hexane, 0.5 ml/min, λ = 210 nm) indicated 93% *ee*: t<sub>(S)</sub> (major) = 42.8 min, t<sub>(R)</sub> (minor) = 47.9 min. HRMS (ESI) *m/z*: calculated for C<sub>9</sub>H<sub>11</sub>ClFO [M+H]<sup>+</sup>: 189.0482, found: 189.0488.

### (R)-2-(4-fluorophenyl) oxetane [(R)-11b]

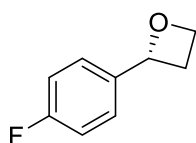

Prepared according to the general procedure: 100 mL PB buffer (50 mM, pH 8.5) containing 20 mM **11a** (2 mmol) and 10 g dcw/L *E. coli* (HheD8-M4) cells, 30 °C, reaction for 12 h. The crude product was purified by flash column chromatography on silica gel (petroleum ether: ethyl acetate = 50:1 ~ 40:1) to provide (R)-**11b** as a light yellow liquid in 34% yield (103.7 mg). <sup>1</sup>H NMR (400 MHz, CDCl<sub>3</sub>) δ 7.42 (dd, *J* = 8.4, 5.6 Hz, 2H), 7.07 (t, *J* = 8.7 Hz, 2H), 5.78 (t, *J* = 7.5 Hz, 1H), 4.82 (td, *J* = 8.1, 6.0 Hz, 1H), 4.64 (dt, *J* = 9.3, 5.8 Hz, 1H), 3.05 - 2.97 (m, 1H), 2.69 - 2.60 (m, 1H). <sup>13</sup>C NMR (100 MHz, CDCl<sub>3</sub>) δ 162.5 (d, *J* = 244.0 Hz), 139.4 (d, *J* = 4.0 Hz), 127.2 (d, *J* = 8.0 Hz), 115.5 (d, *J* = 21.0 Hz), 82.5, 68.2, 31.0. [α]<sub>D</sub><sup>25</sup> = + 148.82 (c = 1.00, CH<sub>2</sub>Cl<sub>2</sub>). HPLC analysis (OX-3, 1% IPA in *n*-hexane, 0.5 ml/min, λ = 210 nm) indicated >99% *ee*: t<sub>(S)</sub> (minor) = 15.3 min, t<sub>(R)</sub> (major) = 17.2 min. HRMS (ESI) *m/z*: calculated for C<sub>9</sub>H<sub>10</sub>FO [M+H]<sup>+</sup>: 169.0420, found: 169.0419.

### (S)-3-chloro-1-(4-chlorophenyl)propan-1-ol [(S)-12a]

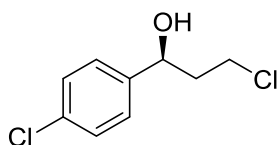

Prepared according to the general procedure: 100 mL PB buffer (50 mM, pH 8.5) containing 20 mM **12a** (2 mmol) and 10 g dcw/L *E. coli* (HheD8-M4) cells, 30 °C, reaction for 24 h. The crude product was purified by flash column chromatography on silica gel (petroleum ether: ethyl acetate = 40:1 ~ 20:1) to provide

(**S**)-**12a** as a light yellow liquid in 50% yield (206.9 mg). **<sup>1</sup>H NMR (400 MHz, CDCl<sub>3</sub>)** δ 7.33 (q, *J* = 8.6 Hz, 4H), 4.94 (dd, *J* = 8.6, 4.6 Hz, 1H), 3.78 - 3.72 (m, 1H), 3.55 (dt, *J* = 11.0, 5.8 Hz, 1H), 2.37 (s, 1H), 2.25 - 2.16 (m, 1H), 2.10 - 2.02 (m, 1H). **<sup>13</sup>C NMR (100 MHz, CDCl<sub>3</sub>)** δ 141.6, 132.4, 128.9, 127.3, 70.1, 42.4, 41.0. [ $\alpha$ ]<sub>D</sub><sup>25</sup> = - 13.09 (*c* = 1.00, CH<sub>2</sub>Cl<sub>2</sub>). **HPLC analysis** (OX-3, 1% IPA in *n*-hexane, 0.5 ml/min, λ = 210 nm) indicated 93% *ee*: *t*<sub>(S)</sub> (major) = 51.1 min, *t*<sub>(R)</sub> (minor) = 54.3 min. **HRMS (ESI)** *m/z*: calculated for C<sub>9</sub>H<sub>11</sub>Cl<sub>2</sub>O [M+H]<sup>+</sup>: 189.0482, found: 189.0488.

**(R)-2-(4-chlorophenyl) oxetane [(R)-12b]**

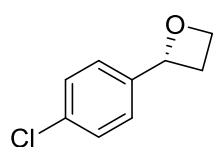

Prepared according to the general procedure: 100 mL PB buffer (50 mM, pH 8.5) containing 20 mM **12a** (2 mmol) and 10 g dcw/L *E. coli* (HheD8-M4) cells, 30 °C, reaction for 24 h. The crude product was purified by flash column chromatography on silica gel (petroleum ether: ethyl acetate = 50:1 ~ 40:1) to provide (**R**)-**12b** as a light yellow liquid in 37% yield (126.2 mg). **<sup>1</sup>H NMR (400 MHz, CDCl<sub>3</sub>)** 7.36 (t, *J* = 8.0 Hz, 4H), 5.78 (t, *J* = 7.5 Hz, 1H), 4.82 (td, *J* = 8.0, 5.9 Hz, 1H), 4.64 (dt, *J* = 9.2, 5.8 Hz, 1H), 3.07 - 2.98 (m, 1H), 2.66 - 2.58 (m, 1H). **<sup>13</sup>C NMR (100 MHz, CDCl<sub>3</sub>)** δ 142.2, 133.6, 128.8, 126.8, 82.3, 68.4, 30.9. [ $\alpha$ ]<sub>D</sub><sup>25</sup> = + 160.69 (*c* = 1.00, CH<sub>2</sub>Cl<sub>2</sub>). **HPLC analysis** (OX-3, 3% IPA in *n*-hexane, 0.7 ml/min, λ = 210 nm) indicated >99% *ee*: *t*<sub>(S)</sub> (minor) = 8.3 min, *t*<sub>(R)</sub> (major) = 8.9 min. **HRMS (ESI)** *m/z*: calculated for C<sub>9</sub>H<sub>9</sub>ClNaO [M+Na]<sup>+</sup>: 234.0410, found: 234.0409.

**(S)-1-(4-bromophenyl)-3-chloropropan-1-ol [(S)-13a]**

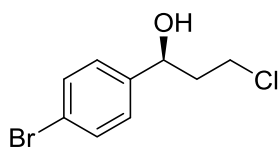

Prepared according to the general procedure: 100 mL PB buffer (50 mM, pH 8.5) containing 20 mM **13a** (2 mmol) and 10 g dcw/L *E. coli* (HheD8-M4) cells, 30 °C, reaction for 48 h. The crude product was purified by flash column chromatography on silica gel (petroleum ether: ethyl acetate = 40:1 ~ 20:1) to provide (**S**)-**13a** as a light yellow liquid in 50% yield (249.3 mg). **<sup>1</sup>H NMR (400 MHz, CDCl<sub>3</sub>)** δ 7.48 (d, *J* = 8.3 Hz, 2H), 7.24 (d, *J* = 8.2 Hz, 2H), 4.92 (dd, *J* = 8.7, 4.6 Hz, 1H), 3.76 - 3.70 (m, 1H), 3.54 (dt, *J* = 11.0, 5.8 Hz, 1H), 2.22 - 1.99 (m, 3H). **<sup>13</sup>C NMR (100 MHz, CDCl<sub>3</sub>)** δ 142.8, 131.9, 127.6, 121.8, 70.5, 41.7, 41.4. [ $\alpha$ ]<sub>D</sub><sup>25</sup> = - 16.69 (*c* = 1.00, CH<sub>2</sub>Cl<sub>2</sub>). **HPLC analysis** (OD-H, 10% IPA in *n*-hexane, 1.0 ml/min, λ = 210 nm) indicated 92% *ee*: *t*<sub>(S)</sub> (major) = 7.1 min, *t*<sub>(R)</sub> (minor) = 8.0 min. **HRMS (ESI)** *m/z*: calculated for C<sub>9</sub>H<sub>10</sub>ClBrNaO [M+Na]<sup>+</sup>: 270.9501, found: 270.9495.



### (*R*)-2-(4-bromophenyl) oxetane [(*R*)-13b]

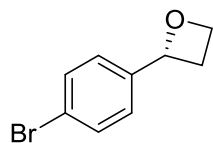

Prepared according to the general procedure: 100 mL PB buffer (50 mM, pH 8.5) containing 20 mM **13a** (2 mmol) and 10 g dcw/L *E. coli* (HheD8-M4) cells, 30 °C, reaction for 48 h. The crude product was purified by flash column chromatography on silica gel (petroleum ether : ethyl acetate = 50:1 ~ 40:1) to provide (*R*)-**13b** as a light yellow liquid in 42% yield (178.6 mg). **<sup>1</sup>H NMR (400 MHz, CDCl<sub>3</sub>)** δ 7.51 (d, *J* = 8.2 Hz, 2H), 7.31 (d, *J* = 8.1 Hz, 2H), 5.76 (t, *J* = 7.5 Hz, 1H), 4.82 (td, *J* = 8.1, 6.1 Hz, 1H), 4.64 (dt, *J* = 9.3, 5.8 Hz, 1H), 3.06 - 2.98 (m, 1H), 2.65 - 2.56 (m, 1H). **<sup>13</sup>C NMR (100 MHz, CDCl<sub>3</sub>)** δ 142.7, 131.7, 127.0, 121.7, 82.3, 68.4, 30.8. [ $\alpha$ ]<sub>D</sub><sup>25</sup> = + 129.74 (c = 1.00, CH<sub>2</sub>Cl<sub>2</sub>). **HPLC analysis** (OX-3, 1% IPA in *n*-hexane, 0.5 ml/min,  $\lambda$  = 210 nm) indicated 98% *ee*: *t*<sub>(S)</sub> (minor) = 15.9 min, *t*<sub>(R)</sub> (major) = 17.7 min. **HRMS (ESI) *m/z***: calculated for C<sub>9</sub>H<sub>9</sub>BrNaO [M+Na]<sup>+</sup>: 234.9734, found: 234.9733.

### (*S*)-3-chloro-1-(4-(trifluoromethyl)phenyl)propan-1-ol [(*S*)-14a]

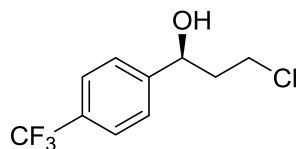

Prepared according to the general procedure: 100 mL PB buffer (50 mM, pH 8.5) containing 10 mM **14a** (1 mmol) and 10 g dcw/L *E. coli* (HheD8-M4) cells, 30 °C, reaction for 82 h. The crude product was purified by flash column chromatography on silica gel (petroleum ether : ethyl acetate = 40:1 ~ 20:1) to provide (*S*)-**14a** as a light yellow liquid in 53% yield (125.6 mg). **<sup>1</sup>H NMR (400 MHz, CDCl<sub>3</sub>)** δ 7.62 (d, *J* = 8.0 Hz, 2H), 7.49 (d, *J* = 7.9 Hz, 2H), 5.04 (dd, *J* = 9.0, 4.2 Hz, 1H), 3.80 - 3.74 (m, 1H), 3.57 (dt, *J* = 11.1, 5.6 Hz, 1H), 2.25 - 2.03 (m, 3H). **<sup>13</sup>C NMR (100 MHz, CDCl<sub>3</sub>)** δ 147.8, 130.2 (d, *J* = 32.0 Hz), 126.2, 125.7 (q, *J* = 4.0, Hz), 124.2 (d, *J* = 271.0 Hz), 70.8, 41.5 (d, *J* = 4.0 Hz). [ $\alpha$ ]<sub>D</sub><sup>25</sup> = - 10.39 (c = 1.00, CH<sub>2</sub>Cl<sub>2</sub>). **HPLC analysis** (OX-3, 3% IPA in *n*-hexane, 0.7 ml/min,  $\lambda$  = 210 nm) indicated 86% *ee*: *t*<sub>(S)</sub> (major) = 9.2 min, *t*<sub>(R)</sub> (minor) = 10.4 min. **HRMS (ESI) *m/z***: calculated for C<sub>10</sub>H<sub>10</sub>ClF<sub>3</sub>KO [M+K]<sup>+</sup>: 277.0009, found: 277.0006.

### (*R*)-2-(4-(trifluoromethyl)phenyl)oxetane [(*R*)-14b]

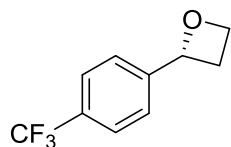

Prepared according to the general procedure: 100 mL PB buffer (50 mM, pH 8.5) containing 10 mM **14a** (1 mmol) and 10 g dcw/L *E. coli* (HheD8-M4) cells, 30 °C, reaction for 82 h. The crude product was purified by flash column chromatography on silica gel (petroleum ether : ethyl acetate = 50:1 ~ 40:1)

to provide **(R)-14b** as a light yellow liquid in 37% yield (74.1 mg). **<sup>1</sup>H NMR (400 MHz, CDCl<sub>3</sub>)** δ 7.65 (d, *J* = 8.1 Hz, 2H), 7.54 (d, *J* = 8.1 Hz, 2H), 5.86 (t, *J* = 7.6 Hz, 1H), 4.86 (td, *J* = 8.0, 6.0 Hz, 1H), 4.68 (dt, *J* = 9.2, 5.8 Hz, 1H), 3.13 - 3.04 (m, 1H), 2.65 - 2.57 (m, 1H). **<sup>13</sup>C NMR (100 MHz, CDCl<sub>3</sub>)** δ 147.7, 129.9 (q, *J* = 32.0 Hz), 125.6 (q, *J* = 3.0 Hz), 125.4, 124.2 (q, *J* = 256.0 Hz), 82.5, 68.6, 30.7. **[α]<sub>D</sub><sup>25</sup>** = + 99.32 (c = 1.00, CH<sub>2</sub>Cl<sub>2</sub>). **HPLC analysis** (OX-3, 3% IPA in *n*-hexane, 0.7 ml/min, λ = 210 nm) indicated 93% *ee*: *t*<sub>(S)</sub> (minor) = 6.5 min, *t*<sub>(R)</sub> (major) = 7.0 min. **HRMS (ESI)** *m/z*: calculated for C<sub>10</sub>H<sub>10</sub>F<sub>3</sub>NaO [M+Na]<sup>+</sup>: 203.0684, found: 203.0688.

### **(S)-3-chloro-1-(3,5-difluorophenyl)propan-1-ol [(S)-15a]**

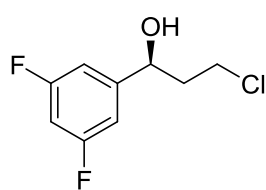

Prepared according to the general procedure: 100 mL PB buffer (50 mM, pH 8.5) containing 20 mM **15a** (2 mmol) and 10 g dcw/L *E. coli* (HheD8-M4) cells, 30 °C, reaction for 12 h. The crude product was purified by flash column chromatography on silica gel (petroleum ether : ethyl acetate = 40:1 ~ 20:1) to provide **(S)-15a** as a colorless liquid in 51% yield (211.6 mg). **<sup>1</sup>H NMR (400 MHz, CDCl<sub>3</sub>)** δ 6.89 (dd, *J* = 6.6, 2.2 Hz, 2H), 6.74 - 6.69 (m, 1H), 4.94 (dd, *J* = 8.8, 4.4 Hz, 1H), 3.77 - 3.71 (m, 1H), 3.56 (dt, *J* = 11.1, 5.6 Hz, 1H), 2.46 (s, 1H), 2.19 - 2.10 (m, 1H), 2.08 - 2.00 (m, 1H). **<sup>13</sup>C NMR (100 MHz, CDCl<sub>3</sub>)** 163.3 (dd, *J* = 248.0, 12.0 Hz), 148.0 (t, *J* = 9.0 Hz), 108.7 (dd, *J* = 18.0, 7.0 Hz), 103.2 (t, *J* = 25.0 Hz), 70.4 (t, *J* = 2.0 Hz), 41.4 (d, *J* = 7.0 Hz). **[α]<sub>D</sub><sup>25</sup>** = - 10.79 (c = 1.00, CH<sub>2</sub>Cl<sub>2</sub>). **HPLC analysis** (AD-H, 5% IPA in *n*-hexane, 0.5 ml/min, λ = 210 nm) indicated 92% *ee*: *t*<sub>(R)</sub> (minor) = 9.3 min, *t*<sub>(S)</sub> (major) = 10.7 min. **HRMS (ESI)** *m/z*: calculated for C<sub>9</sub>H<sub>9</sub>ClF<sub>2</sub>KO [M+K]<sup>+</sup>: 244.9947, found: 244.9952.

### **(R)-2-(3,5-difluorophenyl)oxetane [(R)-15b]**

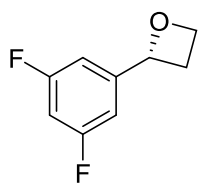

Prepared according to the general procedure: 100 mL PB buffer (50 mM, pH 8.5) containing 20 mM **15a** (2 mmol) and 10 g dcw/L *E. coli* (HheD8-M4) cells, 30 °C, reaction for 12 h. The crude product was purified by flash column chromatography on silica gel (petroleum ether : ethyl acetate = 50:1 ~ 40:1) to provide **(R)-15b** as a light yellow liquid in 32% yield (110.4 mg). **<sup>1</sup>H NMR (400 MHz, CDCl<sub>3</sub>)** δ 6.94 (dt, *J* = 6.3, 2.0 Hz, 2H), 6.72 (tt, *J* = 8.9, 2.4 Hz, 1H), 5.75 (t, *J* = 7.5 Hz, 1H), 4.82 (td, *J* = 8.0, 5.9 Hz, 1H), 4.65 (dt, *J* = 9.2, 5.9 Hz, 1H), 3.10 - 3.02 (m, 1H), 2.62 - 2.53 (m, 1H). **<sup>13</sup>C NMR (100 MHz, CDCl<sub>3</sub>)** δ 163.4 (dd, *J* = 247.0, 12.0 Hz), 148.0 (t, *J* = 9.0 Hz), 107.8 (dd, *J* = 19.0, 8.0

Hz), 103.0 (t,  $J = 25.0$  Hz), 81.7, 68.6, 30.6.  $[\alpha]_D^{25} = +153.59$  ( $c = 1.00$ ,  $\text{CH}_2\text{Cl}_2$ ). **HPLC analysis** (IA-3, 1% IPA in *n*-hexane, 0.5 ml/min,  $\lambda = 210$  nm) indicated 98% *ee*:  $t_{(R)}$  (major) = 12.5 min,  $t_{(S)}$  (minor) = 13.9 min. **HRMS (ESI)  $m/z$** : calculated for  $\text{C}_9\text{H}_9\text{F}_2\text{O}$   $[\text{M}+\text{H}]^+$ : 171.0625, found: 171.0621.

**(*S*)-3-chloro-1-(naphthalen-2-yl)propan-1-ol [(*S*)-16a]**

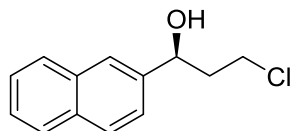

Prepared according to the general procedure: 100 mL PB buffer (50 mM, pH 8.5) containing 20 mM **16a** (2 mmol) and 10 g dcw/L *E. coli* (HheD8-M3) cells, 30 °C, reaction for 82 h. The crude product was purified by flash column chromatography on silica gel (petroleum ether : ethyl acetate = 40:1 ~ 20:1) to provide (*S*)-**16a** as a light yellow liquid in 50% yield (219.5 mg).  **$^1\text{H}$  NMR (400 MHz,  $\text{CDCl}_3$ )  $\delta$**  8.13 (d,  $J = 8.2$  Hz, 1H), 7.89 (d,  $J = 7.3$  Hz, 1H), 7.81 (d,  $J = 8.2$  Hz, 1H), 7.68 (d,  $J = 7.1$  Hz, 1H), 7.52 (dt,  $J = 24.7, 5.2$  Hz, 3H), 5.77 (dd,  $J = 8.8, 3.5$  Hz, 1H), 3.94 (td,  $J = 9.6, 5.1$  Hz, 1H), 3.70 (dt,  $J = 15.7, 1.3$  Hz, 1H), 2.38 - 2.23 (m, 2H).  **$^{13}\text{C}$  NMR (100 MHz,  $\text{CDCl}_3$ )  $\delta$**  139.6, 133.9, 130.1, 129.1, 128., 126.4, 125.9, 125.6, 123.0, 122.8, 68.0, 42.4, 40.8.  $[\alpha]_D^{25} = -51.66$  ( $c = 1.00$ ,  $\text{CH}_2\text{Cl}_2$ ). **HPLC analysis** (OX-3, 3% IPA in *n*-hexane, 0.7 ml/min,  $\lambda = 210$  nm) indicated 96% *ee*:  $t_{(S)}$  (major) = 16.1 min,  $t_{(R)}$  (minor) = 17.7 min. **HRMS (ESI)  $m/z$** : calculated for  $\text{C}_{13}\text{H}_{14}\text{ClO}$   $[\text{M}+\text{H}]^+$ : 221.0733, found: 221.0735.

**(*R*)-2-(naphthalen-2-yl)oxetane [(*R*)-16b]**

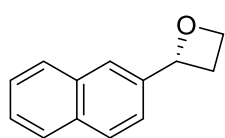

Prepared according to the general procedure: 100 mL PB buffer (50 mM, pH 8.5) containing 20 mM **16a** (2 mmol) and 10 g dcw/L *E. coli* (HheD8-M3) cells, 30 °C, reaction for 82 h. The crude product was purified by flash column chromatography on silica gel (petroleum ether : ethyl acetate = 50:1 ~ 40:1) to provide (*R*)-**16b** as a light yellow solid in 37% yield (137.4 mg).  **$^1\text{H}$  NMR (400 MHz,  $\text{CDCl}_3$ )  $\delta$**  7.94 - 7.91 (m, 1H), 7.88 (d,  $J = 7.1$  Hz, 1H), 7.83 (d,  $J = 8.3$  Hz, 1H), 7.70 - 7.67 (m, 1H), 7.59 (t,  $J = 7.7$  Hz, 1H), 7.54 - 7.51 (m, 2H), 6.51 (t,  $J = 7.6$  Hz, 1H), 4.98 (td,  $J = 7.9, 5.8$  Hz, 1H), 4.75 (dt,  $J = 9.1, 5.9$  Hz, 1H), 3.34 - 3.26 (m, 1H), 2.74 - 2.66 (m, 1H).  **$^{13}\text{C}$  NMR (100 MHz,  $\text{CDCl}_3$ )  $\delta$**  139.2, 133.6, 129.0, 128.9, 127.7, 126.1, 125.7, 125.7, 122.8, 121.4, 80.8, 68.7, 30.1.  $[\alpha]_D^{25} = +266.21$  ( $c = 1.00$ ,  $\text{CH}_2\text{Cl}_2$ ). **HPLC analysis** (OX-3, 3% IPA in *n*-hexane, 0.7 ml/min,  $\lambda = 210$  nm) indicated >99%

*ee*:  $t_{(S)}$  (minor) = 9.7 min,  $t_{(R)}$  (major) = 10.5 min. **HRMS (ESI)**  $m/z$ : calculated for  $C_{13}H_{13}O$   $[M+H]^+$ : 185.0966, found: 185.0970. **m.p.**: 65.5 - 66.7 °C.

#### (*S*)-4-chloro-2-phenylbutan-2-ol [(*S*)-17a]

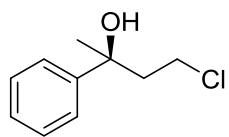

Prepared according to the general procedure: 100 mL PB buffer (50 mM, pH 8.5) containing 20 mM **18a** (2 mmol) and 10 g dcw/L *E. coli* (HheD8-M4) cells, 30 °C, reaction for 1.5 h. The crude product was purified by flash column chromatography on silica gel (petroleum ether : ethyl acetate = 40:1 ~ 20:1) to provide (*S*)-**17a** as a light yellow liquid in 49% yield (179.5 mg).  **$^1H$  NMR (400 MHz,  $CDCl_3$ )**  $\delta$  7.42 (d,  $J$  = 7.0 Hz, 2H), 7.36 (t,  $J$  = 7.1 Hz, 2H), 7.27 (t,  $J$  = 7.3 Hz, 1H), 3.58 - 3.51 (m, 1H), 3.37 - 3.30 (m, 1H), 2.33 - 2.28 (m, 2H), 1.60 (s, 3H).  **$^{13}C$  NMR (100 MHz,  $CDCl_3$ )**  $\delta$  146.4, 128.6, 127.2, 124.7, 74.5, 46.7, 40.6, 31.0.  $[\alpha]_D^{25}$  = - 13.99 ( $c$  = 1.00,  $CH_2Cl_2$ ). **HPLC analysis** (OX-3, 1% IPA in *n*-hexane, 0.5 ml/min,  $\lambda$  = 210 nm) indicated >99% *ee*:  $t_{(S)}$  (major) = 30.4 min,  $t_{(R)}$  (minor) = 33.8 min. **HRMS (ESI)**  $m/z$ : calculated for  $C_{10}H_{13}ClKO$   $[M+K]^+$ : 223.0292, found: 223.0290.

#### (*R*)-2-methyl-2-phenyloxetane [(*R*)-17b]

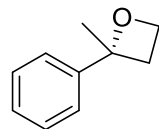

Prepared according to the general procedure: 100 mL PB buffer (50 mM, pH 8.5) containing 20 mM **17a** (2 mmol) and 10 g dcw/L *E. coli* (HheD8-M4) cells, 30 °C, reaction for 1.5 h. The crude product was purified by flash column chromatography on silica gel (petroleum ether : ethyl acetate = 50:1 ~ 40:1) to provide (*R*)-**17b** as a light yellow liquid in 36% yield (107.7 mg).  **$^1H$  NMR (400 MHz,  $CDCl_3$ )**  $\delta$  7.44 - 7.37 (m, 4H), 7.30 - 7.26 (m, 1H), 4.65 (dt,  $J$  = 8.6, 6.3 Hz, 1H), 4.55 (dt,  $J$  = 8.8, 6.5 Hz, 1H), 2.86 - 2.73 (m, 2H), 1.76 (s, 3H).  **$^{13}C$  NMR (100 MHz,  $CDCl_3$ )**  $\delta$  148.2, 128.3, 126.7, 123.6, 86.6, 64.6, 35.6, 30.8.  $[\alpha]_D^{25}$  = + 107.92 ( $c$  = 1.00,  $CH_2Cl_2$ ). **HPLC analysis** (OX-3, 1% IPA in *n*-hexane, 0.5 ml/min,  $\lambda$  = 210 nm) indicated >99% *ee*:  $t_{(S)}$  (minor) = 11.0 min,  $t_{(R)}$  (major) = 13.8 min. **HRMS (ESI)**  $m/z$ : calculated for  $C_{10}H_{13}O$   $[M+H]^+$ : 149.0966, found: 149.0963.

#### (*S*)-1-(5-bromopyridin-3-yl)-3-chloropropan-1-ol [(*S*)-18a]

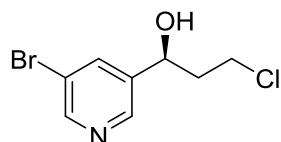

Prepared according to the general procedure: 100 mL PB buffer (50 mM, pH 8.5) containing 20 mM **18a** (2 mmol) and 10 g dcw/L *E. coli* (HheD8-M4) cells, 30 °C, reaction for 77 h. The crude product was purified by

flash column chromatography on silica gel (dichloromethane : ethyl acetate = 6:1) to provide (*S*)-**18a** as a light yellow liquid in 50% yield (250.0 mg). **<sup>1</sup>H NMR (400 MHz, CDCl<sub>3</sub>)** δ 8.41 (d, *J* = 2.1 Hz, 1H), 8.32 (d, *J* = 1.9 Hz, 1H), 7.87 (t, *J* = 2.0 Hz, 1H), 4.94 (dd, *J* = 9.1, 4.0 Hz, 1H), 4.77 (s, 1H), 3.79 - 3.73 (m, 1H), 3.56 (dt, *J* = 11.1, 5.4 Hz, 1H), 2.18 - 2.09 (m, 1H), 2.05 - 1.96 (m, 1H). **<sup>13</sup>C NMR (100 MHz, CDCl<sub>3</sub>)** δ 149.5, 145.3, 142.0, 136.8, 121.2, 67.5, 41.4, 41.3. **[α]<sub>D</sub><sup>25</sup>** = -12.09 (c = 1.00, CH<sub>2</sub>Cl<sub>2</sub>). **HPLC analysis** (OJ-H, 5% IPA in *n*-hexane, 1.0 ml/min, λ = 210 nm) indicated 89% *ee*: *t*<sub>(S)</sub> (major) = 14.1 min, *t*<sub>(R)</sub> (minor) = 16.2 min. **HRMS (ESI)** *m/z*: calculated for C<sub>8</sub>H<sub>10</sub>BrClNO [M+H]<sup>+</sup>: 249.9634, found: 249.9639.

#### (*R*)-3-bromo-5-(oxetan-2-yl) pyridine [(*R*)-**18b**]

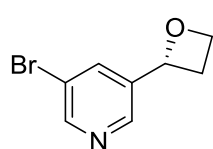

Prepared according to the general procedure: 100 mL PB buffer (50 mM, pH 8.5) containing 20 mM **18a** (2 mmol) and 10 g dcw/L *E. coli* (HheD8-M4) cells, 30 °C, reaction for 77 h. The crude product was purified by flash column chromatography on silica gel (petroleum ether: ethyl acetate = 8:1 ~ 6:1) to provide (*R*)-**18b** as a light yellow liquid in 42% yield (178.5 mg). **<sup>1</sup>H NMR (400 MHz, CDCl<sub>3</sub>)** δ 8.59 (t, *J* = 1.8 Hz, 1H), 8.49 (s, 1H), 7.97 (q, *J* = 1.8 Hz, 1H), 5.80 (t, *J* = 7.0 Hz, 1H), 4.87 - 4.81 (m, 1H), 4.69 - 4.64 (m, 1H), 3.12 - 3.03 (m, 1H), 2.67 - 2.58 (m, 1H). **<sup>13</sup>C NMR (100 MHz, CDCl<sub>3</sub>)** 150.3, 145.2, 140.8, 135.8, 121.1, 79.8, 68.8, 30.5. **[α]<sub>D</sub><sup>25</sup>** = +104.03 (c = 1.00, CH<sub>2</sub>Cl<sub>2</sub>). **HPLC analysis** (OB-H, 1% IPA in *n*-hexane, 0.5 ml/min, λ = 210 nm) indicated 97% *ee*: *t*<sub>(S)</sub> (minor) = 33.1 min, *t*<sub>(R)</sub> (major) = 35.8 min. **HRMS (ESI)** *m/z*: calculated for C<sub>8</sub>H<sub>9</sub>BrNO [M+H]<sup>+</sup>: 213.9868, found: 213.9864.

#### (*S*)-3-chloro-1-(quinolin-3-yl)propan-1-ol [(*S*)-**19a**]

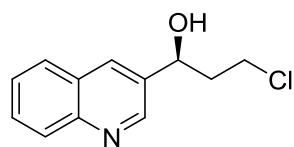

Prepared according to the general procedure: 100 mL PB buffer (200 mM, pH 8.5) containing 10 mM **19a** (1 mmol) and 10 g dcw/L *E. coli* (HheD8-M4) cells, 30 °C, reaction for 48 h. The crude product was purified by flash column chromatography on silica gel (dichloromethane: ethyl acetate = 4:1 ~ 3:1) to provide (*S*)-**19a** as a white solid in 48% yield (105.9 mg). **<sup>1</sup>H NMR (400 MHz, CDCl<sub>3</sub>)** δ 8.65 (d, *J* = 2.2 Hz, 1H), 8.05 (s, 1H), 7.96 (d, *J* = 8.4 Hz, 1H), 7.70 (d, *J* = 8.2 Hz, 1H), 7.64 - 7.60 (m, 1H), 7.51 - 7.47 (m, 1H), 5.10 (dd, *J* = 8.9, 4.2 Hz, 1H), 3.83 - 3.77 (m, 1H), 3.56 (dt, *J* = 10.9, 5.6 Hz, 1H), 2.28 - 2.20 (m, 1H), 2.10 - 2.02 (m, 1H). **<sup>13</sup>C NMR (100 MHz, CDCl<sub>3</sub>)** δ 149.0, 147.2, 137.0, 133.2, 129.7, 128.6, 127.9, 127.8, 127.1, 68.6, 41.7, 41.4. **[α]<sub>D</sub><sup>25</sup>** =

- 22.38 ( $c = 1.00$ ,  $\text{CH}_2\text{Cl}_2$ ). **HPLC analysis** (OD-H, 10% IPA in *n*-hexane, 1.0 ml/min,  $\lambda = 210$  nm) indicated 97% *ee*:  $t_{(S)}$  (major) = 16.3 min,  $t_{(R)}$  (minor) = 17.8 min. **HRMS (ESI)**  $m/z$ : calculated for  $\text{C}_{12}\text{H}_{13}\text{ClNO}$   $[\text{M}+\text{H}]^+$ : 222.0686, found: 222.0691. **m.p.**: 70.2 - 72.3 °C.

### (*R*)-3-(oxetan-2-yl)quinoline [(*R*)-19b]

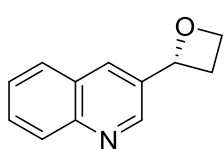

Prepared according to the general procedure: 100 mL PB buffer (200 mM, pH 8.5) containing 10 mM **19a** (1 mmol) and 10 g dcw/L *E. coli* (HheD8-M4) cells, 30 °C, reaction for 48 h. The crude product was purified by flash column chromatography on silica gel (dichloromethane: ethyl acetate = 6:1 ~ 4:1) to provide (*R*)-**19b** as a light yellow in 44% yield (82.2 mg). **<sup>1</sup>H NMR (400 MHz, CDCl<sub>3</sub>)**  $\delta$  8.95 (d,  $J = 2.2$  Hz, 1H), 8.22 (d,  $J = 2.1$  Hz, 1H), 8.11 (d,  $J = 8.5$  Hz, 1H), 7.83 (d,  $J = 8.2$  Hz, 1H), 7.72 - 7.68 (m, 1H), 7.56 - 7.52 (m, 1H), 6.01 (t,  $J = 7.5$  Hz, 1H), 4.90 (td,  $J = 8.0, 5.9$  Hz, 1H), 4.74 (dt,  $J = 9.3, 5.8$  Hz, 1H), 3.18 - 3.09 (m, 1H), 2.78 - 2.69 (m, 1H). **<sup>13</sup>C NMR (100 MHz, CDCl<sub>3</sub>)**  $\delta$  148.6, 147.8, 136.2, 132.4, 129.6, 129.3, 128.0, 127.8, 127.0, 81.0, 68.7, 30.7.  $[\alpha]_{\text{D}}^{25} = +139.30$  ( $c = 1.00$ ,  $\text{CH}_2\text{Cl}_2$ ). **HPLC analysis** (AD-H, 5% IPA in *n*-hexane, 0.5 ml/min,  $\lambda = 210$  nm) indicated 96% *ee*:  $t_{(S)}$  (minor) = 39.3 min,  $t_{(R)}$  (major) = 41.3 min. **HRMS (ESI)**  $m/z$ : calculated for  $\text{C}_{12}\text{H}_{12}\text{NO}$   $[\text{M}+\text{H}]^+$ : 186.0919, found: 186.0921.

### (*S*)-3-chloro-1-(thiophen-2-yl)propan-1-ol [(*S*)-20a]

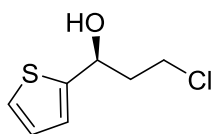

Prepared according to the general procedure: 100 mL PB buffer (50 mM, pH 8.5) containing 20 mM **20a** (2 mmol) and 10 g dcw/L *E. coli* (HheD8-M4) cells, 30 °C, reaction for 12 h. The crude product was purified by flash column chromatography on silica gel (petroleum ether: ethyl acetate = 40:1 ~ 20:1) to provide (*S*)-**20a** as a light yellow liquid in 50% yield (179.0 mg). **<sup>1</sup>H NMR (400 MHz, CDCl<sub>3</sub>)**  $\delta$  7.27 (dd,  $J = 4.9, 1.4$  Hz, 1H), 7.02 - 6.97 (m, 2H), 5.20 (dd,  $J = 8.5, 5.1$  Hz, 1H), 3.77 - 3.71 (m, 1H), 3.58 (dt,  $J = 16.9, 2.1$  Hz, 1H), 2.35 - 2.28 (m, 1H), 2.23 - 2.15 (m, 1H). **<sup>13</sup>C NMR (100 MHz, CDCl<sub>3</sub>)**  $\delta$  147.5, 126.9, 125.1, 124.2, 67.2, 41.6.  $[\alpha]_{\text{D}}^{25} = -36.78$  ( $c = 1.00$ ,  $\text{CH}_2\text{Cl}_2$ ). **HPLC analysis** (OX-3, 2% IPA in *n*-hexane, 0.5 ml/min,  $\lambda = 210$  nm) indicated > 99% *ee*:  $t_{(S)}$  (major) = 28.1 min,  $t_{(R)}$  (minor) = 30.2 min. **HRMS (ESI)**  $m/z$ : calculated for  $\text{C}_7\text{H}_{10}\text{ClOS}$   $[\text{M}+\text{H}]^+$ : 177.0141, found: 177.0138.

### (S)-3-chloro-1-cyclohexylpropan-1-ol [(S)-21a]

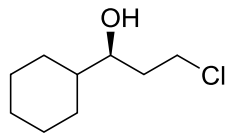

Prepared according to the general procedure: 100 mL PB buffer (50 mM, pH 8.5) containing 10 mM **21a** (1 mmol) and 10 g dcw/L *E. coli* (HheD8-M4) cells, 30 °C, reaction for 60 h. The crude product was purified by flash column chromatography on silica gel (petroleum ether: ethyl acetate = 40:1 ~ 20:1) to provide (**S**)-**21a** as a light yellow liquid in 48% yield (85.4 mg). **<sup>1</sup>H NMR (400 MHz, CDCl<sub>3</sub>)** δ 3.72 - 3.68 (m, 2H), 3.61 - 3.56 (m, 1H), 1.96 - 1.74 (m, 5H), 1.69 - 1.63 (m, 2H), 1.61 (s, 1H), 1.37 - 0.95 (m, 6H). **<sup>13</sup>C NMR (100 MHz, CDCl<sub>3</sub>)** δ 73.1, 43.5, 42.6, 36.9, 29.7, 28.4, 27.0, 26.3, 25.4. [ $\alpha$ ]<sub>D</sub><sup>25</sup> = - 28.10 (c = 1.00, CH<sub>2</sub>Cl<sub>2</sub>). **GC analysis** (CYCLODEX-B, 110 °C for 85 min) indicated >99% *ee*: t<sub>(S)</sub> (major) = 72.2 min. **HRMS (ESI) *m/z***: calculated for C<sub>9</sub>H<sub>17</sub>ClNaO [M+Na]<sup>+</sup>: 199.0866, found: 199.0875.

### (R)-2-cyclohexyloxetane [(R)-21b]

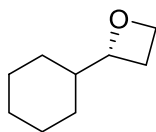

Prepared according to the general procedure: 100 mL PB buffer (50 mM, pH 8.5) containing 10 mM **21a** (1 mmol) and 10 g dcw/L *E. coli* (HheD8-M4) cells, 30 °C, reaction for 60 h. The crude product was purified by flash column chromatography on silica gel (petroleum ether: ethyl acetate = 50:1 ~ 40:1) to provide the (**R**)-**21b** as a light yellow liquid in 35% yield (48.9 mg). **<sup>1</sup>H NMR (400 MHz, CDCl<sub>3</sub>)** δ 4.65 (td, *J* = 8.0, 5.8 Hz, 1H), 4.50 - 4.41 (m, 2H), 2.60 - 2.51 (m, 1H), 2.42 - 2.33 (m, 1H), 1.89 - 1.85 (m, 1H), 1.77 - 1.57 (m, 5H), 1.30 - 1.12 (m, 3H), 0.91 - 0.77 (m, 2H). **<sup>13</sup>C NMR (100 MHz, CDCl<sub>3</sub>)** δ 86.8, 68.3, 44.8, 27.6, 26.6, 26.2, 25.8, 25.6. **GC analysis** (Rt-bDEXcst, 80 °C for 45 min) indicated >99% *ee*: t<sub>(R)</sub> (major) = 35.9 min. **HRMS (ESI) *m/z***: calculated for C<sub>9</sub>H<sub>17</sub>O [M+H]<sup>+</sup>: 141.1279, found: 141.1281.

### (S)-3-bromo-1-phenylpropan-1-ol [(S)-22a]

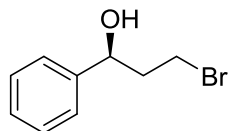

Prepared according to the general procedure: 100 mL PB buffer (50 mM, pH 8.5) containing 20 mM **17a** (2 mmol) and 10 g dcw/L *E. coli* (HheD8-M4) cells, 30 °C, reaction for 6 h. The crude product was purified by flash column chromatography on silica gel (petroleum ether: ethyl acetate = 40:1 ~ 20:1) to provide (**S**)-**22a** as a white solid in 50% yield (212.4 mg). **<sup>1</sup>H NMR (400 MHz, CDCl<sub>3</sub>)** δ 7.37 (d, *J* = 4.3 Hz, 4H), 7.33 - 7.28 (m, 1H), 4.93 (dd, *J* = 8.3, 4.6 Hz, 1H), 3.62 - 3.56 (m, 1H), 3.42 (dt, *J* = 10.0, 6.1 Hz,

1H), 2.37 - 2.28 (m, 1H), 2.22 - 2.13 (m, 1H).  $^{13}\text{C}$  NMR (100 MHz,  $\text{CDCl}_3$ )  $\delta$  143.7, 128.8, 128.1, 125.9, 72.4, 41.7, 30.4.  $[\alpha]_{\text{D}}^{25} = -9.59$  ( $c = 1.00$ ,  $\text{CH}_2\text{Cl}_2$ ). HPLC analysis (OD-H, 10% IPA in *n*-hexane, 1.0 ml/min,  $\lambda = 210$  nm) indicated >99% *ee*:  $t_{(\text{S})}$  (major) = 7.3 min. HRMS (ESI)  $m/z$ : calculated for  $\text{C}_9\text{H}_{11}\text{BrKO}$   $[\text{M}+\text{Na}]^+$ : 252.9630, found: 252.9640. mp.: 55.5 - 56.2 °C.

### (*R*)-2-phenyloxetane [(*R*)-1b] from 22a

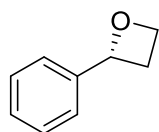

Prepared according to the general procedure: 100 mL PB buffer (50 mM, pH 8.5) containing 20 mM **22a** (2 mmol) and 10 g dcw/L *E. coli* (HheD8-M4) cells, 30 °C, reaction for 6 h. The crude product was purified by flash column chromatography on silica gel (petroleum ether : ethyl acetate = 50:1 ~ 40:1) to provide (*R*)-**1b** as a light yellow liquid in 30% yield (80.9 mg).  $^1\text{H}$  NMR (400 MHz,  $\text{CDCl}_3$ )  $\delta$  7.46 (d,  $J = 6.9$  Hz, 2H), 7.40 (t,  $J = 7.4$  Hz, 2H), 7.31 (t,  $J = 7.2$  Hz, 1H), 5.83 (t,  $J = 7.5$  Hz, 1H), 4.85 (td,  $J = 8.0, 5.8$  Hz, 1H), 4.67 (dt,  $J = 9.3, 5.8$  Hz, 1H), 3.08 - 2.99 (m, 1H), 2.72 - 2.64 (m, 1H).  $^{13}\text{C}$  NMR (100 MHz,  $\text{CDCl}_3$ )  $\delta$  143.6, 128.5, 127.8, 125.3, 83.0, 68.3, 30.8.  $[\alpha]_{\text{D}}^{25} = +161.58$  ( $c = 1.00$ ,  $\text{CH}_2\text{Cl}_2$ ). HPLC analysis (OX-3, 3% IPA in *n*-hexane, 0.7 ml/min,  $\lambda = 210$  nm) indicated 92% *ee*:  $t_{(\text{S})}$  (minor) = 10.0 min,  $t_{(\text{R})}$  (major) = 11.2 min. HRMS (ESI)  $m/z$ : calculated for  $\text{C}_9\text{H}_{10}\text{NaO}$   $[\text{M}+\text{Na}]^+$ : 157.0629, found: 157.0629.

### (*S*)-3-iodo-1-phenylpropan-1-ol [(*S*)-23a]

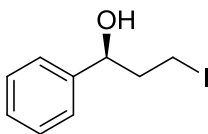

Prepared according to the general procedure: 100 mL Gly-NaOH buffer (300 mM, pH 9.5) containing 20 mM **23a** (2 mmol) and 10 g dcw/L *E. coli* (HheD8-M4) cells, 30 °C, reaction for 1.5 h. The crude product was purified by flash column chromatography on silica gel (petroleum ether: ethyl acetate = 40:1 ~ 20:1) to provide (*S*)-**23a** as a white solid in 47.9% yield (251.3 mg).  $^1\text{H}$  NMR (400 MHz,  $\text{CDCl}_3$ )  $\delta$  7.39 - 7.34 (m, 4H), 7.32 - 7.29 (m, 1H), 4.79 (dd,  $J = 8.1, 4.9$  Hz, 1H), 3.32 - 3.26 (m, 1H), 3.19 - 3.14 (m, 1H), 2.29 - 2.10 (m, 2H).  $^{13}\text{C}$  NMR (100 MHz,  $\text{CDCl}_3$ )  $\delta$  143.5, 128.8, 128.0, 125.9, 74.2, 42.3, 2.9.  $[\alpha]_{\text{D}}^{25} = -0.20$  ( $c = 1.00$ ,  $\text{CH}_2\text{Cl}_2$ ). HPLC analysis (OD-H, 10% IPA in *n*-hexane, 1.0 ml/min,  $\lambda = 210$  nm) indicated >99% *ee*:  $t_{(\text{S})}$  (major) = 7.6 min,  $t_{(\text{R})}$  (minor) = 9.3 min. HRMS (ESI)  $m/z$ : calculated for  $\text{C}_9\text{H}_{11}\text{NaIO}$   $[\text{M}+\text{Na}]^+$ : 284.9752, found: 284.9743. mp.: 44.6 - 45.3 °C.



**(R)-2-phenyloxetane [(R)-1b] from 23a**

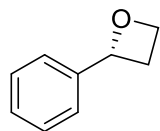

Prepared according to the general procedure: 100 mL Gly-NaOH buffer (300 mM, pH 9.5) containing 20 mM **23a** (2 mmol) and 10 g dcw/L *E. coli* (HheD8-M4) cells, 30 °C, reaction for 1.5 h. The crude product was purified by flash column chromatography on silica gel (petroleum ether: ethyl acetate = 50:1 ~ 40:1) to provide **(R)-1b** as a light yellow liquid in 39% yield (107.1 mg). **<sup>1</sup>H NMR (400 MHz, CDCl<sub>3</sub>)** δ 7.48 - 7.45 (m, 2H), 7.43 - 7.39 (m, 2H), 7.34 - 7.30 (m, 1H), 5.83 (t, *J* = 7.5 Hz, 1H), 4.85 (td, *J* = 8.0, 5.8 Hz, 1H), 4.68 (dt, *J* = 9.2, 5.8 Hz, 1H), 3.08 - 3.00 (m, 1H), 2.73 - 2.64 (m, 1H). **<sup>13</sup>C NMR (100 MHz, CDCl<sub>3</sub>)** δ 143.6, 128.6, 127.9, 125.3, 83.0, 68.3, 30.8. **[α]<sub>D</sub><sup>25</sup>** = + 173.18 (*c* = 1.00, CH<sub>2</sub>Cl<sub>2</sub>). **HPLC analysis** (OX-3, 3% IPA in *n*-hexane, 0.7 ml/min, λ = 210 nm) indicated 93% *ee*: *t*<sub>(S)</sub> (minor) = 11.0 min, *t*<sub>(R)</sub> (major) = 12.2 min. **HRMS (ESI)** *m/z*: calculated for C<sub>9</sub>H<sub>11</sub>O [M+H]<sup>+</sup>: 135.0810, found: 135.0812.

## 6. Biocatalytic enantioselective ring-opening of oxetanes

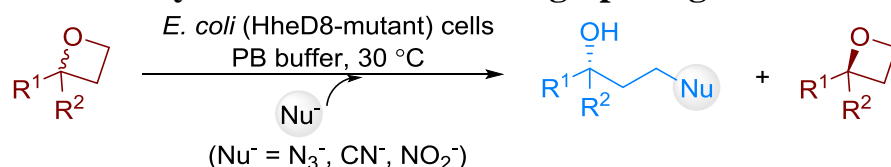

**General procedure:** In a 200 mL round-bottom flask, a resting cell suspension of *E. coli* (HheD8-M4) at a concentration of 10 g dcw/L was prepared in 100 mL of PB buffer (50 mM, pH 7.5). To this suspension, 2 mmol of oxetane (*rac*)-**b** and 2 mmol of  $\text{NaN}_3$  were added to a final concentration of 20 mM. The reaction mixture was then stirred at 30 °C. Upon completion of the enzymatic reaction, the mixture was subjected to extraction using ethyl acetate (3  $\times$  70 mL). The organic phases were separated by centrifugation (8800  $\times$  g, 3 min), combined, dried over anhydrous  $\text{Na}_2\text{SO}_4$ , and evaporated at reduced pressure. The resulting mixture was purified by flash chromatography (petroleum ether: ethyl acetate = 50:1 ~ 1:1) on silica gel to afford the desired chiral oxetane (*S*)-**b** and  $\gamma$ -azidoalcohol (*R*)-**c**.

### (*S*)-2-phenyloxetane [(*S*)-**1b**] (Ring opening by azide)

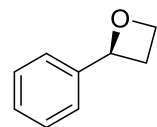

Prepared according to the general procedure: 100 mL PB buffer (50 mM, pH 7.5) containing 20 mM **1b** (2 mmol), 20 mM  $\text{NaN}_3$  (2 mmol) and 10 g dcw/L *E. coli* (HheD8-M4) cells, 30 °C, reaction for 10 h. The crude product was purified by flash column chromatography on silica gel (petroleum ether : ethyl acetate = 30:1) to provide (*S*)-**1b** as a light yellow liquid in 33% yield (88.1 mg).  $^1\text{H}$  NMR (400 MHz,  $\text{CDCl}_3$ )  $\delta$  7.50 - 7.45 (m, 2H), 7.42 (t,  $J$  = 7.5 Hz, 2H), 7.36 - 7.30 (m, 1H), 5.84 (t,  $J$  = 7.5 Hz, 1H), 4.85 (td,  $J$  = 8.0, 5.9 Hz, 1H), 4.68 (dt,  $J$  = 9.3, 5.7 Hz, 1H), 3.08 - 2.99 (m, 1H), 2.74 - 2.64 (m, 1H).  $^{13}\text{C}$  NMR (100 MHz,  $\text{CDCl}_3$ )  $\delta$  143.6, 128.5, 127.9, 125.3, 82.9, 68.3, 30.8.  $[\alpha]_{\text{D}}^{25}$  = -173.88 ( $c$  = 1.00,  $\text{CH}_2\text{Cl}_2$ ). HPLC analysis (OX-3, 3% IPA in *n*-hexane, 0.7 mL/min,  $\lambda$  = 210 nm) indicated >99% *ee*:  $t_{(\text{S})}$  (major) = 10.0 min,  $t_{(\text{R})}$  (minor) = 11.3 min. HRMS (ESI)  $m/z$ : calculated for  $\text{C}_9\text{H}_{11}\text{O}$   $[\text{M}+\text{H}]^+$ : 135.0810, found: 135.0806.

### (*R*)-3-azido-1-phenylpropan-1-ol [(*R*)-**1c**]

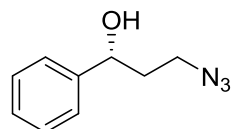

Prepared according to the general procedure: 100 mL PB buffer (50 mM, pH 7.5) containing 20 mM **1b** (2 mmol), 20 mM  $\text{NaN}_3$  (2 mmol) and 10 g dcw/L *E. coli* (HheD8-M4) cells, 30 °C, reaction for 10 h. The crude product was

purified by flash column chromatography on silica gel (petroleum ether : ethyl acetate = 30:1 ~ 10:1) to provide (*R*)-**1c** as a light yellow liquid in 47% yield (165.1 mg). **<sup>1</sup>H NMR (400 MHz, DMSO-*d*<sub>6</sub>)** δ 7.40 - 7.31 (m, 4H), 7.30 - 7.20 (m, 1H), 5.45 (d, *J* = 4.4 Hz, 1H), 4.66 (q, *J* = 5.9 Hz, 1H), 3.51 - 3.41 (m, 1H), 3.41 - 3.32 (m, 1H), 1.85 (q, *J* = 7.5 Hz, 2H). **<sup>13</sup>C NMR (100 MHz, DMSO-*d*<sub>6</sub>)** δ 145.7, 128.2, 127.0, 125.8, 69.6, 47.9, 38.2. [ $\alpha$ ]<sub>D</sub><sup>25</sup> = + 26.68 (*c* = 1.00, CH<sub>2</sub>Cl<sub>2</sub>). **HPLC analysis** (OX-3, 3% IPA in *n*-hexane, 0.7 ml/min, λ = 210 nm) indicated 97% *ee*: *t*<sub>(S)</sub> (minor) = 15.3 min, *t*<sub>(R)</sub> (major) = 16.6 min. **HRMS (ESI)** *m/z*: calculated for C<sub>9</sub>H<sub>11</sub>N<sub>3</sub>NaO [M+Na]<sup>+</sup>: 200.0800, found: 200.0803.

### (*S*)-2-(2-fluorophenyl)oxetane [(*S*)-**2b**]

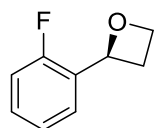

Prepared according to the general procedure: 100 mL PB buffer (50 mM, pH 7.5) containing 20 mM **2b** (2 mmol), 20 mM NaN<sub>3</sub> (2 mmol) and 10 g dcw/L *E. coli* (HheD8-M4) cells, 30 °C, reaction for 10 h. The crude product was purified by flash column chromatography on silica gel (petroleum ether : ethyl acetate = 40:1) to provide (*S*)-**2b** as a light yellow liquid in 35% yield (106.8 mg). **<sup>1</sup>H NMR (400 MHz, CDCl<sub>3</sub>)** δ 7.67 (td, *J* = 7.5, 2.0 Hz, 1H), 7.32 - 7.18 (m, 2H), 7.07 - 6.99 (m, 1H), 6.06 (t, *J* = 7.6 Hz, 1H), 4.85 (td, *J* = 7.8, 5.8 Hz, 1H), 4.69 (dt, *J* = 9.2, 5.9 Hz, 1H), 3.15 - 3.04 (m, 1H), 2.72 - 2.62 (m, 1H). **<sup>13</sup>C NMR (100 MHz, CDCl<sub>3</sub>)** δ 159.3 (d, *J* = 246.3 Hz), 130.8 (d, *J* = 13.6 Hz), 129.2 (d, *J* = 8.0 Hz), 126.9 (d, *J* = 4.5 Hz), 124.3 (d, *J* = 3.5 Hz), 115.2 (d, *J* = 20.7 Hz), 77.7, 68.9, 29.9. [ $\alpha$ ]<sub>D</sub><sup>25</sup> = -135.20 (*c* = 1.00, CH<sub>2</sub>Cl<sub>2</sub>). **HPLC analysis** (OX-3, 1% IPA in *n*-hexane, 0.5 ml/min, λ = 210 nm) indicated >99% *ee*: *t*<sub>(S)</sub> (major) = 12.9 min, *t*<sub>(R)</sub> (minor) = 16.5 min. **HRMS (ESI)** *m/z*: calculated for C<sub>9</sub>H<sub>10</sub>FO [M+H]<sup>+</sup>: 153.0716, found: 153.0712.

### (*R*)-3-azido-1-(2-fluorophenyl)propan-1-ol [(*R*)-**2c**]

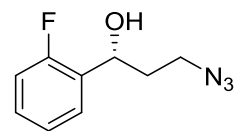

Prepared according to the general procedure: 100 mL PB buffer (50 mM, pH 7.5) containing 20 mM **2b** (2 mmol), 20 mM NaN<sub>3</sub> (2 mmol) and 10 g dcw/L *E. coli* (HheD8-M4) cells, 30 °C, reaction for 10 h. The crude product was purified by flash column chromatography on silica gel (petroleum ether : ethyl acetate = 40:1 ~ 10:1) to provide (*R*)-**2c** as a light yellow liquid in 48% yield (186.4 mg). **<sup>1</sup>H NMR (400 MHz, DMSO-*d*<sub>6</sub>)** δ 7.52 (td, *J* = 7.6, 1.8 Hz, 1H), 7.32 - 7.27 (m, 1H), 7.20 (t, *J* = 7.5 Hz, 1H), 7.13 (t, *J* = 10.5 Hz, 1H), 5.54 (d, *J* = 4.8 Hz, 1H), 4.95 (dt, *J* = 8.1, 4.9 Hz, 1H), 3.53 - 3.37 (m, 2H), 1.92

- 1.74 (m, 2H).  $^{13}\text{C}$  NMR (100 MHz, DMSO- $d_6$ )  $\delta$  158.9 (d,  $J$  = 243.3 Hz), 132.3 (d,  $J$  = 13.7 Hz), 128.8 (d,  $J$  = 8.2 Hz), 127.5 (d,  $J$  = 4.7 Hz), 124.5 (d,  $J$  = 3.3 Hz), 115.0 (d,  $J$  = 21.7 Hz), 63.2, 47.6, 36.9.  $[\alpha]_D^{25}$  = + 68.15 ( $c$  = 1.00,  $\text{CH}_2\text{Cl}_2$ ). **HPLC analysis** (IH, 3% IPA in *n*-hexane, 0.5 ml/min,  $\lambda$  = 210 nm) indicated 98% *ee*:  $t_{(R)}$  (major) = 26.9 min,  $t_{(S)}$  (minor) = 28.1 min. **HRMS (ESI)**  $m/z$ : calculated for  $\text{C}_9\text{H}_{10}\text{FN}_3\text{NaO}$   $[\text{M}+\text{Na}]^+$ : 218.0706, found: 218.0701.

### (*S*)-2-(2-chlorophenyl)oxetane [(*S*)-3b]

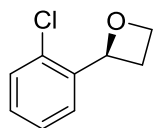

Prepared according to the general procedure: 100 mL PB buffer (50 mM, pH 7.5) containing 20 mM **3b** (2 mmol), 20 mM  $\text{NaN}_3$  (2 mmol) and 10 g dcw/L *E. coli* (HheD8-M4) cells, 30 °C, reaction for 37 h. The crude product was purified by flash column chromatography on silica gel (petroleum ether : ethyl acetate = 40:1) to provide (*S*)-**3b** as a yellow liquid in 42% yield (141.7 mg).  $^1\text{H}$  NMR (400 MHz,  $\text{CDCl}_3$ )  $\delta$  7.77 (d,  $J$  = 7.6 Hz, 1H), 7.38 - 7.30 (m, 2H), 7.23 (td,  $J$  = 6.4, 1.0 Hz, 1H), 6.02 (t,  $J$  = 7.5 Hz, 1H), 4.84 (td,  $J$  = 6.4, 5.2 Hz, 1H), 4.65 (dt,  $J$  = 9.2, 6.1 Hz, 1H), 3.24 - 3.14 (m, 1H), 2.56 - 2.46 (m, 1H).  $^{13}\text{C}$  NMR (100 MHz,  $\text{CDCl}_3$ )  $\delta$  141.3, 130.3, 129.1, 128.4, 126.9, 125.9, 80.2, 68.5, 29.9.  $[\alpha]_D^{25}$  = -207.95 ( $c$  = 1.00,  $\text{CH}_2\text{Cl}_2$ ). **HPLC analysis** (OX-3, 1% IPA in *n*-hexane, 0.5 ml/min,  $\lambda$  = 210 nm) indicated 92% *ee*:  $t_{(S)}$  (major) = 11.1 min,  $t_{(R)}$  (minor) = 11.9 min. **HRMS (ESI)**  $m/z$ : calculated for  $\text{C}_9\text{H}_9\text{ClNaO}$   $[\text{M}+\text{Na}]^+$ : 191.0240, found: 191.0245.

### (*R*)-3-azido-1-(2-chlorophenyl)propan-1-ol [(*R*)-3c]

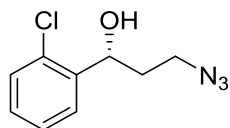

Prepared according to the general procedure: 100 mL PB buffer (50 mM, pH 7.5) containing 20 mM **3b** (2 mmol), 20 mM  $\text{NaN}_3$  (2 mmol) and 10 g dcw/L *E. coli* (HheD8-M4) cells, 30 °C, reaction for 37 h. The crude product was purified by flash column chromatography on silica gel (petroleum ether : ethyl acetate = 40:1 ~ 10:1) to provide (*R*)-**3c** as a light yellow liquid in 48% yield (204.9 mg).  $^1\text{H}$  NMR (400 MHz, DMSO- $d_6$ )  $\delta$  7.62 (d,  $J$  = 7.5 Hz, 1H), 7.39 - 7.34 (m, 2H), 7.29 - 7.24 (m, 1H), 5.61 (d,  $J$  = 4.3 Hz, 1H), 5.02 (dt,  $J$  = 9.6, 3.8 Hz, 1H), 3.53 - 3.42 (m, 2H), 1.95 - 1.84 (m, 1H), 1.74 - 1.64 (m, 1H).  $^{13}\text{C}$  NMR (100 MHz, DMSO- $d_6$ )  $\delta$  143.0, 130.4, 129.0, 128.6, 127.5, 127.4, 66.0, 47.7, 36.6.  $[\alpha]_D^{25}$  = + 78.34 ( $c$  = 1.00,  $\text{CH}_2\text{Cl}_2$ ). **HPLC analysis** (OX-3, 1% IPA in *n*-hexane, 0.5 ml/min,  $\lambda$  = 210 nm) indicated 94% *ee*:  $t_{(R)}$  (major) = 43.1 min,  $t_{(S)}$  (minor) = 45.6 min. **HRMS (ESI)**  $m/z$ : calculated for  $\text{C}_9\text{H}_{10}\text{ClN}_3\text{NaO}$   $[\text{M}+\text{Na}]^+$ : 234.0410, found: 234.0409.

### (S)-2-(2-bromophenyl)oxetane [(S)-4b]

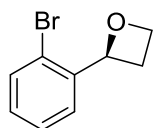

Prepared according to the general procedure: 100 mL PB buffer (50 mM, pH 7.5) containing 20 mM **4b** (2 mmol), 20 mM  $\text{NaN}_3$  (2 mmol) and 10 g dcw/L *E. coli* (HheD8-M4) cells, 30 °C, reaction for 60 h. The crude product was purified by flash column chromatography on silica gel (petroleum ether : ethyl acetate = 40:1) to provide (S)-**4b** as a light yellow liquid in 48% yield (204.8 mg).  $^1\text{H}$  NMR (400 MHz,  $\text{CDCl}_3$ )  $\delta$  7.76 (d,  $J$  = 7.7 Hz, 1H), 7.51 (d,  $J$  = 7.9 Hz, 1H), 7.40 (t,  $J$  = 7.5 Hz, 1H), 7.16 (t,  $J$  = 7.8 Hz, 1H), 5.94 (t,  $J$  = 7.5 Hz, 1H), 4.83 (td,  $J$  = 8.5, 6.6 Hz, 1H), 4.64 (dt,  $J$  = 9.1, 6.1 Hz, 1H), 3.27 - 3.17 (m, 1H), 2.53 - 2.43 (m, 1H).  $^{13}\text{C}$  NMR (100 MHz,  $\text{CDCl}_3$ )  $\delta$  142.9, 132.4, 128.8, 127.6, 126.3, 119.7, 82.1, 68.4, 30.1.  $[\alpha]_{\text{D}}^{25}$  = -169.48 ( $c$  = 1.00,  $\text{CH}_2\text{Cl}_2$ ). HPLC analysis (OX-3, 1% IPA in *n*-hexane, 0.5 ml/min,  $\lambda$  = 210 nm) indicated 93% *ee*:  $t_{(S)}$  (major) = 11.5 min,  $t_{(R)}$  (minor) = 12.3 min. HRMS (ESI)  $m/z$ : calculated for  $\text{C}_9\text{H}_9\text{BrNaO}$   $[\text{M}+\text{Na}]^+$ : 234.9734, found: 234.9739.

### (R)-3-azido-1-(2-bromophenyl)propan-1-ol [(R)-4c]

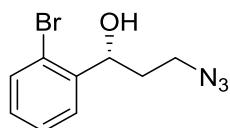

Prepared according to the general procedure: 100 mL PB buffer (50 mM, pH 7.5) containing 20 mM **4b** (2 mmol), 20 mM  $\text{NaN}_3$  (2 mmol) and 10 g dcw/L *E. coli* (HheD8-M4) cells, 30 °C, reaction for 60 h. The crude product was purified by flash column chromatography on silica gel (petroleum ether : ethyl acetate = 40:1 ~ 10:1) to provide (R)-**4c** as a light yellow liquid in 44% yield (222.8 mg).  $^1\text{H}$  NMR (400 MHz,  $\text{DMSO}-d_6$ )  $\delta$  7.58 (dd,  $J$  = 28.3, 9.6 Hz, 2H), 7.40 (t,  $J$  = 7.5 Hz, 1H), 7.19 (t,  $J$  = 7.8 Hz, 1H), 5.67 (d,  $J$  = 4.8 Hz, 1H), 4.97 (dt,  $J$  = 9.8, 3.6 Hz, 1H), 3.55 - 3.43 (m, 2H), 1.97 - 1.85 (m, 1H), 1.73 - 1.62 (m, 1H).  $^{13}\text{C}$  NMR (100 MHz,  $\text{DMSO}-d_6$ )  $\delta$  144.5, 132.3, 128.9, 127.9, 127.8, 120.9, 68.3, 47.7, 36.7.  $[\alpha]_{\text{D}}^{25}$  = + 84.24 ( $c$  = 1.00,  $\text{CH}_2\text{Cl}_2$ ). HPLC analysis (OX-3, 3% IPA in *n*-hexane, 0.7 ml/min,  $\lambda$  = 210 nm) indicated 91% *ee*:  $t_{(R)}$  (major) = 12.7 min,  $t_{(S)}$  (minor) = 13.7 min. HRMS (ESI)  $m/z$ : calculated for  $\text{C}_9\text{H}_{10}\text{BrN}_3\text{NaO}$   $[\text{M}+\text{Na}]^+$ : 277.9905, found: 277.9909.

### (S)-2-(*o*-tolyl)oxetane [(S)-5b]

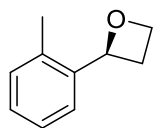

Prepared according to the general procedure: 100 mL PB buffer (50 mM, pH 7.5) containing 20 mM **5b** (2 mmol), 20 mM  $\text{NaN}_3$  (2 mmol) and 10 g dcw/L *E. coli* (HheD8-M4) cells, 30 °C, reaction for 33 h. The crude product was purified by flash column chromatography on silica gel (petroleum ether : ethyl acetate = 40:1) to

provide (*S*)-**5b** as a yellow liquid in 30% yield (91.5 mg). **<sup>1</sup>H NMR (400 MHz, CDCl<sub>3</sub>)** δ 7.72 (d, *J* = 7.6 Hz, 1H), 7.32 (t, *J* = 7.9 Hz, 1H), 7.22 (t, *J* = 7.4 Hz, 1H), 7.16 (d, *J* = 7.5 Hz, 1H), 6.01 (t, *J* = 7.6 Hz, 1H), 4.87 (td, *J* = 8.1, 6.4 Hz, 1H), 4.66 (dt, *J* = 9.3, 5.8 Hz, 1H), 3.15 - 3.06 (m, 1H), 2.61 - 2.51 (m, 1H), 2.20 (s, 3H). **<sup>13</sup>C NMR (100 MHz, CDCl<sub>3</sub>)** δ 141.7, 133.3, 130.0, 127.2, 126.1, 124.0, 80.6, 68.1, 29.7, 18.4.  $[\alpha]_D^{25} = -173.68$  (*c* = 1.00, CH<sub>2</sub>Cl<sub>2</sub>). **HPLC analysis** (OX-3, 1% IPA in *n*-hexane, 0.5 ml/min, λ = 210 nm) indicated 97% *ee*: *t*<sub>(*R*)</sub> (minor) = 14.4 min, *t*<sub>(*S*)</sub> (major) = 15.1 min. **HRMS (ESI)** *m/z*: calculated for C<sub>10</sub>H<sub>13</sub>O [M+H]<sup>+</sup>: 149.0966, found: 149.0968.

### (*R*)-3-azido-1-(*o*-tolyl)propan-1-ol [(*R*)-**5c**]

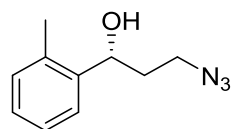

Prepared according to the general procedure: 100 mL PB buffer (50 mM, pH 7.5) containing 20 mM **5b** (2 mmol), 20 mM NaN<sub>3</sub> (2 mmol) and 10 g dcw/L *E. coli* (HheD8-M4) cells, 30 °C, reaction for 33 h. The crude product was purified by flash column chromatography on silica gel (petroleum ether : ethyl acetate = 40:1 ~ 10:1) to provide (*R*)-**5c** as a light yellow liquid in 44% yield (173.3 mg). **<sup>1</sup>H NMR (400 MHz, DMSO-*d*<sub>6</sub>)** δ 7.47 (d, *J* = 7.6 Hz, 1H), 7.22 - 7.18 (m, 1H), 7.16 - 7.10 (m, 2H), 5.32 (d, *J* = 4.5 Hz, 1H), 4.87 (dt, *J* = 8.7, 4.2 Hz, 1H), 3.57 - 3.40 (m, 2H), 2.30 (s, 3H), 1.86 - 1.69 (m, 2H). **<sup>13</sup>C NMR (100 MHz, DMSO-*d*<sub>6</sub>)** δ 143.8, 133.7, 130.0, 126.6, 126.0, 125.4, 66.0, 48.1, 37.0, 18.6.  $[\alpha]_D^{25} = +40.97$  (*c* = 1.00, CH<sub>2</sub>Cl<sub>2</sub>). **HPLC analysis** (OX-3, 3% IPA in *n*-hexane, 0.7 ml/min, λ = 210 nm) indicated 97% *ee*: *t*<sub>(*S*)</sub> (minor) = 13.0 min, *t*<sub>(*R*)</sub> (major) = 14.1 min. **HRMS (ESI)** *m/z*: calculated for C<sub>10</sub>H<sub>13</sub>N<sub>3</sub>NaO [M+Na]<sup>+</sup>: 214.0956, found: 214.0949.

### (*S*)-2-(3-fluorophenyl)oxetane [(*S*)-**6b**]

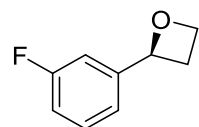

Prepared according to the general procedure: 100 mL PB buffer (50 mM, pH 7.5) containing 20 mM **6b** (2 mmol), 20 mM NaN<sub>3</sub> (2 mmol) and 10 g dcw/L *E. coli* (HheD8-M4) cells, 30 °C, reaction for 12 h. The crude product was purified by flash column chromatography on silica gel (petroleum ether : ethyl acetate = 30:1) to provide (*S*)-**6b** as a light yellow liquid in 38% yield (115.7 mg). **<sup>1</sup>H NMR (400 MHz, CDCl<sub>3</sub>)** δ 7.34 (td, *J* = 7.9, 5.9 Hz, 1H), 7.20 - 7.15 (m, 2H), 6.98 (td, *J* = 8.2, 2.6 Hz, 1H), 5.79 (t, *J* = 7.5 Hz, 1H), 4.83 (td, *J* = 8.2, 6.2 Hz, 1H), 4.66 (dt, *J* = 9.3, 5.8 Hz, 1H), 3.08 - 3.00 (m, 1H), 2.66 - 2.57 (m, 1H). **<sup>13</sup>C NMR (100 MHz, CDCl<sub>3</sub>)** δ 163.2 (d, *J* = 246.0 Hz), 146.5 (d, *J* = 6.9 Hz), 130.2 (d, *J* = 8.1 Hz), 120.7 (d, *J* = 2.9 Hz), 114.6 (d, *J* = 21.3 Hz), 112.2 (d, *J* = 21.8 Hz), 82.2, 68.4, 30.7.  $[\alpha]_D^{25} = -$

169.88 ( $c = 1.00$ ,  $\text{CH}_2\text{Cl}_2$ ). **HPLC analysis** (OX-3, 1% IPA in *n*-hexane, 0.5 ml/min,  $\lambda = 210$  nm) indicated 99% *ee*:  $t_{(S)}$  (major) = 14.4 min,  $t_{(R)}$  (minor) = 15.2 min. **HRMS (ESI)**  $m/z$ : calculated for  $\text{C}_9\text{H}_{10}\text{FO}$   $[\text{M}+\text{H}]^+$ : 153.0716, found: 153.0718.

**(*R*)-3-azido-1-(3-fluorophenyl)propan-1-ol [(*R*)-6c]**

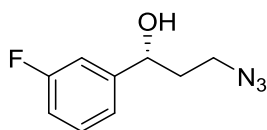

Prepared according to the general procedure: 100 mL PB buffer (50 mM, pH 7.5) containing 20 mM **6b** (2 mmol), 20 mM  $\text{NaN}_3$  (2 mmol) and 10 g dcw/L *E. coli* (HheD8-M4) cells, 30 °C, reaction for 12 h. The crude product was purified by flash column chromatography on silica gel (petroleum ether : ethyl acetate = 30:1 ~ 10:1) to provide (*R*)-**6c** as a light yellow liquid in 47% yield (183.6 mg).  **$^1\text{H}$  NMR (400 MHz,  $\text{DMSO}-d_6$ )**  $\delta$  7.37 (dd,  $J = 14.2, 8.2$  Hz, 1H), 7.20 - 7.12 (m, 2H), 7.05 (td,  $J = 8.8, 2.6$  Hz, 1H), 5.54 (d,  $J = 4.8$  Hz, 1H), 4.66 (dt,  $J = 8.9, 5.0$  Hz, 1H), 3.49 - 3.40 (m, 1H), 3.39 - 3.33 (m, 1H), 1.90 - 1.75 (m, 2H).  **$^{13}\text{C}$  NMR (100 MHz,  $\text{DMSO}-d_6$ )**  $\delta$  162.3 (d,  $J = 243.2$  Hz), 148.8 (d,  $J = 6.6$  Hz), 130.1 (d,  $J = 8.1$  Hz), 121.7 (d,  $J = 2.6$  Hz), 113.6 (d,  $J = 21.0$  Hz), 112.3 (d,  $J = 21.6$  Hz), 68.9, 47.7, 37.9.  $[\alpha]_{\text{D}}^{25} = +28.98$  ( $c = 1.00$ ,  $\text{CH}_2\text{Cl}_2$ ). **HPLC analysis** (OX-3, 1% IPA in *n*-hexane, 0.5 ml/min,  $\lambda = 210$  nm) indicated >99% *ee*:  $t_{(S)}$  (minor) = 52.4 min,  $t_{(R)}$  (major) = 58.7 min. **HRMS (ESI)**  $m/z$ : calculated for  $\text{C}_9\text{H}_{11}\text{FN}_3\text{O}$   $[\text{M}+\text{H}]^+$ : 196.0886, found: 196.0892.

**(*S*)-2-(3-chlorophenyl)oxetane [(*S*)-7b]**

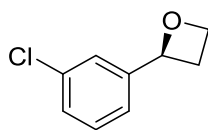

Prepared according to the general procedure: 100 mL PB buffer (50 mM, pH 7.5) containing 20 mM **7b** (2 mmol), 20 mM  $\text{NaN}_3$  (2 mmol) and 10 g dcw/L *E. coli* (HheD8-M4) cells, 30 °C, reaction for 24 h. The crude product was purified by flash column chromatography on silica gel (petroleum ether : ethyl acetate = 30:1) to provide (*S*)-**7b** as a light yellow liquid in 46% yield (167.2 mg).  **$^1\text{H}$  NMR (400 MHz,  $\text{CDCl}_3$ )**  $\delta$  7.46 (s, 1H), 7.33 - 7.23 (m, 3H), 5.76 (t,  $J = 7.5$  Hz, 1H), 4.81 (td,  $J = 8.2, 6.1$  Hz, 1H), 4.64 (dt,  $J = 9.2, 6.0$  Hz, 1H), 3.07 - 2.97 (m, 1H), 2.65 - 2.54 (m, 1H).  **$^{13}\text{C}$  NMR (100 MHz,  $\text{CDCl}_3$ )**  $\delta$  145.8, 134.4, 129.8, 127.8, 125.3, 123.2, 82.0, 68.3, 30.6.  $[\alpha]_{\text{D}}^{25} = -151.90$  ( $c = 1.00$ ,  $\text{CH}_2\text{Cl}_2$ ). **HPLC analysis** (OX-3, 1% IPA in *n*-hexanes, 0.5 ml/min,  $\lambda = 210$  nm) indicated 94% *ee*:  $t_{(S)}$  (major) = 14.2 min,  $t_{(R)}$  (minor) = 16.6 min. **HRMS (ESI)**  $m/z$ : calculated for  $\text{C}_9\text{H}_{10}\text{ClO}$   $[\text{M}+\text{H}]^+$ : 169.0420, found: 169.0419.

### (*R*)-3-azido-1-(3-chlorophenyl)propan-1-ol [(*R*)-7c]

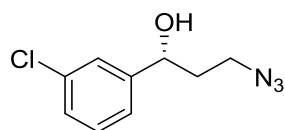

Prepared according to the general procedure: 100 mL PB buffer (50 mM, pH 7.5) containing 20 mM **7b** (2 mmol), 20 mM **NaN<sub>3</sub>** (2 mmol) and 10 g dcw/L *E. coli* (HheD8-M4) cells, 30 °C, reaction for 24 h. The crude product was purified by flash column chromatography on silica gel (petroleum ether : ethyl acetate = 30:1 ~ 10:1) to provide (*R*)-**7c** as a light yellow liquid in 47% yield (212.0 mg). **<sup>1</sup>H NMR (400 MHz, DMSO-*d*<sub>6</sub>)** δ 7.39 - 7.34 (m, 2H), 7.31 - 7.28 (m, 2H), 5.54 (d, *J* = 4.7 Hz, 1H), 4.64 (dt, *J* = 8.8, 4.8 Hz, 1H), 3.50 - 3.38 (m, 1H), 3.40 - 3.30 (m, 2H), 1.89 - 1.74 (m, 2H). **<sup>13</sup>C NMR (100 MHz, DMSO-*d*<sub>6</sub>)** δ 148.3, 133.1, 130.0, 126.8, 125.6, 124.4, 69.0, 47.8, 38.0. [ $\alpha$ ]<sub>D</sub><sup>25</sup> = + 26.08 (c = 1.00, CH<sub>2</sub>Cl<sub>2</sub>). **HPLC analysis** (OX-3, 3% IPA in *n*-hexane, 0.7 ml/min, λ = 210 nm) indicated 97% *ee*: *t*<sub>(S)</sub> (minor) = 13.7 min, *t*<sub>(R)</sub> (major) = 14.8 min. **HRMS (ESI)** *m/z*: calculated for C<sub>9</sub>H<sub>11</sub>ClN<sub>3</sub>O [M+H]<sup>+</sup>: 212.0591, found: 212.0589.

### (*S*)-2-(3-bromophenyl)oxetane [(*S*)-8b]

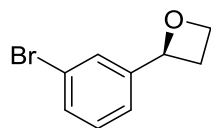

Prepared according to the general procedure: 100 mL PB buffer (50 mM, pH 7.5) containing 20 mM **8b** (2 mmol), 20 mM **NaN<sub>3</sub>** (2 mmol) and 10 g dcw/L *E. coli* (HheD8-M4) cells, 30 °C, reaction for 23 h. The crude product was purified by flash column chromatography on silica gel (petroleum ether : ethyl acetate = 30:1) to provide (*S*)-**8b** as a light yellow liquid in 48% yield (204.1 mg). **<sup>1</sup>H NMR (400 MHz, CDCl<sub>3</sub>)** δ 7.60 (s, 1H), 7.40 (dd, *J* = 8.0, 1.8 Hz, 1H), 7.30 (d, *J* = 7.6 Hz, 1H), 7.22 (t, *J* = 7.8 Hz, 1H), 5.74 (t, *J* = 7.5 Hz, 1H), 4.80 (td, *J* = 7.0, 5.4 Hz, 1H), 4.62 (dt, *J* = 9.3, 5.8 Hz, 1H), 3.07 - 2.94 (m, 1H), 2.65 - 2.51 (m, 1H). **<sup>13</sup>C NMR (100 MHz, CDCl<sub>3</sub>)** δ 146.0, 130.7, 130.1, 128.2, 123.7, 122.7, 81.9, 68.3, 30.6. [ $\alpha$ ]<sub>D</sub><sup>25</sup> = -121.31 (c = 1.00, CH<sub>2</sub>Cl<sub>2</sub>). **HPLC analysis** (OX-3, 1% IPA in *n*-hexane, 0.5 ml/min, λ = 210 nm) indicated 95% *ee*: *t*<sub>(S)</sub> (major) = 14.7 min, *t*<sub>(R)</sub> (minor) = 17.9 min. **HRMS (ESI)** *m/z*: calculated for C<sub>9</sub>H<sub>9</sub>BrNaO [M+Na]<sup>+</sup>: 234.9734, found: 234.9728.

### (*R*)-3-azido-1-(3-bromophenyl)propan-1-ol [(*R*)-8c]

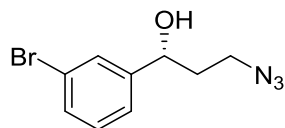

Prepared according to the general procedure: 100 mL PB buffer (50 mM, pH 7.5) containing 20 mM **8b** (2 mmol), 20 mM **NaN<sub>3</sub>** (2 mmol) and 10 g dcw/L *E. coli* (HheD8-M4) cells, 30 °C, reaction for 23 h. The crude product was purified by flash column chromatography on silica gel (petroleum ether : ethyl acetate



= 30:1 ~ 10:1) to provide (*R*)-**8c** as a light yellow liquid in 48% yield (245.1 mg). **<sup>1</sup>H NMR (400 MHz, DMSO-*d*<sub>6</sub>)** δ 7.53 (s, 1H), 7.43 (d, *J* = 7.6 Hz, 1H), 7.35 - 7.26 (m, 2H), 5.54 (d, *J* = 4.7 Hz, 1H), 4.63 (dt, *J* = 8.8, 4.9 Hz, 1H), 3.49 - 3.39 (m, 1H), 3.39 - 3.31 (m, 1H), 1.88 - 1.74 (m, 2H). **<sup>13</sup>C NMR (100 MHz, DMSO-*d*<sub>6</sub>)** δ 148.5, 130.4, 129.7, 128.4, 124.8, 121.6, 68.9, 47.7, 37.9. **[α]<sub>D</sub><sup>25</sup>** = + 22.78 (*c* = 1.00, CH<sub>2</sub>Cl<sub>2</sub>). **HPLC analysis** (OX-3, 3% IPA in *n*-hexane, 0.7 ml/min, λ = 210 nm) indicated 95% *ee*: *t*<sub>(S)</sub> (minor) = 13.9 min, *t*<sub>(R)</sub> (major) = 15.2 min. **HRMS (ESI) *m/z***: calculated for C<sub>9</sub>H<sub>10</sub>BrN<sub>3</sub>NaO [*M*+Na]<sup>+</sup>: 277.9905, found: 277.9906.

### (*S*)-2-(*m*-tolyl)oxetane [(*S*)-**9b**]

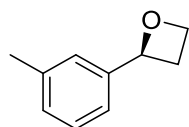

Prepared according to the general procedure: 100 mL PB buffer (50 mM, pH 7.5) containing 20 mM **9b** (2 mmol), 20 mM NaN<sub>3</sub> (2 mmol) and 10 g dcw/L *E. coli* (HheD8-M4) cells, 30 °C, reaction for 24 h. The crude product was purified by flash column chromatography on silica gel (petroleum ether : ethyl acetate = 30:1) to provide (*S*)-**9b** as a light yellow liquid in 37% yield (114.2 mg). **<sup>1</sup>H NMR (400 MHz, CDCl<sub>3</sub>)** δ 7.39 - 7.35 (m, 2H), 7.31 (d, *J* = 7.7 Hz, 1H), 7.20 (d, *J* = 7.4 Hz, 1H), 5.87 (t, *J* = 7.6 Hz, 1H), 4.91 (td, *J* = 8.2, 6.0 Hz, 1H), 4.74 (dt, *J* = 9.3, 5.7 Hz, 1H), 3.12 - 3.04 (m, 1H), 2.78 - 2.70 (m, 1H), 2.47 (s, 3H). **<sup>13</sup>C NMR (100 MHz, CDCl<sub>3</sub>)** δ 143.5, 138.2, 128.6, 128.4, 125.9, 122.3, 83.0, 68.2, 30.7, 21.5. **[α]<sub>D</sub><sup>25</sup>** = -118.21 (*c* = 1.00, CH<sub>2</sub>Cl<sub>2</sub>). **HPLC analysis** (OX-3, 3% IPA in *n*-hexane, 0.7 ml/min, λ = 210 nm) indicated 94% *ee*: *t*<sub>(S)</sub> (major) = 9.1 min, *t*<sub>(R)</sub> (minor) = 10.6 min. **HRMS (ESI) *m/z***: calculated for C<sub>10</sub>H<sub>12</sub>NaO [*M*+Na]<sup>+</sup>: 171.0786, found: 171.0785.

### (*R*)-3-azido-1-(*m*-tolyl)propan-1-ol [(*R*)-**9c**]

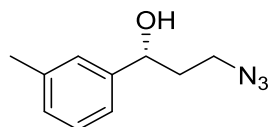

Prepared according to the general procedure: 100 mL PB buffer (50 mM, pH 7.5) containing 20 mM **9b** (2 mmol), 20 mM NaN<sub>3</sub> (2 mmol) and 10 g dcw/L *E. coli* (HheD8-M4) cells, 30 °C, reaction for 24 h. The crude product was purified by flash column chromatography on silica gel (petroleum ether : ethyl acetate = 30:1 ~ 10:1) to provide (*R*)-**9c** as a yellow liquid in 48% yield (190.4 mg). **<sup>1</sup>H NMR (400 MHz, DMSO-*d*<sub>6</sub>)** δ 7.21 (t, *J* = 7.5 Hz, 1H), 7.13 (t, *J* = 10.5 Hz, 2H), 7.05 (d, *J* = 7.4 Hz, 1H), 5.36 (d, *J* = 4.5 Hz, 1H), 4.59 (dt, *J* = 7.1, 5.6 Hz, 1H), 3.48 - 3.39 (m, 1H), 3.37 - 3.31 (m, 1H), 2.30 (s, 3H), 1.81 (q, *J* = 6.9 Hz, 2H). **<sup>13</sup>C NMR (100 MHz, DMSO-*d*<sub>6</sub>)** δ 145.6, 137.2, 128.1, 127.6, 126.3, 122.8, 69.5, 47.9, 38.2, 21.2. **[α]<sub>D</sub><sup>25</sup>** = + 22.78 (*c* = 1.00, CH<sub>2</sub>Cl<sub>2</sub>). **HPLC analysis** (OX-3,

3% IPA in *n*-hexane, 0.7 ml/min,  $\lambda$  = 210 nm) indicated 98% *ee*:  $t_{(S)}$  (minor) = 14.0 min,  $t_{(R)}$  (major) = 15.2 min. **HRMS (ESI)**  $m/z$ : calculated for  $C_{10}H_{13}N_3NaO$   $[M+Na]^+$ : 214.0956, found: 214.0963.

### (*S*)-2-(3-methoxyphenyl)oxetane [(*S*)-10b]

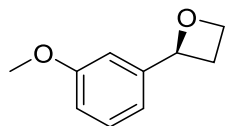

Prepared according to the general procedure: 100 mL PB buffer (50 mM, pH 7.5) containing 20 mM **10b** (2 mmol), 20 mM **NaN<sub>3</sub>** (2 mmol) and 10 g dcw/L *E. coli* (HheD8-M4) cells, 30 °C, reaction for 24 h. The crude product was purified by flash column chromatography on silica gel (petroleum ether : ethyl acetate = 30:1) to provide (*S*)-**10b** as a colorless liquid in 42% yield (136.8 mg). **<sup>1</sup>H NMR (400 MHz, CDCl<sub>3</sub>)**  $\delta$  7.31 (t,  $J$  = 7.9 Hz, 1H), 7.06 - 6.97 (m, 2H), 6.85 (ddd,  $J$  = 8.2, 2.7, 1.1 Hz, 1H), 5.80 (t,  $J$  = 7.5 Hz, 1H), 4.83 (td,  $J$  = 8.1, 6.0 Hz, 1H), 4.66 (dt,  $J$  = 9.2, 5.8 Hz, 1H), 3.84 (s, 3H), 3.07 - 2.97 (m, 1H), 2.70 - 2.60 (m, 1H). **<sup>13</sup>C NMR (100 MHz, CDCl<sub>3</sub>)**  $\delta$  159.9, 145.4, 129.6, 117.3, 113.4, 110.5, 82.8, 68.3, 55.3, 30.7.  $[\alpha]_D^{25}$  = -120.02 ( $c$  = 1.00, CH<sub>2</sub>Cl<sub>2</sub>). **HPLC analysis** (OX-3, 3% IPA in *n*-hexane, 0.7 ml/min,  $\lambda$  = 210 nm) indicated 95% *ee*:  $t_{(S)}$  (major) = 14.2 min,  $t_{(R)}$  (minor) = 20.6 min. **HRMS (ESI)**  $m/z$ : calculated for  $C_{10}H_{12}NaO_2$   $[M+Na]^+$ : 187.0735, found: 187.0739.

### (*R*)-3-azido-1-(3-methoxyphenyl)propan-1-ol [(*R*)-10c]

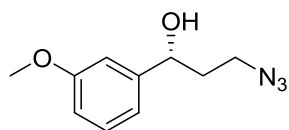

Prepared according to the general procedure: 100 mL PB buffer (50 mM, pH 7.5) containing 20 mM **10b** (2 mmol), 20 mM **NaN<sub>3</sub>** (2 mmol) and 10 g dcw/L *E. coli* (HheD8-M4) cells, 30 °C, reaction for 24 h. The crude product was purified by flash column chromatography on silica gel (petroleum ether : ethyl acetate = 30:1 ~ 10:1) to provide (*R*)-**10c** as a light yellow liquid in 43% yield (178.5 mg). **<sup>1</sup>H NMR (400 MHz, DMSO-*d*<sub>6</sub>)**  $\delta$  7.25 (t,  $J$  = 7.8 Hz, 1H), 6.98 - 6.87 (m, 2H), 6.81 (dd,  $J$  = 8.2, 2.7 Hz, 1H), 5.44 (d,  $J$  = 4.5 Hz, 1H), 4.63 (q,  $J$  = 5.7 Hz, 1H), 3.75 (s, 3H), 3.49 - 3.41 (m, 1H), 3.40 - 3.31 (m, 1H), 1.84 (q,  $J$  = 6.8 Hz, 2H). **<sup>13</sup>C NMR (100 MHz, DMSO-*d*<sub>6</sub>)**  $\delta$  159.3, 147.4, 129.3, 117.9, 112.4, 111.2, 69.5, 55.0, 47.9, 38.2.  $[\alpha]_D^{25}$  = + 30.79 ( $c$  = 1.00, CH<sub>2</sub>Cl<sub>2</sub>). **HPLC analysis** (OX-3, 3% IPA in *n*-hexane, 0.7 ml/min,  $\lambda$  = 210 nm) indicated 95% *ee*:  $t_{(S)}$  (minor) = 26.4 min,  $t_{(R)}$  (major) = 28.3 min. **HRMS (ESI)**  $m/z$ : calculated for  $C_{10}H_{13}N_3NaO_2$   $[M+Na]^+$ : 230.0905, found: 230.0907.

### (S)-2-(4-fluorophenyl)oxetane [(S)-11b]

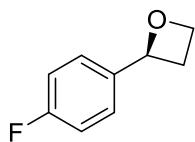

Prepared according to the general procedure: 100 mL PB buffer (50 mM, pH 7.5) containing 20 mM **11b** (2 mmol), 20 mM **NaN<sub>3</sub>** (2 mmol) and 10 g dcw/L *E. coli* (HheD8-M4) cells, 30 °C, reaction for 16 h. The crude product was purified by flash column chromatography on silica gel (petroleum ether : ethyl acetate = 30:1) to provide (S)-**11b** as a yellow liquid in 36% yield (109.9 mg). **<sup>1</sup>H NMR (400 MHz, CDCl<sub>3</sub>)** δ 7.48 - 7.36 (m, 2H), 7.07 (t, *J* = 8.7 Hz, 2H), 5.78 (t, *J* = 7.5 Hz, 1H), 4.82 (td, *J* = 8.0, 6.2 Hz, 1H), 4.64 (dt, *J* = 9.3, 5.7 Hz, 1H), 3.07 - 2.94 (m, 1H), 2.70 - 2.57 (m, 1H). **<sup>13</sup>C NMR (100 MHz, CDCl<sub>3</sub>)** δ 162.5 (d, *J* = 245.9 Hz), 139.4 (d, *J* = 3.1 Hz), 127.2 (d, *J* = 8.1 Hz), 115.4 (d, *J* = 21.4 Hz), 82.4, 68.2, 30.9. [ $\alpha$ ]<sub>D</sub><sup>25</sup> = -148.89 (c = 1.00, CH<sub>2</sub>Cl<sub>2</sub>). **HPLC analysis** (OX-3, 1% IPA in *n*-hexane, 0.5 ml/min,  $\lambda$  = 210 nm) indicated 99% *ee*: *t*<sub>(S)</sub> (major) = 15.2 min, *t*<sub>(R)</sub> (minor) = 17.2 min. **HRMS (ESI)** *m/z*: calculated for C<sub>9</sub>H<sub>10</sub>FO [M+H]<sup>+</sup>: 157.0716, found: 157.0712.

### (R)-3-azido-1-(4-fluorophenyl)propan-1-ol [(R)-11c]

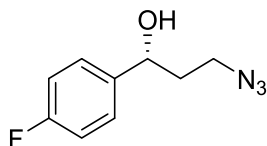

Prepared according to the general procedure: 100 mL PB buffer (50 mM, pH 7.5) containing 20 mM **11b** (2 mmol), 20 mM **NaN<sub>3</sub>** (2 mmol) and 10 g dcw/L *E. coli* (HheD8-M4) cells, 30 °C, reaction for 16 h. The crude product was purified by flash column chromatography on silica gel (petroleum ether : ethyl acetate = 30:1 ~ 10:1) to provide (R)-**11c** as a light yellow liquid in 50% yield (194.1 mg). **<sup>1</sup>H NMR (400 MHz, DMSO-*d*<sub>6</sub>)** δ 7.37 (dd, *J* = 8.4, 5.7 Hz, 2H), 7.14 (t, *J* = 8.8 Hz, 2H), 5.46 (d, *J* = 4.5 Hz, 1H), 4.64 (q, *J* = 6.5 Hz, 1H), 3.48 - 3.39 (m, 1H), 3.39 - 3.30 (m, 1H), 1.81 (q, *J* = 6.7 Hz, 2H). **<sup>13</sup>C NMR (100 MHz, DMSO-*d*<sub>6</sub>)** δ 161.2 (d, *J* = 242.2 Hz), 141.8 (d, *J* = 3.0 Hz), 127.6 (d, *J* = 8.0 Hz), 114.8 (d, *J* = 21.0 Hz), 68.9, 47.8, 38.1. [ $\alpha$ ]<sub>D</sub><sup>25</sup> = + 31.28 (c = 1.00, CH<sub>2</sub>Cl<sub>2</sub>). **HPLC analysis** (OX-3, 3% IPA in *n*-hexane, 0.7 ml/min,  $\lambda$  = 210 nm) indicated 98% *ee*: *t*<sub>(S)</sub> (minor) = 13.9 min, *t*<sub>(R)</sub> (major) = 15.3 min. **HRMS (ESI)** *m/z*: calculated for C<sub>9</sub>H<sub>11</sub>FN<sub>3</sub>O [M+H]<sup>+</sup>: 196.0886, found: 196.0885.

### (S)-2-(4-chlorophenyl)oxetane [(S)-12b]

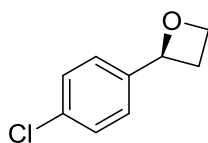

Prepared according to the general procedure: 100 mL PB buffer (50 mM, pH 7.5) containing 20 mM **12b** (2 mmol), 20 mM **NaN<sub>3</sub>** (2 mmol) and 10 g dcw/L *E. coli* (HheD8-M4) cells, 30 °C, reaction for 11 h. The crude product was purified by flash column chromatography on silica gel (petroleum ether : ethyl

acetate = 30:1) to provide (*S*)-**12b** as a light yellow liquid in 45% yield (164.4 mg). **<sup>1</sup>H NMR (400 MHz, CDCl<sub>3</sub>)** δ 7.39 - 7.29 (m, 4H), 5.76 (t, *J* = 7.5 Hz, 1H), 4.80 (td, *J* = 8.0, 5.8 Hz, 1H), 4.62 (dt, *J* = 9.2, 5.8 Hz, 1H), 3.04 - 2.95 (m, 1H), 2.63 - 2.54 (m, 1H). **<sup>13</sup>C NMR (100 MHz, CDCl<sub>3</sub>)** δ 142.1, 133.4, 128.6, 126.6, 82.1, 68.2, 30.7. **[α]<sub>D</sub><sup>25</sup>** = -144.40 (*c* = 1.00, CH<sub>2</sub>Cl<sub>2</sub>). **HPLC analysis** (OX-3, 3% IPA in *n*-hexane, 0.7 ml/min, λ = 210 nm) indicated 97% *ee*: *t*<sub>(S)</sub> (major) = 8.3 min, *t*<sub>(R)</sub> (minor) = 8.9 min. **HRMS (ESI)** *m/z*: calculated for C<sub>9</sub>H<sub>9</sub>ClNaO [M+Na]<sup>+</sup>: 191.0240, found: 191.0241.

### (*R*)-3-azido-1-(4-chlorophenyl)propan-1-ol [(*R*)-**12c**]

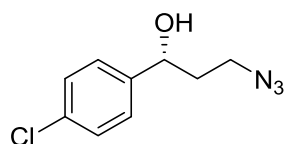

Prepared according to the general procedure: 100 mL PB buffer (50 mM, pH 7.5) containing 20 mM **12b** (2 mmol), 20 mM NaN<sub>3</sub> (2 mmol) and 10 g dcw/L *E. coli* (HheD8-M4) cells, 30 °C, reaction for 11 h. The crude product was purified by flash column chromatography on silica gel (petroleum ether : ethyl acetate = 30:1 ~ 10:1) to provide (*R*)-**12c** as a light yellow liquid in 48% yield (216.7 mg). **<sup>1</sup>H NMR (400 MHz, DMSO-*d*<sub>6</sub>)** δ 7.37 (d, *J* = 2.2 Hz, 4H), 5.54 (d, *J* = 4.7 Hz, 1H), 4.67 (q, *J* = 6.2 Hz, 1H), 3.51 - 3.41 (m, 1H), 3.41 - 3.30 (m, 1H), 1.83 (q, *J* = 6.4 Hz, 2H). **<sup>13</sup>C NMR (100 MHz, DMSO-*d*<sub>6</sub>)** δ 144.6, 131.5, 128.1, 127.6, 68.9, 47.8, 38.1. **[α]<sub>D</sub><sup>25</sup>** = + 21.69 (*c* = 1.00, CH<sub>2</sub>Cl<sub>2</sub>). **HPLC analysis** (OX-3, 3% IPA in *n*-hexane, 0.7 ml/min, λ = 210 nm) indicated 99% *ee*: *t*<sub>(S)</sub> (minor) = 15.2 min, *t*<sub>(R)</sub> (major) = 16.5 min. **HRMS (ESI)** *m/z*: calculated for C<sub>9</sub>H<sub>11</sub>ClN<sub>3</sub>O [M+H]<sup>+</sup>: 212.0591, found: 212.0594.

### (*S*)-2-(4-bromophenyl)oxetane [(*S*)-**13b**]

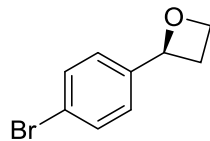

Prepared according to the general procedure: 100 mL PB buffer (50 mM, pH 7.5) containing 20 mM **13b** (2 mmol), 20 mM NaN<sub>3</sub> (2 mmol) and 10 g dcw/L *E. coli* (HheD8-M4) cells, 30 °C, reaction for 26 h. The crude product was purified by flash column chromatography on silica gel (petroleum ether : ethyl acetate = 30:1) to provide (*S*)-**13b** as a light yellow liquid in 42% yield (177.9mg). **<sup>1</sup>H NMR (400 MHz, CDCl<sub>3</sub>)** δ 7.55 - 7.47 (m, 2H), 7.35 - 7.27 (m, 2H), 5.75 (t, *J* = 7.5 Hz, 1H), 4.82 (td, *J* = 8.0, 5.8 Hz, 1H), 4.64 (dt, *J* = 9.3, 5.8 Hz, 1H), 3.08 - 2.95 (m, 1H), 2.66 - 2.53 (m, 1H). **<sup>13</sup>C NMR (100 MHz, CDCl<sub>3</sub>)** δ 142.7, 131.6, 127.0, 121.6, 82.2, 68.3, 30.8. **[α]<sub>D</sub><sup>25</sup>** = -129.83 (*c* = 1.00, CH<sub>2</sub>Cl<sub>2</sub>). **HPLC analysis** (OX-3, 1% IPA in *n*-hexane, 0.5 ml/min, λ = 210 nm) indicated 98% *ee*:

$t_{(S)}$  (major) = 16.0 min,  $t_{(R)}$  (minor) = 17.8 min. **HRMS (ESI)**  $m/z$ : calculated for  $C_9H_{10}BrO$   $[M+H]^+$ : 212.9915, found: 212.9915.

**(*R*)-3-azido-1-(4-bromophenyl)propan-1-ol [(*R*)-13c]**

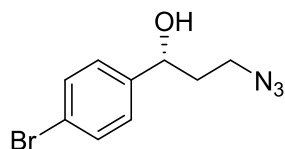

Prepared according to the general procedure: 100 mL PB buffer (50 mM, pH 7.5) containing 20 mM **13b** (2 mmol), 20 mM  $NaN_3$  (2 mmol) and 10 g dcw/L *E. coli* (HheD8-M4) cells, 30 °C, reaction for 26 h. The crude product was purified by flash column chromatography on silica gel (petroleum ether : ethyl acetate = 30:1 ~ 10:1) to provide (*R*)-**13c** as a light yellow liquid in 47% yield (240.0 mg).  **$^1H$  NMR (400 MHz, DMSO- $d_6$ )**  $\delta$  7.51 (dd,  $J$  = 8.4, 1.5 Hz, 2H), 7.31 (d,  $J$  = 7.6 Hz, 2H), 5.52 (d,  $J$  = 4.6 Hz, 1H), 4.64 (q,  $J$  = 5.9 Hz, 1H), 3.49 - 3.40 (m, 1H), 3.40 - 3.31 (m, 1H), 1.81 (q,  $J$  = 6.8 Hz, 2H).  **$^{13}C$  NMR (100 MHz, DMSO- $d_6$ )**  $\delta$  145.0, 131.0, 128.0, 119.9, 68.9, 47.7, 38.0.  $[\alpha]_D^{25}$  = + 28.68 ( $c$  = 1.00,  $CH_2Cl_2$ ). **HPLC analysis** (OX-3, 3% IPA in *n*-hexane, 0.7 ml/min,  $\lambda$  = 210 nm) indicated 98% *ee*:  $t_{(S)}$  (minor) = 17.2 min,  $t_{(R)}$  (major) = 18.3 min. **HRMS (ESI)**  $m/z$ : calculated for  $C_9H_{11}BrN_3O$   $[M+H]^+$ : 256.0085, found: 256.0080.

**(*S*)-2-(4-(trifluoromethyl)phenyl)oxetane [(*S*)-14b]**

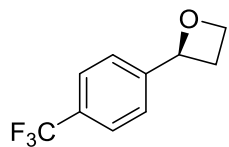

Prepared according to the general procedure: 100 mL PB buffer (50 mM, pH 7.5) containing 5 mM **14b** (0.5 mmol), 5 mM  $NaN_3$  (0.5 mmol) and 10 g dcw/L *E. coli* (HheD8-M4) cells, 30 °C, reaction for 45 h. The crude product was purified by flash column chromatography on silica gel (petroleum ether : ethyl acetate = 30:1) to provide (*S*)-**14b** as a light yellow liquid in 49% yield (52.0 mg).  **$^1H$  NMR (400 MHz,  $CDCl_3$ )**  $\delta$  7.64 (d,  $J$  = 8.0 Hz, 2H), 7.54 (d,  $J$  = 8.1 Hz, 2H), 5.86 (t,  $J$  = 7.6 Hz, 1H), 4.85 (td,  $J$  = 8.0, 6.0 Hz, 1H), 4.67 (dt,  $J$  = 9.2, 5.5 Hz, 1H), 3.13 - 3.02 (m, 1H), 2.66 - 2.55 (m, 1H).  **$^{13}C$  NMR (100 MHz,  $CDCl_3$ )**  $\delta$  147.8, 129.9 (q,  $J$  = 32.0 Hz), 125.6 (q,  $J$  = 4.0 Hz), 125.3, 124.3 (q,  $J$  = 270.0 Hz), 82.1, 68.5, 30.7.  $[\alpha]_D^{25}$  = -94.33 ( $c$  = 1.00,  $CH_2Cl_2$ ). **HPLC analysis** (OX-3, 3% IPA in *n*-hexane, 0.7 ml/min,  $\lambda$  = 210 nm) indicated 86% *ee*:  $t_{(S)}$  (major) = 6.6 min,  $t_{(R)}$  (minor) = 7.0 min. **HRMS (ESI)**  $m/z$ : calculated for  $C_{10}H_{10}F_3O$   $[M+H]^+$ : 203.0684, found: 203.0683.

**(R)-3-azido-1-(4-(trifluoromethyl)phenyl)propan-1-ol [(R)-14c]**

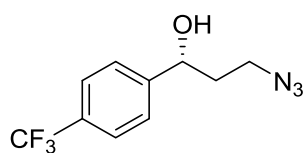

Prepared according to the general procedure: 100 mL PB buffer (50 mM, pH 7.5) containing 5 mM **14b** (0.5 mmol), 5 mM **NaN<sub>3</sub>** (0.5 mmol) and 10 g dcw/L *E. coli* (HheD8-M4) cells, 30 °C, reaction for 45 h. The crude product was purified by flash column chromatography on silica gel (petroleum ether : ethyl acetate = 30:1 ~ 10:1) to provide (*R*)-**14c** as a light yellow liquid in 41% yield (53.5 mg). **<sup>1</sup>H NMR (400 MHz, DMSO-*d*<sub>6</sub>)** δ 7.69 (d, *J* = 8.1 Hz, 2H), 7.57 (d, *J* = 8.0 Hz, 2H), 5.63 (d, *J* = 3.8 Hz, 1H), 4.73 (t, *J* = 6.7 Hz, 1H), 3.51 - 3.42 (m, 1H), 3.40 - 3.35 (m, 1H), 1.89 - 1.78 (m, 2H). **<sup>13</sup>C NMR (100 MHz, DMSO-*d*<sub>6</sub>)** δ 150.4, 127.6 (q, *J* = 32.0 Hz), 126.5, 125.0 (q, *J* = 4.0 Hz), 124.4 (d, *J* = 270.0 Hz), 69.0, 47.7, 37.9. [ $\alpha$ ]<sub>D</sub><sup>25</sup> = + 17.49 (*c* = 1.00, CH<sub>2</sub>Cl<sub>2</sub>). **HPLC analysis** (OX-3, 3% IPA in *n*-hexane, 0.7 ml/min,  $\lambda$  = 210 nm) indicated 94% *ee*: *t*<sub>(S)</sub> (minor) = 10.5 min, *t*<sub>(R)</sub> (major) = 11.3 min. **HRMS (ESI)** *m/z*: calculated for C<sub>10</sub>H<sub>11</sub>F<sub>3</sub>N<sub>3</sub>O [*M*+H]<sup>+</sup>: 246.0854, found: 246.0860.

**(S)-2-(3,5-difluorophenyl)oxetane [(S)-15b]**

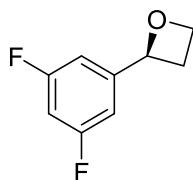

Prepared according to the general procedure: 100 mL PB buffer (50 mM, pH 7.5) containing 20 mM **15b** (2 mmol), 20 mM **NaN<sub>3</sub>** (2 mmol) and 10 g dcw/L *E. coli* (HheD8-M4) cells, 30 °C, reaction for 16 h. The crude product was purified by flash column chromatography on silica gel (petroleum ether : ethyl acetate = 30:1) to provide (*S*)-**15b** as a light yellow liquid in 42% yield (158.7mg). **<sup>1</sup>H NMR (400 MHz, CDCl<sub>3</sub>)** δ 6.94 (dd, *J* = 8.6, 2.2 Hz, 2H), 6.71 (td, *J* = 8.9, 2.2 Hz, 1H), 5.75 (t, *J* = 7.5 Hz, 1H), 4.82 (td, *J* = 8.2, 6.0 Hz, 1H), 4.65 (dt, *J* = 9.3, 6.0 Hz, 1H), 3.10 - 3.02 (m, 1H), 2.61 - 2.53 (m, 1H). **<sup>13</sup>C NMR (100 MHz, CDCl<sub>3</sub>)** δ 163.3 (dd, *J* = 247.0, 12.0 Hz), 148.0 (t, *J* = 8.0 Hz), 107.8 (dd, *J* = 27.0, 4.0 Hz), 103.0 (td, *J* = 25.0, 6.0 Hz), 81.7, 68.6, 30.6. [ $\alpha$ ]<sub>D</sub><sup>25</sup> = -142.89 (*c* = 1.00, CH<sub>2</sub>Cl<sub>2</sub>). **HPLC analysis** (IA-3, 1% IPA in *n*-hexane, 0.5 ml/min,  $\lambda$  = 210 nm) indicated >99% *ee*: *t*<sub>(R)</sub> (minor) = 13.0 min, *t*<sub>(S)</sub> (major) = 13.8 min,. **HRMS (ESI)** *m/z*: calculated for C<sub>9</sub>H<sub>8</sub>F<sub>2</sub>NaO [*M*+Na]<sup>+</sup>: 193.0441, found: 193.0444.

**(R)-3-azido-1-(3,5-difluorophenyl)propan-1-ol [(R)-15c]**

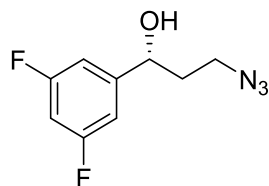

Prepared according to the general procedure: 100 mL PB buffer (50 mM, pH 7.5) containing 20 mM **15b** (2 mmol), 20 mM **NaN<sub>3</sub>** (2 mmol) and 10 g dcw/L *E. coli* (HheD8-M4) cells, 30 °C, reaction for 16 h. The crude product was purified by flash column chromatography on silica gel (petroleum ether : ethyl acetate = 30:1 ~ 15:1) to provide **(R)-15c** as a light yellow liquid in 43% yield (203.5 mg). **<sup>1</sup>H NMR (400 MHz, DMSO-*d*<sub>6</sub>)** δ 7.14 - 6.95 (m, 3H), 5.68 (d, *J* = 4.8 Hz, 1H), 4.67 (dt, *J* = 8.9, 4.6 Hz, 1H), 3.49- 3.41 (m, 1H), 3.40 - 3.32 (m, 1H), 1.91 - 1.73 (m, 2H). **<sup>13</sup>C NMR (100 MHz, DMSO-*d*<sub>6</sub>)** δ 162.4 (dd, *J* = 246.0, 13.0 Hz), 150.7 (t, *J* = 8.2 Hz), 108.7 (dd, *J* = 18.0, 6.0 Hz), 102.2 (t, *J* = 25.9 Hz), 68.6 (t, *J* = 2.2 Hz), 47.6, 37.6. **[α]<sub>D</sub><sup>25</sup>** = + 27.28 (c = 1.00, CH<sub>2</sub>Cl<sub>2</sub>). **HPLC analysis** (IC-3, 1% IPA in *n*-hexane, 0.5 ml/min, λ = 210 nm) indicated >99% *ee*: *t*<sub>(S)</sub> (minor) = 31.6 min, *t*<sub>(R)</sub> (major) = 35.1 min. **HRMS (ESI) *m/z***: calculated for C<sub>9</sub>H<sub>9</sub>F<sub>2</sub>N<sub>3</sub>NaO [M+Na]<sup>+</sup>: 236.0611, found: 236.0612.

**(S)-2-(naphthalen-2-yl)oxetane [(S)-16b]**

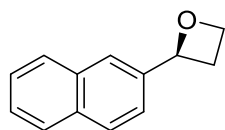

Prepared according to the general procedure: 100 mL PB buffer (50 mM, pH 7.5) containing 5 mM **16b** (0.5 mmol), 5 mM **NaN<sub>3</sub>** (0.5 mmol) and 10 g dcw/L *E. coli* (HheD8-M3) cells, 30 °C, reaction for 45 h. The crude product was purified by flash column chromatography on silica gel (petroleum ether : ethyl acetate = 40:1) to provide **(S)-16b** as a light yellow liquid in 35% yield (31.9mg). **<sup>1</sup>H NMR (400 MHz, CDCl<sub>3</sub>)** δ 7.95 - 7.89 (m, 1H), 7.86 (dt, *J* = 7.0, 1.3 Hz, 1H), 7.82 (d, *J* = 8.2 Hz, 1H), 7.70 - 7.64 (m, 1H), 7.60 - 7.55 (m, 1H), 7.54 - 7.49 (m, 2H), 6.50 (t, *J* = 7.6 Hz, 1H), 4.97 (td, *J* = 8.1, 6.0 Hz, 1H), 4.74 (dt, *J* = 9.0, 6.0 Hz, 1H), 3.35 - 3.25 (m, 1H), 2.75 - 2.64 (m, 1H). **<sup>13</sup>C NMR (100 MHz, CDCl<sub>3</sub>)** δ 139.2, 133.7, 129.1, 129.0, 127.7, 126.1, 125.8, 125.7, 122.8, 121.5, 80.9, 68.8, 30.2. **[α]<sub>D</sub><sup>25</sup>** = -288.19 (c = 1.00, CH<sub>2</sub>Cl<sub>2</sub>). **HPLC analysis** (OX-3, 3% IPA in *n*-hexane, 0.7 ml/min, λ = 210 nm) indicated 98% *ee*: *t*<sub>(S)</sub> (major) = 9.7 min, *t*<sub>(R)</sub> (minor) = 10.5 min. **HRMS (ESI) *m/z***: calculated for C<sub>13</sub>H<sub>13</sub>O [M+H]<sup>+</sup>: 185.0966, found: 185.0966.

### (*R*)-3-azido-1-(naphthalen-2-yl)propan-1-ol [(*R*)-16c]

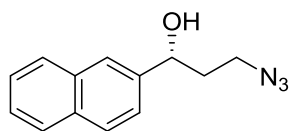

Prepared according to the general procedure: 100 mL PB buffer (50 mM, pH 7.5) containing 5 mM **16b** (0.5 mmol), 5 mM **NaN<sub>3</sub>** (0.5 mmol) and 10 g dcw/L *E. coli* (HheD8-M3) cells, 30 °C, reaction for 45 h. The crude product was purified by flash column chromatography on silica gel (petroleum ether : ethyl acetate = 40:1 ~ 15:1) to provide (*R*)-**16c** as a light yellow liquid in 43% yield (49.3 mg). **<sup>1</sup>H NMR (400 MHz, DMSO-*d*<sub>6</sub>)** δ 8.13 (d, *J* = 8.2 Hz, 1H), 7.94 (d, *J* = 7.5 Hz, 1H), 7.82 (d, *J* = 8.2 Hz, 1H), 7.67 (d, *J* = 7.0 Hz, 1H), 7.59 - 7.47 (m, 3H), 5.60 (t, *J* = 3.1 Hz, 1H), 5.42 (dd, *J* = 8.6, 4.0 Hz, 1H), 3.68 - 3.58 (m, 1H), 3.55 - 3.45 (m, 1H), 2.06 - 1.96 (m, 1H), 1.94 - 1.82 (m, 1H). **<sup>13</sup>C NMR (100 MHz, DMSO-*d*<sub>6</sub>)** δ 141.3, 133.3, 129.8, 128.7, 127.3, 126.0, 125.5, 123.1, 122.8, 66.4, 48.2, 37.6. **[α]<sub>D</sub><sup>25</sup>** = + 54.46 (c = 1.00, CH<sub>2</sub>Cl<sub>2</sub>). **HPLC analysis** (OX-3, 3% IPA in *n*-hexane, 0.7 ml/min, λ = 210 nm) indicated 95% *ee*: *t*<sub>(S)</sub> (minor) = 18.6 min, *t*<sub>(R)</sub> (major) = 21.2 min. **HRMS (ESI) *m/z***: calculated for C<sub>13</sub>H<sub>14</sub>N<sub>3</sub>O [M+H]<sup>+</sup>: 228.1137, found: 228.1135.

### (*S*)-2-methyl-2-phenyloxetane [(*S*)-17b]

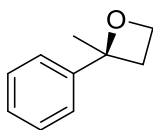

Prepared according to the general procedure: 100 mL Gly-NaOH buffer (300 mM, pH 9.5) containing 5 mM **17b** (0.5 mmol), 15 mM **NaN<sub>3</sub>** (1.5 mmol) and 30 g dcw/L *E. coli* (HheD8-M7) cells, 30 °C, reaction for 14 h. The crude product was purified by flash column chromatography on silica gel (petroleum ether : ethyl acetate = 80:1) to provide (*S*)-**17b** as a light yellow liquid in 27% yield (21.8mg). **<sup>1</sup>H NMR (400 MHz, CDCl<sub>3</sub>)** δ 7.44 - 7.37 (m, 4H), 7.30 - 7.26 (m, 1H), 4.65 (ddd, *J* = 12.5, 6.6, 5.9 Hz, 1H), 4.55 (ddd, *J* = 12.8, 6.8, 5.8 Hz, 1H), 2.86 - 2.73 (m, 2H), 1.76 (s, 3H). **<sup>13</sup>C NMR (100 MHz, CDCl<sub>3</sub>)** δ 148.3, 128.3, 126.7, 123.7, 86.7, 64.6, 35.6, 30.8. **[α]<sub>D</sub><sup>25</sup>** = -99.54 (c = 1.00, CH<sub>2</sub>Cl<sub>2</sub>). **HPLC analysis** (OX-3, 3% IPA in *n*-hexane, 0.7 ml/min, λ = 210 nm) indicated 85% *ee*: *t*<sub>(S)</sub> (major) = 6.7 min, *t*<sub>(R)</sub> (minor) = 7.7 min. **HRMS (ESI) *m/z***: calculated for C<sub>10</sub>H<sub>13</sub>O [M+H]<sup>+</sup>: 149.0966, found: 149.0964.

### (*R*)-4-azido-2-phenylbutan-2-ol [(*R*)-17c]

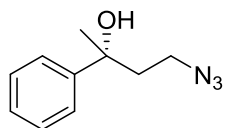

Prepared according to the general procedure: 100 mL Gly-NaOH buffer (300 mM, pH 9.5) containing 5 mM **17b** (0.5 mmol), 15 mM **NaN<sub>3</sub>** (1.5 mmol) and 30 g dcw/L *E. coli* (HheD8-M7) cells, 30 °C, reaction for 14 h. The crude product was purified by flash column chromatography on silica gel (petroleum ether : ethyl acetate



= 80:1 ~ 15:1) to provide (*R*)-**17c** as a light yellow liquid in 39% yield (39.8 mg). **<sup>1</sup>H NMR (400 MHz, DMSO-*d*<sub>6</sub>)** δ 7.46 - 7.44 (m, 2H), 7.31 (t, *J* = 7.4 Hz, 2H), 7.21 - 7.19 (m, 1H), 5.20 (s, 1H), 3.36 - 3.28 (m, 1H), 3.04 - 2.97 (m, 1H), 2.03 - 1.98 (m, 2H), 1.46 (s, 3H). **<sup>13</sup>C NMR (100 MHz, DMSO-*d*<sub>6</sub>)** δ 148.3, 127.9, 126.2, 124.8, 71.8, 46.9, 42.1, 30.5. [ $\alpha$ ]<sub>D</sub><sup>25</sup> = + 8.79 (*c* = 1.00, CH<sub>2</sub>Cl<sub>2</sub>). **HPLC analysis** (OX-3, 3% IPA in *n*-hexane, 0.7 ml/min, λ = 210 nm) indicated >99% *ee*: *t*<sub>(S)</sub> (minor) = 11.3 min, *t*<sub>(R)</sub> (major) = 11.8 min. **HRMS (ESI)** *m/z*: calculated for C<sub>13</sub>H<sub>14</sub>N<sub>3</sub>NaO [M+Na]<sup>+</sup>: 214.0956, found: 214.0961.

### (*S*)-3-bromo-5-(oxetan-2-yl)pyridine [(*S*)-**18b**]

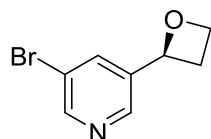

Prepared according to the general procedure: 100 mL PB buffer (50 mM, pH 6.5) containing 20 mM **18b** (2 mmol), 20 mM NaN<sub>3</sub> (2 mmol) and 10 g dcw/L *E. coli* (HheD8-M4) cells, 30 °C, reaction for 26 h. The crude product was purified by flash column chromatography on silica gel (petroleum ether : ethyl acetate = 10:1) to provide (*S*)-**18b** as a light yellow liquid in 45% yield (190.6mg). **<sup>1</sup>H NMR (400 MHz, CDCl<sub>3</sub>)** δ 8.58 (d, *J* = 2.2 Hz, 1H), 8.48 (d, *J* = 1.8 Hz, 1H), 7.95 (t, *J* = 2.0 Hz, 1H), 5.79 (t, *J* = 7.5 Hz, 1H), 4.83 (td, *J* = 8.0, 6.0 Hz, 1H), 4.65 (dt, *J* = 9.2, 5.9 Hz, 1H), 3.10 - 3.02 (m, 1H), 2.66 - 2.57 (m, 1H). **<sup>13</sup>C NMR (100 MHz, CDCl<sub>3</sub>)** δ 150.3, 145.2, 140.7, 135.7, 121.1, 79.8, 68.7, 30.5. [ $\alpha$ ]<sub>D</sub><sup>25</sup> = -99.15 (*c* = 1.00, CH<sub>2</sub>Cl<sub>2</sub>). **HPLC analysis** (OB-H, 1% IPA in *n*-hexane, 0.5 ml/min, λ = 210 nm) indicated 99% *ee*: *t*<sub>(S)</sub> (major) = 33.0 min, *t*<sub>(R)</sub> (minor) = 36.2 min. **HRMS (ESI)** *m/z*: calculated for C<sub>8</sub>H<sub>9</sub>BrNO [M+H]<sup>+</sup>: 213.9868, found: 213.9871.

### (*R*)-3-azido-1-(5-bromopyridin-3-yl)propan-1-ol [(*R*)-**18c**]

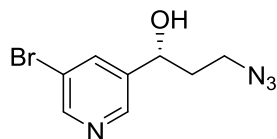

Prepared according to the general procedure: 100 mL PB buffer (50 mM, pH 6.5) containing 20 mM **18b** (2 mmol), 20 mM NaN<sub>3</sub> (2 mmol) and 10 g dcw/L *E. coli* (HheD8-M4) cells, 30 °C, reaction for 26 h. The crude product was purified by flash column chromatography on silica gel (petroleum ether : ethyl acetate = 10:1 ~ 3:1) to provide (*R*)-**18c** as a light yellow liquid in 48% yield (246.0 mg). **<sup>1</sup>H NMR (400 MHz, DMSO-*d*<sub>6</sub>)** δ 8.56 (dd, *J* = 16.0, 2.3 Hz, 2H), 8.00 (t, *J* = 2.1 Hz, 1H), 5.72 (d, *J* = 4.8 Hz, 1H), 4.72 (dt, *J* = 7.9, 5.0 Hz, 1H), 3.50 - 3.45 (m, 1H), 3.43 - 3.38 (m, 1H), 1.90 - 1.85 (m, 2H). **<sup>13</sup>C NMR (100 MHz, DMSO-*d*<sub>6</sub>)** δ 148.9, 146.2, 143.1, 136.0, 120.2, 67.0, 47.6, 37.5. [ $\alpha$ ]<sub>D</sub><sup>25</sup> = + 20.79 (*c* = 1.00, CH<sub>2</sub>Cl<sub>2</sub>). **HPLC analysis** (AD-H, 3% IPA in

*n*-hexane, 0.5 ml/min,  $\lambda$  = 210 nm) indicated 98% *ee*:  $t_{(R)}$  (major) = 69.0 min,  $t_{(S)}$  (minor) = 97.9 min. **HRMS (ESI)**  $m/z$ : calculated for  $C_8H_{10}N_4BrO$   $[M+H]^+$ : 257.0038, found: 257.0042

### (*S*)-3-(oxetan-2-yl)quinoline [(*S*)-**19b**]

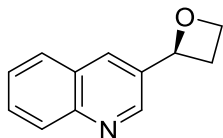

Prepared according to the general procedure: 100 mL PB buffer (50 mM, pH 6.5) containing 10 mM **19b** (1 mmol), 10 mM  $NaN_3$  (1 mmol) and 10 g dcw/L *E. coli* (HheD8-M4) cells, 30 °C, reaction for 30 h. The crude product was purified by flash column chromatography on silica gel (petroleum ether : ethyl acetate = 10:1) to provide (*S*)-**19b** as a light yellow liquid in 46% yield (81.5mg).  **$^1H$  NMR (400 MHz,  $CDCl_3$ )**  $\delta$  8.94 (d,  $J$  = 2.2 Hz, 1H), 8.21 (d,  $J$  = 2.1 Hz, 1H), 8.11 (d,  $J$  = 8.5 Hz, 1H), 7.83 (dd,  $J$  = 8.2, 1.5 Hz, 1H), 7.70 (ddd,  $J$  = 8.4, 6.8, 1.4 Hz, 1H), 7.54 (ddd,  $J$  = 8.2, 6.9, 1.3 Hz, 1H), 6.01 (t,  $J$  = 7.5 Hz, 1H), 4.90 (td,  $J$  = 7.9, 5.8 Hz, 1H), 4.74 (dt,  $J$  = 9.2, 5.9 Hz, 1H), 3.17 - 3.09 (m, 1H), 2.78 - 2.69 (m, 1H).  **$^{13}C$  NMR (100 MHz,  $CDCl_3$ )**  $\delta$  148.7, 148.0, 136.2, 132.3, 129.5, 129.4, 128.0, 127.8, 127.0, 81.0, 68.7, 30.7.  $[\alpha]_D^{25}$  = -158.32 ( $c$  = 1.00,  $CH_2Cl_2$ ). **HPLC analysis** (AD-H, 5% IPA in *n*-hexane, 0.5 ml/min,  $\lambda$  = 210 nm) indicated 95% *ee*:  $t_{(S)}$  (major) = 39.0 min,  $t_{(R)}$  (minor) = 41.6 min. **HRMS (ESI)**  $m/z$ : calculated for  $C_{12}H_{12}NO$   $[M+H]^+$ : 186.0919, found: 186.0920.

### (*R*)-3-azido-1-(quinolin-3-yl)propan-1-ol [(*R*)-**19c**]

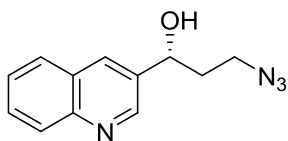

Prepared according to the general procedure: 100 mL PB buffer (50 mM, pH 6.5) containing 10 mM **19b** (1 mmol), 10 mM  $NaN_3$  (1 mmol) and 10 g dcw/L *E. coli* (HheD8-M4) cells, 30 °C, reaction for 30 h. The crude product was purified by flash column chromatography on silica gel (dichloromethane : ethyl acetate = 10:1 ~ 3:1) to provide (*R*)-**19c** as a light yellow liquid in 49% yield (107.0 mg).  **$^1H$  NMR (400 MHz,  $DMSO-d_6$ )**  $\delta$  8.95 (d,  $J$  = 2.2 Hz, 1H), 8.28 (d,  $J$  = 2.2 Hz, 1H), 8.03 (d,  $J$  = 8.4 Hz, 1H), 7.97 (dd,  $J$  = 8.2, 1.5 Hz, 1H), 7.71 (ddd,  $J$  = 8.4, 6.8, 1.5 Hz, 1H), 7.58 (ddd,  $J$  = 8.1, 6.8, 1.2 Hz, 1H), 5.80 (d,  $J$  = 4.6 Hz, 1H), 4.93 (dd,  $J$  = 11.2, 6.8 Hz, 1H), 3.58 - 3.50 (m, 1H), 3.47 - 3.41 (m, 1H), 2.00 (q,  $J$  = 6.7 Hz, 2H).  **$^{13}C$  NMR (100 MHz,  $DMSO-d_6$ )**  $\delta$  149.8, 147.1, 138.2, 132.1, 129.1, 128.7, 128.1, 127.6, 126.7, 67.8, 47.8, 37.7.  $[\alpha]_D^{25}$  = + 23.70 ( $c$  = 1.00,  $CH_2Cl_2$ ). **HPLC analysis** (OJ-H, 10% IPA in *n*-hexane, 1.0 ml/min,  $\lambda$  = 210 nm)

indicated >99% *ee*:  $t_{(R)}$  (major) = 15.7 min,  $t_{(S)}$  (minor) = 18.6 min. **HRMS (ESI)**  $m/z$ : calculated for  $C_{12}H_{12}N_4NaO$   $[M+Na]^+$ : 251.0909, found: 251.0911.

### (*S*)-2-cyclohexyloxetane [(*S*)-**21b**]

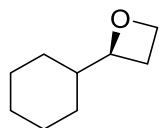

Prepared according to the general procedure: 100 mL PB buffer (50 mM, pH 6.0) containing 5 mM **21b** (0.5 mmol), 15 mM  $NaN_3$  (1.5 mmol) and 30 g dcw/L *E. coli* (HheD8-M4) cells, 30 °C, reaction for 96 h. The crude product was purified by flash column chromatography on silica gel (petroleum ether: ethyl acetate = 50 : 1) to provide (*S*)-**21b** as a light yellow liquid in 32% yield (23.1mg).  **$^1H$  NMR (400 MHz,  $CDCl_3$ )**  $\delta$  4.65 (td,  $J$  = 7.9, 5.7 Hz, 1H), 4.54 - 4.37 (m, 2H), 2.62 - 2.50 (m, 1H), 2.45 - 2.32 (m, 1H), 1.94 - 1.82 (m, 1H), 1.78 - 1.56 (m, 5H), 1.31 - 1.11 (m, 3H), 0.92 - 0.77 (m, 2H).  **$^{13}C$  NMR (100 MHz,  $CDCl_3$ )**  $\delta$  86.8, 68.3, 44.8, 27.6, 26.6, 26.2, 25.8, 25.6.  $[\alpha]_D^{25}$  = +6.00 ( $c$  = 1.00,  $CH_2Cl_2$ ). **GC analysis** ( $R_t$ -bDEXcst, 80 °C for 45 min) indicated 89% *ee*:  $t_{(S)}$  (major) = 33.0 min,  $t_{(R)}$  (minor) = 36.0 min. **HRMS (ESI)**  $m/z$ : calculated for  $C_9H_{16}NaO$   $[M+Na]^+$ : 163.1099, found: 163.1096.

### (*R*)-3-azido-1-cyclohexylpropan-1-ol [(*R*)-**21c**]

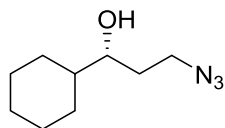

Prepared according to the general procedure: 100 mL PB buffer (50 mM, pH 6.0) containing 5 mM **21b** (0.5 mmol), 15 mM  $NaN_3$  (1.5 mmol) and 30 g dcw/L *E. coli* (HheD8-M4) cells, 30 °C, reaction for 96 h. The crude product was purified by flash column chromatography on silica gel (petroleum ether : ethyl acetate = 50:1 ~ 15:1) to provide (*R*)-**21c** as a colorless liquid in 43% yield (39.7 mg).  **$^1H$  NMR (400 MHz,  $DMSO-d_6$ )**  $\delta$  4.47 (d,  $J$  = 5.9 Hz, 1H), 3.46 - 3.39 (m, 1H), 3.37 - 3.34 (m, 1H), 3.27 - 3.21 (m, 1H), 1.78 - 1.57 (m, 6H), 1.52 - 1.48 (m, 1H), 1.26 - 1.07 (m, 4H), 1.05 - 0.87 (m, 2H).  **$^{13}C$  NMR (100 MHz,  $DMSO-d_6$ )**  $\delta$  71.1, 48.2, 43.6, 32.7, 28.7, 27.7, 26.3, 26.0, 25.9.  $[\alpha]_D^{25}$  = - 20.00 ( $c$  = 0.5,  $CH_2Cl_2$ ). **GC analysis** ( $R_t$ -bDEXcst, 140 °C for 60 min) indicated 97% *ee*:  $t_{(S)}$  (minor) = 49.3 min,  $t_{(R)}$  (major) = 50.5 min. **HRMS (ESI)**  $m/z$ : calculated for  $C_9H_{17}N_3NaO$   $[M+Na]^+$ : 206.1269, found: 206.1264.

### (S)-2-phenyloxetane [(S)-1b] (Ring opening by cyanide)

Prepared according to the general procedure: 100 mL PB buffer (50 mM, pH 7.5) containing 20 mM **1b** (2 mmol), 40 mM **mandelonitrile** (4 mmol) and 10 g dcw/L *E. coli* (HheD8-M4) cells, 30 °C, reaction for 22 h. The crude product was purified by flash column chromatography on silica gel (petroleum ether : ethyl acetate = 30:1) to provide (S)-**1b** as a light yellow liquid in 37% yield (98.1 mg). **<sup>1</sup>H NMR (400 MHz, CDCl<sub>3</sub>)** δ 7.50 - 7.45 (m, 2H), 7.42 (t, *J* = 7.7 Hz, 2H), 7.36 - 7.30 (m, 1H), 5.84 (t, *J* = 7.5 Hz, 1H), 4.85 (td, *J* = 8.1, 5.9 Hz, 1H), 4.68 (dt, *J* = 9.3, 5.8 Hz, 1H), 3.09 - 2.99 (m, 1H), 2.74 - 2.64 (m, 1H). **<sup>13</sup>C NMR (100 MHz, CDCl<sub>3</sub>)** δ 143.6, 128.6, 127.9, 125.3, 83.0, 68.3, 30.8. [ $\alpha$ ]<sub>D</sub><sup>25</sup> = -167.16 (c = 1.00, CH<sub>2</sub>Cl<sub>2</sub>). **HPLC analysis** (OX-3, 3% IPA in *n*-hexane, 0.7 ml/min,  $\lambda$  = 210 nm) indicated 97% *ee*: *t*<sub>(S)</sub> (major) = 9.8 min, *t*<sub>(R)</sub> (minor) = 11.0 min. **HRMS (ESI)** *m/z*: calculated for C<sub>9</sub>H<sub>11</sub>O [M+H]<sup>+</sup>: 135.0810, found: 135.0811.

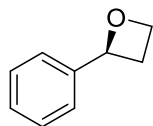

### (R)-4-hydroxy-4-phenylbutanenitrile [(R)-1d]

Prepared according to the general procedure: 100 mL PB buffer (50 mM, pH 7.5) containing 20 mM **1b** (2 mmol), 40 mM **mandelonitrile** (4 mmol) and 10 g dcw/L *E. coli* (HheD8-M4) cells, 30 °C, reaction for 22 h. The crude product was purified by flash column chromatography on silica gel (petroleum ether : ethyl acetate = 30:1 ~ 2:1) to provide (R)-**1d** as a light yellow liquid in 46% yield (147.6 mg). **<sup>1</sup>H NMR (400 MHz, CDCl<sub>3</sub>)** δ 7.38 - 7.28 (m, 5H), 4.75 (dd, *J* = 8.1, 5.3 Hz, 1H), 2.81 (s, 1H), 2.50 - 2.43 (m, 1H), 2.37 - 2.29 (m, 1H), 2.01 - 1.94 (m, 2H). **<sup>13</sup>C NMR (100 MHz, CDCl<sub>3</sub>)** δ 143.0, 128.7, 128.1, 125.7, 119.8, 72.1, 34.2, 13.7. [ $\alpha$ ]<sub>D</sub><sup>25</sup> = + 12.79 (c = 1.00, CH<sub>2</sub>Cl<sub>2</sub>). **HPLC analysis** (IH, 5% IPA in *n*-hexane, 0.5 ml/min,  $\lambda$  = 210 nm) indicated >99% *ee*: *t*<sub>(S)</sub> (minor) = 58.5 min, *t*<sub>(R)</sub> (major) = 61.6 min. **HRMS (ESI)** *m/z*: calculated for C<sub>10</sub>H<sub>11</sub>NNaO [M+Na]<sup>+</sup>: 184.0738, found: 184.0740.

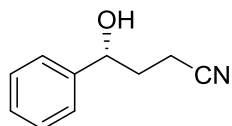

### (S)-2-phenyloxetane [(S)-1b] (Ring opening by nitrite)

Prepared according to the general procedure: 200 mL PB buffer (50 mM, pH 7.5) containing 40 mM **1b** (8 mmol), 40 mM **NaNO<sub>2</sub>** (8 mmol) and 10 g dcw/L *E. coli* (HheD8-M4) cells, 30 °C, reaction for 24 h. The crude product was purified by flash column chromatography on silica gel (petroleum ether : ethyl acetate = 30:1) to provide (S)-**1b** as a light yellow liquid in 43% yield (459.1 mg). **<sup>1</sup>H NMR (400 MHz, CDCl<sub>3</sub>)** δ 7.51 - 7.45 (m, 2H),

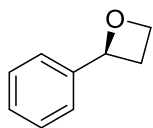

7.42 (t,  $J = 7.6$  Hz, 2H), 7.36 - 7.30 (m, 1H), 5.84 (t,  $J = 7.5$  Hz, 1H), 4.85 (td,  $J = 8.0, 5.8$  Hz, 1H), 4.68 (dt,  $J = 9.2, 5.8$  Hz, 1H), 3.09 - 2.99 (m, 1H), 2.74 - 2.63 (m, 1H).  $^{13}\text{C}$  NMR (100 MHz,  $\text{CDCl}_3$ )  $\delta$  143.6, 128.5, 127.9, 125.3, 83.0, 68.3, 30.8.  $[\alpha]_{\text{D}}^{25} = -161.94$  ( $c = 1.00$ ,  $\text{CH}_2\text{Cl}_2$ ). **HPLC analysis** (OX-3, 3% IPA in *n*-hexane, 0.7 ml/min,  $\lambda = 210$  nm) indicated >99% *ee*:  $t_{(\text{S})}$  (major) = 10.1 min,  $t_{(\text{R})}$  (minor) = 11.4 min. **HRMS (ESI)**  $m/z$ : calculated for  $\text{C}_9\text{H}_{11}\text{O}$   $[\text{M}+\text{H}]^+$ : 135.0810, found: 135.0810.

### (*R*)-3-nitro-1-phenylpropan-1-ol [(*R*)-1e]

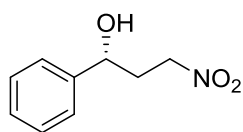

Prepared according to the general procedure: 200 mL PB buffer (50 mM, pH 7.5) containing 40 mM **1b** (8 mmol), 40 mM  $\text{NaNO}_2$  (8 mmol) and 10 g dcw/L *E. coli* (HheD8-M4) cells, 30 °C, reaction for 24 h. The crude product was purified by flash column chromatography on silica gel (petroleum ether : ethyl acetate = 30:1 ~ 2:1) to provide (*R*)-**1e** as a yellow liquid in 23% yield (327.2 mg).  $^1\text{H}$  NMR (400 MHz,  $\text{CDCl}_3$ )  $\delta$  7.38 - 7.26 (m, 5H), 4.74 (dd,  $J = 8.3, 4.6$  Hz, 1H), 4.54 - 4.48 (m, 1H), 4.41 - 4.36 (m, 1H), 3.42 (s, 1H), 2.37 - 2.27 (m, 2H).  $^{13}\text{C}$  NMR (100 MHz,  $\text{CDCl}_3$ )  $\delta$  142.9, 128.9, 128.3, 125.6, 72.4, 71.1, 35.9.  $[\alpha]_{\text{D}}^{25} = +50.78$  ( $c = 1.00$ ,  $\text{CH}_2\text{Cl}_2$ ). **HPLC analysis** (OD-H, 10% IPA in *n*-hexane, 0.5 ml/min,  $\lambda = 210$  nm) indicated >99% *ee*:  $t_{(\text{S})}$  (minor) = 29.0 min,  $t_{(\text{R})}$  (major) = 39.8 min. **HRMS (ESI)**  $m/z$ : calculated for  $\text{C}_9\text{H}_{11}\text{NNaO}_3$   $[\text{M}+\text{Na}]^+$ : 204.0637, found: 204.0642.

### (*R*)-1-phenylpropane-1,3-diol [(*R*)-1f]

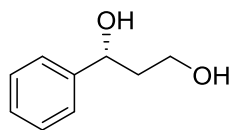

Prepared according to the general procedure: 200 mL PB buffer (50 mM, pH 7.5) containing 40 mM **1b** (8 mmol), 40 mM  $\text{NaNO}_2$  (8 mmol) and 10 g dcw/L *E. coli* (HheD8-M4) cells, 30 °C, reaction for 24 h. The crude product was purified by flash column chromatography on silica gel (petroleum ether : ethyl acetate = 30:1 ~ 0:1) to provide (*R*)-**1f** as a light yellow liquid in 19% yield (232.1 mg).  $^1\text{H}$  NMR (400 MHz,  $\text{CDCl}_3$ )  $\delta$  7.37 - 7.23 (m, 5H), 4.85 (dd,  $J = 8.7, 3.9$  Hz, 1H), 3.70 - 3.77 (m, 2H), 3.64 (s, 2H), 1.93 - 1.83 (m, 2H).  $^{13}\text{C}$  NMR (100 MHz,  $\text{CDCl}_3$ )  $\delta$  144.4, 128.5, 127.5, 125.7, 73.6, 60.9, 40.4.  $[\alpha]_{\text{D}}^{25} = +43.09$  ( $c = 1.00$ ,  $\text{CH}_2\text{Cl}_2$ ). **HPLC analysis** (IH, 12% IPA in *n*-hexane, 0.8 ml/min,  $\lambda = 210$  nm) indicated 88% *ee*:  $t_{(\text{S})}$  (minor) = 11.9 min,  $t_{(\text{R})}$  (major) = 13.4 min. **HRMS (ESI)**  $m/z$ : calculated for  $\text{C}_9\text{H}_{12}\text{NaO}_2$   $[\text{M}+\text{Na}]^+$ : 175.0735, found: 175.0732.

## 7. Large-scale reactions

### Large-scale reaction for the enantioselective dehalogenation of (*rac*)-**1a**:

In a 250 mL round-bottom flask, a resting cell suspension of *E. coli* (HheD8-M4) at a concentration of 10 g dcw/L was prepared in 100 mL of PB buffer (200 mM, pH 8.5). To the suspension, 20 mL of *n*-hexane was added, followed by 3.412 g (20 mmol) of  $\gamma$ -haloalcohol (*rac*)-**1a** dissolved in 2 mL of DMSO to achieve a final concentration of 200 mM. The reaction mixture was then stirred at 30 °C, and the pH was adjusted at  $8.5 \pm 0.1$  using a pH stat and 5 M NaOH as the alkaline solution. Upon completion of the enzymatic reaction after 33 h, the reaction mixture was subjected to extraction with ethyl acetate ( $3 \times 90$  mL). The organic phases were separated by centrifugation ( $8800 \times g$ , 3 min), combined, dried over anhydrous  $\text{Na}_2\text{SO}_4$ , and evaporated at reduced pressure. The resulting mixture was purified by flash chromatography (petroleum ether : ethyl acetate = 50:1 ~ 20:1) on silica gel to afford the desired chiral oxetane (*R*)-**1b** with 1.183 g (44% yield, >99% e.e.) and chiral  $\gamma$ -haloalcohol (*S*)-**1a** with 1.700 g (49% yield, 97% e.e.).

### Large-scale reaction for the enantioselective ring-opening of (*rac*)-**1b**:

In a 250 mL round-bottom flask, a resting cell suspension of *E. coli* (HheD8-M4) at a concentration of 10 g dcw/L was prepared in 100 mL of PB buffer (300 mM, pH 7.0). To the suspension, 20 mL of *n*-hexane was added, followed by 2.683 g (20 mmol) of oxetane (*rac*)-**1b** dissolved in 2 mL of DMSO and 1.302 g (20 mmol) of  $\text{NaN}_3$ . The reaction mixture was then stirred at 30 °C for 39 h. Upon completion of the enzymatic reaction, the reaction mixture was subjected to extraction with ethyl acetate ( $3 \times 90$  mL). The organic phases were separated by centrifugation ( $8800 \times g$ , 3 min), combined, dried over anhydrous  $\text{Na}_2\text{SO}_4$ , and evaporated at reduced pressure. The resulting mixture was purified by flash chromatography (petroleum ether: ethyl acetate = 50:1 ~ 15:1) on silica gel to afford the desired chiral  $\gamma$ -azidoalcohol (*R*)-**1c** with 1.597 g (45% yield, >99% e.e.) and chiral oxetane (*S*)-**1b** with 1.046 g (39% yield, 97% e.e.).

## 8. Biocatalytic cascades

General procedure: In a 200 mL round-bottom flask, a resting cell suspension of *E. coli* (HheD8-M4) at a concentration of 10 g dcw/L was prepared in 100 mL of PB buffer (50 mM, pH 7.5). To this suspension, 2 mmol of oxetane (*rac*)-**a** and 2 mmol of  $\text{NaN}_3$  were added to a final concentration of 20 mM. The reaction mixture was then stirred at 30 °C. Upon completion of the

enzymatic reaction, the mixture was subjected to extraction using ethyl acetate ( $3 \times 70$  mL). The organic phases were separated by centrifugation ( $8800 \times g$ , 3 min), combined, dried over anhydrous  $\text{Na}_2\text{SO}_4$ , and evaporated at reduced pressure. The resulting mixture was purified by flash chromatography (*n*-hexane: dichloromethane: ethyl acetate = 6:2:1) on silica gel to afford the desired chiral  $\gamma$ -azidoalcohol (*R*)-**c** and  $\gamma$ -haloalcohol (*S*)-**a**.

| Substrate                 | T (h) | Isolated products                                           |                                                             |
|---------------------------|-------|-------------------------------------------------------------|-------------------------------------------------------------|
| ( <i>rac</i> )- <b>1a</b> | 8     | ( <i>R</i> )- <b>1c</b> (167.4 mg)<br>(47% yield, >99 e.e.) | ( <i>S</i> )- <b>1a</b> (171.0 mg)<br>(50% yield, >99 e.e.) |
| ( <i>rac</i> )- <b>6a</b> | 12    | ( <i>R</i> )- <b>6c</b> (184.3 mg)<br>(47% yield, >99 e.e.) | ( <i>S</i> )- <b>6a</b> (187.2 mg)<br>(49% yield, >99 e.e.) |
| ( <i>rac</i> )- <b>7a</b> | 48    | ( <i>R</i> )- <b>7c</b> (200.3 mg)<br>(47% yield, >99 e.e.) | ( <i>S</i> )- <b>7a</b> (204.1 mg)<br>(50% yield, >99 e.e.) |

## 9. Transformations of chiral products

### Synthesis of (*R*)-**1aa** from (*S*)-**1a**:

To a 50-mL round-bottom flask cooled with an ice bath, 264.2 mg (2.0 mmol) of tert-butyl *N*-hydroxycarbarnate was added, followed by the addition of 5 mL of anhydrous *N,N*-dimethylformamide (DMF). Then, 88.0 mg (2.2 mmol) of NaH was added, and the mixture was stirred for 30 min. Subsequently, 0.5 mL of anhydrous DMF containing 170.6 mg (1.0 mmol) of (*S*)-**1a** was added dropwise to the reaction mixture. The temperature was then gradually raised to 25 °C and the reaction was allowed to proceed for 72 h. Upon completion, the reaction mixture was quenched with saturated  $\text{NH}_4\text{Cl}$  solution and extracted thrice with ethyl acetate  $3 \times 5$  mL. The organic layers were then separated, combined, and washed thrice with saturated brine. The organic phase was then dried over anhydrous  $\text{Na}_2\text{SO}_4$ , concentrated under vacuum, and purified by flash chromatography (petroleum ether: ethyl acetate = 15:1) to give the intermediate. Next, the intermediate was dissolved in 20 mL of dichloromethane (DCM) while cooling in an ice bath. Then, 208.5  $\mu\text{L}$  (1.5 mmol) of triethylamine ( $\text{Et}_3\text{N}$ ) was added, and the mixture was stirred for 10 min. Subsequently, 68  $\mu\text{L}$  (0.87 mmol) of methanesulfonyl chloride was added dropwise, and the reaction was continued for 2 h. Following the reaction, the mixture was diluted with 10 mL of DCM and washed three times with saturated brine. The organic phases were then separated and concentrated under reduced pressure to yield a crude intermediate product. Finally, the crude

intermediate was dissolved in 20 mL of DCM at room temperature (25 °C). To this, 2.2 mL of trifluoroacetic acid (TFA) was added, and the mixture was stirred for 1 h. The reaction mixture was concentrated under reduced pressure, and the residue was redissolved in 10 mL of DCM. The solution was then washed three times with saturated NaHCO<sub>3</sub> aqueous solution, dried over anhydrous Na<sub>2</sub>SO<sub>4</sub>, and then concentrated again under reduced pressure. The resulting mixture was purified by flash chromatography (petroleum ether: ethyl acetate = 15:1) on silica gel to afford the desired chiral product (*R*)-**1aa** as a light yellow solid. The (*rac*)-**1aa** was synthesized from (*rac*)-**1a** according to the same procedures and used as a standard for chiral HPLC analysis.

### (*R*)-3-phenylisoxazolidine [(*R*)-**1aa**]

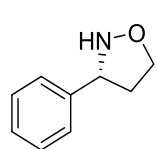

Light yellow solid in 64% yield (96.4 mg). <sup>1</sup>H NMR (400 MHz, CDCl<sub>3</sub>) δ 7.39 - 7.32 (m, 4H), 7.30 - 7.25 (m, 1H), 5.32 (s, 1H), 4.50 - 4.45 (m, 1H), 4.10 - 3.99 (m, 2H), 2.72 - 2.62 (m, 1H), 2.34 - 2.24 (m, 1H). <sup>13</sup>C NMR (100 MHz, CDCl<sub>3</sub>) δ 140.0, 128.8, 127.7, 127.0, 70.8, 63.5, 37.8. [α]<sub>D</sub><sup>25</sup> = - 12.59 (c = 1.00, CH<sub>2</sub>Cl<sub>2</sub>). HPLC analysis (OJ-H, 10% IPA in *n*-hexane, 1.0 ml/min, 210 nm) indicated 92% *ee*: *t*<sub>(S)</sub> (minor) = 15.0 min, *t*<sub>(R)</sub> (major) = 17.5 min. HRMS (ESI) *m/z*: calculated for C<sub>9</sub>H<sub>12</sub>NO [M+H]<sup>+</sup>: 159.0919, found: 159.0917. **m.p.**: 31.3 - 32.7 °C.

### (*rac*)-3-phenylisoxazolidine [(*rac*)-**1aa**]

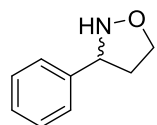

<sup>1</sup>H NMR (400 MHz, CDCl<sub>3</sub>) δ 7.40 - 7.33 (m, 4H), 7.30 - 7.26 (m, 1H), 5.10 (s, 1H), 4.47 (t, *J* = 6.3 Hz, 1H), 4.08 - 4.00 (m, 2H), 2.71 - 2.62 (m, 1H), 2.33 - 2.24 (m, 1H). <sup>13</sup>C NMR (100 MHz, CDCl<sub>3</sub>) δ 140.1, 128.7, 127.8, 126.9, 70.8, 63.5, 37.7.

### Synthesis of (*S*)-**1ab** from (*S*)-**1a**:

To a 10-mL round-bottom flask, 82.9 mg (0.60 mmol) of anhydrous K<sub>2</sub>CO<sub>3</sub> was added, followed by the addition of 1 mL of anhydrous DMF and 72.3 mg (0.5 mmol) of 1-naphthol. Afterward, the reaction temperature was increased to 70 °C, followed by the dropwise addition of 85.3 mg (0.5 mmol) of (*S*)-**1a**. The reaction was stirred for 12 hours, and subsequently quenched by adding 1 mL of distilled water. Equal volume of ethyl acetate was used to extract the mixture three times. The organic layers were then separated, combined, and washed thrice with saturated brine. The organic phase was then dried over anhydrous Na<sub>2</sub>SO<sub>4</sub>, and concentrated under reduced pressure to



yield the crude product. The resulting mixture was purified by flash chromatography (petroleum ether: ethyl acetate = 15:1) on silica gel to afford the desired chiral product (*S*)-**1ab** as a light pink solid. The (*rac*)-**1ab** was synthesized from (*rac*)-**1a** according to the same procedures and used as a standard for chiral HPLC analysis.

**(*S*)-3-(naphthalen-1-yloxy)-1-phenylpropan-1-ol [(*S*)-**1ab**]**

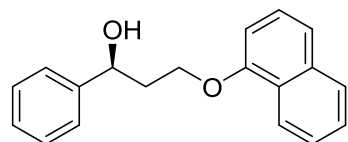

Light pink solid in 78% yield (108.9 mg). **<sup>1</sup>H NMR (400 MHz, CDCl<sub>3</sub>)** δ 8.28 - 8.25 (m, 1H), 7.84 - 7.81 (m, 1H), 7.54 - 7.48 (m, 2H), 7.46 - 7.43 (m, 3H), 7.40 - 7.35 (m, 3H), 7.34 - 7.29 (m, 1H), 6.81 (d, *J* = 7.6 Hz, 1H), 5.15 (q, *J* = 4.9 Hz, 1H), 4.38 - 4.32 (m, 1H), 4.23 - 4.18 (m, 1H), 2.47 - 2.40 (m, 1H), 2.37 - 2.30 (m, 2H). **<sup>13</sup>C NMR (100 MHz, CDCl<sub>3</sub>)** δ 154.5, 144.3, 134.6, 128.7, 127.8, 127.7, 126.5, 126.0, 126.0, 125.6, 125.4, 121.9, 120.5, 104.8, 72.3, 65.4, 38.6. [ $\alpha$ ]<sub>D</sub><sup>25</sup> = +25.58 (*c* = 1.00, CH<sub>2</sub>Cl<sub>2</sub>). **HPLC analysis** (OX-3, 3% IPA in *n*-hexane, 0.7 ml/min, 210 nm) indicated 97% *ee*: *t*<sub>(*S*)</sub> (major) = 21.4 min, *t*<sub>(*R*)</sub> (minor) = 23.7 min. **HRMS (ESI) *m/z***: calculated for C<sub>19</sub>H<sub>18</sub>NaO<sub>2</sub> [*M*+Na]<sup>+</sup>: 301.1204, found: 301.1211. **m.p.**: 69.4 - 71.3 °C.

**(*rac*)-3-(naphthalen-1-yloxy)-1-phenylpropan-1-ol [(*rac*)-**1ab**]**

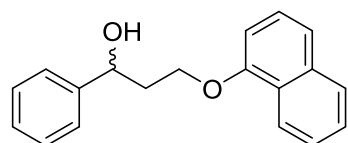

**<sup>1</sup>H NMR (400 MHz, CDCl<sub>3</sub>)** δ 8.34 - 8.32 (m, 1H), 7.88 - 7.86 (m, 1H), 7.59 - 7.53 (m, 2H), 7.50 (d, *J* = 8.2 Hz, 1H), 7.47 - 7.39 (m, 5H), 7.37 - 7.33 (m, 1H), 6.82 (d, *J* = 7.6 Hz, 1H), 5.13 (dd, *J* = 8.2, 5.0 Hz, 1H), 4.36 - 4.31 (m, 1H), 4.20 - 4.15 (m, 1H), 2.66 (s, 1H), 2.46 - 2.29 (m, 2H). **<sup>13</sup>C NMR (100 MHz, CDCl<sub>3</sub>)** δ 154.5, 144.2, 134.5, 128.6, 127.7, 127.6, 126.5, 126.0, 125.9, 125.6, 125.3, 121.9, 120.4, 104.8, 72.0, 65.3, 38.5.

**Synthesis of (*R*)-**1ba** from (*R*)-**1b**:**

To a wellstirred suspension of 200.0 mg (5.0 mmol) of NaH in dry diglyme (1 mL) was added 660.0 mg (3.0 mmol) of trimethylsulfoxonium iodide at room temperature. The mixture was gently heated to 125 °C, and 67.2 mg (0.5 mmol) of chiral oxetane (*R*)-**1b** in diglyme (0.5 mL) was added dropwise to the reaction mixture. The reaction mixture was stirred at 125 °C for 0.5 h, cooled, carefully quenched with distilled water, and extracted four times with equal volume of *n*-hexane. The combined extracts were washed with saturated brine, dried over anhydrous Na<sub>2</sub>SO<sub>4</sub> and

concentrated under reduced pressure to yield the crude product. The resulting mixture was purified by flash chromatography (petroleum ether: ethyl acetate = 50:1) on silica gel to afford the desired chiral product (*R*)-**1ba** as a light yellow liquid. The (*rac*)-**1ba** was synthesized from (*rac*)-**1b** according to the same procedures and used as a standard for chiral HPLC analysis.

**(*R*)-2-phenyltetrahydrofuran [(*R*)-**1ba**]**

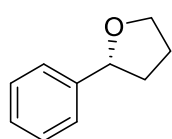

Light yellow liquid in 73% yield (54.4 mg). <sup>1</sup>H NMR (400 MHz, CDCl<sub>3</sub>) δ 7.37 - 7.34 (m, 4H), 7.31 - 7.27 (m, 1H), 4.93 (t, *J* = 7.2 Hz, 1H), 4.13 (dt, *J* = 8.3, 6.9 Hz, 1H), 3.97 (td, *J* = 7.8, 6.4 Hz, 1H), 2.40 - 2.32 (m, 1H), 2.08 - 2.00 (m, 2H), 1.88 - 1.79 (m, 1H). <sup>13</sup>C NMR (100 MHz, CDCl<sub>3</sub>) δ 143.5, 128.4, 127.2, 125.7, 80.8, 68.8, 34.7, 26.1. [ $\alpha$ ]<sub>D</sub><sup>25</sup> = +34.27 (*c* = 1.00, CH<sub>2</sub>Cl<sub>2</sub>). **HPLC analysis** (OD-H, 8% IPA in *n*-hexane, 0.8 ml/min, 210 nm) indicated 92% *ee*: *t*<sub>(*R*)</sub> (major) = 6.2 min, *t*<sub>(*S*)</sub> (minor) = 8.0 min. **HRMS (ESI)** *m/z*: calculated for C<sub>10</sub>H<sub>13</sub>O [M+H]<sup>+</sup>: 149.0966, found: 149.0960.

**(*rac*)-2-phenyltetrahydrofuran [(*rac*)-**1ba**]**

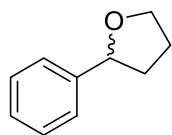

<sup>1</sup>H NMR (400 MHz, CDCl<sub>3</sub>) δ 7.35 (d, *J* = 4.3 Hz, 4H), 7.30 - 7.24 (m, 1H), 4.91 (t, *J* = 7.2 Hz, 1H), 4.12 (q, *J* = 7.4 Hz, 1H), 3.96 (q, *J* = 7.3 Hz, 1H), 2.38 - 2.30 (m, 1H), 2.08 - 1.97 (m, 2H), 1.86 - 1.77 (m, 1H). <sup>13</sup>C NMR (100 MHz, CDCl<sub>3</sub>) δ 143.5, 128.4, 127.2, 125.7, 80.8, 68.8, 34.7, 26.1.

**Synthesis of (*R*)-**1bb** from (*R*)-**1b**:**

To a 10 mL round-bottom flask under argon, a solution of 149.5 mg (0.45 mmol) tris(2-methylphenyl)borate (CAS: 2665-12-5) in 1.0 mL of tetrahydrofuran (THF) was added, followed by the addition of 40.3 mg (0.3 mmol) oxetane (*R*)-**1b** in 0.5 mL of THF. The reaction mixture was stirred at 50 °C for 1 h. After evaporation of the solvent, the resulting mixture was then purified by flash chromatography (petroleum ether: ethyl acetate: DCM= 15:1:1) on silica gel, to give the desired chiral product (*R*)-**1bb** as a white solid. The (*rac*)-**1bb** was synthesized from (*rac*)-**1b** according to the same procedures and used as a standard for chiral HPLC analysis.

**(*R*)-3-phenyl-3-(*o*-tolylloxy)propan-1-ol [(*R*)-1bb]**

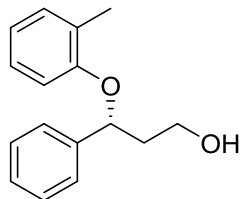

White solid in 54% yield (38.0 mg). **<sup>1</sup>H NMR (400 MHz, CDCl<sub>3</sub>)**  $\delta$  7.37 - 7.31 (m, 4H), 7.27 - 7.23 (m, 1H), 7.13 (d,  $J$  = 7.3 Hz, 1H), 6.97 (t,  $J$  = 7.8 Hz, 0H), 6.79 (t,  $J$  = 7.4 Hz, 1H), 6.63 (d,  $J$  = 8.2 Hz, 0H), 5.40 (dd,  $J$  = 8.6, 4.2 Hz, 1H), 3.93 - 3.87 (m, 1H), 3.84 - 3.78 (m, 1H), 2.33 (s, 3H), 2.30 - 2.22 (m, 1H), 2.16 - 2.08 (m, 1H). **<sup>13</sup>C NMR (100 MHz, CDCl<sub>3</sub>)**  $\delta$  155.8, 141.7, 130.8, 128.8, 127.7, 126.9, 126.8, 125.8, 120.6, 112.9, 77.8, 60.0, 41.4, 16.8.  **$[\alpha]_D^{25}$**  = - 19.19 (c = 1.00, CH<sub>2</sub>Cl<sub>2</sub>). **HPLC analysis** (AD-H, 5% IPA in *n*-hexane, 1.0 ml/min, 210 nm) indicated 83% *ee*:  $t_{(R)}$  (major) = 9.0 min,  $t_{(S)}$  (minor) = 13.5 min. **HRMS (ESI)  $m/z$** : calculated for C<sub>16</sub>H<sub>18</sub>NaO<sub>2</sub>  $[M+Na]^+$ : 265.1204, found: 265.1210. **m.p.**: 49.7 - 51.4 °C.

**(*rac*)-3-phenyl-3-(*o*-tolylloxy)propan-1-ol [(*rac*)-1bb]**

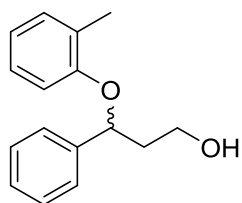

**<sup>1</sup>H NMR (400 MHz, CDCl<sub>3</sub>)**  $\delta$  7.38 - 7.32 (m, 4H), 7.29 - 7.24 (m, 1H), 7.14 (d,  $J$  = 7.3 Hz, 1H), 6.98 (t,  $J$  = 8.7 Hz, 1H), 6.81 (t,  $J$  = 7.3 Hz, 1H), 6.65 (d,  $J$  = 8.2 Hz, 1H), 5.42 (dd,  $J$  = 8.6, 4.2 Hz, 1H), 3.93 - 3.88 (m, 1H), 3.84 - 3.79 (m, 1H), 2.35 (s, 3H), 2.31 - 2.23 (m, 1H), 2.18 - 2.09 (m, 1H). **<sup>13</sup>C NMR (100 MHz, CDCl<sub>3</sub>)**  $\delta$  155.8, 141.7, 130.8, 128.8, 127.7, 126.9, 126.7, 125.8, 120.6, 112.9, 77.7, 60.0, 41.4, 16.8.

**Synthesis of (*R*)-1ca from (*R*)-1c:**

To 50-mL round-bottom flask was added 181.1 mg (1.02 mmol) of  $\gamma$ -azidoalcohol (*R*)-1c and 225  $\mu$ L (2.04 mmol) of ethynylbenzene. CuSO<sub>4</sub>·5H<sub>2</sub>O (3.7 mg, 0.01 mmol) was weighed into a 10-mL round-bottom flask along with sodium ascorbate (11.4 mg, 0.06 mmol) and dissolved in 5.0 mL distilled H<sub>2</sub>O. To this solution was added MonoPhos (3.8 mg, 0.01 mmol) and the solution was stirred at room temperature for 15 min. The solution in the 10-mL round-bottom flask was added to the roundbottom flask (with stirring) and a further 10.0 mL of water was added to the mixture. The reaction mixture was stirred at room temperature overnight (approximately 14 h). Afterwards, 10.0 mL of ice-cold distilled water was added to the mixture, followed by extraction with equal volume of DCM for three times. The combined extracts were washed with saturated brine, dried over anhydrous Na<sub>2</sub>SO<sub>4</sub> and concentrated under reduced pressure to yield the crude product. The resulting mixture was purified by flash chromatography (petroleum ether: ethyl

acetate= 2:1) on silica gel to afford the desired chiral product (*R*)-**1ca** as a white solid. The (*rac*)-**1ca** was synthesized from (*rac*)-**1c** according to the same procedures and used as a standard for chiral HPLC analysis.

**(*R*)-1-phenyl-3-(4-phenyl-1H-1,2,3-triazol-1-yl)propan-1-ol [(*R*)-**1ca**]**

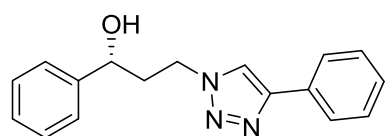

White solid in 89% yield (255.1 mg). <sup>1</sup>H NMR (400 MHz, CDCl<sub>3</sub>) δ 7.76 - 7.74 (m, 3H), 7.39 - 7.23 (m, 8H), 4.66 (dd, *J* = 7.7, 5.7 Hz, 1H), 4.60 - 4.53 (m, 1H), 4.49 - 4.43 (m, 1H), 3.37 (s, 1H), 2.30 (dt, *J* = 7.7, 6.3 Hz, 2H). <sup>13</sup>C NMR (100 MHz, CDCl<sub>3</sub>) δ 147.7, 143.6, 130.5, 128.9, 128.7, 128.3, 127.9, 125.8, 125.7, 120.4, 70.8, 47.3, 39.2. [ $\alpha$ ]<sub>D</sub><sup>25</sup> = + 7.10 (*c* = 1.00, CH<sub>2</sub>Cl<sub>2</sub>). HPLC analysis (OD-H, 20% IPA in *n*-hexane, 0.5 ml/min,  $\lambda$  = 210 nm) indicated >99% *ee*: *t*<sub>(S)</sub> (minor) = 26.4 min, *t*<sub>(R)</sub> (major) = 37.9 min. HRMS (ESI) *m/z*: calculated for C<sub>17</sub>H<sub>18</sub>N<sub>3</sub>O [M+H]<sup>+</sup>: 280.1450, found: 280.1456. m.p.: 117.2 ~ 120.0 °C.

**(*rac*)-1-phenyl-3-(4-phenyl-1H-1,2,3-triazol-1-yl)propan-1-ol [(*rac*)-**1ca**]**

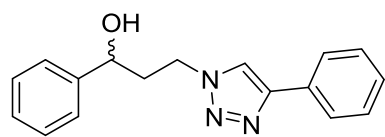

<sup>1</sup>H NMR (400 MHz, CDCl<sub>3</sub>) δ 7.76 - 7.74 (m, 3H), 7.39 - 7.24 (m, 8H), 4.67 (dd, *J* = 7.6, 5.6 Hz, 1H), 4.59 - 4.52 (m, 1H), 4.47 - 4.41 (m, 1H), 3.90 (s, 1H), 2.29 (q, *J* = 6.8 Hz, 2H). <sup>13</sup>C NMR (100 MHz, CDCl<sub>3</sub>) δ 147.6, 143.7, 130.4, 128.9, 128.6, 128.2, 127.8, 125.7, 125.7, 120.4, 70.6, 47.2, 39.2.

**Synthesis of (*R*)-**1cb** from (*R*)-**1c**:**

To a 50-mL round-bottom flask, 104.2 mg (0.83 mmol) of 4,4-dimethylcyclohexan-1-one and 8 mL of anhydrous DCM were added. The flask was cooled to -78 °C, followed by the addition of 2 mL (16.21 mmol) of BF<sub>3</sub>·OEt<sub>2</sub>, and then stirred for 30 minutes. Subsequently, a solution of 186.6 mg (1.05 mmol)  $\gamma$ -azidoalcohol (*R*)-**1c** in 2.0 mL of anhydrous DCM was cooled to 0 °C and then added dropwise to the above round-bottom flask. The reaction temperature was then slowly increased to room temperature and allowed to proceed for 24 h. The reaction mixture was concentrated under vacuum to yield a viscous brown liquid. Next, 10 mL of 15% (w/v) aqueous KOH solution was added to the crude product, and the mixture was stirred for 1 h. Equal volume of DCM was used to extract the mixture three times. The organic layers were separated, combined,

and washed with distilled water followed by saturated brine. The organic phase was dried over anhydrous Na<sub>2</sub>SO<sub>4</sub> and concentrated under reduced pressure. The resultant mixture was further purified by flash chromatography (DCM: ethyl acetate = 2:1) on silica gel to afford the desired chiral product **(R)-1cb** as an orange liquid. The **(rac)-1cb** was synthesized from **(rac)-1c** according to the same procedures and used as a standard for chiral HPLC analysis.

**(R)-1-(3-hydroxy-3-phenylpropyl)-5,5-dimethylazepan-2-one [(R)-1cb]**

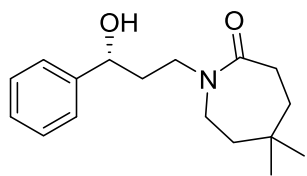

Yellow oil in 88% yield (256.3 mg). <sup>1</sup>H NMR (400 MHz, CDCl<sub>3</sub>) δ 7.35 - 7.29 (m, 4H), 7.23 (q, *J* = 6.3 Hz, 1H), 4.81 (d, *J* = 3.9 Hz, 1H), 4.54 (dt, *J* = 10.5, 3.4 Hz, 1H), 4.09 (ddd, *J* = 15.0, 11.3, 4.3 Hz, 1H), 3.28 (s, 2H), 3.05 (dt, *J* = 14.2, 4.5 Hz, 1H), 2.54 - 2.40 (m, 2H), 1.93 - 1.84 (m, 1H), 1.80 - 1.71 (m, 1H), 1.52 - 1.36 (m, 4H), 0.96 (d, *J* = 7.6 Hz, 6H). <sup>13</sup>C NMR (100 MHz, CDCl<sub>3</sub>) δ 177.3, 144.2, 128.3, 127.1, 125.7, 69.8, 45.4, 45.3, 41.0, 37.6, 36.2, 32.5, 32.3. [ $\alpha$ ]<sub>D</sub><sup>25</sup> = -2.00 (*c* = 1.00, CH<sub>2</sub>Cl<sub>2</sub>). **HPLC analysis** (OJ-H, 10% IPA in *n*-hexane, 1.0 ml/min,  $\lambda$  = 214 nm) indicated >99% *ee*: *t*<sub>(S)</sub> (minor) = 8.1 min, *t*<sub>(R)</sub> (major) = 8.9 min. **HRMS (ESI)** *m/z*: calculated for C<sub>17</sub>H<sub>25</sub>NNaO<sub>2</sub> [M+Na]<sup>+</sup>: 298.1783, found: 298.1789. **m.p.**: 65.3 - 71.2 °C.

**(rac)-1-(3-hydroxy-3-phenylpropyl)-5,5-dimethylazepan-2-one [(rac)-1cb]**

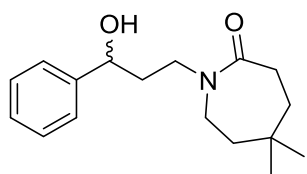

<sup>1</sup>H NMR (400 MHz, CDCl<sub>3</sub>) δ 7.35 - 7.28 (m, 4H), 7.23 - 7.19 (m, 1H), 4.87 (dt, *J* = 3.9 Hz, 1H), 4.53 (dt, *J* = 10.2, 3.4 Hz, 1H), 4.05 (ddd, *J* = 14.5, 10.8, 4.6 Hz, 1H), 3.27 (s, 2H), 3.05 (dt, *J* = 14.7, 4.0 Hz, 1H), 2.51 - 2.38 (m, 2H), 1.92 - 1.84 (m, 1H), 1.79 - 1.71 (m, 1H), 1.48 - 1.39 (m, 4H), 0.95 (d, *J* = 7.2 Hz, 6H). <sup>13</sup>C NMR (100 MHz, CDCl<sub>3</sub>) δ 177.2, 144.1, 128.2, 127.0, 125.6, 69.7, 45.3, 45.2, 40.9, 37.6, 36.1, 32.4, 32.2.

**Synthesis of (R)-1da from (R)-1d:**

To a 10-mL round-bottom flask, 52.6 mg (0.33 mmol)  $\gamma$ -cyanoalcohol **(R)-1d** and 1.1 mL of 3 M aqueous NaOH solution were added. After the addition of 1.0 mL of 30% (w/v) H<sub>2</sub>O<sub>2</sub>, the solution was heated to 70 °C and allowed to proceed for 2 h. After cooling the flask to room temperature, 10.0 mL of distilled water was added to quench the reaction. The reaction mixture was extracted 20 mL of DCM. The aqueous phase was separated, followed by the addition of 6 M HCl solution

until the pH reached between 2-3. Then the reaction mixture was extracted with DCM ( $3 \times 10$  mL). The combined organic layers were dried over anhydrous  $\text{Na}_2\text{SO}_4$  and concentrated under reduced pressure to yield the crude product. The resulting mixture was purified by flash chromatography (petroleum ether: ethyl acetate = 2:1) on silica gel to afford the desired chiral product (*R*)-**1da** as a colorless liquid. The (*rac*)-**1da** was obtained from commercial suppliers and used as a standard for chiral HPLC analysis.

#### (*R*)-5-phenyldihydrofuran-2(3H)-one [(*R*)-**1da**]

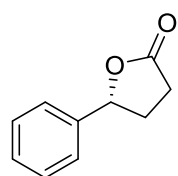

Colorless oil in 73% yield (38.8 mg).  $^1\text{H}$  NMR (400 MHz,  $\text{CDCl}_3$ )  $\delta$  7.41 - 7.32 (m, 5H), 5.50 (dd,  $J = 8.1, 5.8$  Hz, 1H), 2.69 - 2.62 (m, 3H), 2.22 - 2.15 (m, 1H).  $^{13}\text{C}$  NMR (100 MHz,  $\text{CDCl}_3$ )  $\delta$  177.1, 139.4, 128.8, 128.5, 125.4, 81.3, 31.1, 29.1.  $[\alpha]_{\text{D}}^{25} = +17.19$  ( $c = 1.00$ ,  $\text{CH}_2\text{Cl}_2$ ). **HPLC analysis** (IH, 10% IPA in *n*-hexane, 1.0 ml/min,  $\lambda = 210$  nm) indicated >99% *ee*:  $t_{(S)}$  (minor) = 24.5 min,  $t_{(R)}$  (major) = 28.3 min. **HRMS (ESI)**  $m/z$ : calculated for  $\text{C}_{10}\text{H}_{10}\text{NaO}_2$   $[\text{M}+\text{Na}]^+$ : 185.0578, found: 185.0581.

#### Synthesis of (*R*)-**1db** from (*R*)-**1d**:

To a 10-mL round-bottom flask, 71.8 mg (0.45 mmol) of  $\gamma$ -cyanoalcohol (*R*)-**1d**, 150  $\mu\text{L}$  of 30% (w/v)  $\text{H}_2\text{O}_2$  and 2.0 mL of 25% (w/v)  $\text{NH}_3 \cdot \text{H}_2\text{O}$  were added. The reaction mixture was allowed to stir at room temperature for 12 h. Afterwards, 15 mL methanol was added to the reaction and dried over anhydrous  $\text{Na}_2\text{SO}_4$ . Then the mixture were filtered and concentrated under reduced pressure to yield the crude product. The resulting mixture was purified by flash chromatography (methanol: ethyl acetate = 1:10) on silica gel to afford the desired chiral product (*R*)-**1db** as a colorless liquid. The (*rac*)-**1db** was synthesized from (*rac*)-**1d** according to the same procedures and used as a standard for chiral HPLC analysis.

#### (*R*)-4-hydroxy-4-phenylbutanamide [(*R*)-**1db**]

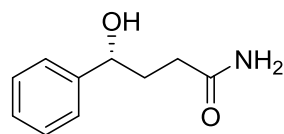

Colorless liquid in 54% yield (42.9 mg).  $^1\text{H}$  NMR (400 MHz,  $\text{CD}_3\text{OD}$ )  $\delta$  7.37 - 7.30 (m, 4H), 7.26 - 7.22 (m, 1H), 4.91 (s, 3H), 4.65 (t,  $J = 6.6$  Hz, 1H), 2.30 - 2.22 (m, 2H), 2.03 - 1.96 (m, 2H).  $^{13}\text{C}$  NMR (100 MHz,  $\text{CD}_3\text{OD}$ )  $\delta$  178.8, 145.9, 129.3, 128.3, 127.0, 74.3, 35.9, 32.8.  $[\alpha]_{\text{D}}^{25} = +34.69$  ( $c = 1.00$ ,  $\text{CH}_2\text{Cl}_2$ ). **HPLC analysis** (OJ-H, 10% IPA in *n*-hexane, 1.0 ml/min,  $\lambda = 210$  nm)

indicated >99% *ee*:  $t_{(R)}$  (major) = 15.8 min,  $t_{(S)}$  (minor) = 18.1 min. **HRMS (ESI)**  $m/z$ : calculated for  $C_{10}H_{13}NNaO_2$   $[M+Na]^+$ : 202.0844, found: 202.0850.

**(rac)-4-hydroxy-4-phenylbutanamide [(rac)-1db]**

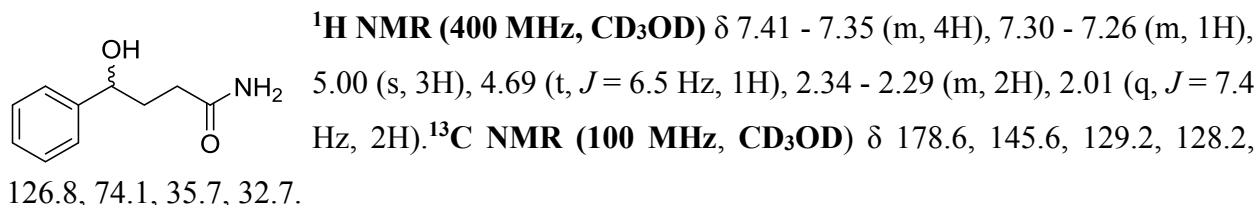

**Synthesis of (*R*)-1ea from (*R*)-1e:**

To a stirred solution of  $\gamma$ -nitroalcohol (*R*)-1e (58.7 mg, 0.32 mmol) in MeOH (10 mL), 51.3 mg of Pd/C (10 mol%) was added. The mixture was stirred at room temperature for 6 h under a hydrogen balloon. Afterward, the reaction mixture was filtered through a pad of Celite, which was then washed with 30 mL of MeOH. The filtrate was dried over anhydrous  $Na_2SO_4$  and concentrated, giving the desired chiral product (*R*)-1ea as a colorless liquid. The (*rac*)-1ea was obtained from commercial suppliers and used as a standard for chiral HPLC analysis.

**(*R*)-3-amino-1-phenylpropan-1-ol [(*R*)-1ea]**

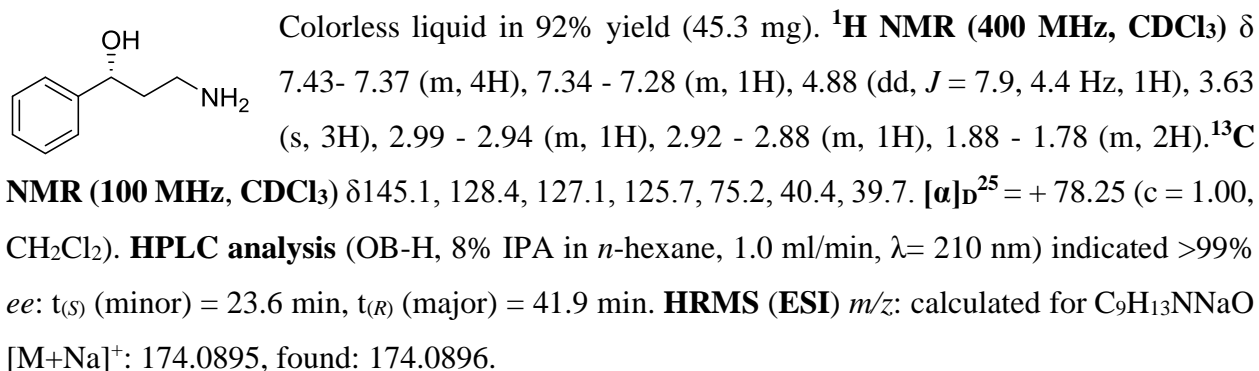

**Synthesis of (*R*)-1fa from (*R*)-1f:**

To a 10-mL round-bottom flask, 47.5 mg (0.31 mmol) of  $\gamma$ -diol (*R*)-1f, 1 mL of DCM, and 150  $\mu$ L (1.08 mmol) of  $Et_3N$  were added. The flask was cooled to 0  $^{\circ}C$ , followed by dropwise addition of 50  $\mu$ L (0.41 mmol) of pivaloyl chloride. The reaction mixture was then stirred at room temperature for 6 h. Afterward, the reaction mixture was quenched with 2 mL of distilled water, extracted with

DCM ( $3 \times 2$  mL), and washed with saturated brine. The organic layer was then dried over anhydrous  $\text{Na}_2\text{SO}_4$  and concentrated under reduced pressure to obtain the crude product. The resulting mixture was purified by flash chromatography (petroleum ether: ethyl acetate = 10:1) to afford the desired chiral product (*R*)-**1fa** as a colorless liquid. The (*rac*)-**1fa** was synthesized from (*rac*)-**1f** according to the same procedures and used as a standard for chiral HPLC analysis.

**(*R*)-3-hydroxy-3-phenylpropyl pivalate [(*R*)-1fa]**

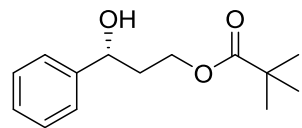

Colorless liquid in 83% yield (61.4 mg).  $^1\text{H}$  NMR (400 MHz,  $\text{CDCl}_3$ )  $\delta$  7.38 - 7.33 (m, 4H), 7.30 - 7.27 (m, 1H), 4.76 (dd,  $J = 8.3, 5.0$  Hz, 1H), 4.30 (ddd,  $J = 13.1, 7.6, 5.5$  Hz, 1H), 4.08 (dt,  $J = 11.2, 5.8$  Hz, 1H), 2.59 (s, 1H), 2.12 - 1.98 (m, 2H), 1.21 (s, 9H).  $^{13}\text{C}$  NMR (100 MHz,  $\text{CDCl}_3$ )  $\delta$  178.9, 144.0, 128.7, 127.8, 125.8, 71.4, 61.6, 38.9, 38.2, 27.3.  $[\alpha]_D^{25} = +9.80$  ( $c = 1.00$ ,  $\text{CH}_2\text{Cl}_2$ ). HPLC analysis (OX-3, 3% IPA in *n*-hexane, 0.7 ml/min,  $\lambda = 210$  nm) indicated 87.8% *ee*:  $t_{(S)}$  (minor) = 24.1 min,  $t_{(R)}$  (major) = 25.4 min. HRMS (ESI)  $m/z$ : calculated for  $\text{C}_{14}\text{H}_{20}\text{NaO}_3$   $[\text{M}+\text{Na}]^+$ : 259.1310, found: 259.1317.

**(*rac*)-3-hydroxy-3-phenylpropyl pivalate [(*rac*)-1fa]**

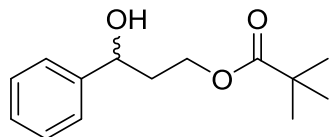

$^1\text{H}$  NMR (400 MHz,  $\text{CDCl}_3$ )  $\delta$  7.37 - 7.27 (m, 5H), 4.76 (dd,  $J = 8.2, 5.0$  Hz, 1H), 4.29 (ddd,  $J = 13.1, 7.6, 5.5$  Hz, 1H), 4.07 (dt,  $J = 11.2, 5.9$  Hz, 1H), 2.84 (s, 1H), 2.12 - 1.96 (m, 2H), 1.21 (s, 9H).  $^{13}\text{C}$  NMR (100 MHz,  $\text{CDCl}_3$ )  $\delta$  178.9, 144.0, 128.6, 127.7, 125.8, 71.3, 61.6, 38.8, 38.1, 27.2.



## 10. Copies of NMR spectra

### (S)-3-chloro-1-phenylpropan-1-ol [(S)-1a]

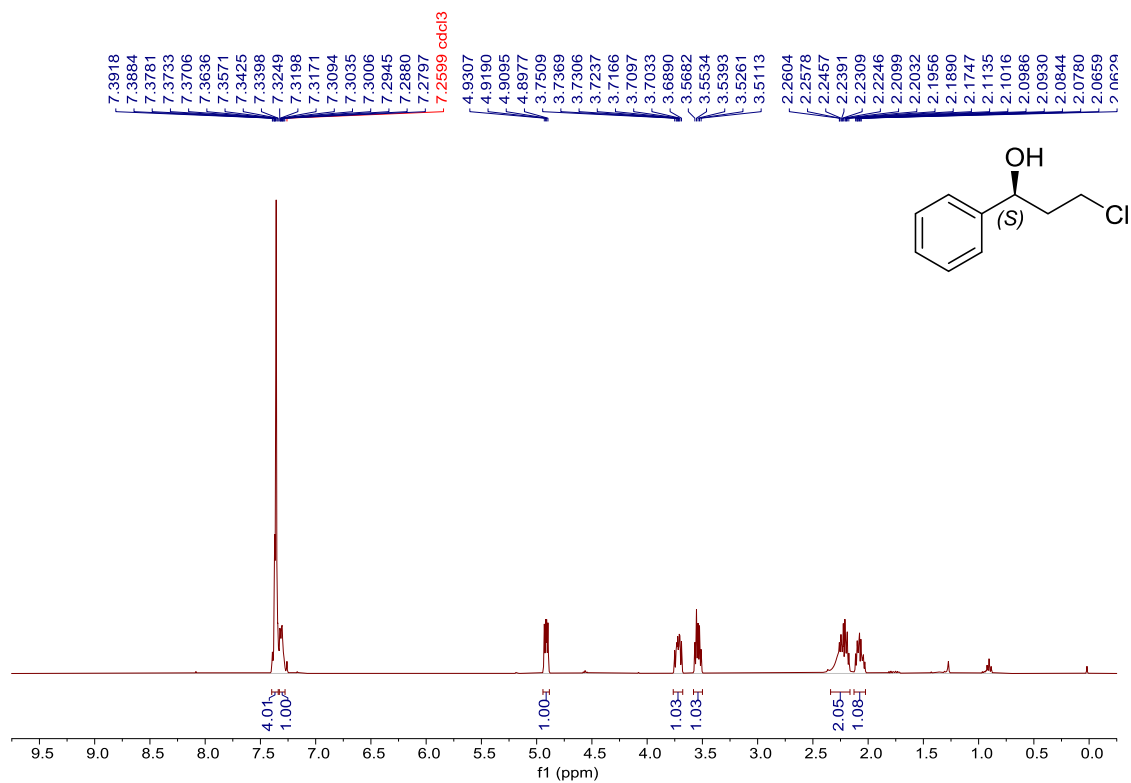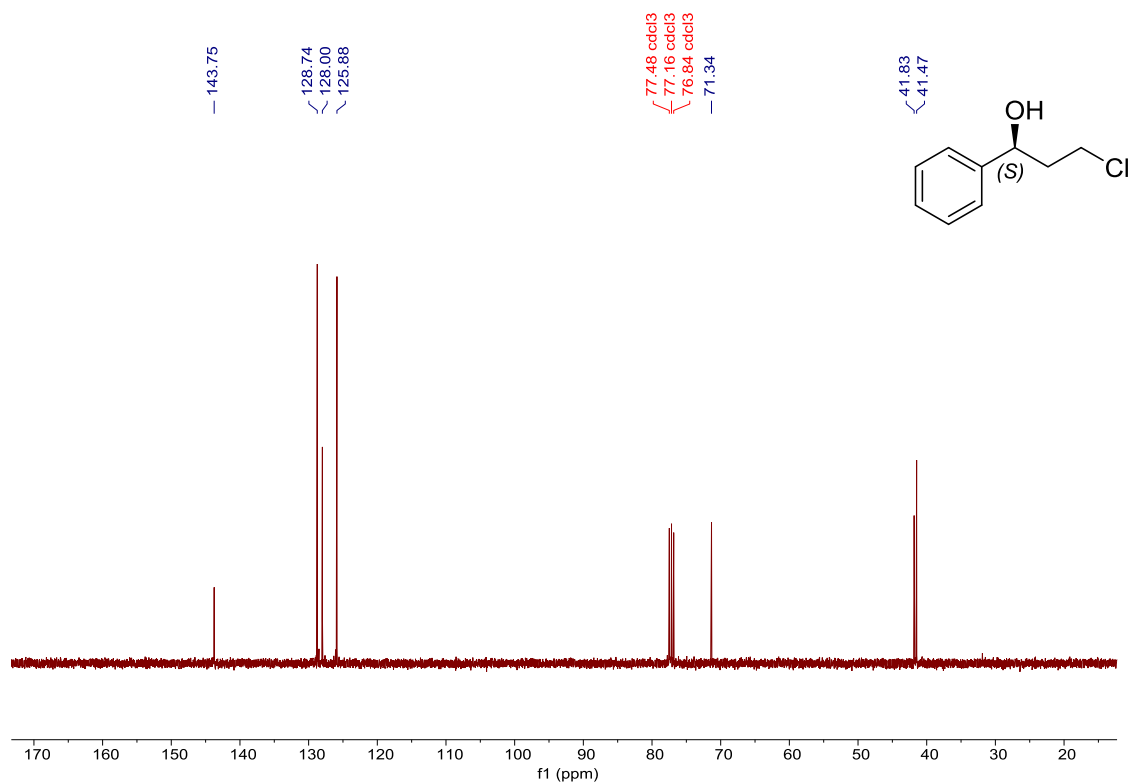

**(S)-3-chloro-1-(2-fluorophenyl)propan-1-ol [(S)-2a]**

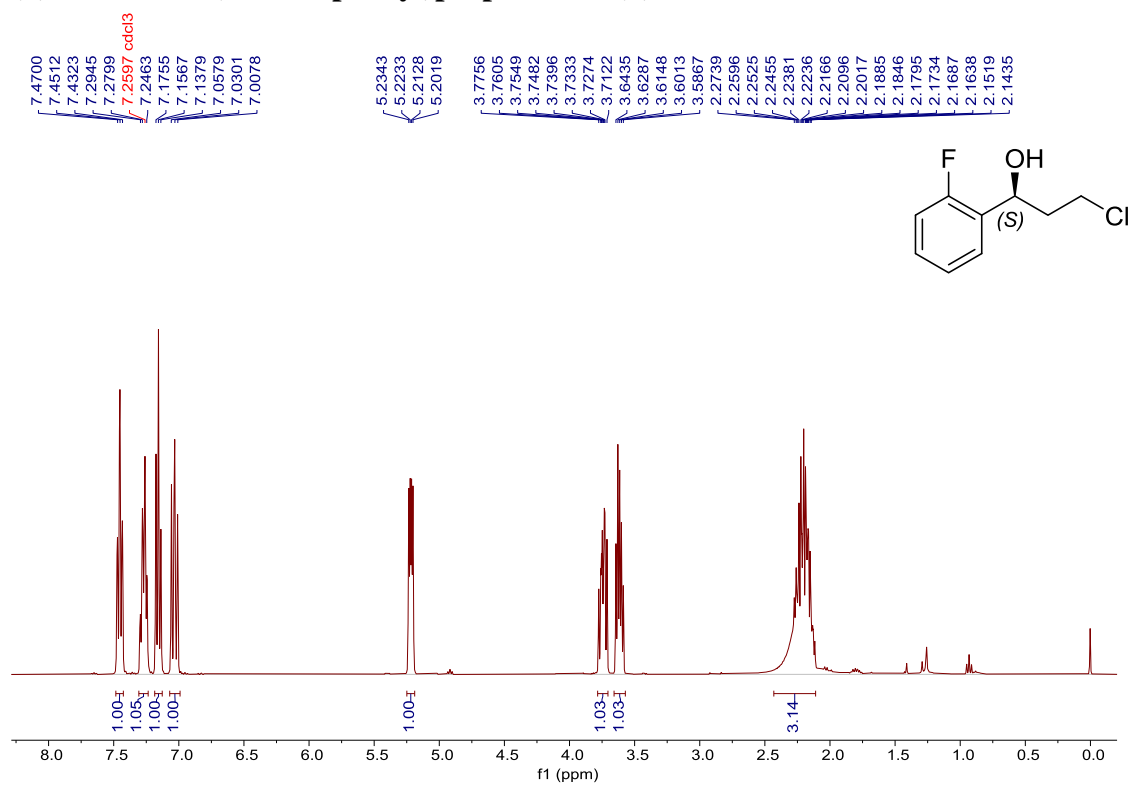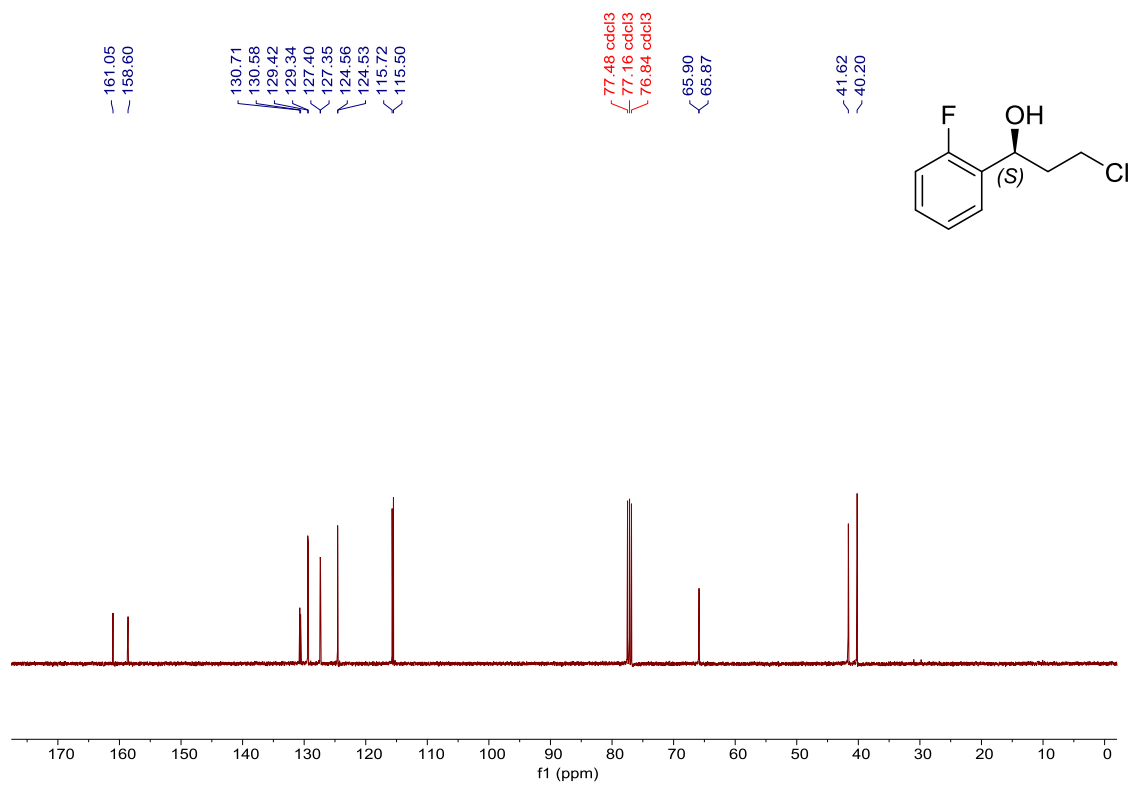

**(S)-3-chloro-1-(2-chlorophenyl)propan-1-ol [(S)-3a]**

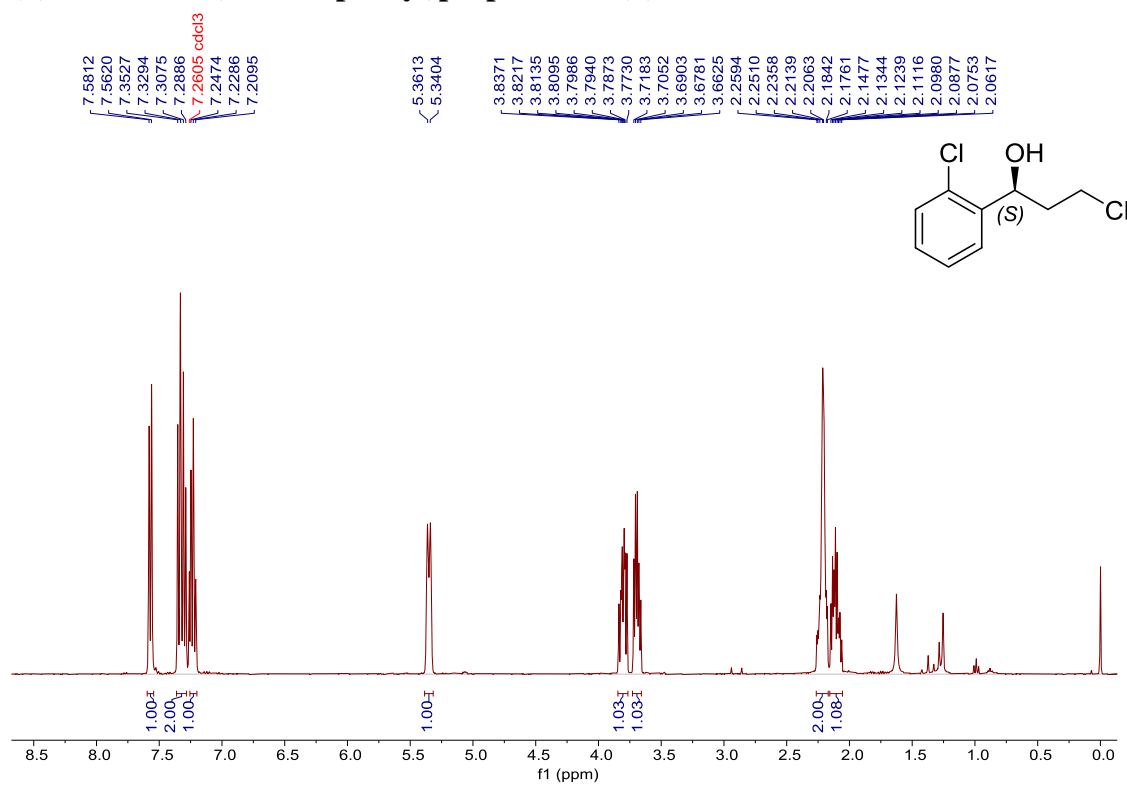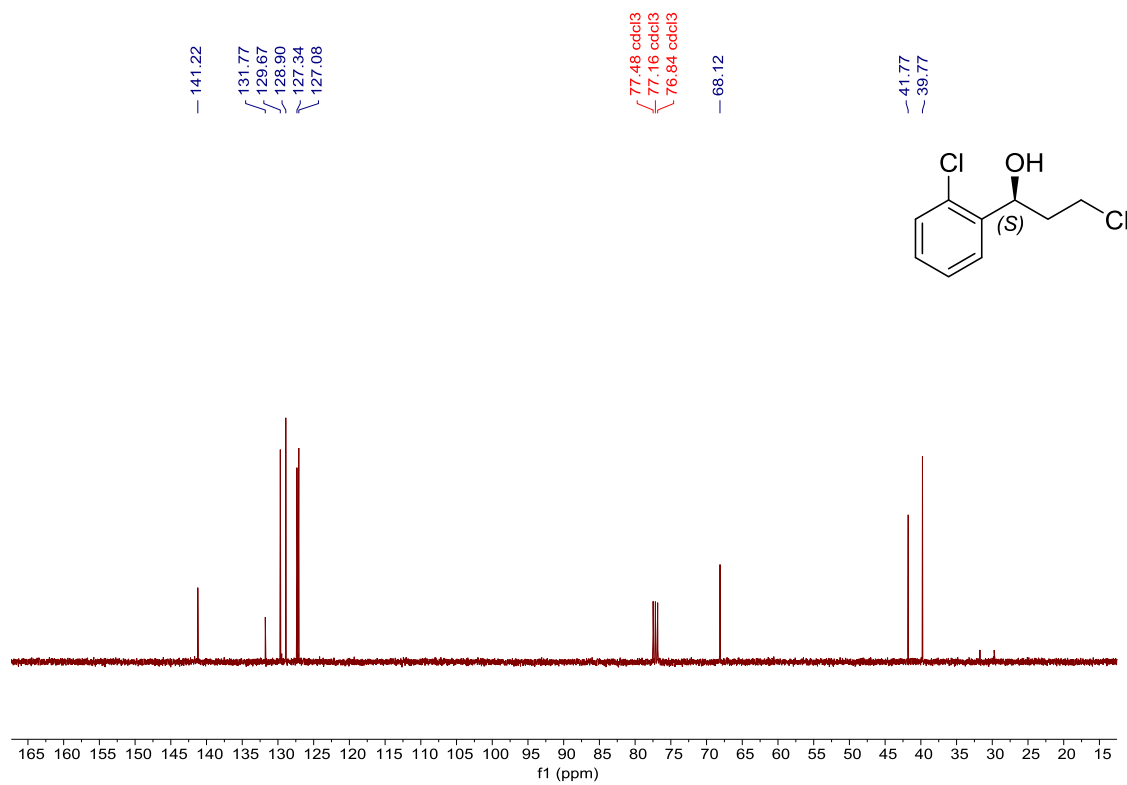

**(S)-1-(2-bromophenyl)-3-chloropropan-1-ol [(S)-4a]**

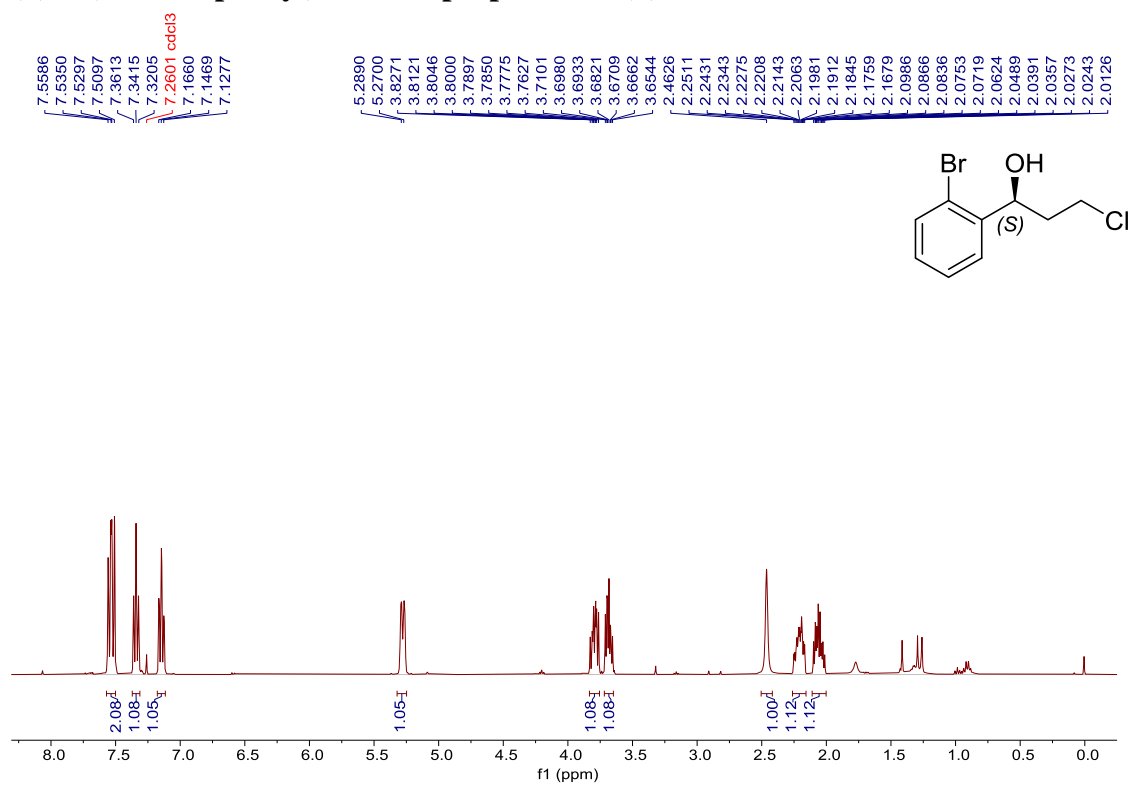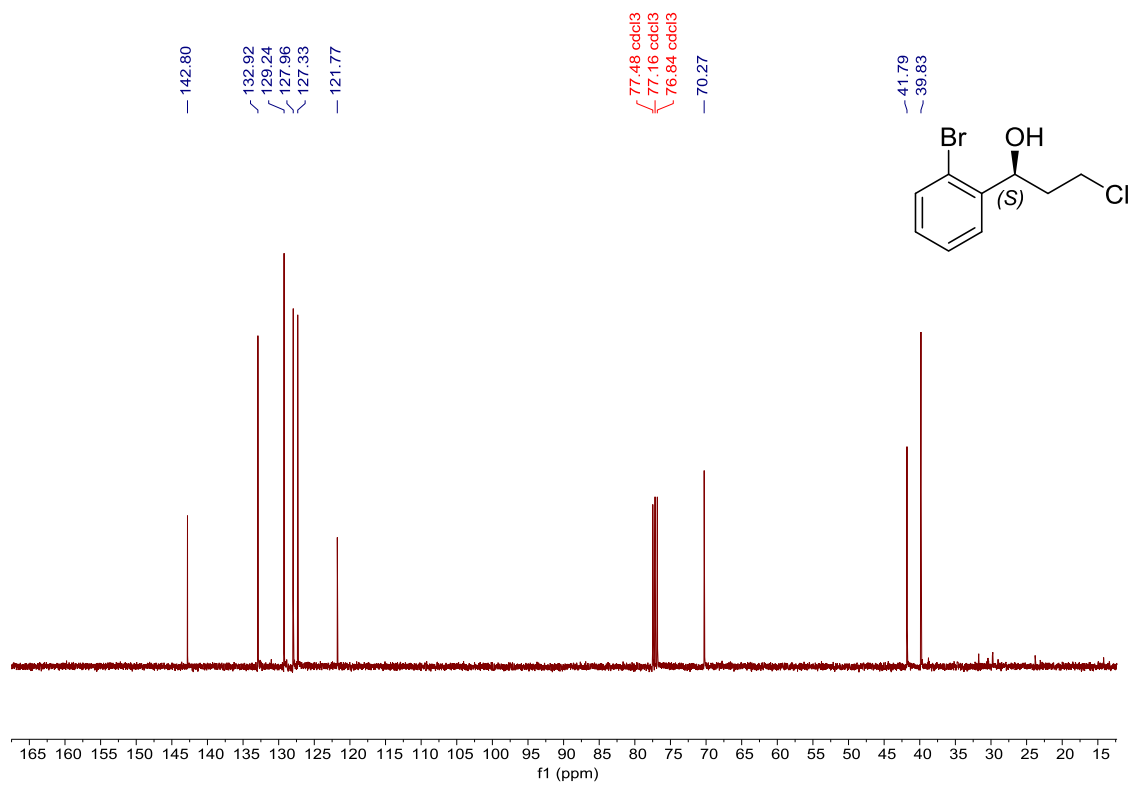

**(S)-3-chloro-1-(o-tolyl)propan-1-ol [(S)-5a]**

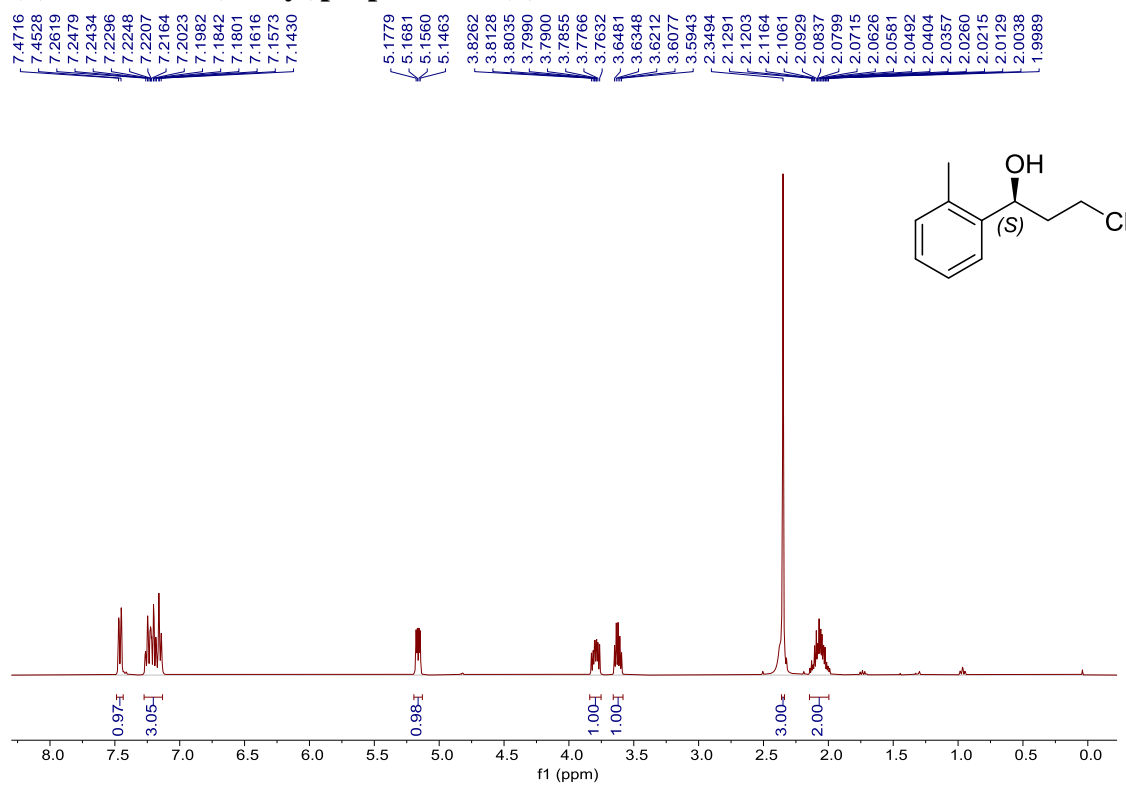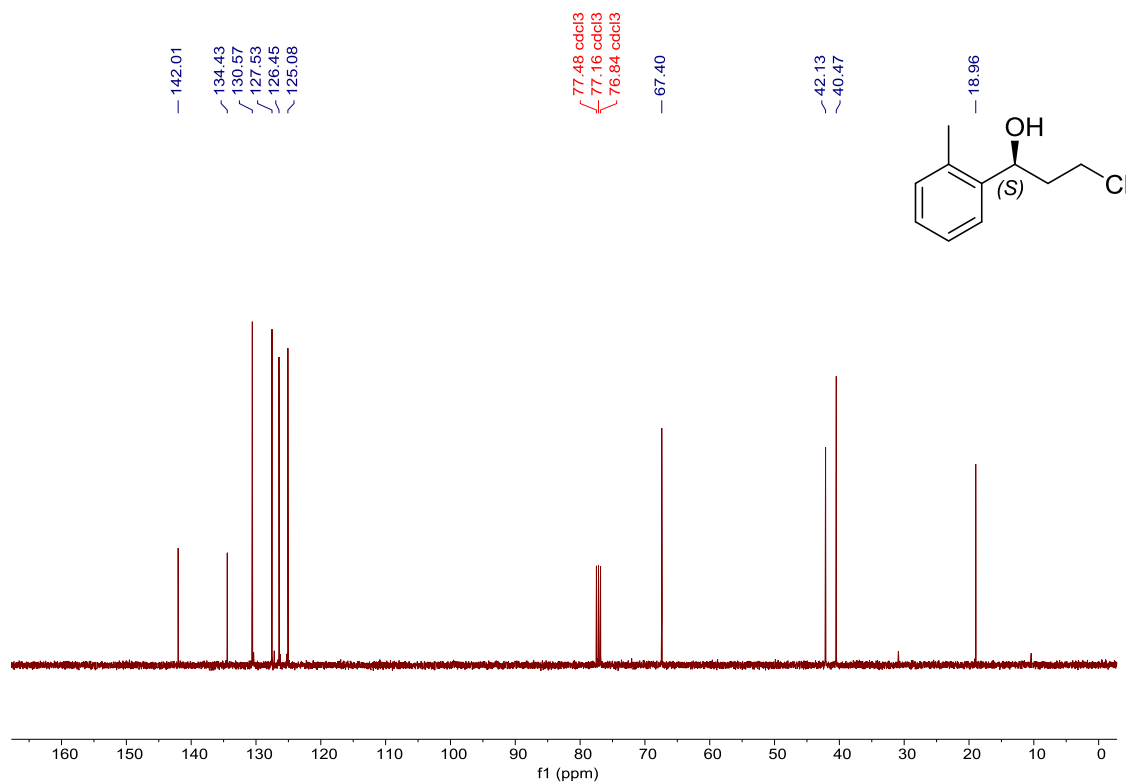

**(S)-3-chloro-1-(3-fluorophenyl)propan-1-ol [(S)-6a]**

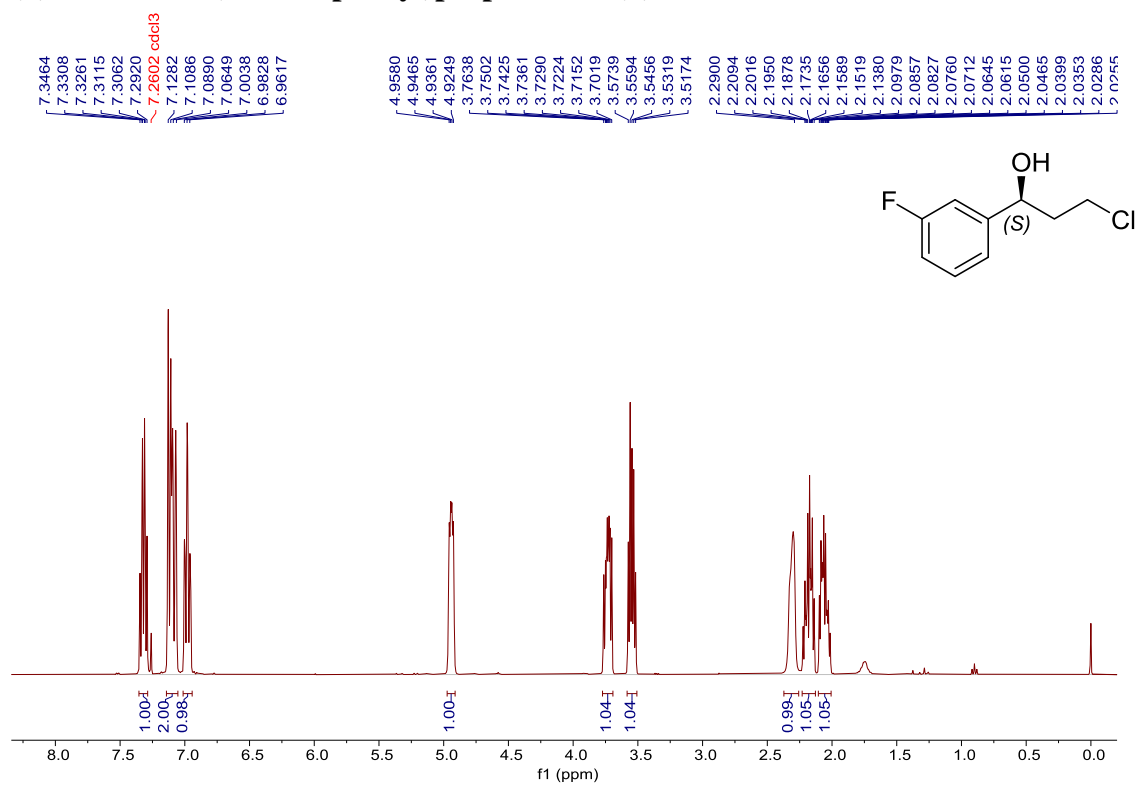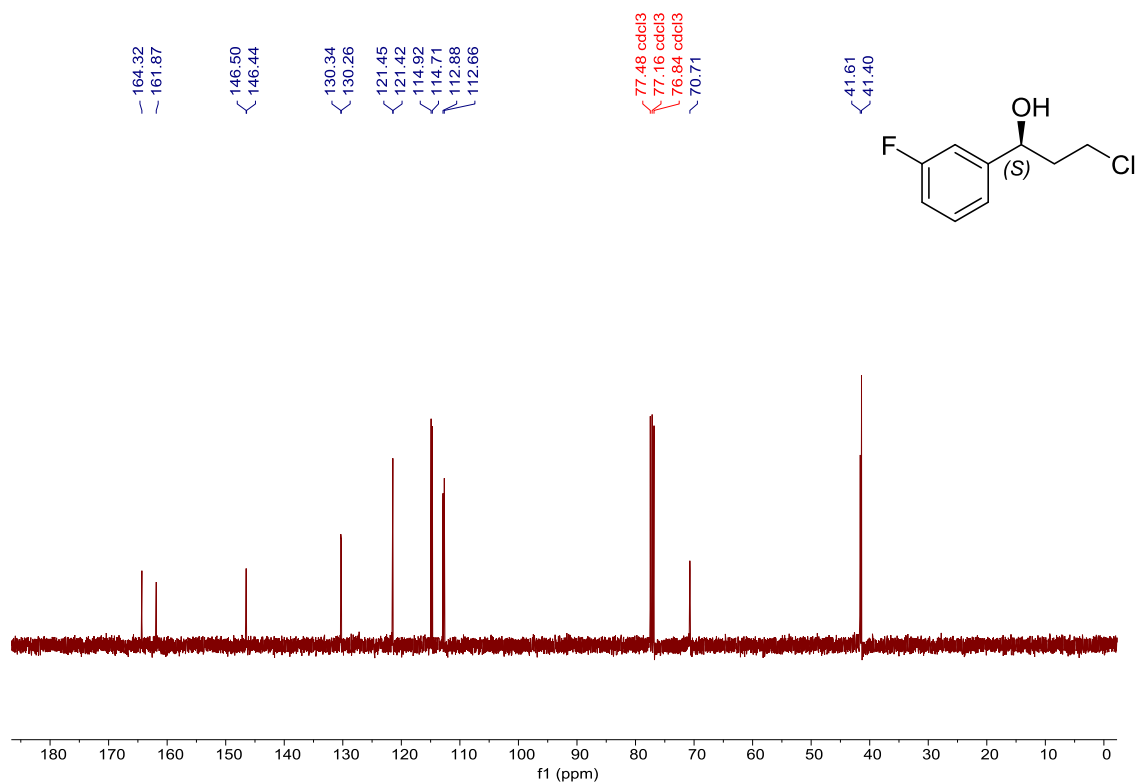

**(S)-3-chloro-1-(3-chlorophenyl)propan-1-ol [(S)-7a]**

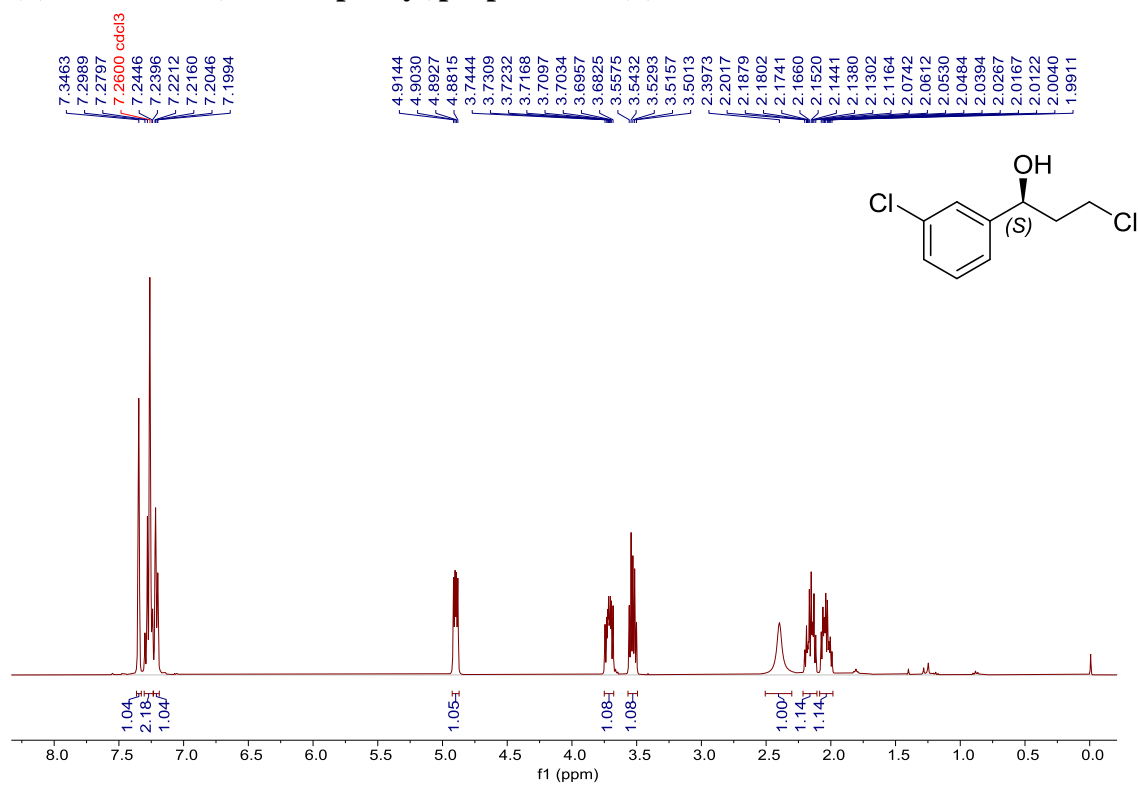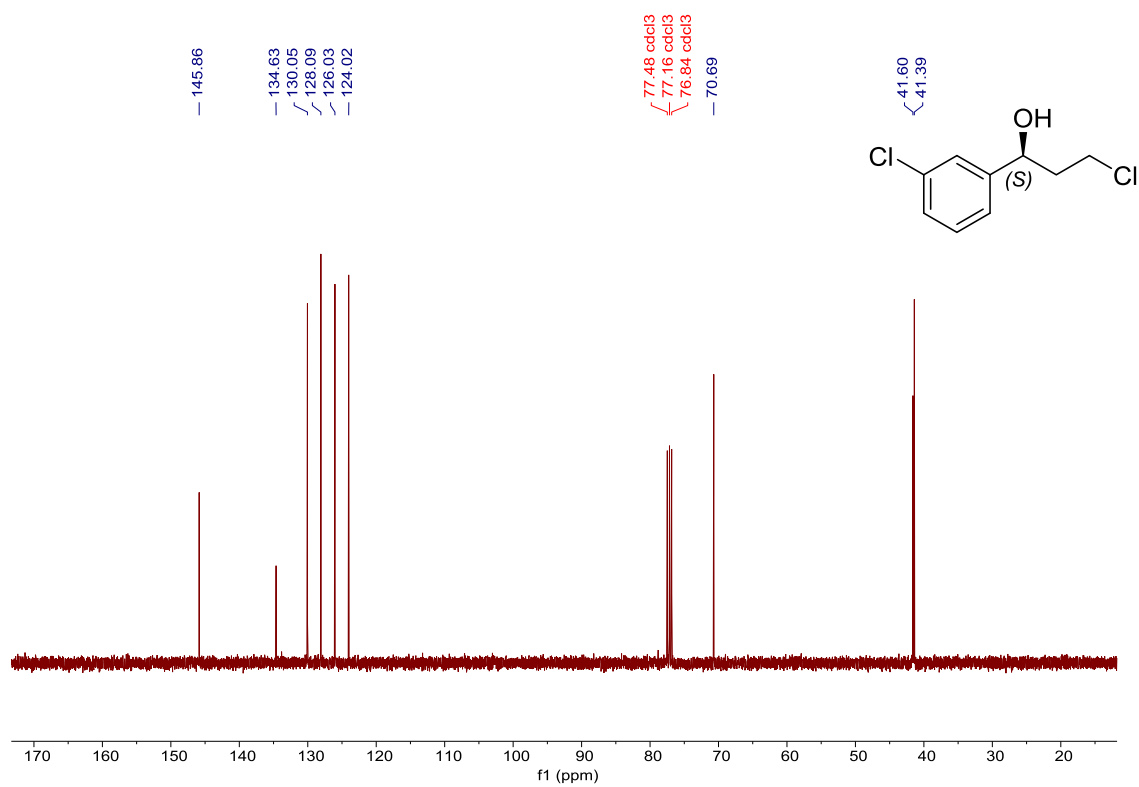

**(S)-1-(3-bromophenyl)-3-chloropropan-1-ol [(S)-8a]**

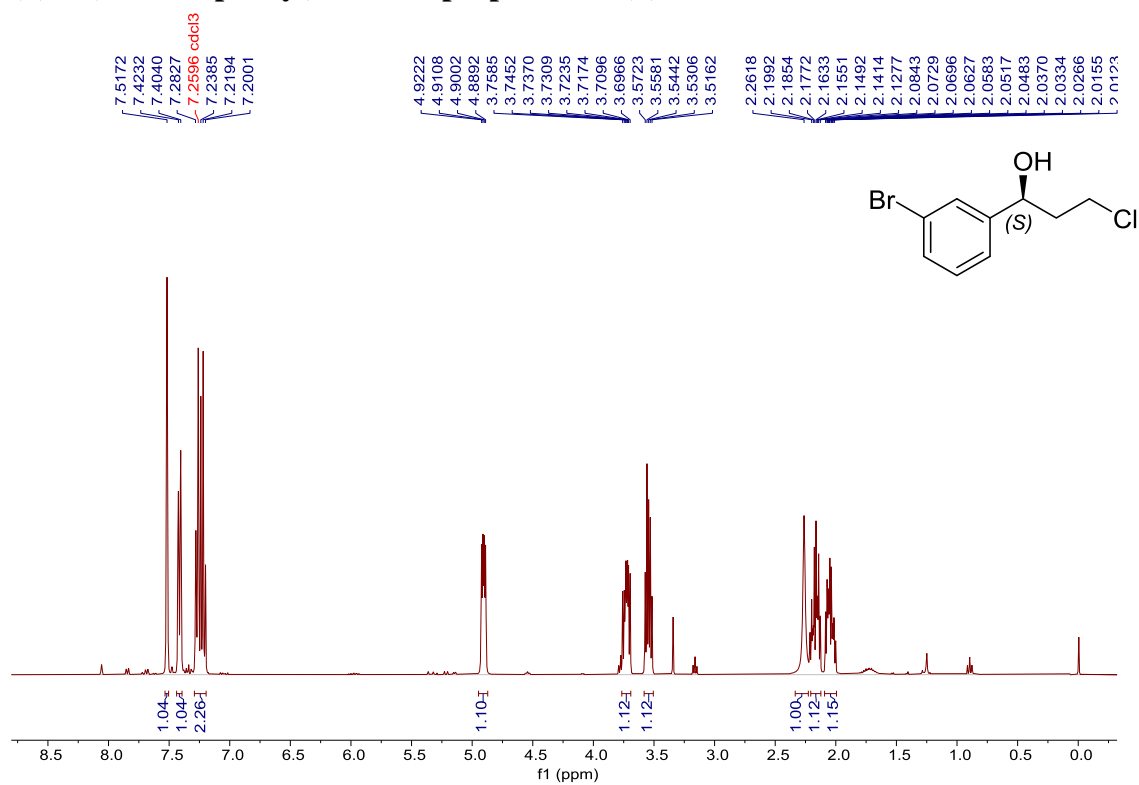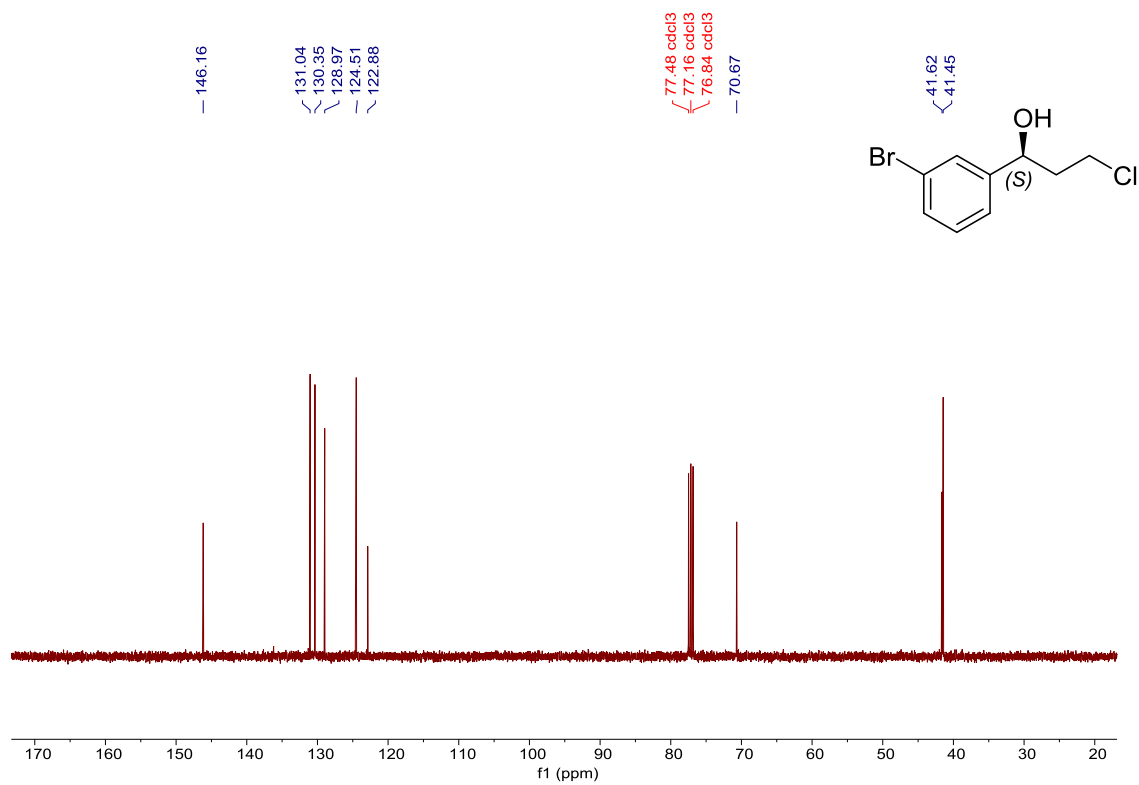



**(S)-3-chloro-1-(m-tolyl)propan-1-ol [(S)-9a]**

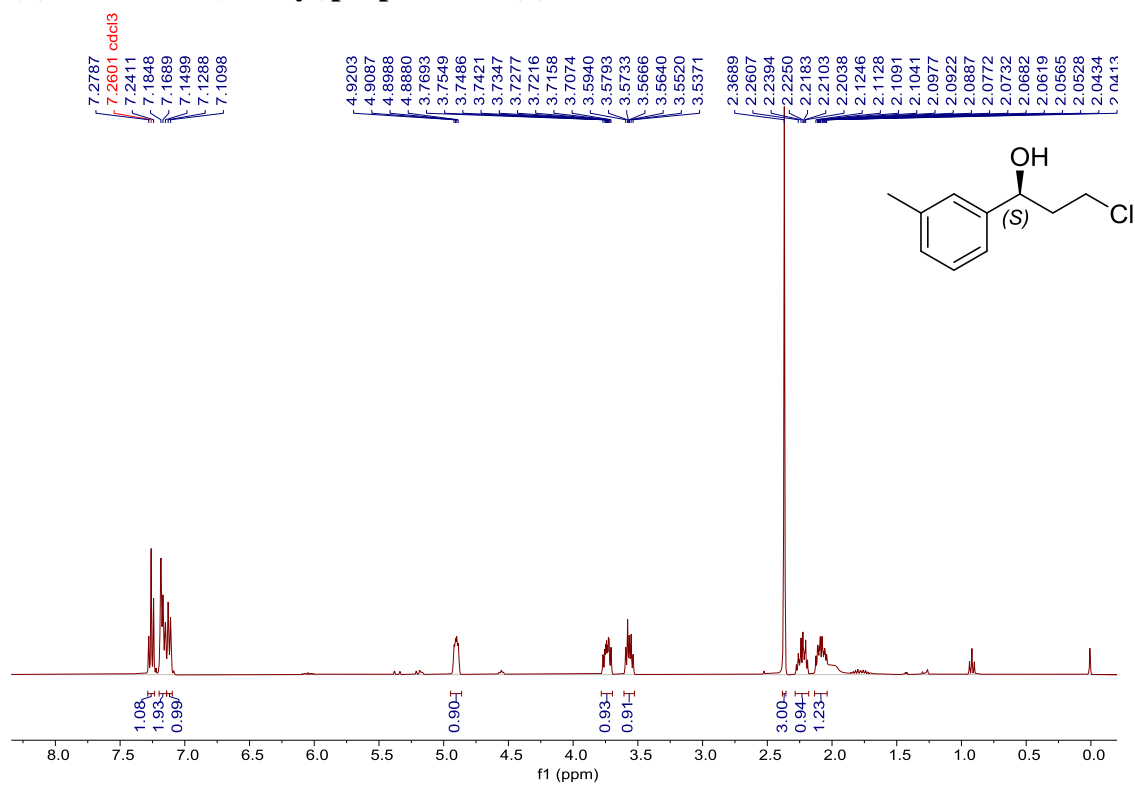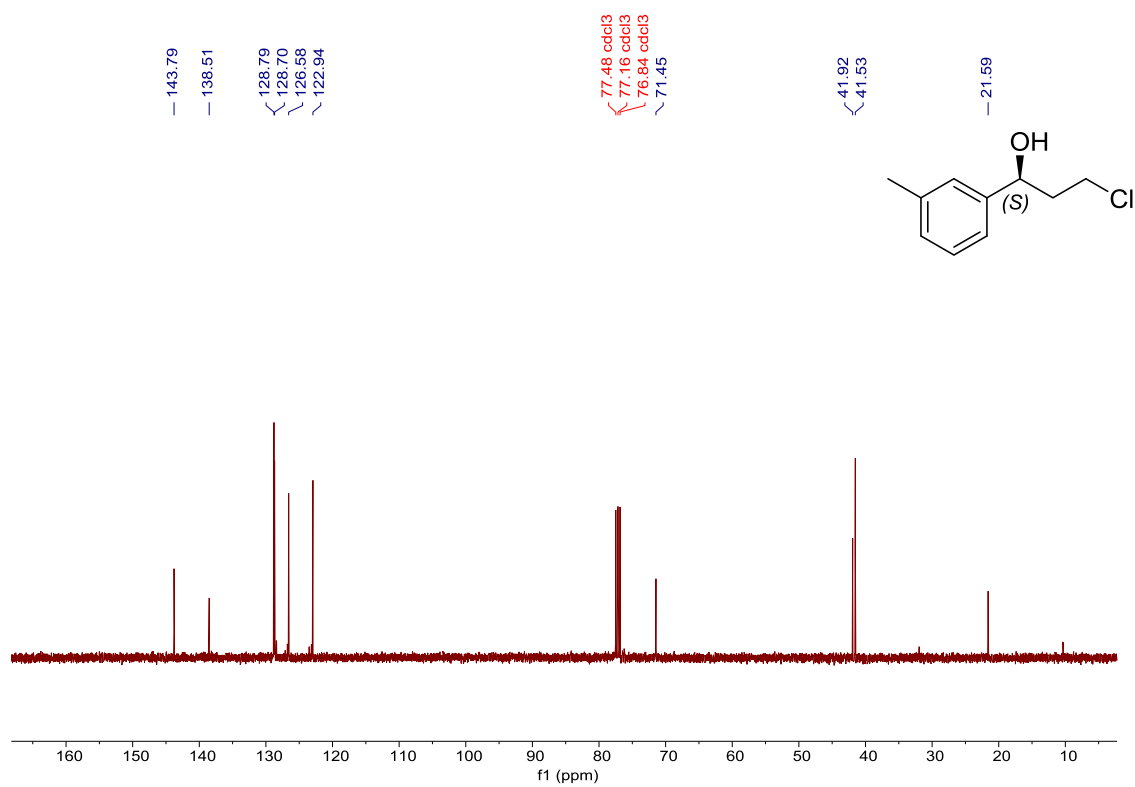

**(S)-3-chloro-1-(3-methoxyphenyl)propan-1-ol [(S)-10a]**

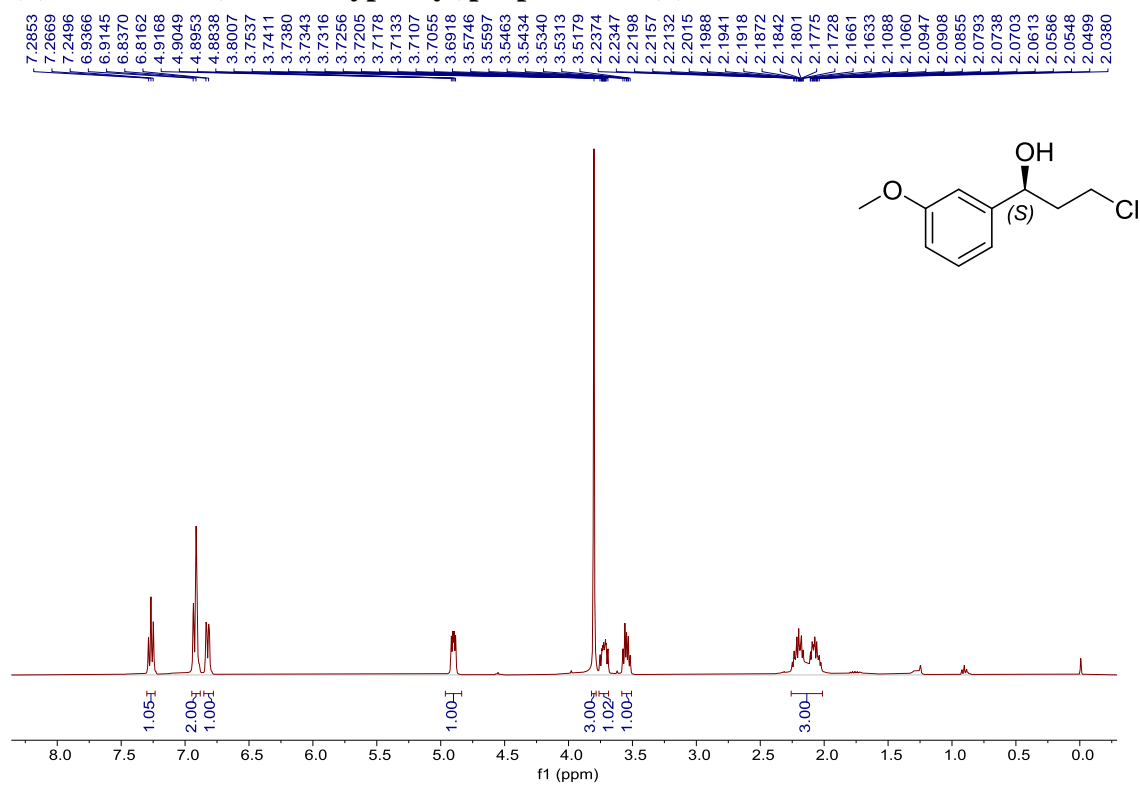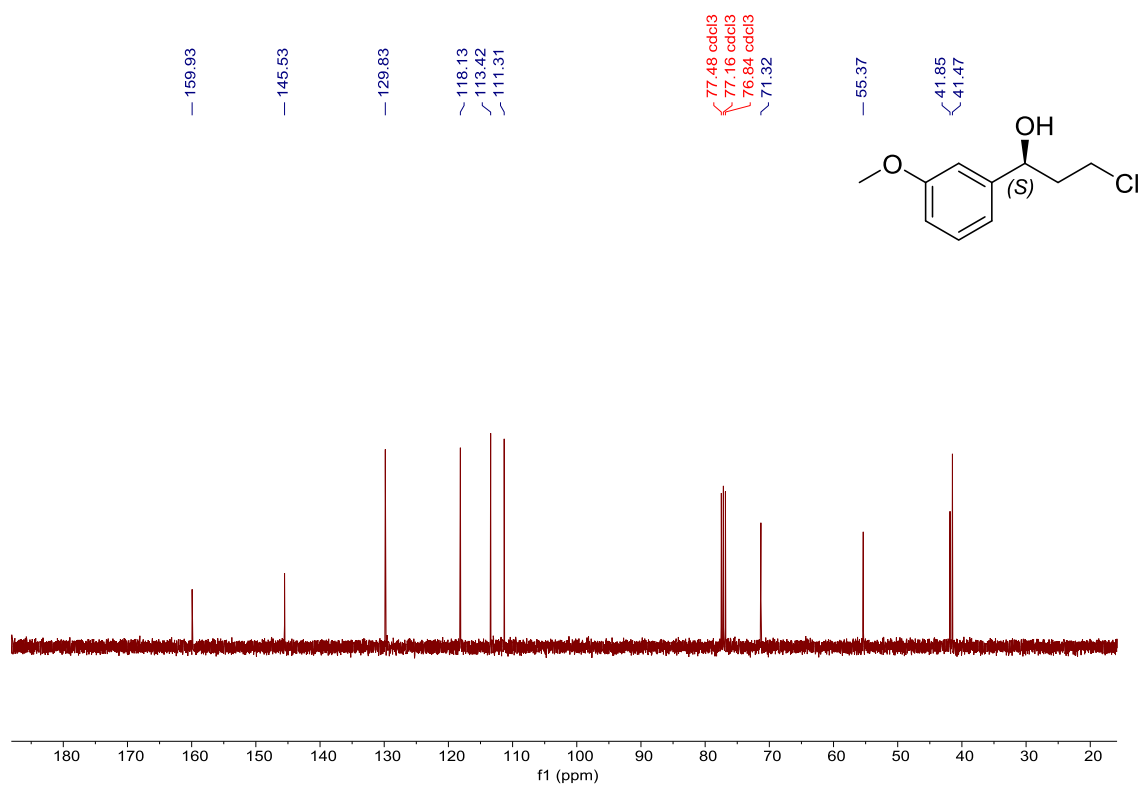

**(S)-3-chloro-1-(4-fluorophenyl)propan-1-ol [(S)-11a]**

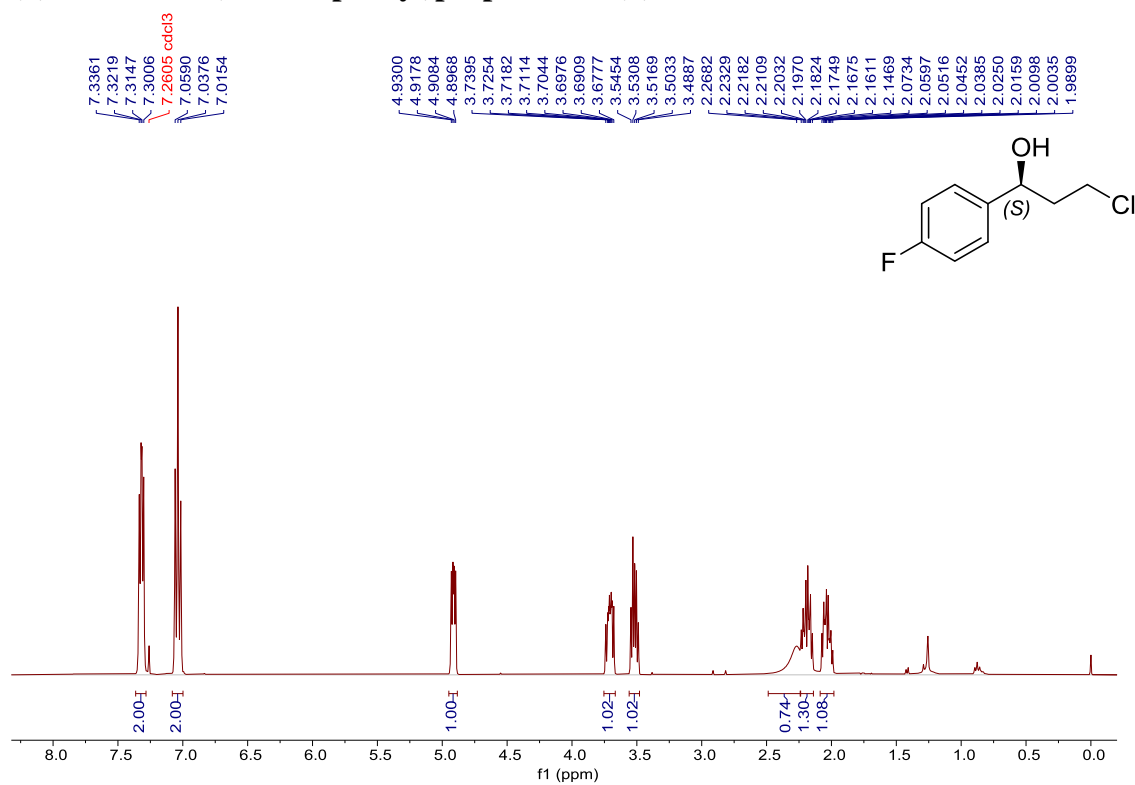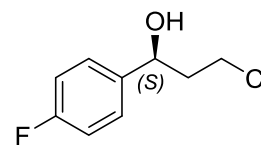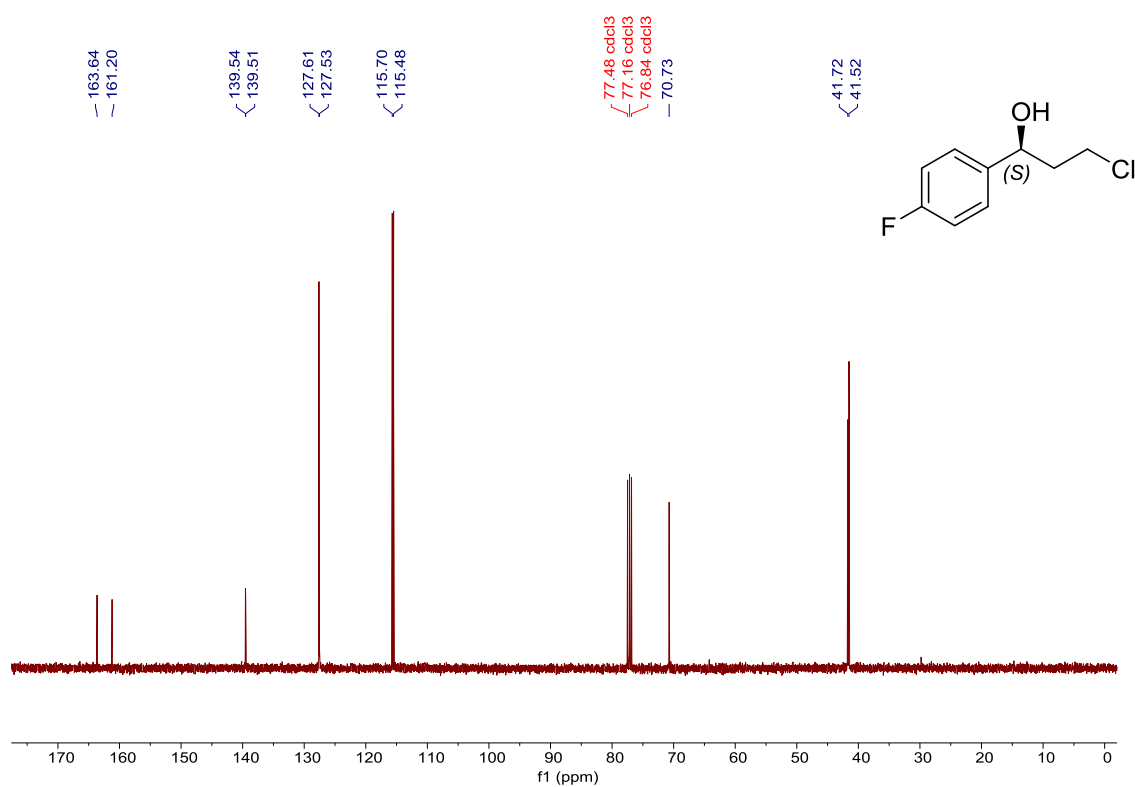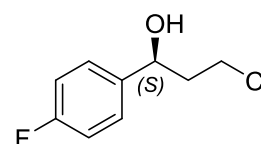

**(S)-3-chloro-1-(4-chlorophenyl)propan-1-ol [(S)-12a]**

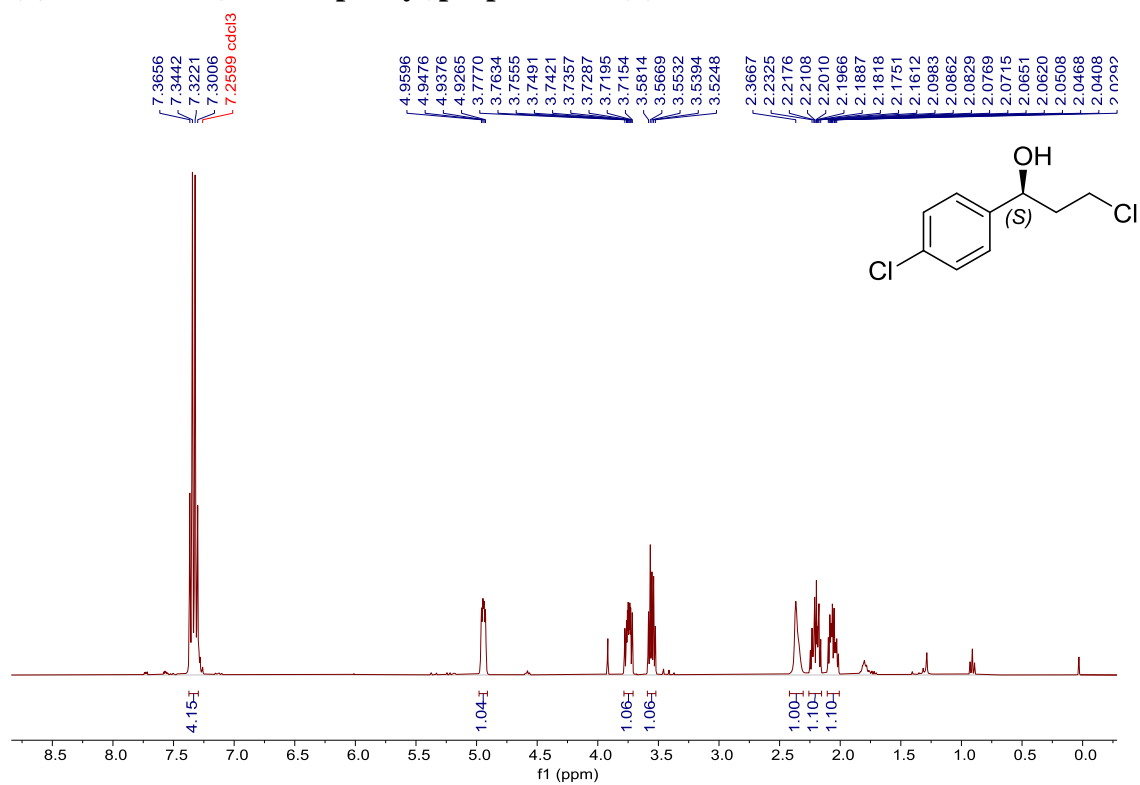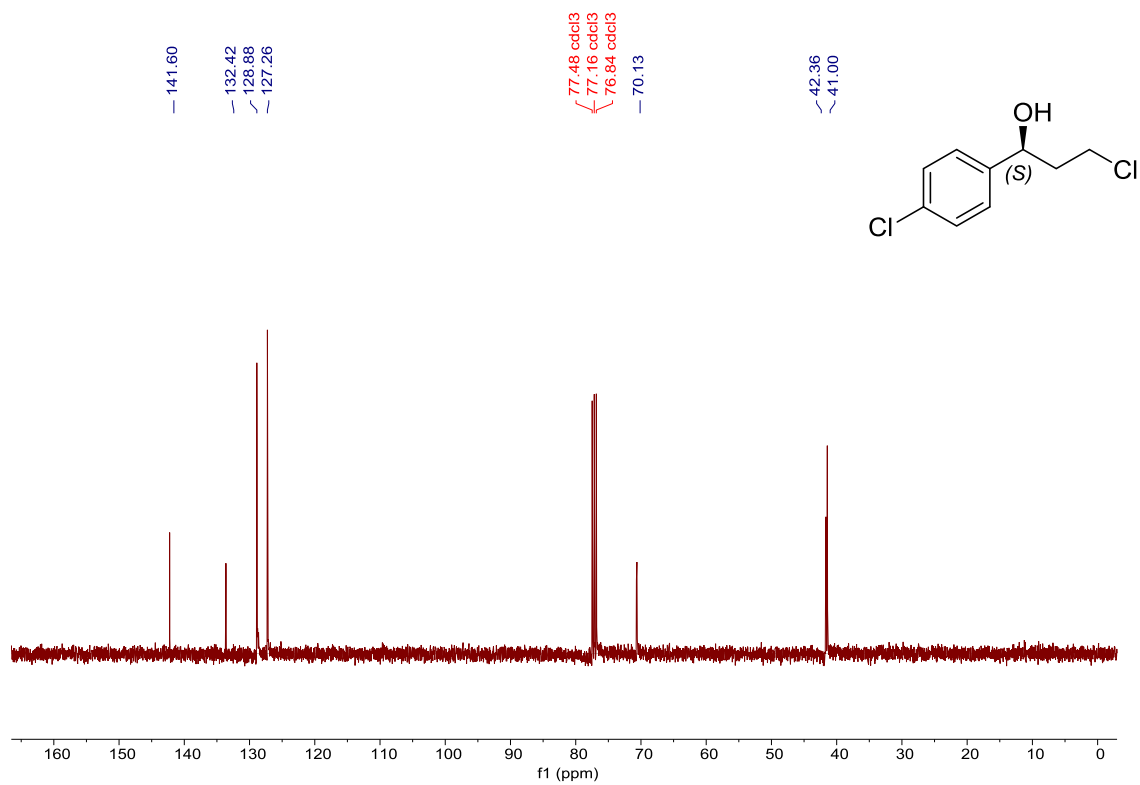

**(S)-1-(4-bromophenyl)-3-chloropropan-1-ol [(S)-13a]**

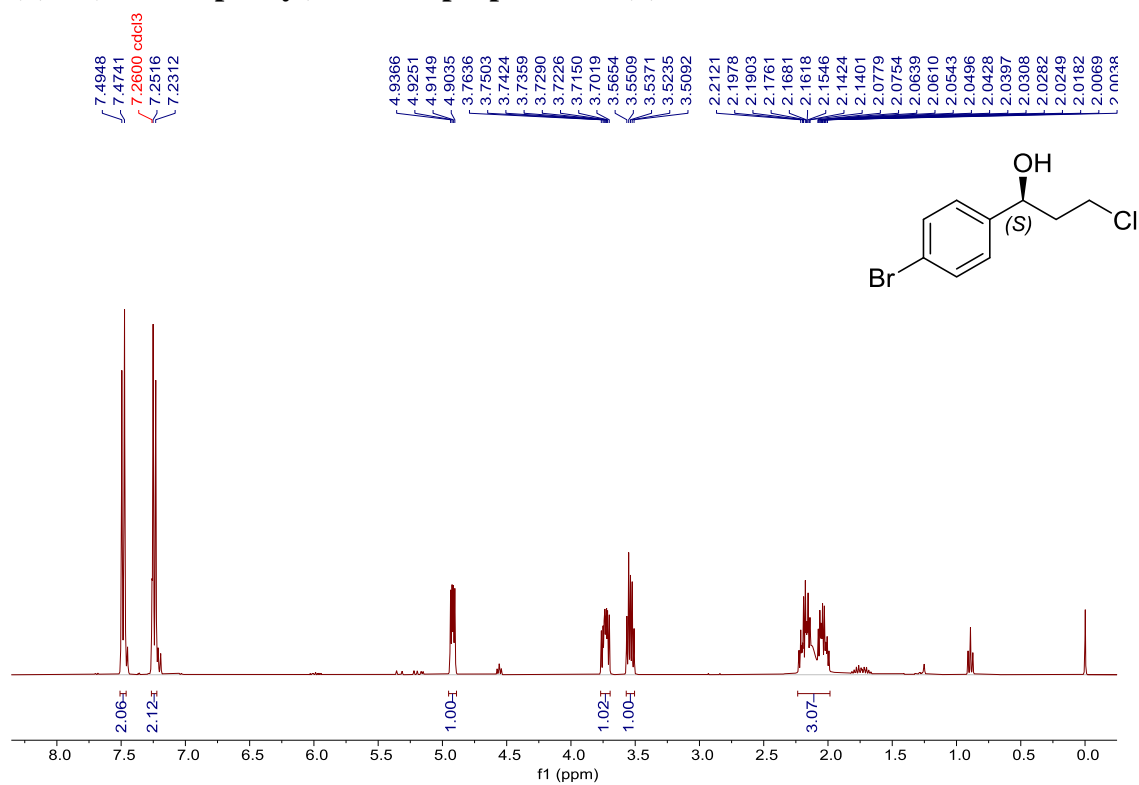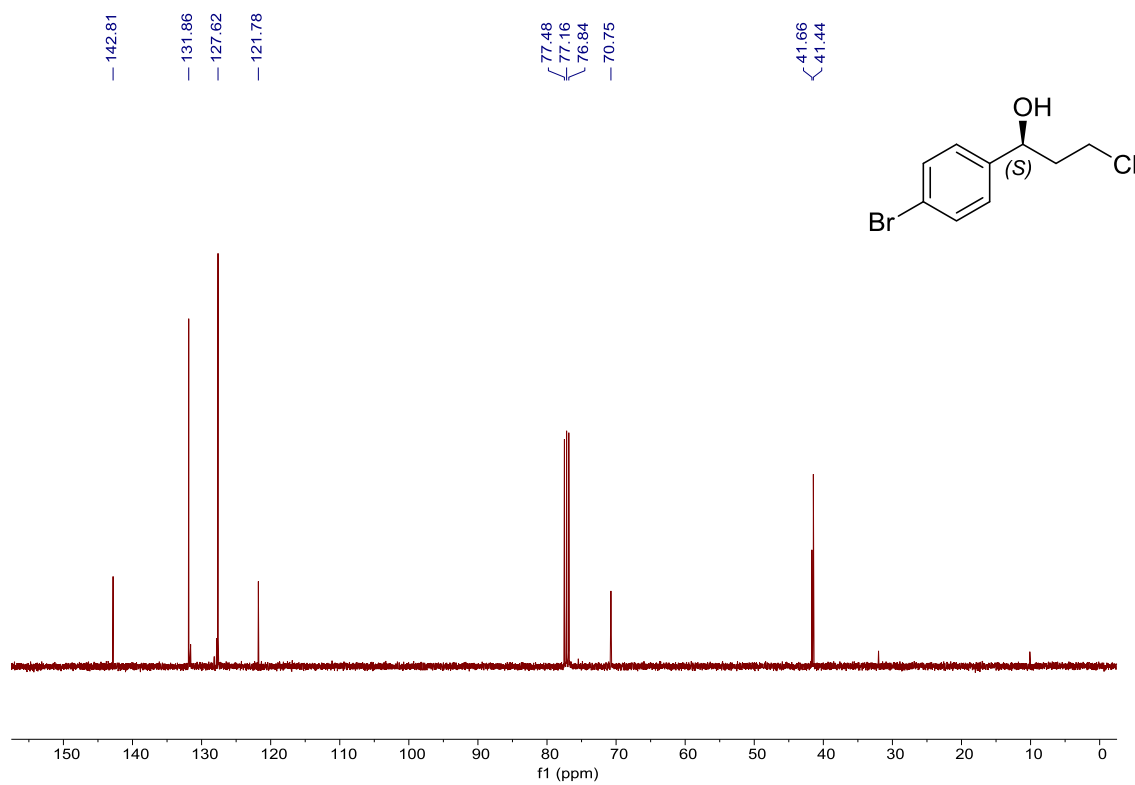

**(S)-3-chloro-1-(4-(trifluoromethyl)phenyl)propan-1-ol [(S)-14a]**

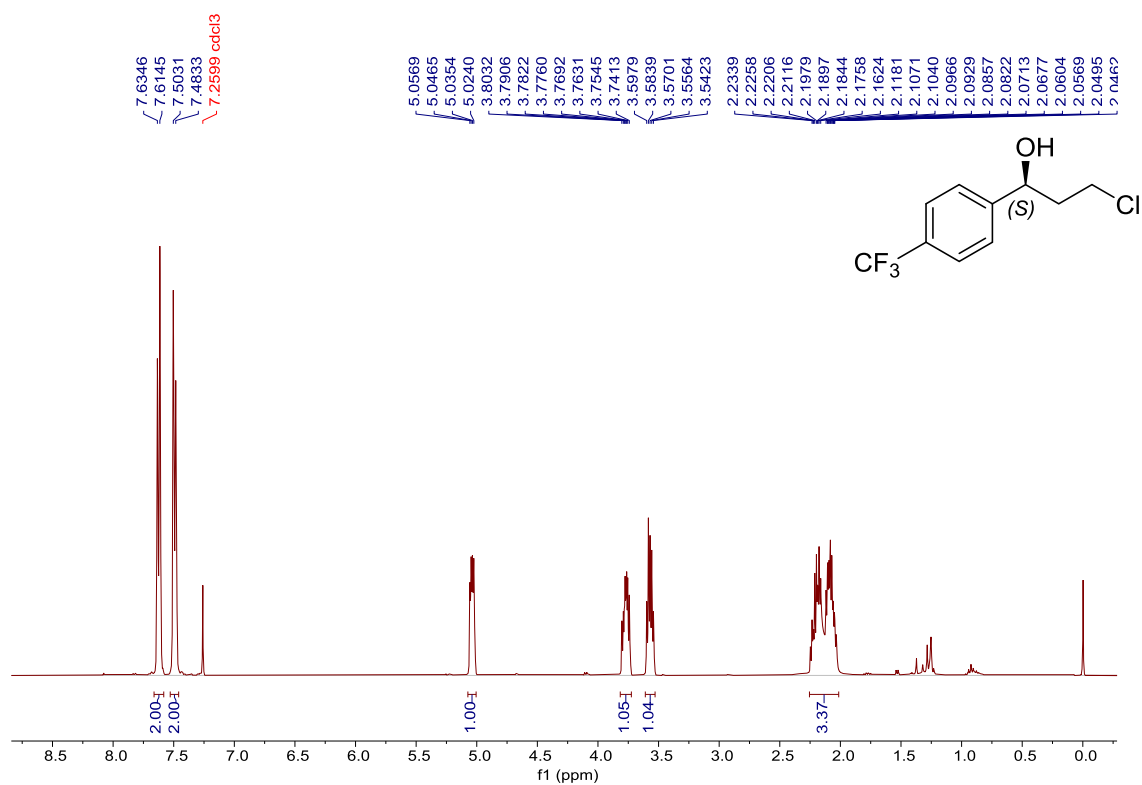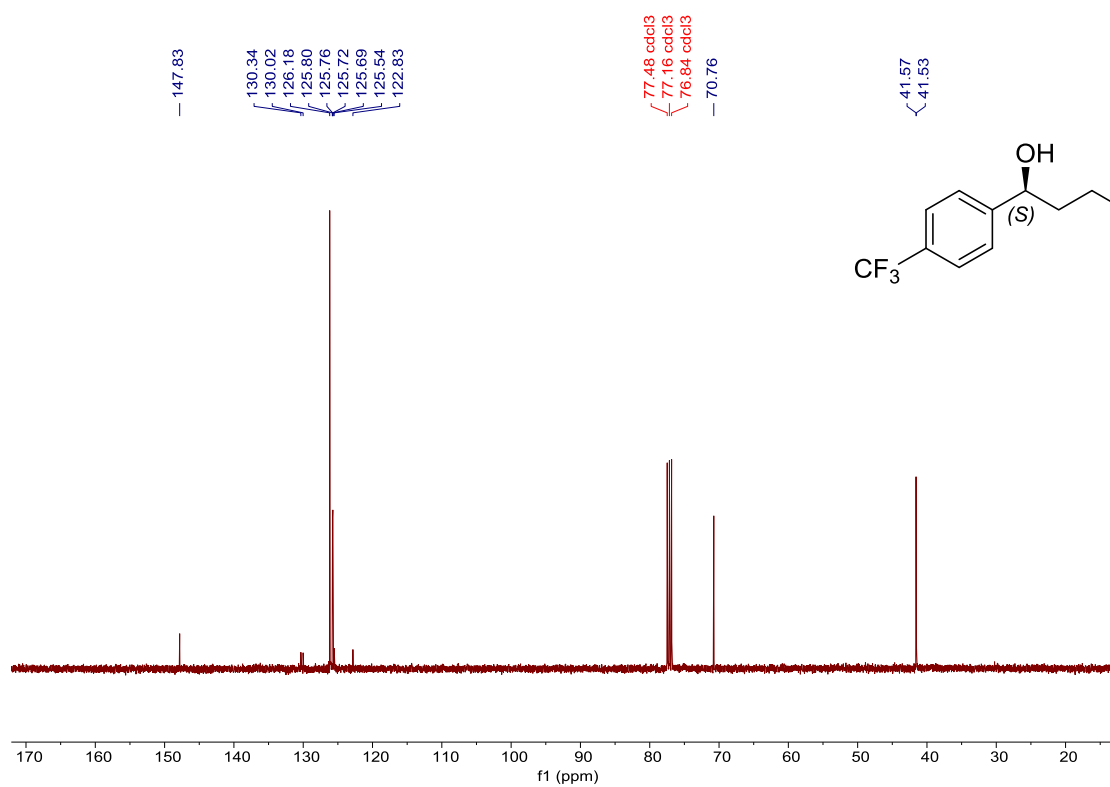

**(S)-3-chloro-1-(3,5-difluorophenyl)propan-1-ol [(S)-15a]**

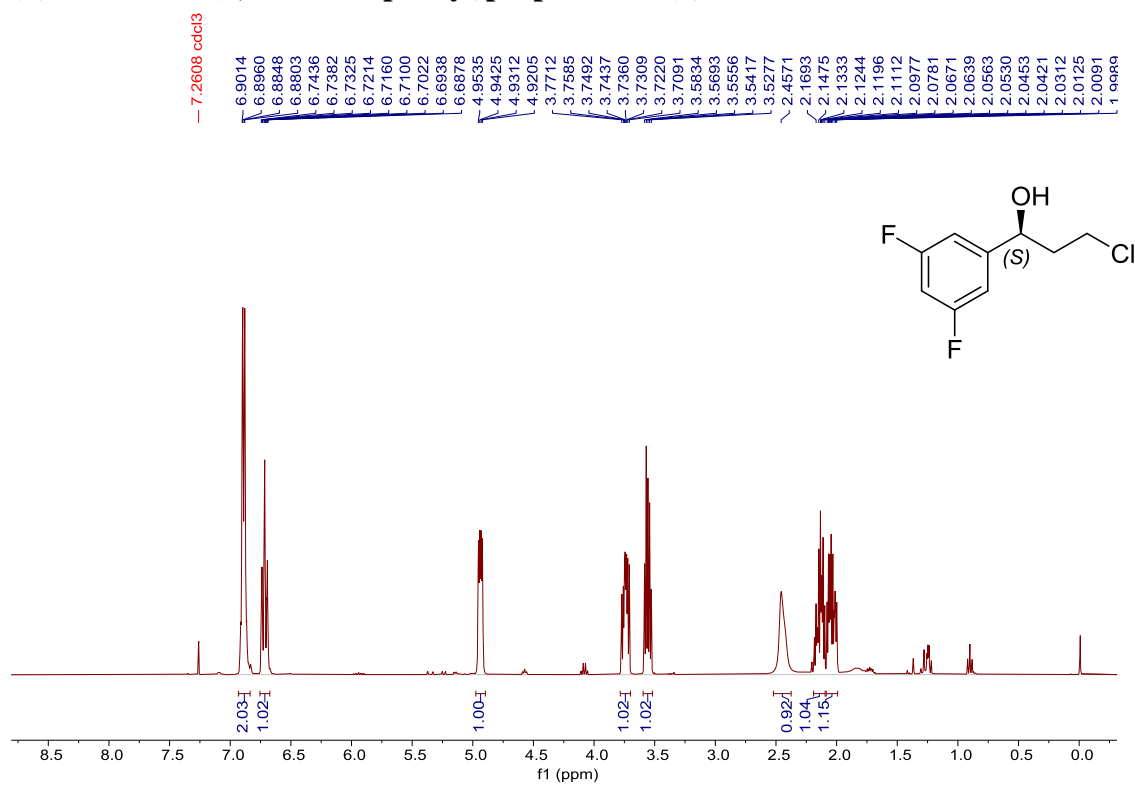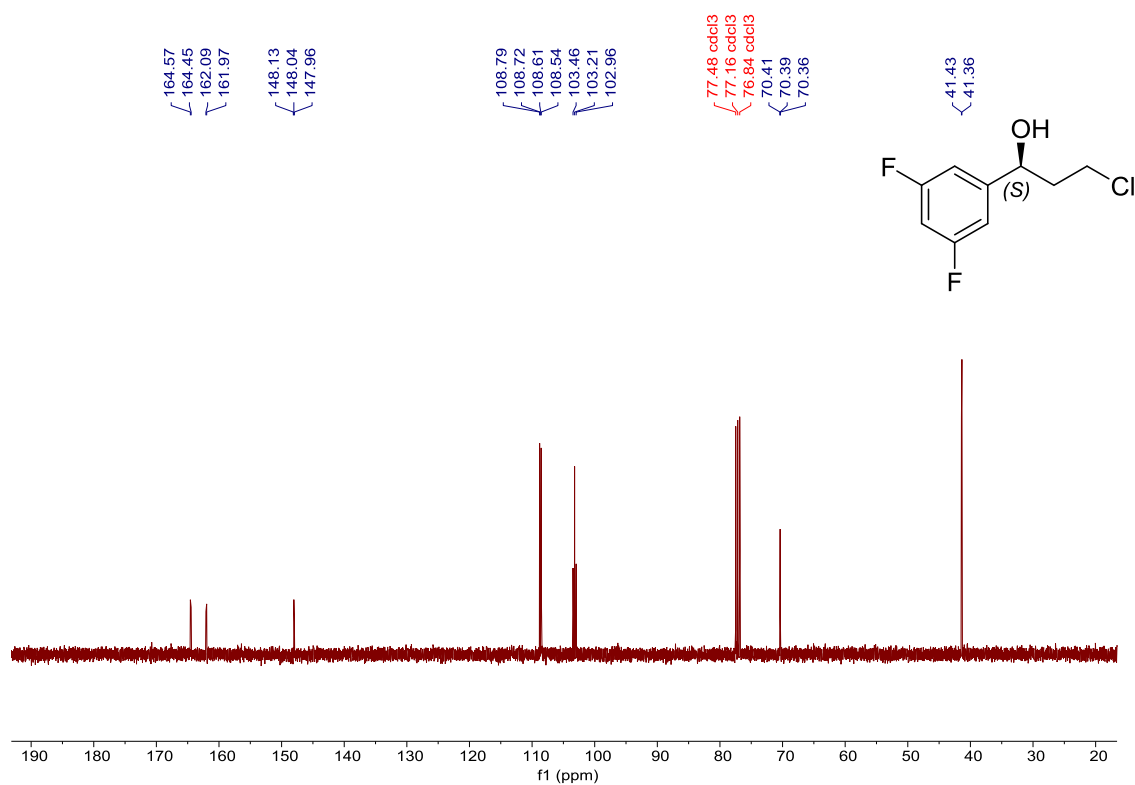

**(S)-3-chloro-1-(naphthalen-2-yl)propan-1-ol [(S)-16a]**

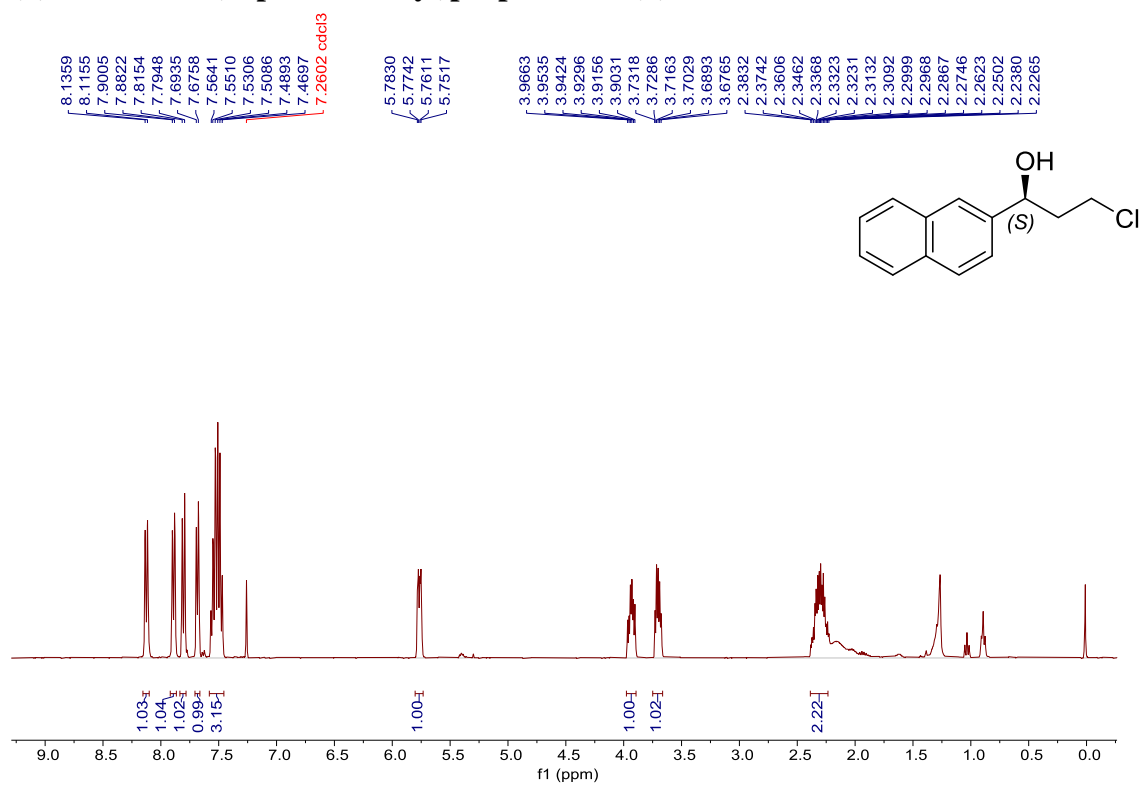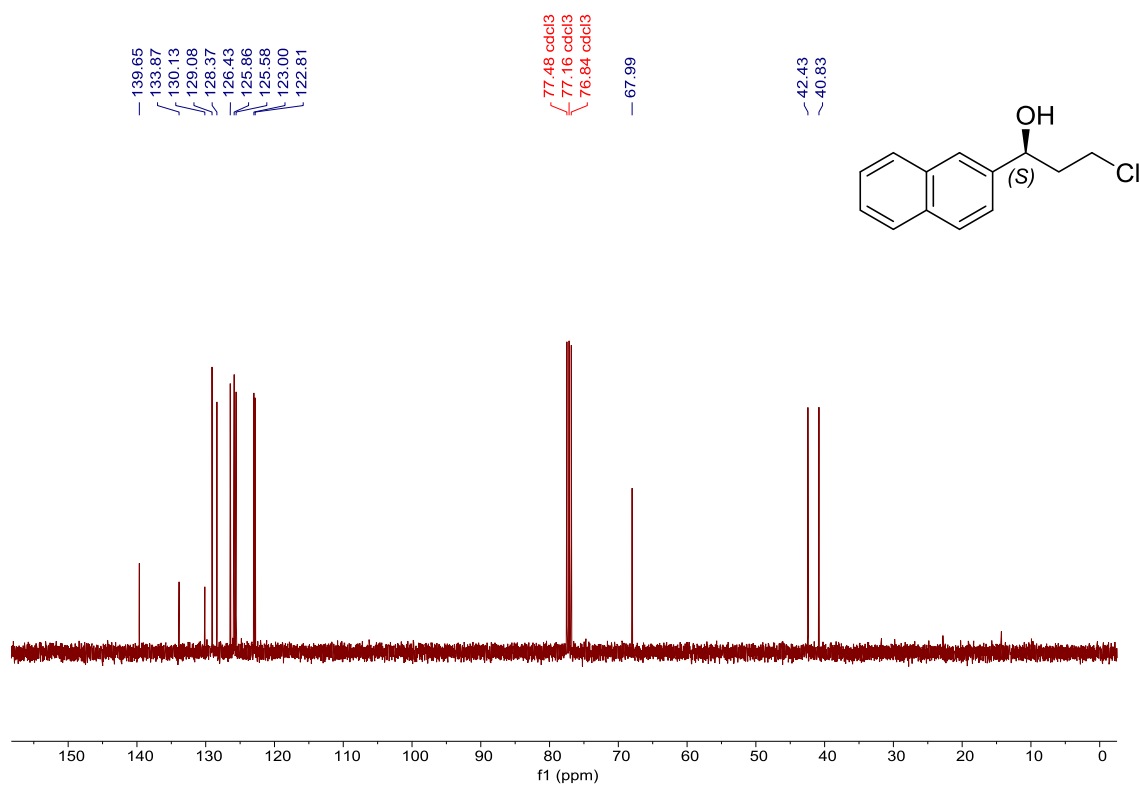



**(S)-4-chloro-2-phenylbutan-2-ol [(S)-17a]**

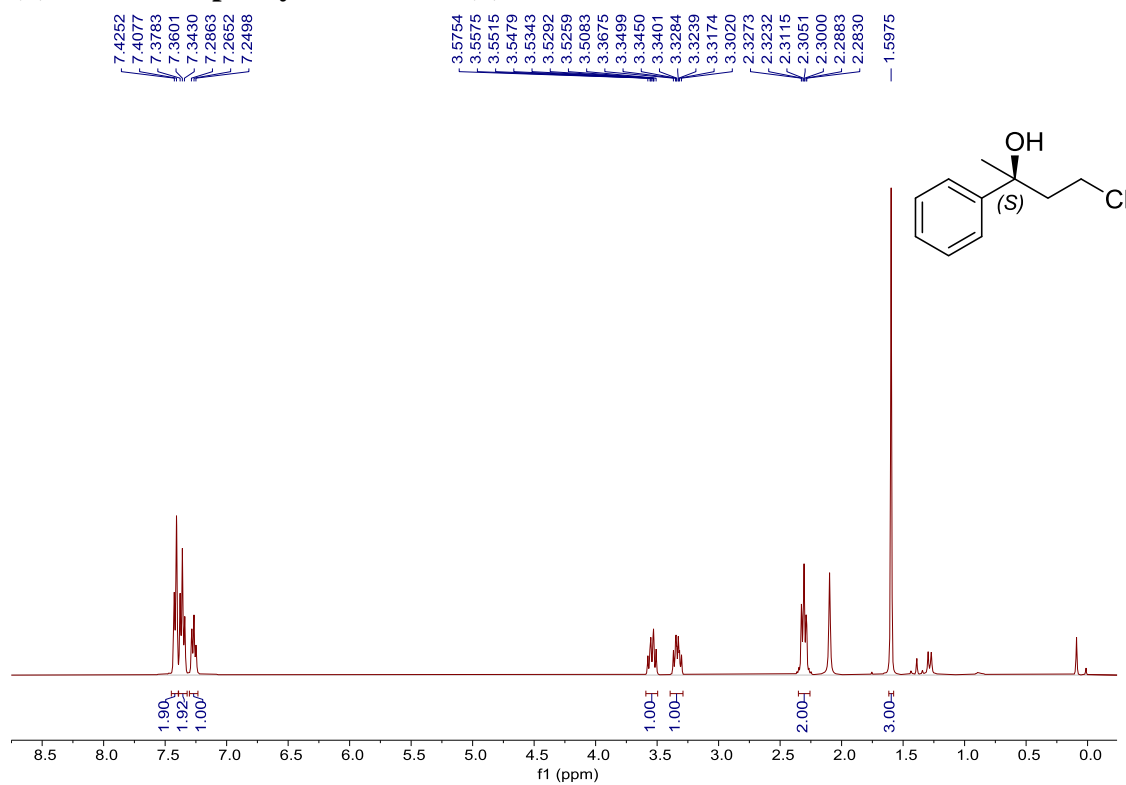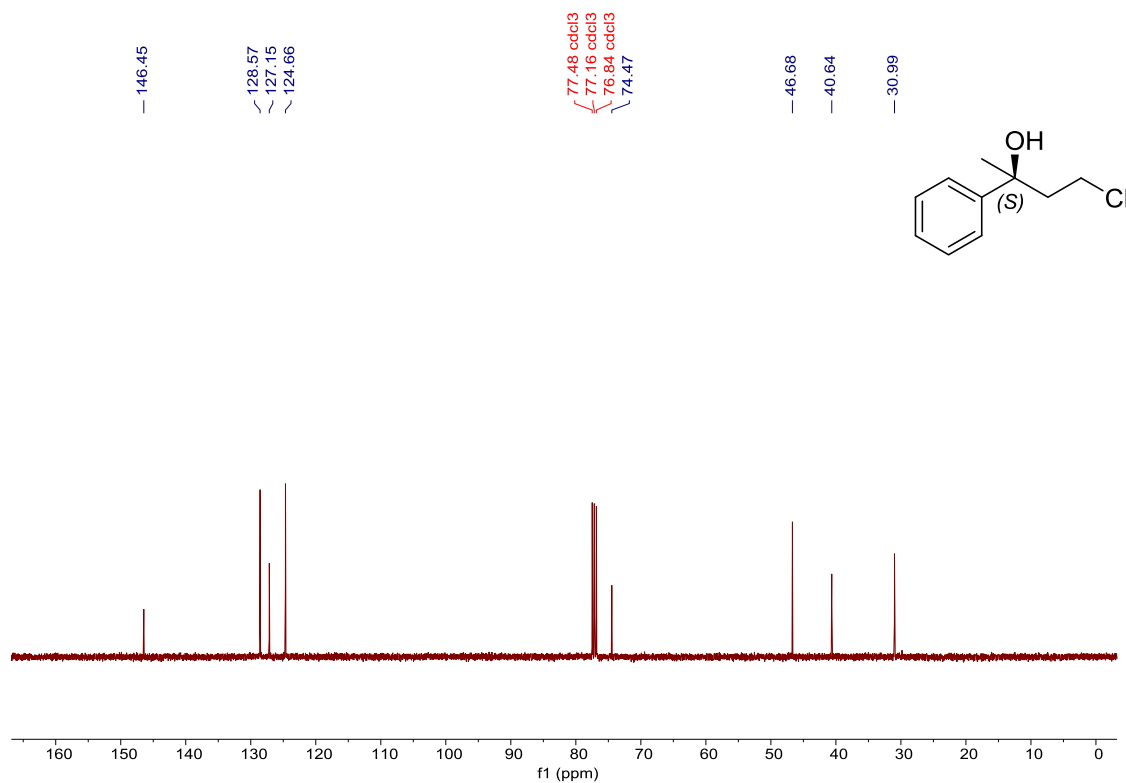

**(S)-1-(5-bromopyridin-3-yl)-3-chloropropan-1-ol [(S)-18a]**

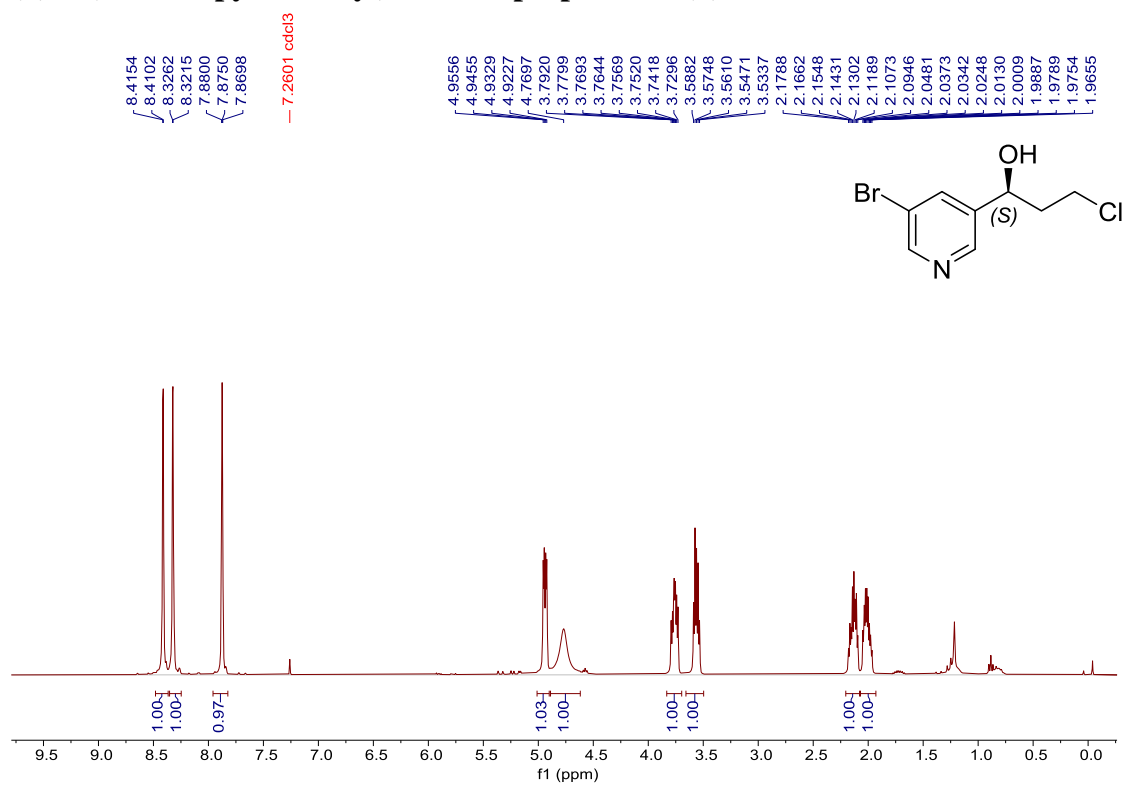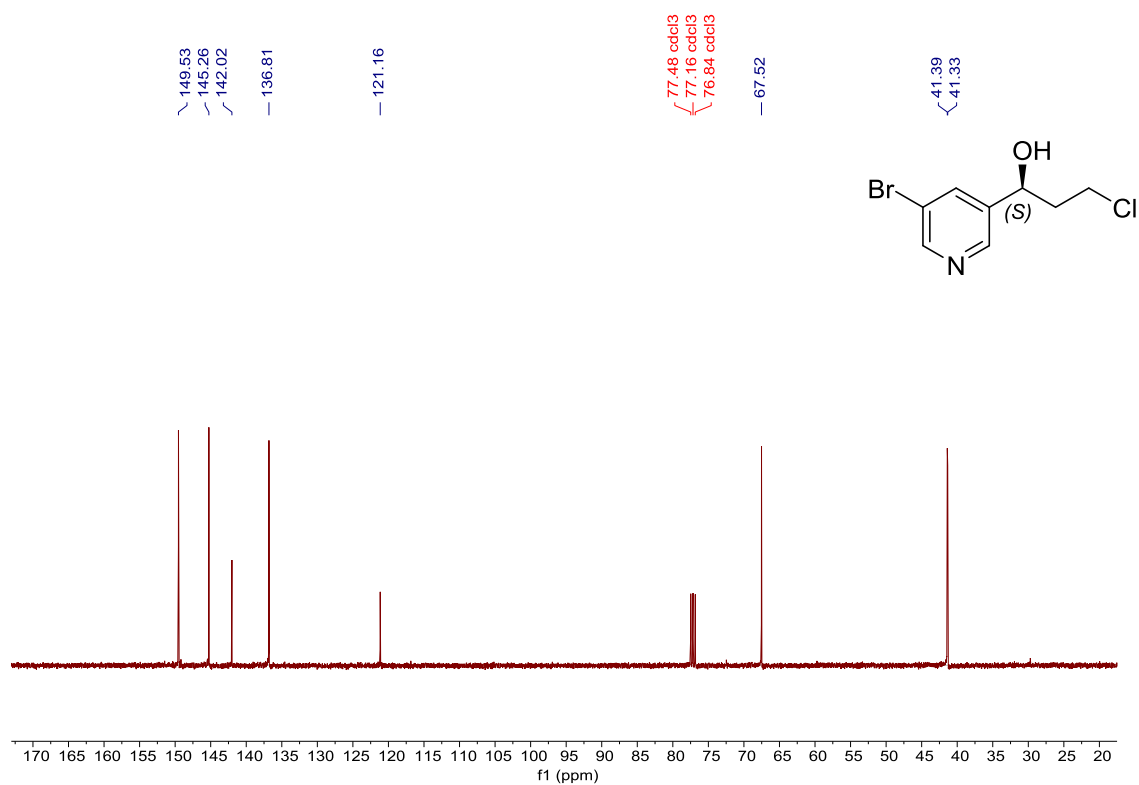

**(S)-3-chloro-1-(quinolin-3-yl)propan-1-ol [(S)-19a]**

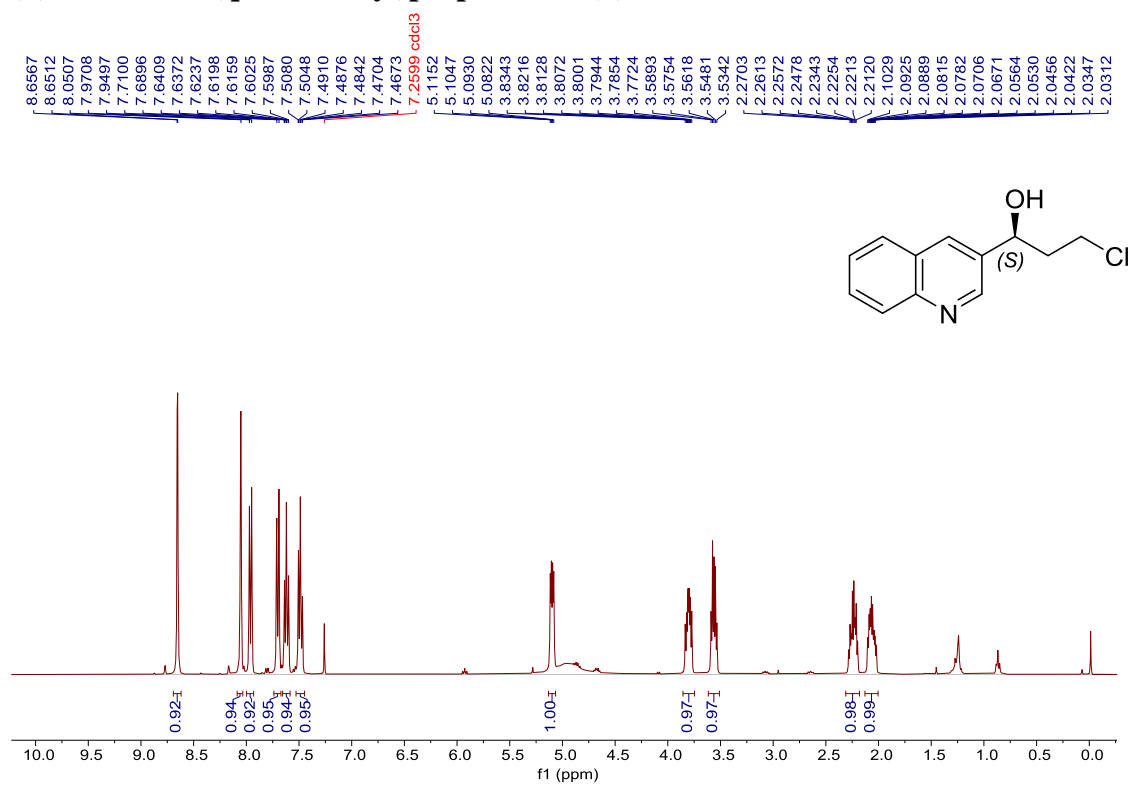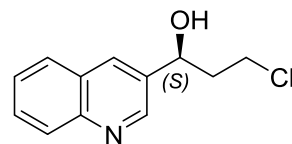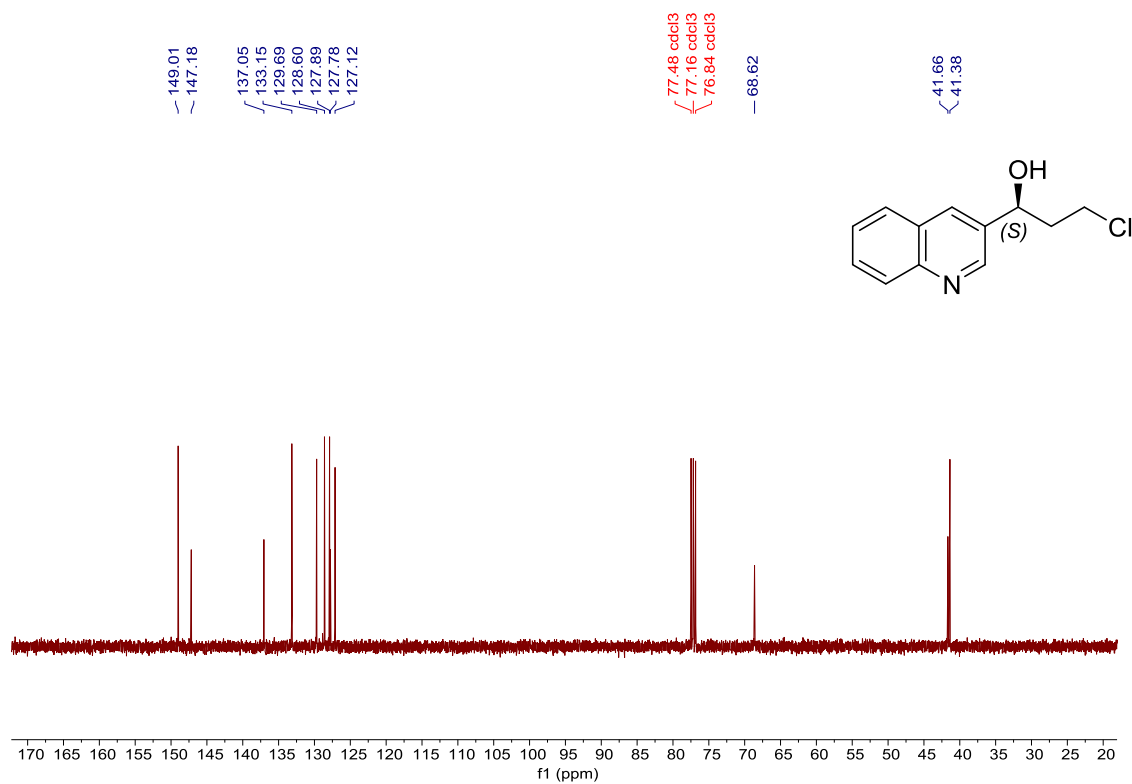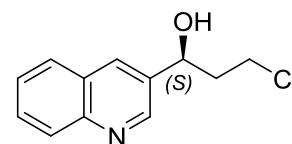

**(S)-3-chloro-1-(thiophen-2-yl)propan-1-ol [(S)-20a]**

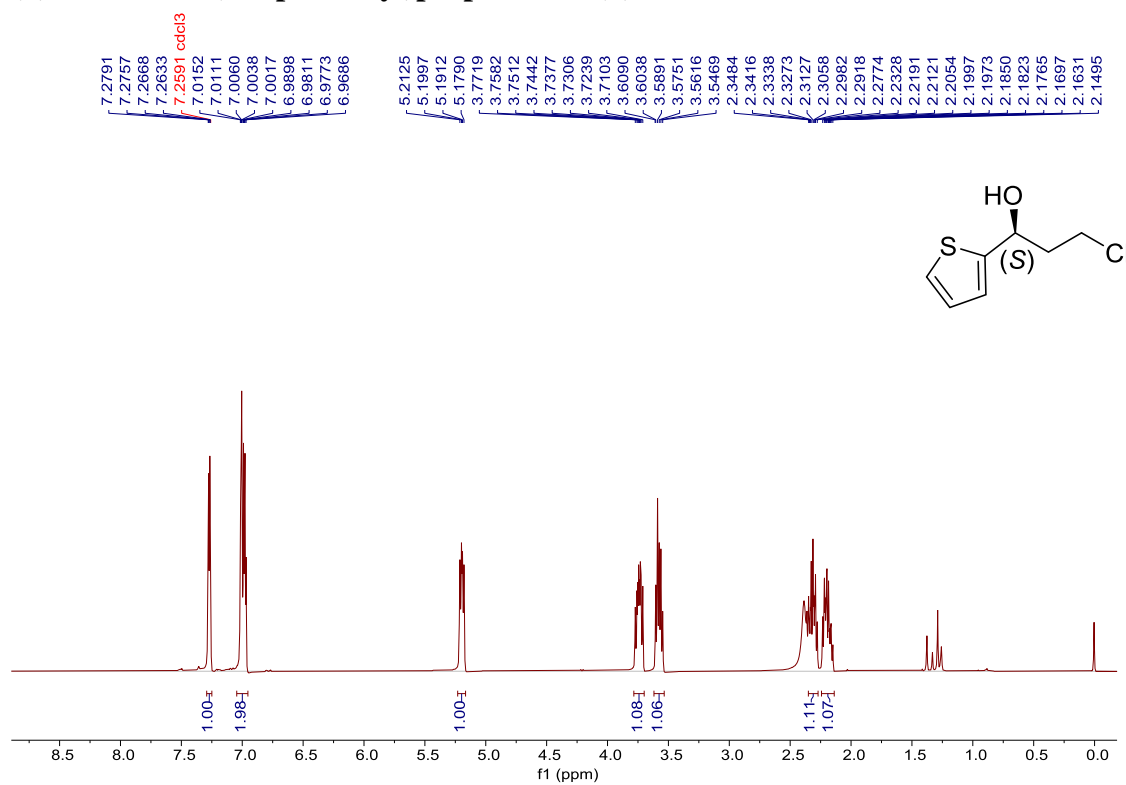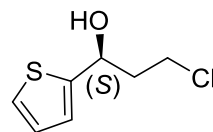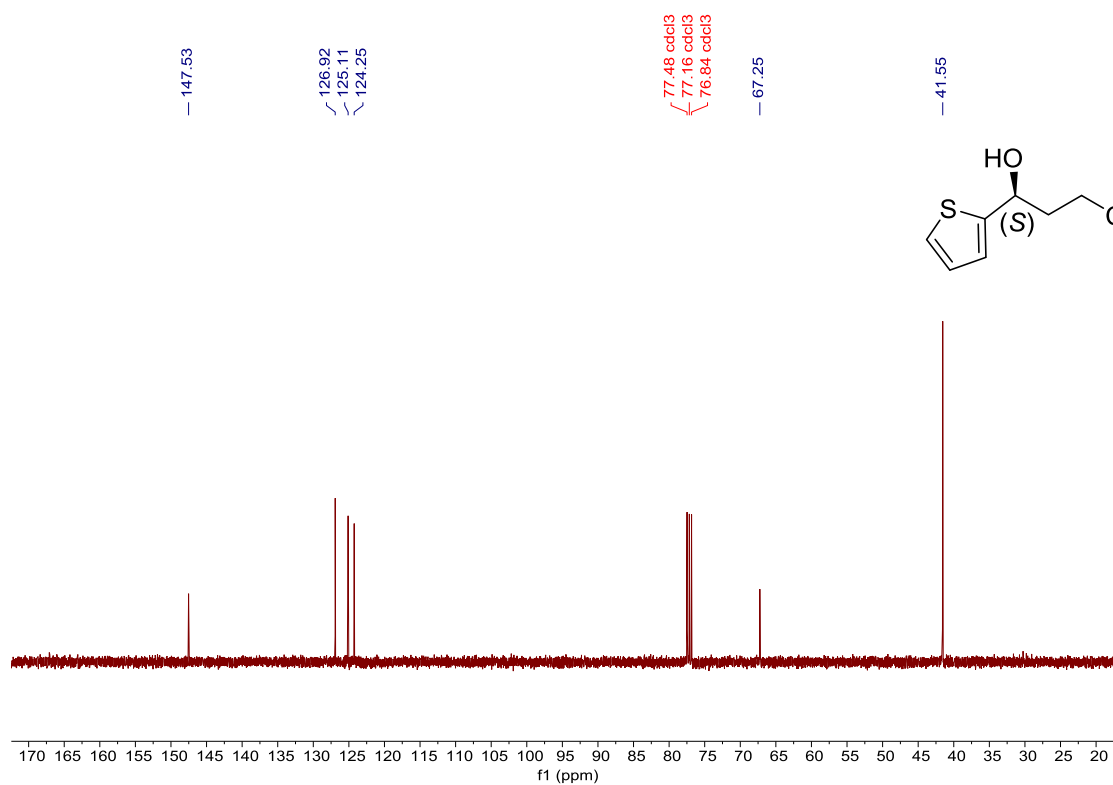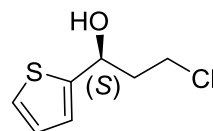

**(S)-3-chloro-1-cyclohexylpropan-1-ol [(S)-21a]**

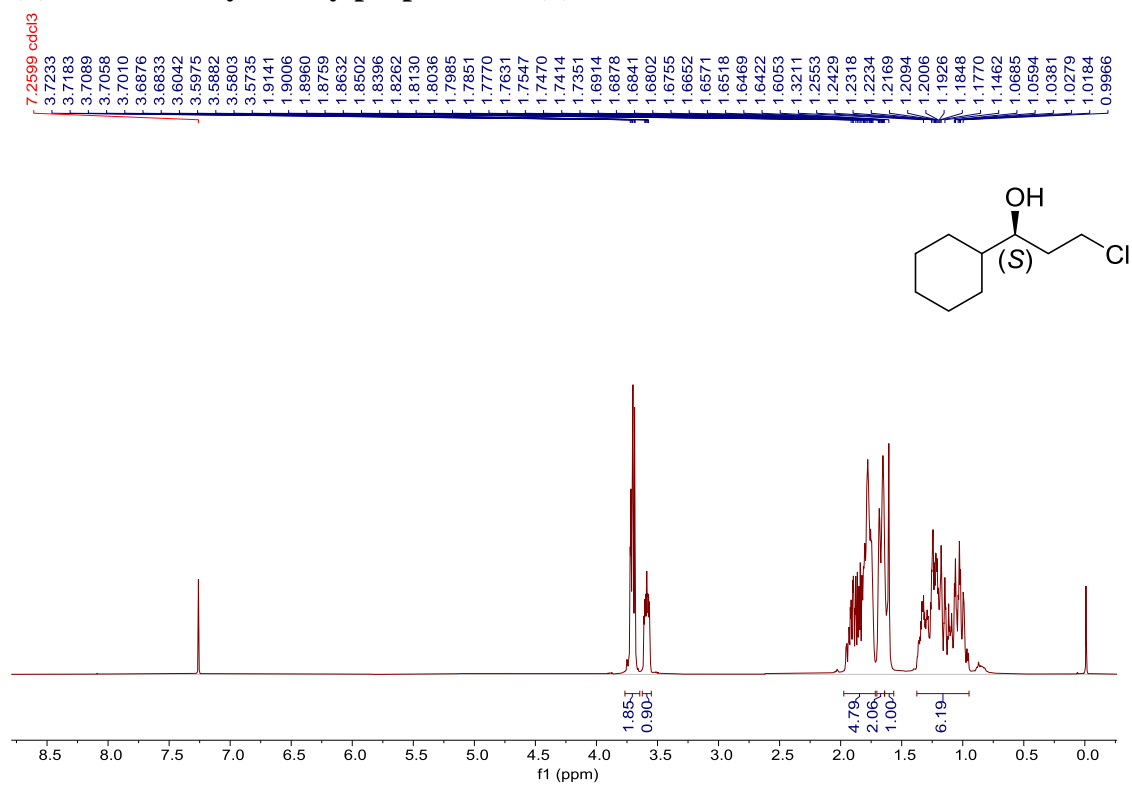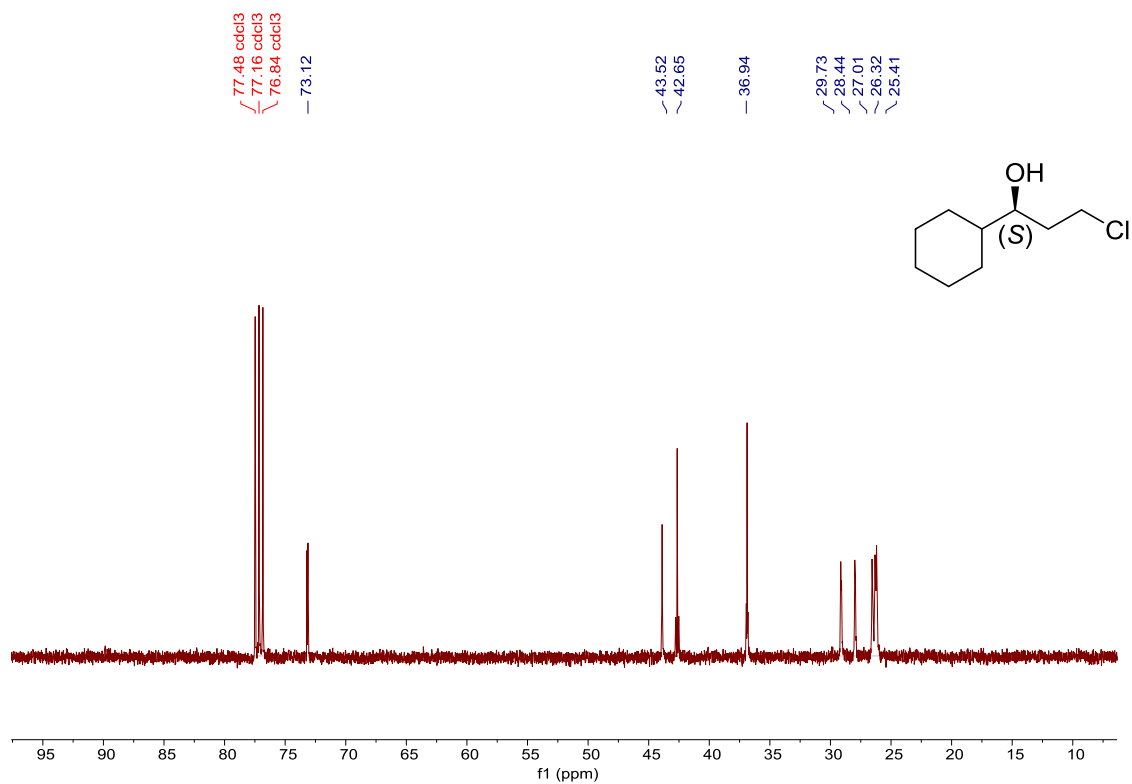

**(S)-3-bromo-1-phenylpropan-1-ol [(S)-22a]**

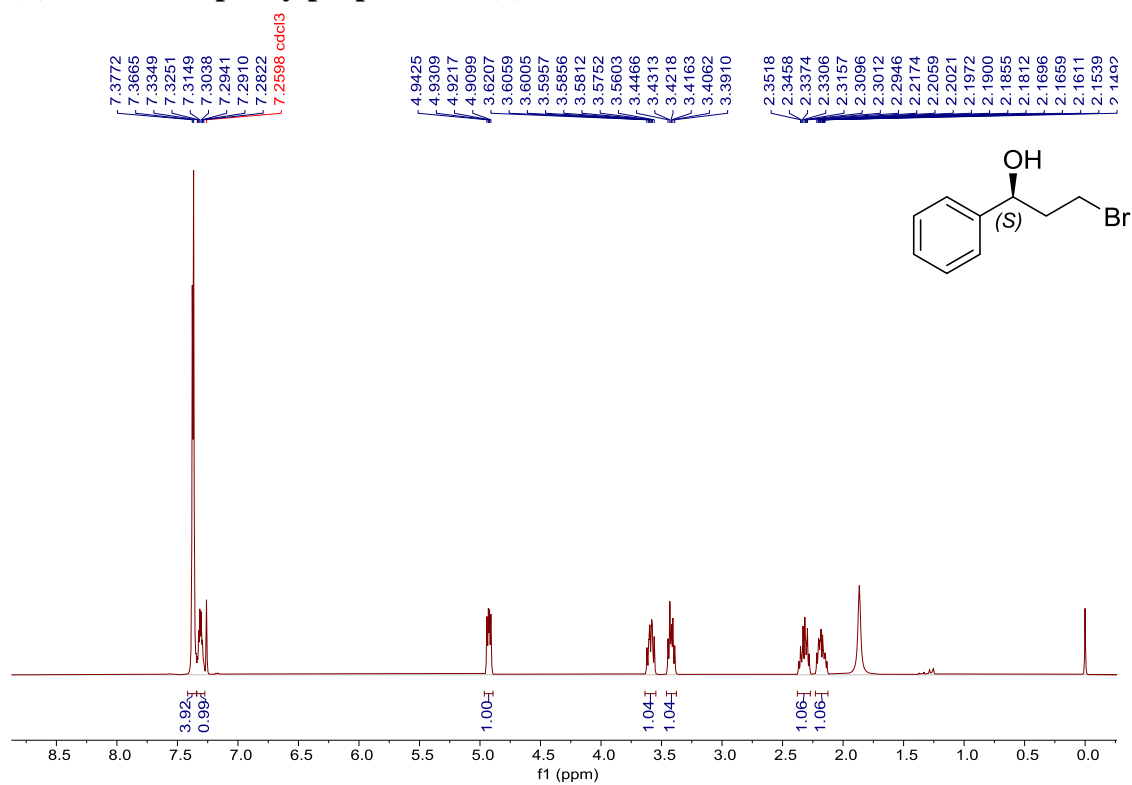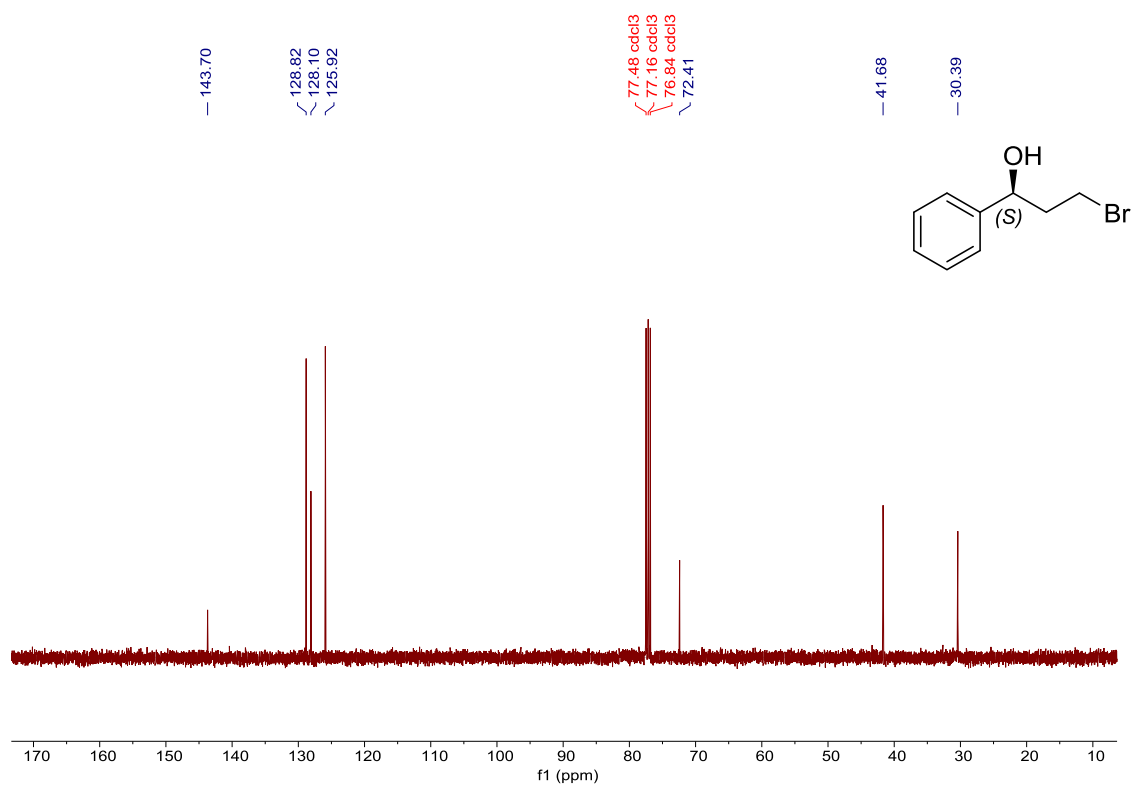

**(S)-3-iodo-1-phenylpropan-1-ol [(S)-23a]**

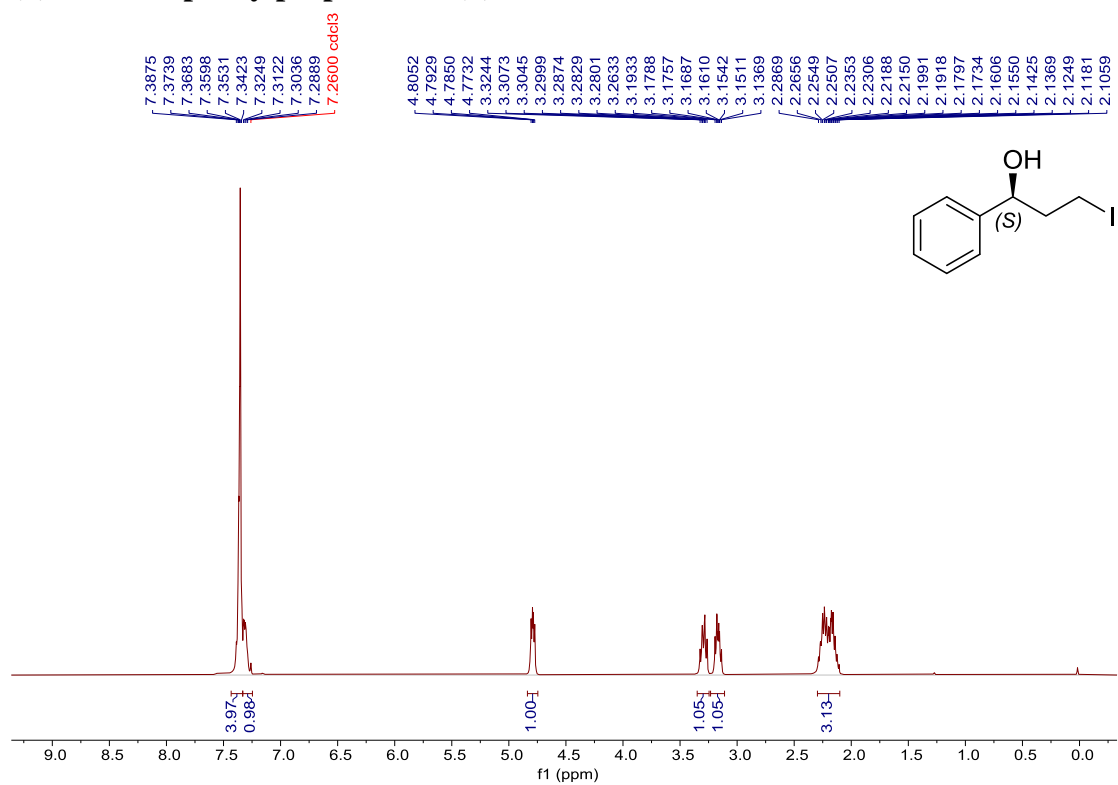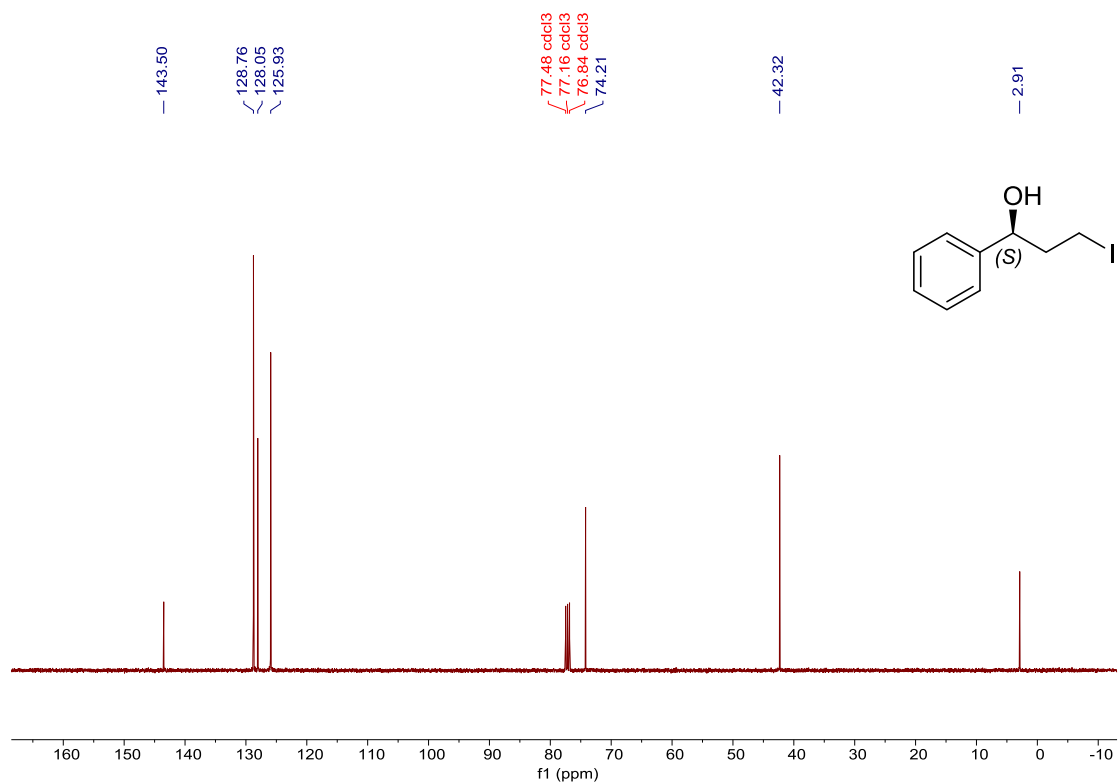

**(R)-2-phenyloxetane [(R)-1b] from 1a**

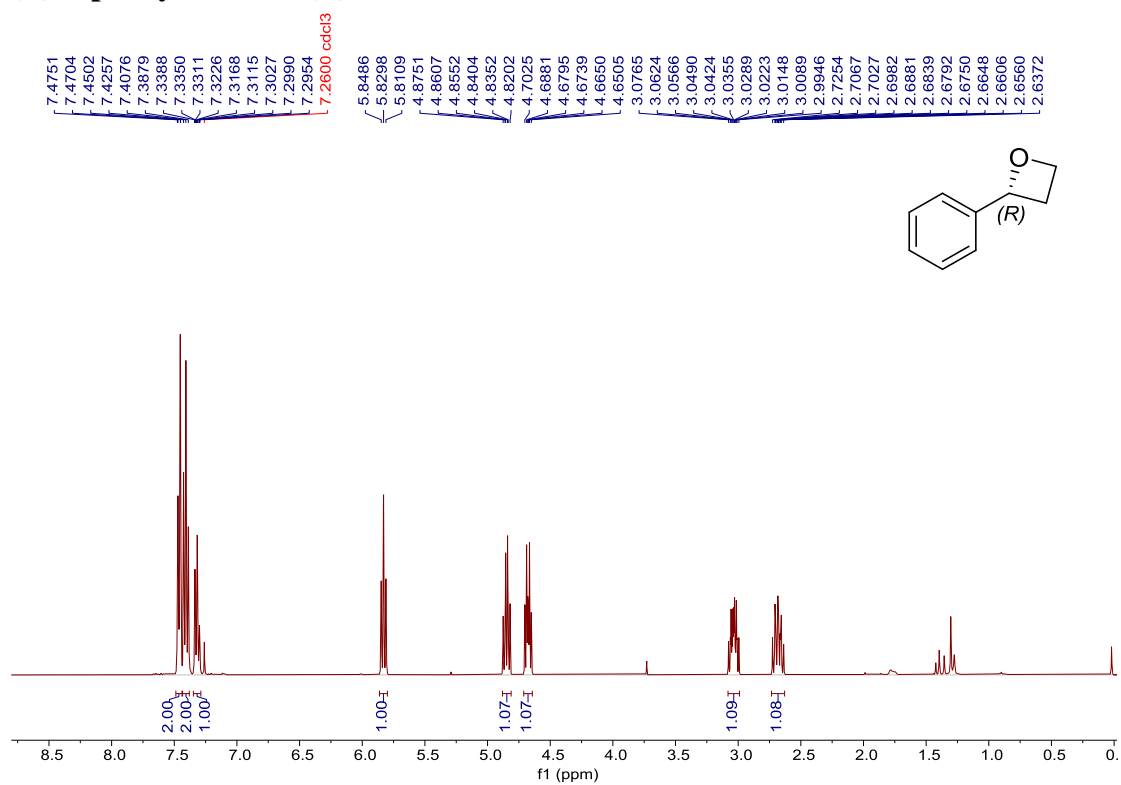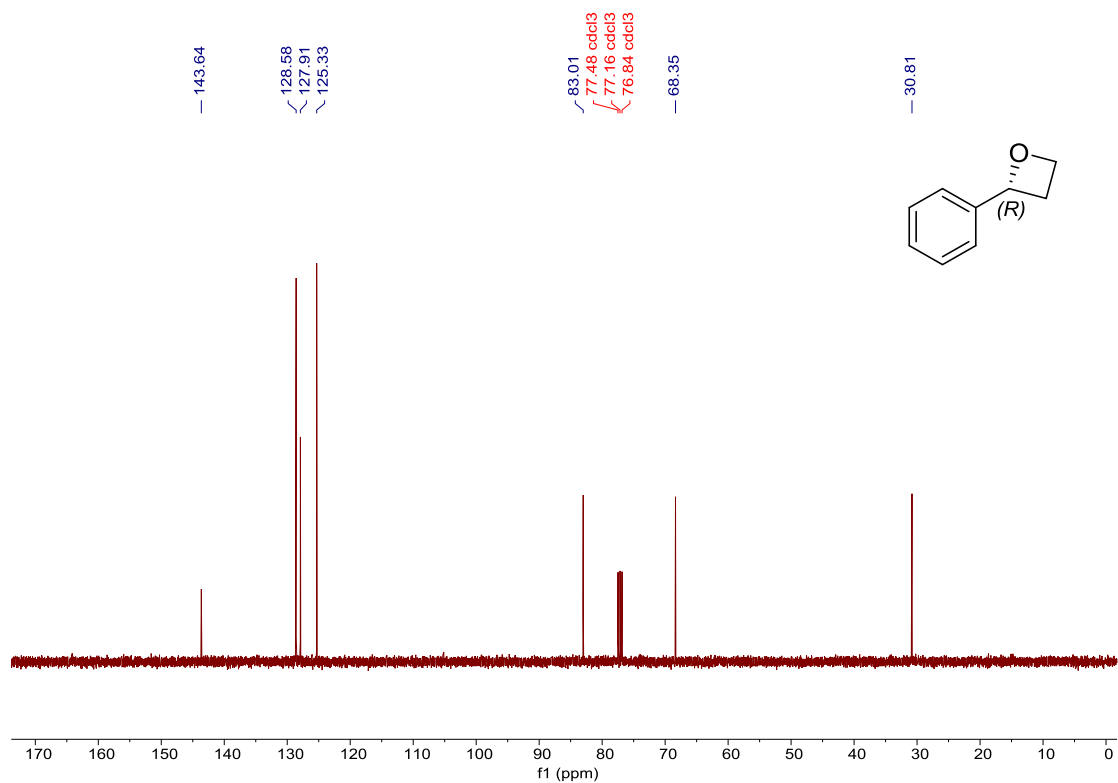



**(R)-2-phenyloxetane [(R)-1b] from 22a**

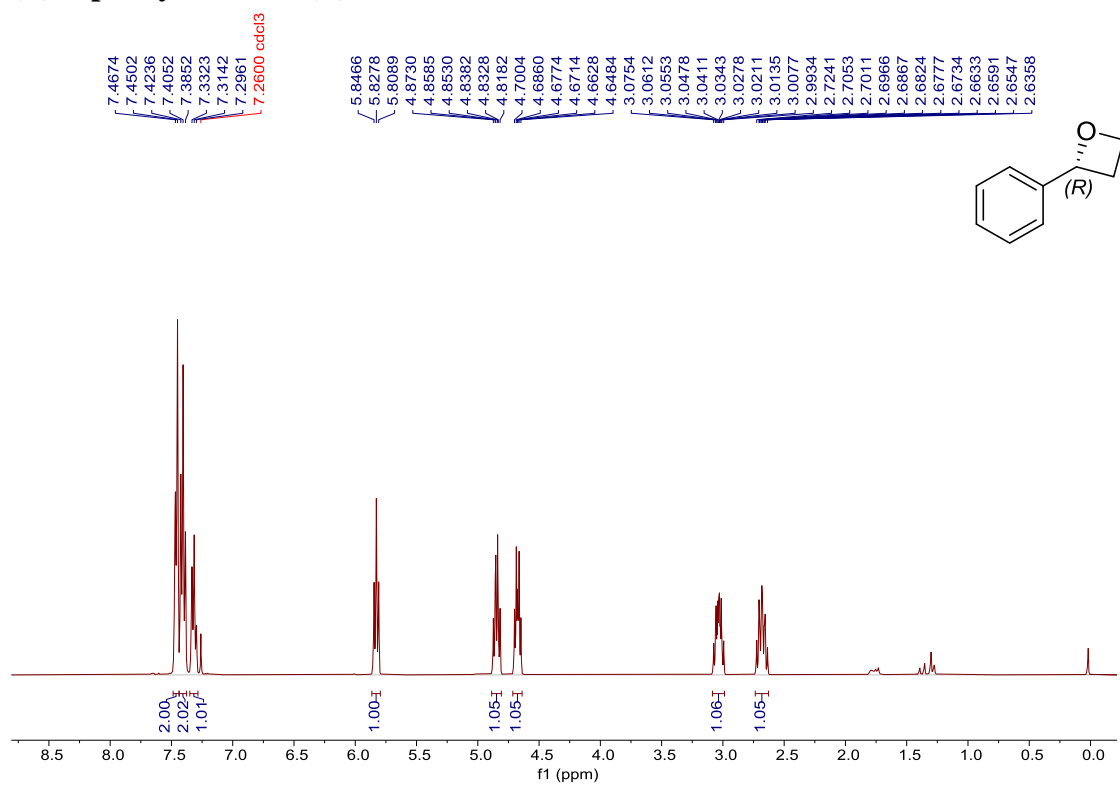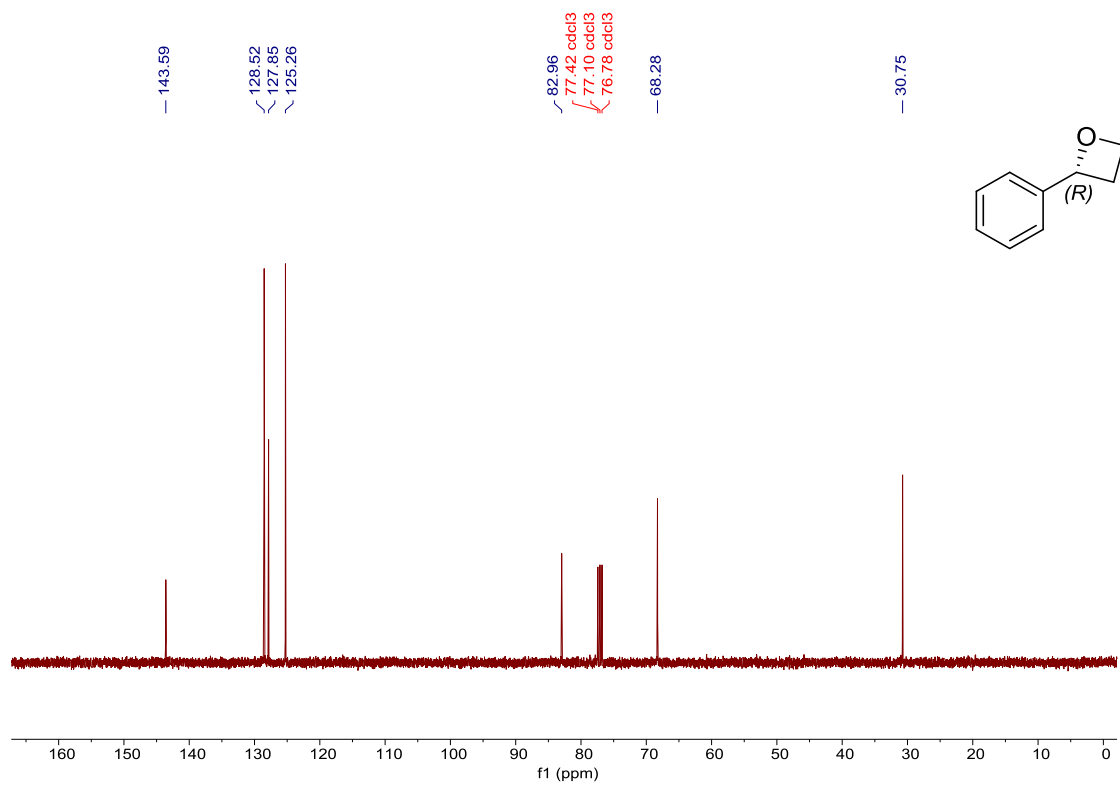

**(R)-2-phenyloxetane [(R)-1b] from 23a**

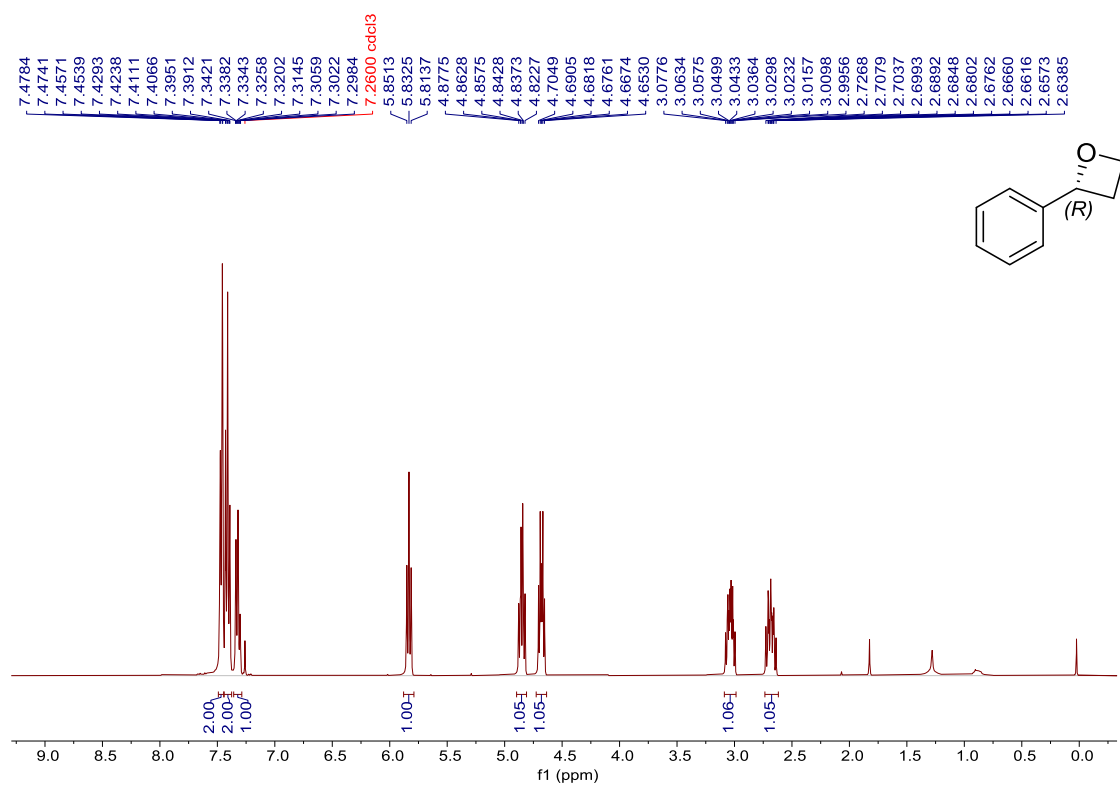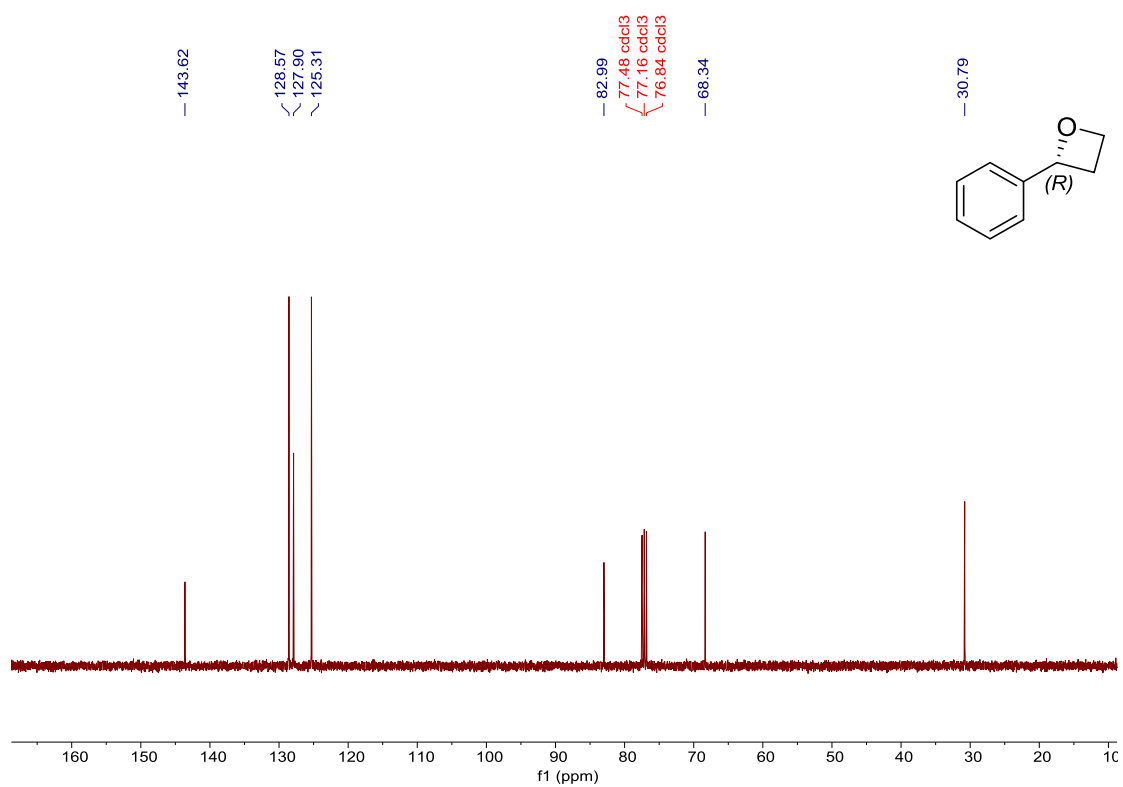

**(R)-2-(2-fluorophenyl) oxetane [(R)-2b]**

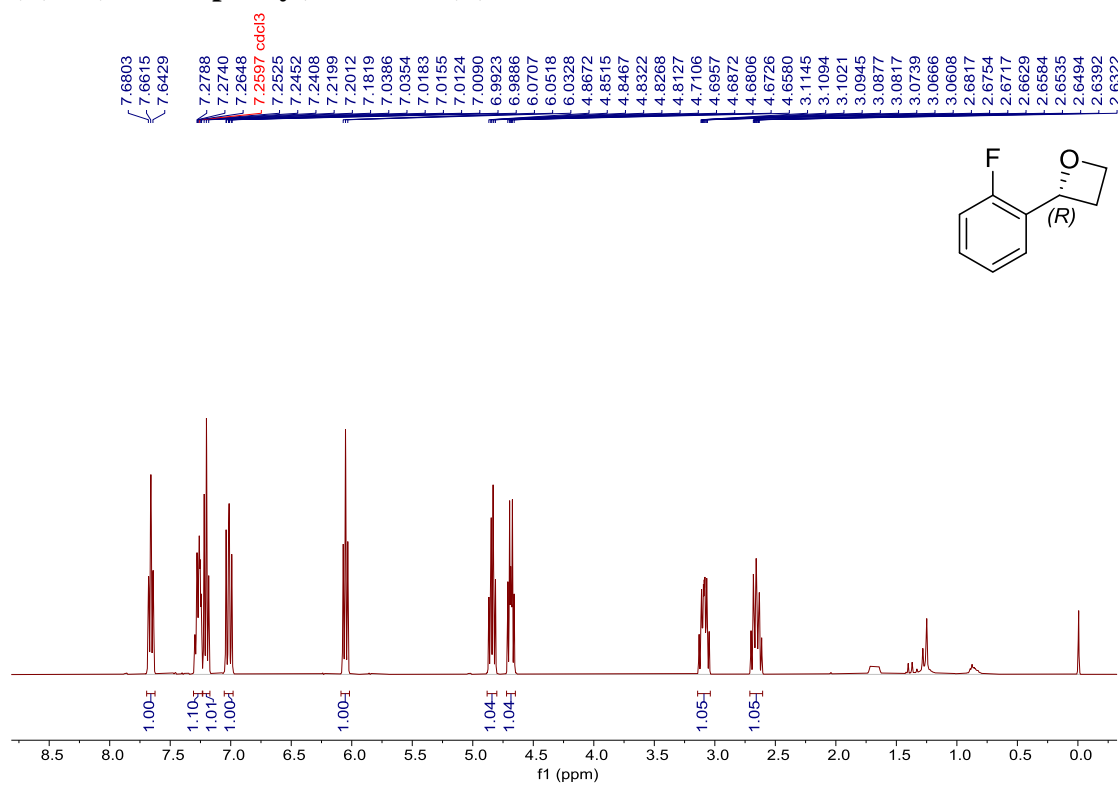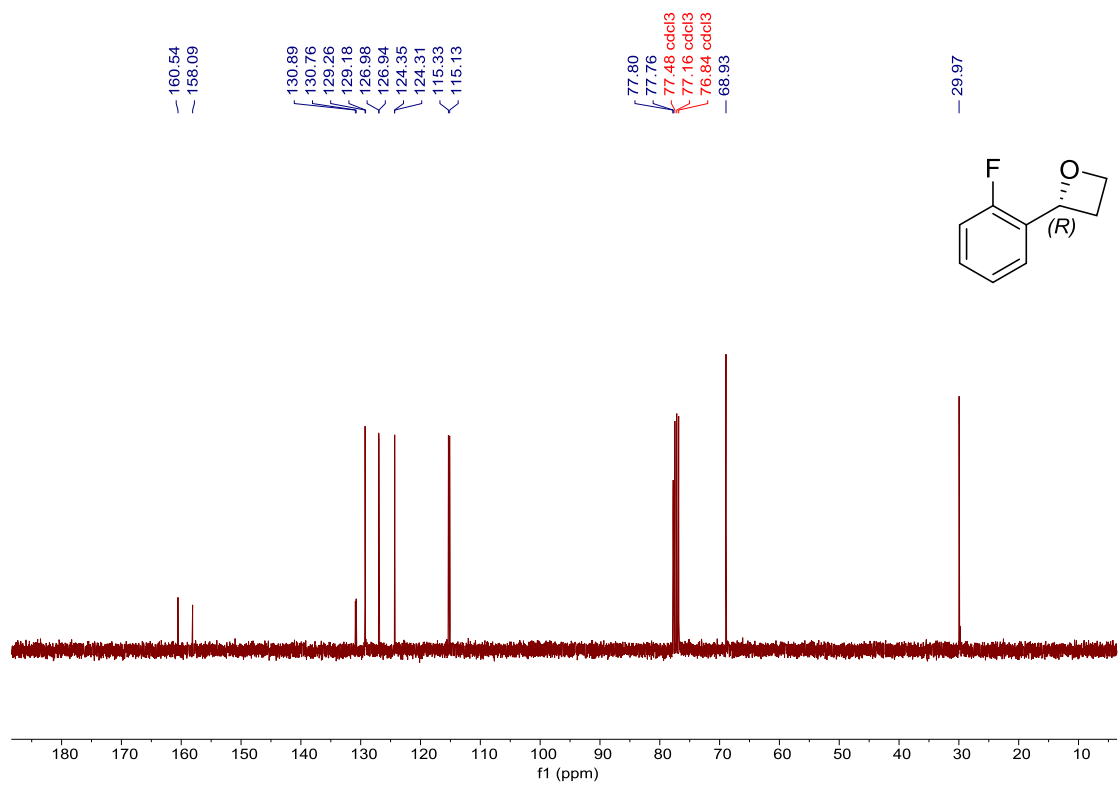

**(R)-2-(2-chlorophenyl) oxetane[(R)-3b]**

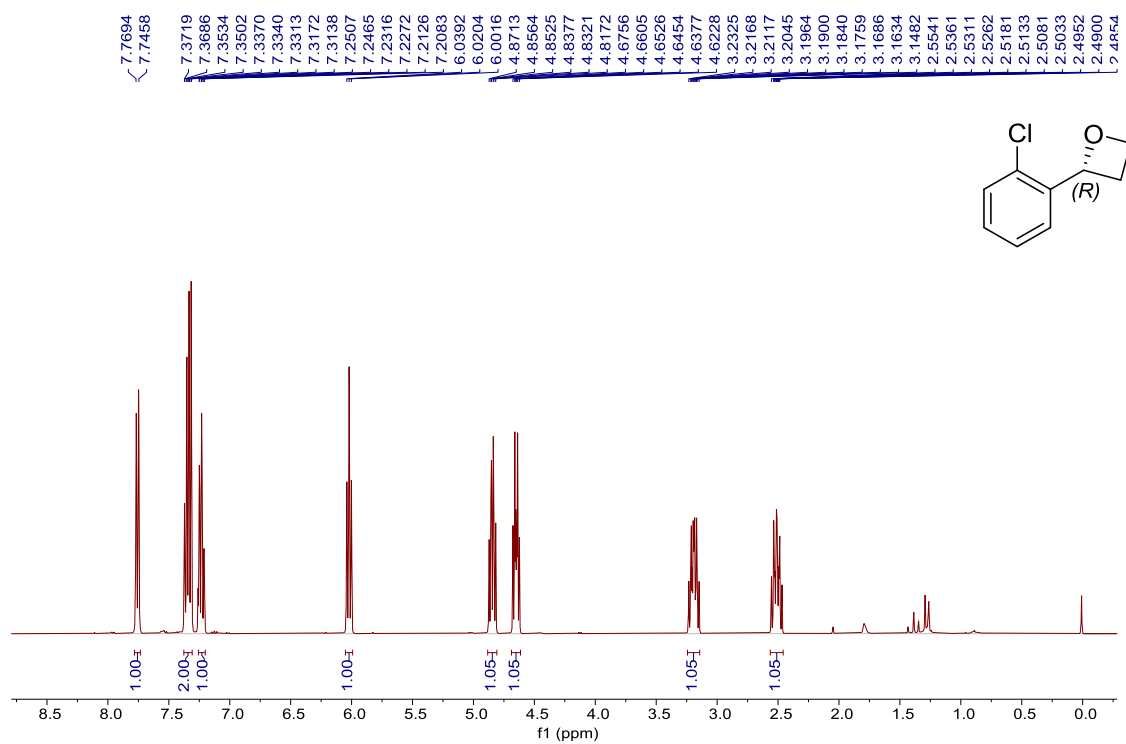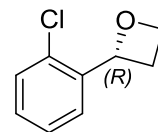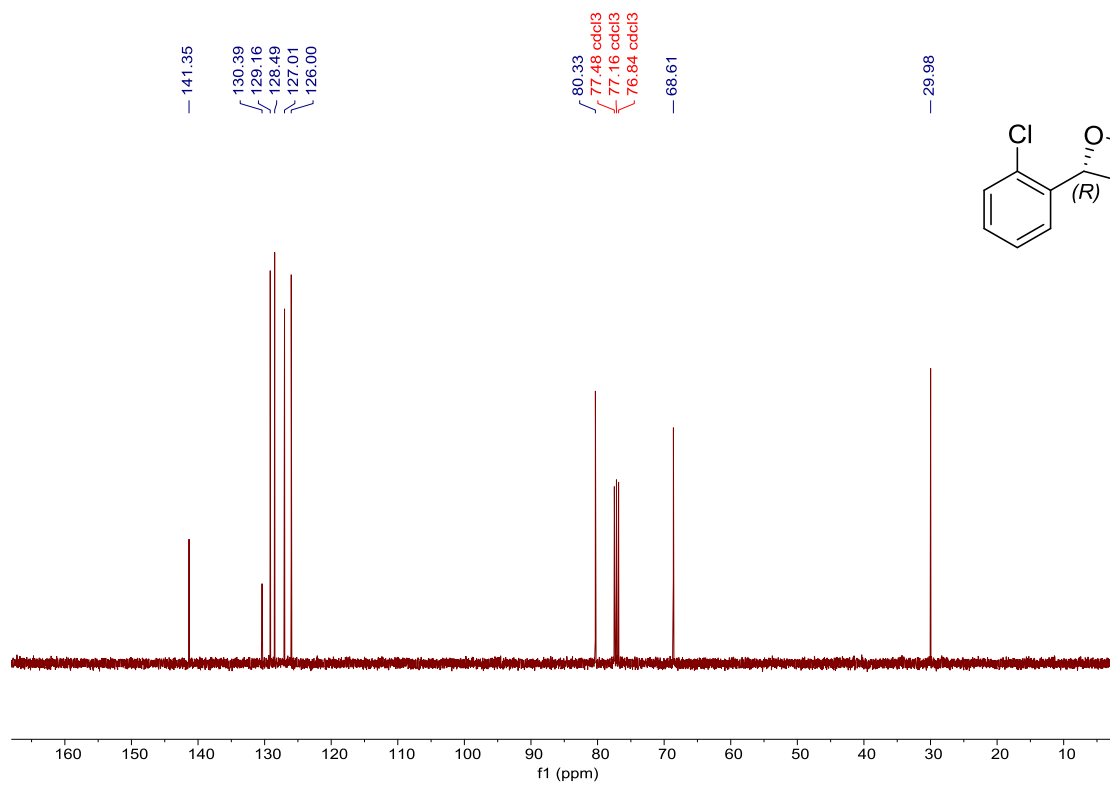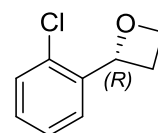

**(R)-2-(2-bromophenyl) oxetane [(R)-4b]**

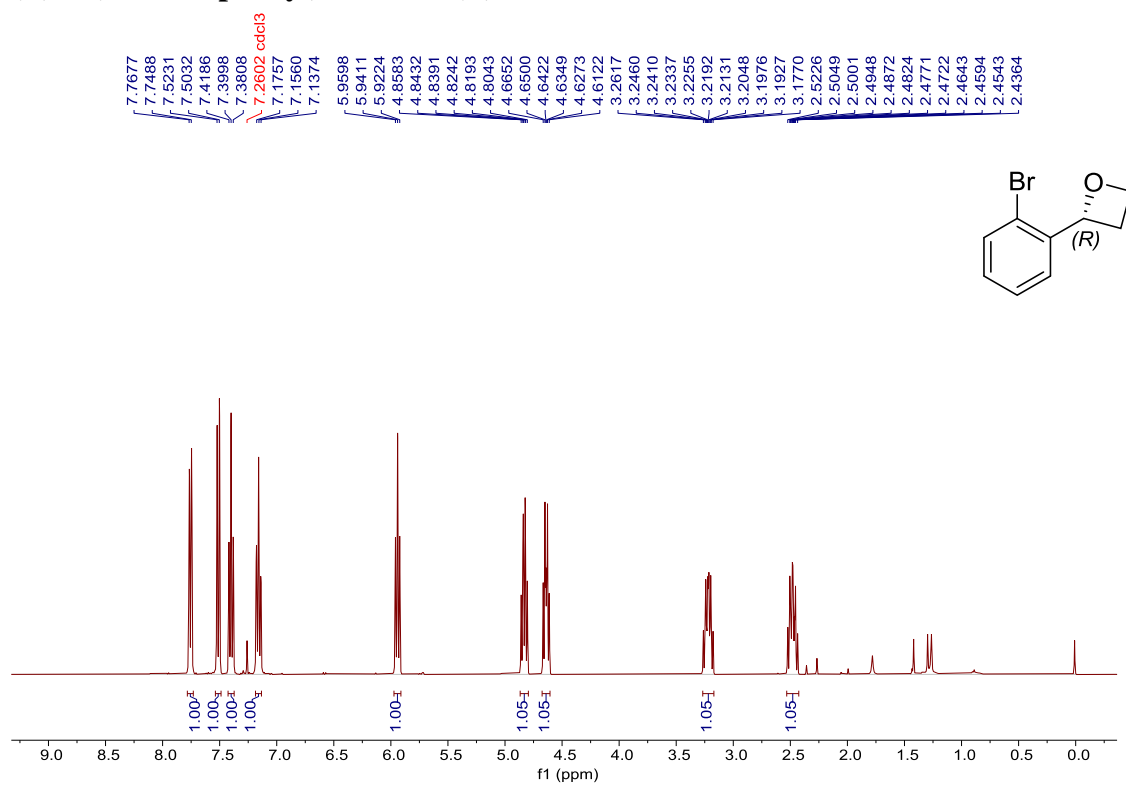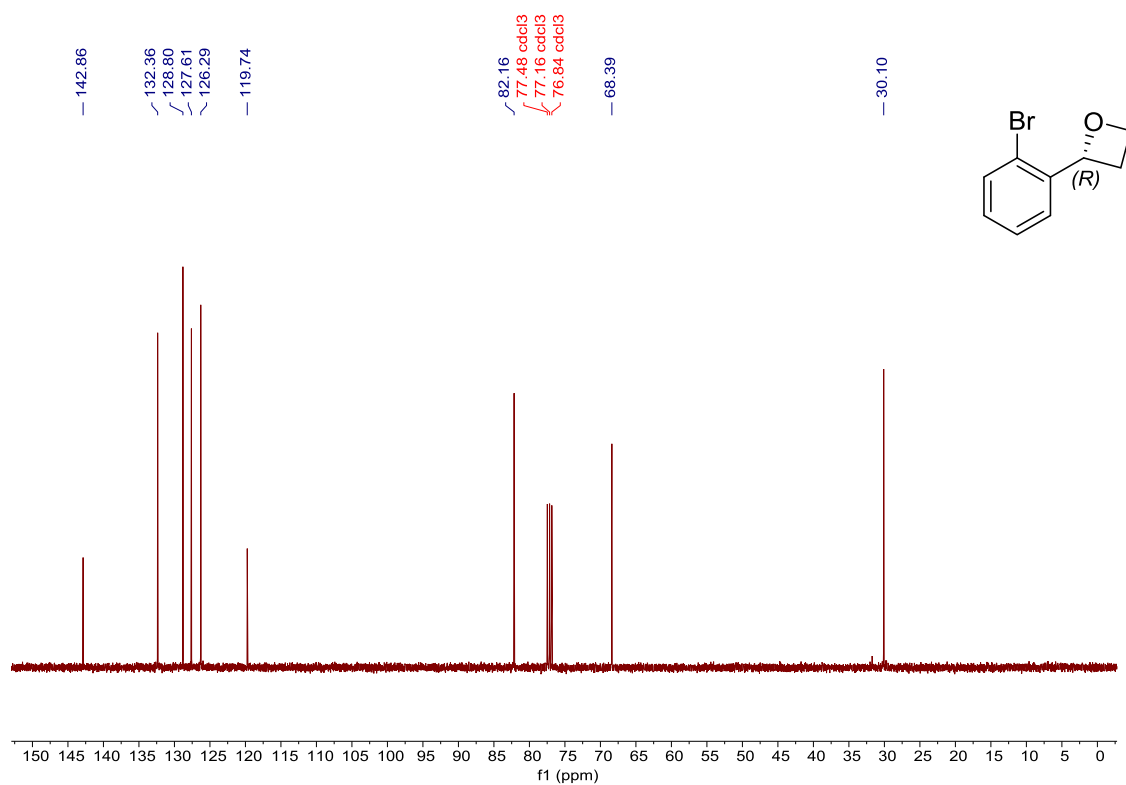

**(R)-2-(o-tolyl) oxetane [(R)-5b]**

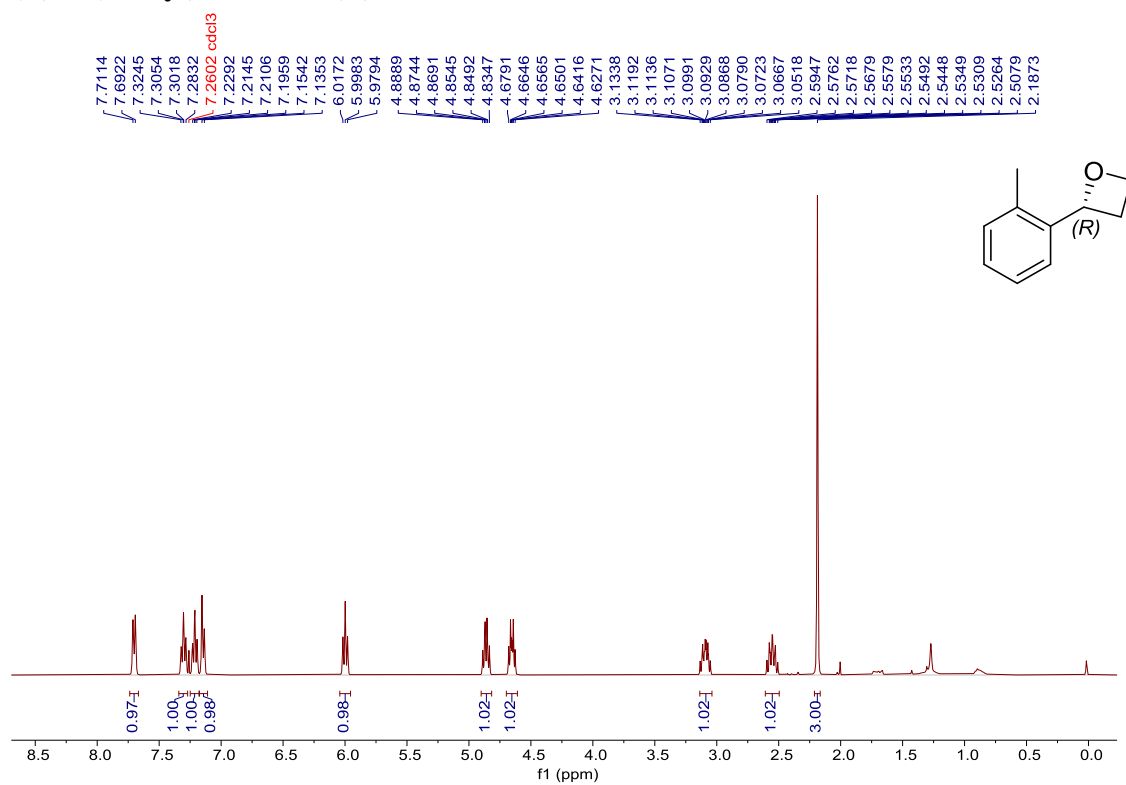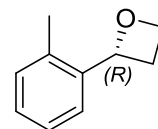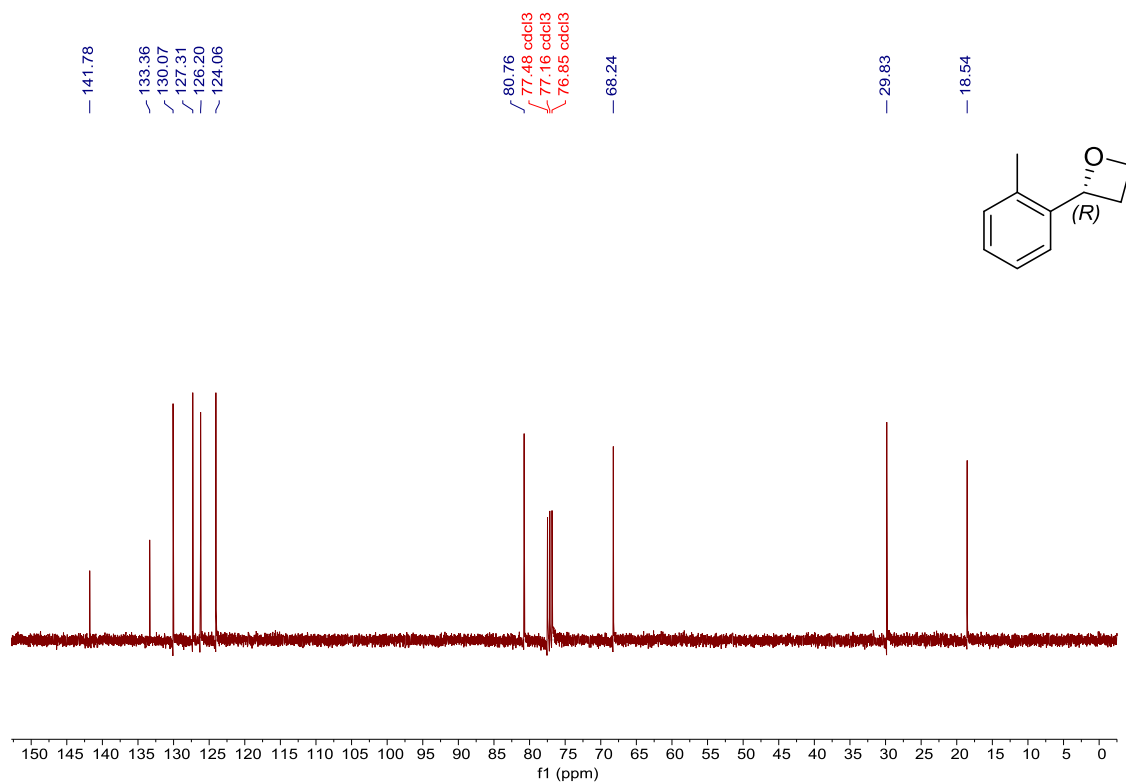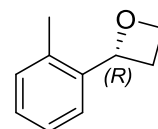

**(R)-2-(3-fluorophenyl) oxetane [(R)-6b]**

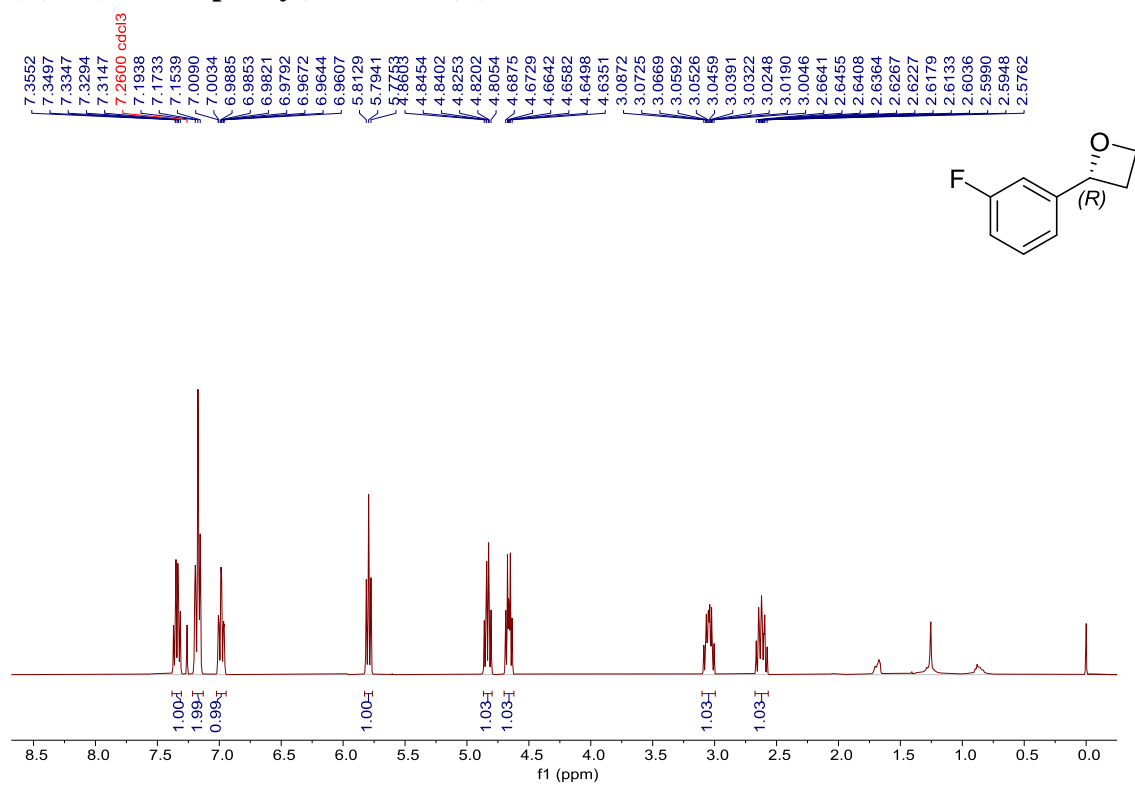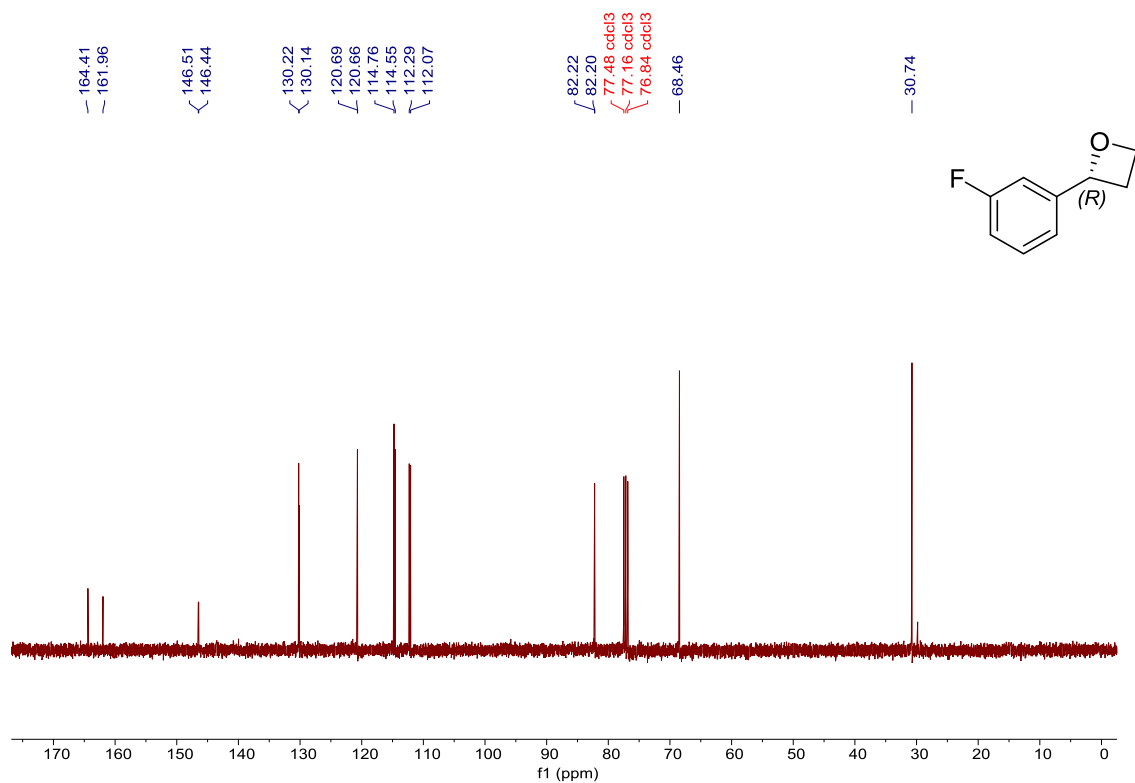

**(R)-2-(3-chlorophenyl) oxetane [(R)-7b]**

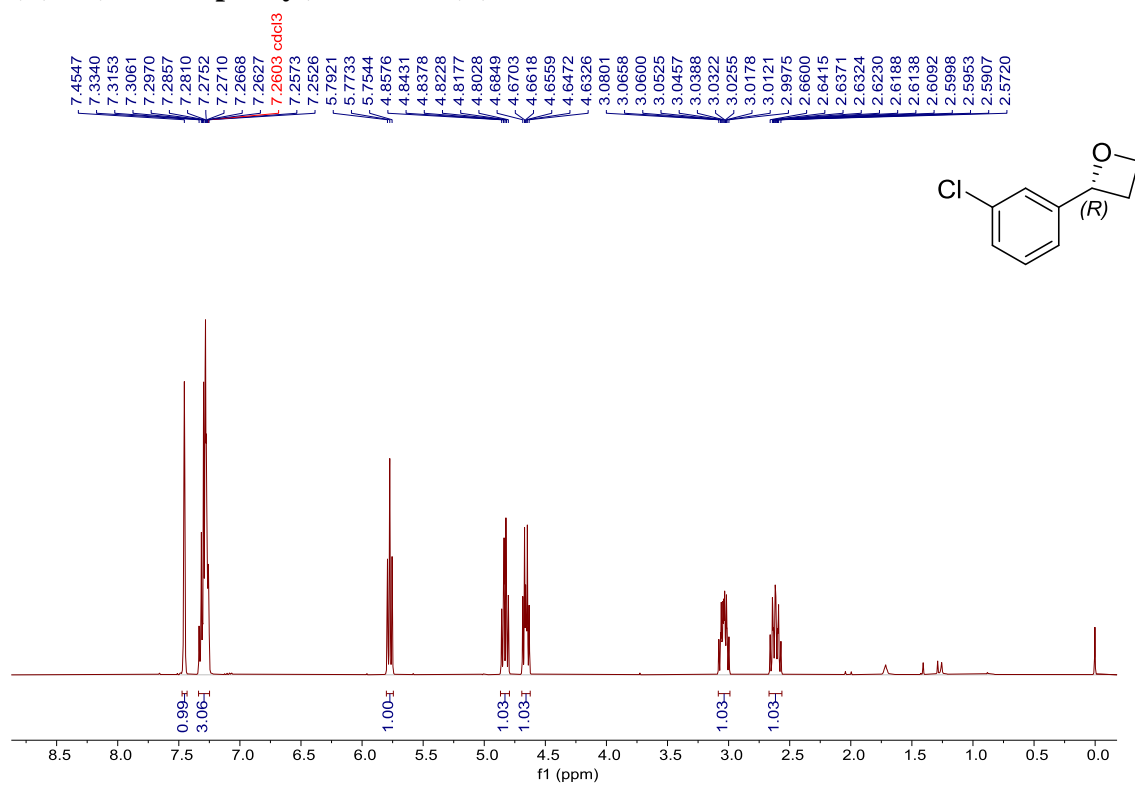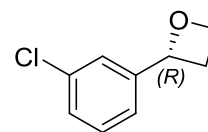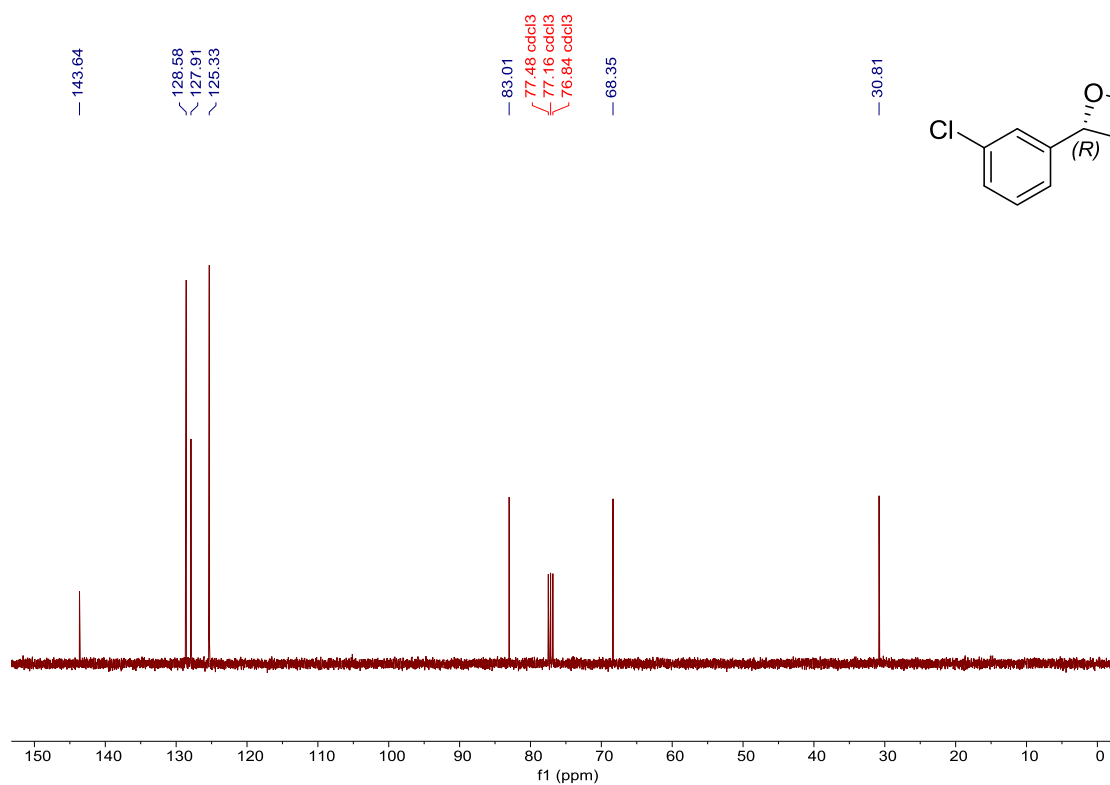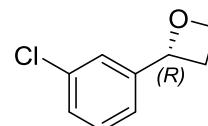



**(R)-2-(3-bromophenyl)oxetane [(R)-8b]**

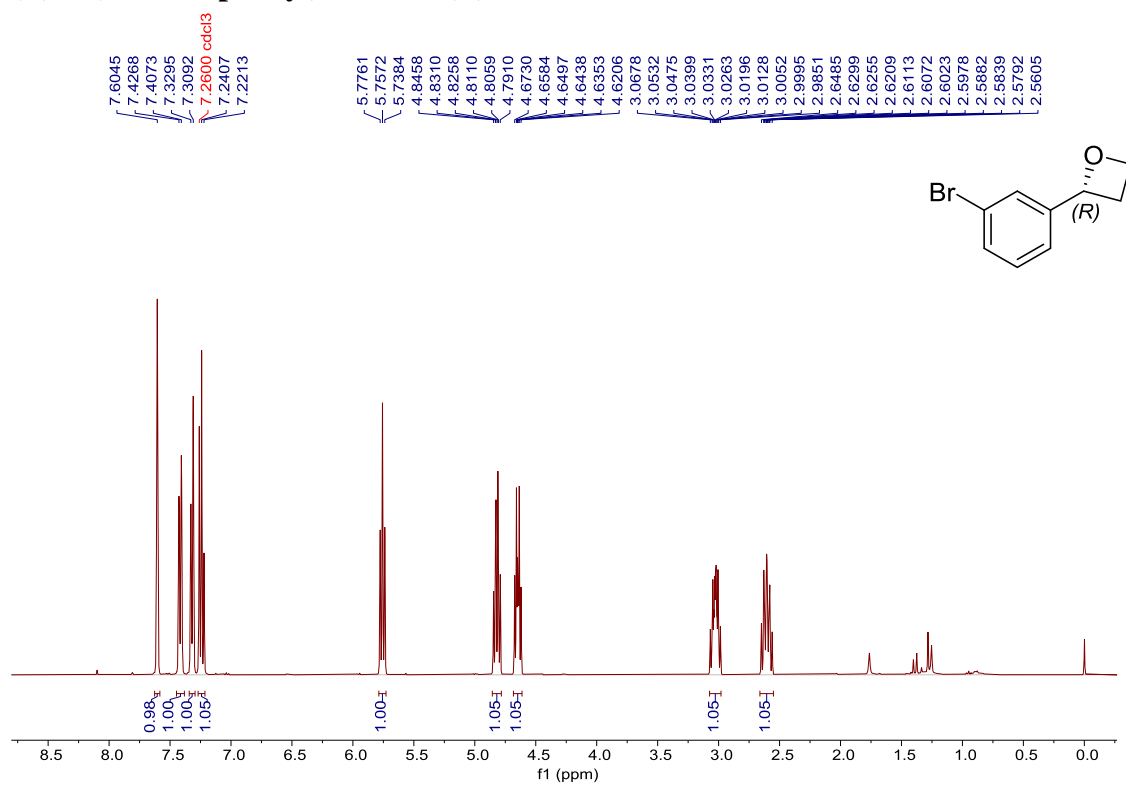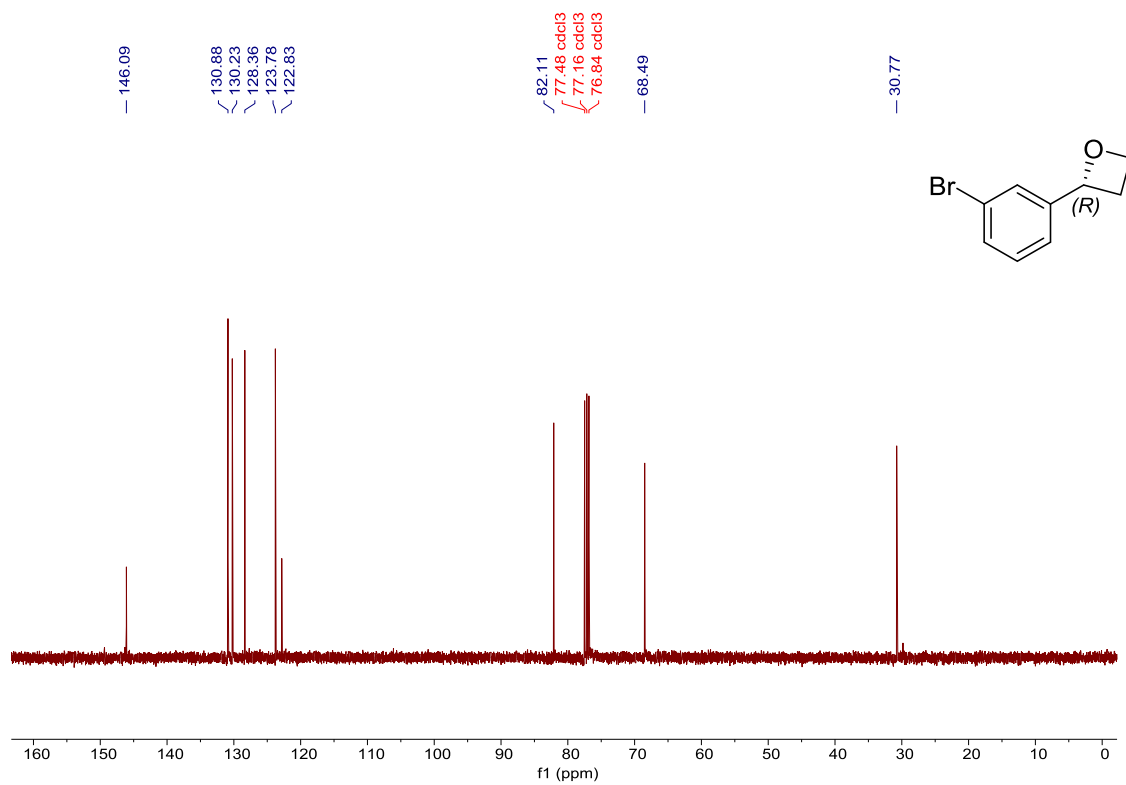

**(R)-2-(m-tolyl)oxetane [(R)-9b]**

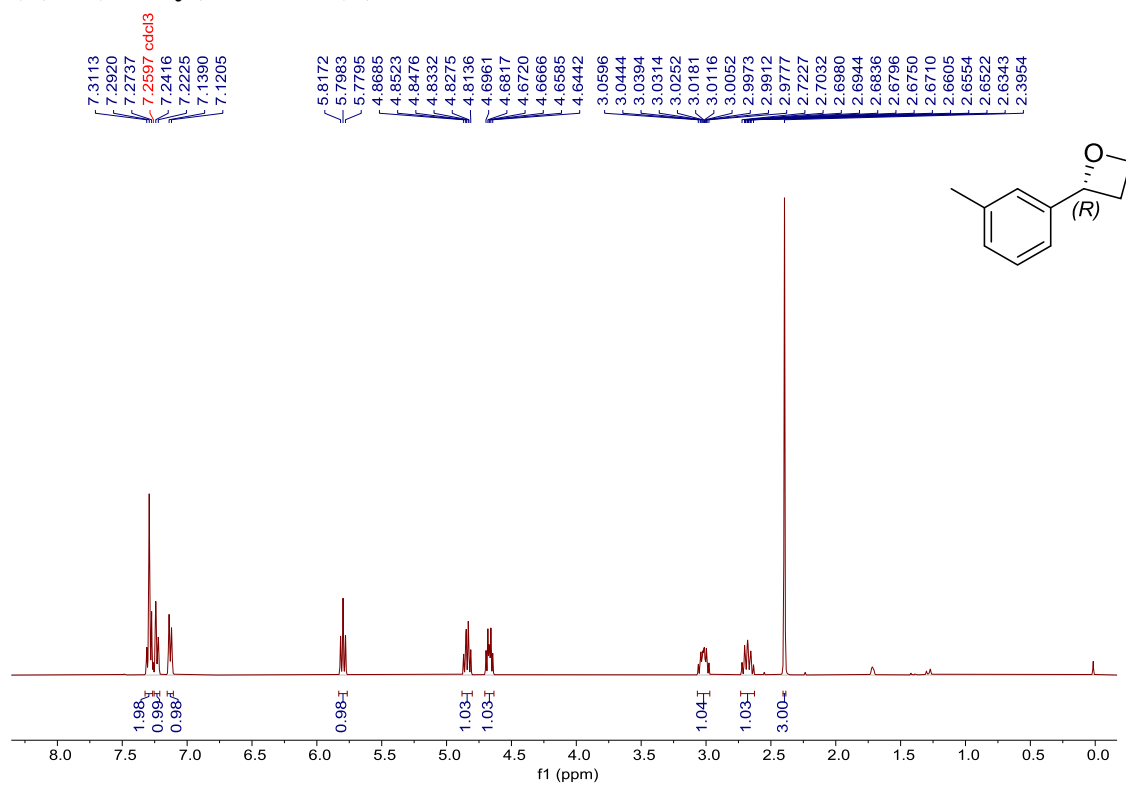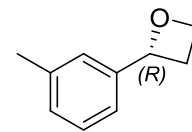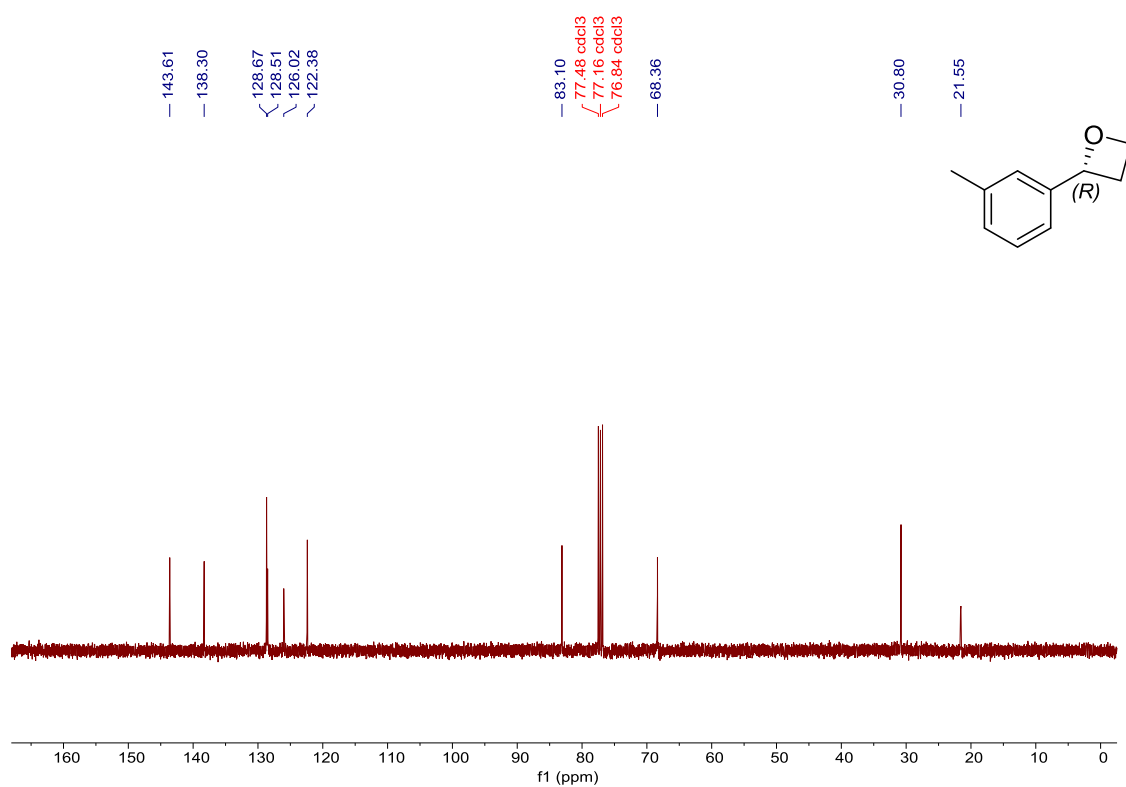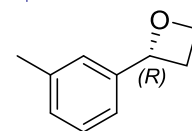

**(R)-2-(3-methoxyphenyl)oxetane [(R)-10b]**

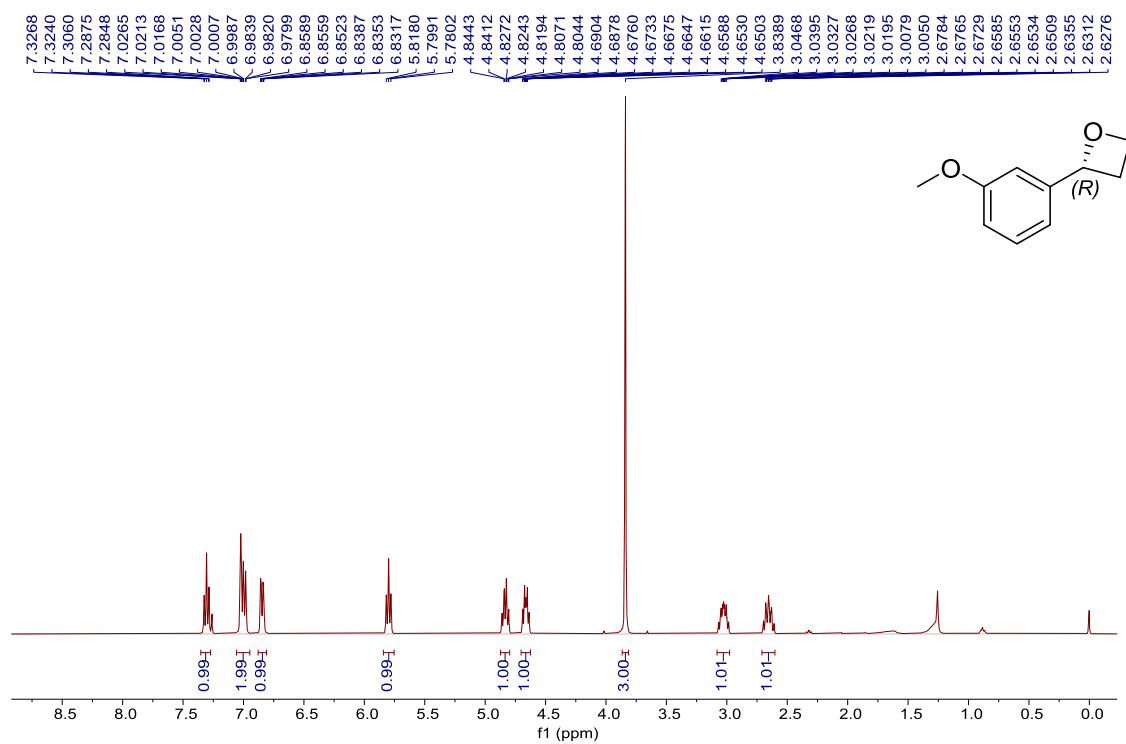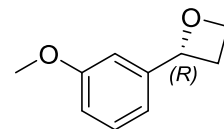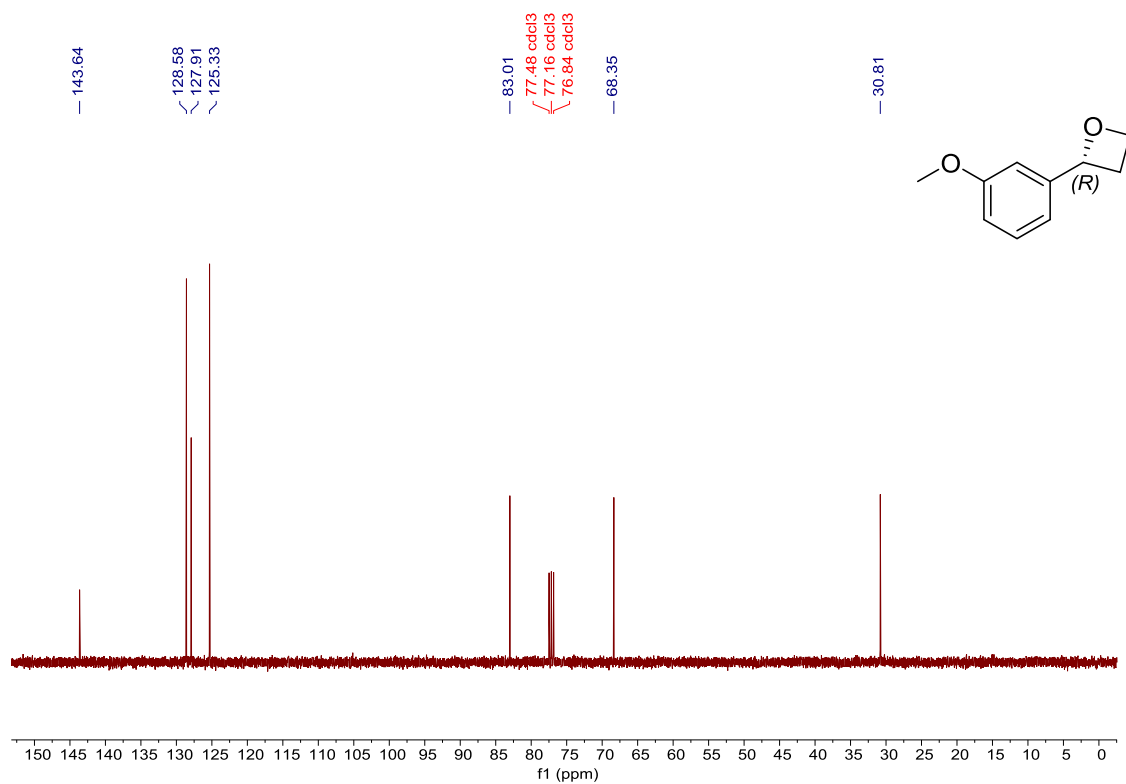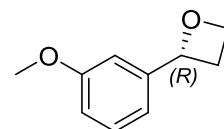

**(R)-2-(4-fluorophenyl) oxetane [(R)-11b]**

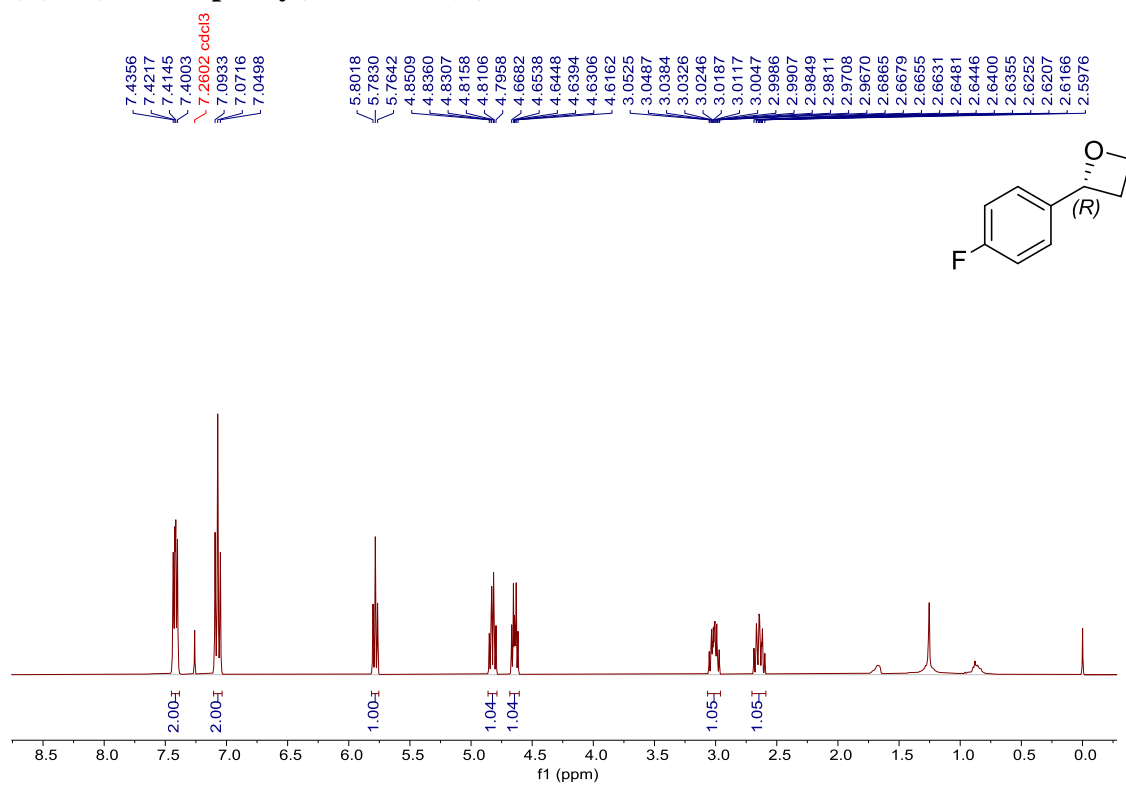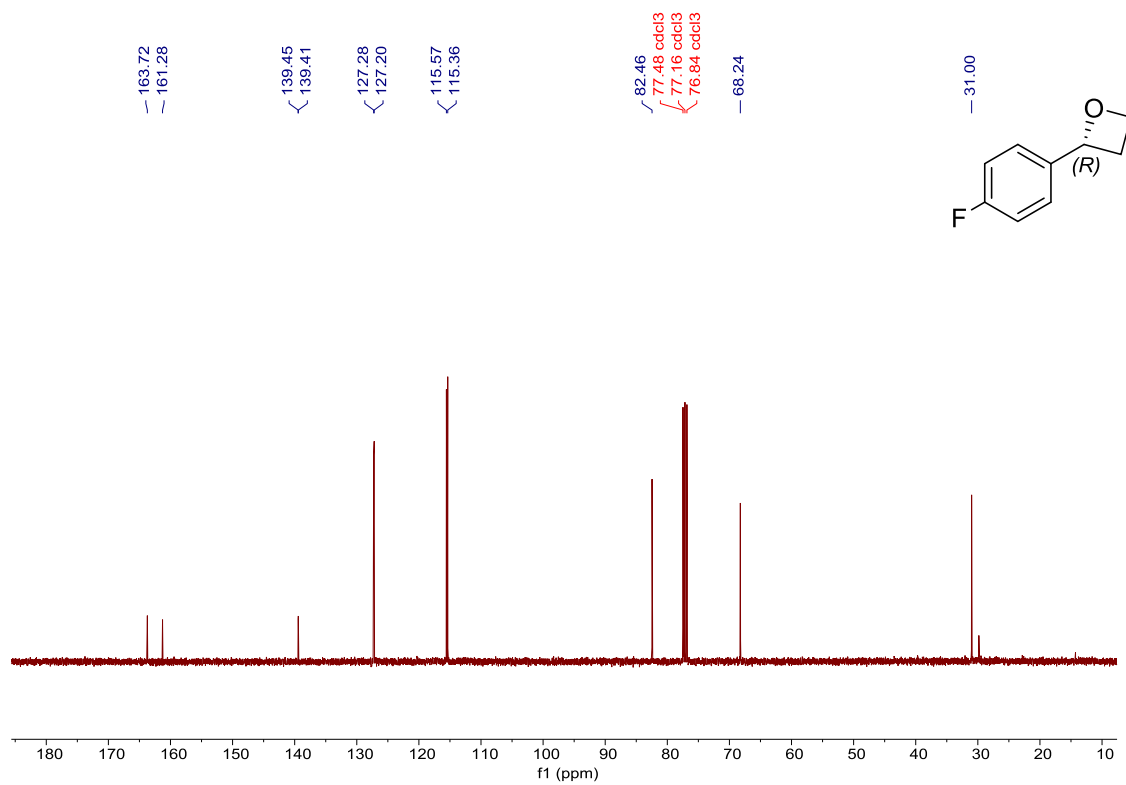

**(R)-2-(4-chlorophenyl) oxetane [(R)-12b]**

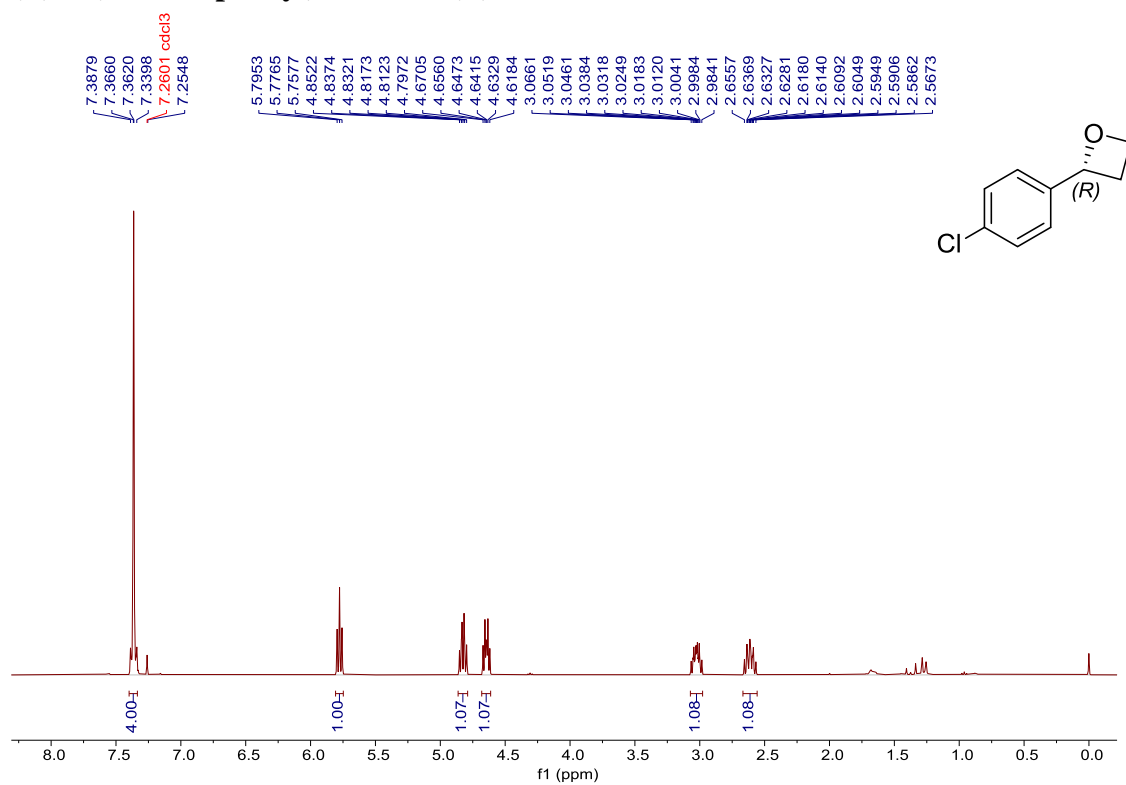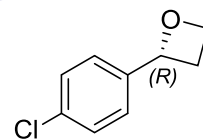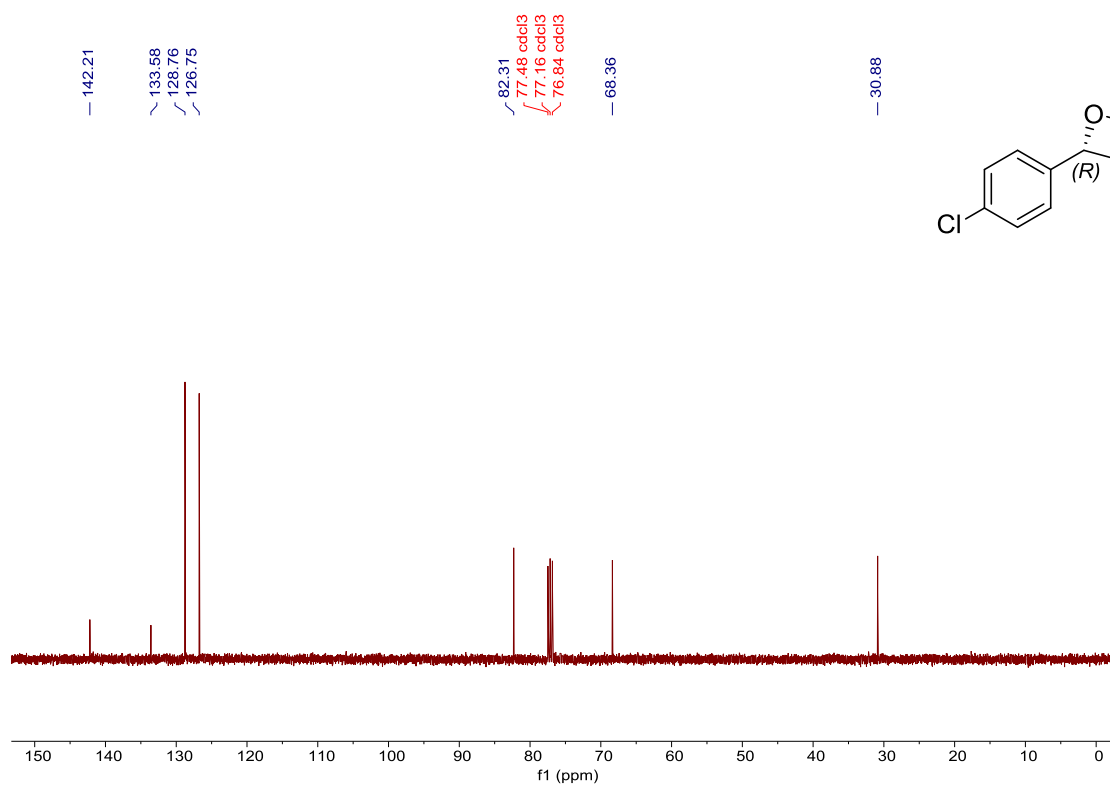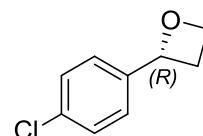

**(R)-2-(4-bromophenyl) oxetane [(R)-13b]**

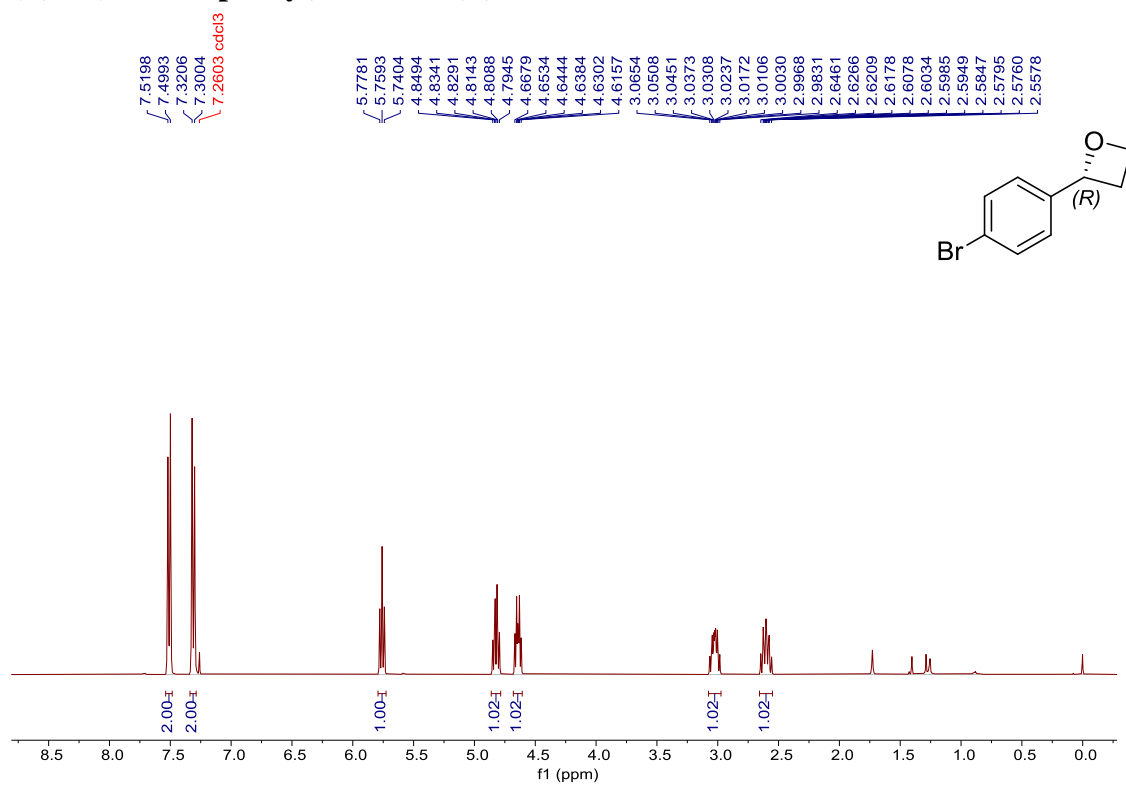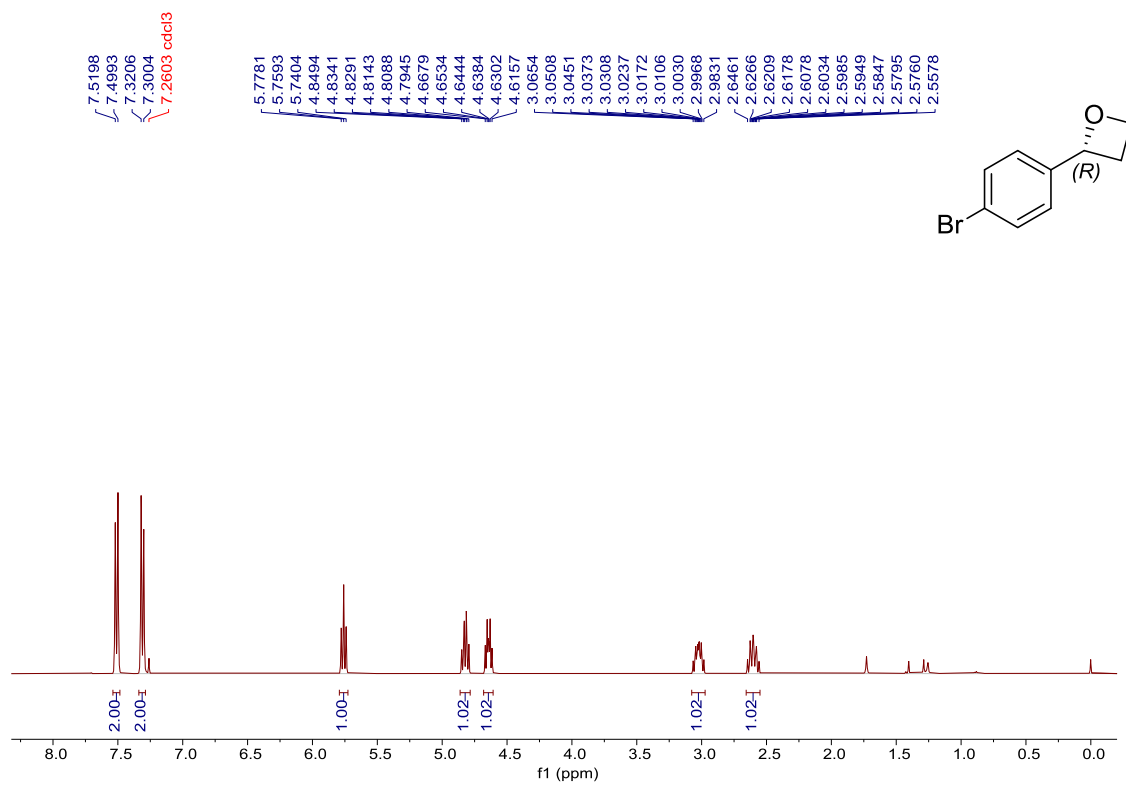

**(R)-2-(4-(trifluoromethyl)phenyl)oxetane [(R)-14b]**

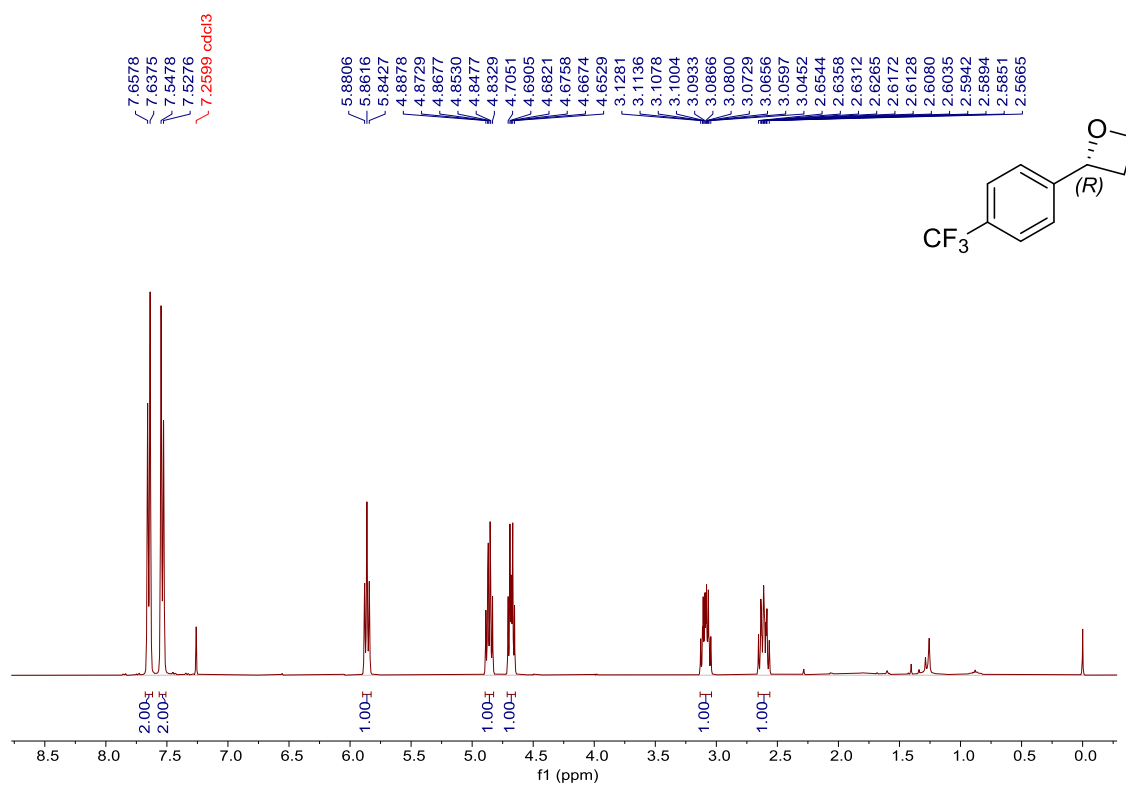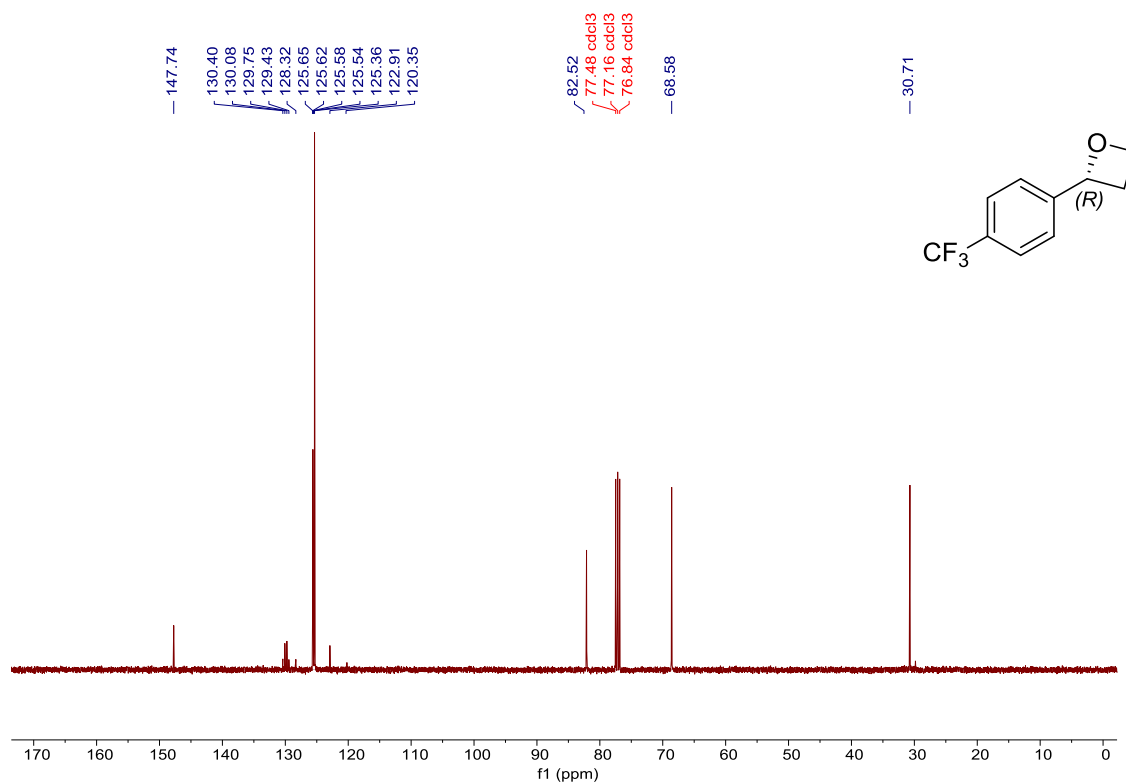

**(R)-2-(3, 5-difluorophenyl)oxetane [(R)-15b]**

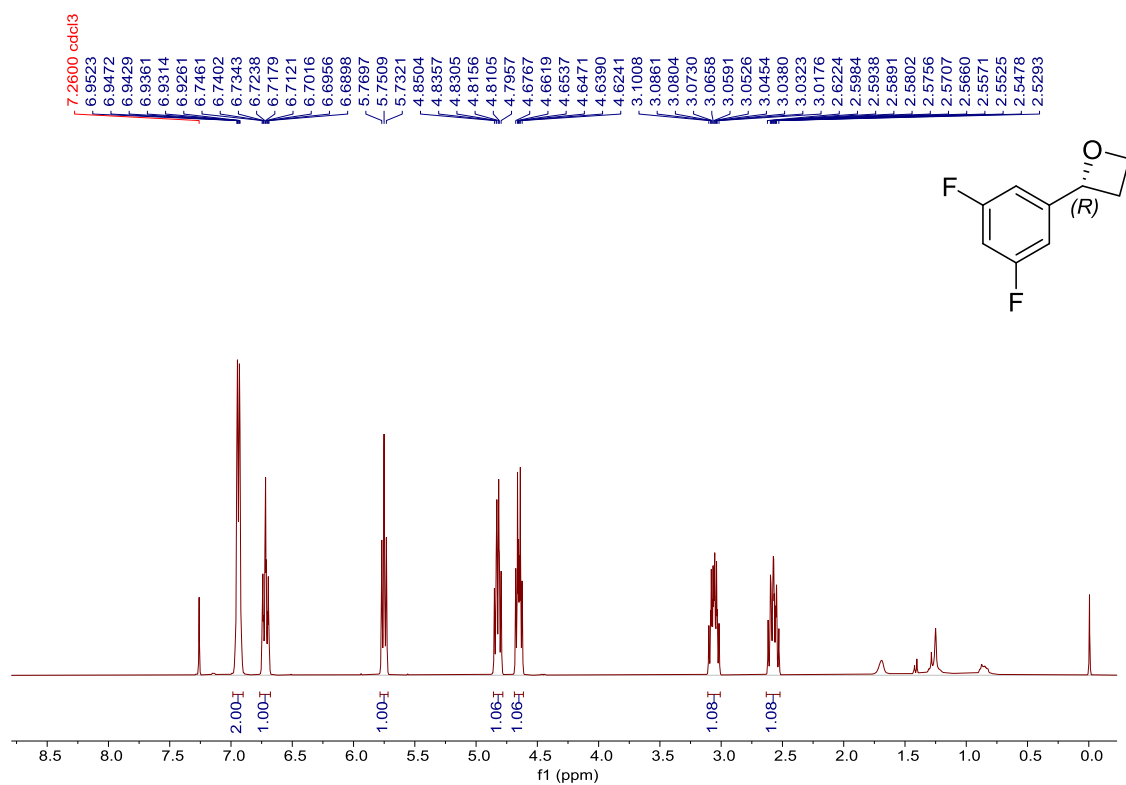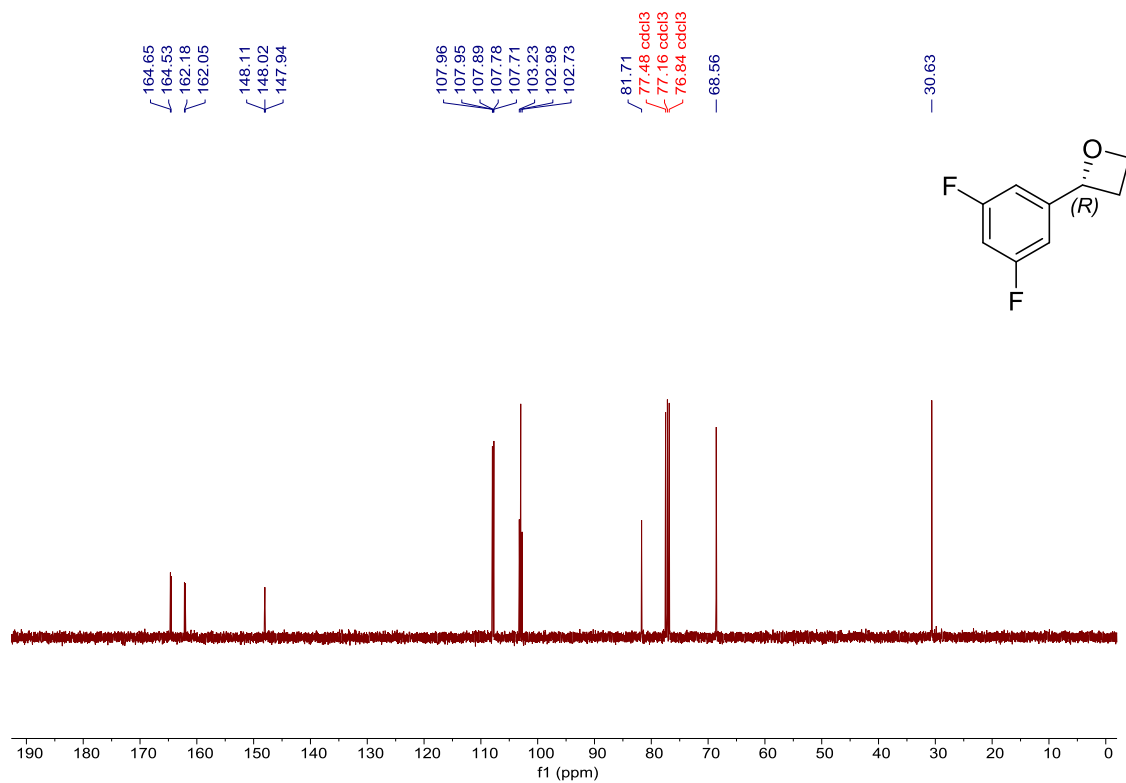



**(R)-2-(naphthalen-2-yl)oxetane [(R)-16b]**

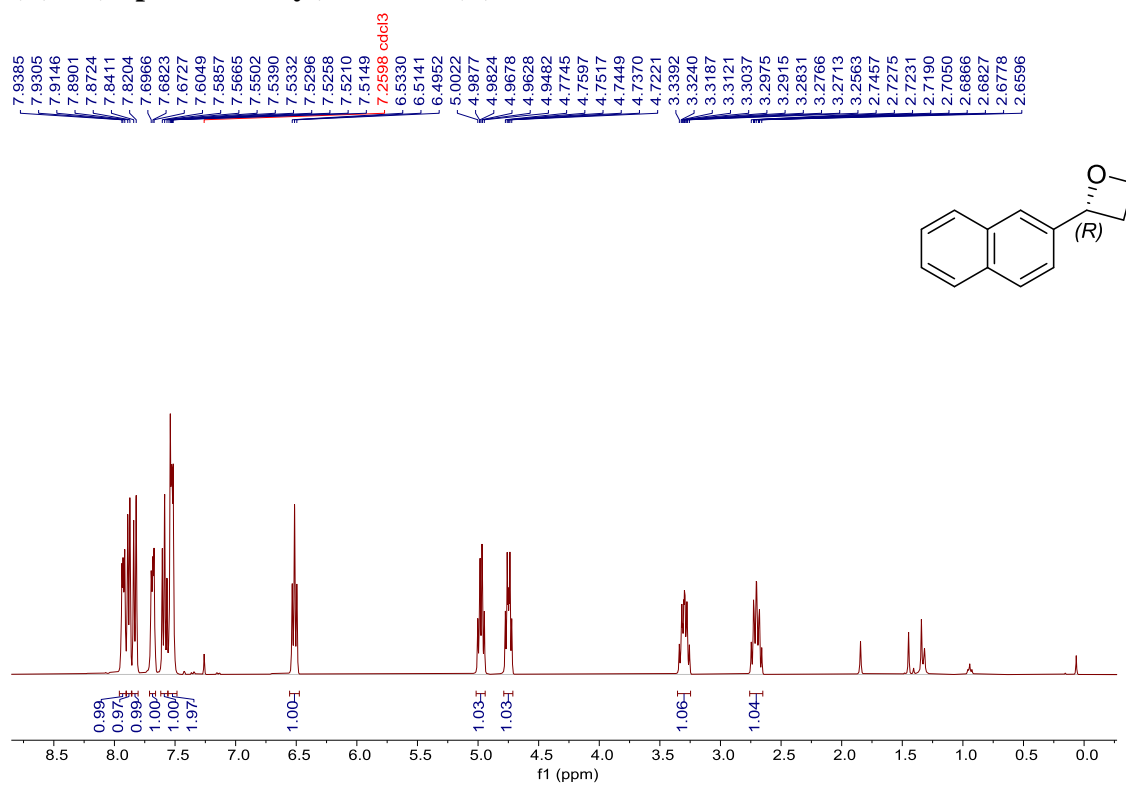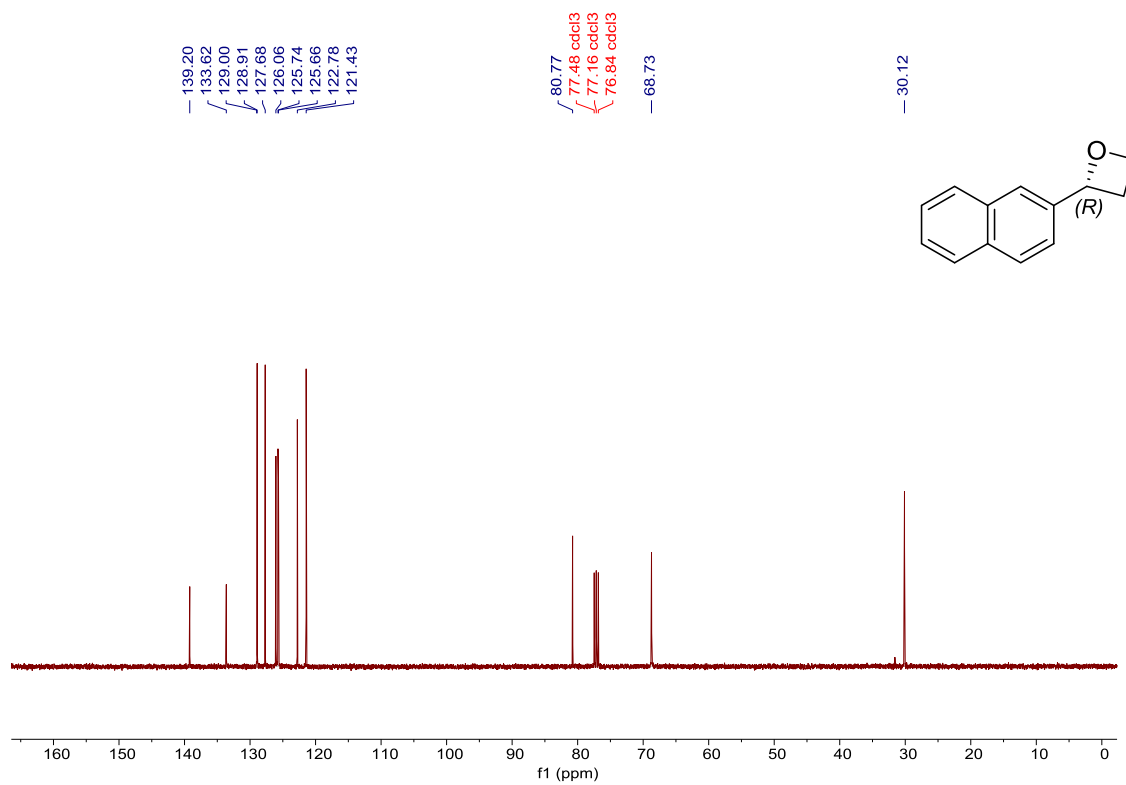

**(R)-2-methyl-2-phenyloxetane [(R)-17b]**

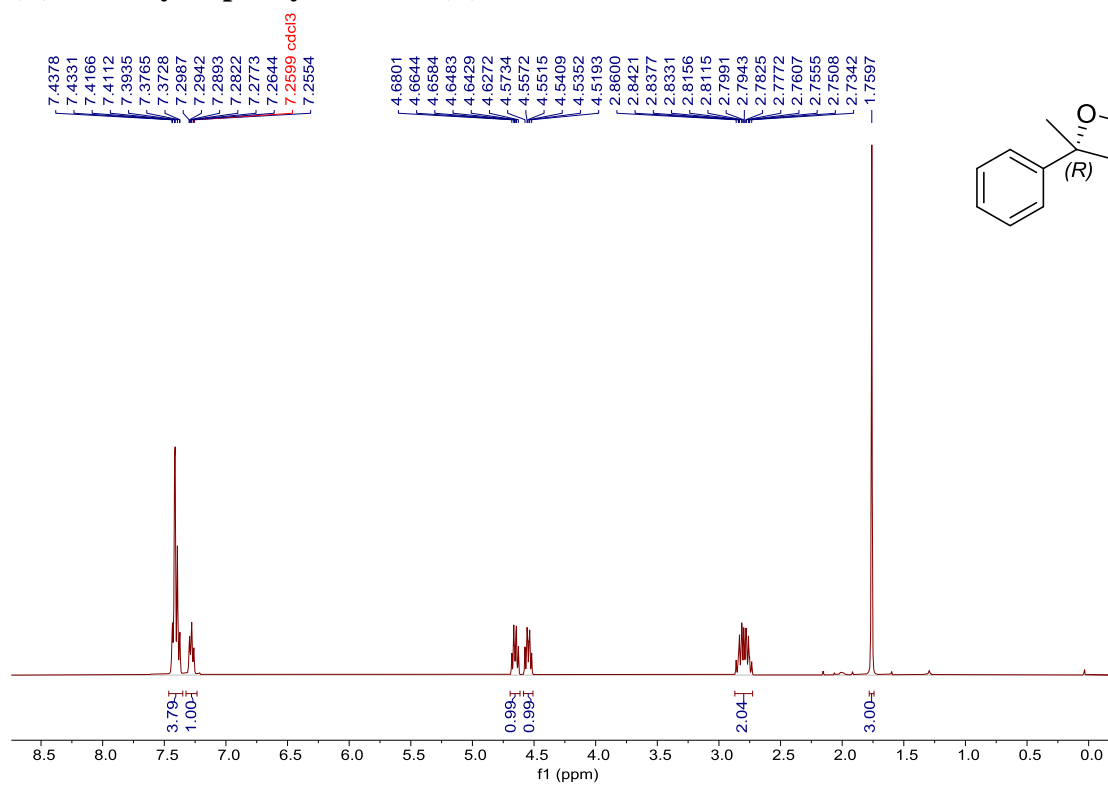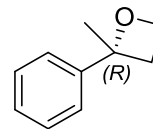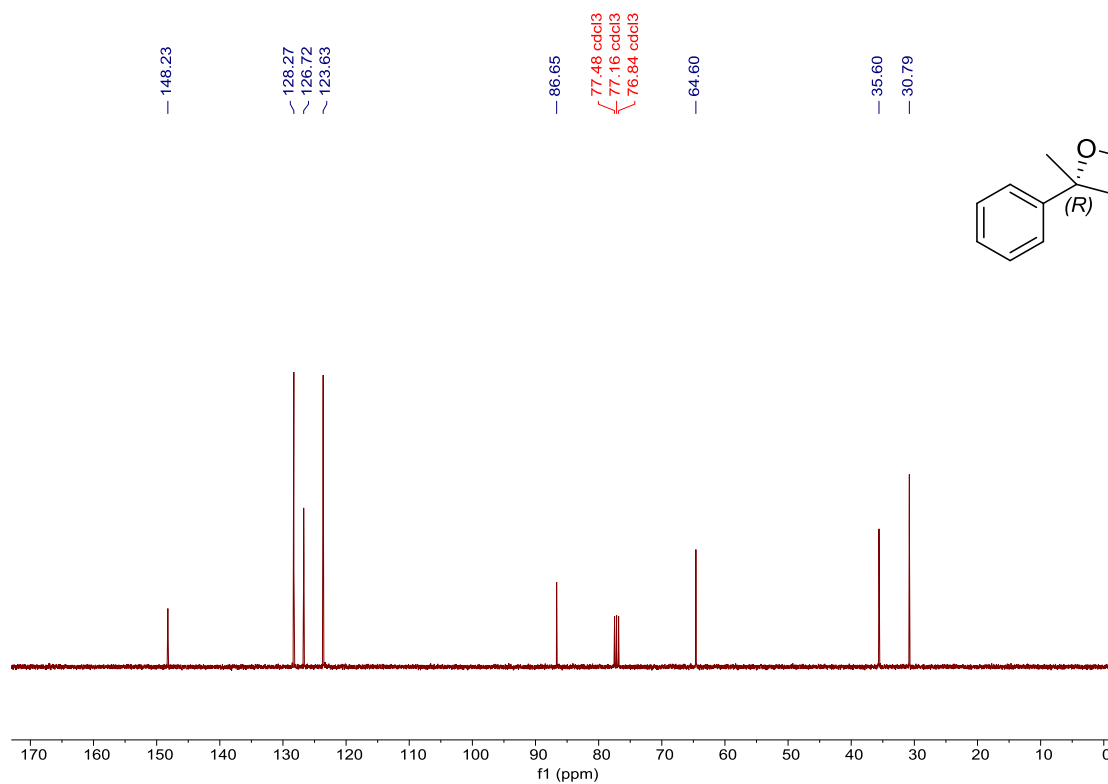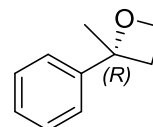

**(R)-3-bromo-5-(oxetan-2-yl)pyridine [(R)-18b]**

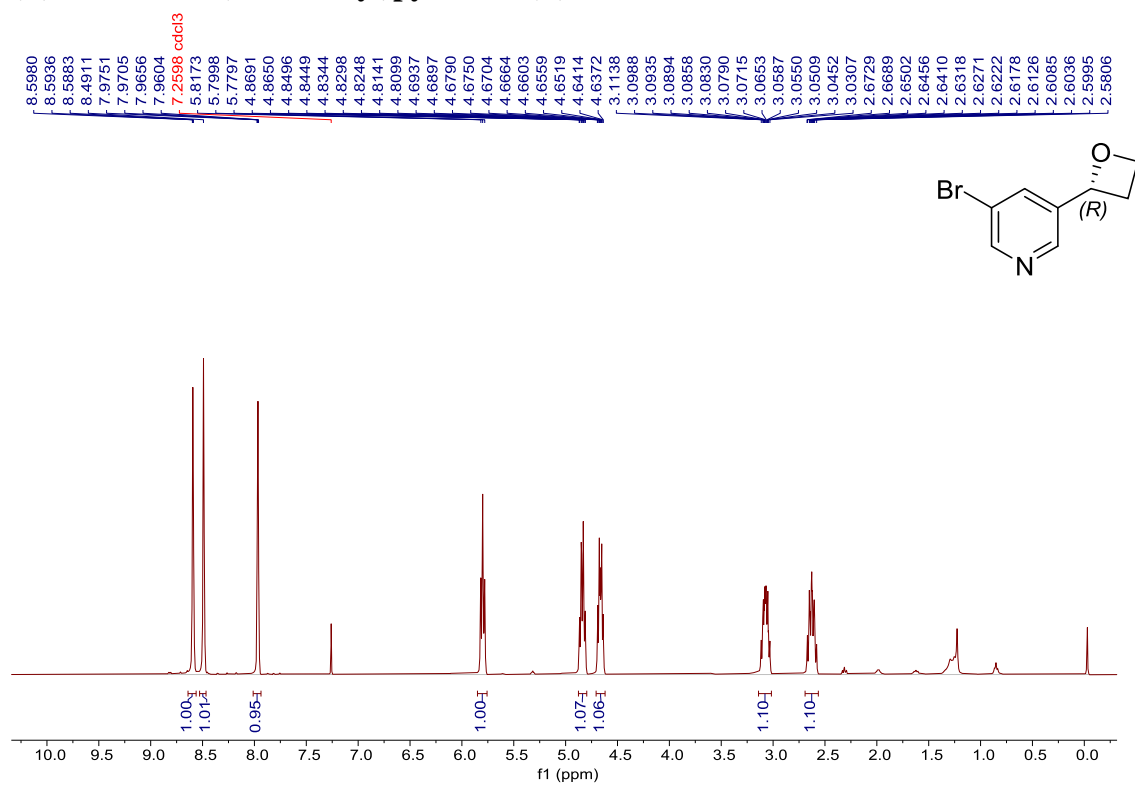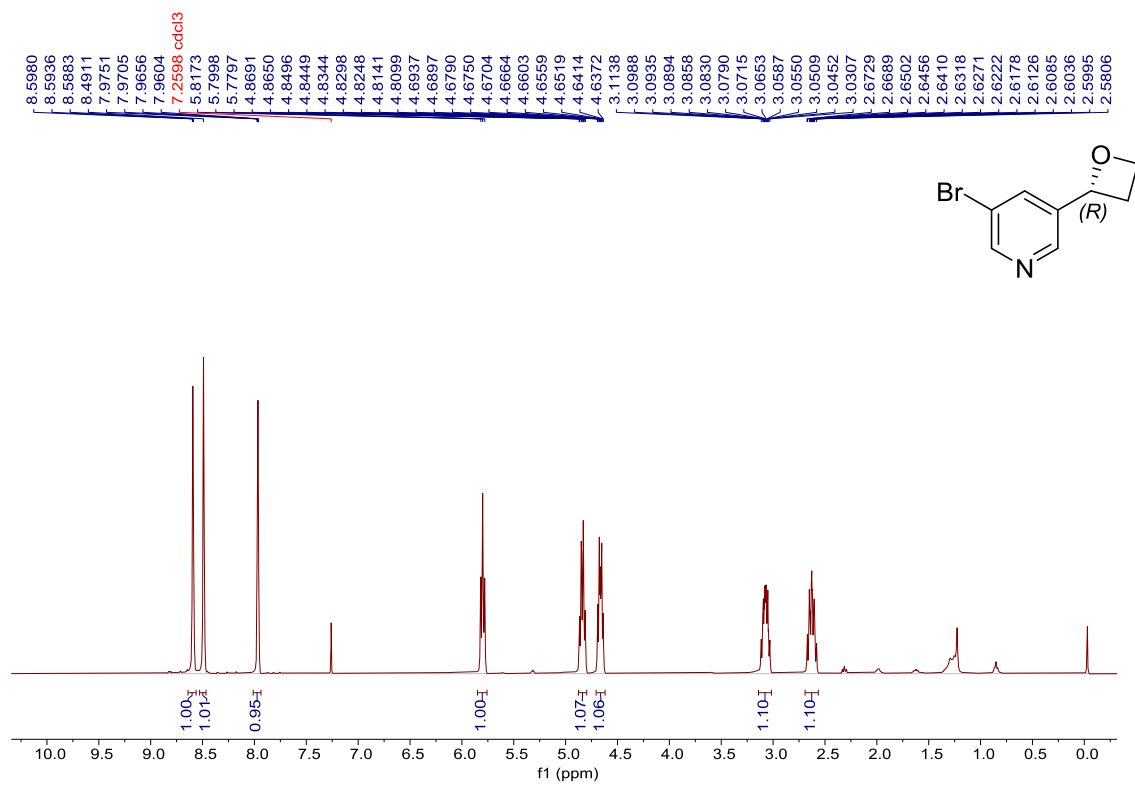

**(R)-3-bromo-5-(oxetan-2-yl)pyridine [(R)-19b]**

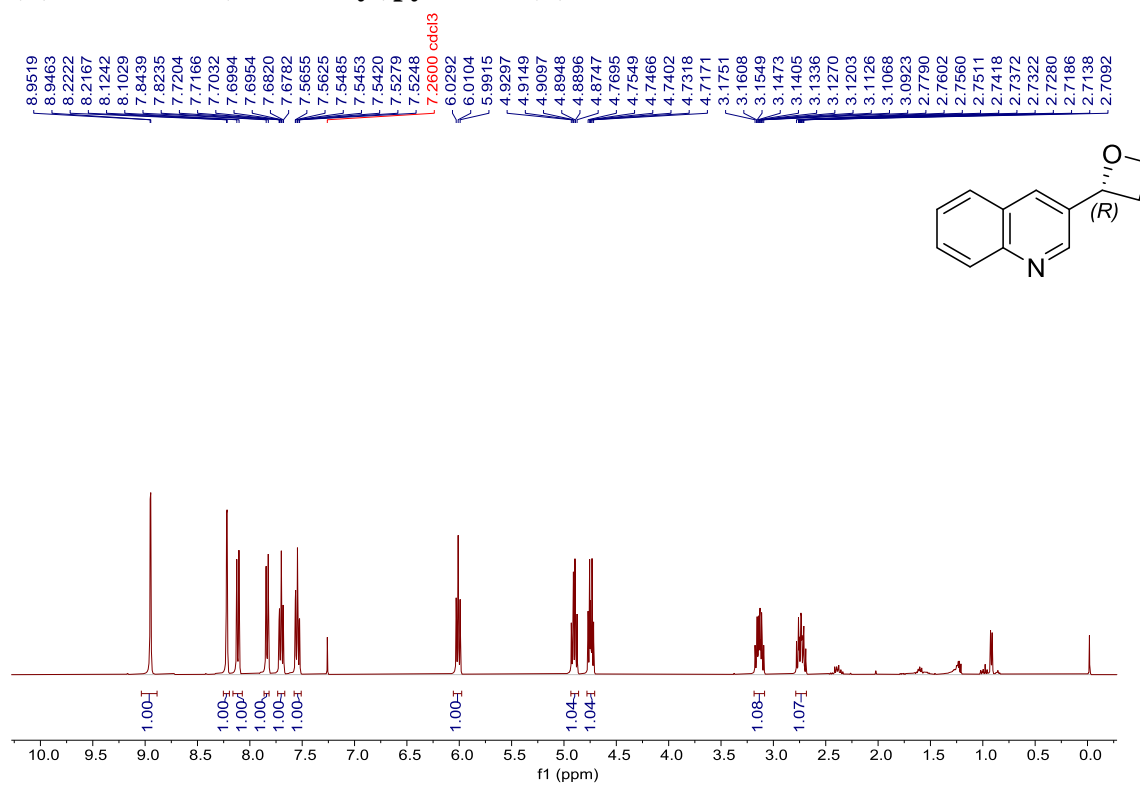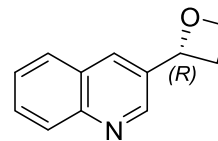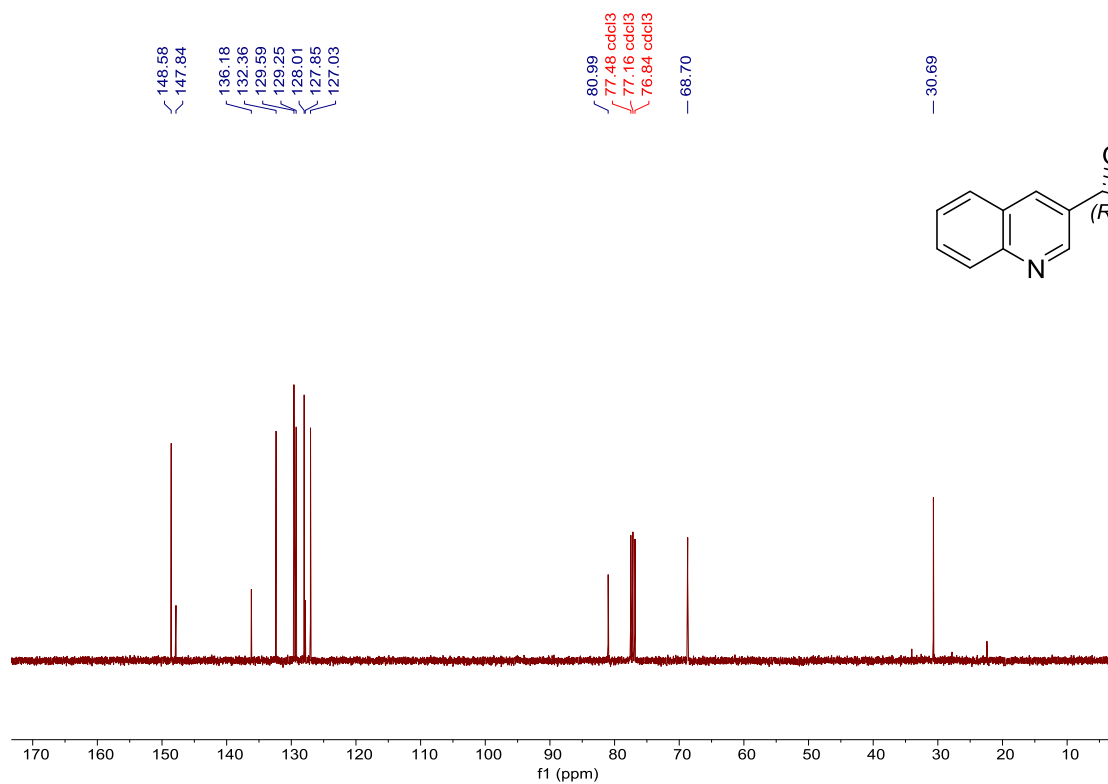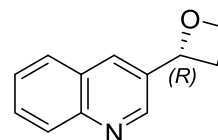

**(R)-2-cyclohexyloxetane [(R)-21b]**

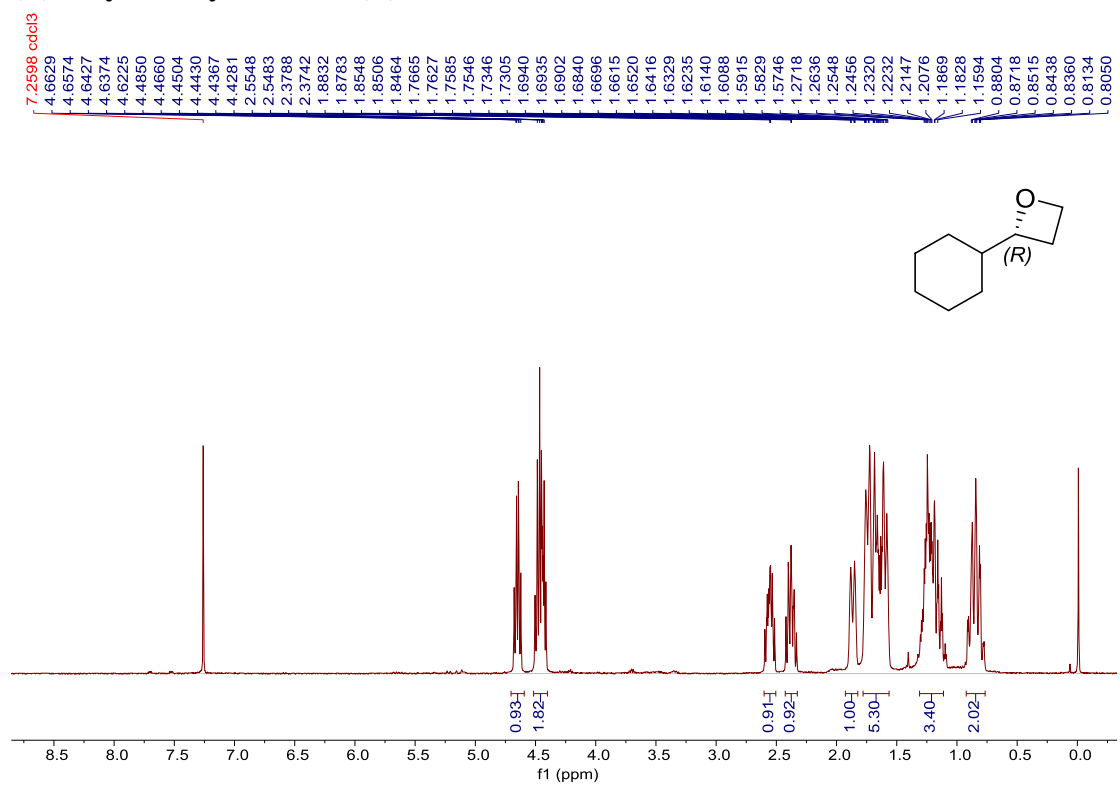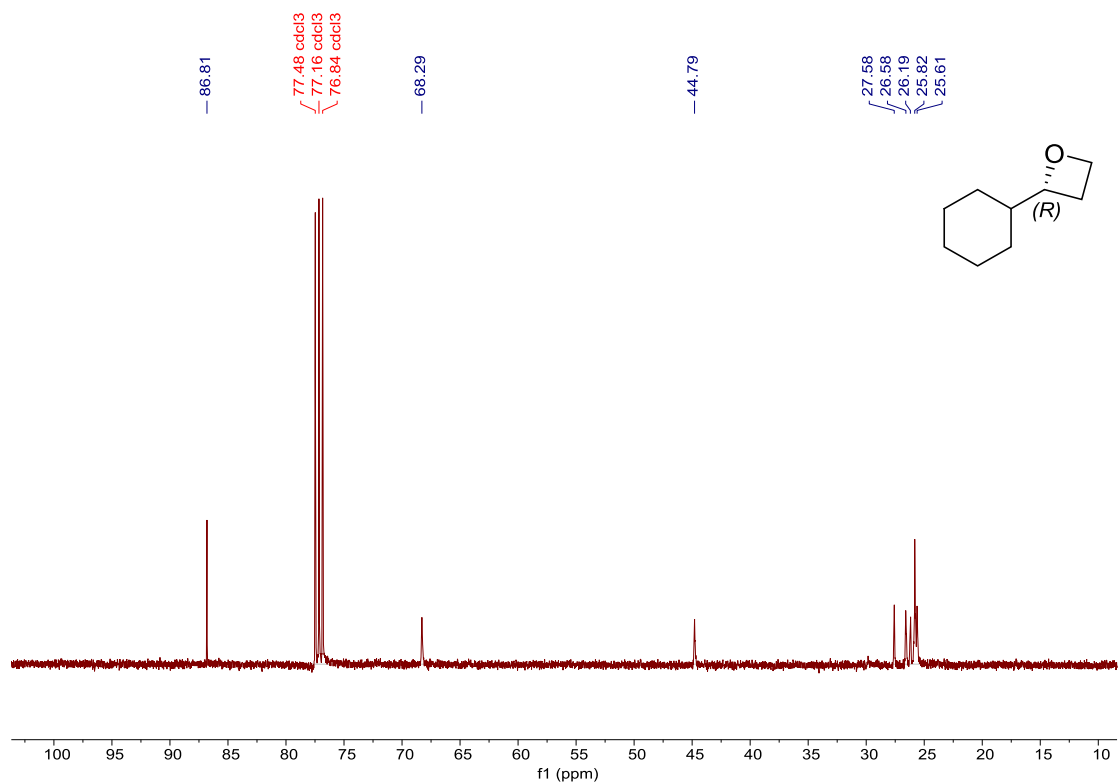

**(S)-2-phenyloxetane [(S)-1b] (Ring opening by azide)**

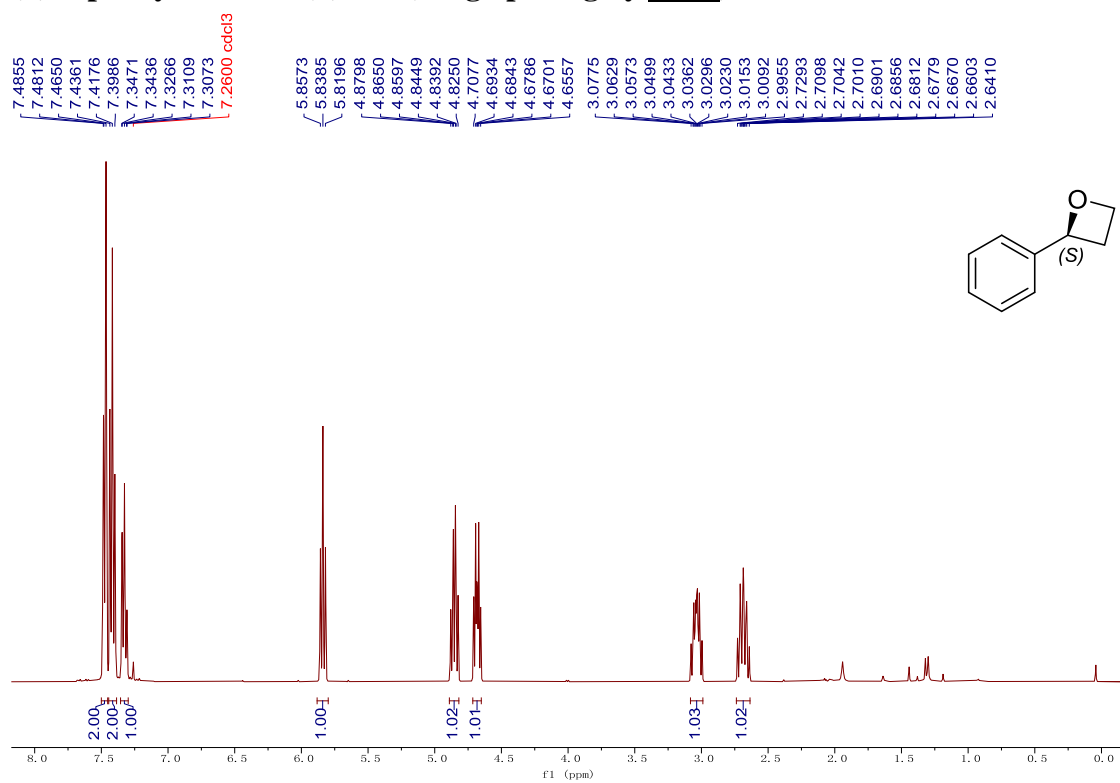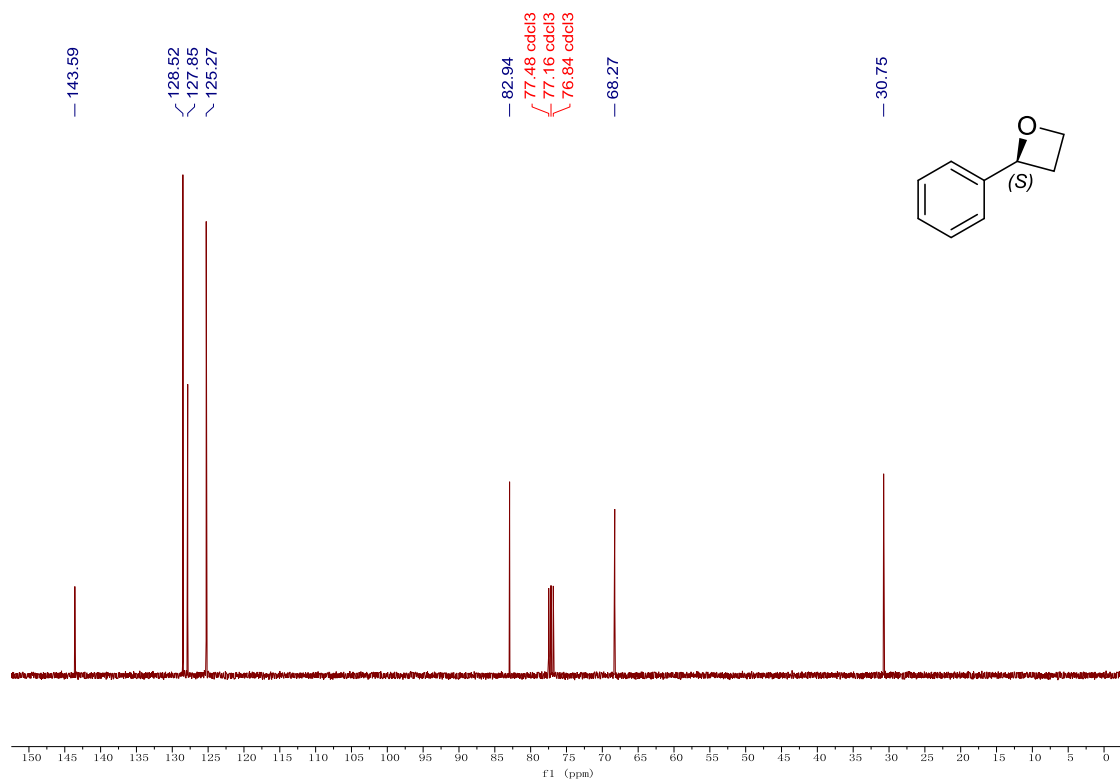

**(S)-2-phenyloxetane [(S)-1b] (Ring opening by cyanide)**

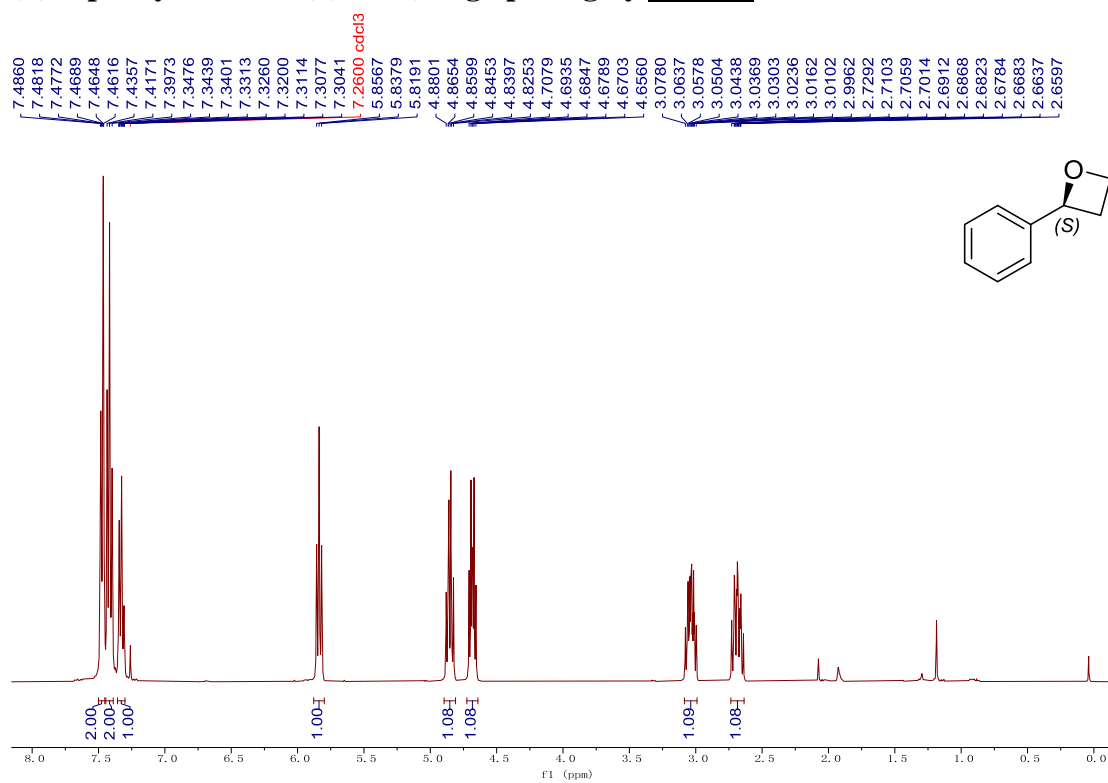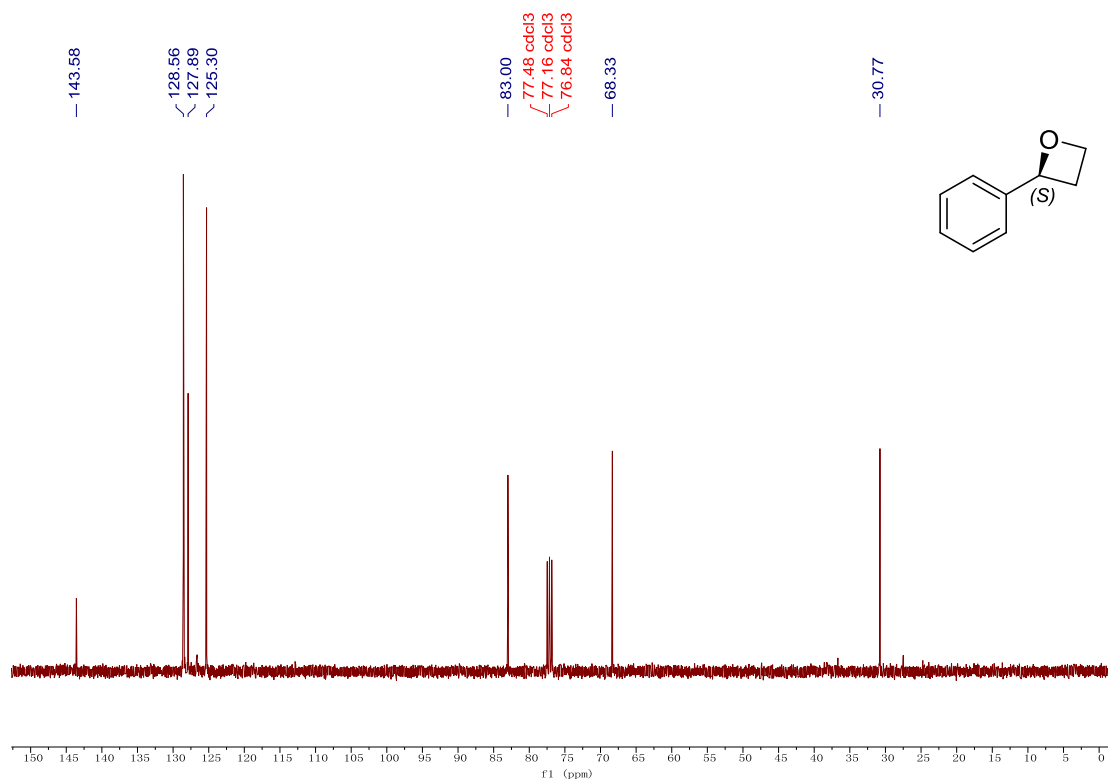

**(S)-2-phenyloxetane [(S)-1b] (Ring opening by nitrite)**

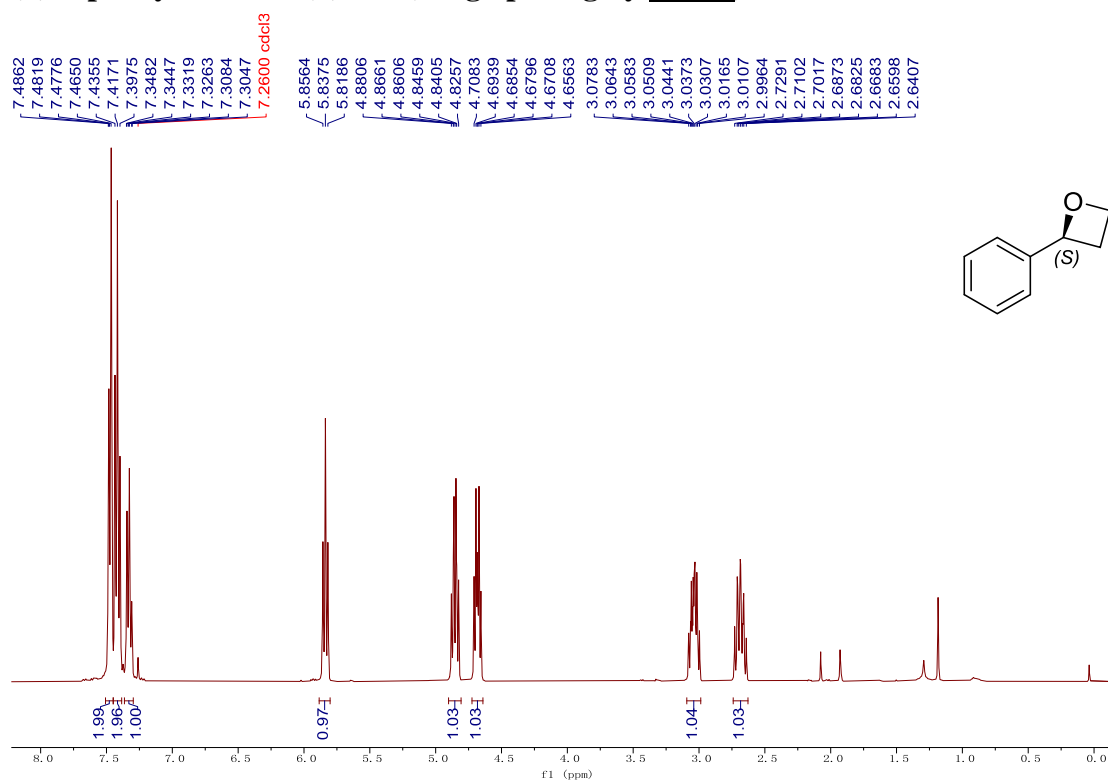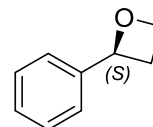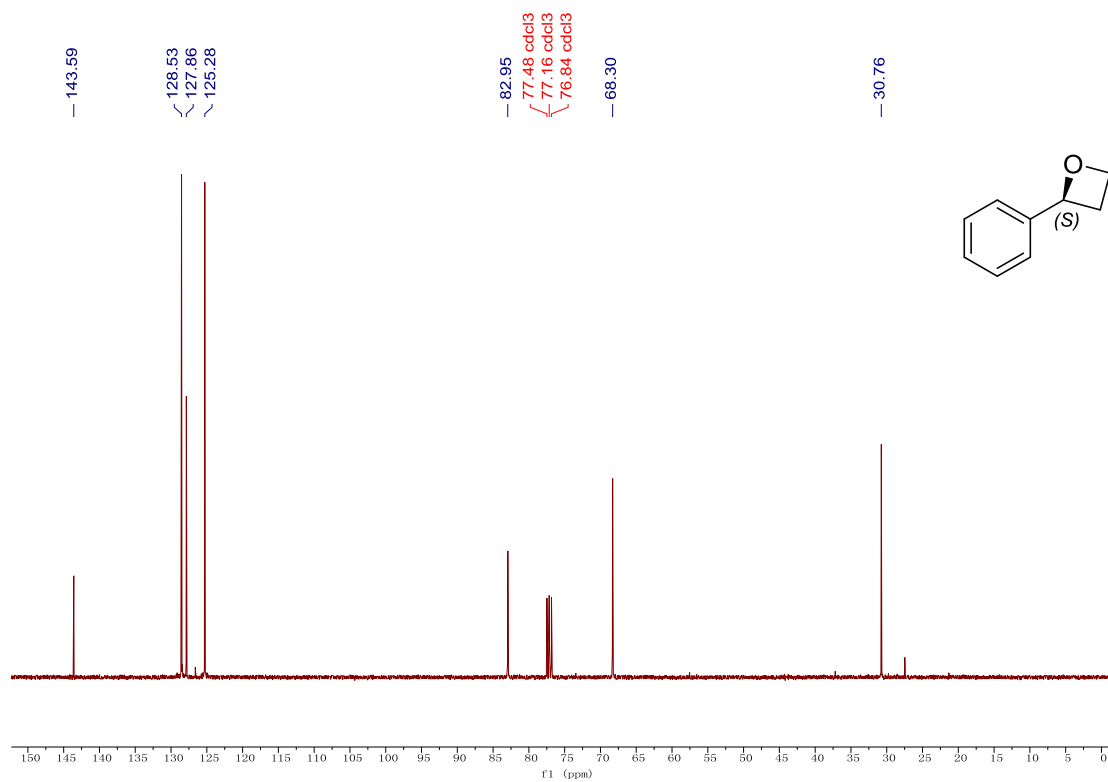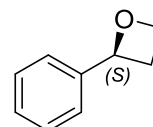



**(S)-2-(2-fluorophenyl)oxetane [(S)-2b]**

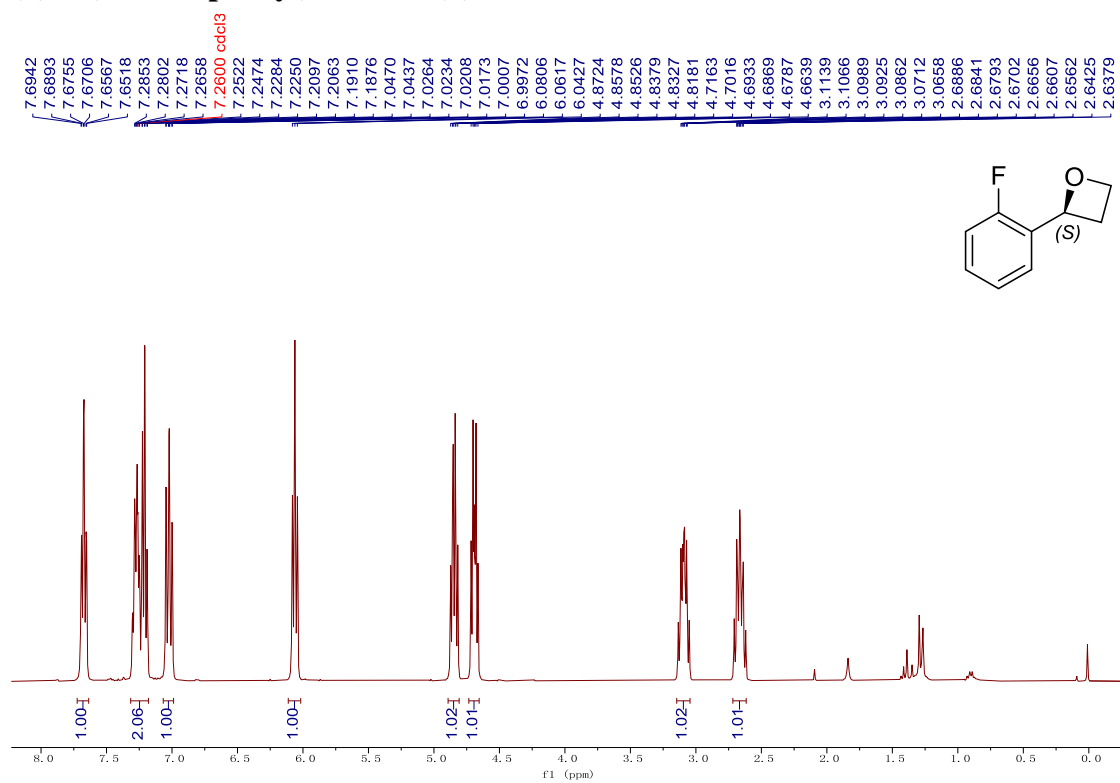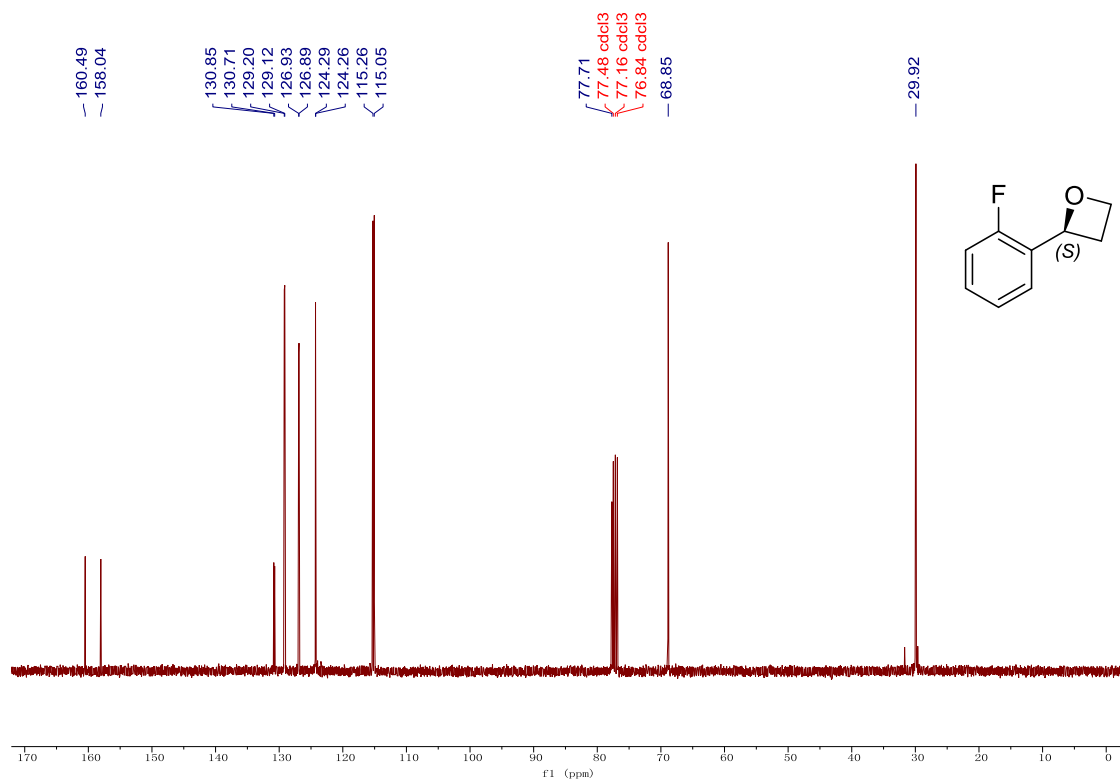

**(S)-2-(2-chlorophenyl)oxetane [(S)-3b]**

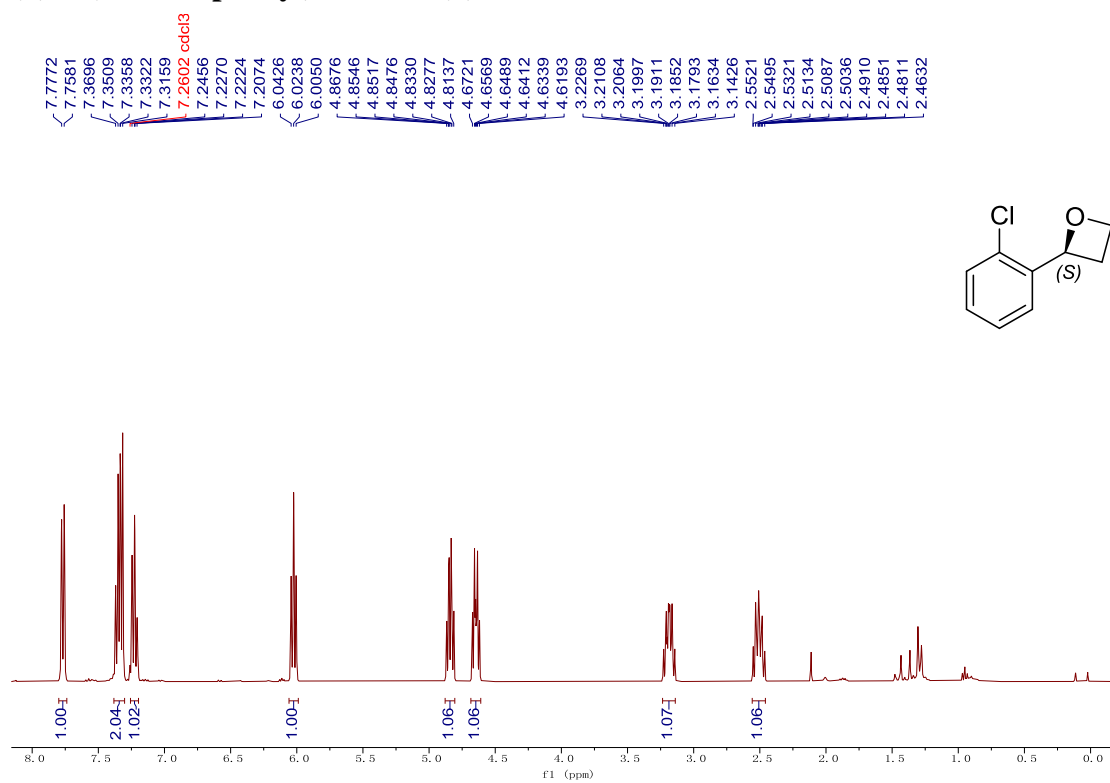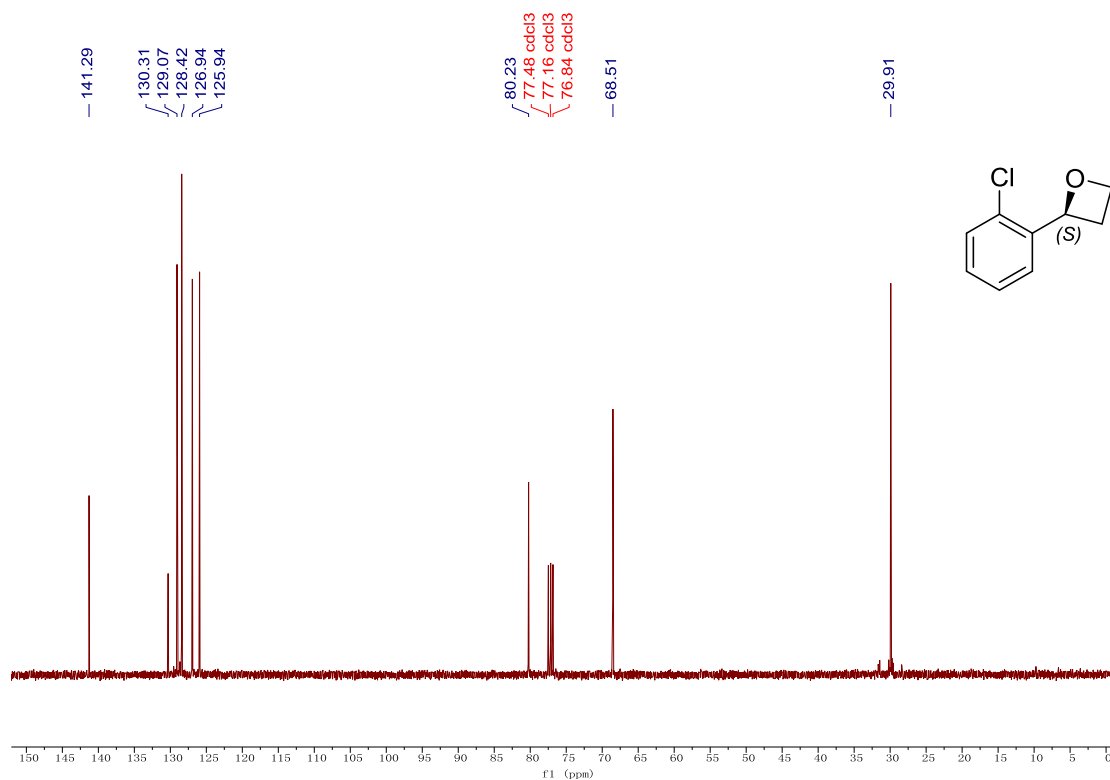

**(S)-2-(2-bromophenyl)oxetane [(S)-4b]**

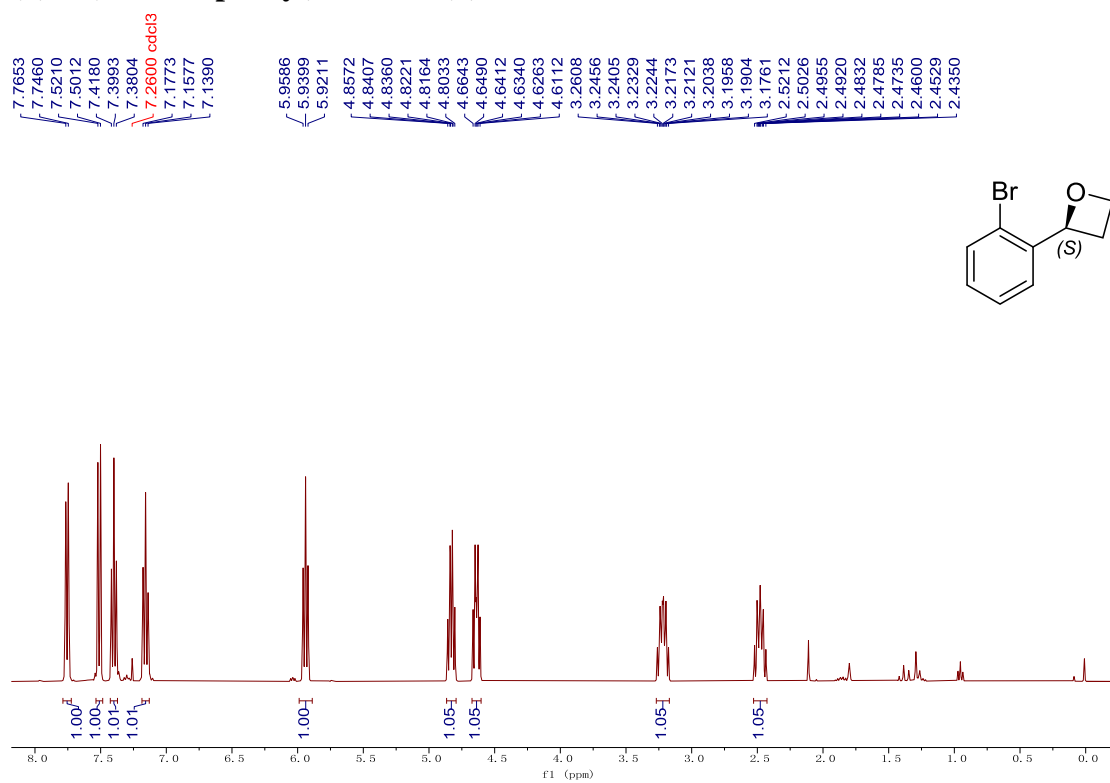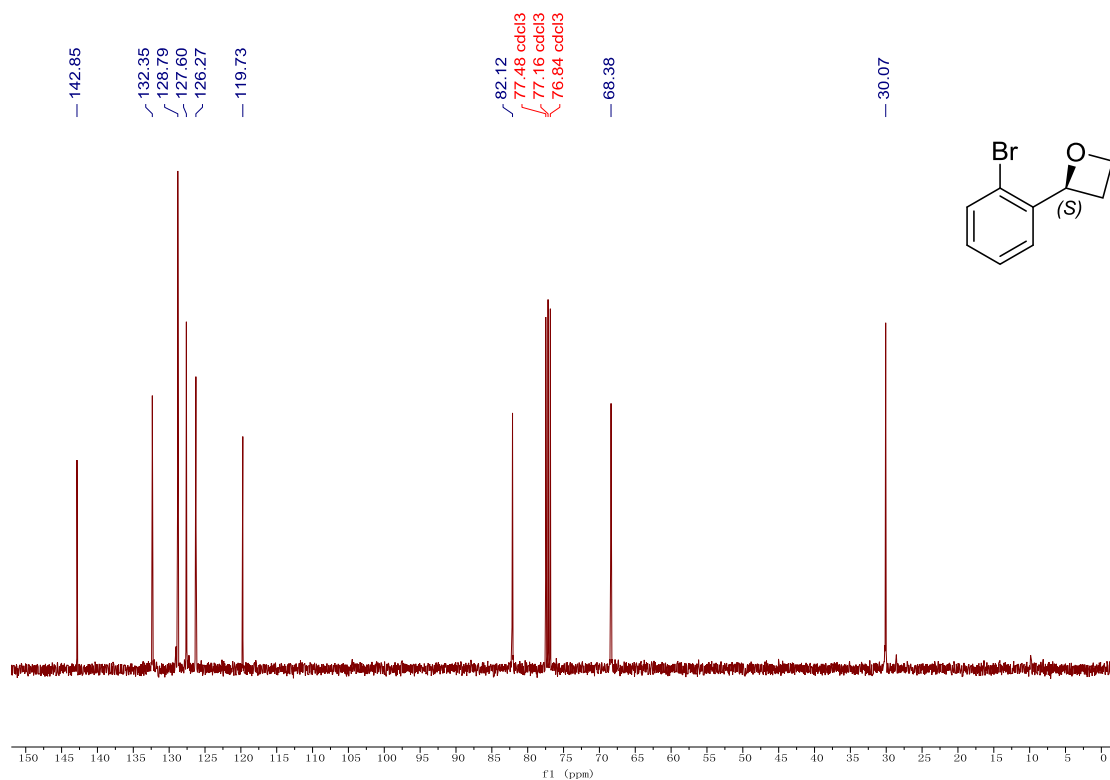

**(S)-2-(o-tolyl)oxetane [(S)-5b]**

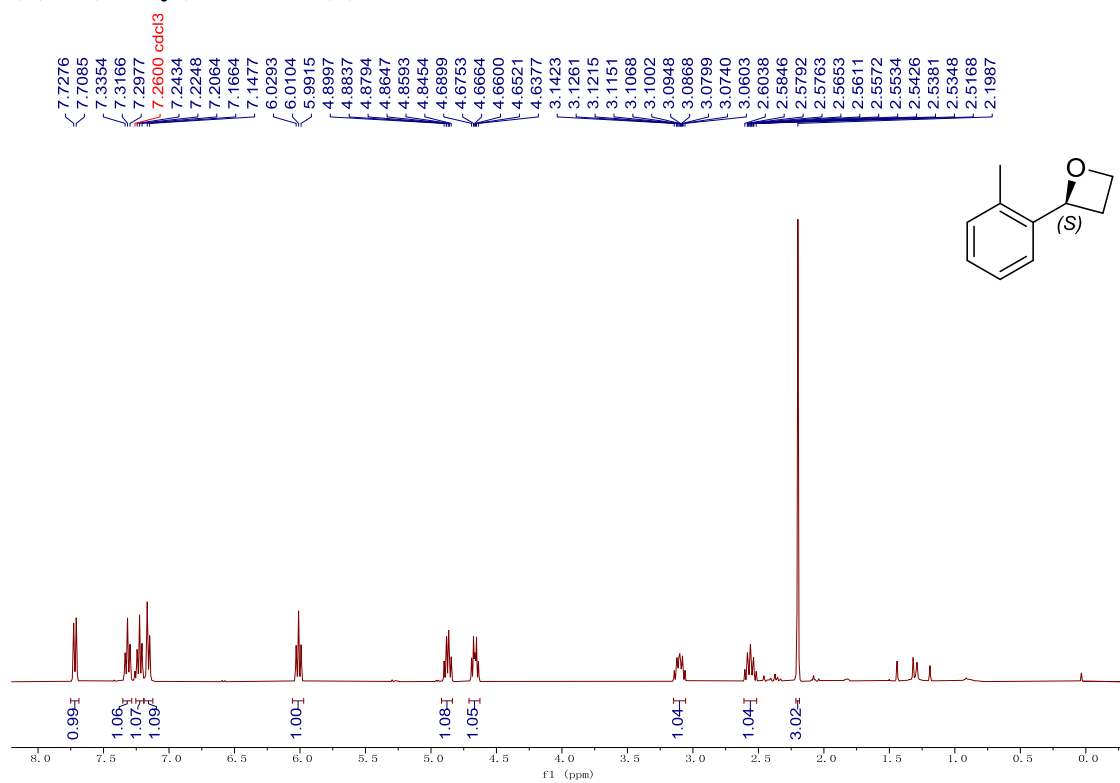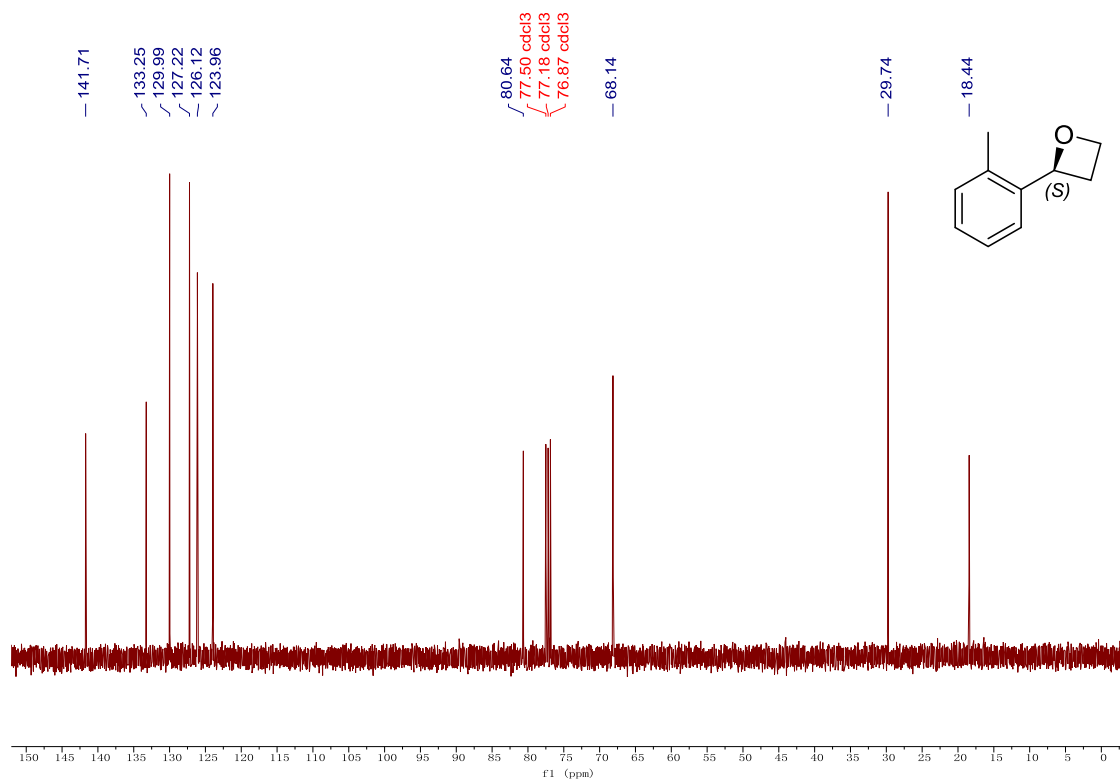

**(S)-2-(3-fluorophenyl)oxetane [(S)-6b]**

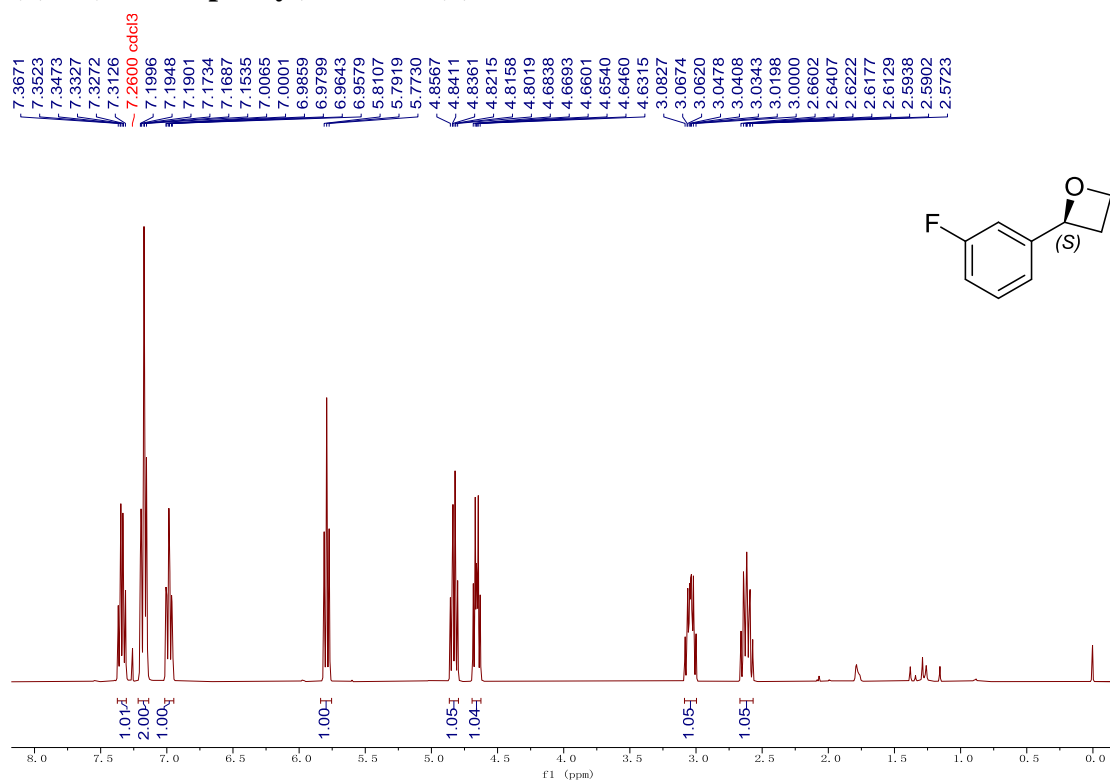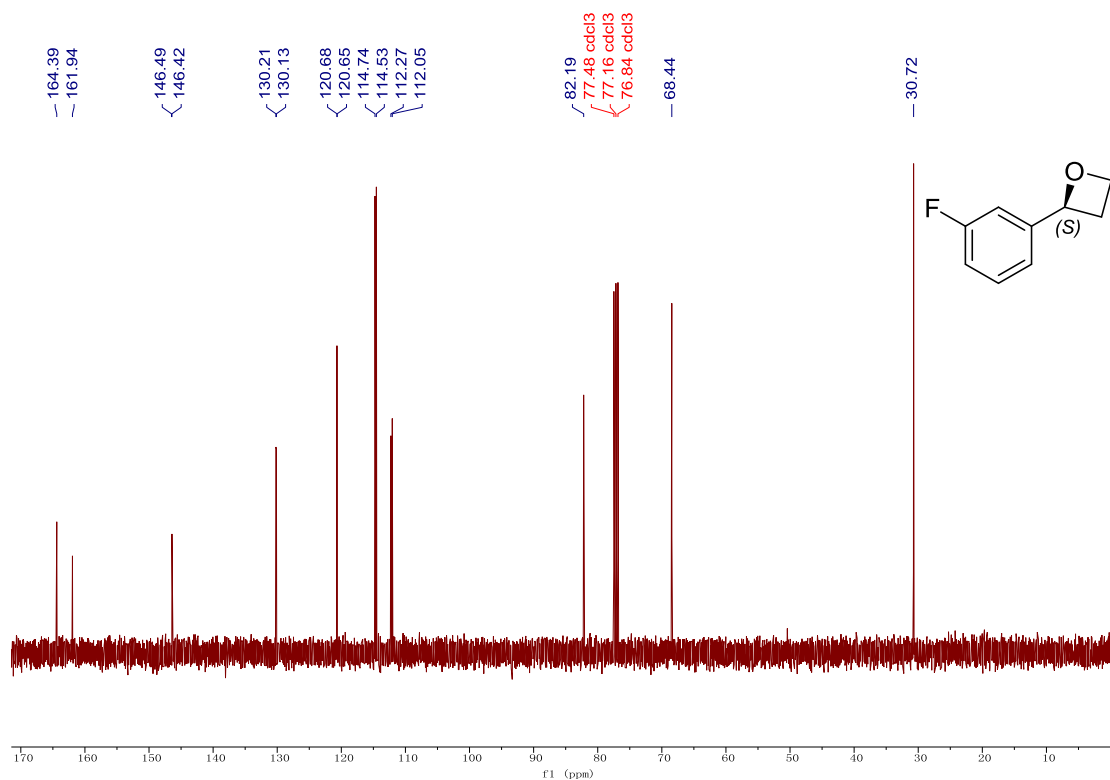

**(S)-2-(3-chlorophenyl)oxetane [(S)-7b]**

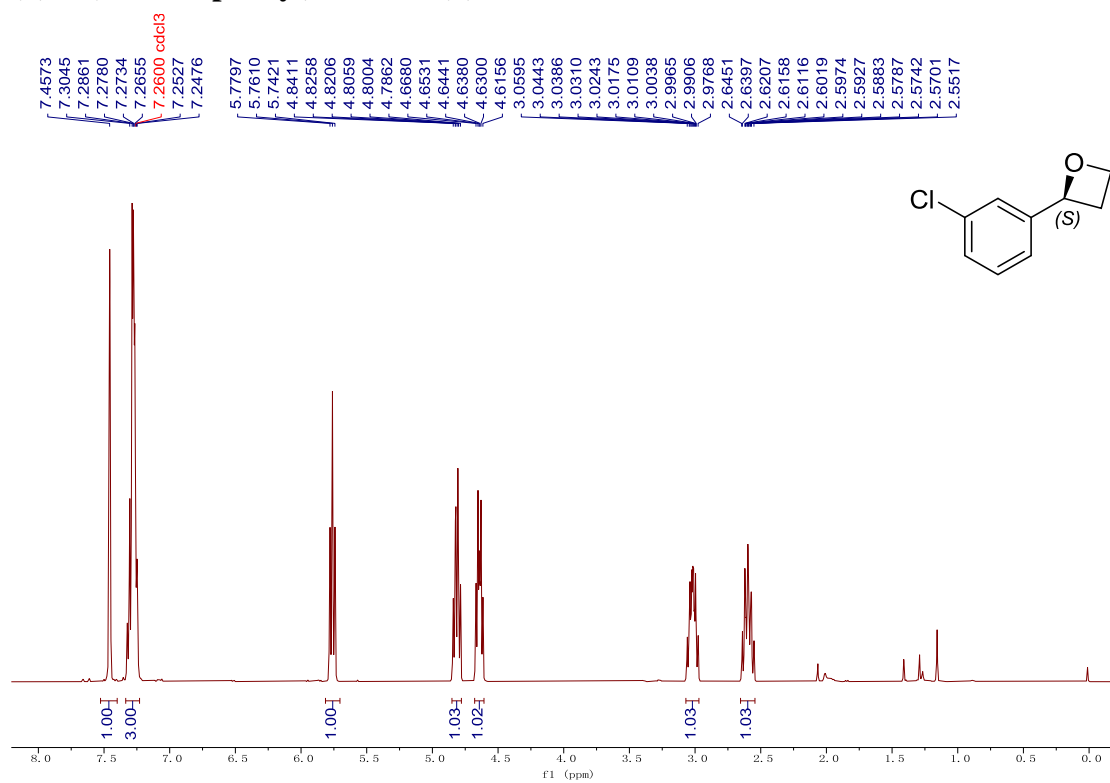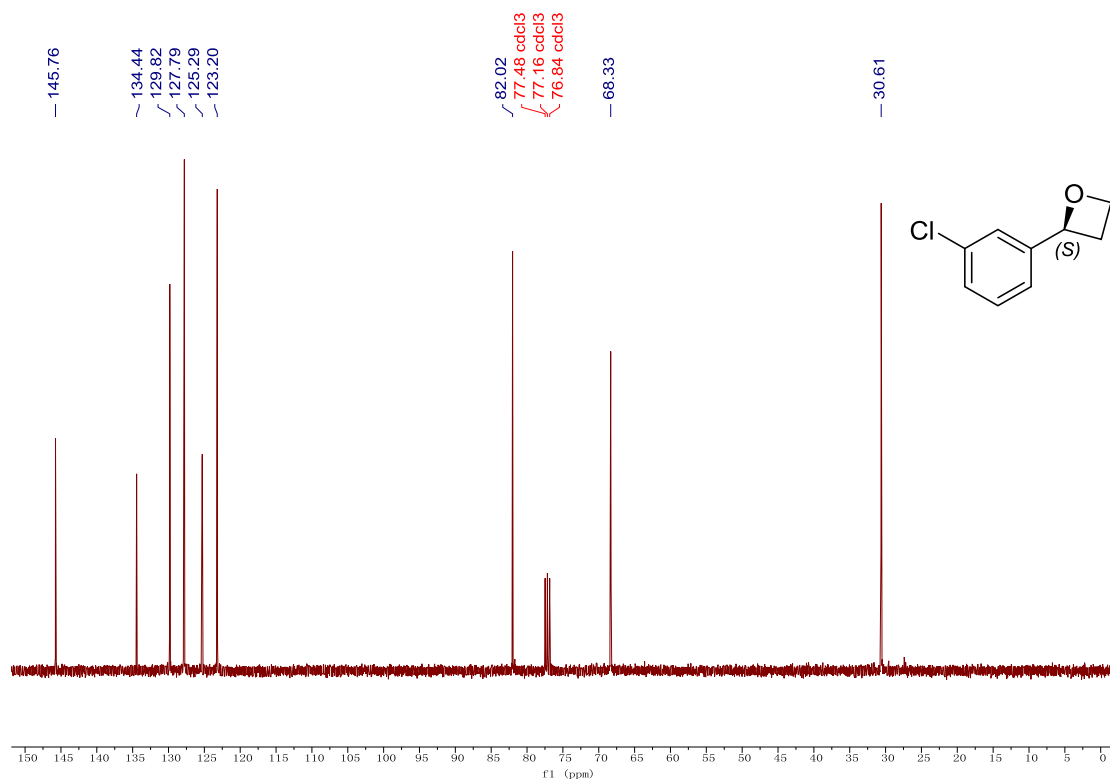

**(S)-2-(3-bromophenyl)oxetane [(S)-8b]**

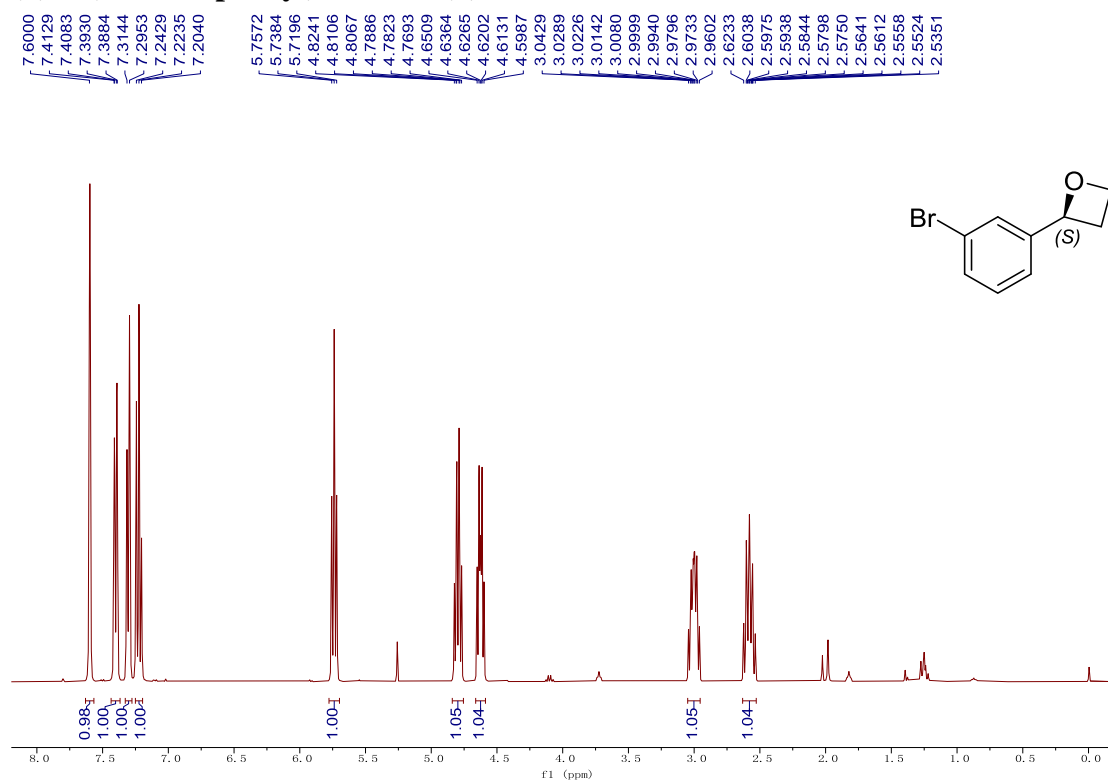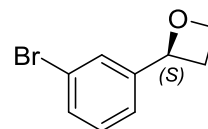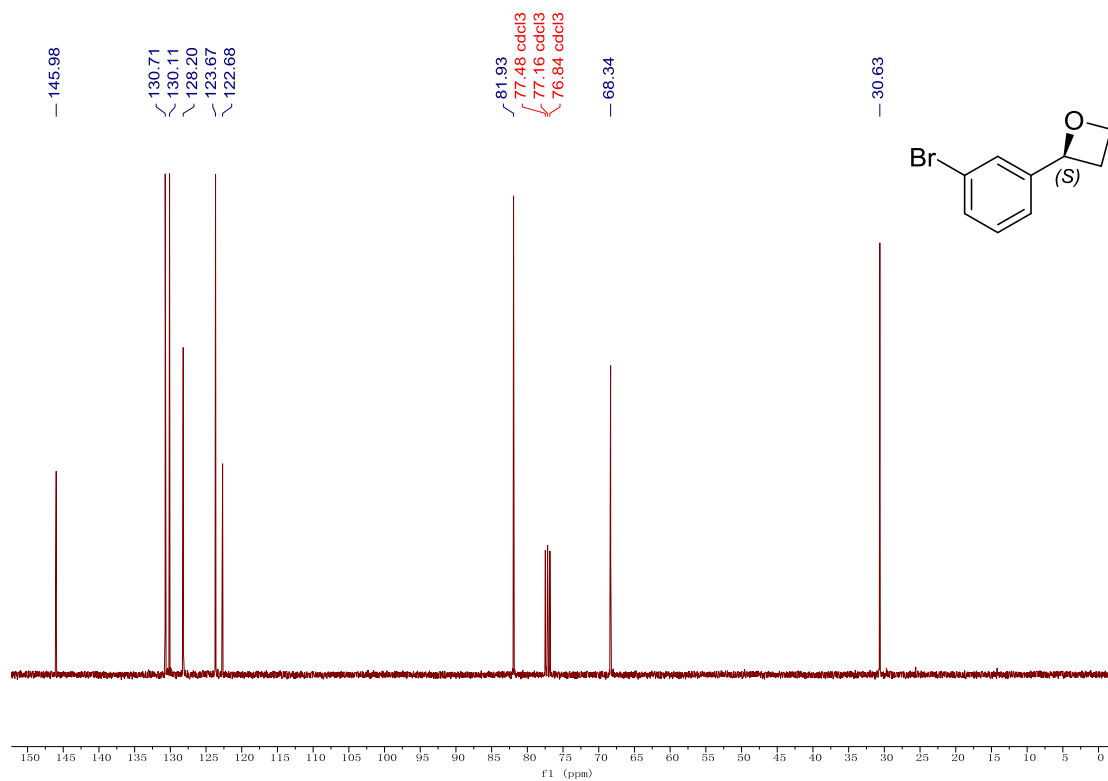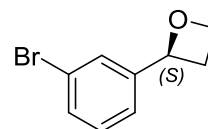

**(S)-2-(*m*-tolyl)oxetane [(S)-9b]**

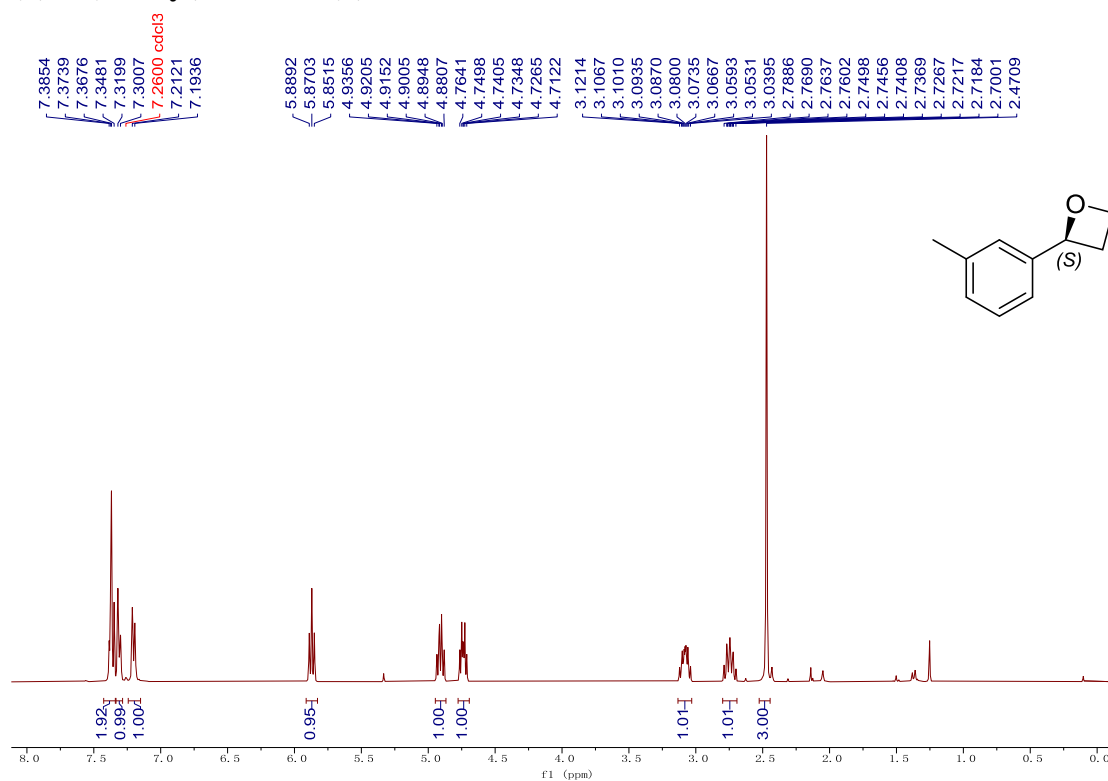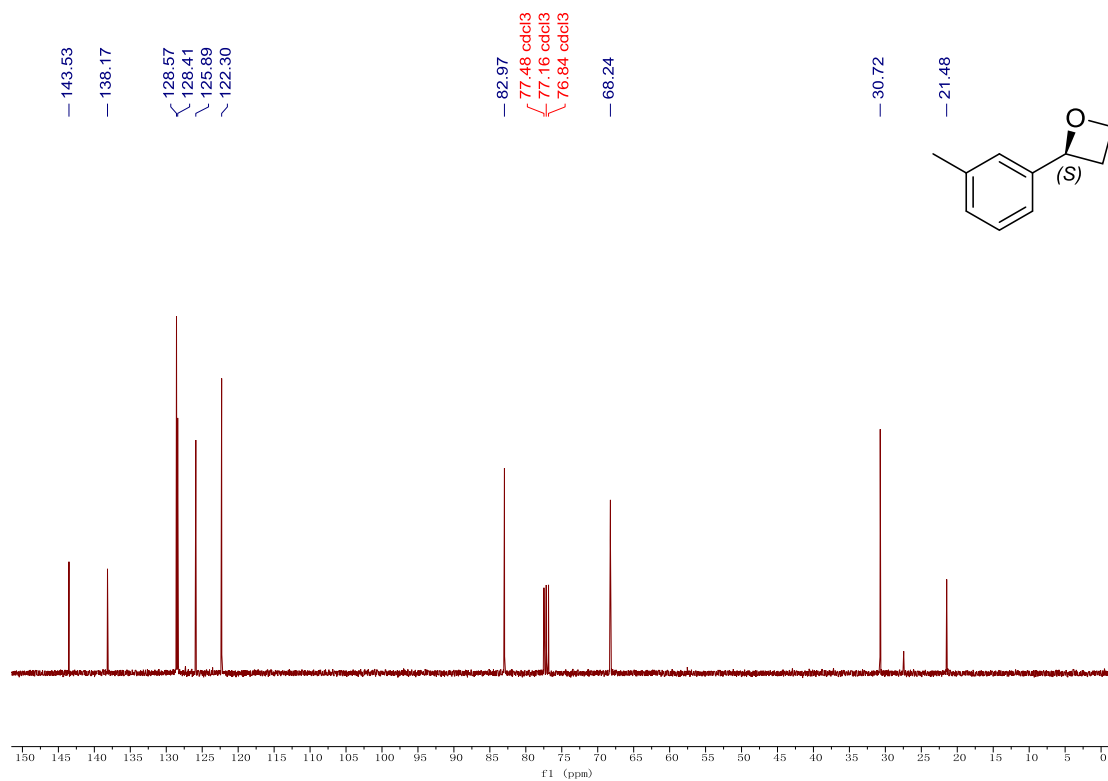



**(S)-2-(3-methoxyphenyl)oxetane [(S)-10b]**

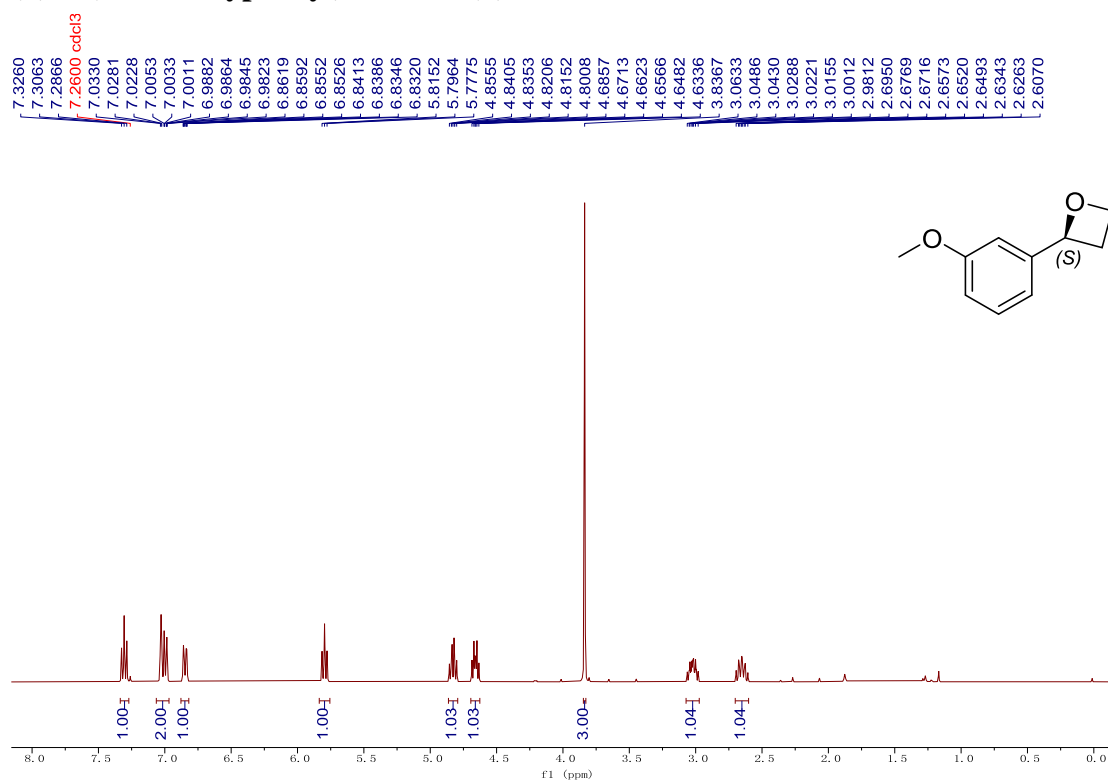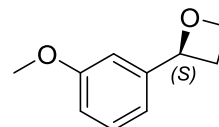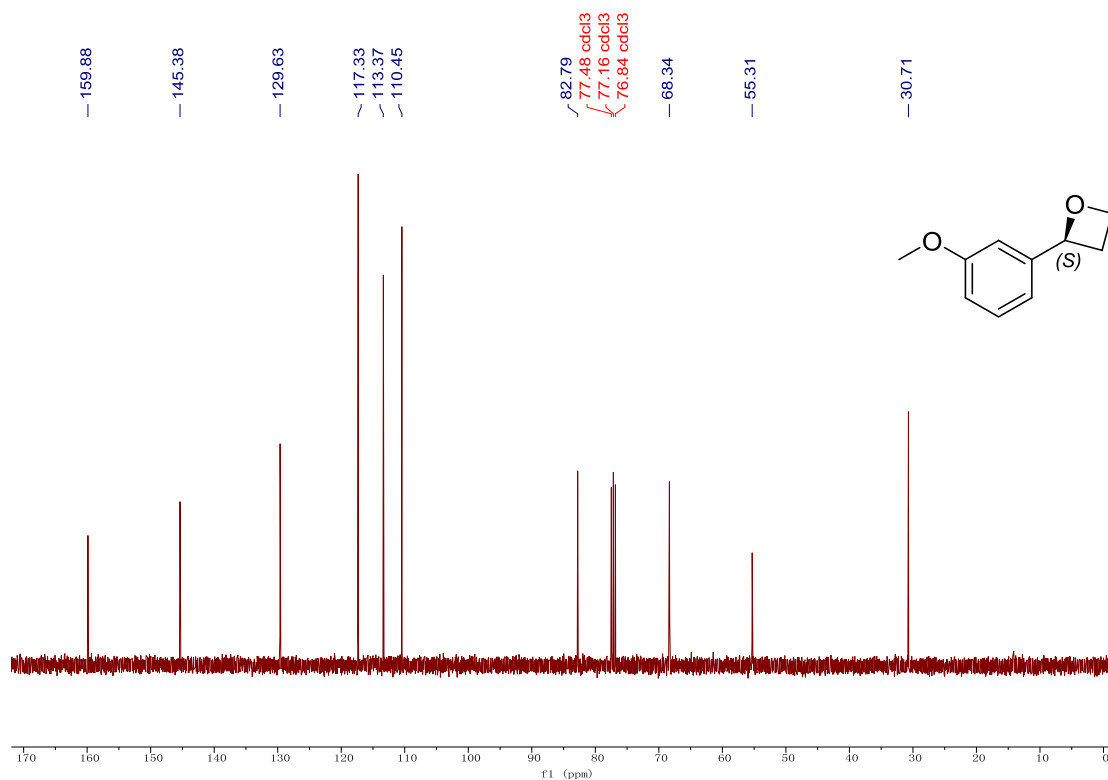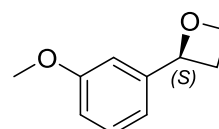

**(S)-2-(4-fluorophenyl)oxetane [(S)-11b]**

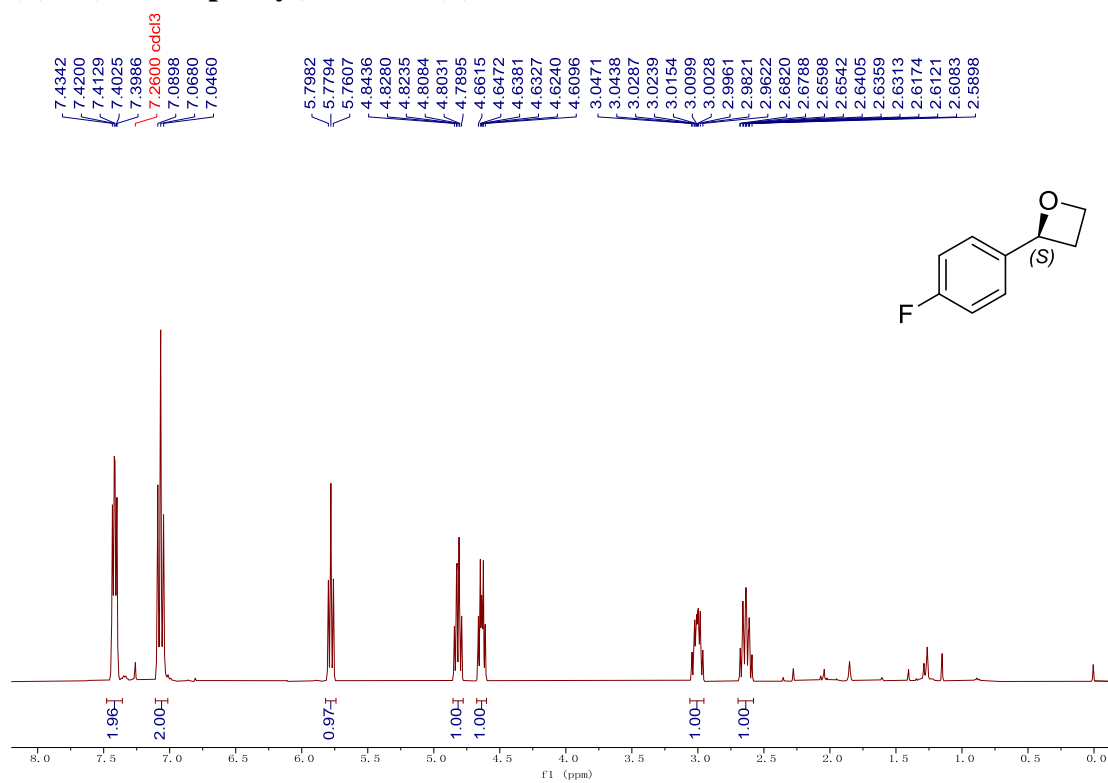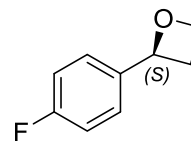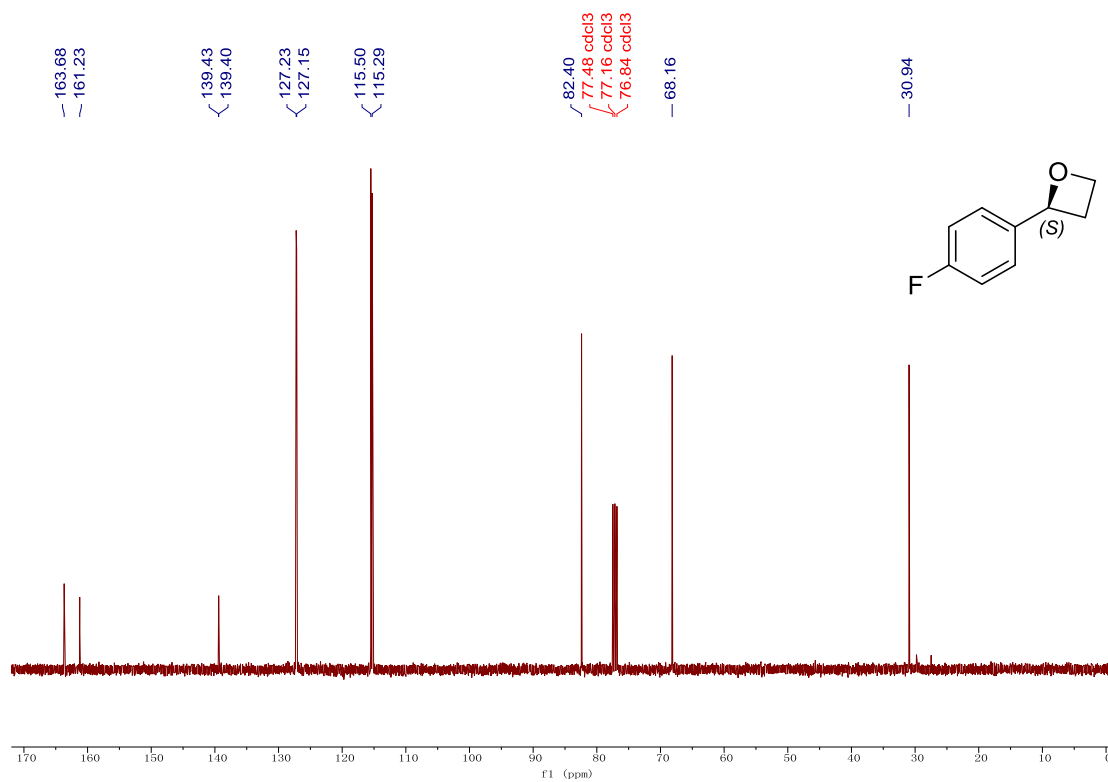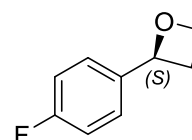

**(S)-2-(4-chlorophenyl)oxetane [(S)-12b]**

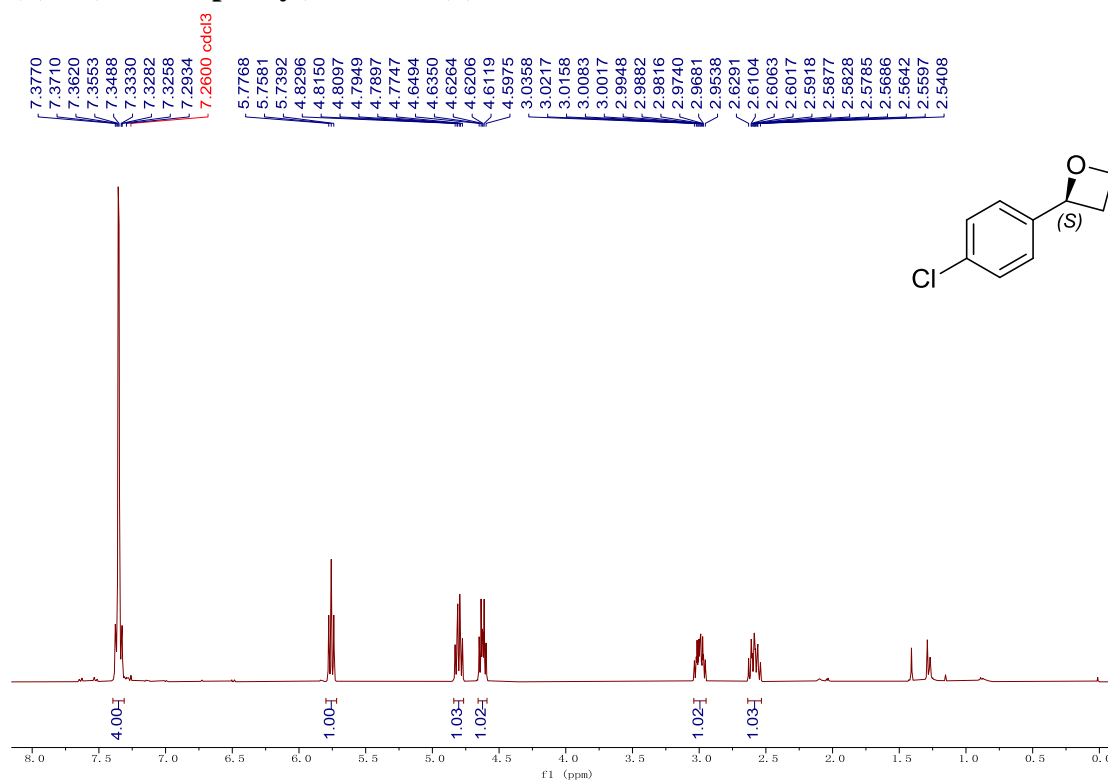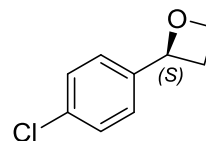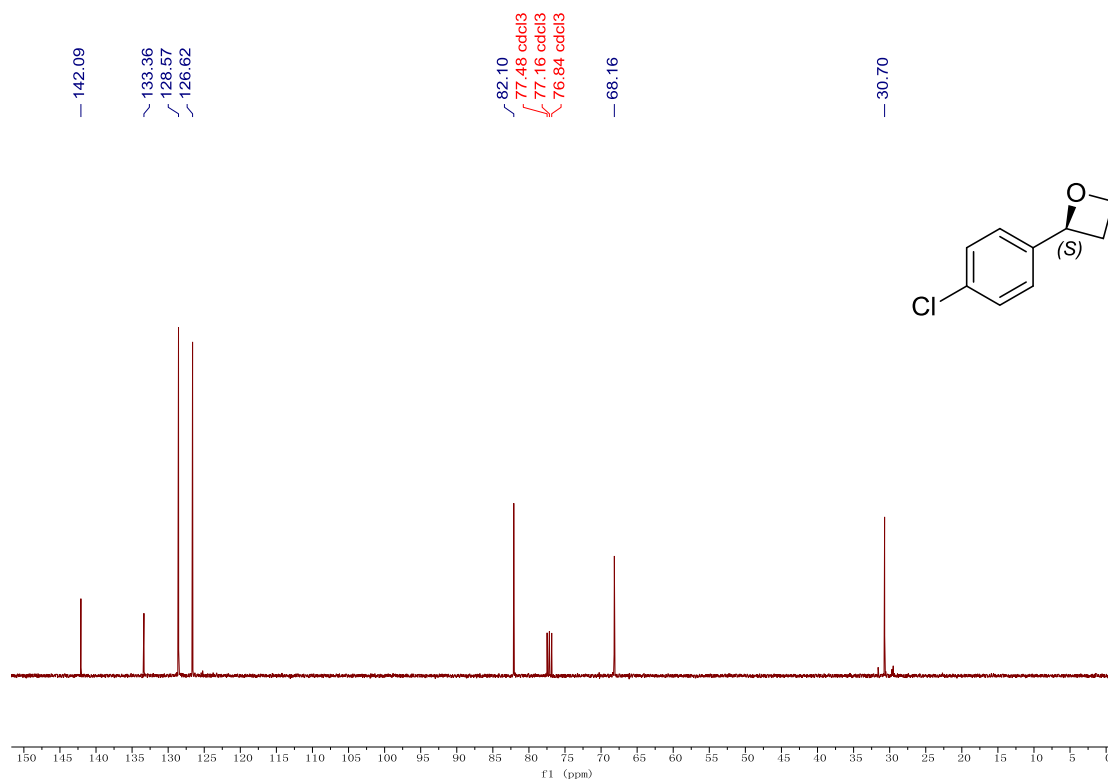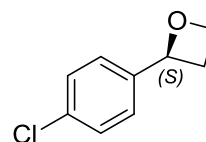

**(S)-2-(4-bromophenyl)oxetane [(S)-13b]**

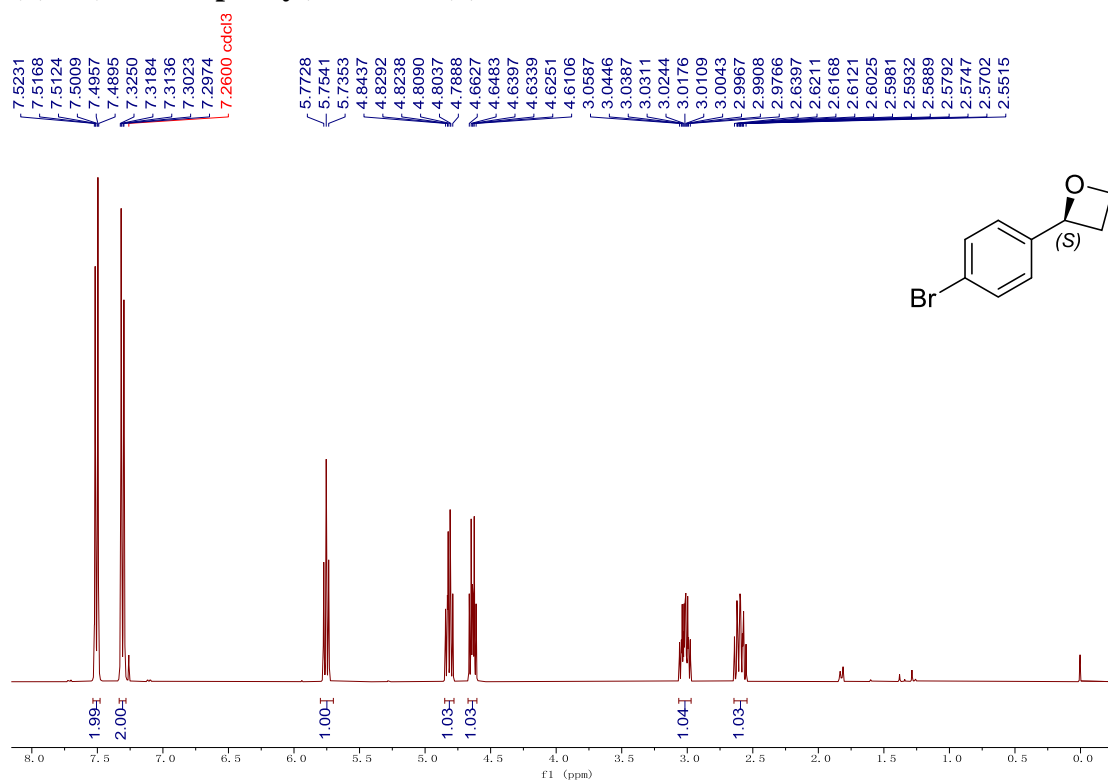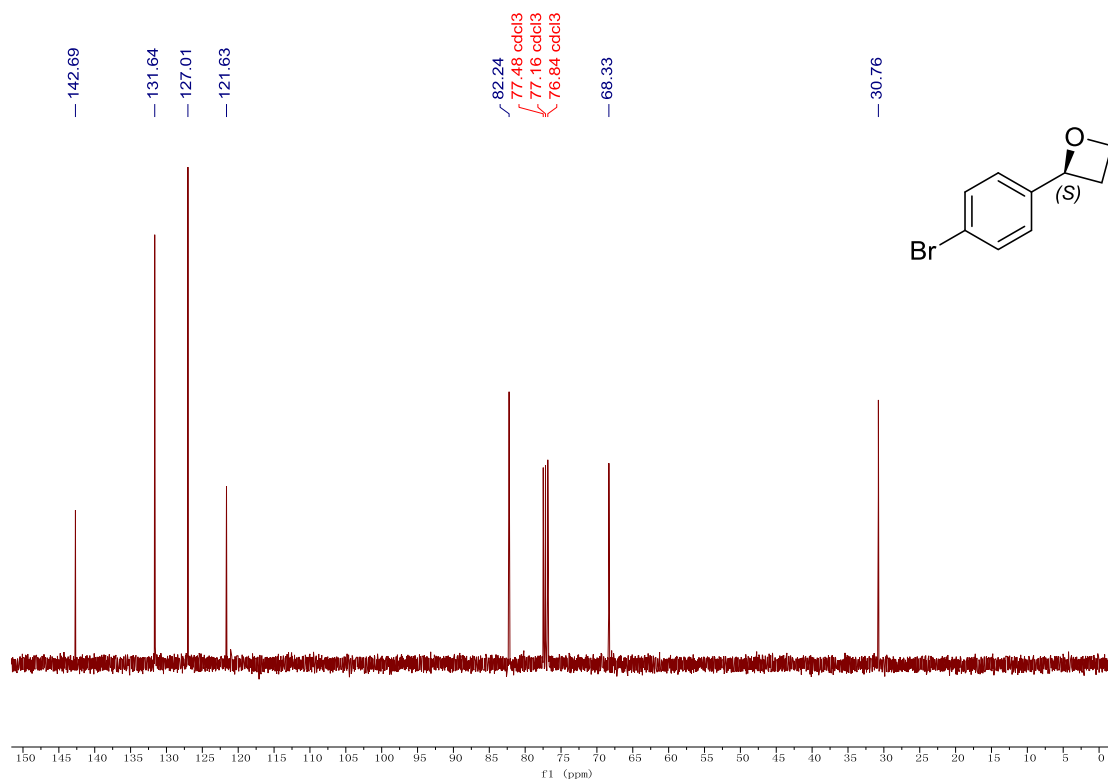

**(S)-2-(4-(trifluoromethyl)phenyl)oxetane [(S)-14b]**

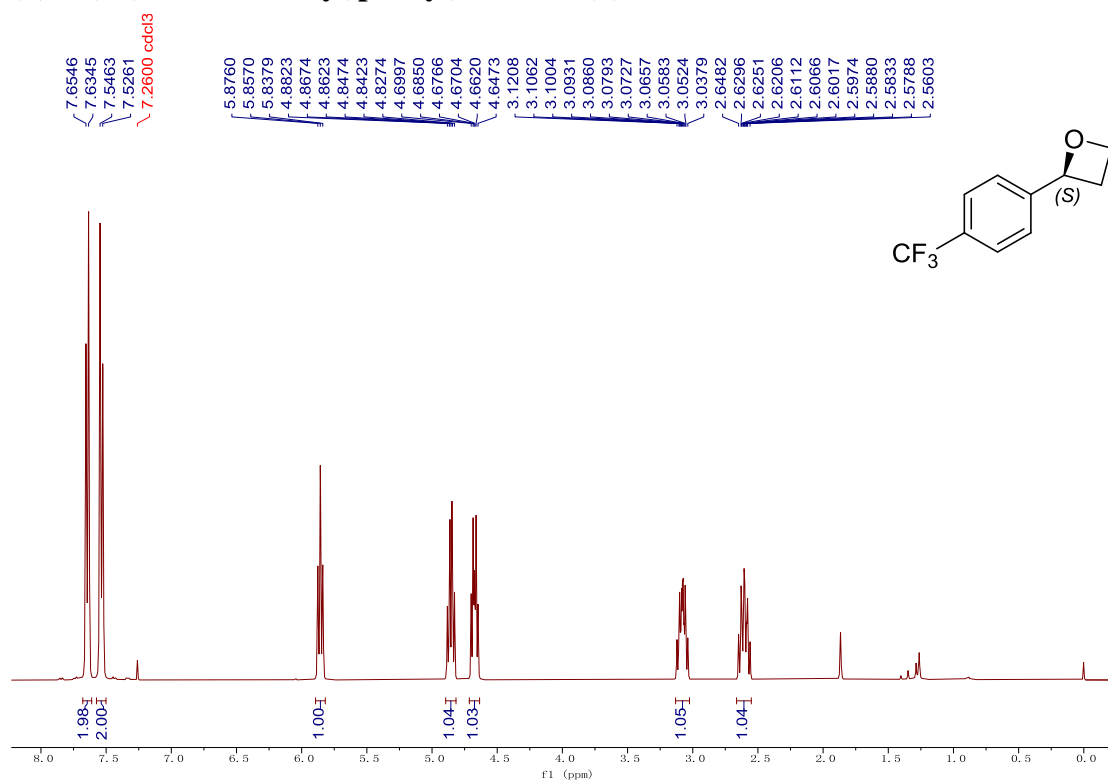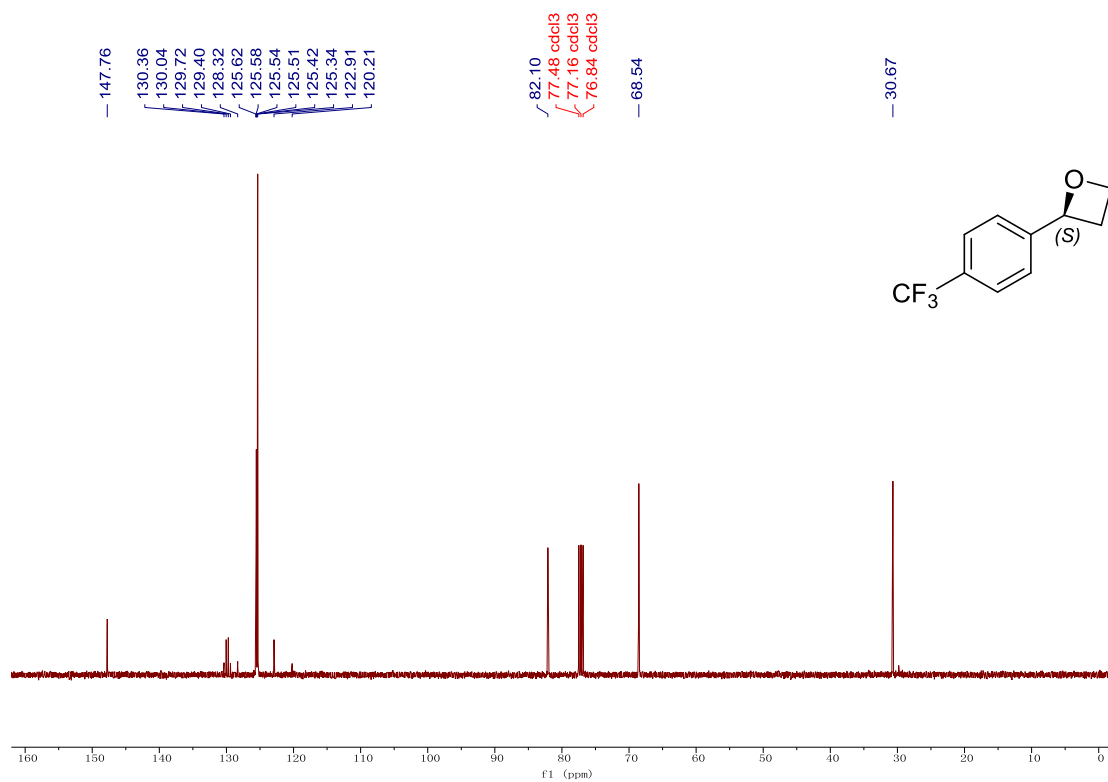

**(S)-2-(3,5-difluorophenyl)oxetane [(S)-15b]**

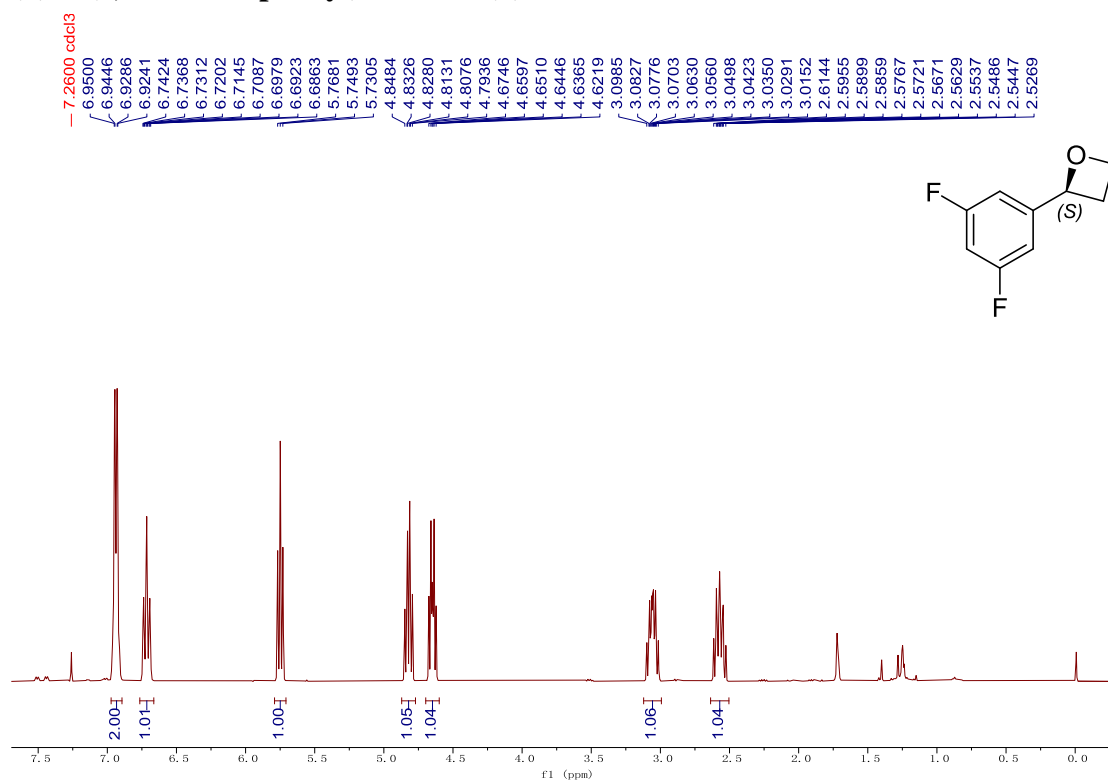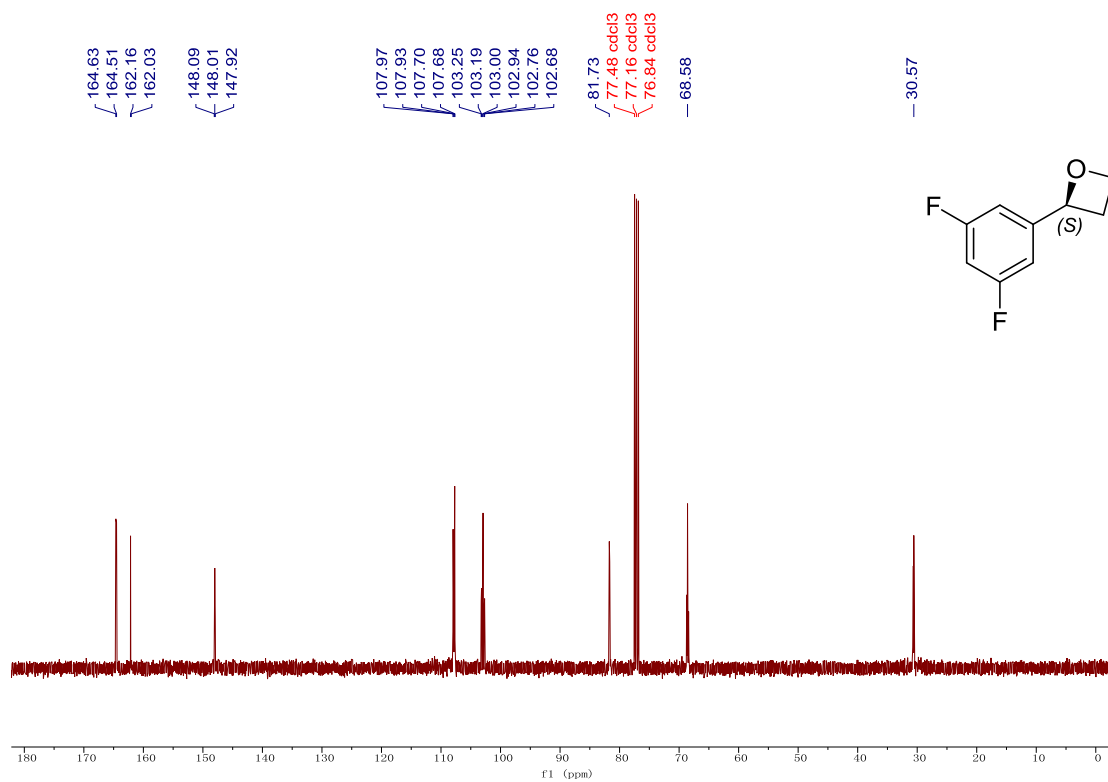

**(S)-2-(naphthalen-2-yl)oxetane [(S)-16b]**

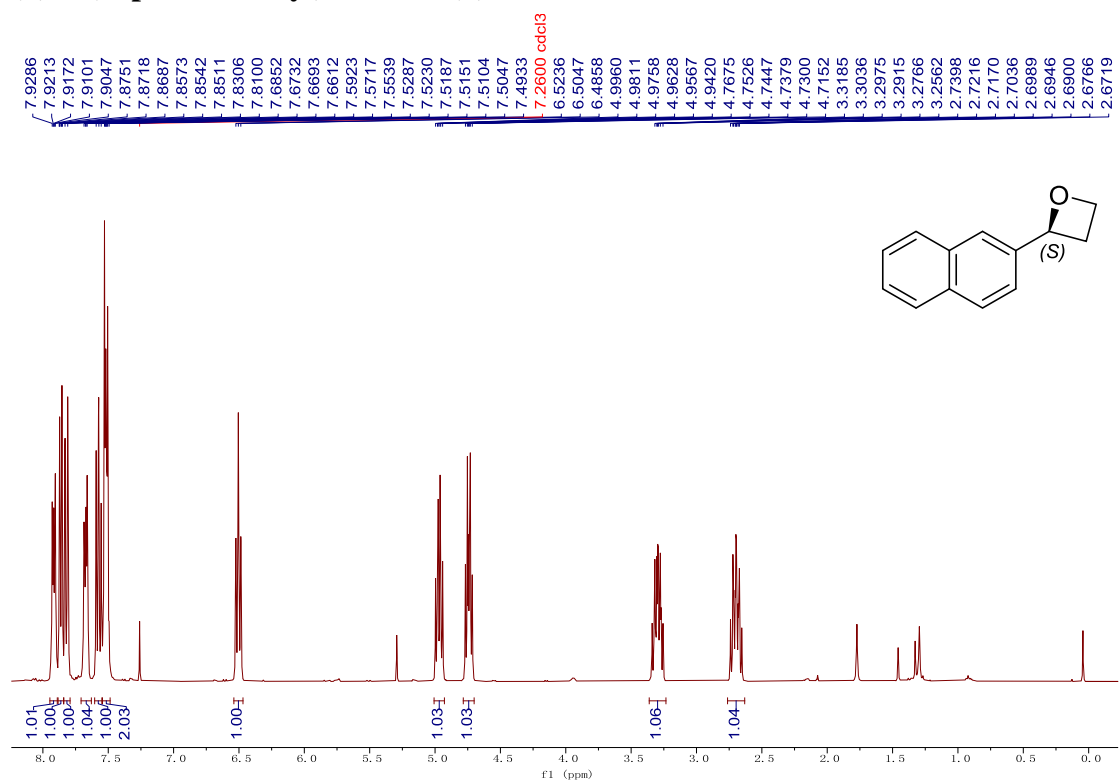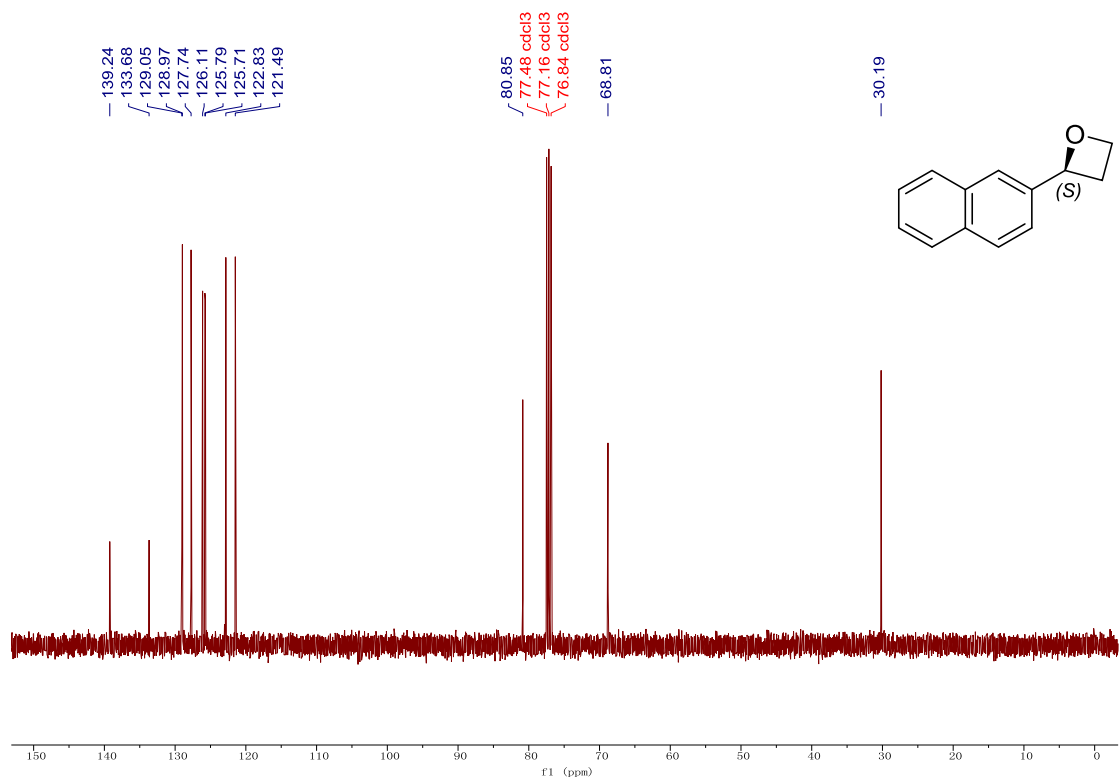

**(S)-2-methyl-2-phenyloxetane [(S)-17b]**

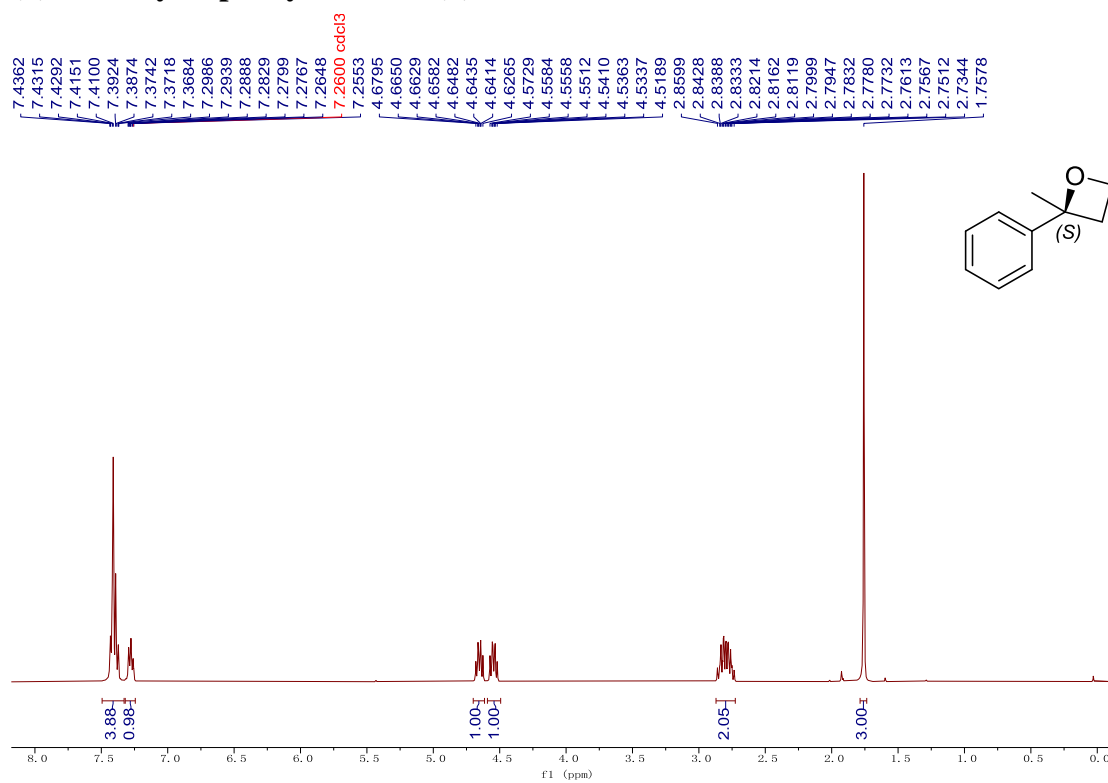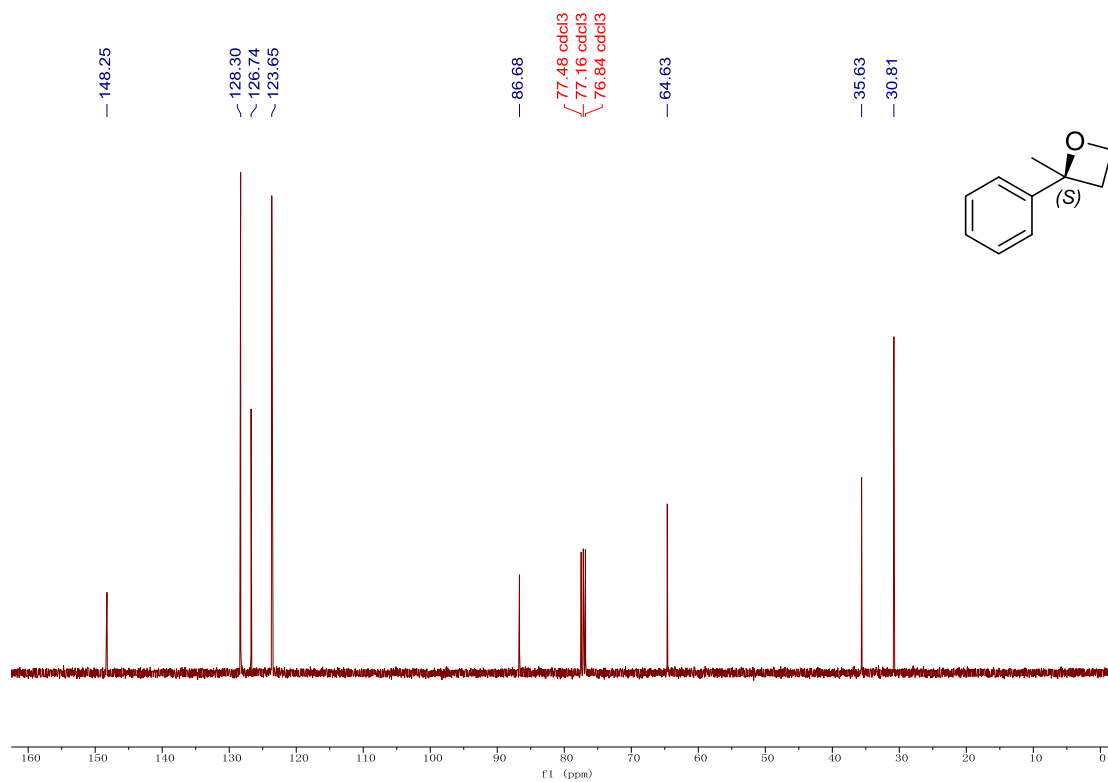



**(S)-3-bromo-5-(oxetan-2-yl)pyridine [(S)-18b]**

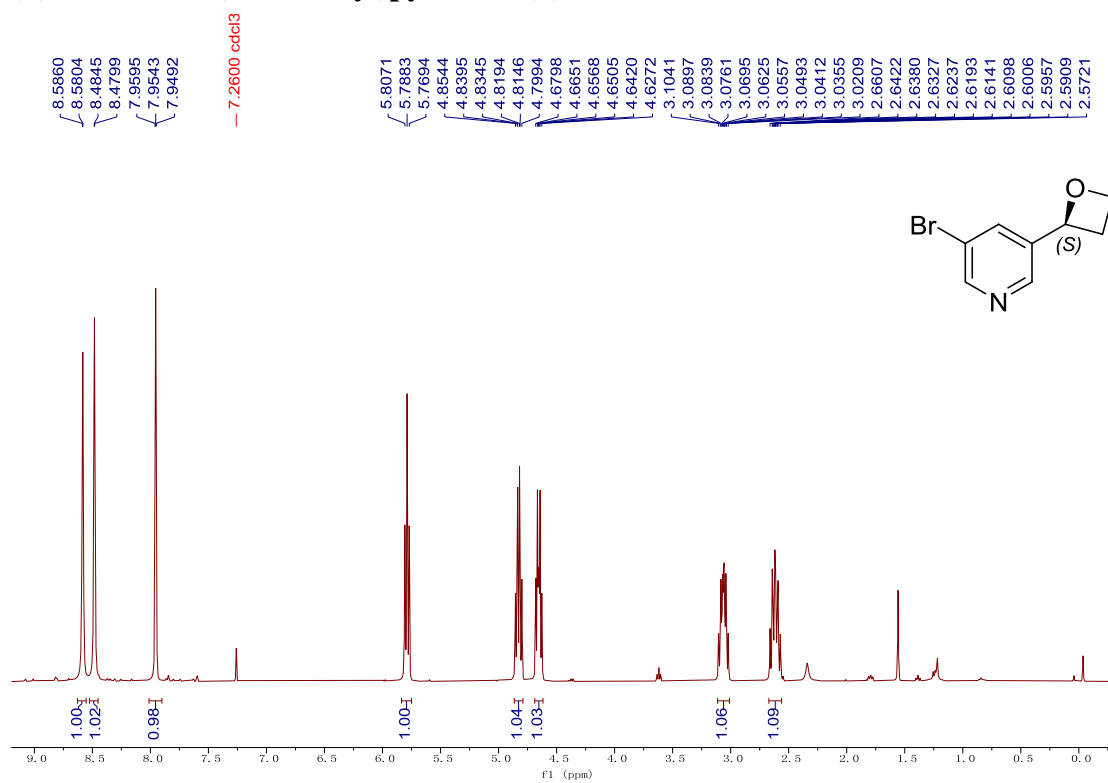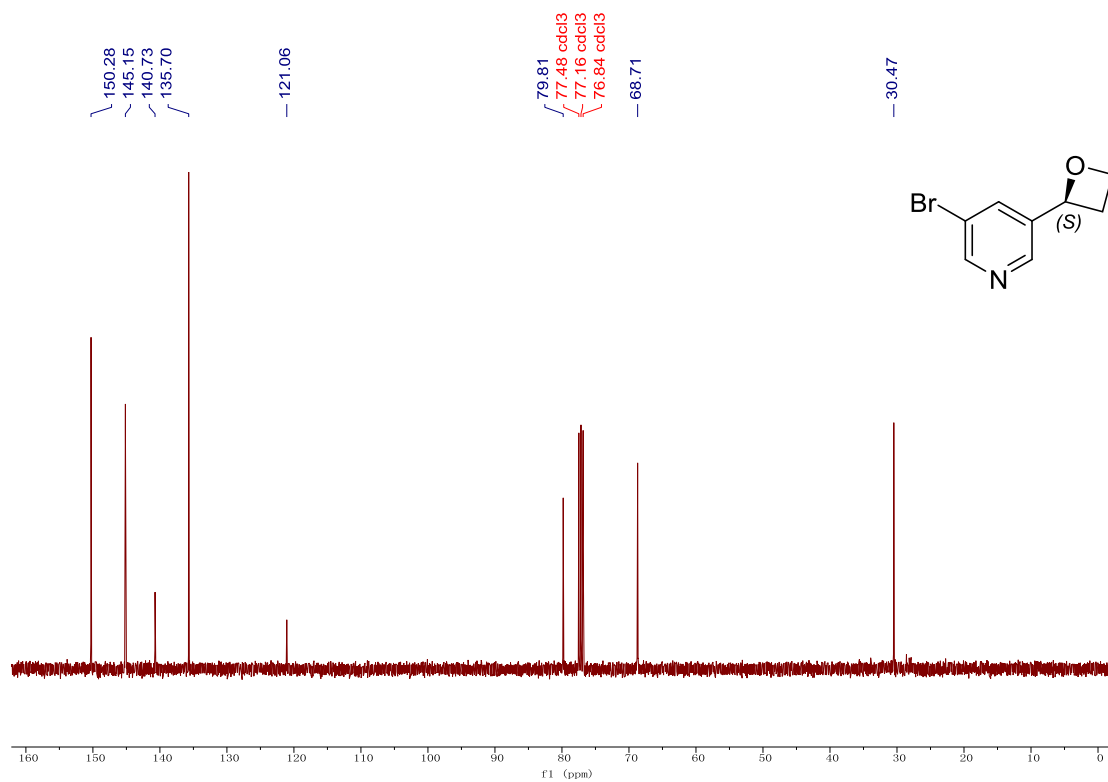

**(S)-3-(oxetan-2-yl)quinoline [(S)-19b]**

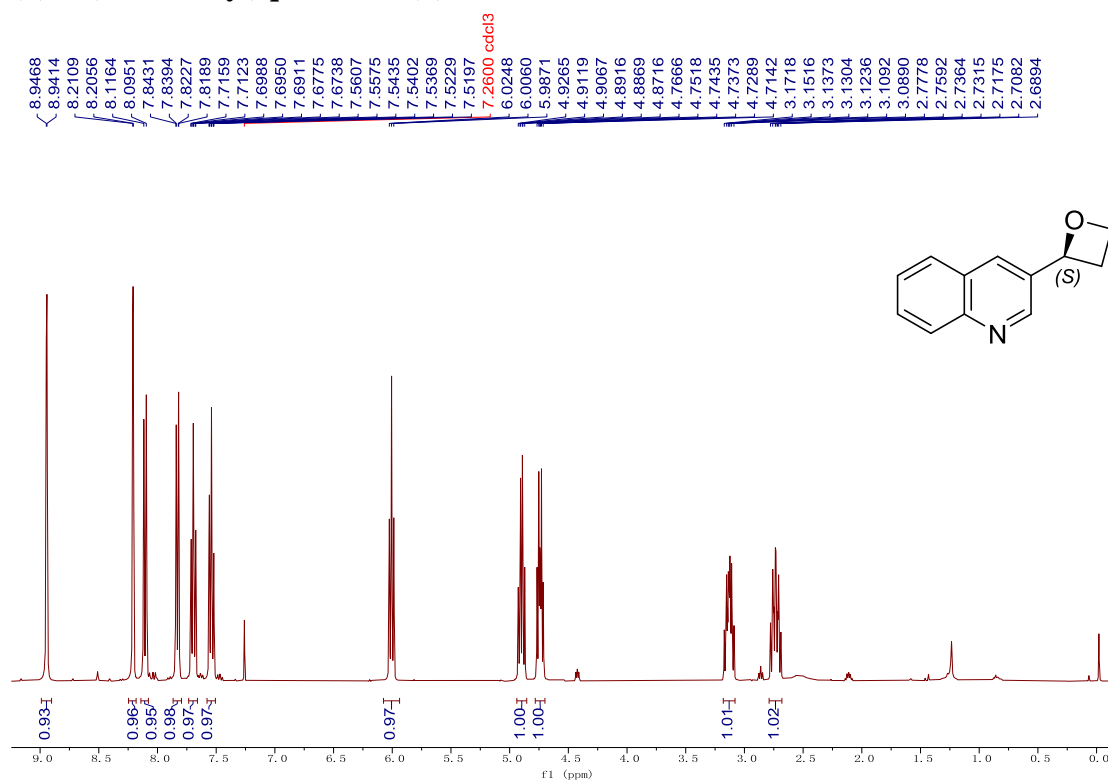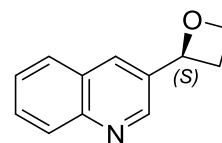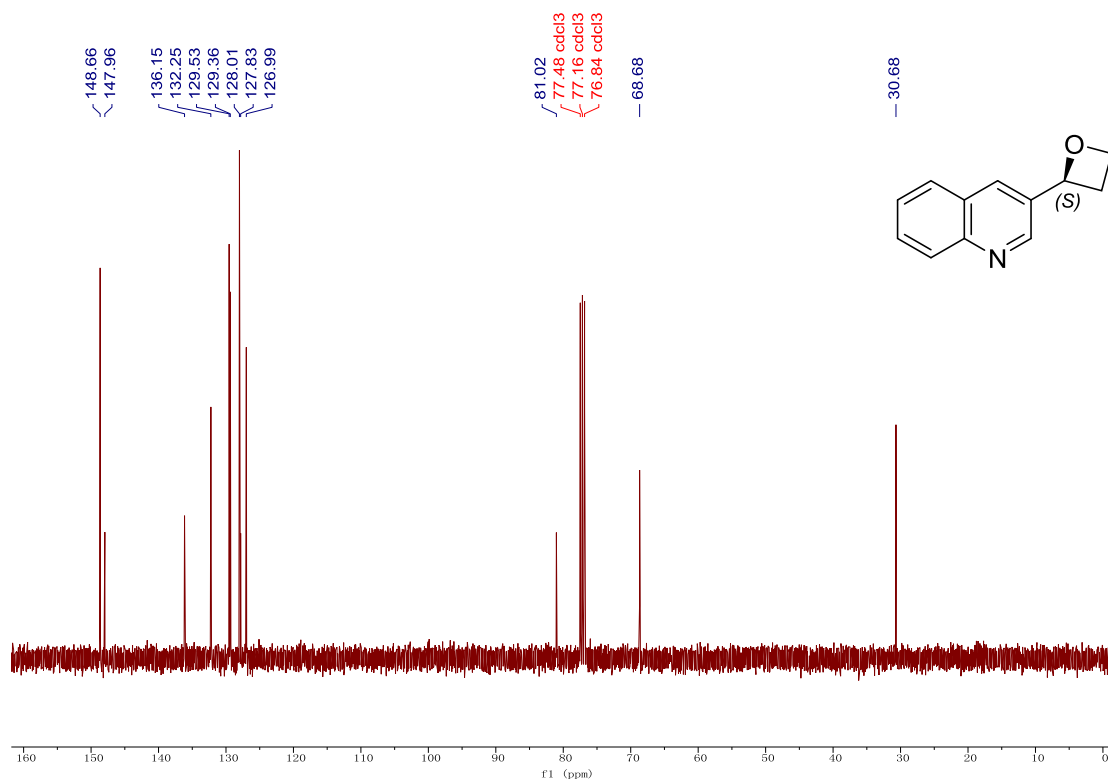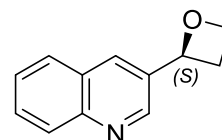

**(S)-2-cyclohexyloxetane [(S)-21b]**

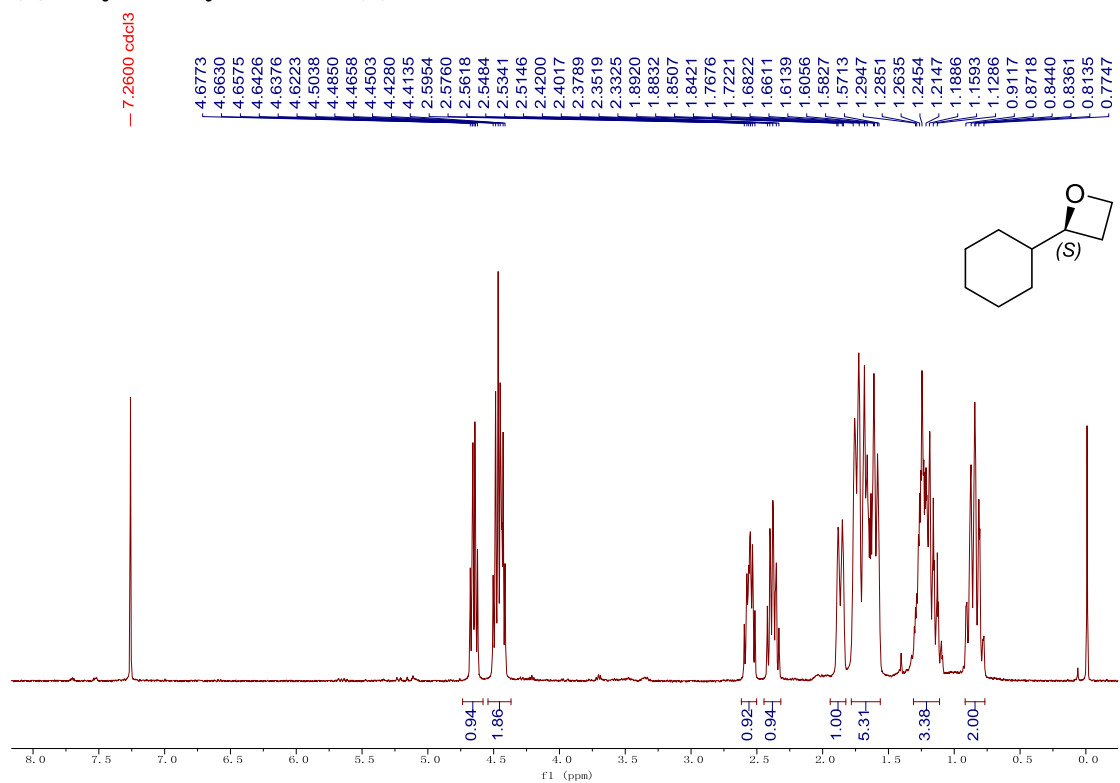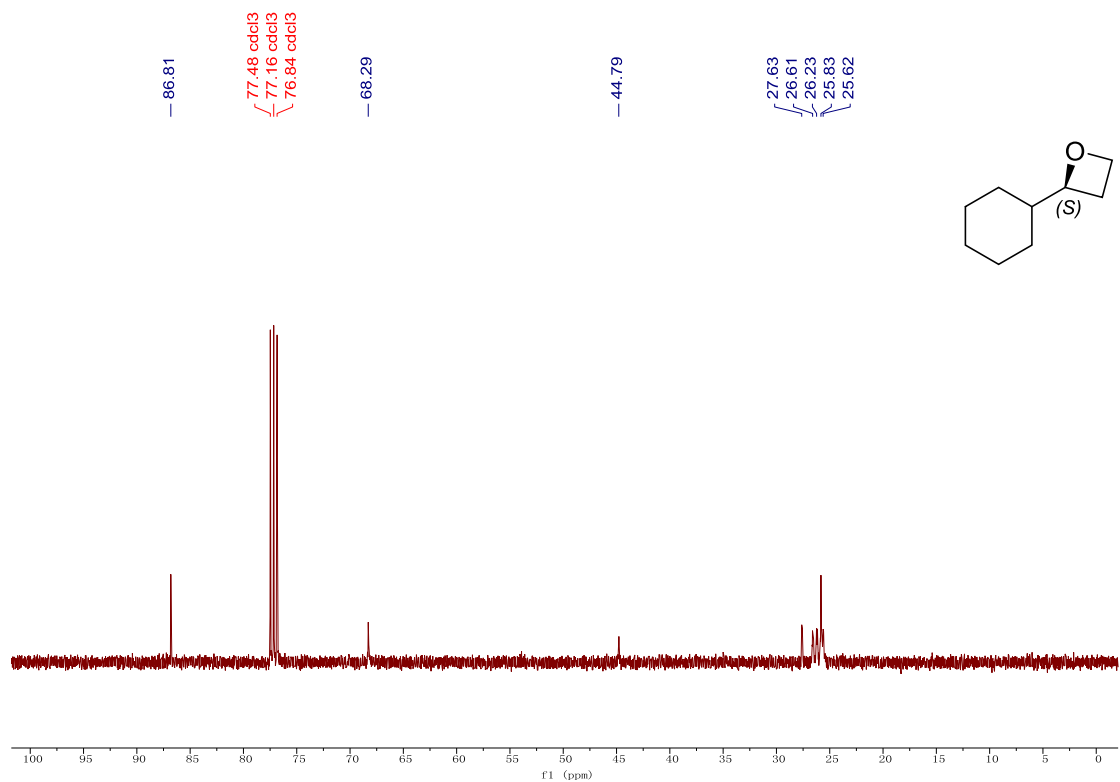

**(R)-3-azido-1-phenylpropan-1-ol [(R)-1c]**

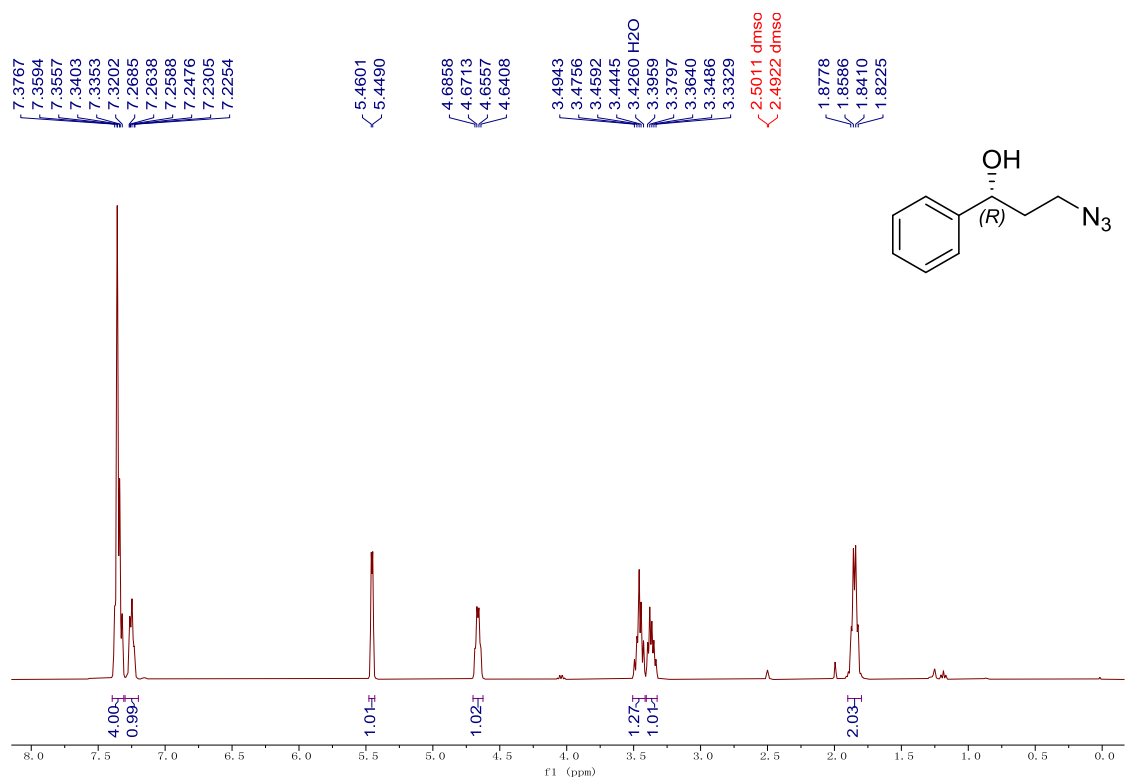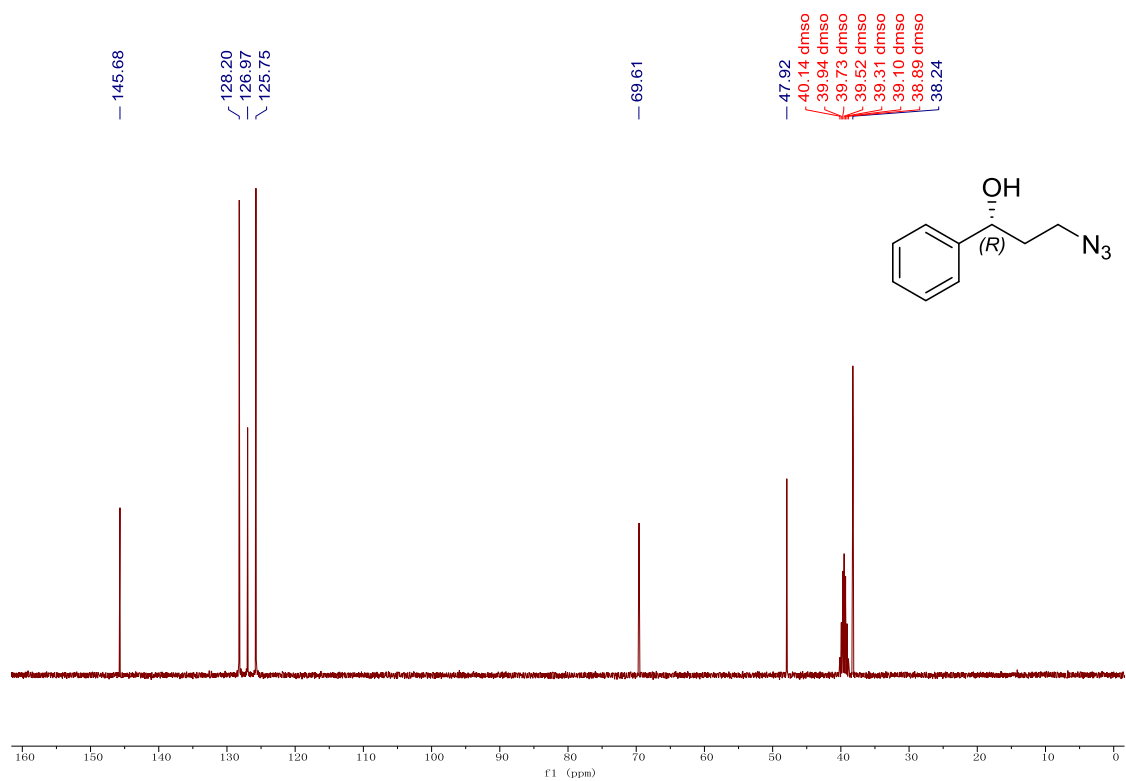

**(R)-3-azido-1-(2-fluorophenyl)propan-1-ol [(R)-2c]**

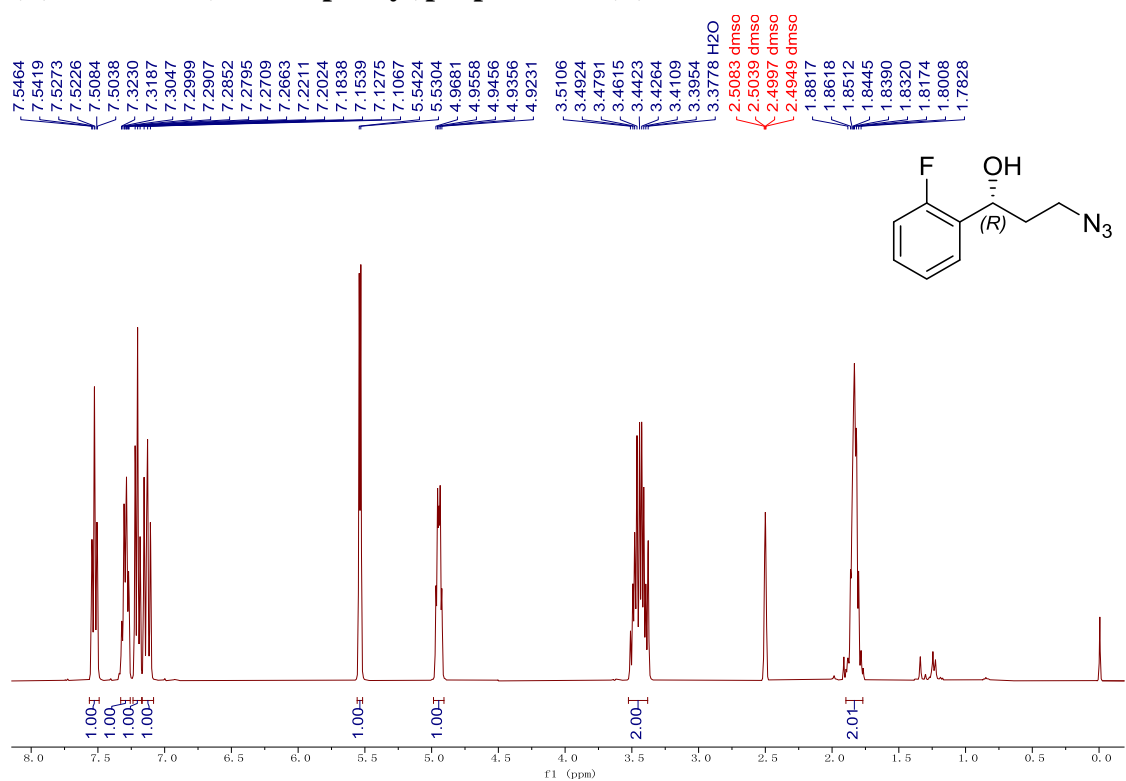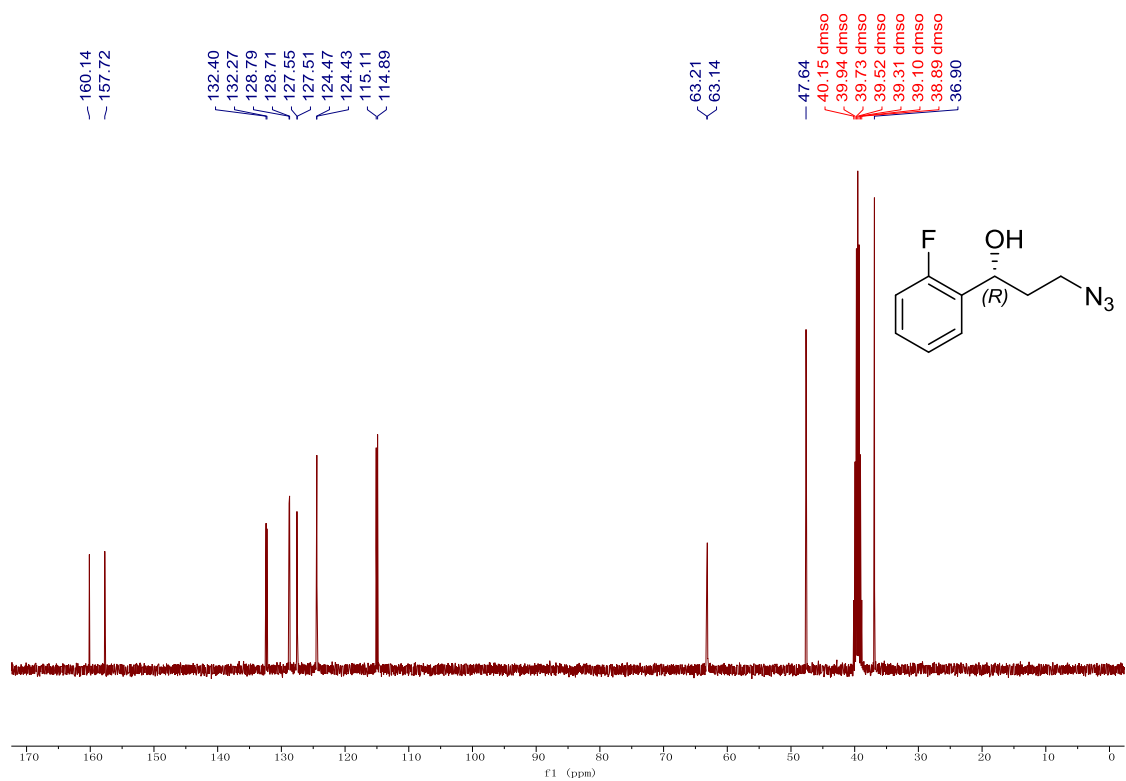

**(R)-3-azido-1-(2-chlorophenyl)propan-1-ol [(R)-3c]**

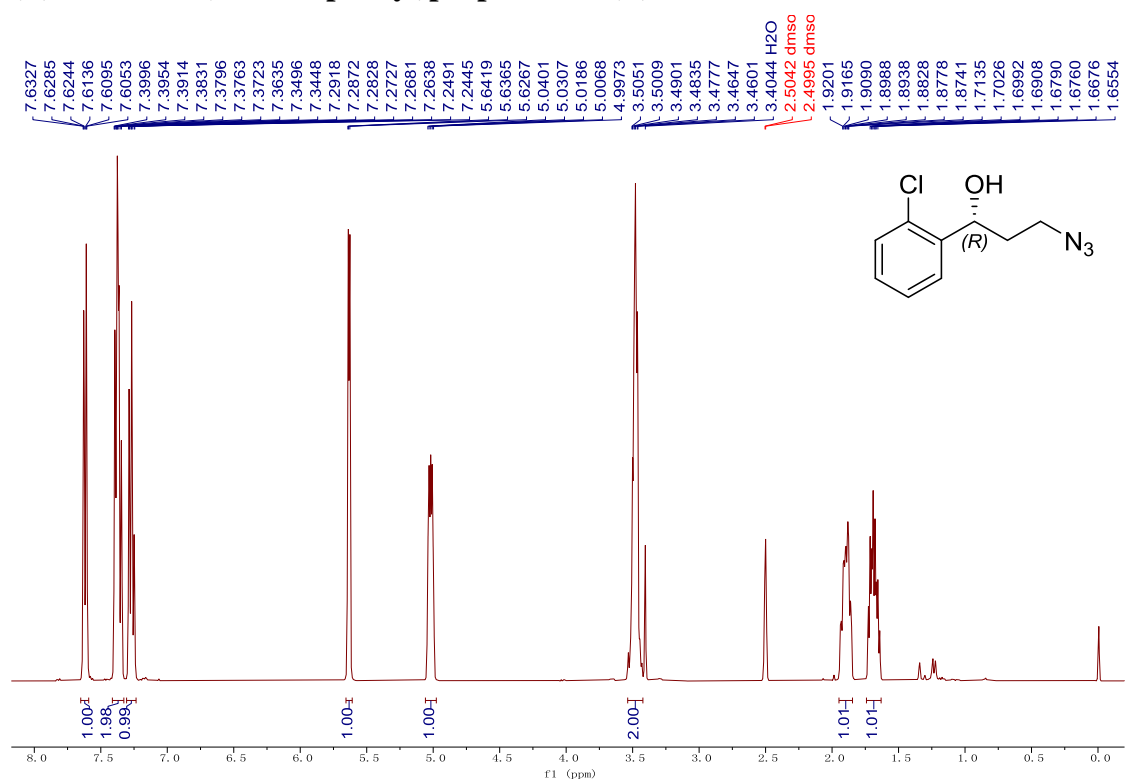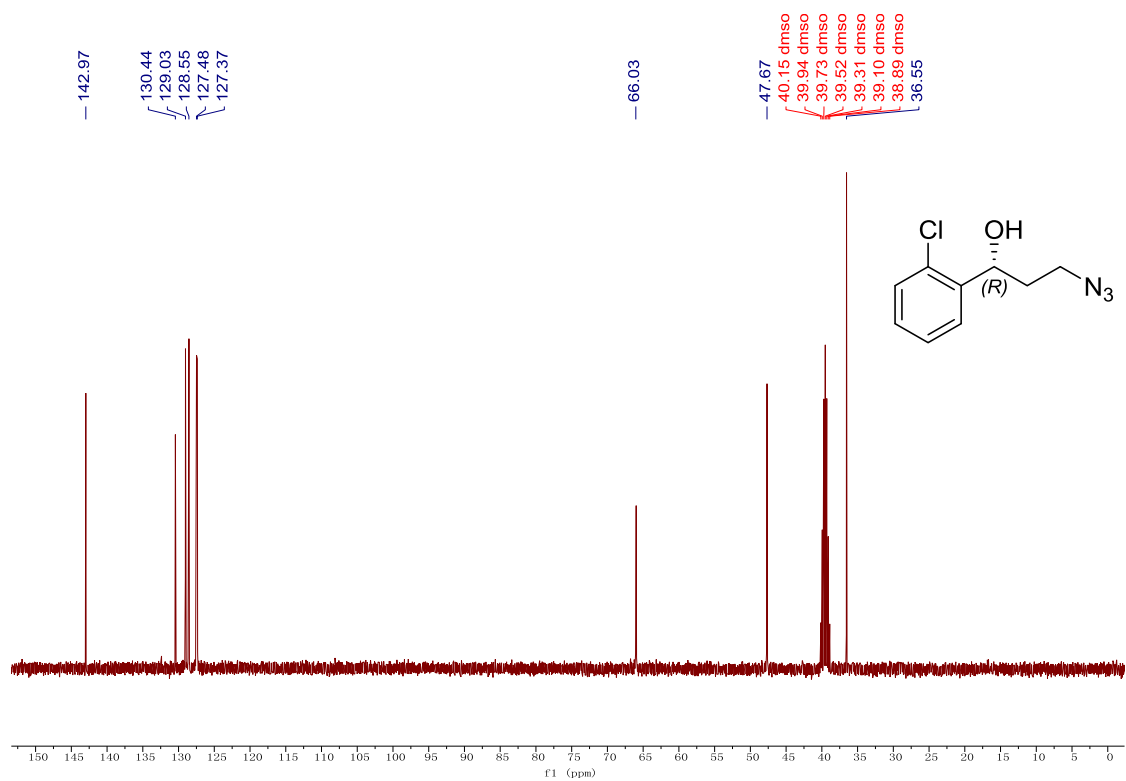

**(*R*)-3-azido-1-(2-bromophenyl)propan-1-ol [(*R*)-4c]**

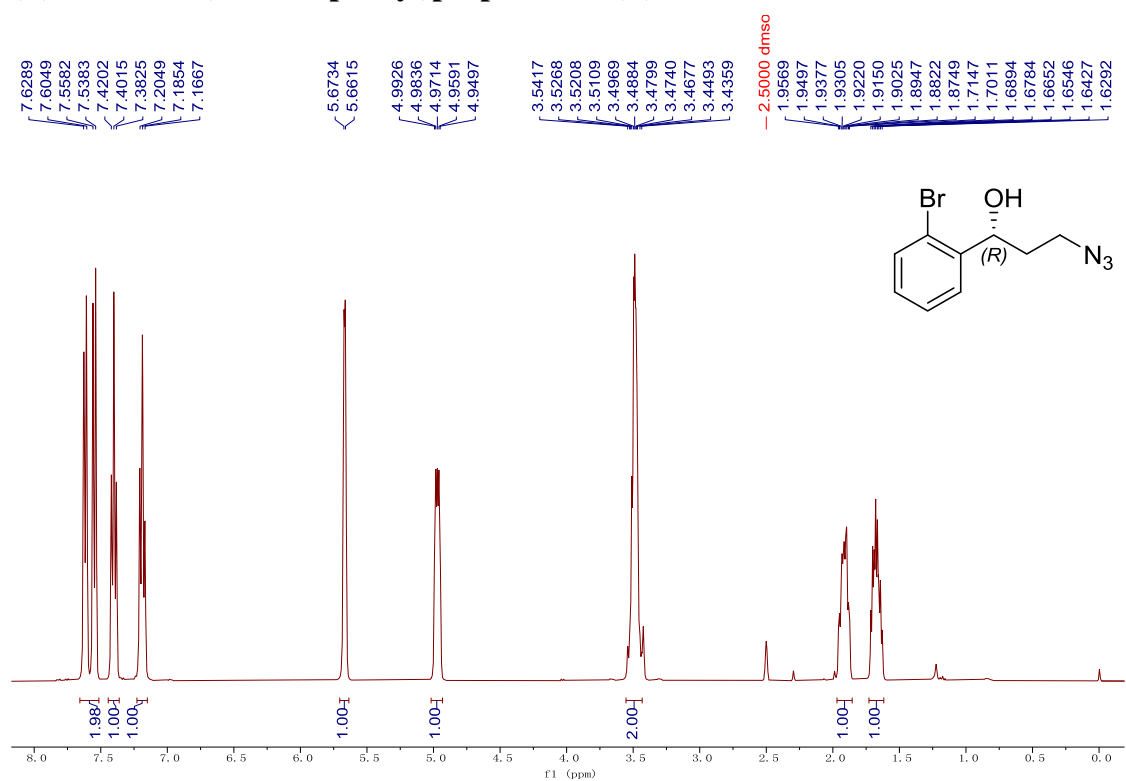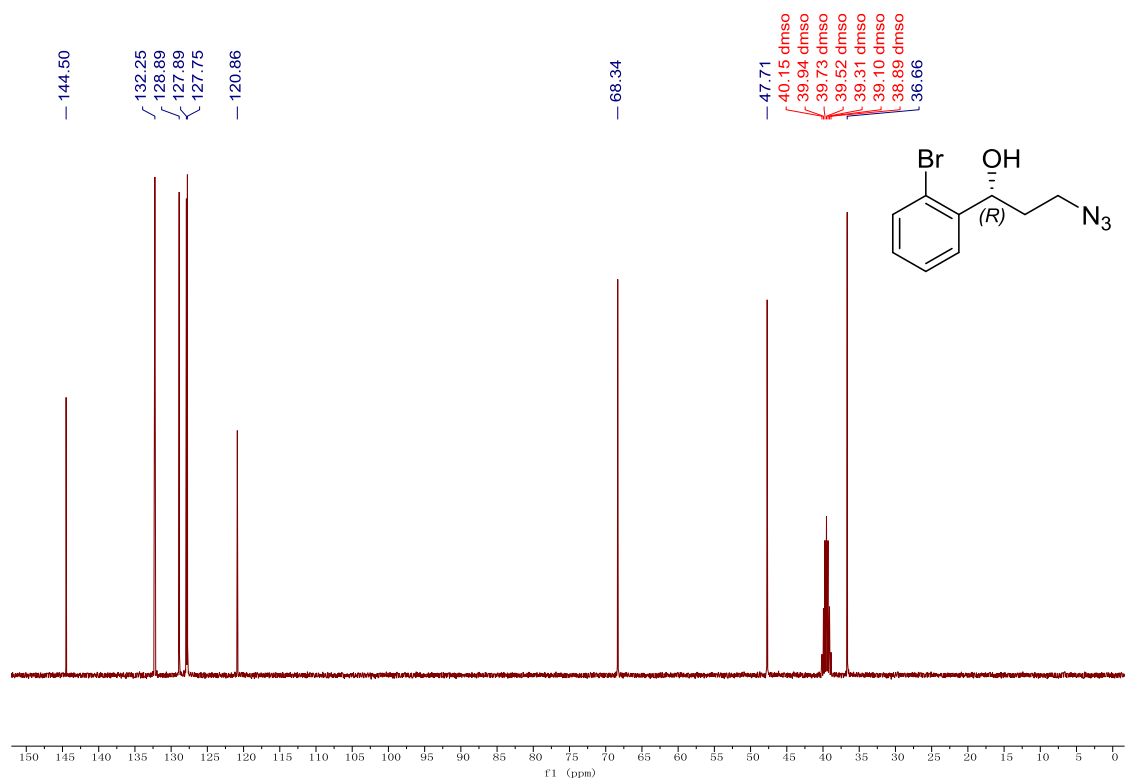

**(R)-3-azido-1-(o-tolyl)propan-1-ol [(R)-5c]**

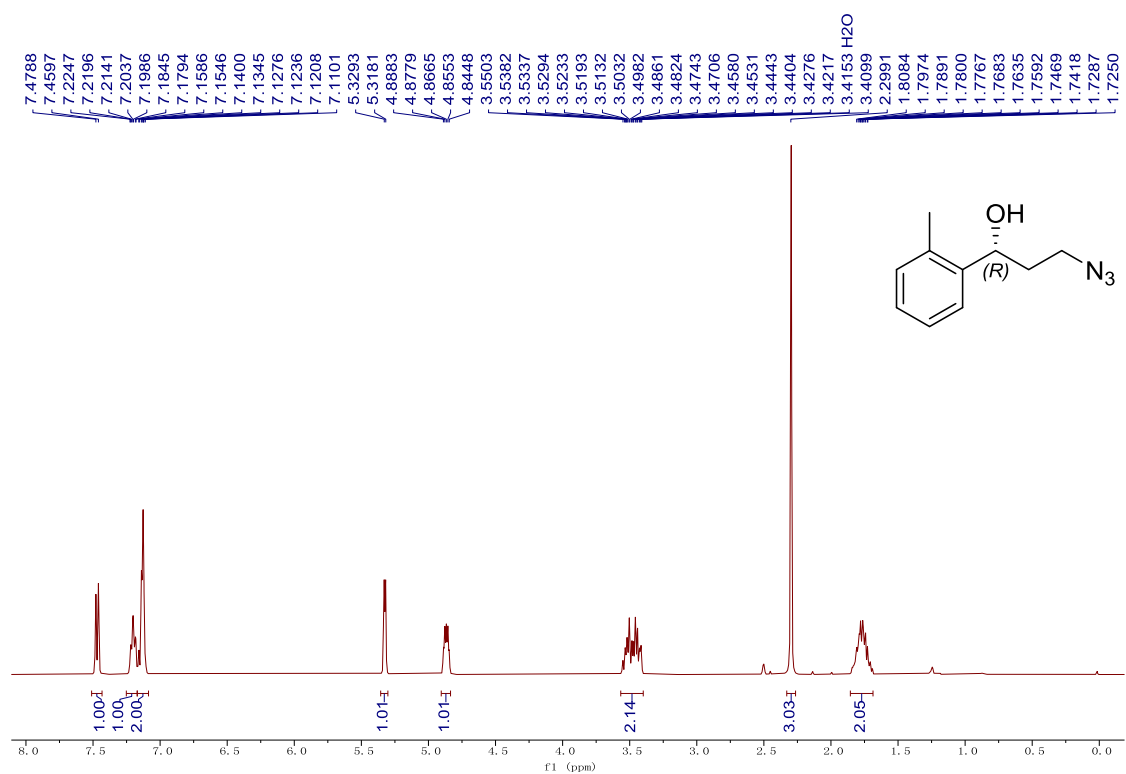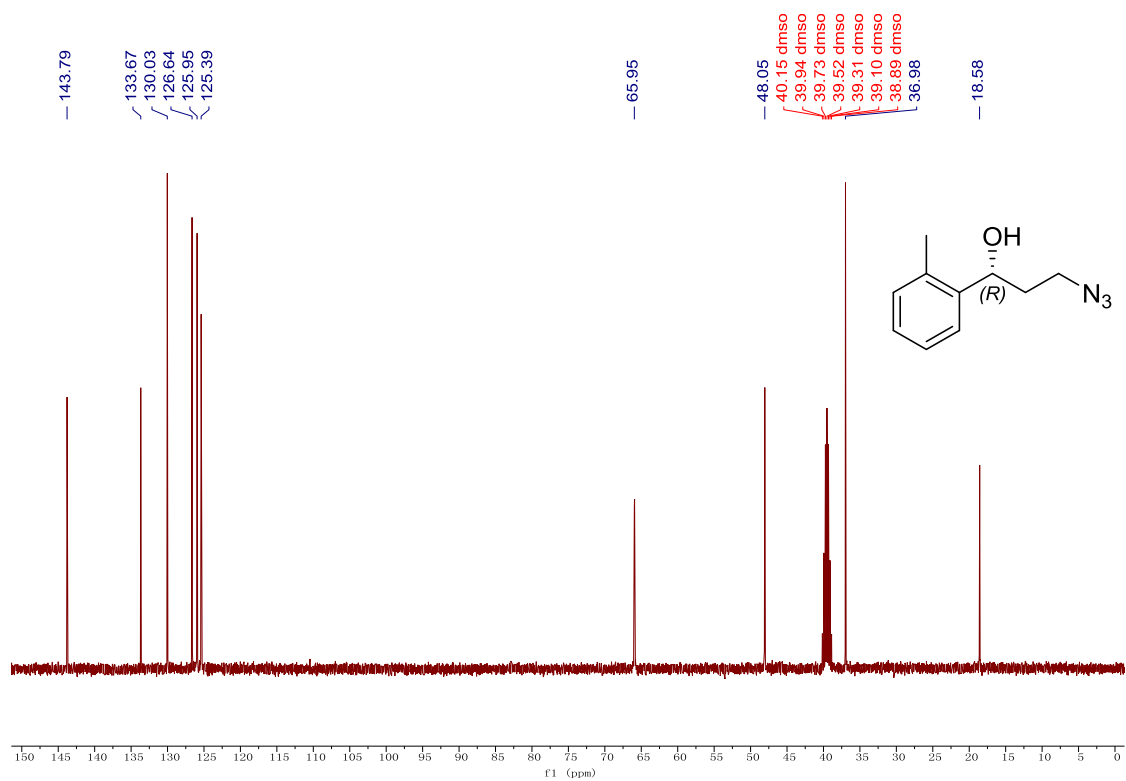



**(*R*)-3-azido-1-(3-fluorophenyl)propan-1-ol [(*R*)-6c]**

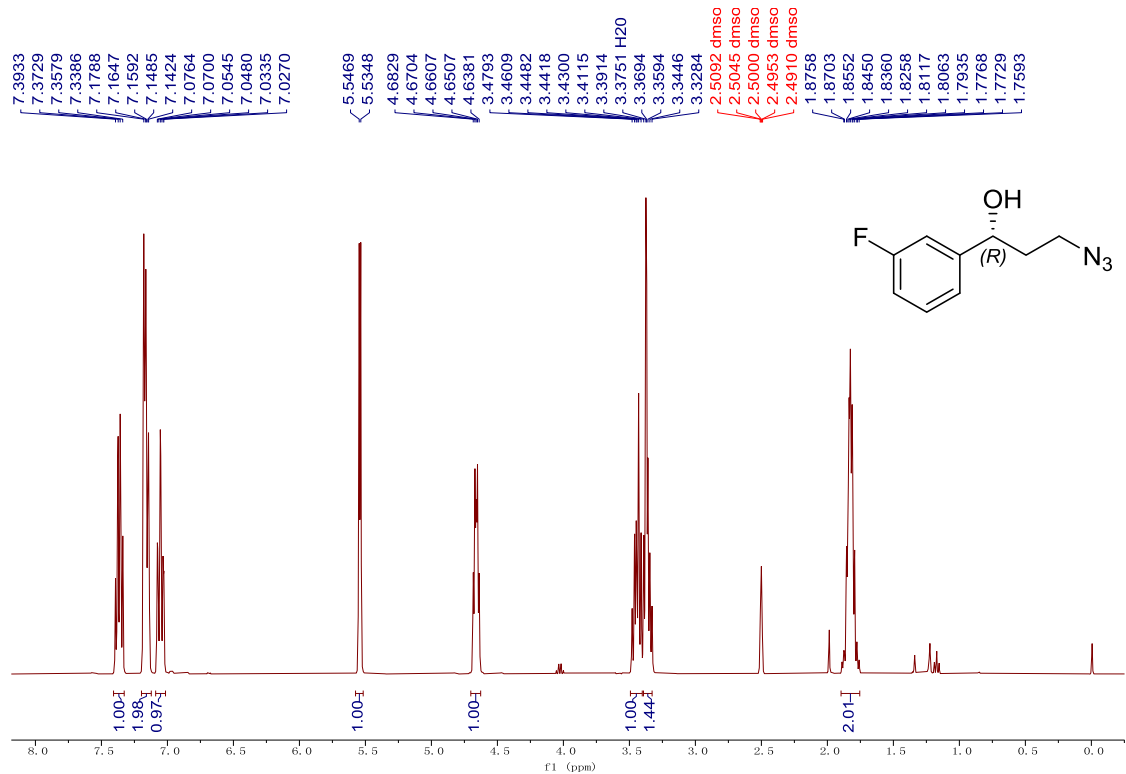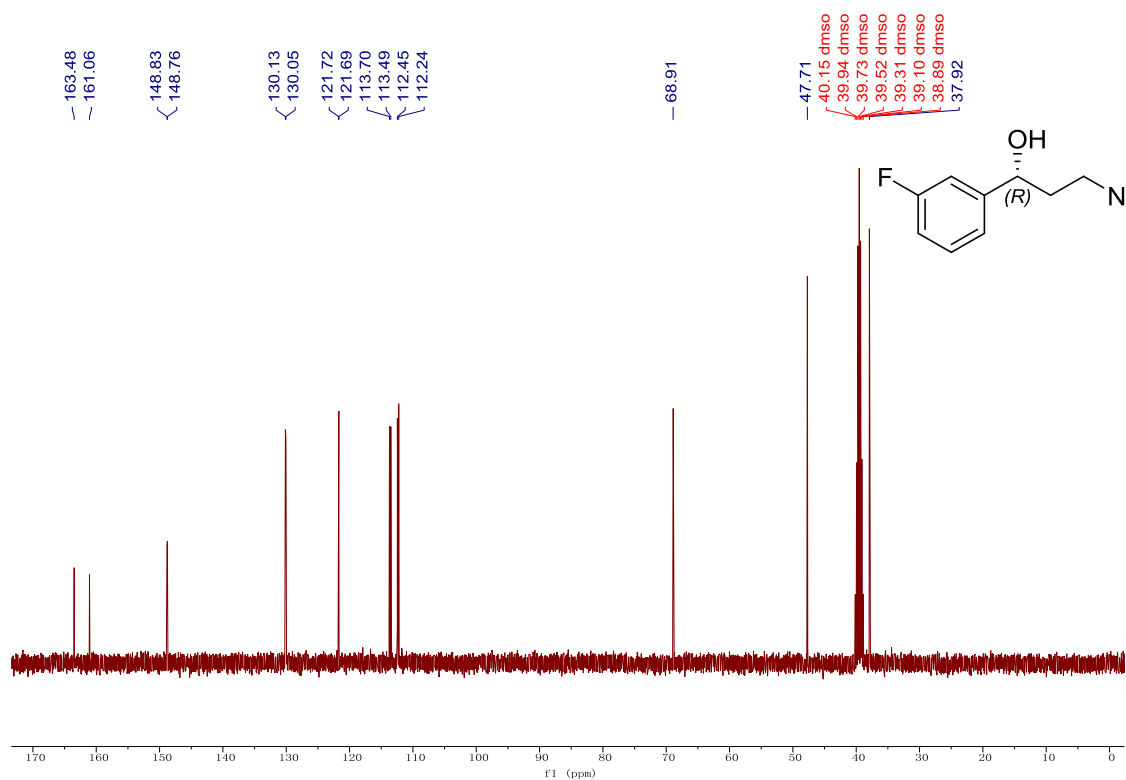

**(R)-3-azido-1-(3-chlorophenyl)propan-1-ol [(R)-7c]**

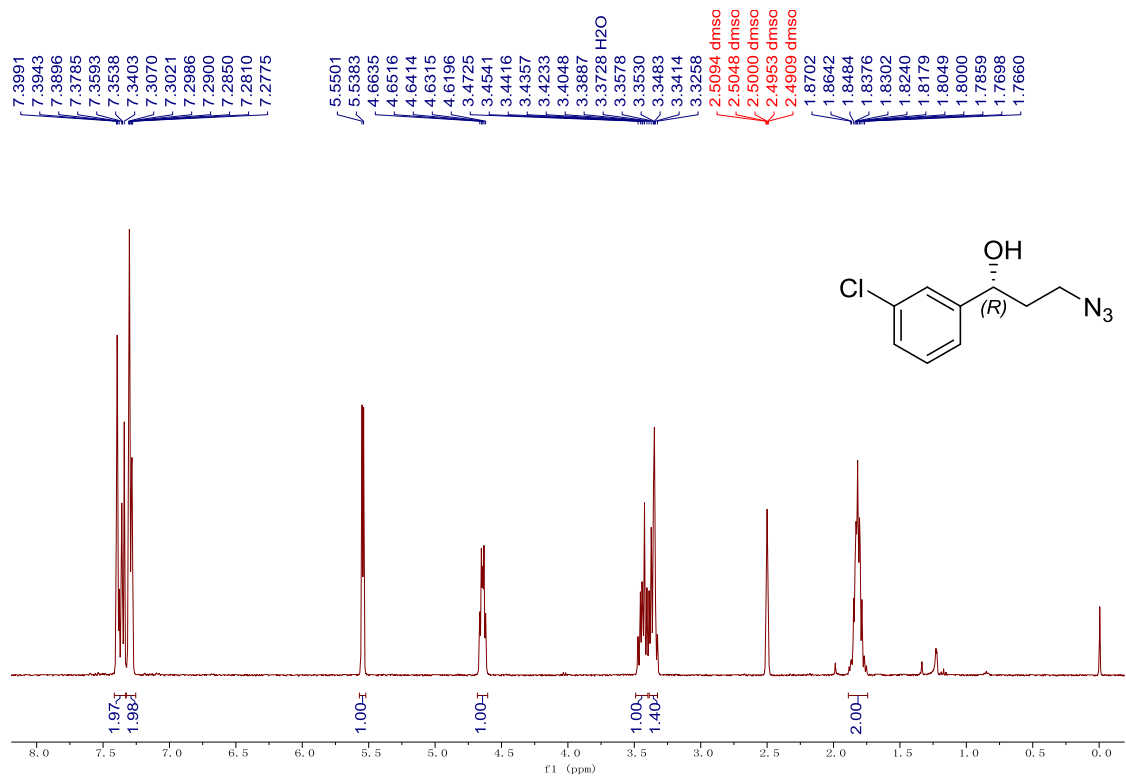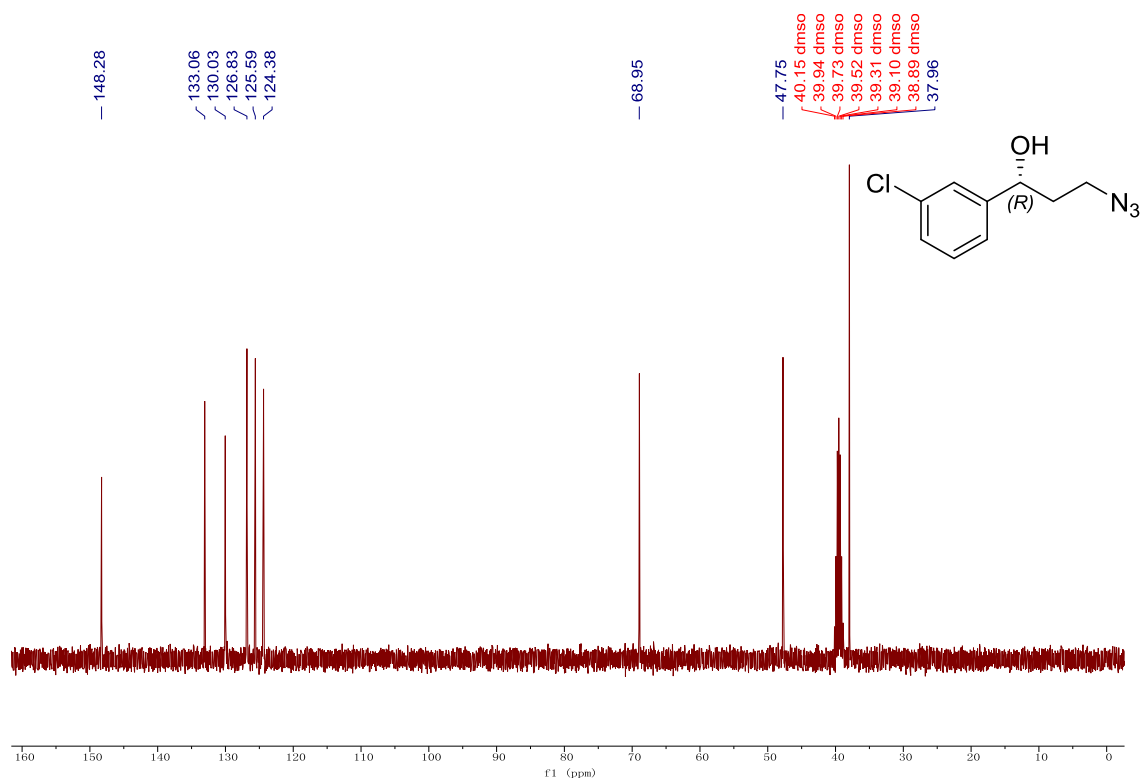

**(R)-3-azido-1-(3-bromophenyl)propan-1-ol [(R)-8c]**

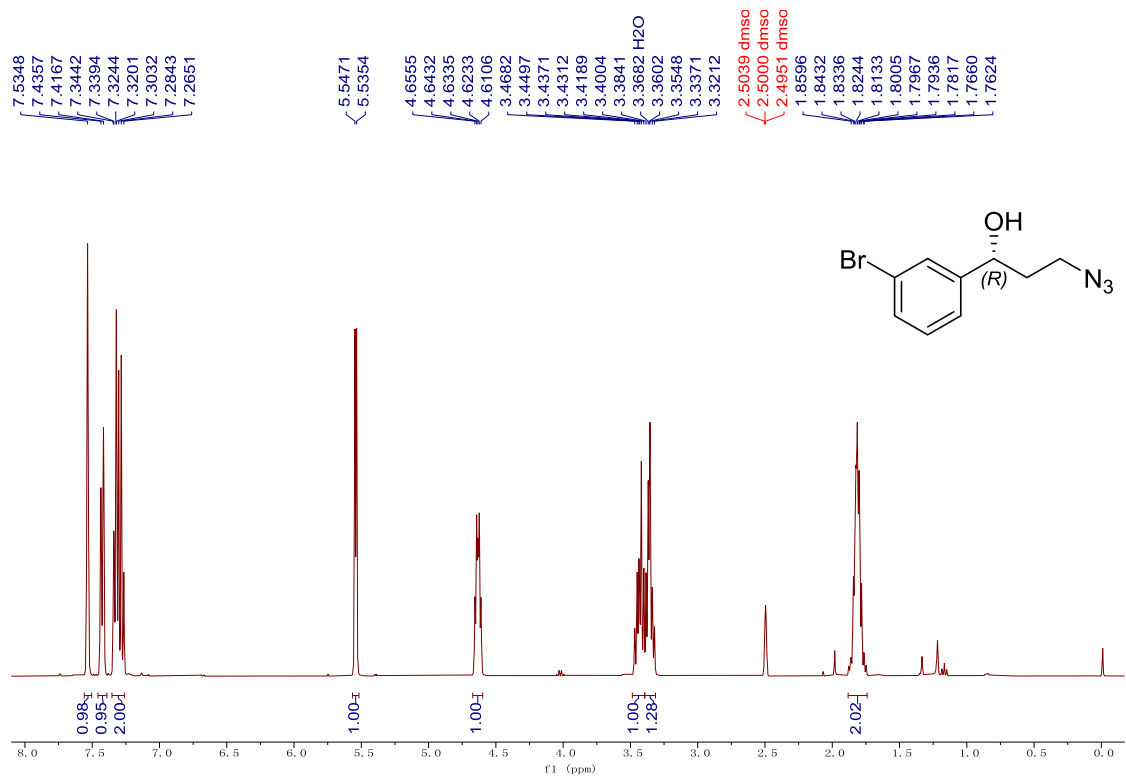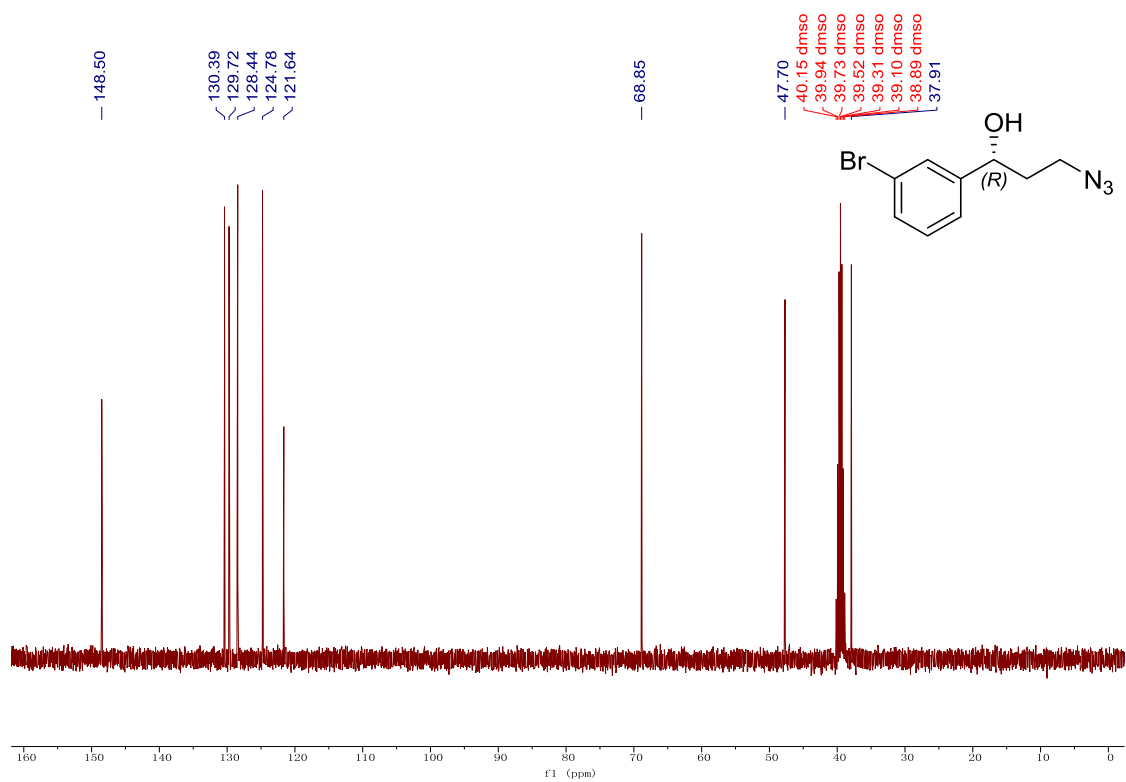

**(R)-3-azido-1-(m-tolyl)propan-1-ol [(R)-9c]**

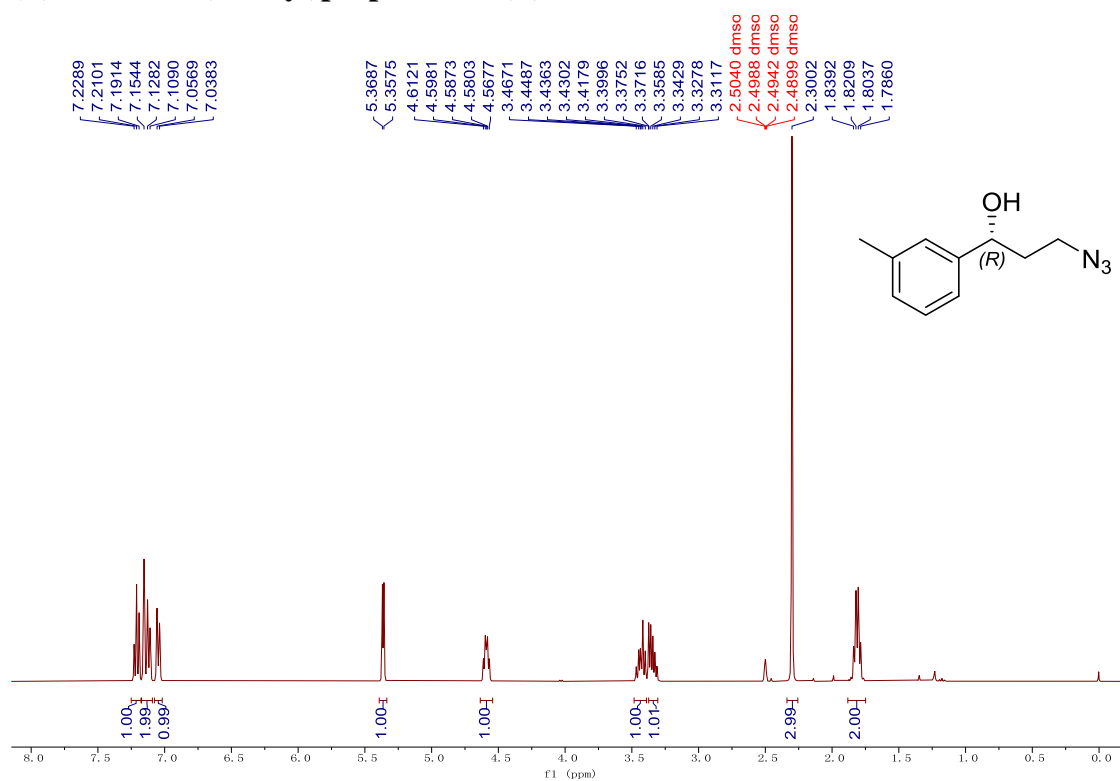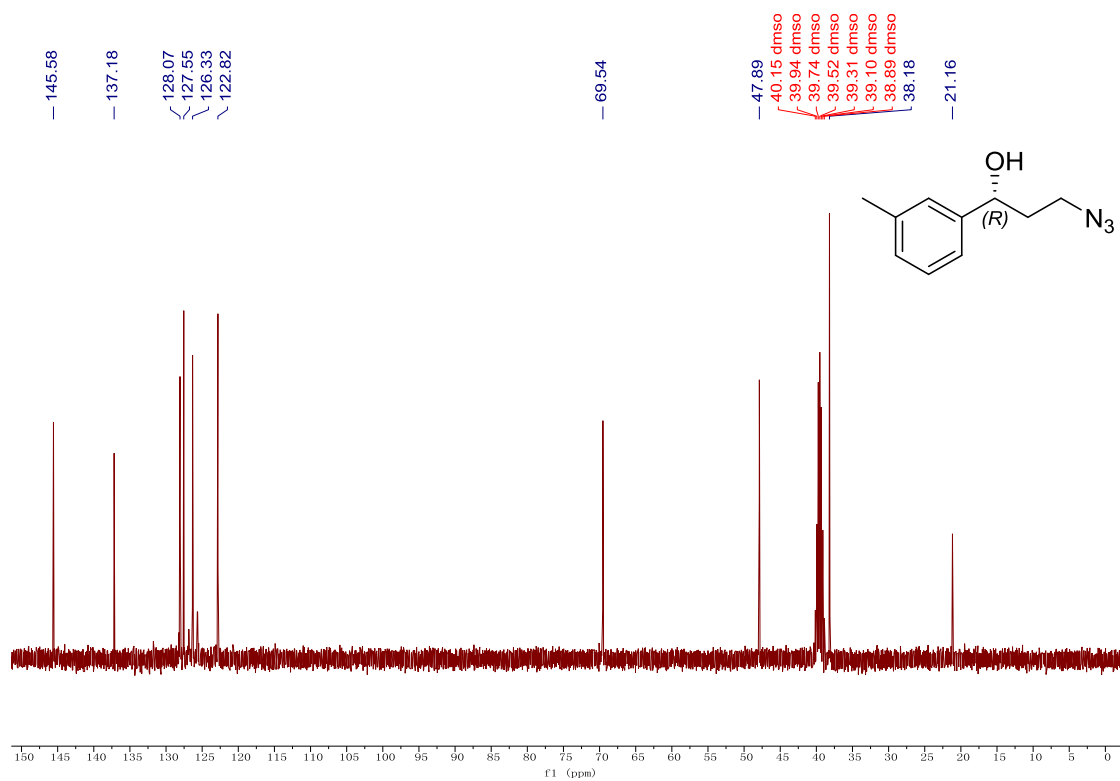

**(R)-3-azido-1-(3-methoxyphenyl)propan-1-ol [(R)-10c]**

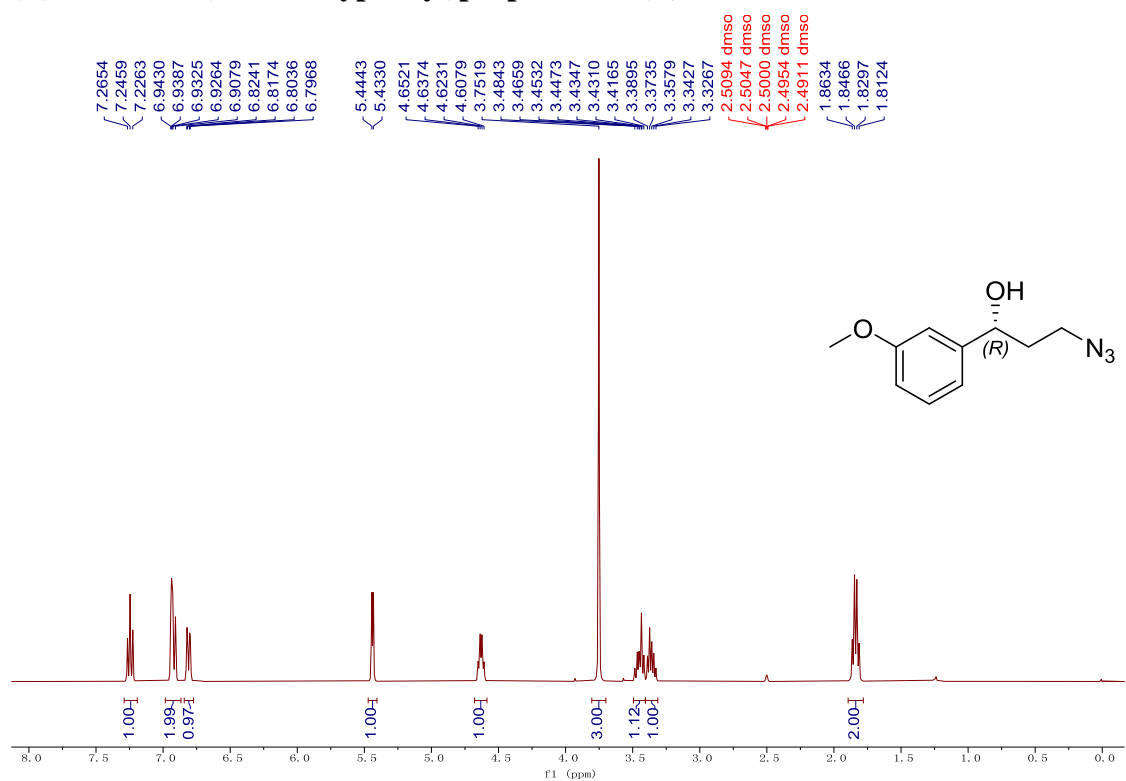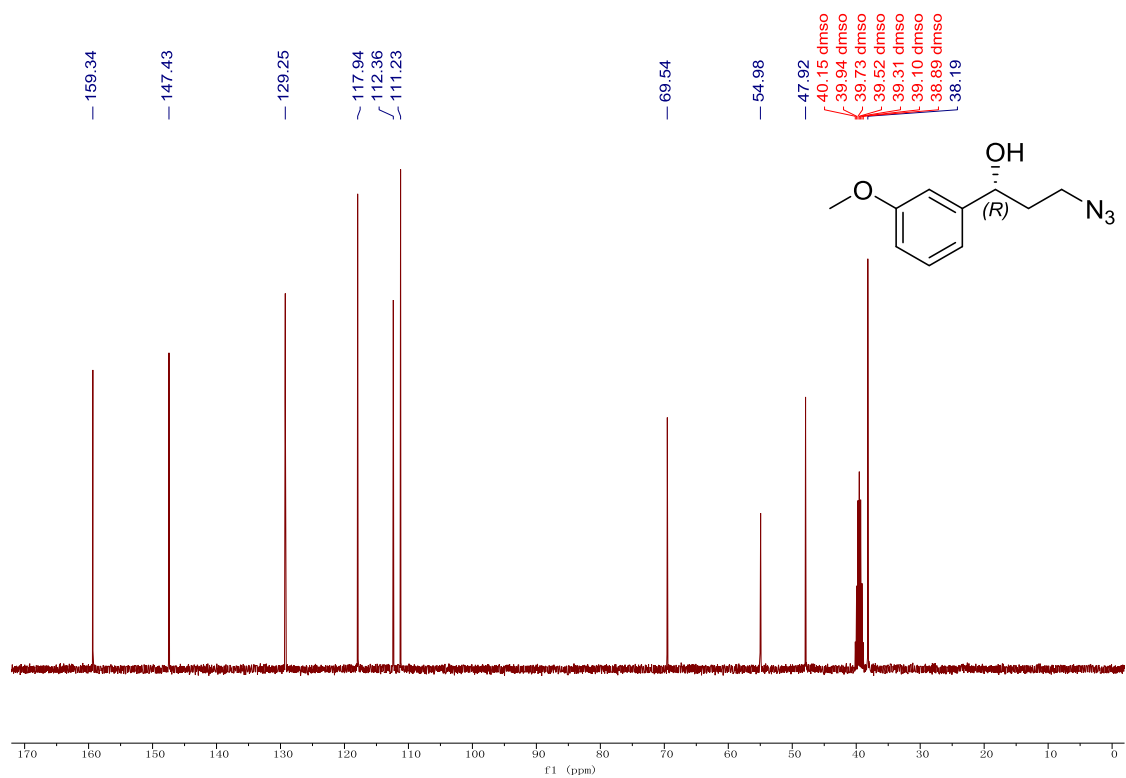

**(R)-3-azido-1-(4-fluorophenyl)propan-1-ol [(R)-11c]**

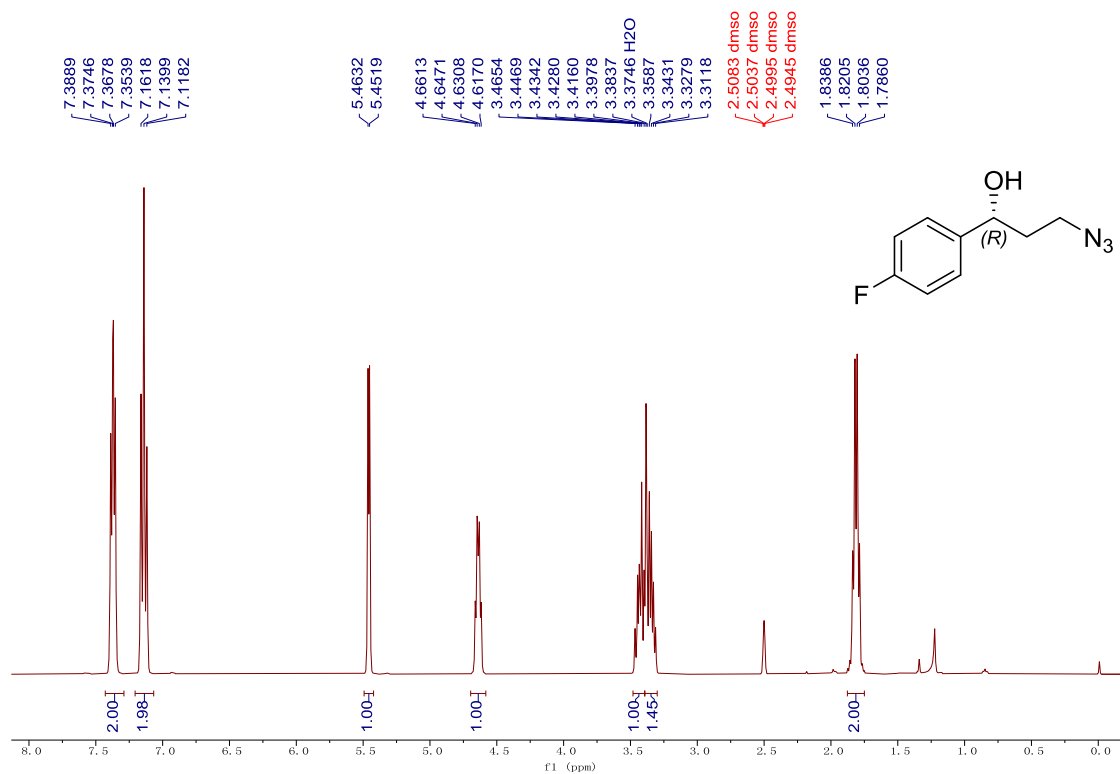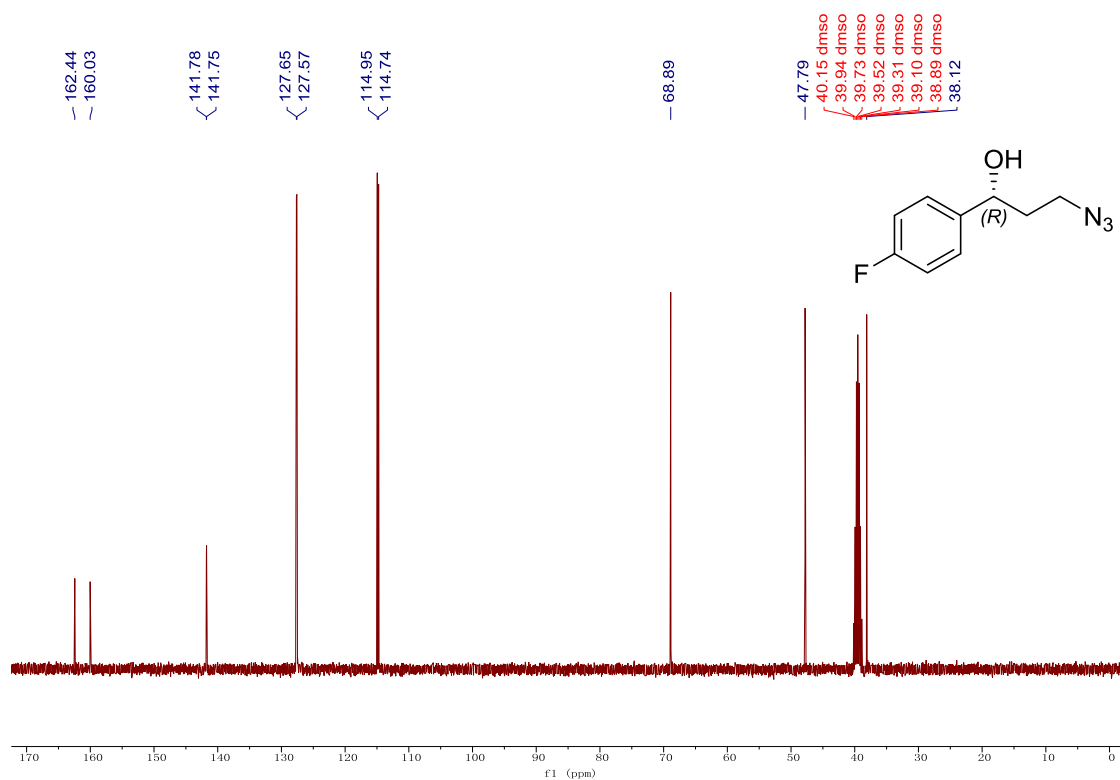

**(R)-3-azido-1-(4-chlorophenyl)propan-1-ol [(R)-12c]**

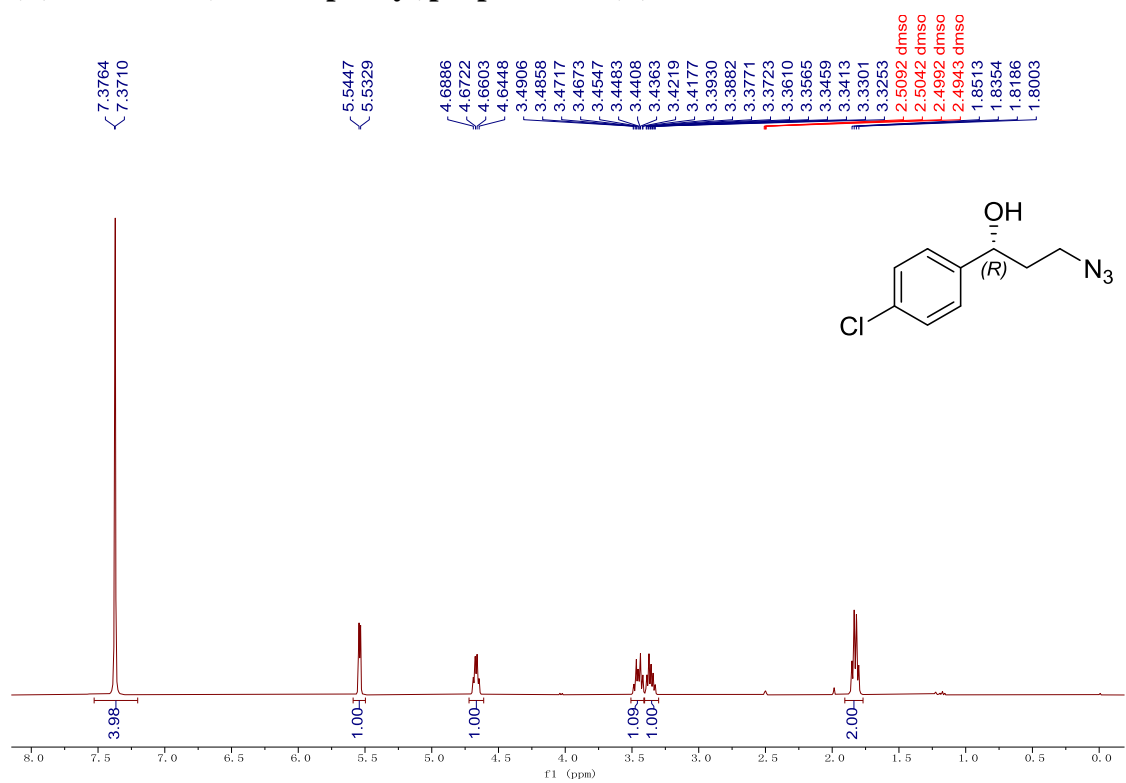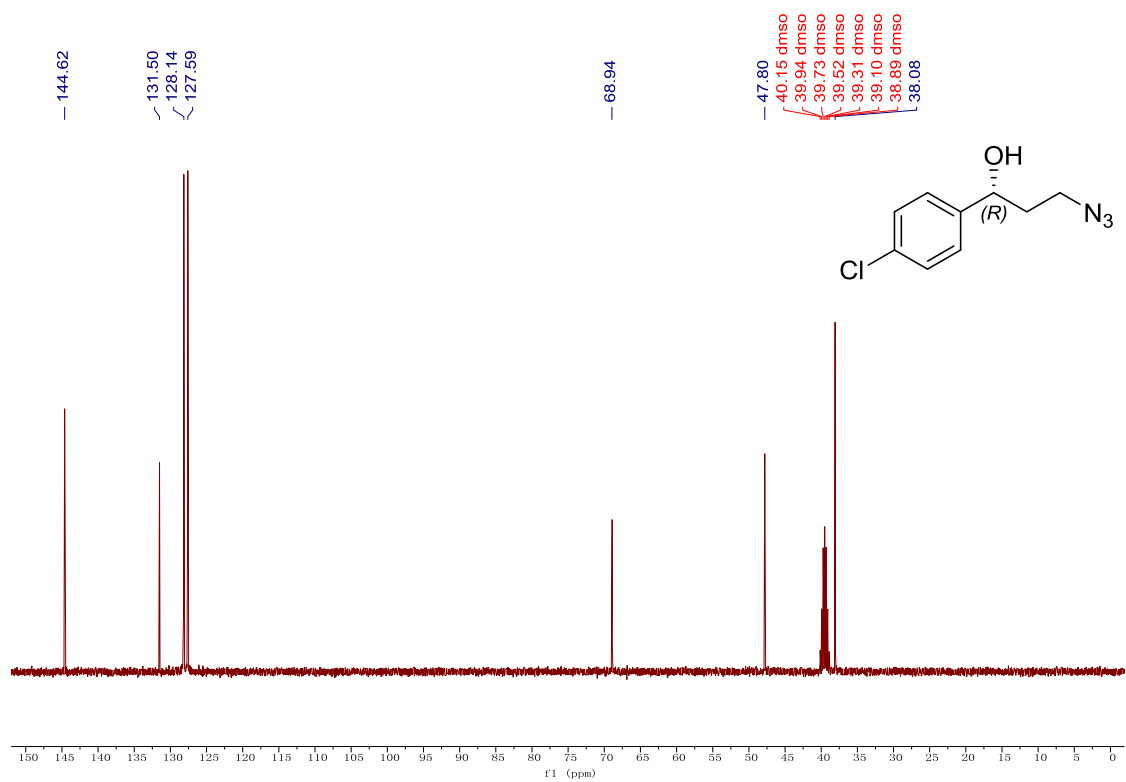

**(*R*)-3-azido-1-(4-bromophenyl)propan-1-ol [(*R*)-13c]**

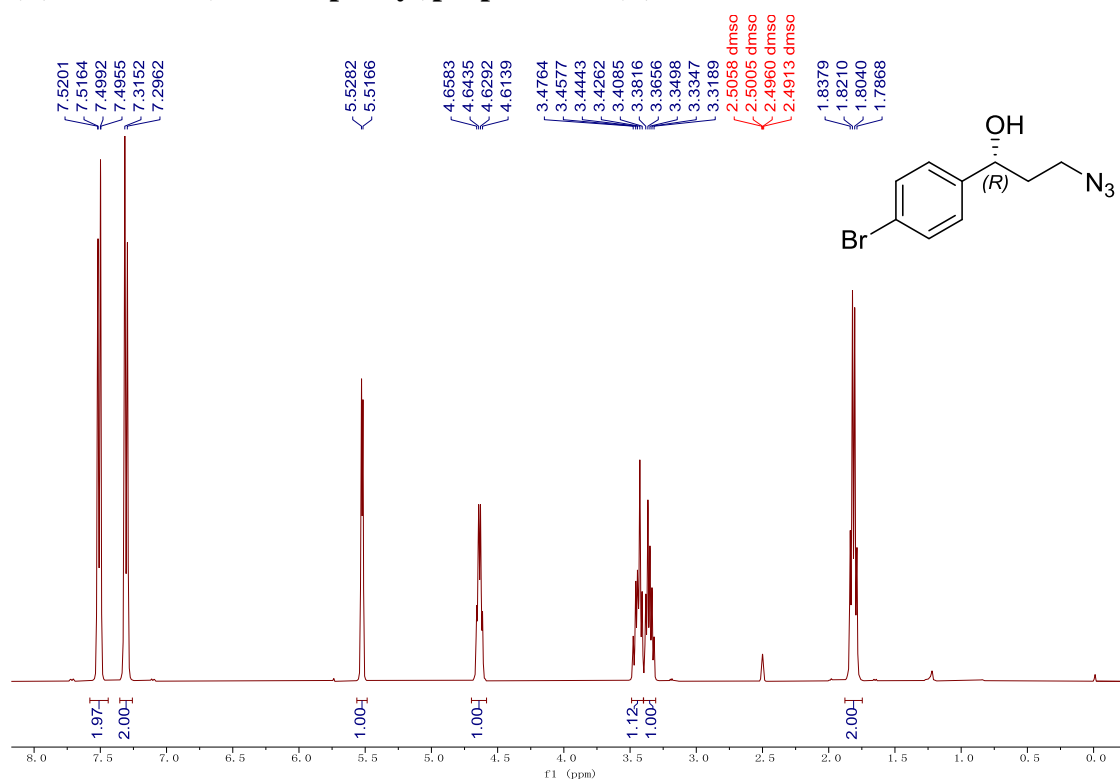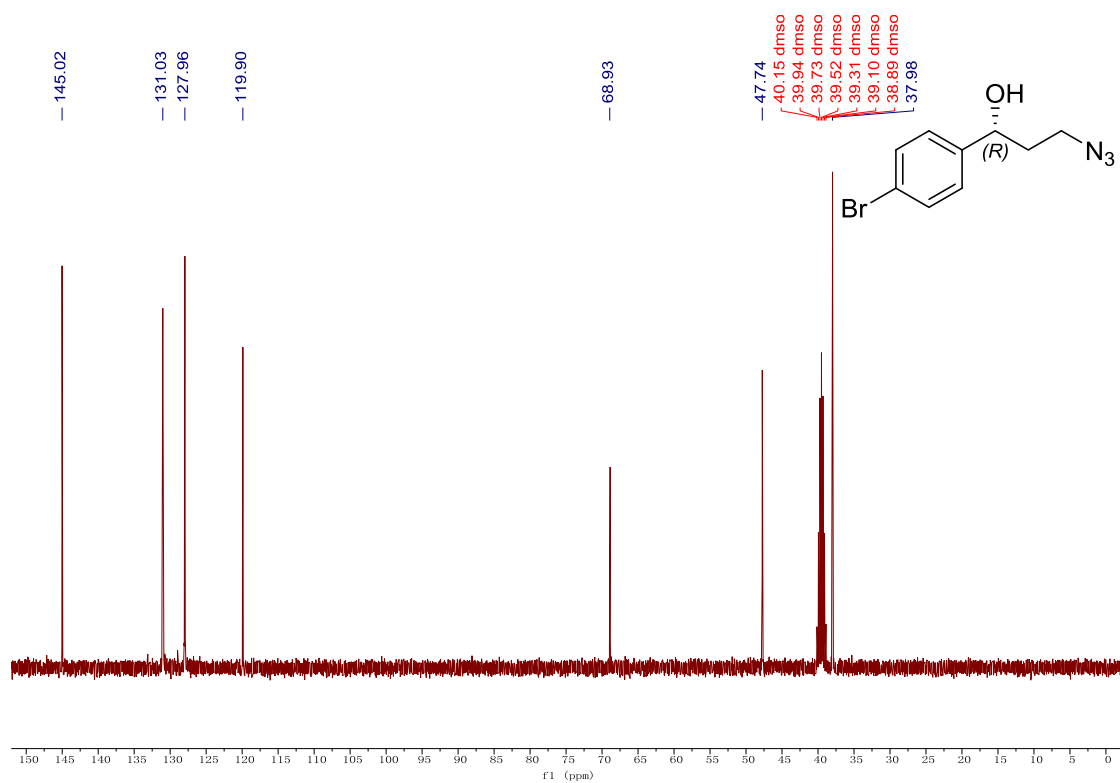



**(R)-3-azido-1-(4-(trifluoromethyl)phenyl)propan-1-ol [(R)-14c]**

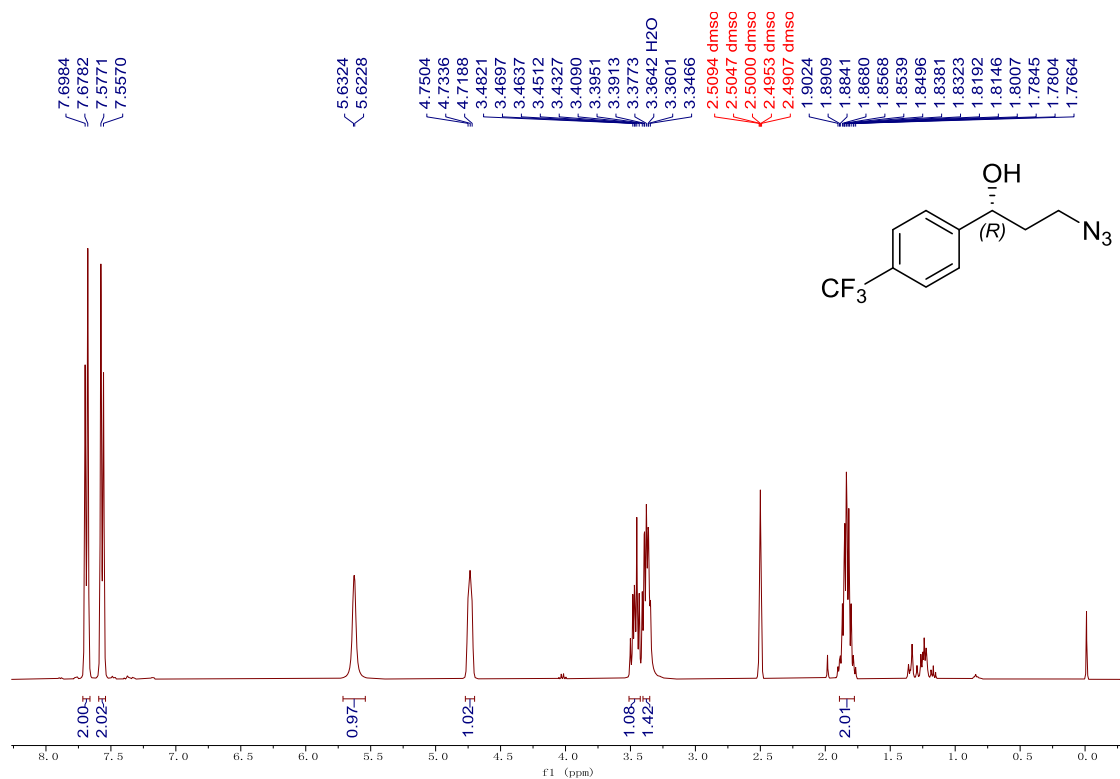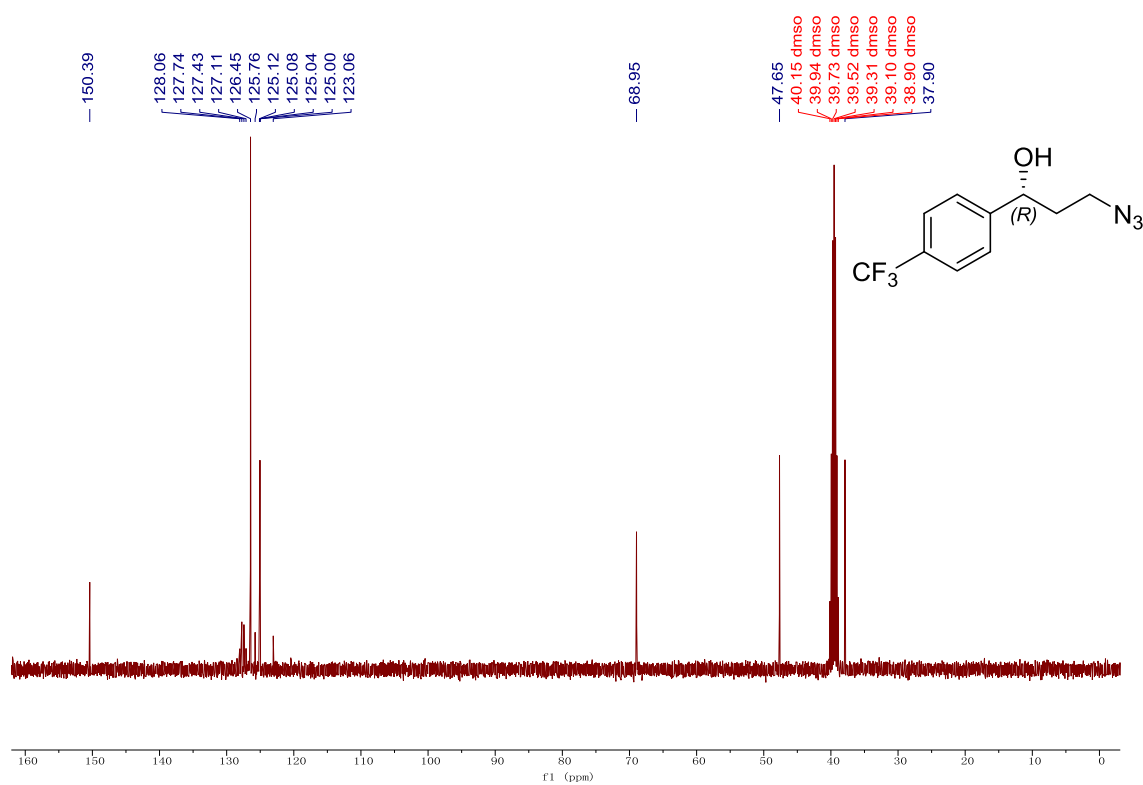

**(R)-3-azido-1-(3,5-difluorophenyl)propan-1-ol [(R)-15c]**

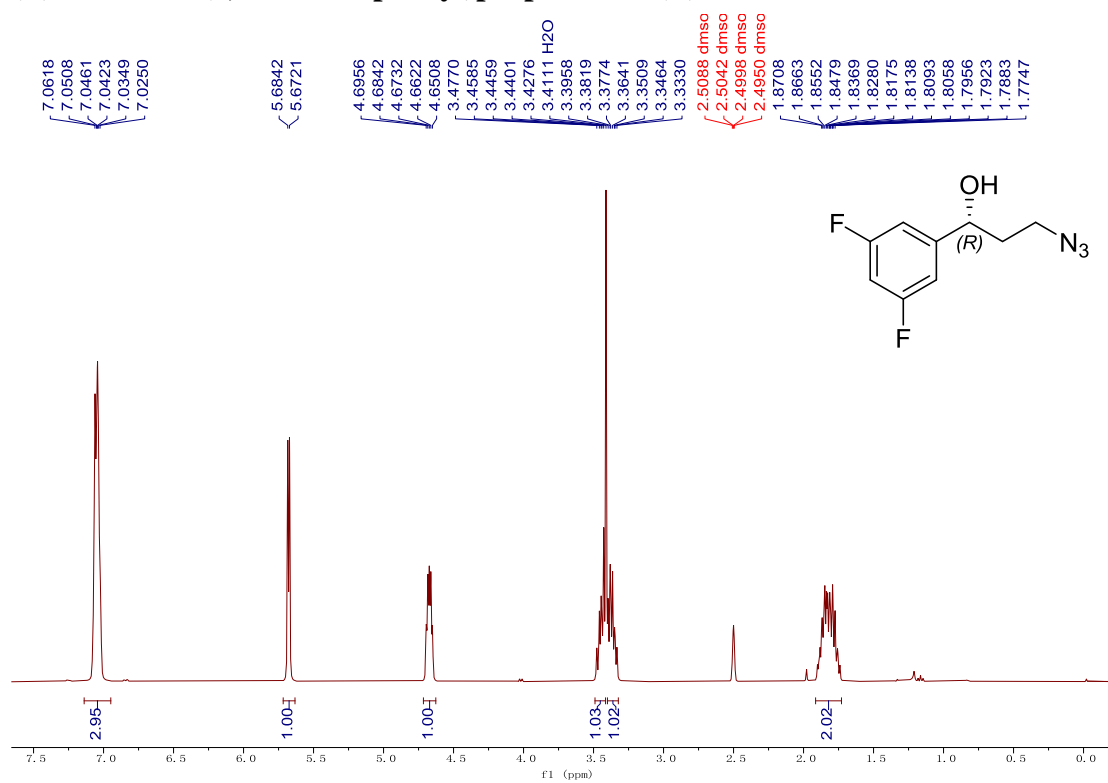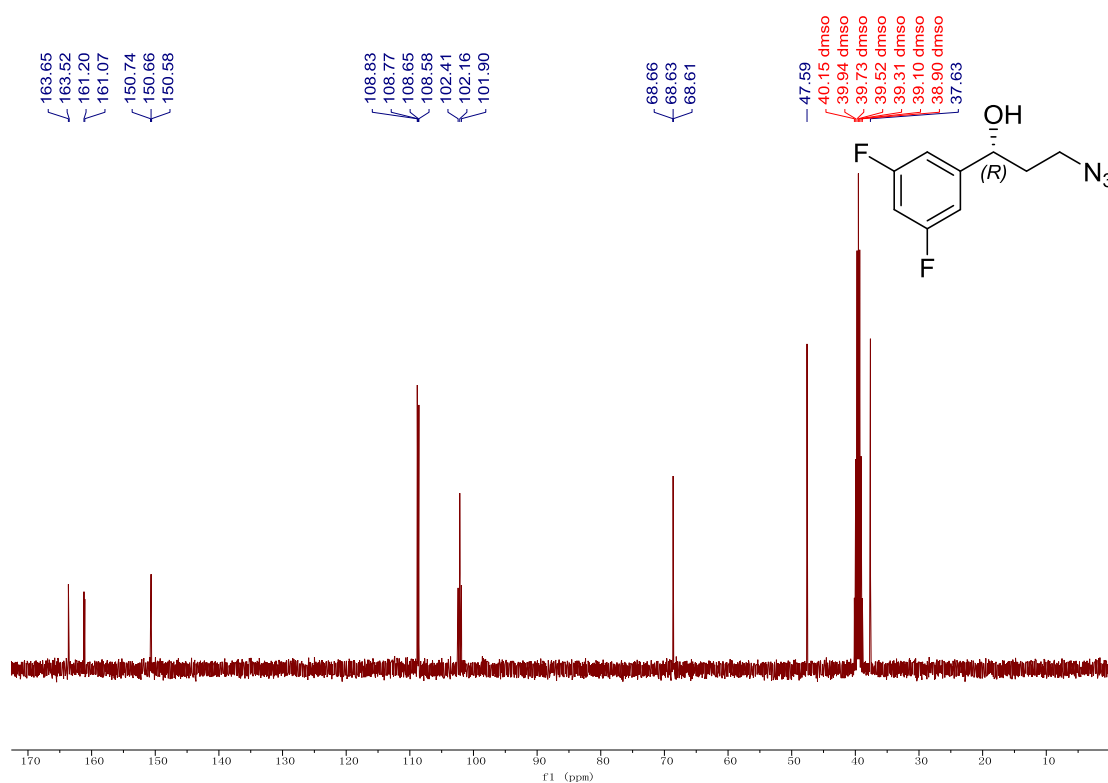

**(R)-3-azido-1-(naphthalen-2-yl)propan-1-ol [(R)-16c]**

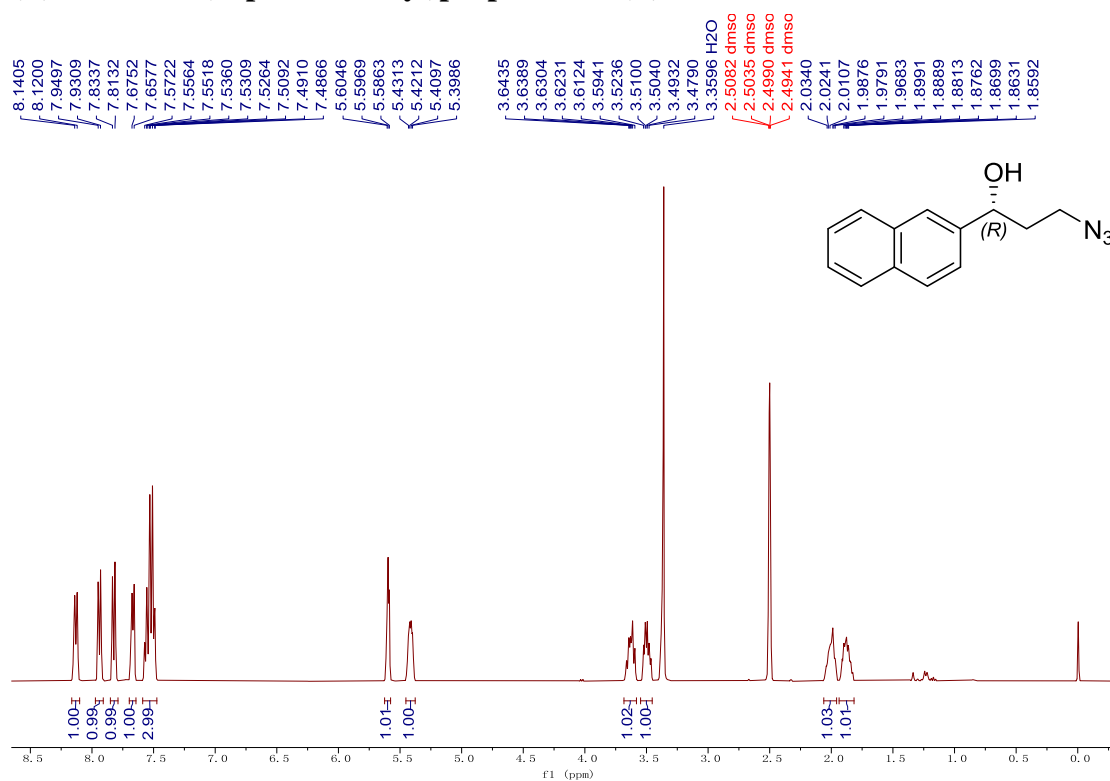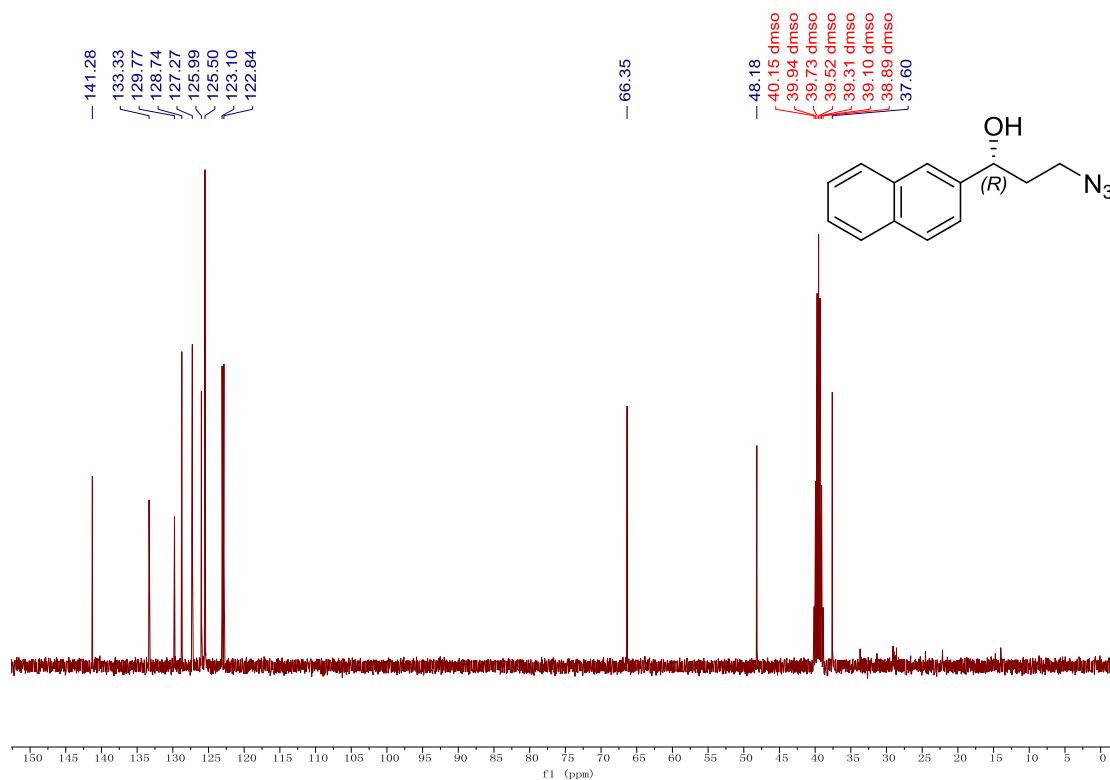

**(R)-4-azido-2-phenylbutan-2-ol [(R)-17c]**

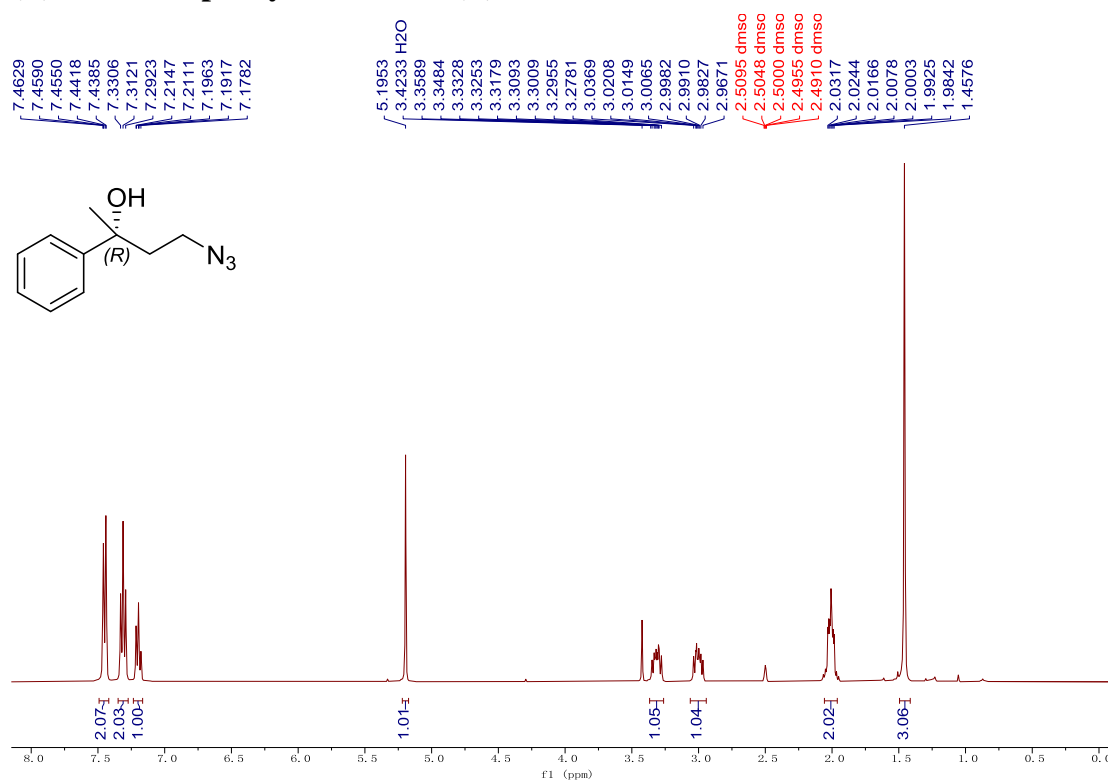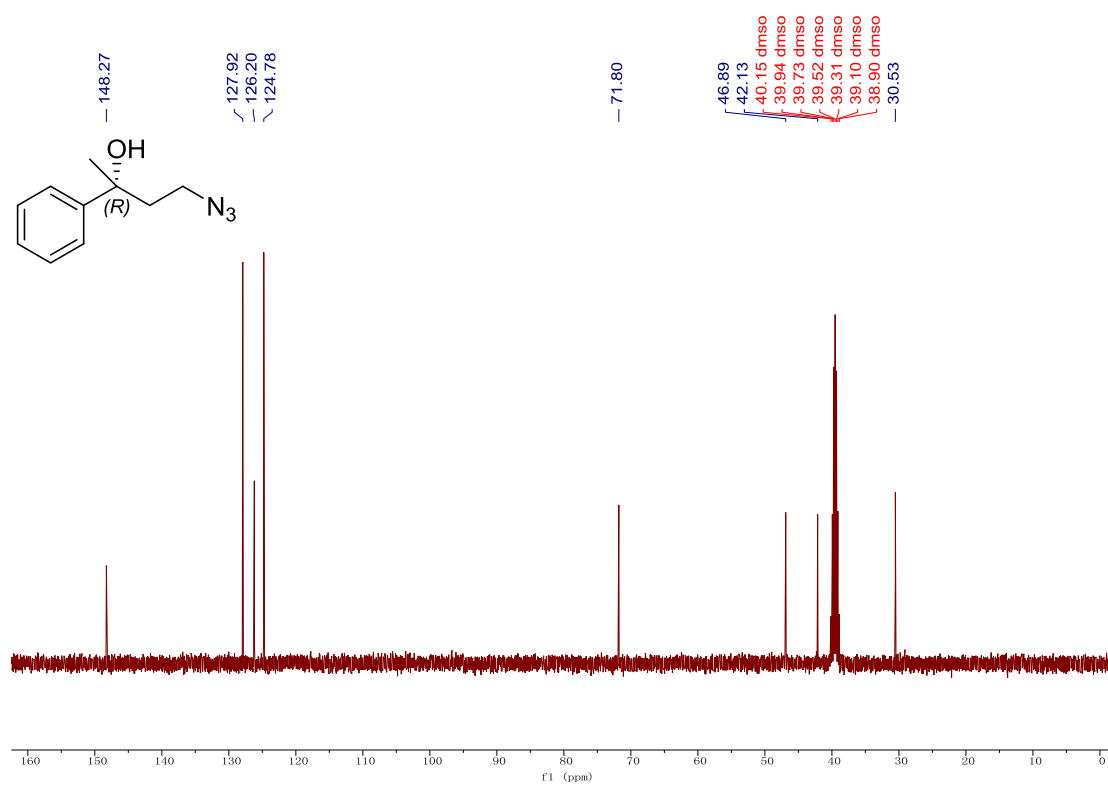

**(R)-3-azido-1-(5-bromopyridin-3-yl)propan-1-ol [(R)-18c]**

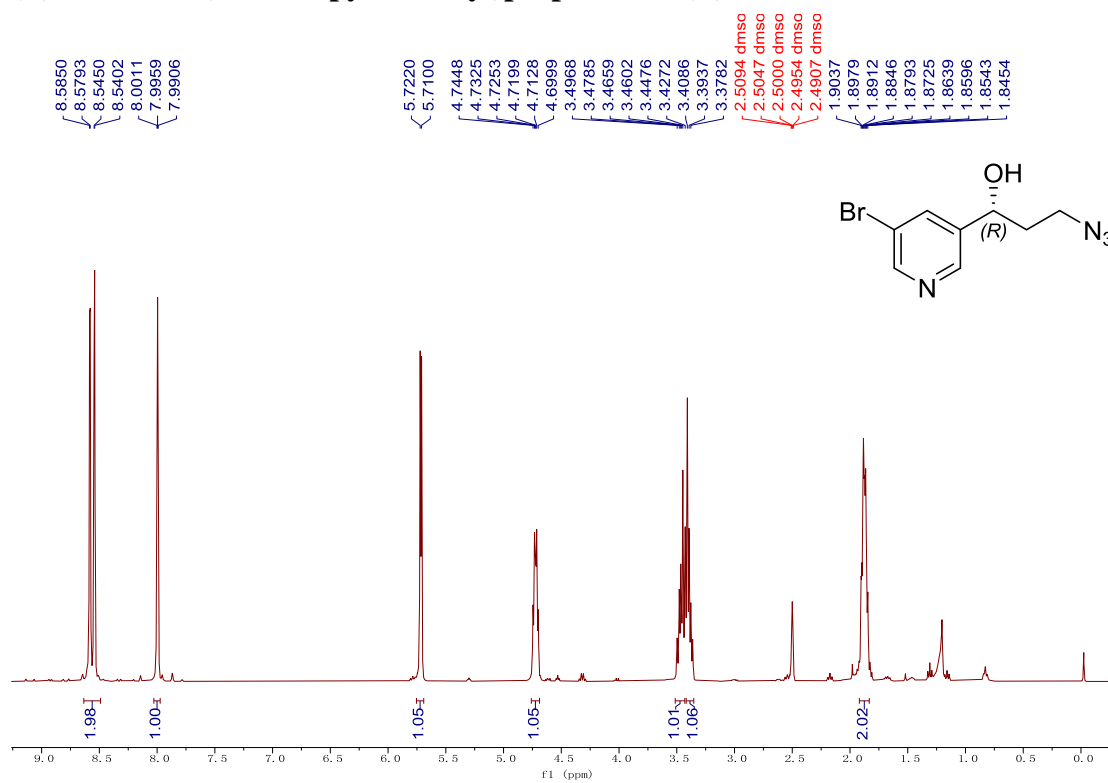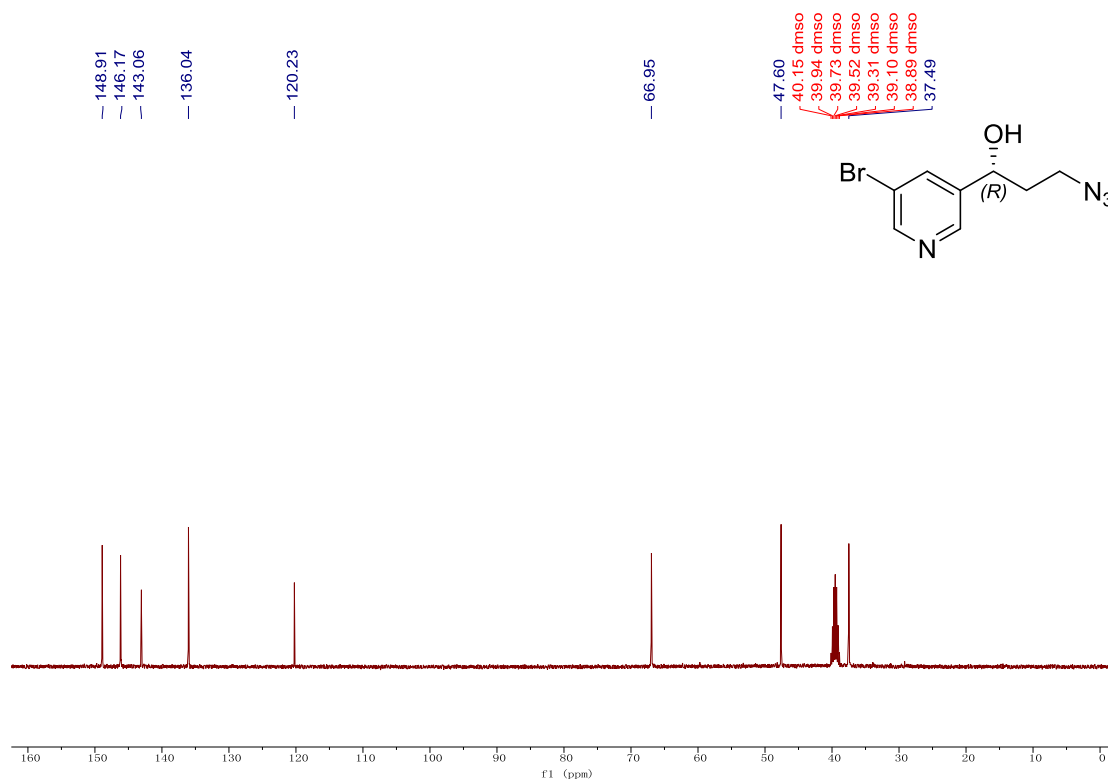

**(R)-3-azido-1-(quinolin-3-yl)propan-1-ol [(R)-19c]**

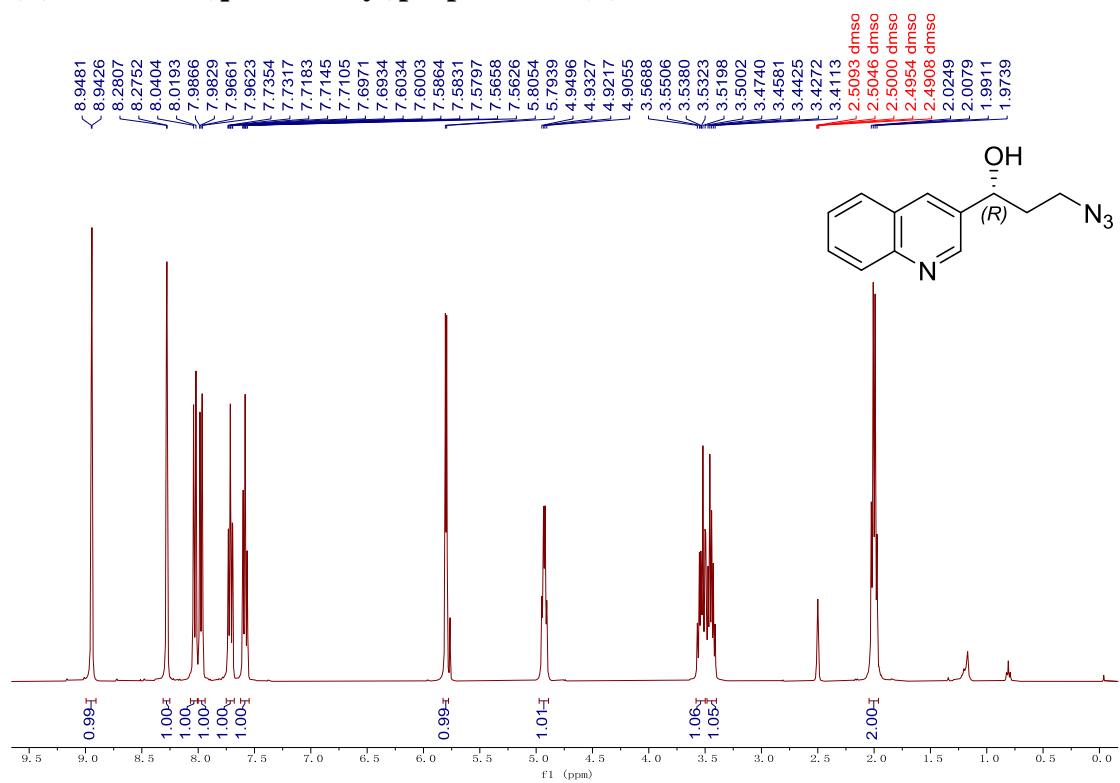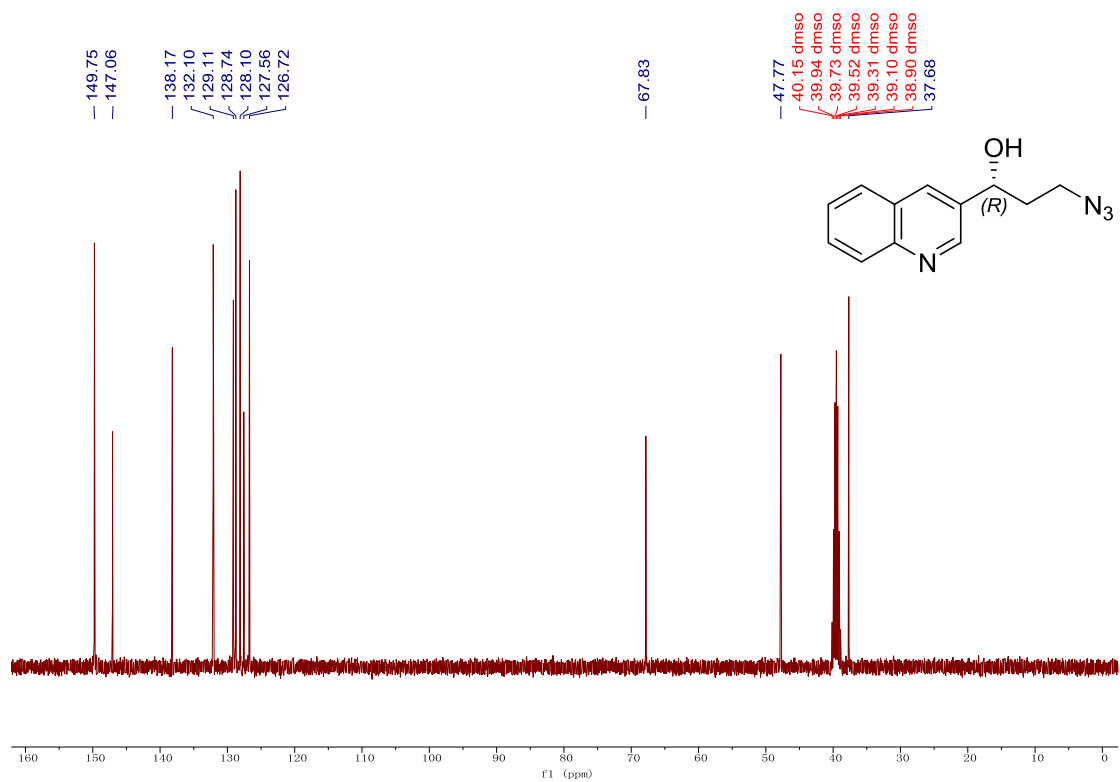

**(R)-3-azido-1-cyclohexylpropan-1-ol [(R)-21c]**

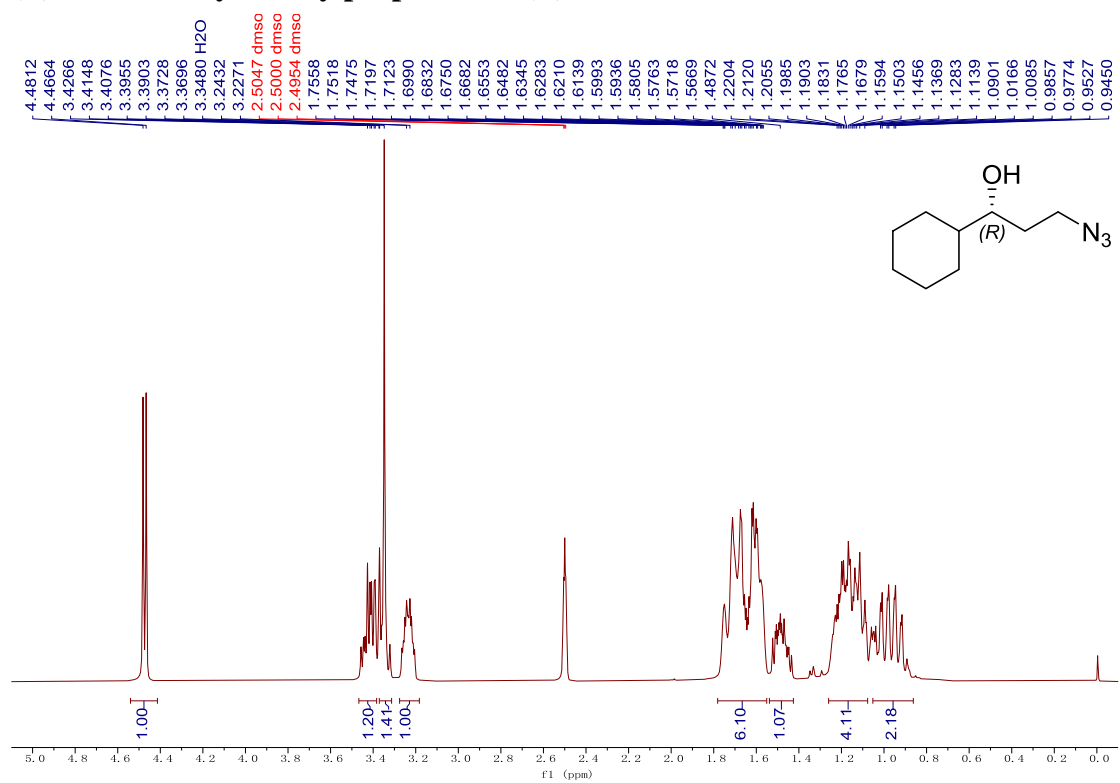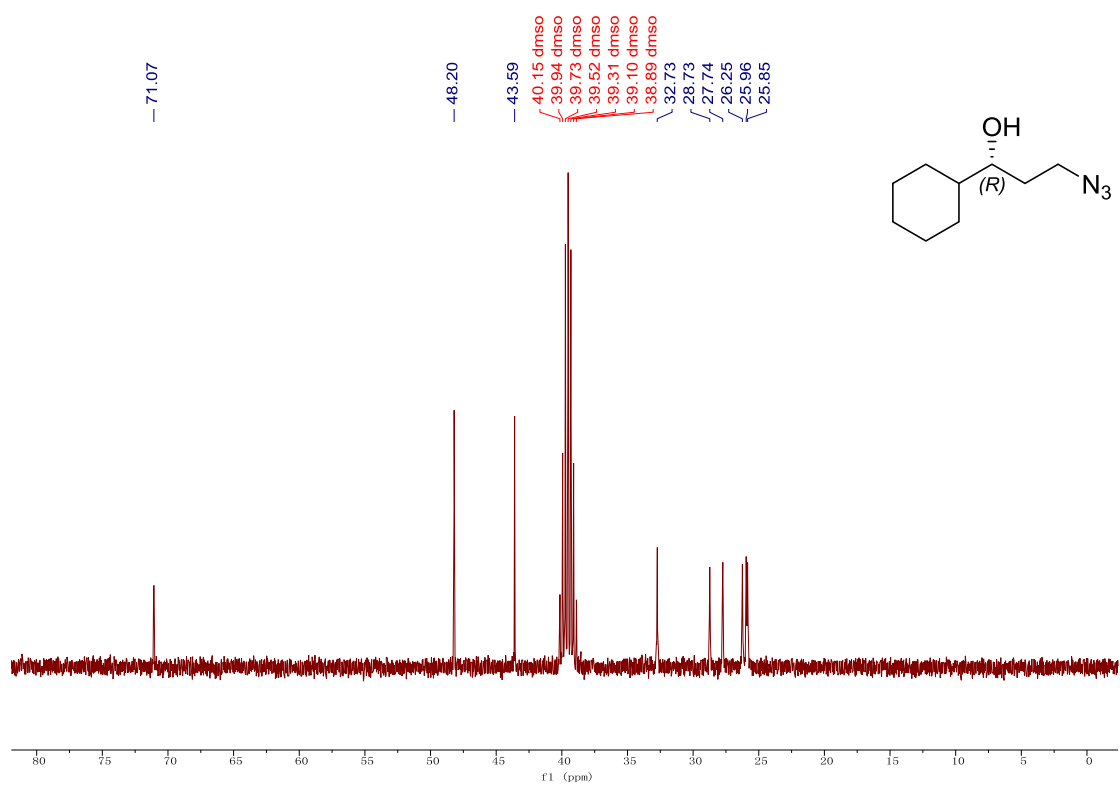

**(R)-4-hydroxy-4-phenylbutanenitrile [(R)-1d]**

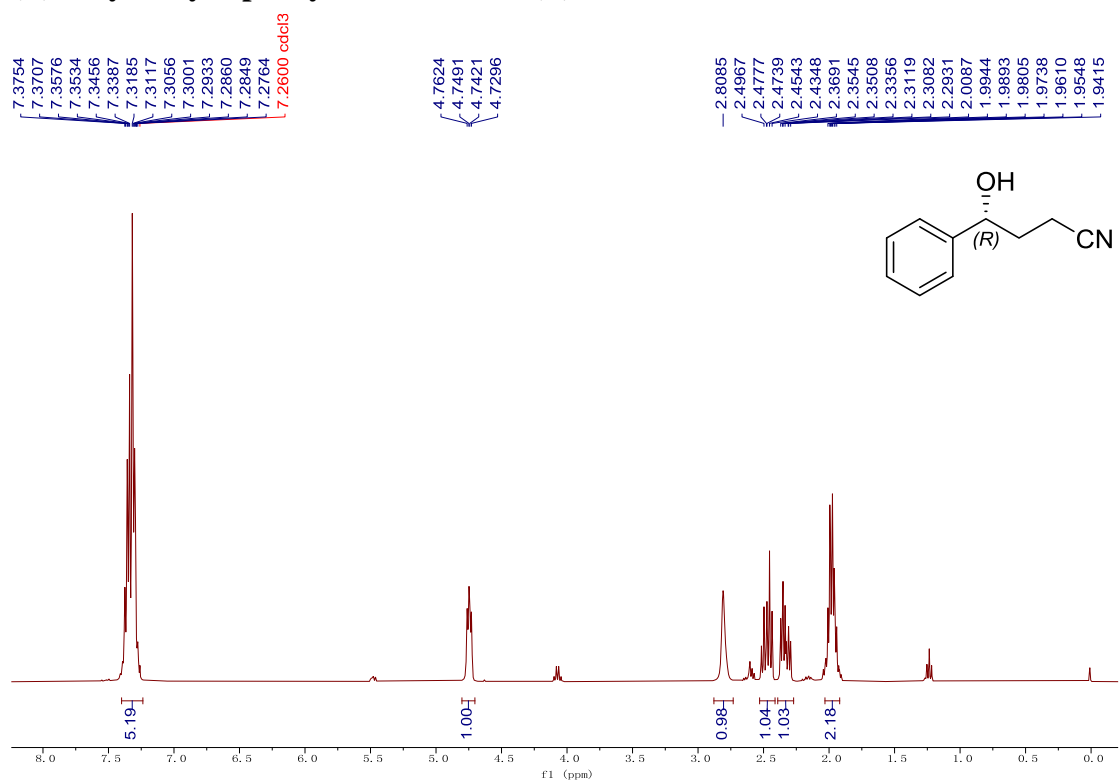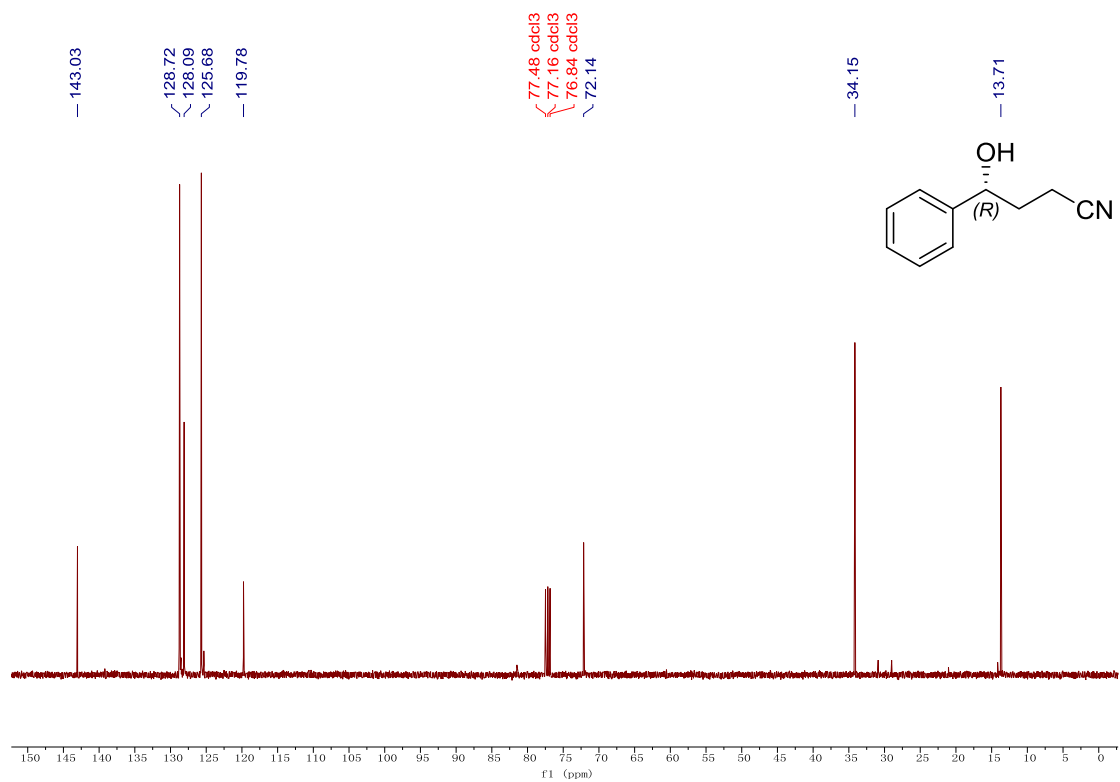



**(R)-3-nitro-1-phenylpropan-1-ol [(R)-1e]**

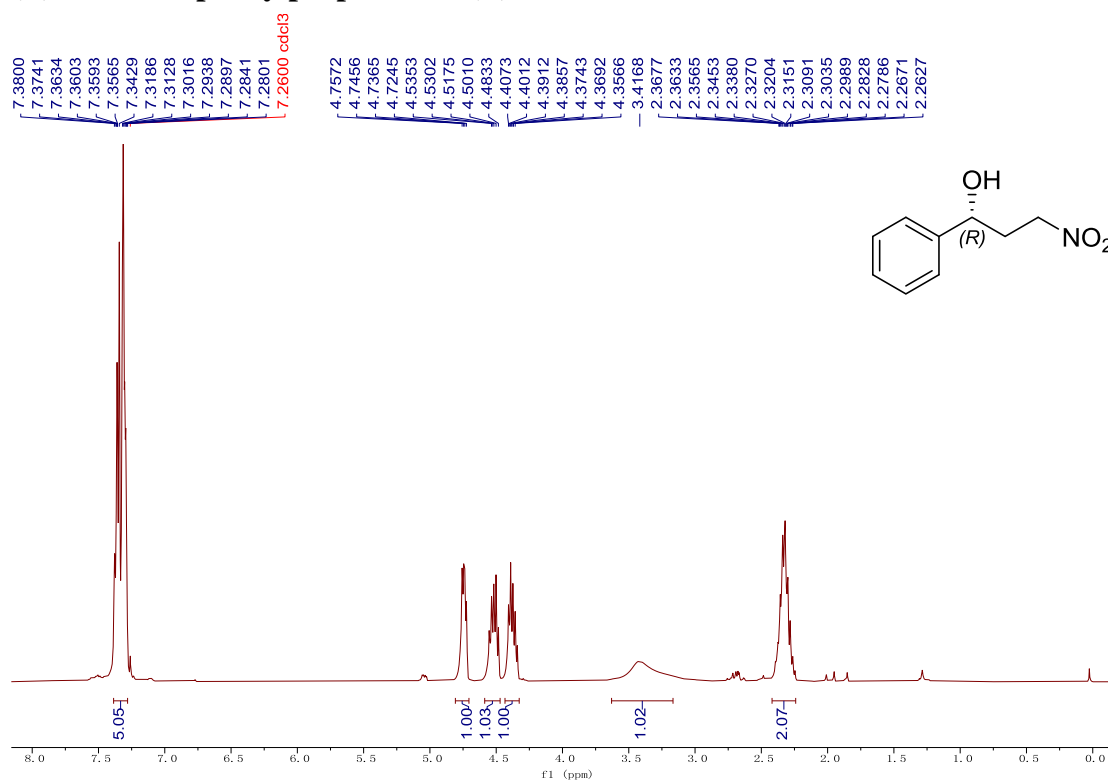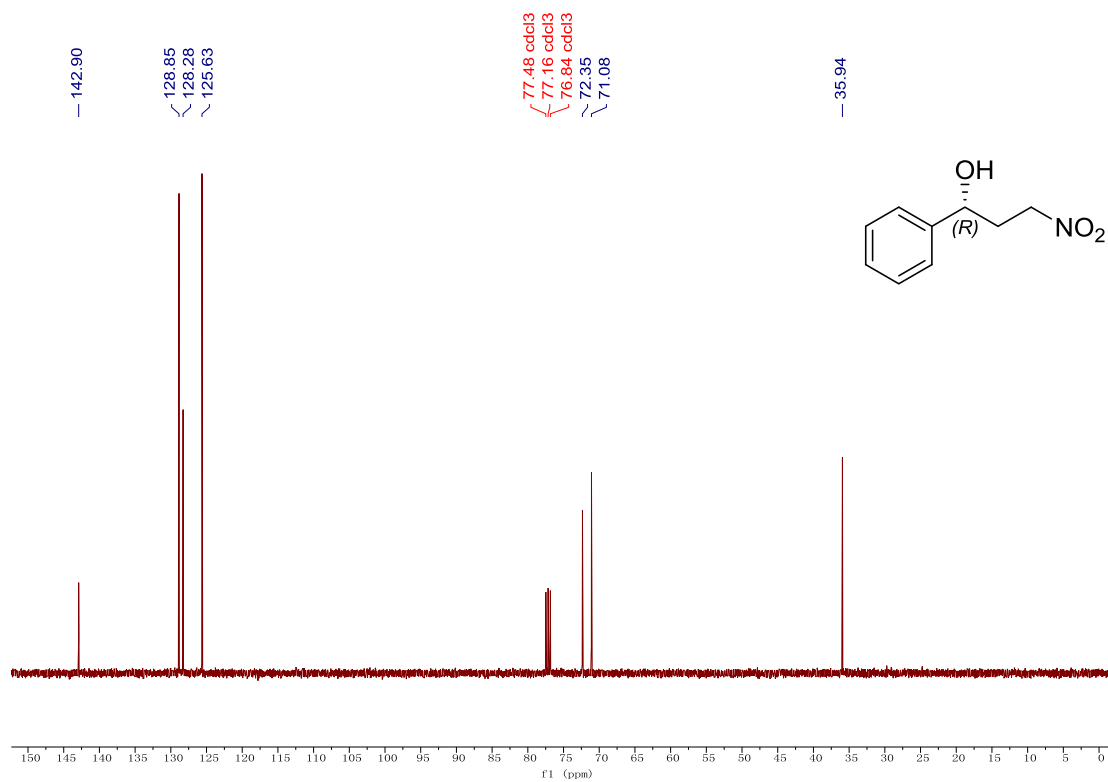

**(R)-1-phenylpropane-1,3-diol [(R)-1f]**

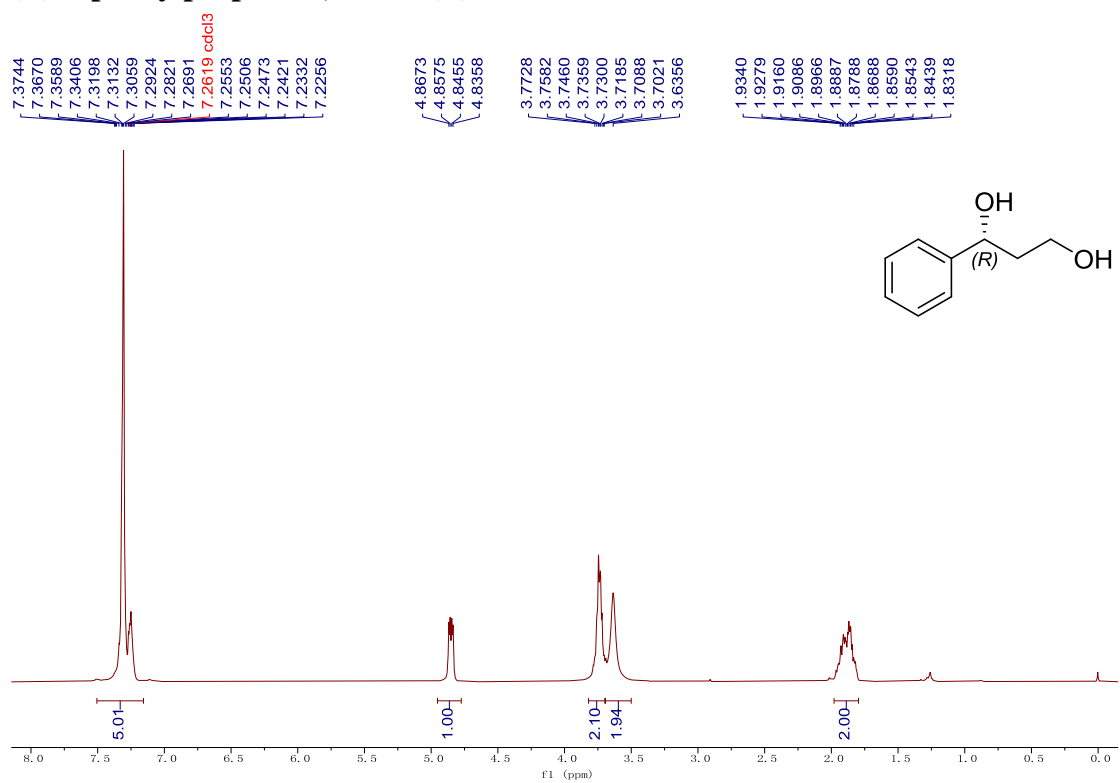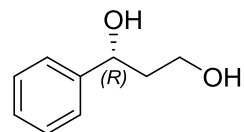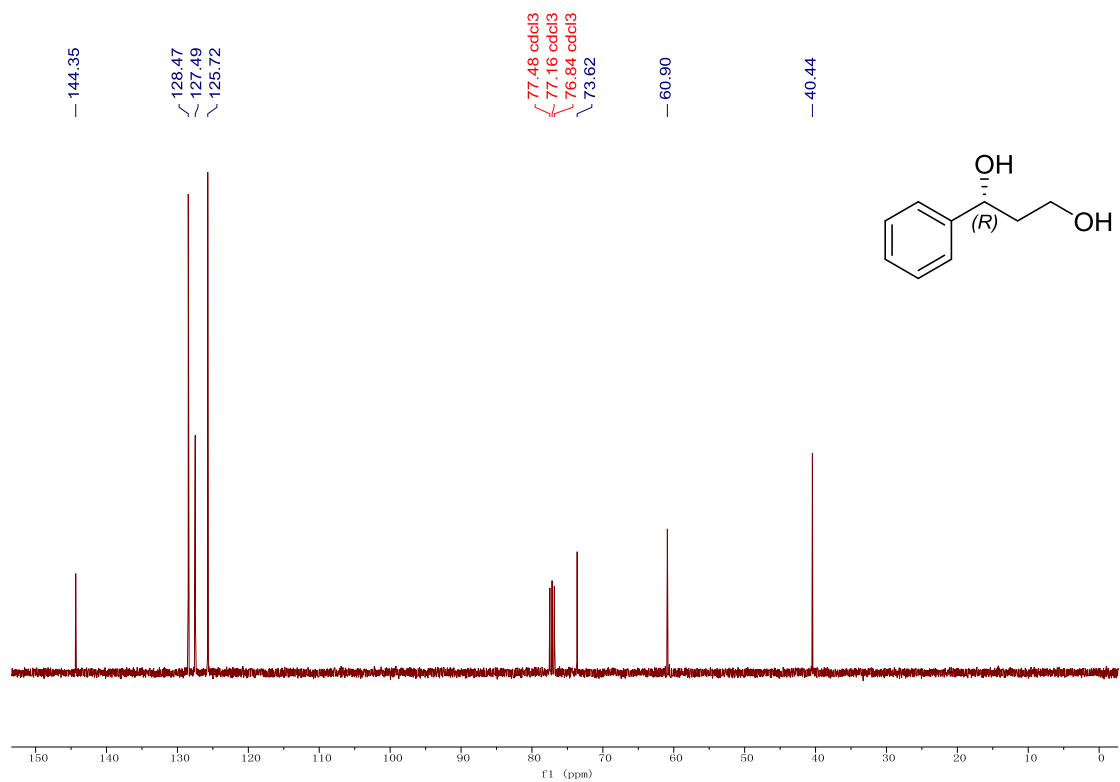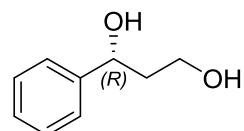

**(R)-3-phenylisoxazolidine [(R)-1aa]**

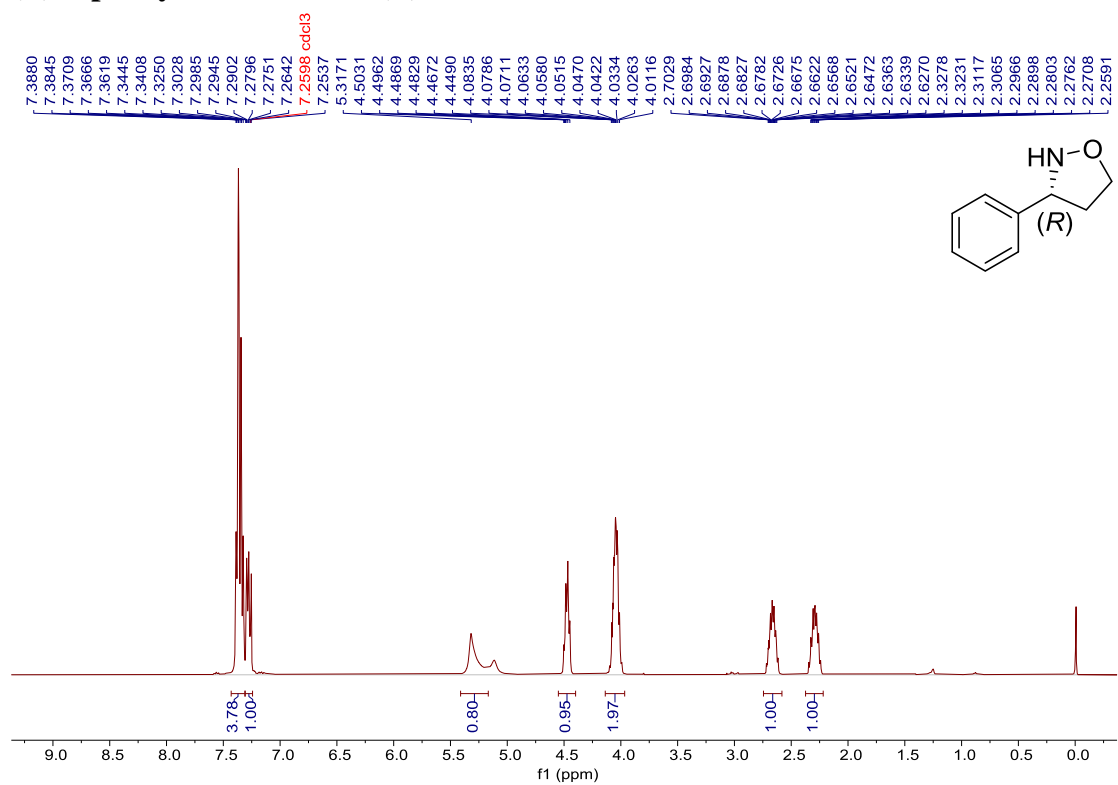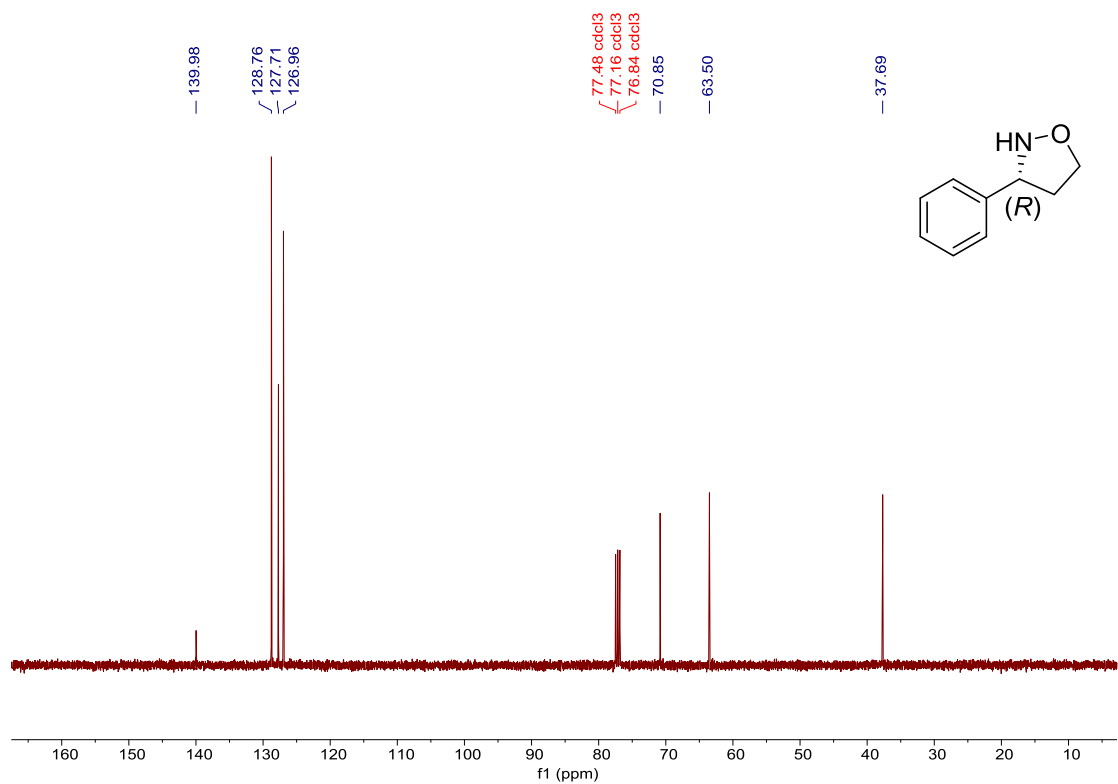

**(S)-3-(naphthalen-1-yloxy)-1-phenylpropan-1-ol [(S)-1ab]**

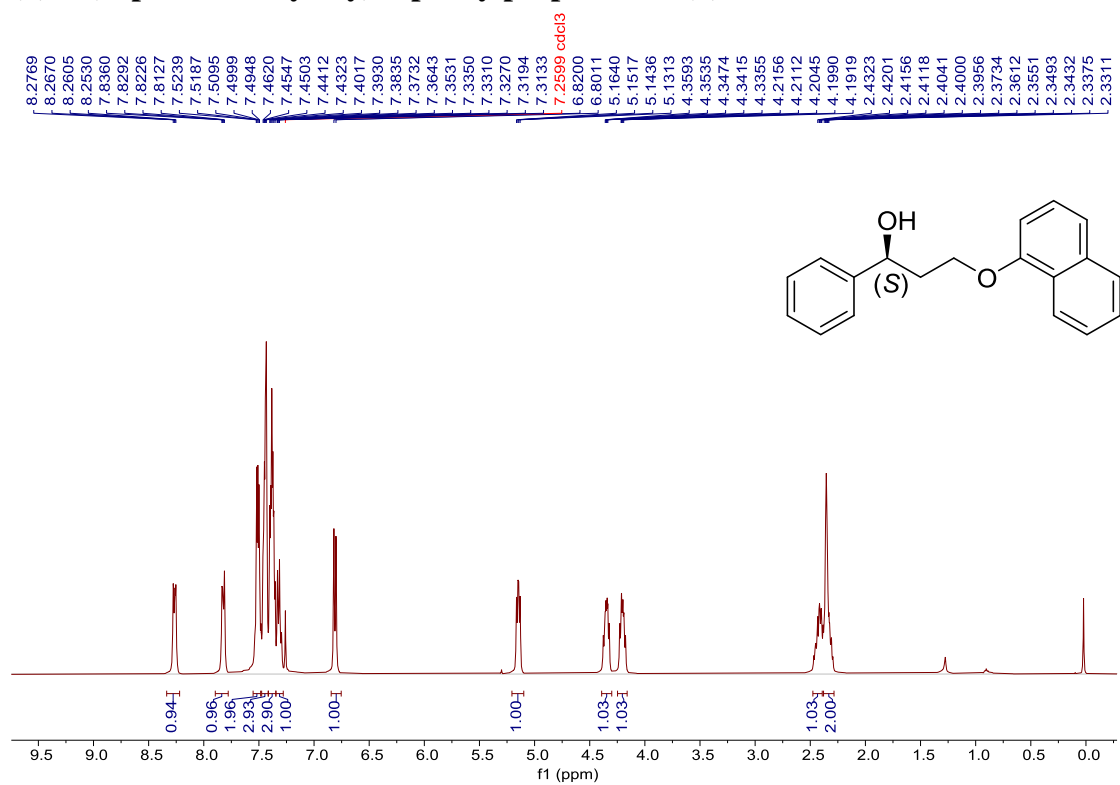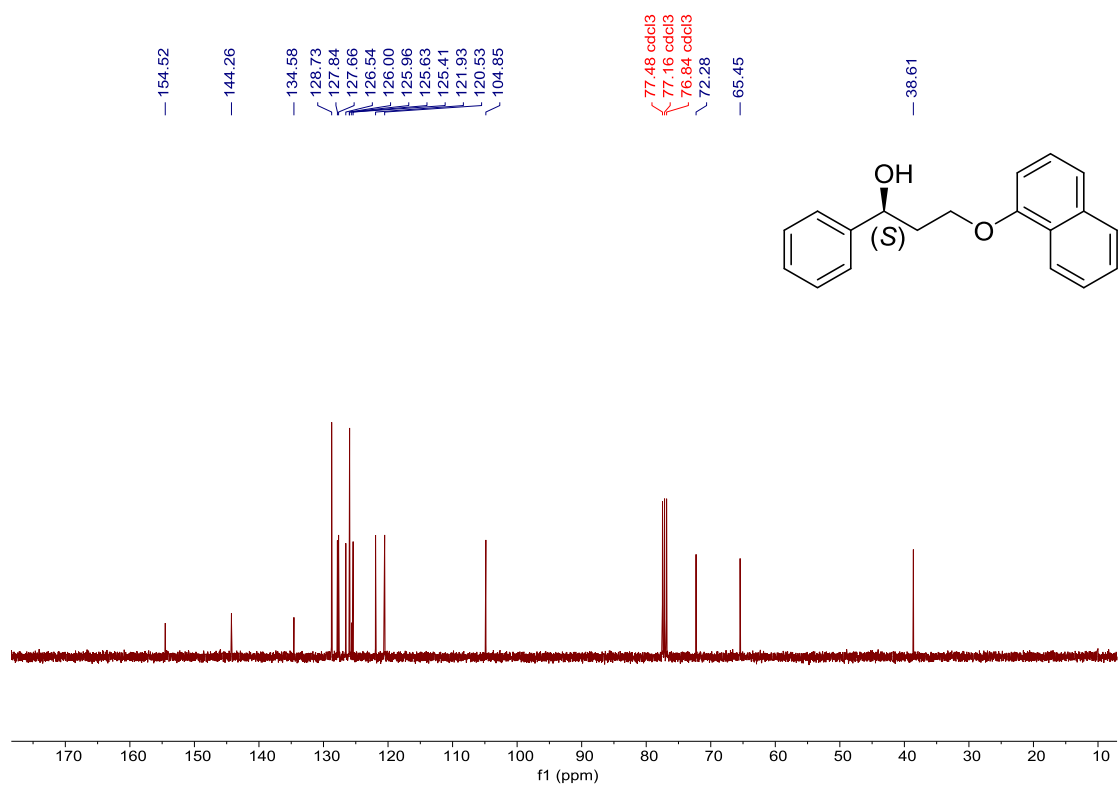

**(R)-2-phenyltetrahydrofuran [(R)-1ba]**

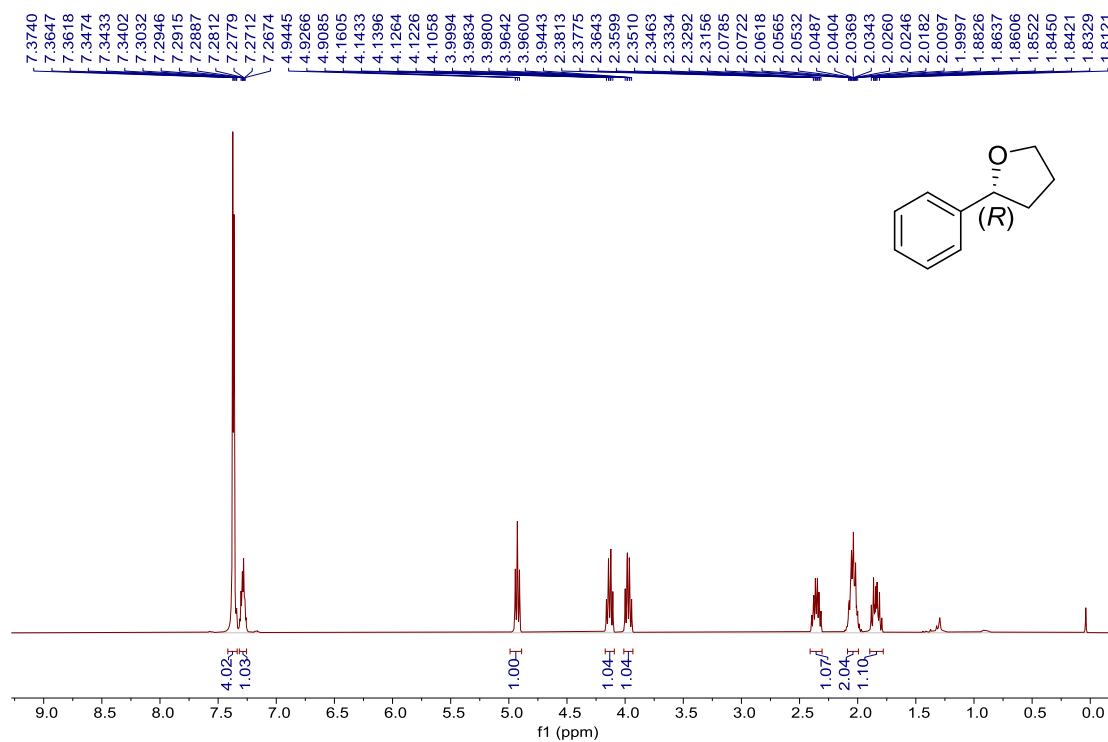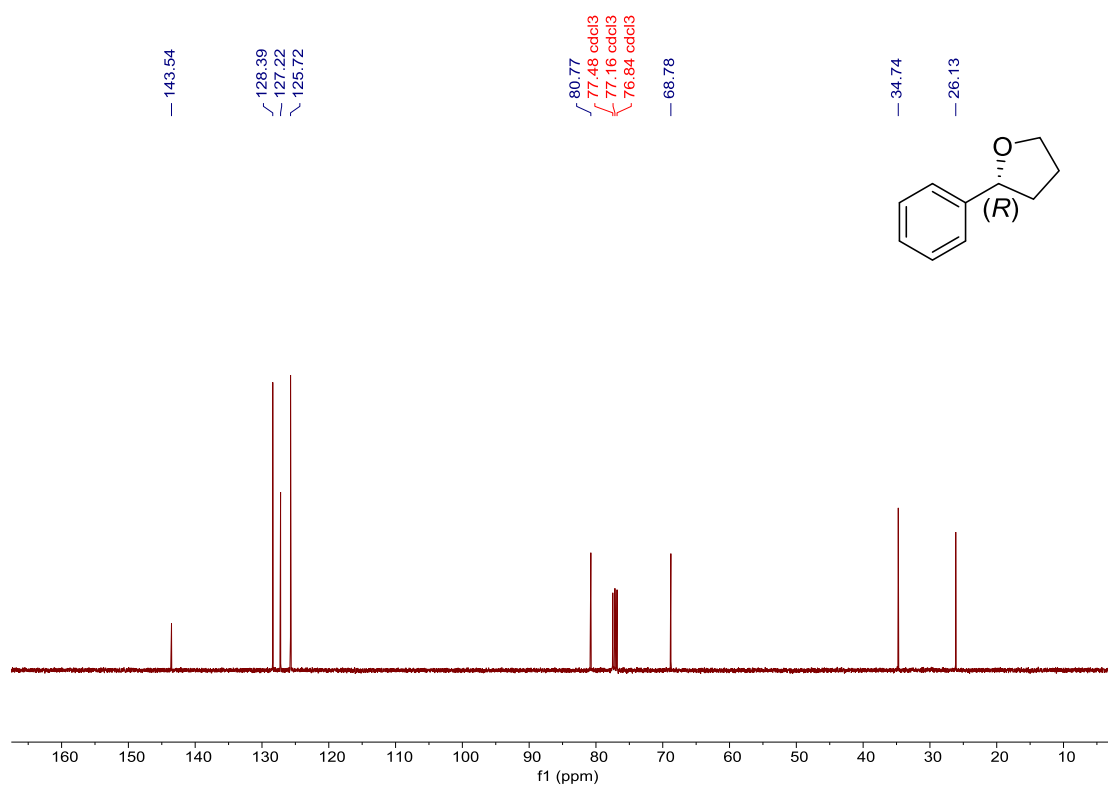

**(R)-3-phenyl-3-(o-tolyloxy)propan-1-ol [(R)-1bb]**

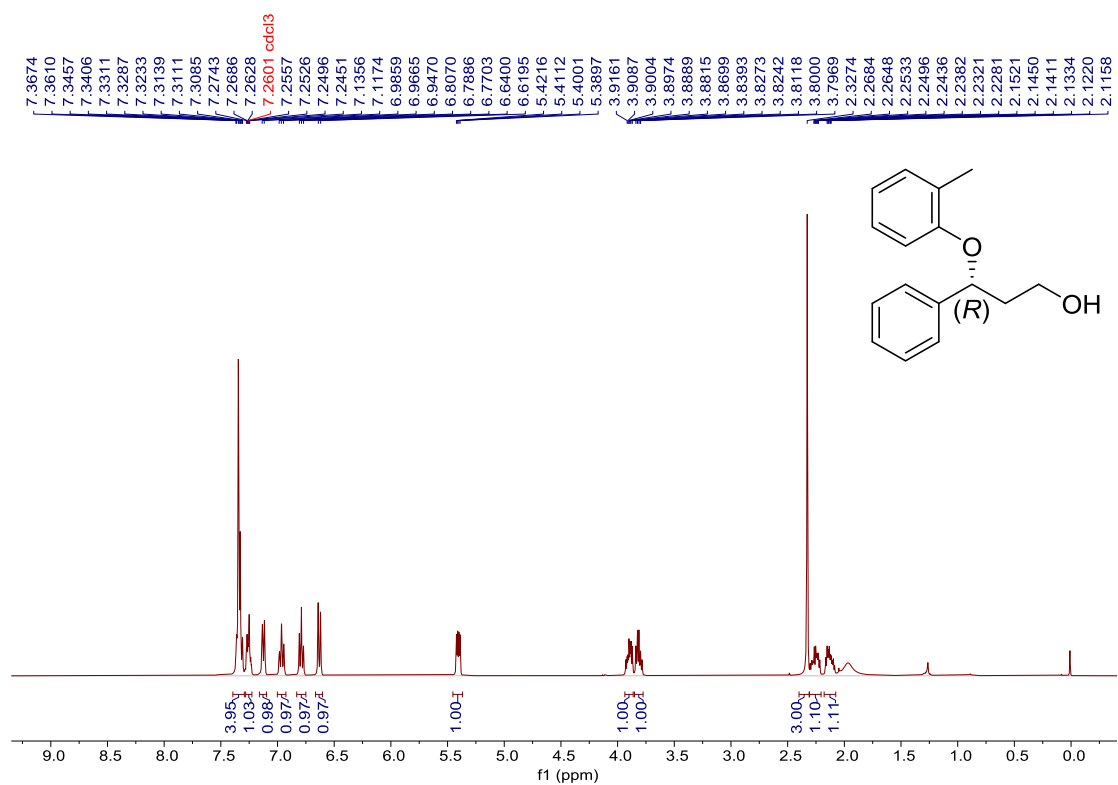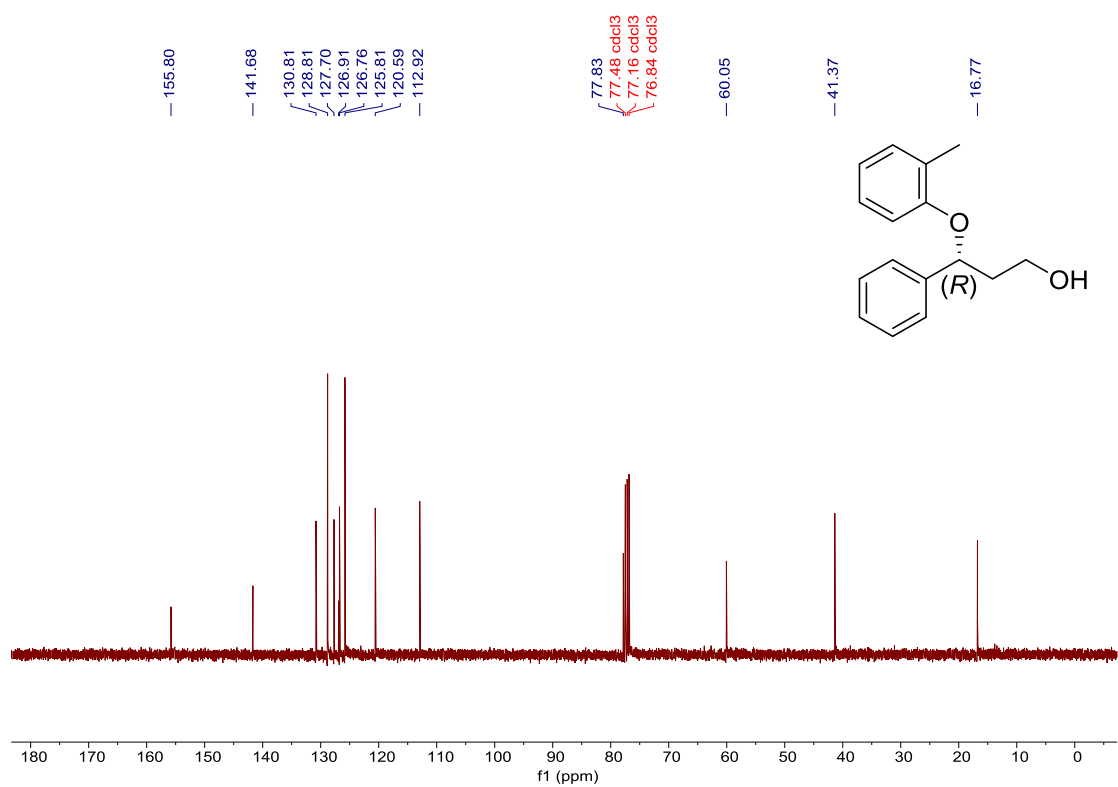

**(R)-1-phenyl-3-(4-phenyl-1H-1,2,3-triazol-1-yl)propan-1-ol [(R)-1ca]**

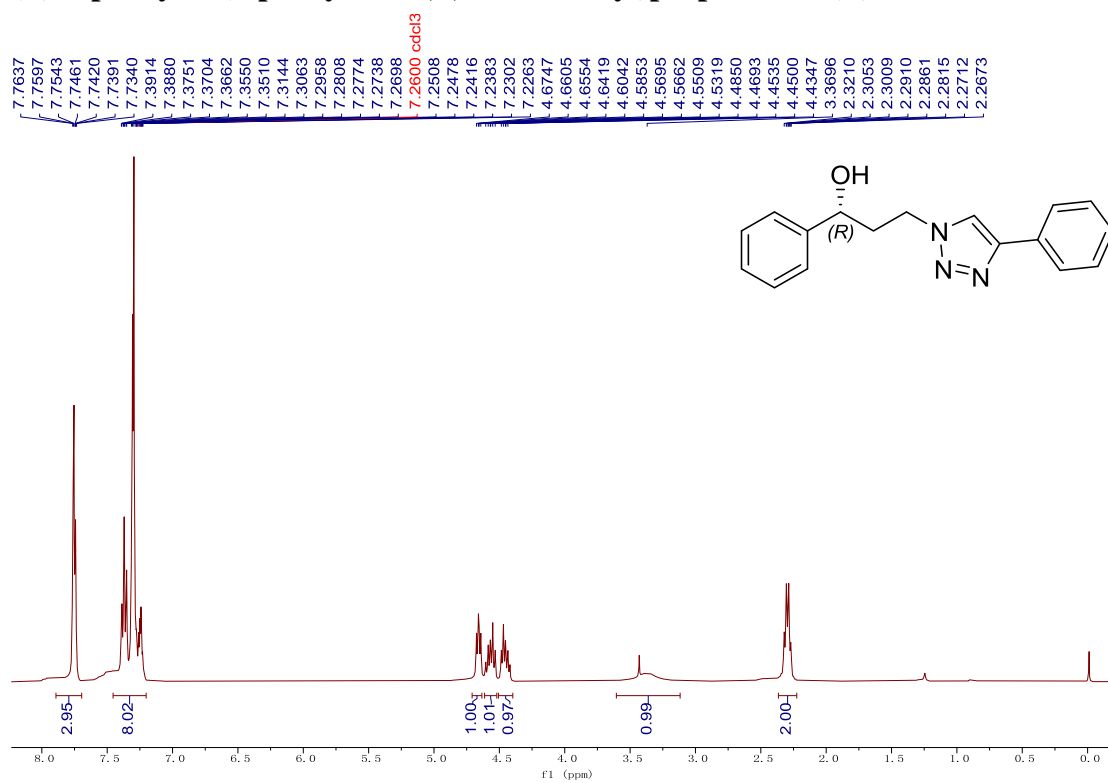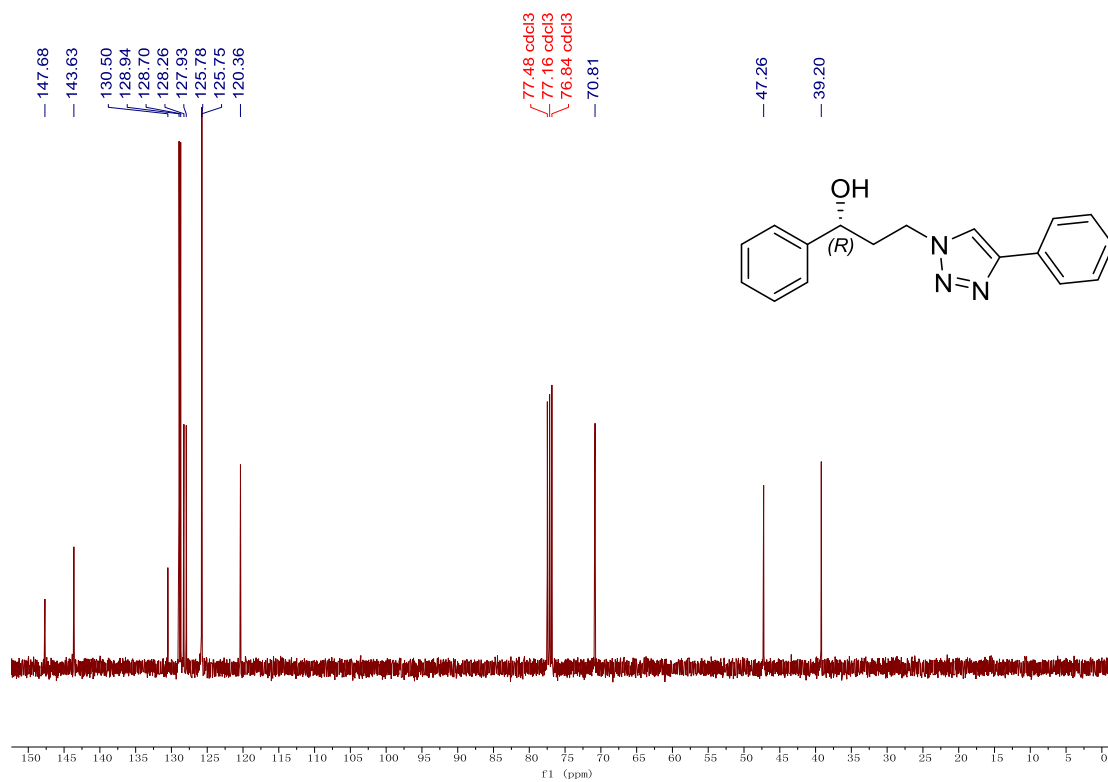

**(R)-1-(3-hydroxy-3-phenylpropyl)-5,5-dimethylazepan-2-one [(R)-1cb]**

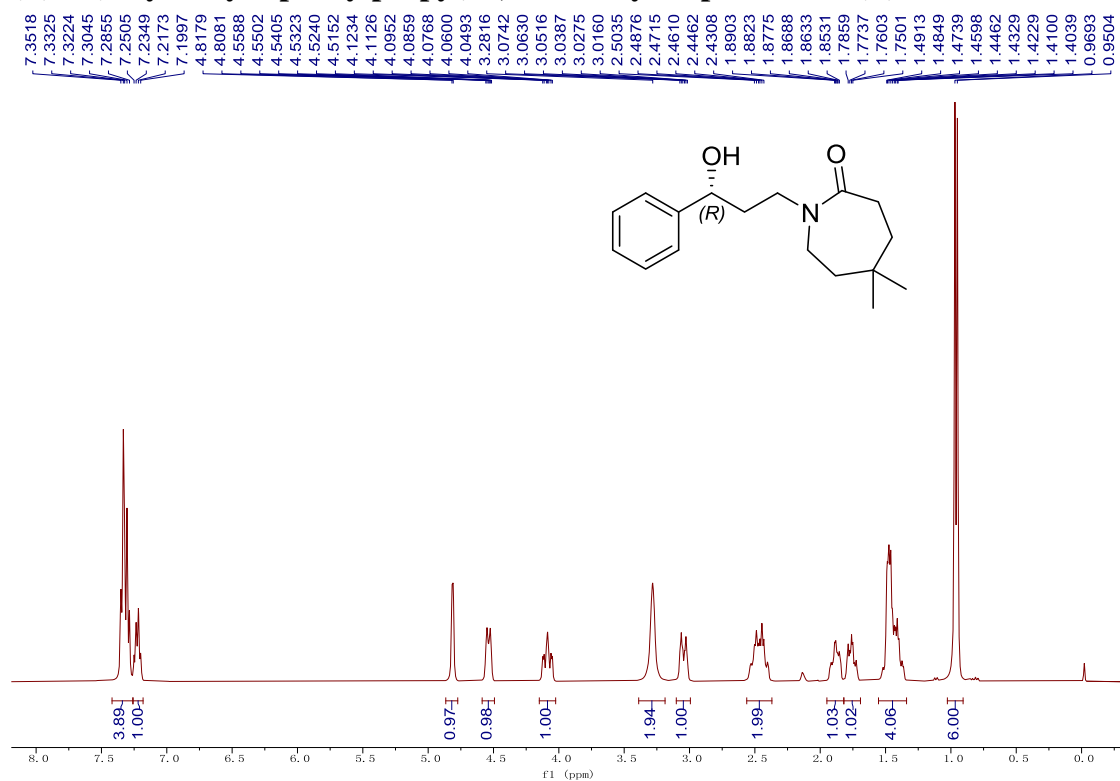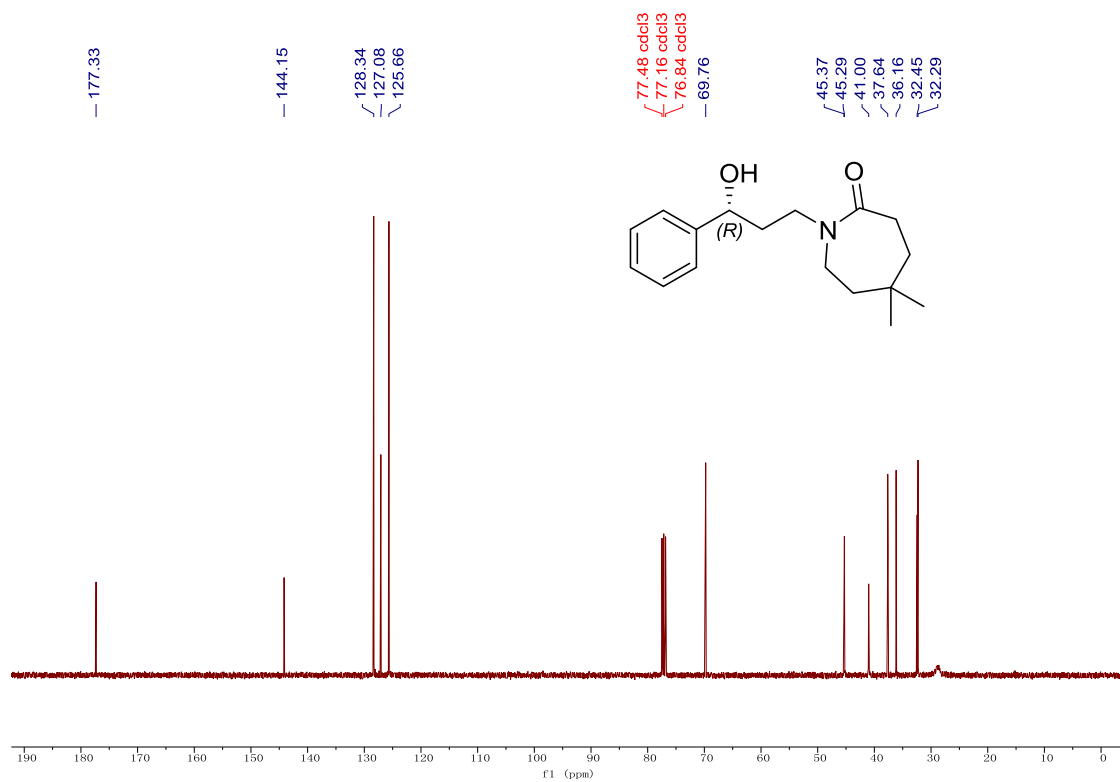



**(R)-5-phenyldihydrofuran-2(3H)-one [(R)-1da]**

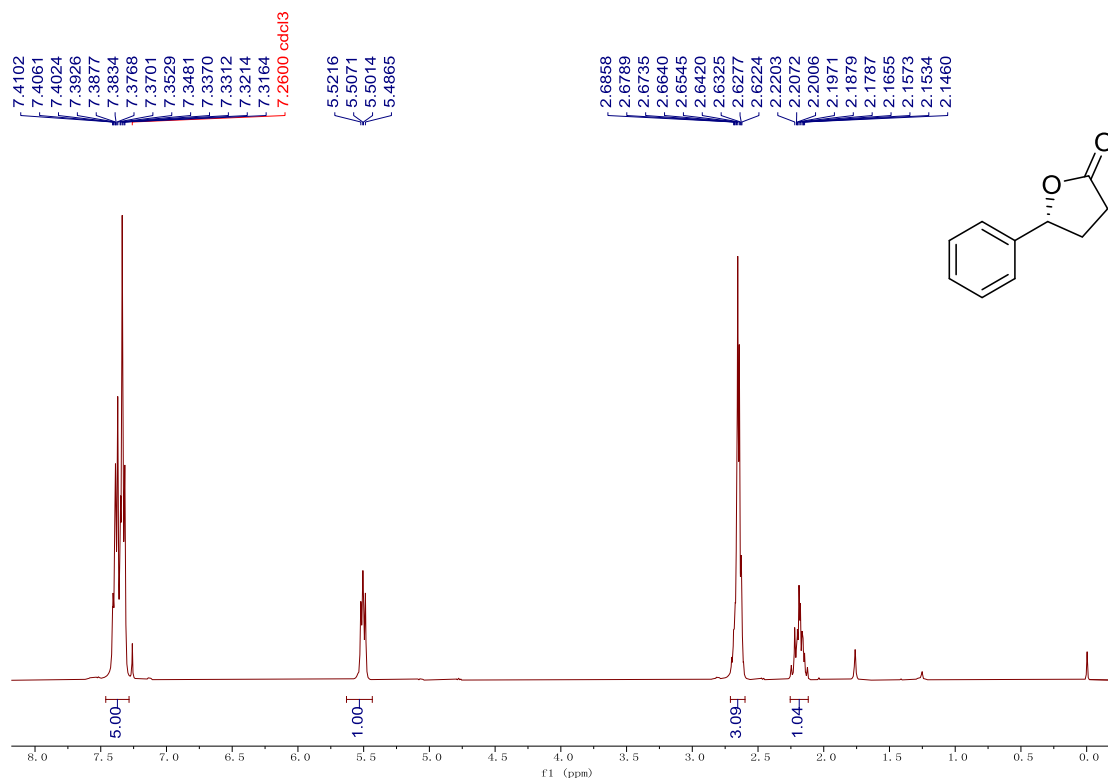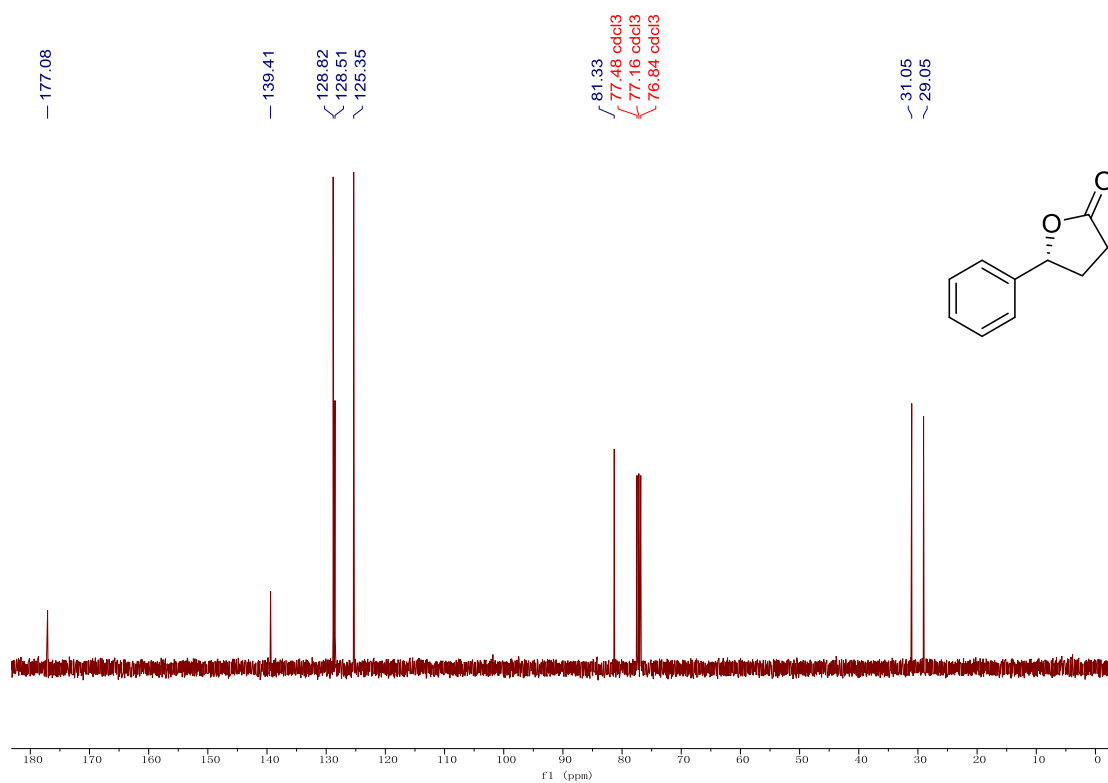

**(R)-4-hydroxy-4-phenylbutanamide [(R)-1db]**

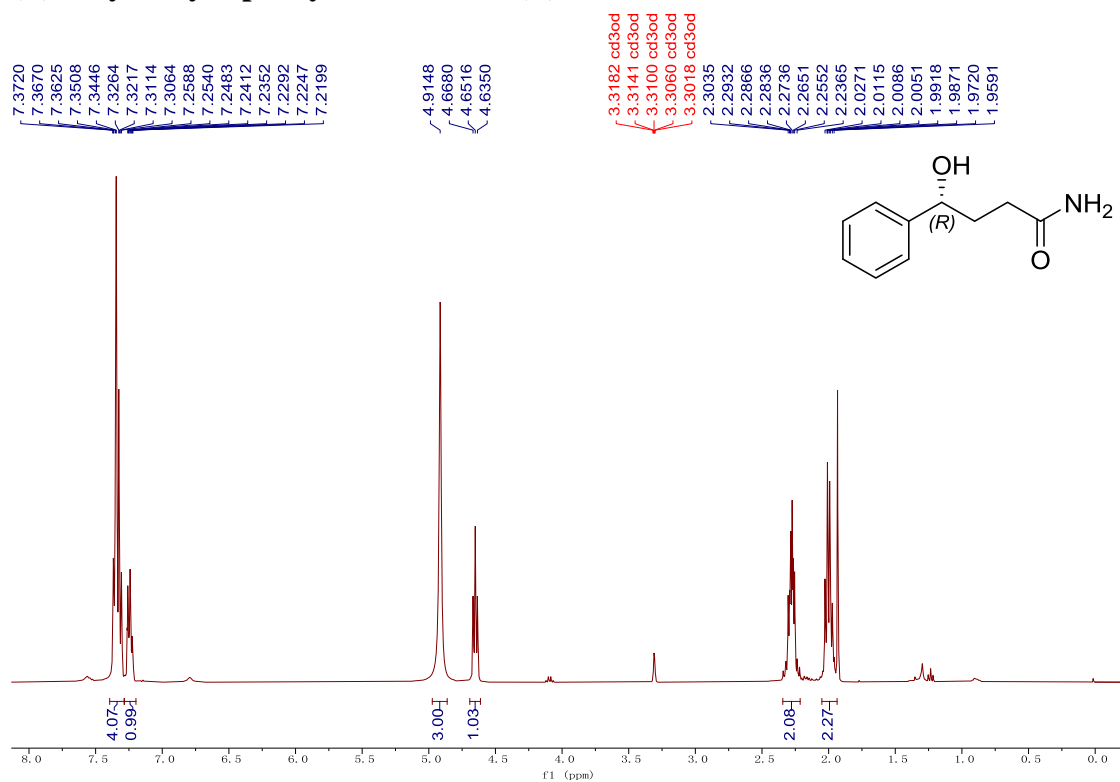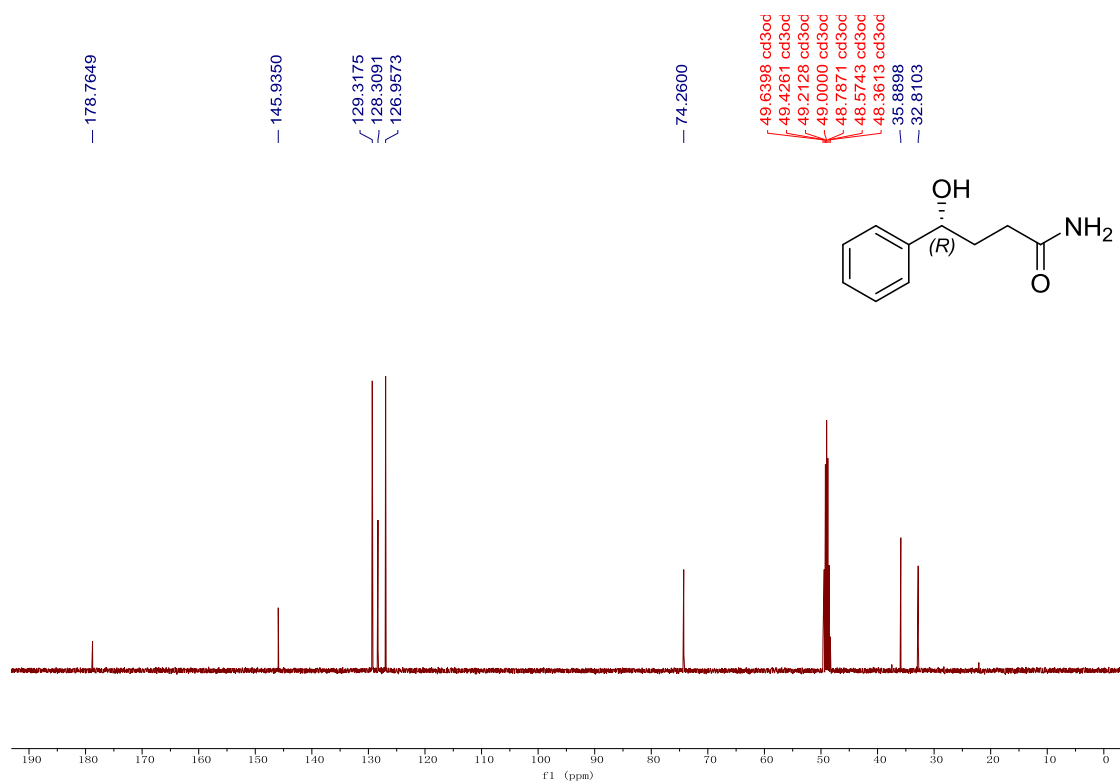

**(R)-3-amino-1-phenylpropan-1-ol [(R)-1ea]**

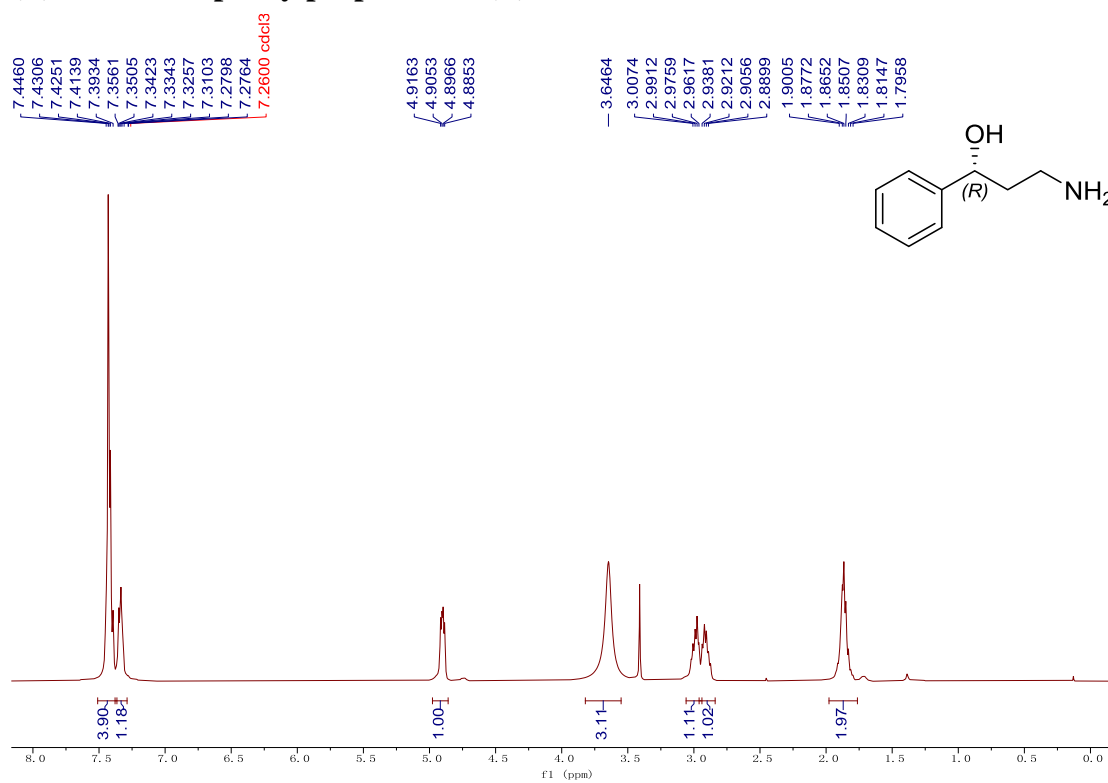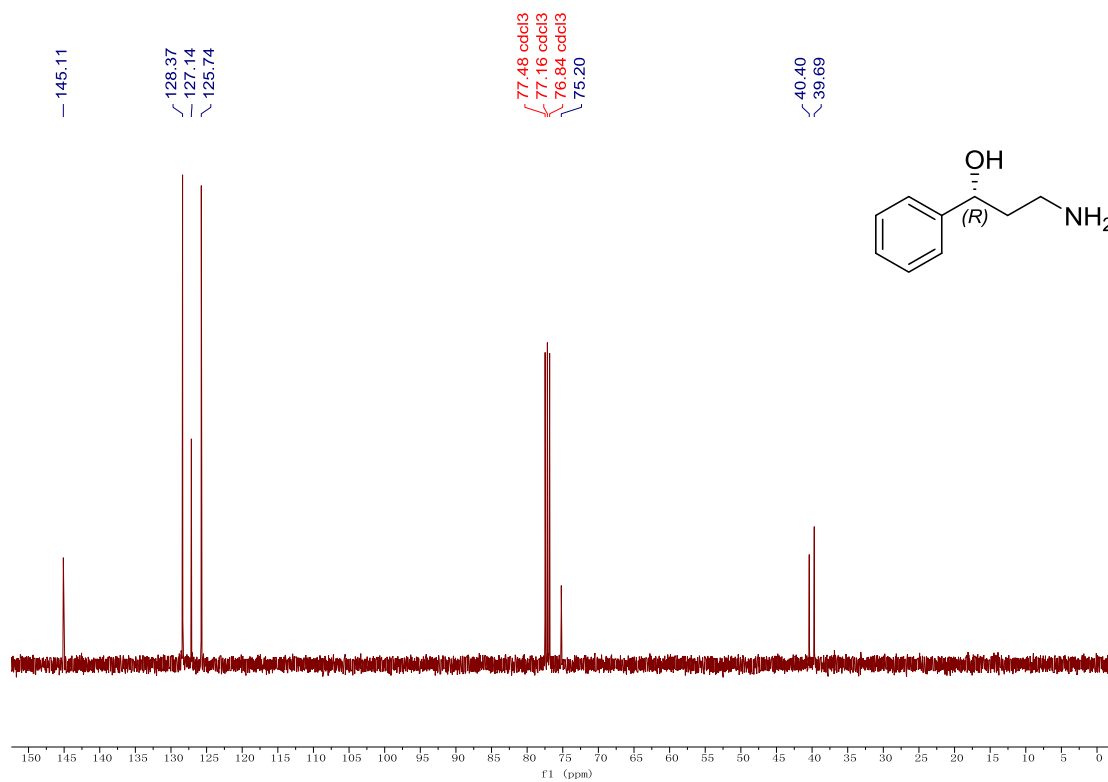

**(R)-3-hydroxy-3-phenylpropyl pivalate [(R)-1fa]**

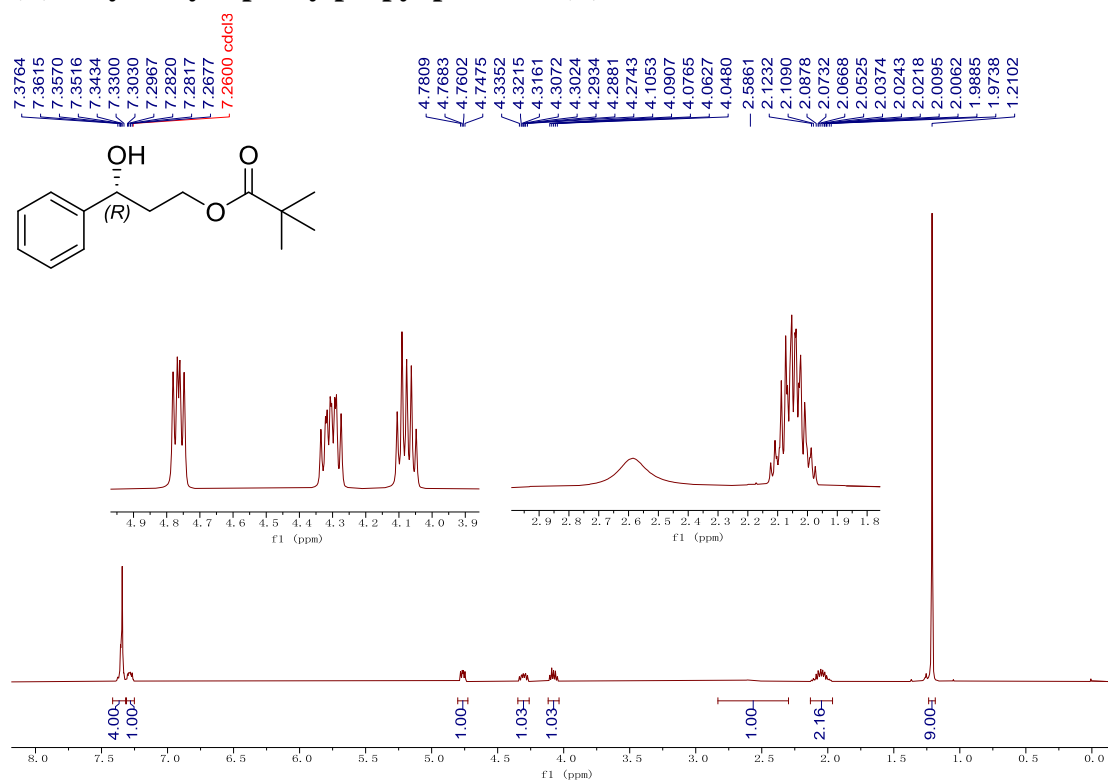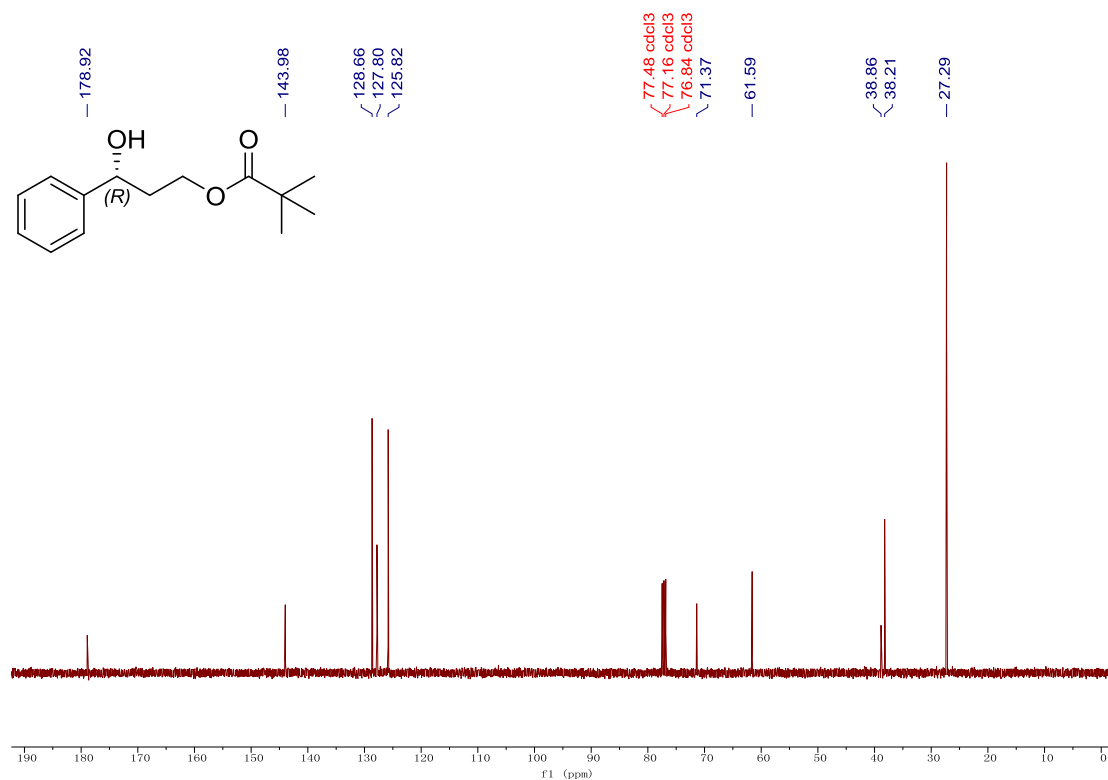

## 11. Chiral HPLC/GC Traces

Chemical synthesized (*rac*)-**1b**

mV

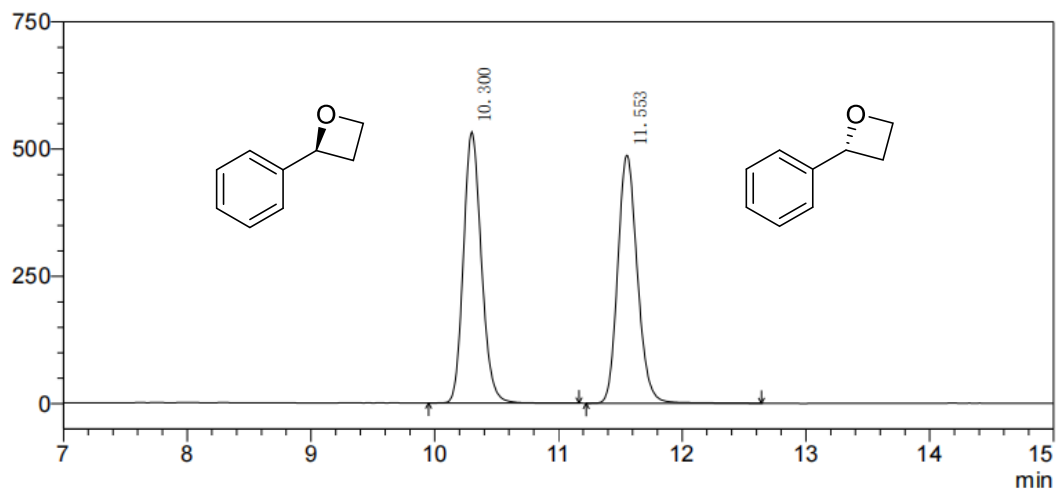

PDA 210nm

| ID# | Rt. Time | Area    | Height | Area % |
|-----|----------|---------|--------|--------|
| 1   | 10.300   | 5360586 | 532422 | 49.946 |
| 2   | 11.553   | 5372125 | 487092 | 50.054 |

Enzymatic synthesized (*R*)-**1b**

mV

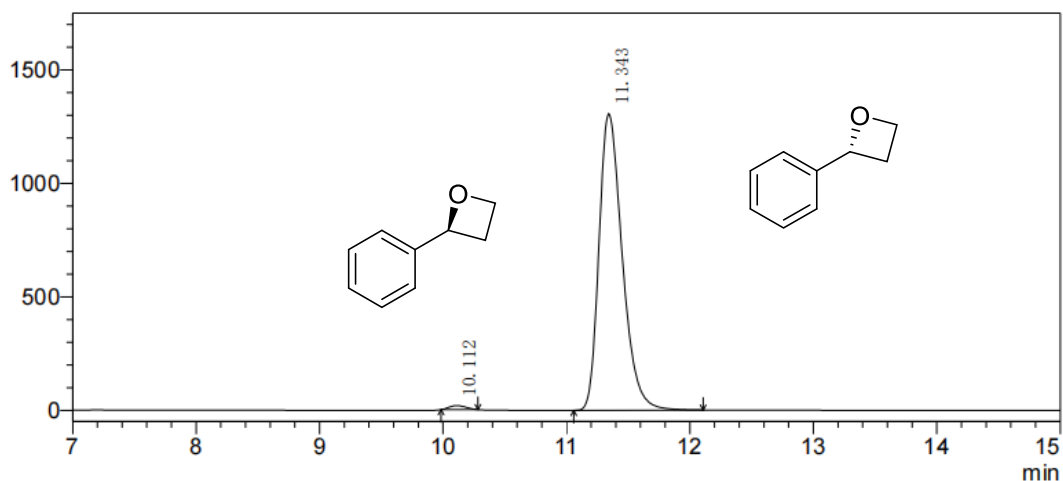

PDA 210nm

| ID# | Rt. Time | Area     | Height  | Area % |
|-----|----------|----------|---------|--------|
| 1   | 10.112   | 167593   | 17743   | 0.969  |
| 2   | 11.343   | 17132548 | 1306991 | 99.031 |

**Chiral HPLC analysis:** Diacel Chiralpak OX-3, *n*-hexane/*i*-PrOH = 97/3, flow rate 0.7 mL/min,  $\lambda$  = 210 nm,  $t_{(S)}$  = 10.1 min,  $t_{(R)}$  = 11.3 min.

Chemical synthesized (*rac*)-**2b**

mV

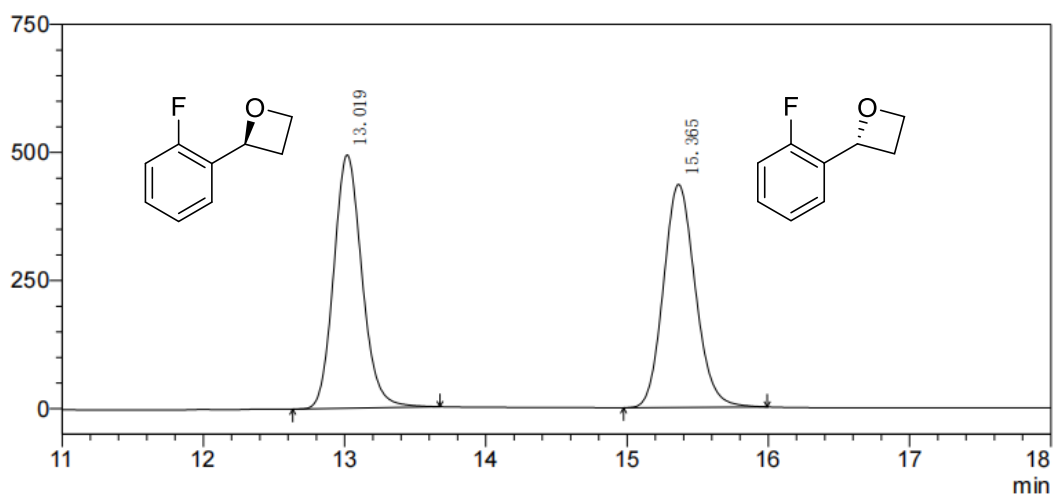

PDA 210nm

| ID# | Rt. Time | Area    | Height | Area % |
|-----|----------|---------|--------|--------|
| 1   | 13.019   | 6873612 | 494730 | 50.145 |
| 2   | 15.365   | 6833943 | 435465 | 49.855 |

Enzymatic synthesized (*R*)-**2b**

mV

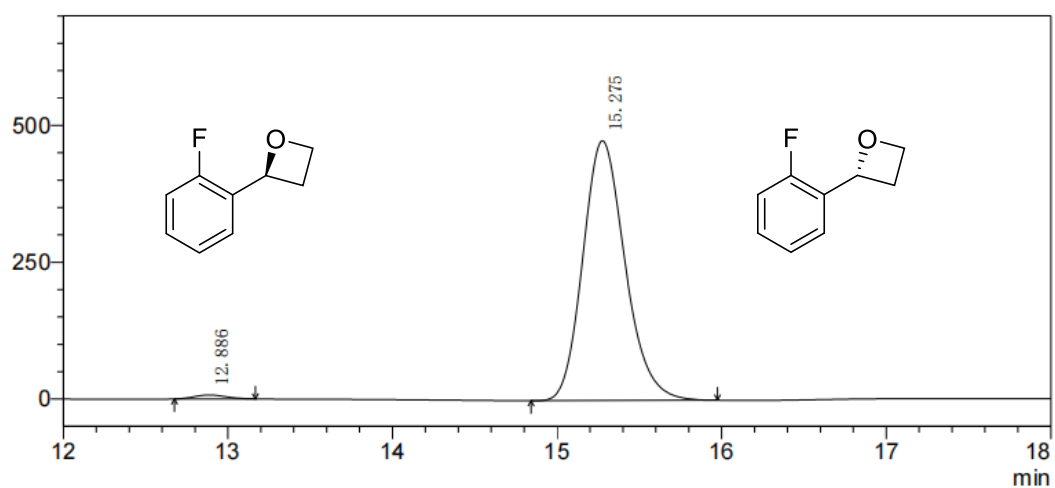

PDA 210nm

| ID# | Rt. Time | Area    | Height | Area % |
|-----|----------|---------|--------|--------|
| 1   | 12.886   | 97710   | 7238   | 1.141  |
| 2   | 15.275   | 8467016 | 474839 | 98.859 |

**Chiral HPLC analysis:** Diacel Chiralpak OX-3, *n*-hexane/*i*-PrOH = 99/1, flow rate 0.5 mL/min,  $\lambda$  = 210 nm,  $t_{(S)}$  = 12.9 min,  $t_{(R)}$  = 15.3 min.

Chemical synthesized (*rac*)-**3b**

mV

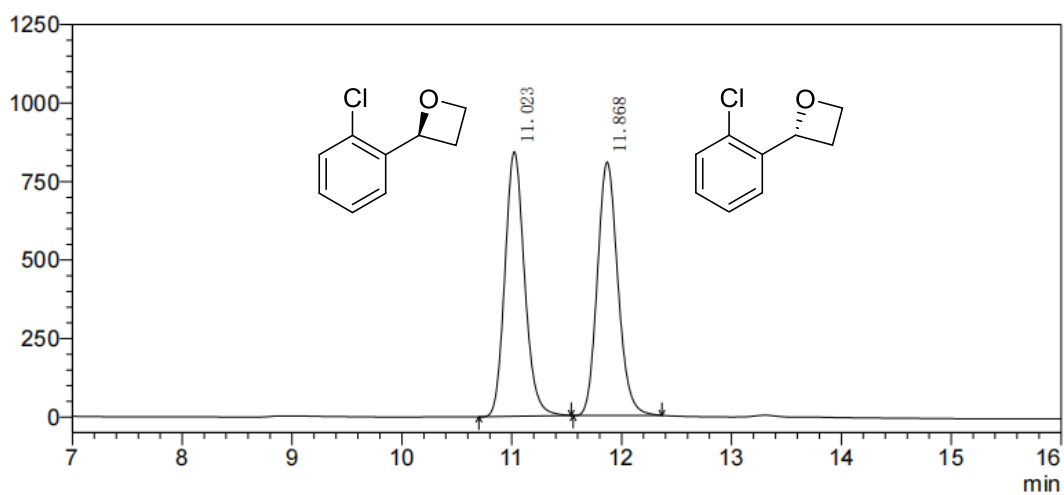

PDA 210nm

| ID# | Rt. Time | Area     | Height | Area % |
|-----|----------|----------|--------|--------|
| 1   | 11.023   | 10477966 | 842802 | 50.015 |
| 2   | 11.868   | 10471835 | 807073 | 49.985 |

Enzymatic synthesized (*R*)-**3b**

mV

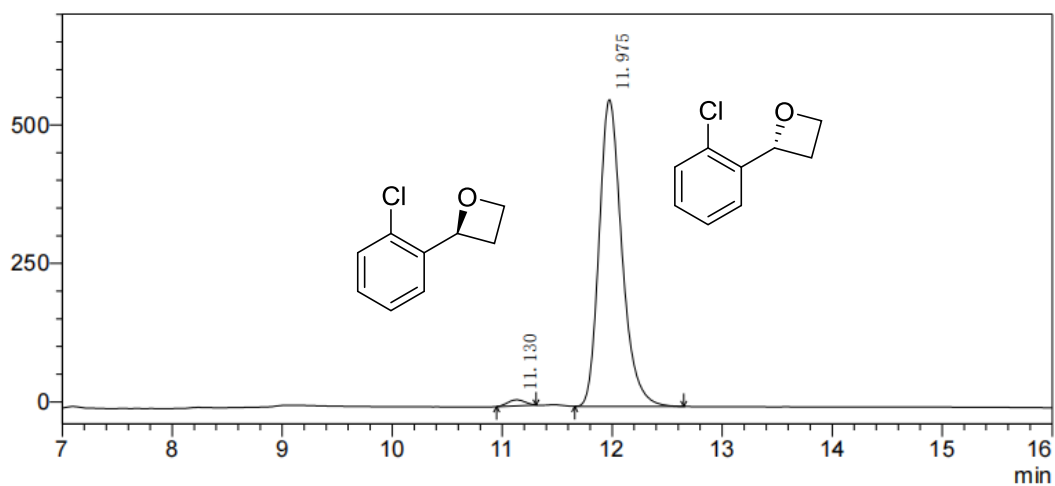

PDA 210nm

| ID# | Rt. Time | Area    | Height | Area % |
|-----|----------|---------|--------|--------|
| 1   | 11.130   | 118531  | 10775  | 1.463  |
| 2   | 11.975   | 7981297 | 553990 | 98.537 |

**Chiral HPLC analysis:** Diacel Chiralpak OX-3, *n*-hexane/*i*-PrOH = 99/1, flow rate 0.5 mL/min,  $\lambda$  = 210 nm,  $t_{(S)}$  = 11.1 min,  $t_{(R)}$  = 12.0 min.

Chemical synthesized (*rac*)-**4b**

mV

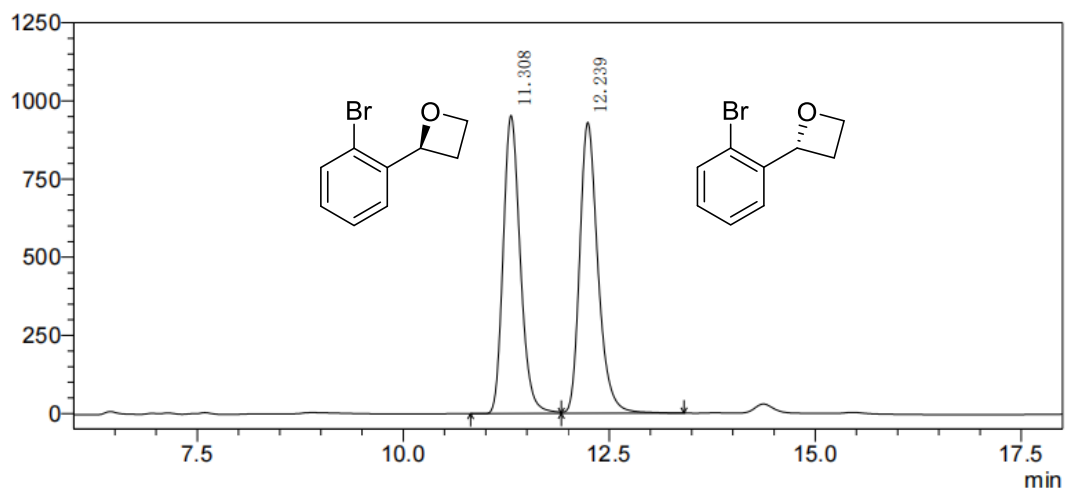

PDA 210nm

| ID# | Rt. Time | Area     | Height | Area % |
|-----|----------|----------|--------|--------|
| 1   | 11.308   | 13680017 | 952846 | 48.911 |
| 2   | 12.239   | 14289030 | 930444 | 51.089 |

Enzymatic synthesized (*R*)-**4b**

mV

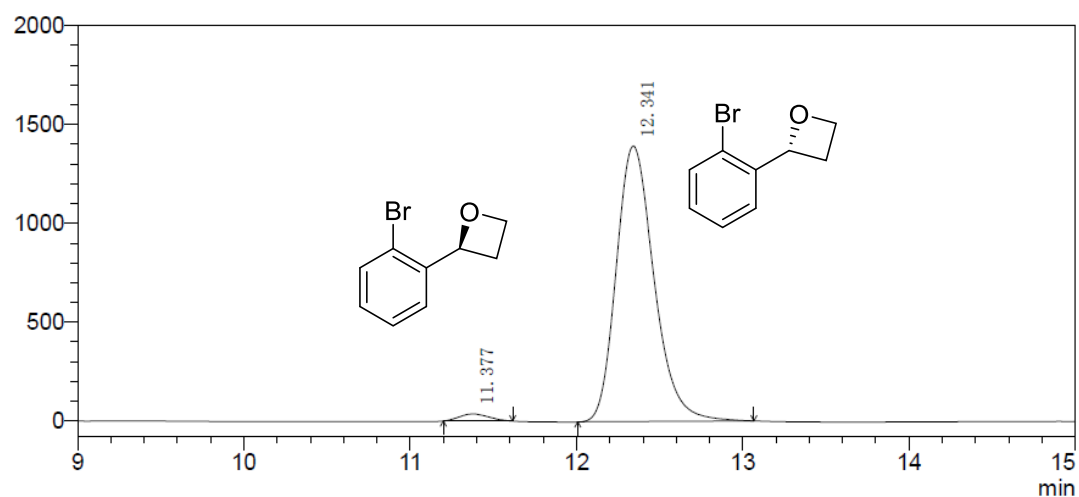

PDA 210nm

| ID# | Rt. Time | Area     | Height  | Area % |
|-----|----------|----------|---------|--------|
| 1   | 11.377   | 435422   | 35585   | 1.935  |
| 2   | 12.341   | 22070085 | 1395365 | 98.065 |

**Chiral HPLC analysis:** Diacel Chiralpak OX-3, *n*-hexane/*i*-PrOH = 99/1, flow rate 0.5 mL/min,  $\lambda$  = 210 nm,  $t_{(S)}$  = 11.4 min,  $t_{(R)}$  = 12.3 min.



Chemical synthesized (*rac*)-**5b**

mV

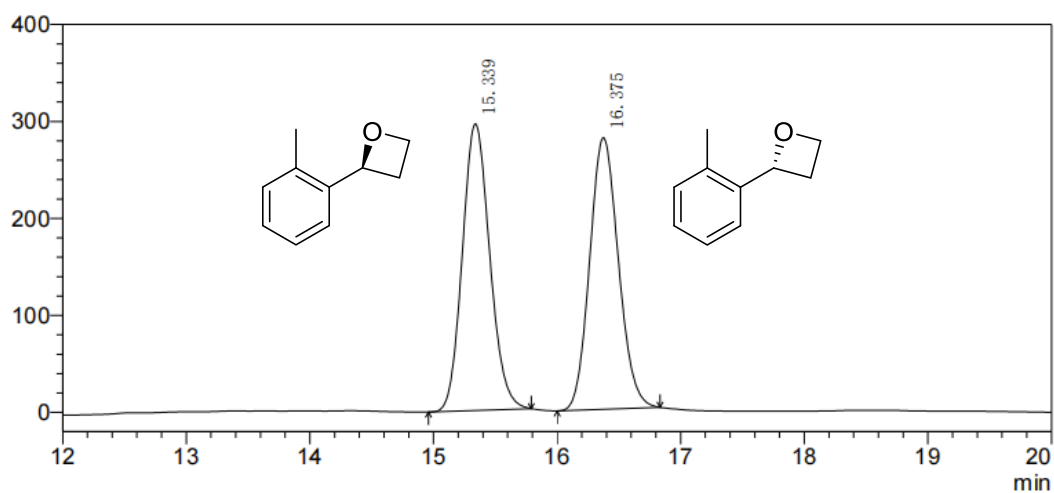

PDA 210nm

| ID# | Rt. Time | Area    | Height | Area % |
|-----|----------|---------|--------|--------|
| 1   | 15.339   | 4557692 | 295629 | 50.171 |
| 2   | 16.375   | 4526543 | 280296 | 49.829 |

Enzymatic synthesized (*R*)-**5b**

mV

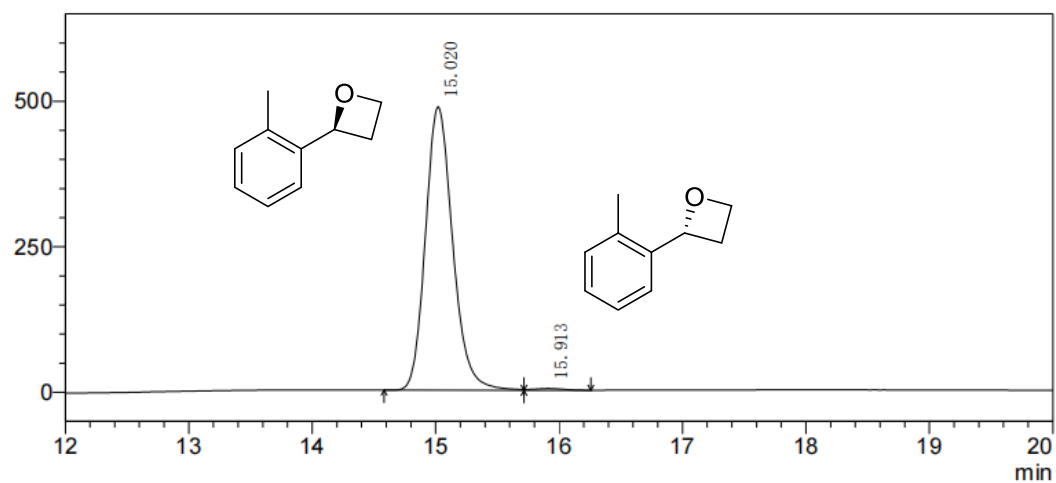

PDA 210nm

| ID# | Rt. Time | Area    | Height | Area % |
|-----|----------|---------|--------|--------|
| 1   | 15.020   | 7469458 | 486657 | 99.376 |
| 2   | 15.913   | 46869   | 2909   | 0.624  |

**Chiral HPLC analysis:** Diacel Chiralpak OX-3, *n*-hexane/*i*-PrOH = 99/1, flow rate 0.5 mL/min,  $\lambda$  = 210 nm,  $t_{(R)}$  = 15.0 min,  $t_{(S)}$  = 15.9 min.

Chemical synthesized (*rac*)-**6b**

mV

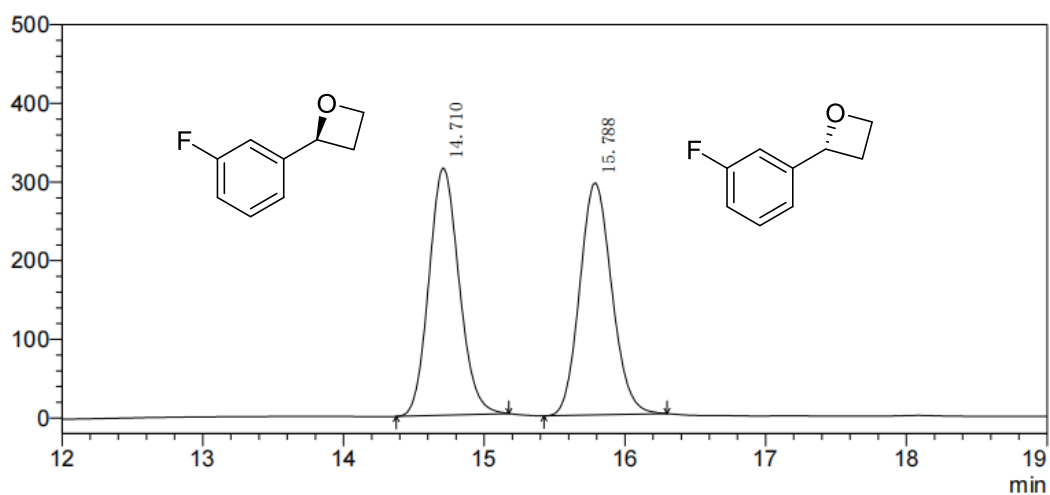

PDA 210nm

| ID# | Rt. Time | Area    | Height | Area % |
|-----|----------|---------|--------|--------|
| 1   | 14.710   | 4685654 | 314313 | 50.058 |
| 2   | 15.788   | 4674777 | 294836 | 49.942 |

Enzymatic synthesized (*R*)-**6b**

mV

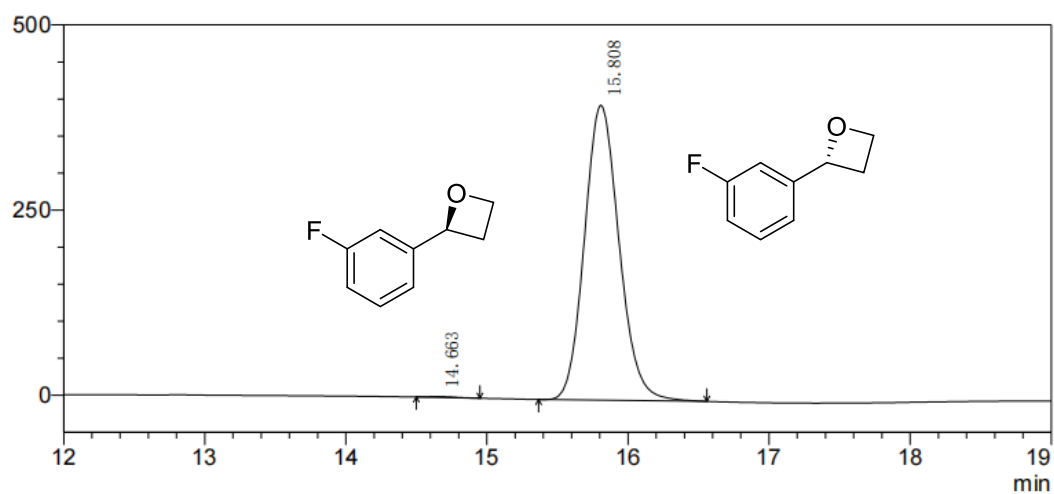

PDA 210nm

| ID# | Rt. Time | Area    | Height | Area % |
|-----|----------|---------|--------|--------|
| 1   | 14.663   | 13409   | 987    | 0.197  |
| 2   | 15.808   | 6797786 | 398108 | 99.803 |

**Chiral HPLC analysis:** Diacel Chiralpak OX-3, *n*-hexane/*i*-PrOH = 99/1, flow rate 0.5 mL/min,  $\lambda$  = 210 nm,  $t_{(S)}$  = 14.7 min,  $t_{(R)}$  = 15.8 min.

Chemical synthesized (*rac*)-**7b**

mV

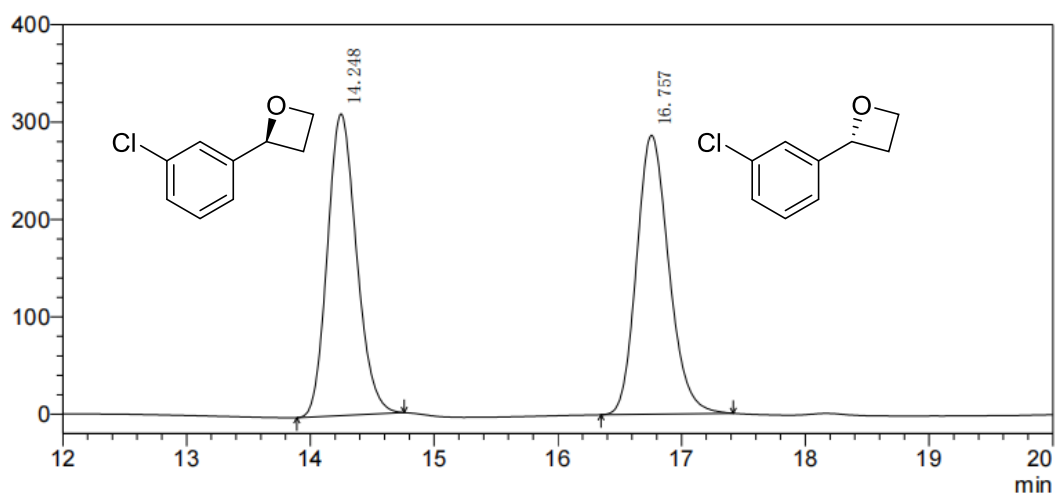

PDA 210nm

| ID# | Rt. Time | Area    | Height | Area % |
|-----|----------|---------|--------|--------|
| 1   | 14.248   | 5071931 | 309698 | 49.402 |
| 2   | 16.757   | 5194628 | 286570 | 50.598 |

Enzymatic synthesized (*R*)-**7b**

mV

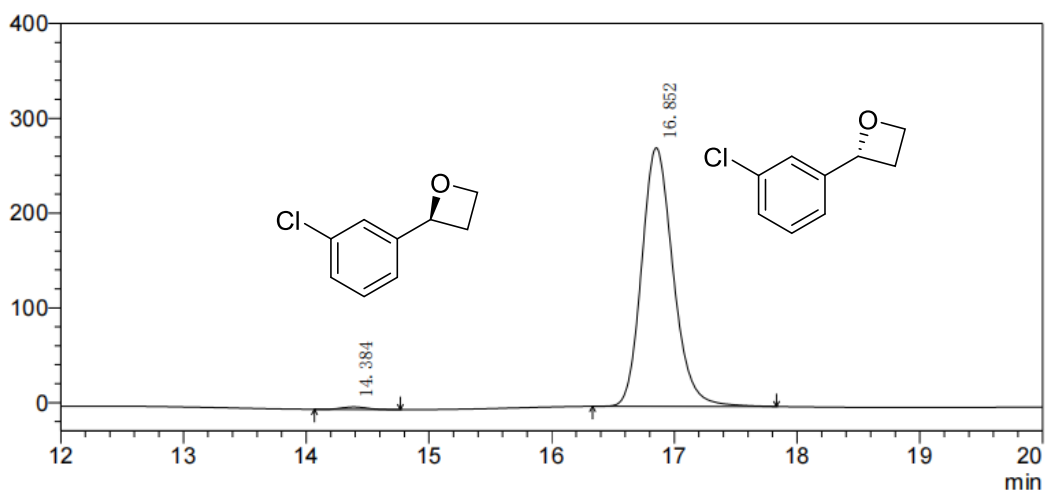

PDA 210nm

| ID# | Rt. Time | Area    | Height | Area % |
|-----|----------|---------|--------|--------|
| 1   | 14.384   | 38653   | 2672   | 0.789  |
| 2   | 16.852   | 4862444 | 272960 | 99.211 |

**Chiral HPLC analysis:** Diacel Chiralpak OX-3, *n*-hexane/*i*-PrOH = 99/1, flow rate 0.5 mL/min,  $\lambda = 210$  nm,  $t_{(S)} = 14.4$  min,  $t_{(R)} = 16.9$  min.

Chemical synthesized (*rac*)-**8b**

mV

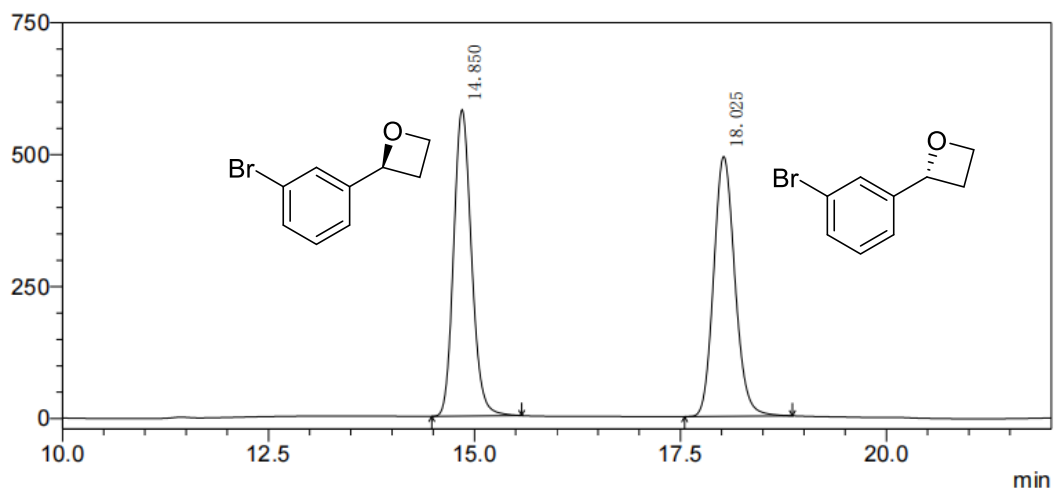

PDA 210nm

| ID# | Rt. Time | Area    | Height | Area % |
|-----|----------|---------|--------|--------|
| 1   | 14.850   | 8738172 | 580656 | 49.772 |
| 2   | 18.025   | 8818386 | 492475 | 50.228 |

Enzymatic synthesized (*R*)-**8b**

mV

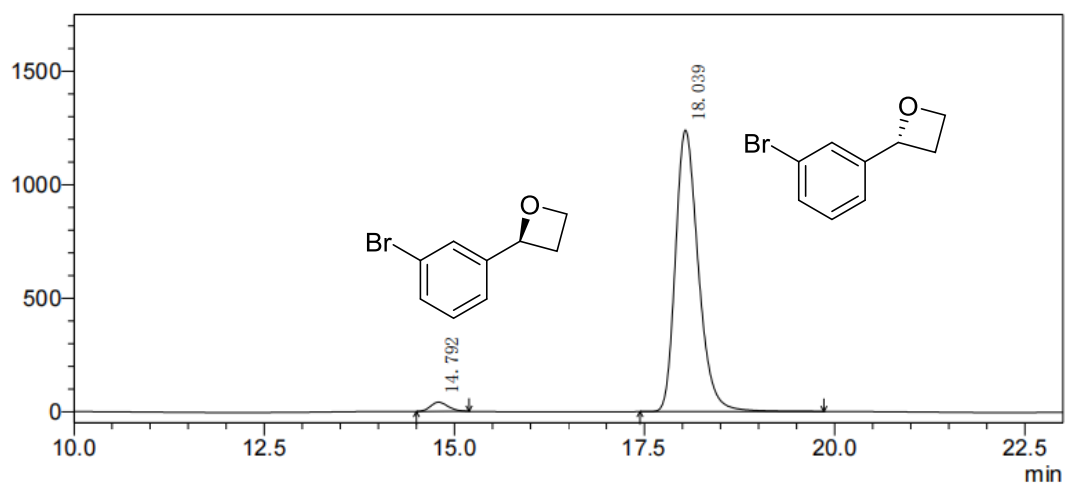

PDA 210nm

| ID# | Rt. Time | Area     | Height  | Area % |
|-----|----------|----------|---------|--------|
| 1   | 14.792   | 651484   | 40578   | 2.453  |
| 2   | 18.039   | 25907514 | 1240476 | 97.547 |

**Chiral HPLC analysis:** Diacel Chiralpak OX-3, *n*-hexane/*i*-PrOH = 99/1, flow rate 0.5 mL/min,  $\lambda$  = 210 nm,  $t_{(S)}$  = 14.8 min,  $t_{(R)}$  = 18.0 min.

Chemical synthesized (*rac*)-**9b**

mV

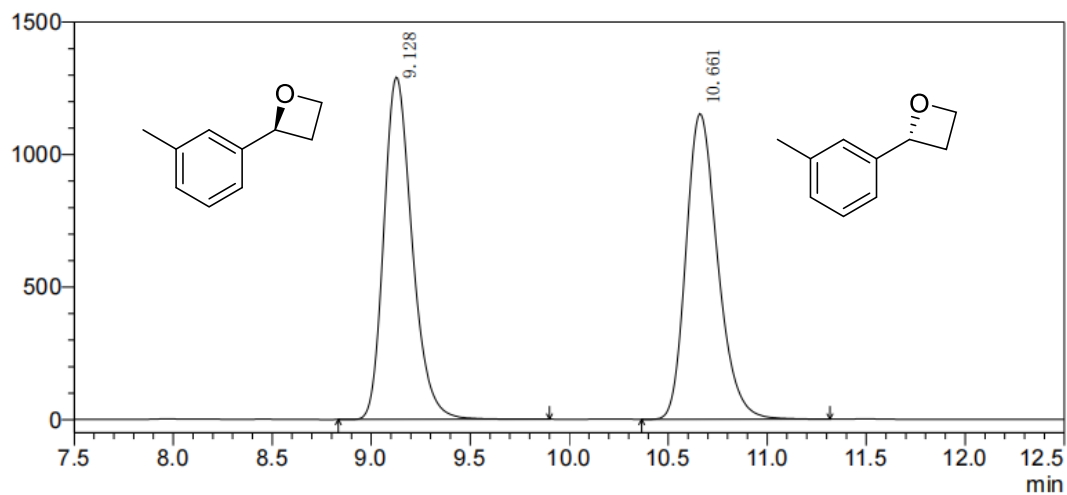

PDA 210nm

| ID# | Rt. Time | Area     | Height  | Area % |
|-----|----------|----------|---------|--------|
| 1   | 9.128    | 12828043 | 1292176 | 49.921 |
| 2   | 10.661   | 12868475 | 1153061 | 50.079 |

Enzymatic synthesized (*R*)-**9b**

mV

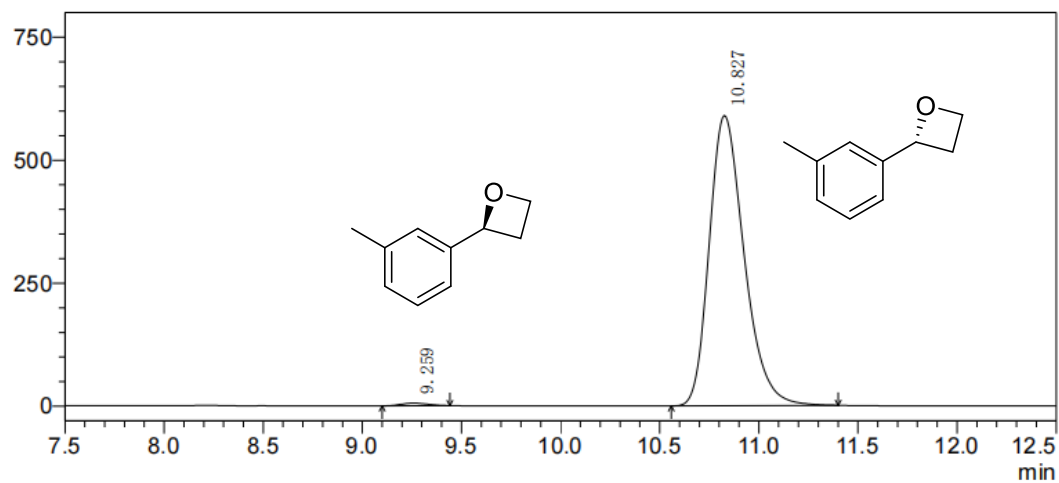

PDA 210nm

| ID# | Rt. Time | Area    | Height | Area % |
|-----|----------|---------|--------|--------|
| 1   | 9.259    | 51142   | 5351   | 0.704  |
| 2   | 10.827   | 7214380 | 590021 | 99.296 |

**Chiral HPLC analysis:** Diacel Chiralpak OX-3, *n*-hexane/*i*-PrOH = 97/3, flow rate 0.7 mL/min,  $\lambda$  = 210 nm,  $t_{(S)}$  = 9.3 min,  $t_{(R)}$  = 10.8 min.

Chemical synthesized (*rac*)-**10b**

mV

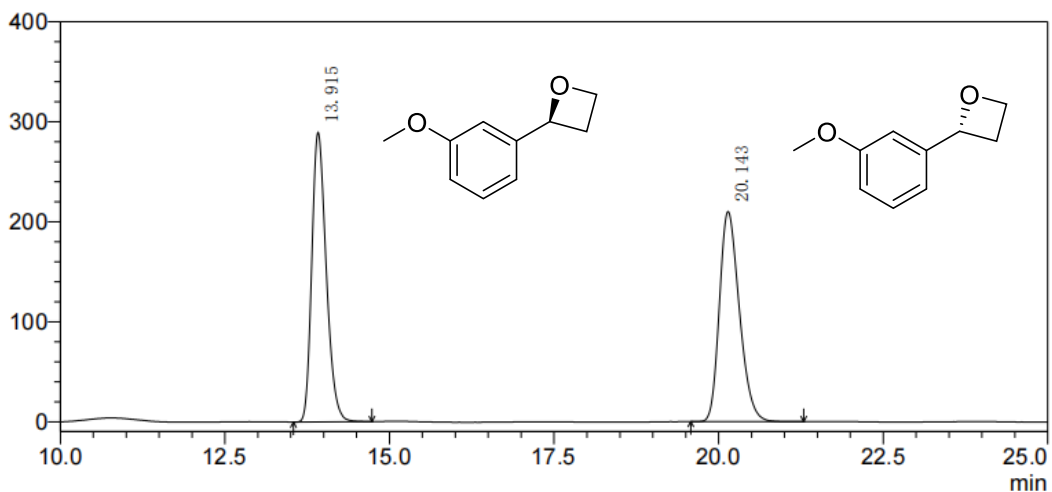

PDA 210nm

| ID# | Rt. Time | Area    | Height | Area % |
|-----|----------|---------|--------|--------|
| 1   | 13.915   | 4392816 | 289673 | 49.937 |
| 2   | 20.143   | 4403967 | 210165 | 50.063 |

Enzymatic synthesized (*R*)-**10b**

mV

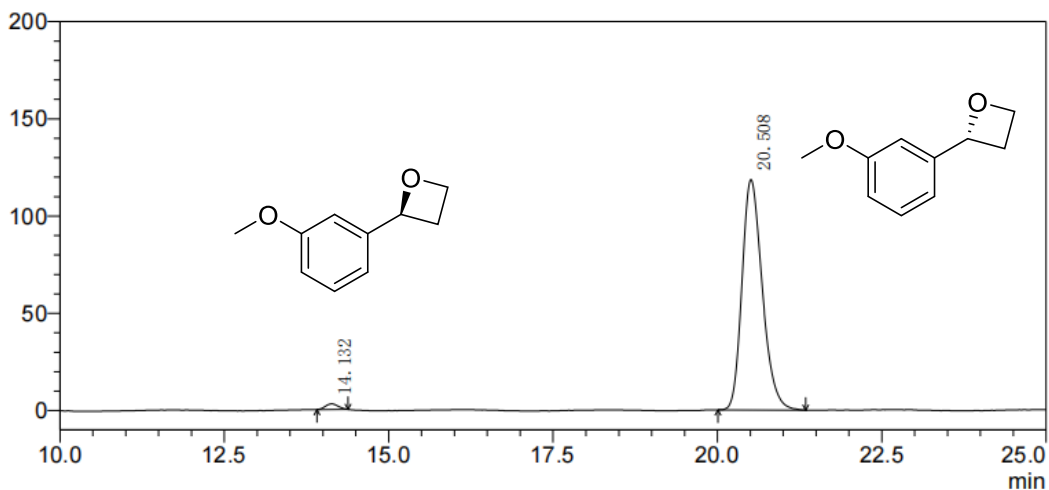

PDA 210nm

| ID# | Rt. Time | Area    | Height | Area % |
|-----|----------|---------|--------|--------|
| 1   | 14.132   | 39118   | 2913   | 1.512  |
| 2   | 20.508   | 2547915 | 118524 | 98.488 |

**Chiral HPLC analysis:** Diacel Chiralpak OX-3, *n*-hexane/*i*-PrOH = 97/3, flow rate 0.7 mL/min,  $\lambda$  = 210 nm,  $t_{(S)}$  = 14.1 min,  $t_{(R)}$  = 20.5 min.

Chemical synthesized (*rac*)-**11b**

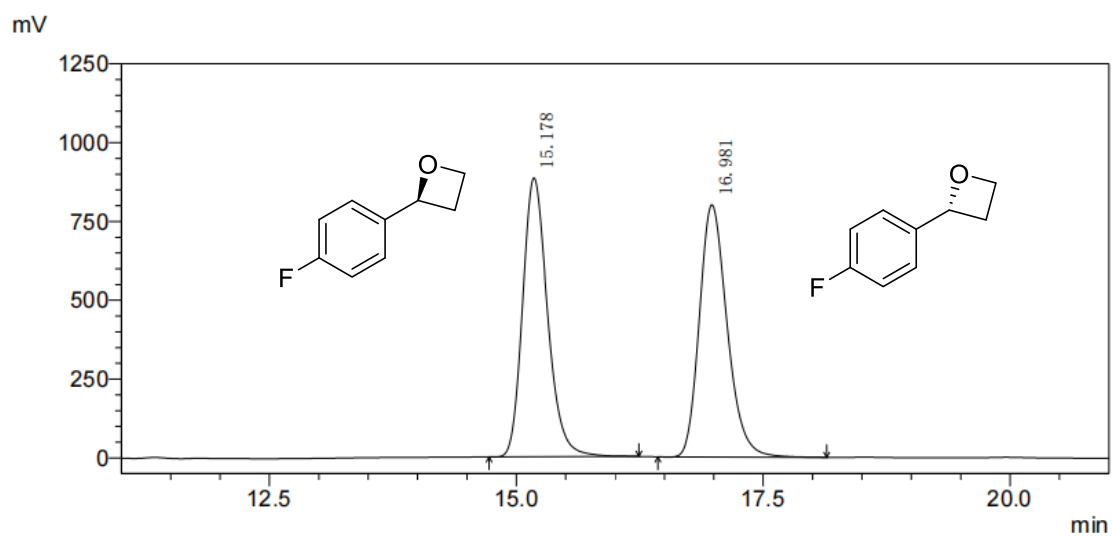

| PDA 210nm |          |          |        |        |
|-----------|----------|----------|--------|--------|
| ID#       | Rt. Time | Area     | Height | Area % |
| 1         | 15.178   | 15574056 | 884420 | 49.968 |
| 2         | 16.981   | 15594051 | 800141 | 50.032 |

Enzymatic synthesized (*R*)-**11b**

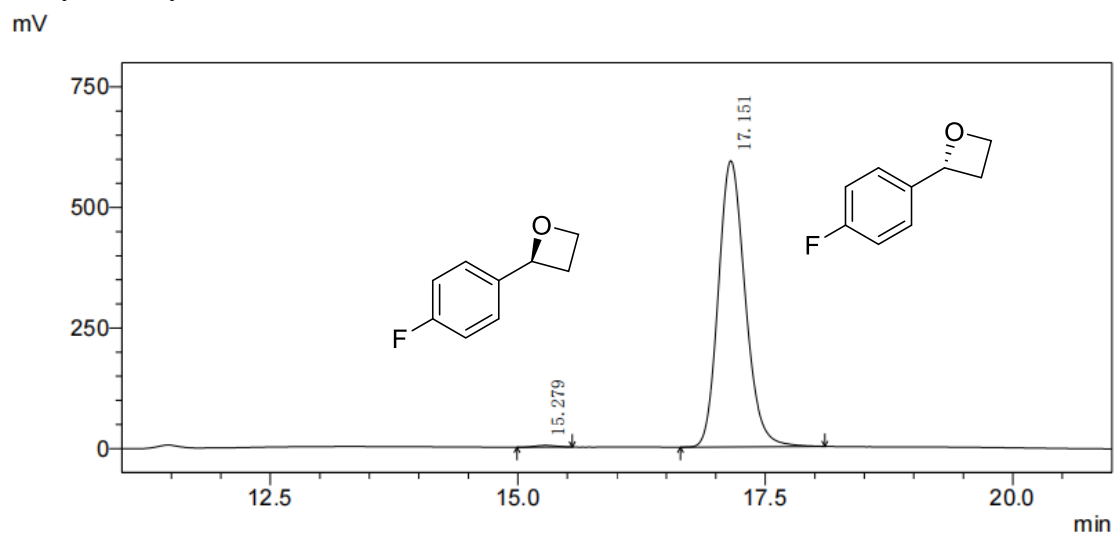

| PDA 210nm |          |          |        |        |
|-----------|----------|----------|--------|--------|
| ID#       | Rt. Time | Area     | Height | Area % |
| 1         | 15.279   | 53961    | 3636   | 0.481  |
| 2         | 17.151   | 11156067 | 593498 | 99.519 |

**Chiral HPLC analysis:** Diacel Chiralpak OX-3, n-hexane/i-PrOH = 99/1, flow rate 0.5 mL/min,  $\lambda = 210$  nm,  $t_{(S)} = 15.3$  min,  $t_{(R)} = 17.2$  min.

Chemical synthesized (*rac*)-**12b**

mV

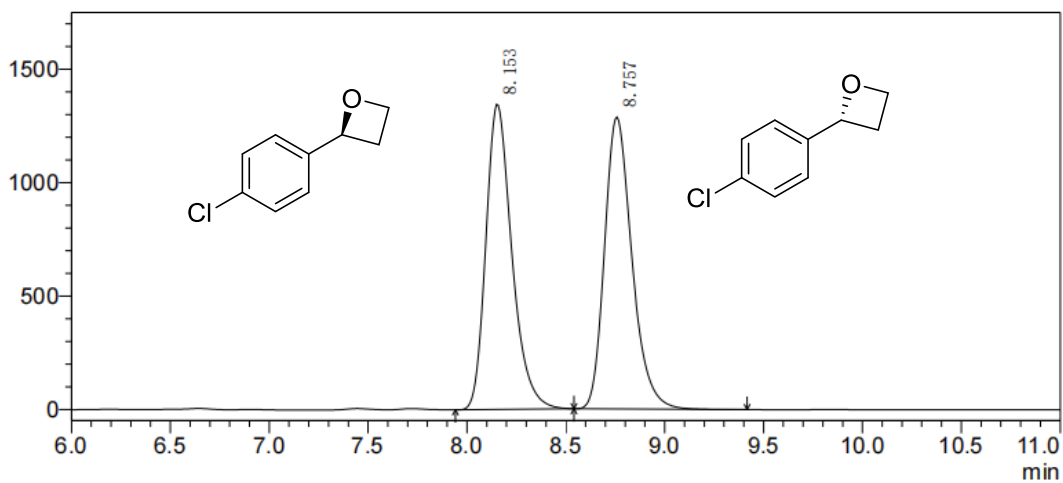

PDA 210nm

| ID# | Rt. Time | Area     | Height  | Area % |
|-----|----------|----------|---------|--------|
| 1   | 8.153    | 12371846 | 1346303 | 49.976 |
| 2   | 8.757    | 12383649 | 1287291 | 50.024 |

Enzymatic synthesized (*R*)-**12b**

mV

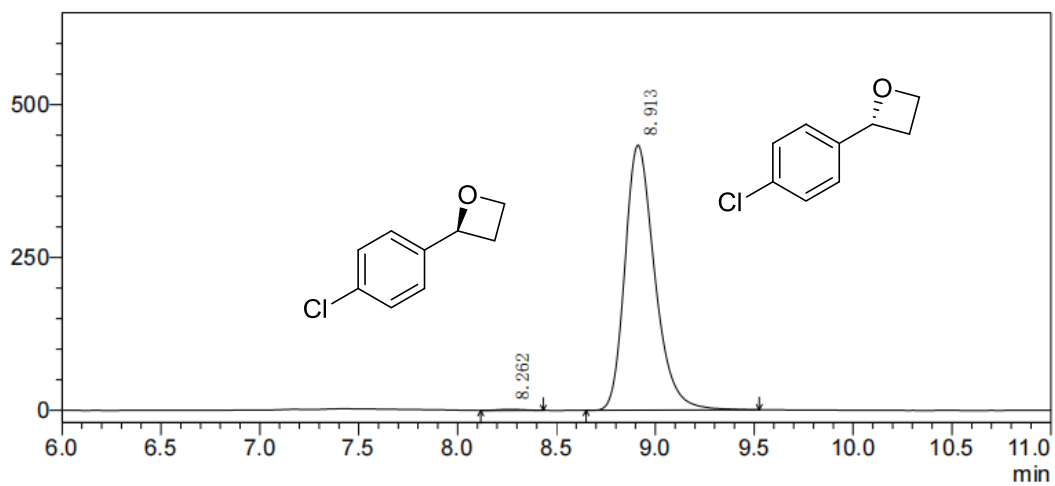

PDA 210nm

| ID# | Rt. Time | Area    | Height | Area % |
|-----|----------|---------|--------|--------|
| 1   | 8.262    | 14945   | 1670   | 0.327  |
| 2   | 8.913    | 4557735 | 432774 | 99.673 |

**Chiral HPLC analysis:** Diacel Chiralpak OX-3, *n*-hexane/*i*-PrOH = 97/3, flow rate 0.7 mL/min,  $\lambda$  = 210 nm,  $t_{(S)}$  = 8.3 min,  $t_{(R)}$  = 8.9 min.



Chemical synthesized (*rac*)-**13b**

mV

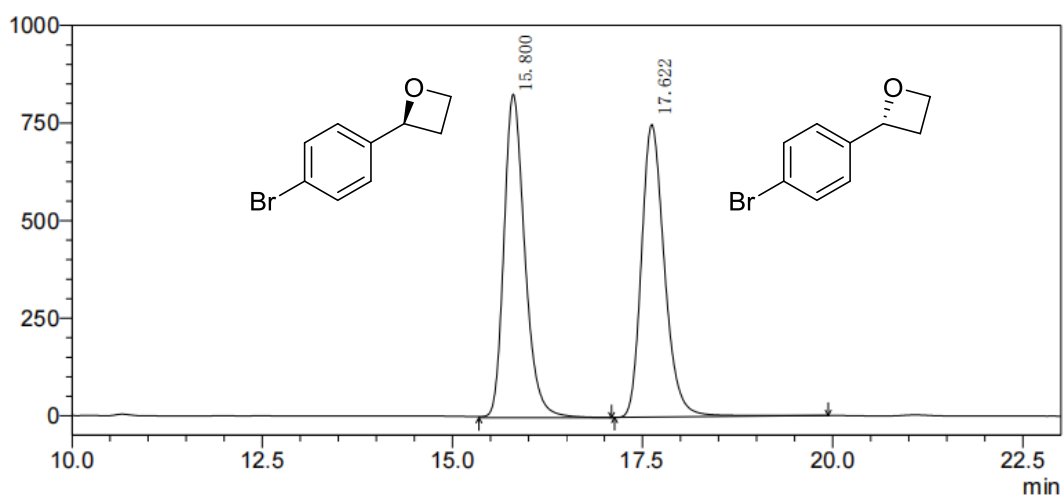

PDA 210nm

| ID# | Rt. Time | Area     | Height | Area % |
|-----|----------|----------|--------|--------|
| 1   | 15.800   | 15794861 | 828061 | 49.964 |
| 2   | 17.622   | 15817622 | 749364 | 50.036 |

Enzymatic synthesized (*R*)-**13b**

mV

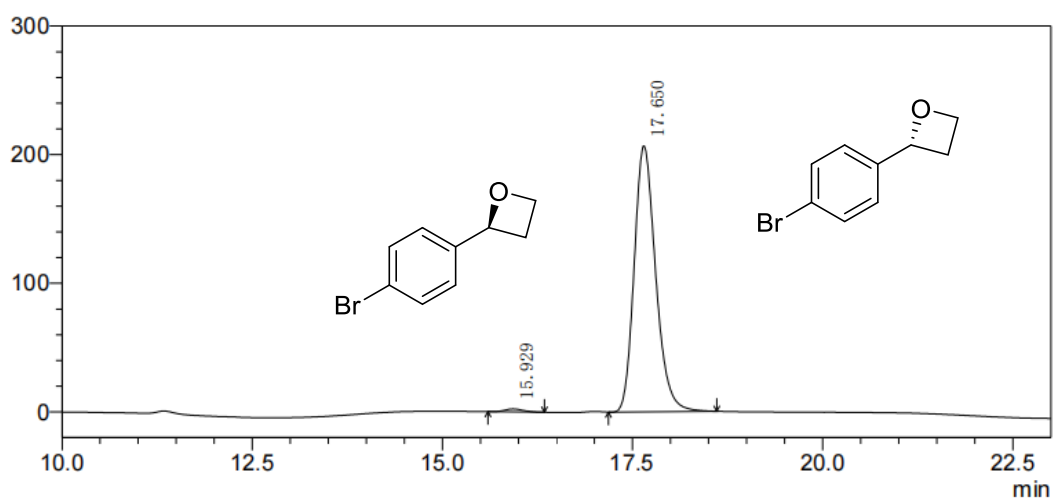

PDA 210nm

| ID# | Rt. Time | Area    | Height | Area % |
|-----|----------|---------|--------|--------|
| 1   | 15.929   | 40308   | 2366   | 0.981  |
| 2   | 17.650   | 4066469 | 206855 | 99.019 |

**Chiral HPLC analysis:** Diacel Chiralpak OX-3, *n*-hexane/*i*-PrOH = 99/1, flow rate 0.5 mL/min,  $\lambda$  = 210 nm,  $t_{(S)}$  = 15.9 min,  $t_{(R)}$  = 17.7 min.

Chemical synthesized (*rac*)-**14b**

mV

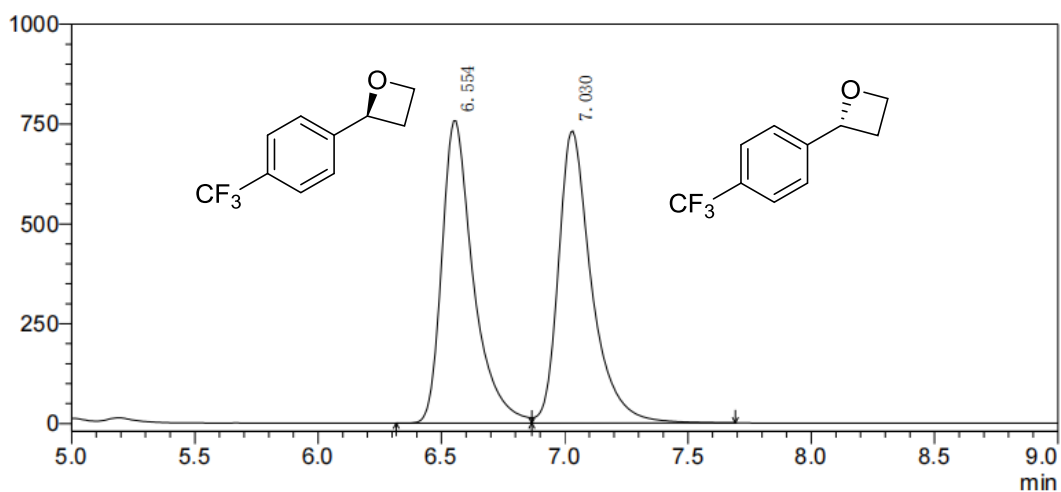

PDA 210nm

| ID# | Rt. Time | Area    | Height | Area % |
|-----|----------|---------|--------|--------|
| 1   | 6.554    | 6706285 | 757087 | 49.538 |
| 2   | 7.030    | 6831275 | 731356 | 50.462 |

Enzymatic synthesized (*R*)-**14b**

mV

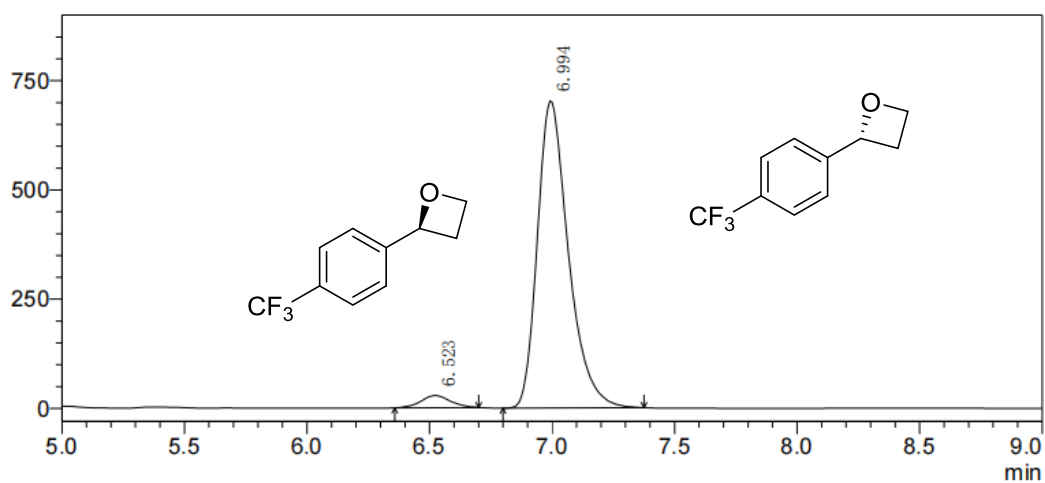

PDA 210nm

| ID# | Rt. Time | Area    | Height | Area % |
|-----|----------|---------|--------|--------|
| 1   | 6.523    | 234064  | 27946  | 3.641  |
| 2   | 6.994    | 6194052 | 702525 | 96.359 |

**Chiral HPLC analysis:** Diacel Chiralpak OX-3, *n*-hexane/*i*-PrOH = 97/3, flow rate 0.7 mL/min,  $\lambda$  = 210 nm.  $t_{(S)}$  = 6.5 min,  $t_{(R)}$  = 7.0 min.

Chemical synthesized (*rac*)-**15b**

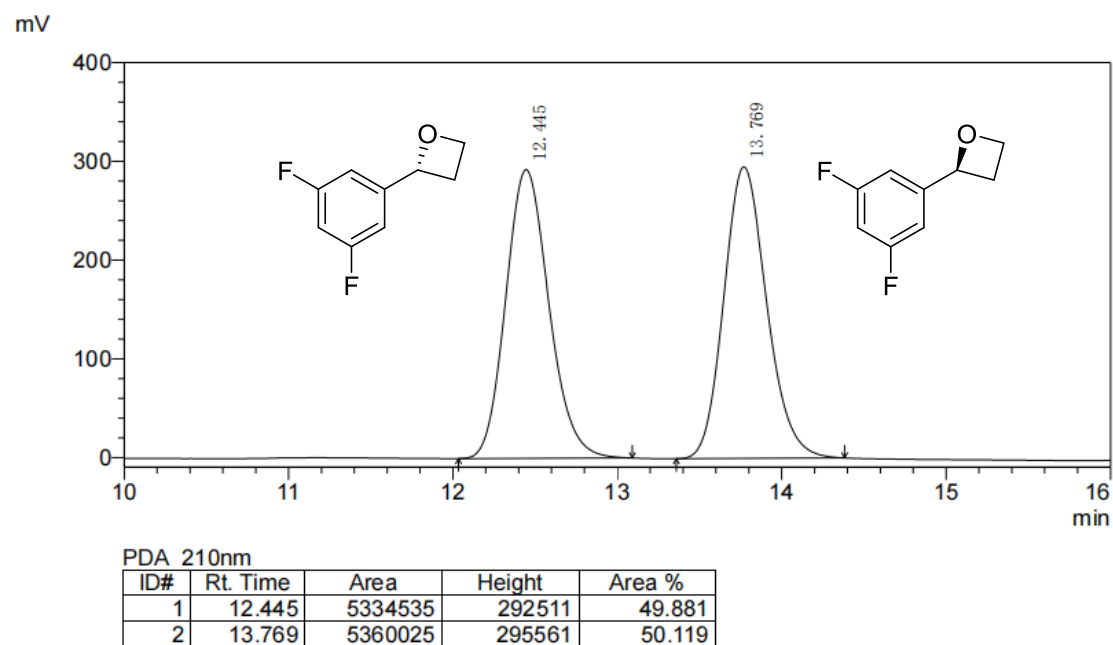

Enzymatic synthesized (*R*)-**15b**

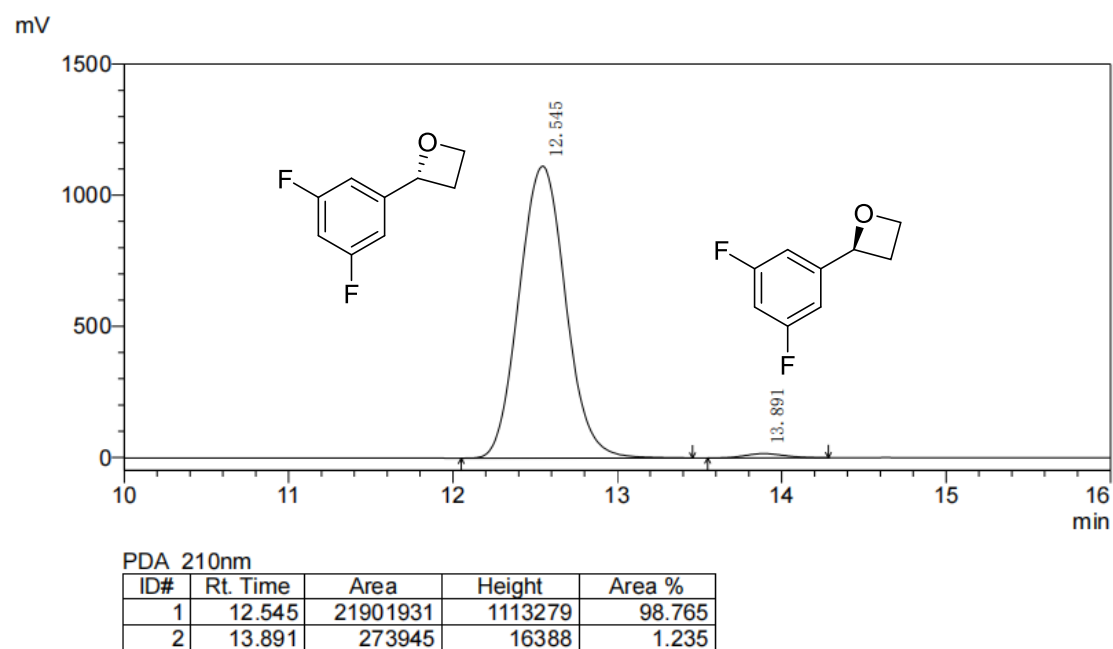

**Chiral HPLC analysis:** Diacel Chiralpak IA-3, *n*-hexane/*i*-PrOH = 99/1, flow rate 0.5 mL/min,  $\lambda$  = 210 nm.  $t_{(R)}$  = 12.5 min,  $t_{(S)}$  = 13.9 min.

Chemical synthesized (*rac*)-**16b**

mV

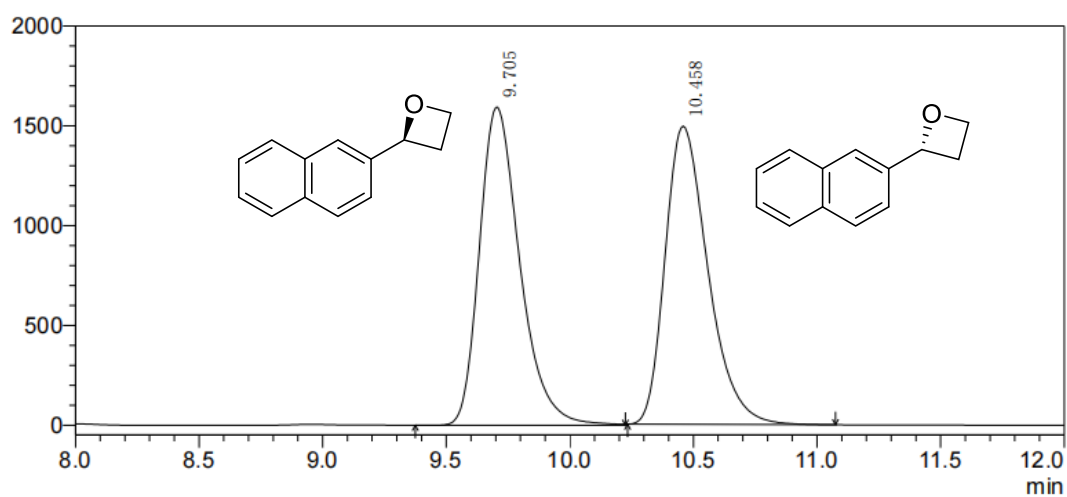

PDA 210nm

| ID# | Rt. Time | Area     | Height  | Area % |
|-----|----------|----------|---------|--------|
| 1   | 9.705    | 18172670 | 1595119 | 50.191 |
| 2   | 10.458   | 18034694 | 1494464 | 49.809 |

Enzymatic synthesized (*R*)-**16b**

mV

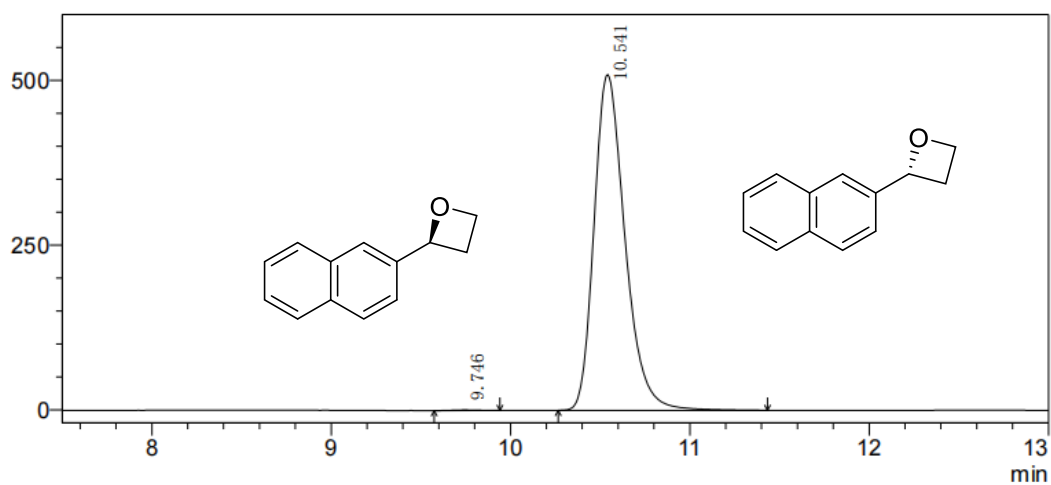

PDA 210nm

| ID# | Rt. Time | Area    | Height | Area % |
|-----|----------|---------|--------|--------|
| 1   | 9.746    | 8436    | 840    | 0.138  |
| 2   | 10.541   | 6110915 | 509757 | 99.862 |

**Chiral HPLC analysis:** Diacel Chiralpak OX-3, *n*-hexane/*i*-PrOH = 97/3, flow rate 0.7 mL/min,  $\lambda$  = 210 nm.  $t_{(S)}$  = 9.7 min,  $t_{(R)}$  = 10.5 min.

Chemical synthesized (*rac*)-**17b**

mV

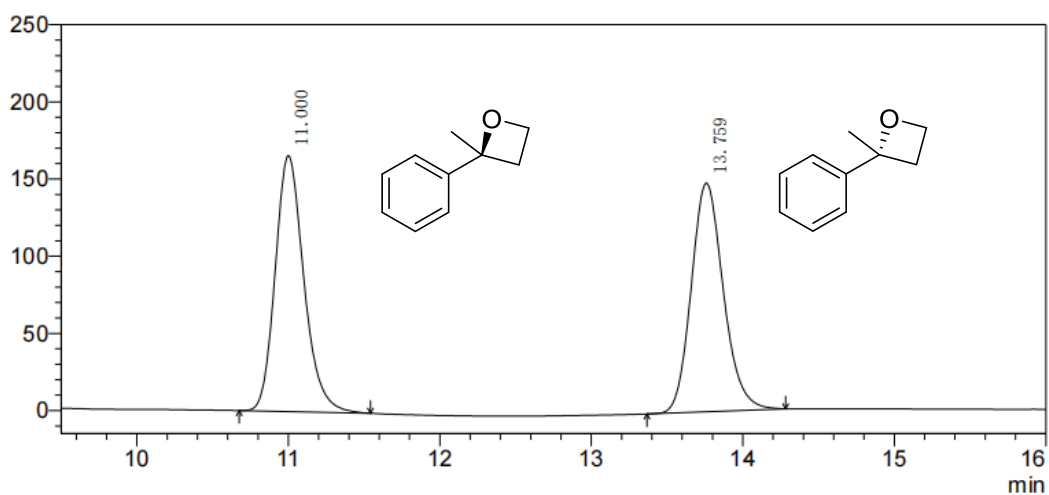

PDA 210nm

| ID# | Rt. Time | Area    | Height | Area % |
|-----|----------|---------|--------|--------|
| 1   | 11.000   | 2181178 | 165876 | 49.984 |
| 2   | 13.759   | 2182556 | 148316 | 50.016 |

Enzymatic synthesized (*R*)-**17b**

mV

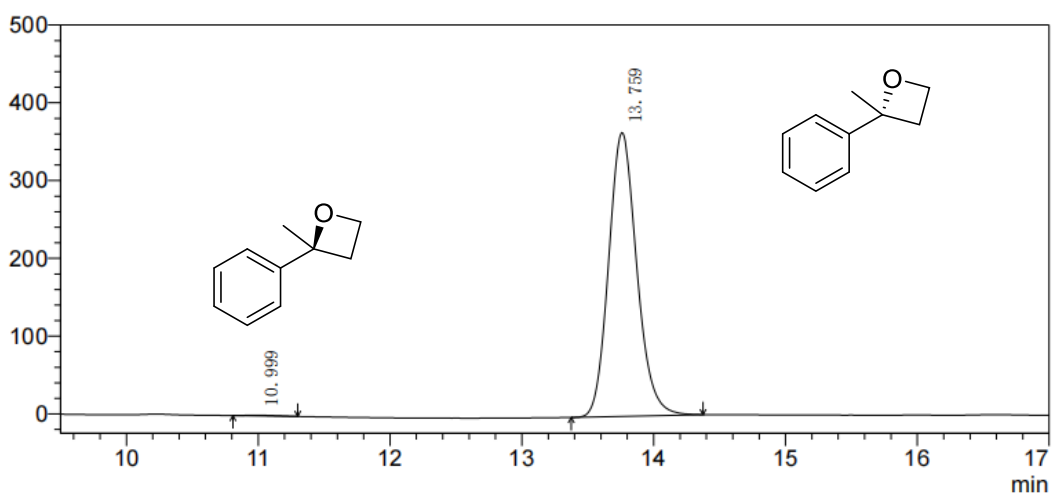

PDA 210nm

| ID# | Rt. Time | Area    | Height | Area % |
|-----|----------|---------|--------|--------|
| 1   | 10.999   | 12545   | 857    | 0.230  |
| 2   | 13.759   | 5433345 | 364819 | 99.770 |

**Chiral HPLC analysis:** Diacel Chiralpak OX-3, *n*-hexane/*i*-PrOH = 99/1, flow rate 0.5 mL/min,  $\lambda = 210$  nm.  $t_{(S)} = 11.0$  min,  $t_{(R)} = 13.8$  min.

Chemical synthesized (*rac*)-**18b**

mV

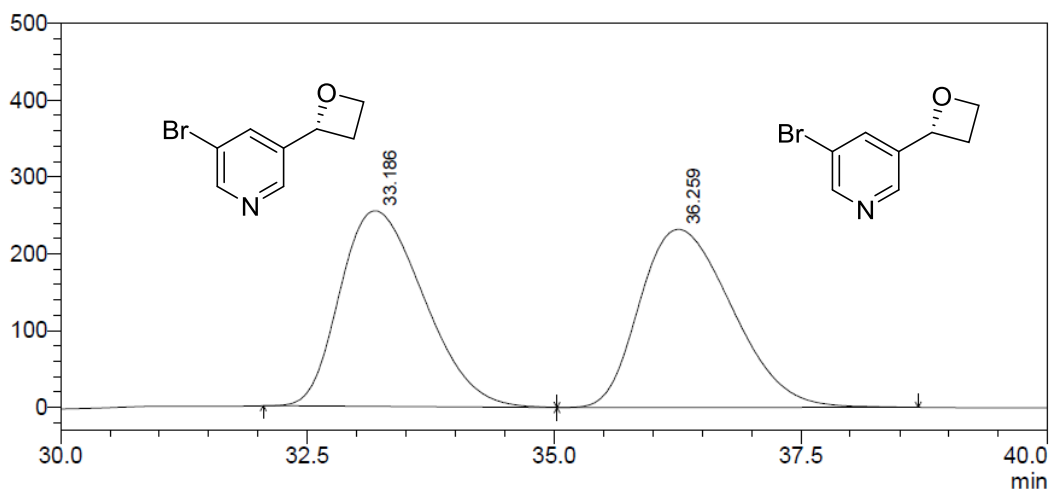

PDA 210nm

| ID# | Rt. Time | Area     | Height | Area%  |
|-----|----------|----------|--------|--------|
| 1   | 33.186   | 15091005 | 254835 | 49.929 |
| 2   | 36.259   | 15133746 | 232002 | 50.071 |

Enzymatic synthesized (*R*)-**18b**

mV

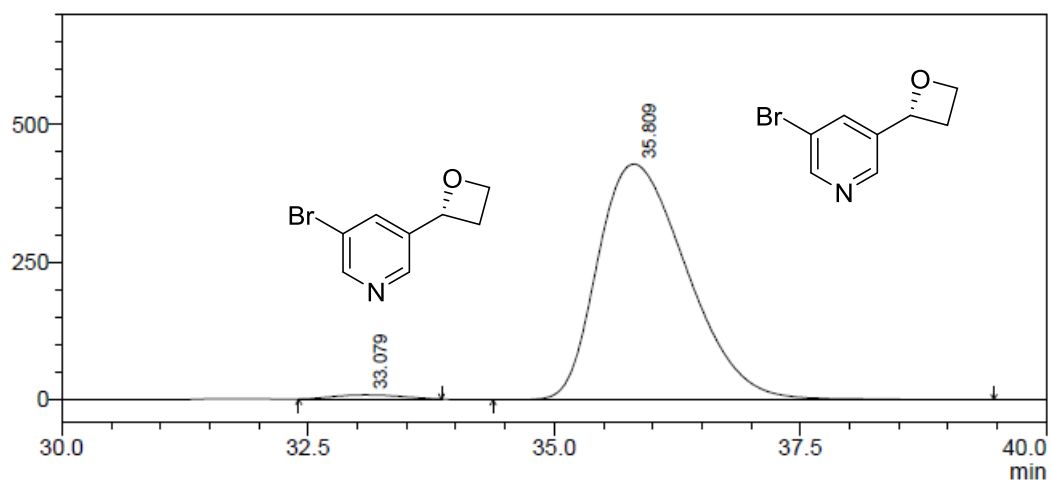

PDA 210nm

| ID# | Rt. Time | Area     | Height | Area%  |
|-----|----------|----------|--------|--------|
| 1   | 33.079   | 364895   | 7586   | 1.331  |
| 2   | 35.809   | 27048154 | 428316 | 98.669 |

**Chiral HPLC analysis:** Diacel Chiralpak OB-H, *n*-hexane/*i*-PrOH = 99/1, flow rate 0.5 mL/min,  $\lambda = 210$  nm.  $t_{(S)} = 33.1$  min,  $t_{(R)} = 35.8$  min.

Chemical synthesized (*rac*)-**19b**

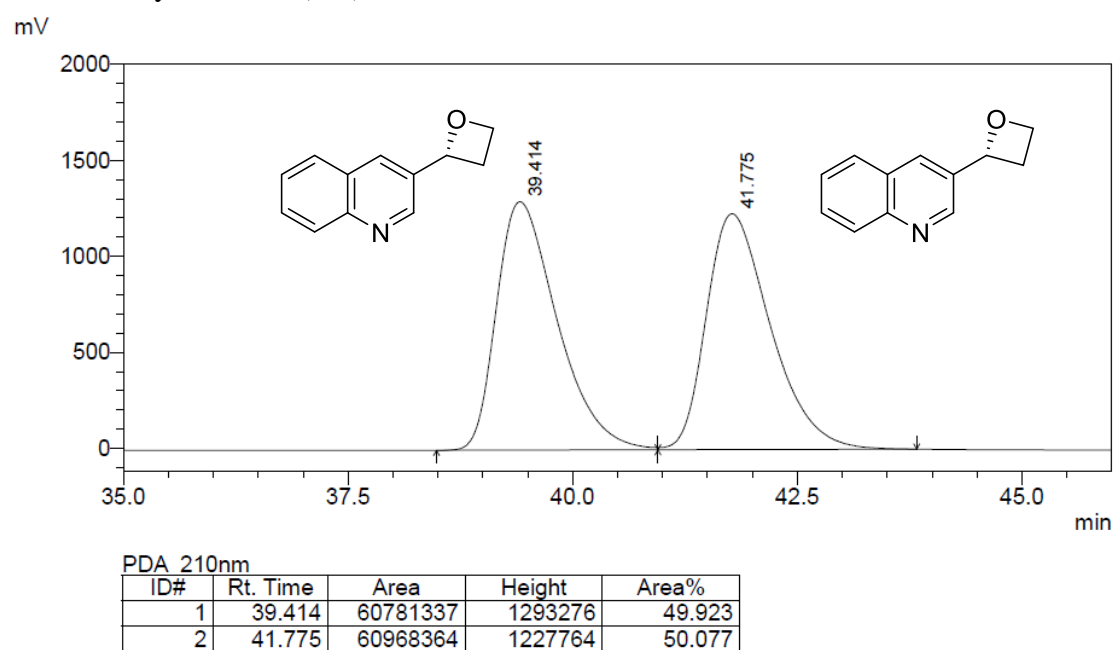

Enzymatic synthesized (*R*)-**19b**

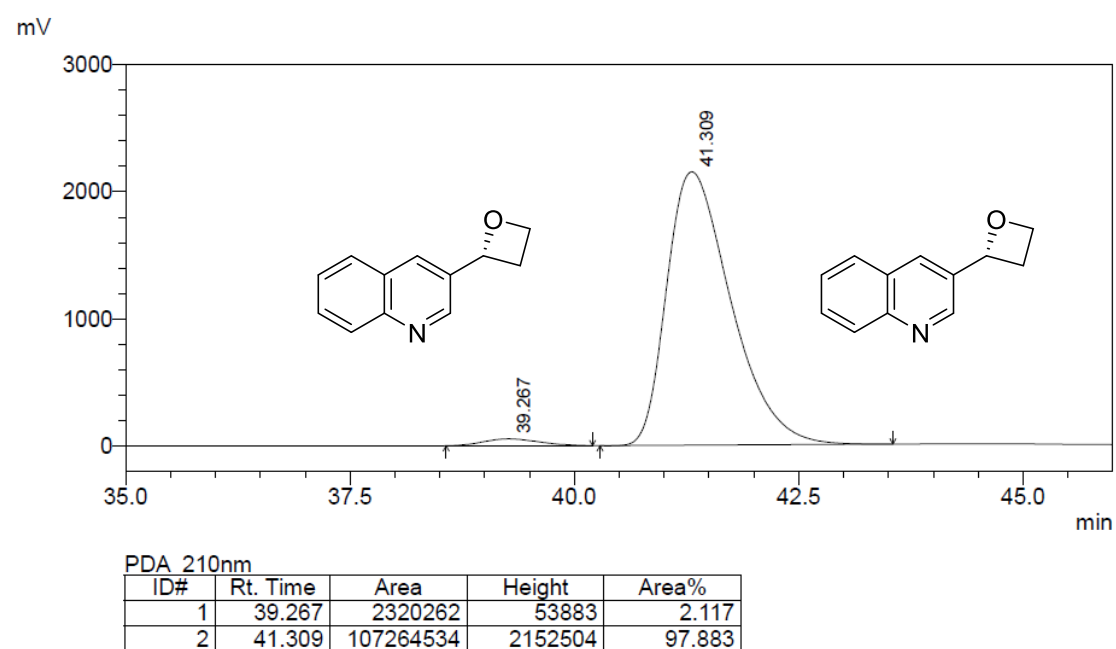

**Chiral HPLC analysis:** Diacel Chiralpak AD-H, *n*-hexane/*i*-PrOH = 95/5, flow rate 0.5 mL/min,  $\lambda$  = 210 nm.  $t_{(S)}$  = 39.3 min,  $t_{(R)}$  = 41.3 min.

Chemical synthesized (*rac*)-**21b**

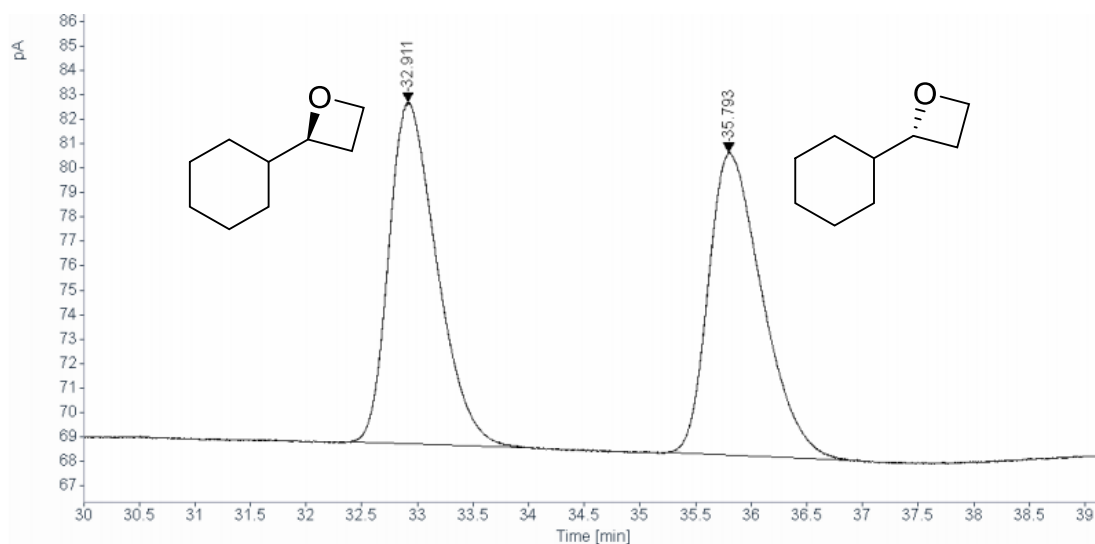

| ID# | Ret. Time | Area    | Height | Area%  | Resolution |
|-----|-----------|---------|--------|--------|------------|
| 1   | 32.911    | 420.903 | 14.020 | 50.148 |            |
| 1   | 35.793    | 418.413 | 12.422 | 49.852 | 3.468      |

Enzymatic synthesized (*R*)-**22b**

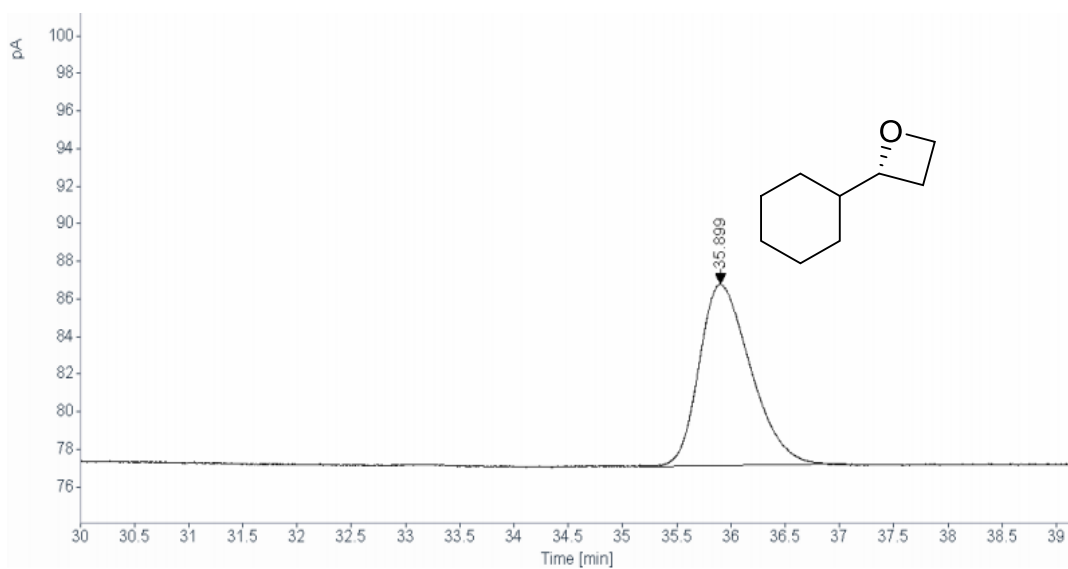

| ID# | Ret. Time | Area    | Height | Area%   | Resolution |
|-----|-----------|---------|--------|---------|------------|
| 2   | 35.899    | 319.265 | 9.684  | 100.000 |            |

**Chiral GC analysis:** Rt-bDEXcst (RESTEK), 80 °C for 45 min,  $t_{(S)}$  = 32.9 min,  $t_{(R)}$  = 35.9 min.



Chemical synthesized (*rac*)-**1b** from **22a**

mV

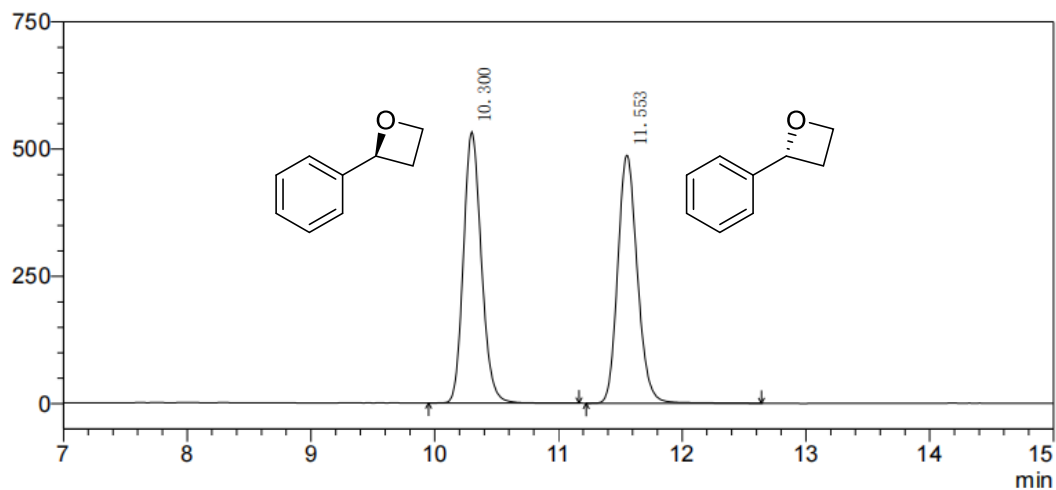

PDA 210nm

| ID# | Rt. Time | Area    | Height | Area % |
|-----|----------|---------|--------|--------|
| 1   | 10.300   | 5360586 | 532422 | 49.946 |
| 2   | 11.553   | 5372125 | 487092 | 50.054 |

Enzymatic synthesized (*R*)-**1b** from **22a**

mV

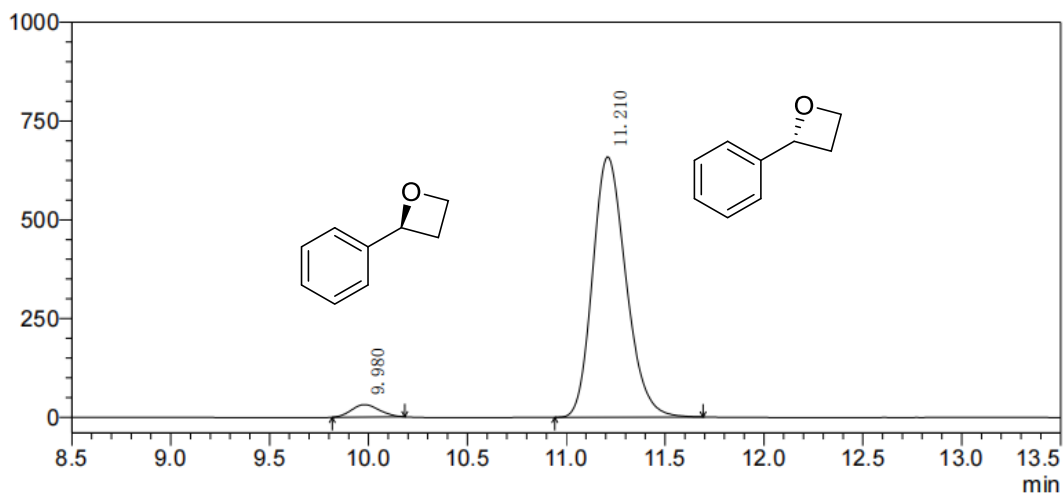

PDA 210nm

| ID# | Rt. Time | Area    | Height | Area % |
|-----|----------|---------|--------|--------|
| 1   | 9.980    | 309572  | 31377  | 3.854  |
| 2   | 11.210   | 7722247 | 659815 | 96.146 |

**Chiral HPLC analysis:** Diacel Chiralpak OX-3, *n*-hexane/*i*-PrOH = 97/3, flow rate 0.7 mL/min,  $\lambda = 210$  nm.  $t_{(S)} = 10.0$  min,  $t_{(R)} = 11.2$  min.

Chemical synthesized (*rac*)-**1b** from **23a**

mV

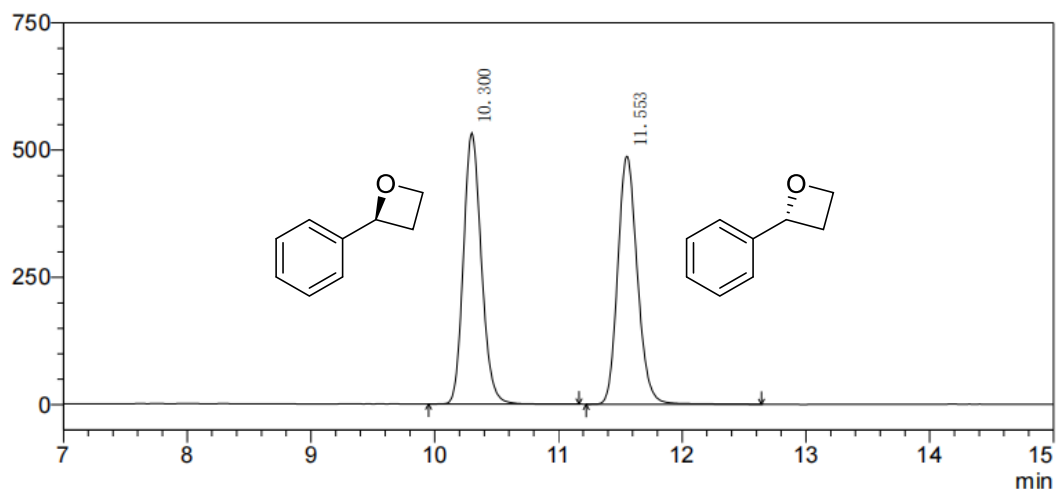

PDA 210nm

| ID# | Rt. Time | Area    | Height | Area % |
|-----|----------|---------|--------|--------|
| 1   | 10.300   | 5360586 | 532422 | 49.946 |
| 2   | 11.553   | 5372125 | 487092 | 50.054 |

Enzymatic synthesized (*R*)-**1b** from **23a**

mV

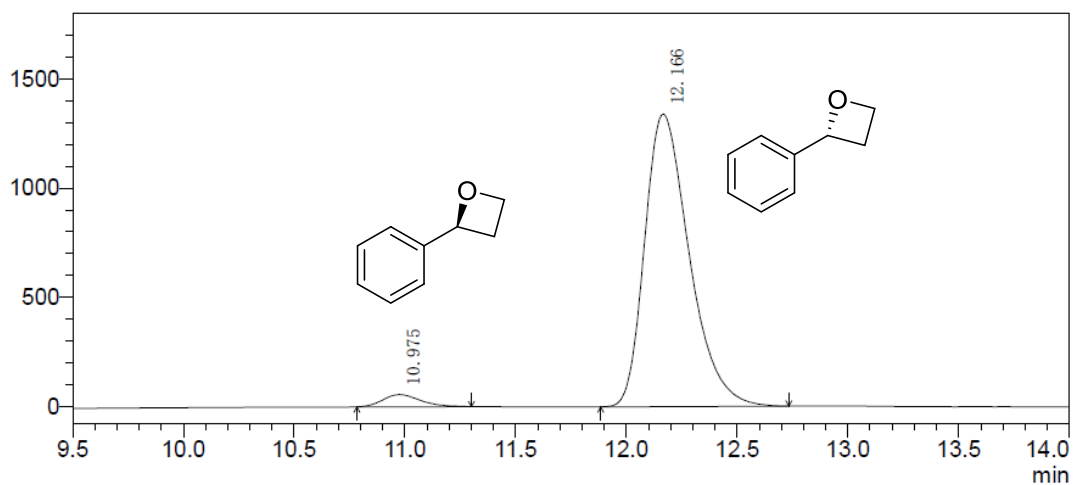

PDA 210nm

| ID# | Rt. Time | Area     | Height  | Area % |
|-----|----------|----------|---------|--------|
| 1   | 10.975   | 662397   | 56075   | 3.410  |
| 2   | 12.166   | 18765120 | 1342199 | 96.590 |

**Chiral HPLC analysis:** Diacel Chiralpak OX-3, *n*-hexane/*i*-PrOH = 97/3, flow rate 0.7 mL/min,  $\lambda$  = 210 nm.  $t_{(S)}$  = 11.0 min,  $t_{(R)}$  = 12.2 min.

Chemical synthesized (*rac*)-**1a**

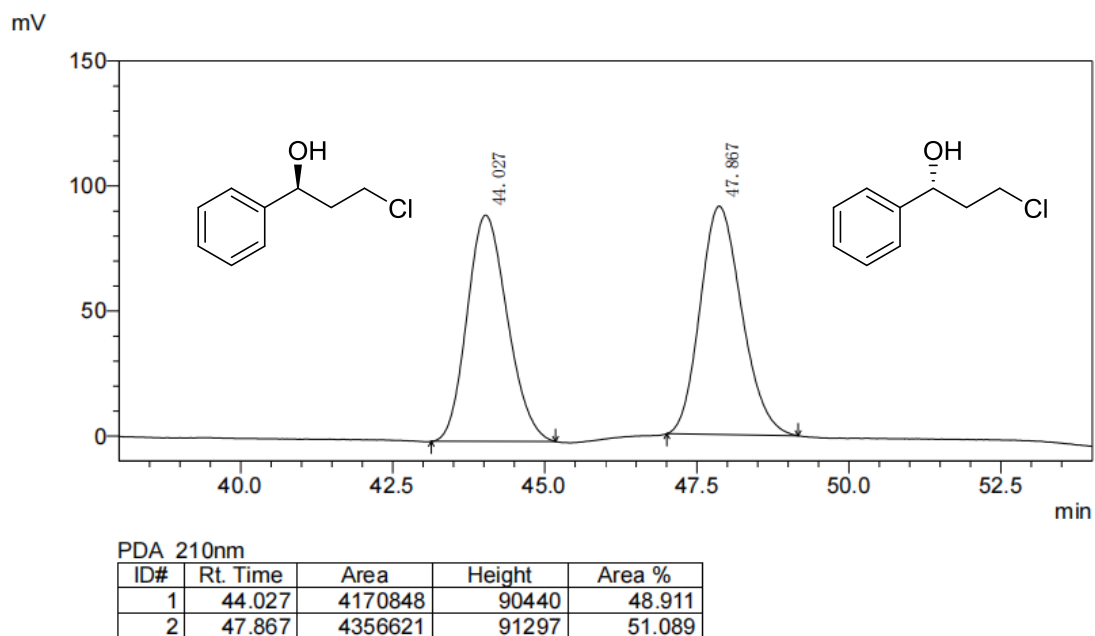

Enzymatic synthesized (*S*)-**1a**

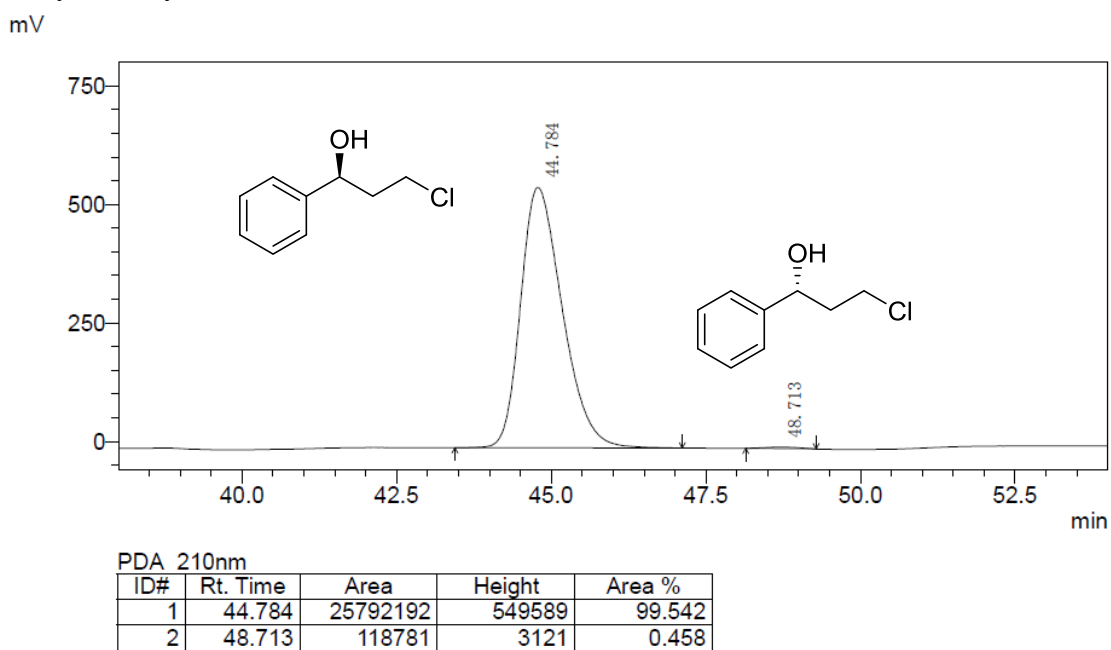

**Chiral HPLC analysis:** Diacel Chiralpak OX-3, *n*-hexane/*i*-PrOH = 99/1, flow rate 0.5 mL/min,  $\lambda$  = 210 nm,  $t_{(S)}$  = 44.8 min,  $t_{(R)}$  = 48.7 min.

### Chemical synthesized (*rac*)-**2a**

mV

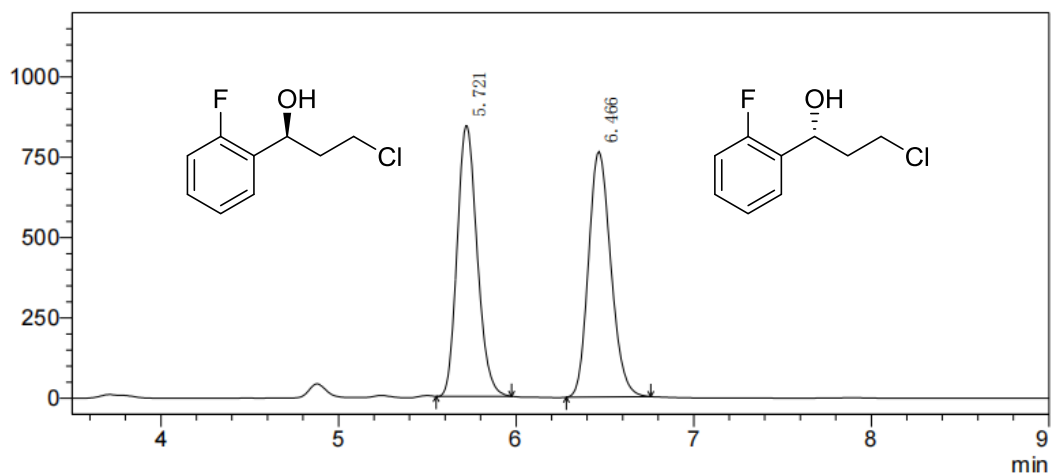

PDA 210nm

| ID# | Rt. Time | Area    | Height | Area % |
|-----|----------|---------|--------|--------|
| 1   | 5.721    | 6592144 | 842409 | 49.654 |
| 2   | 6.466    | 6684094 | 763639 | 50.346 |

### Enzymatic synthesized (*S*)-**2a**

mV

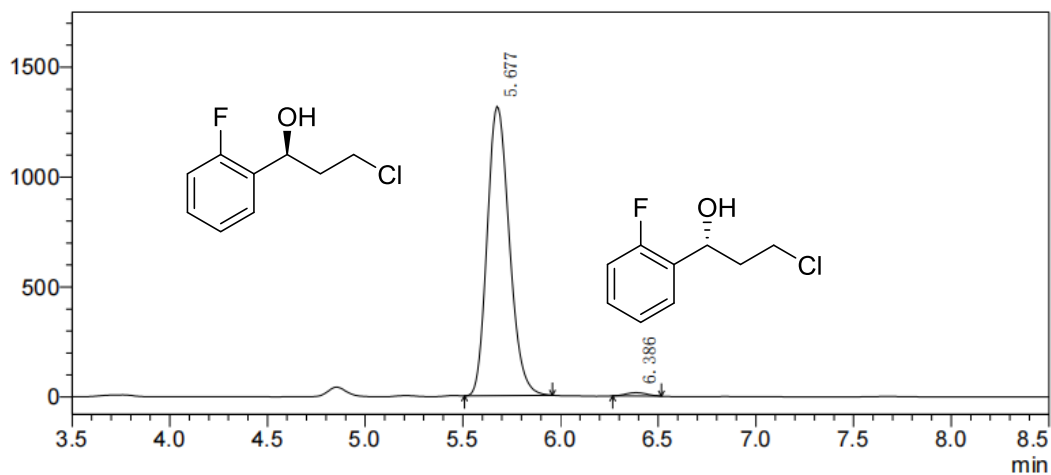

PDA 210nm

| ID# | Rt. Time | Area     | Height  | Area % |
|-----|----------|----------|---------|--------|
| 1   | 5.677    | 10452211 | 1315327 | 98.915 |
| 2   | 6.386    | 114640   | 15245   | 1.085  |

**Chiral HPLC analysis:** Diacel Chiralpak OD-H, *n*-hexane/*i*-PrOH = 90/10, flow rate 1.0 mL/min,  $\lambda$  = 210 nm,  $t_{(S)}$  = 5.7 min,  $t_{(R)}$  = 6.4 min.

Chemical synthesized (*rac*)-**3a**

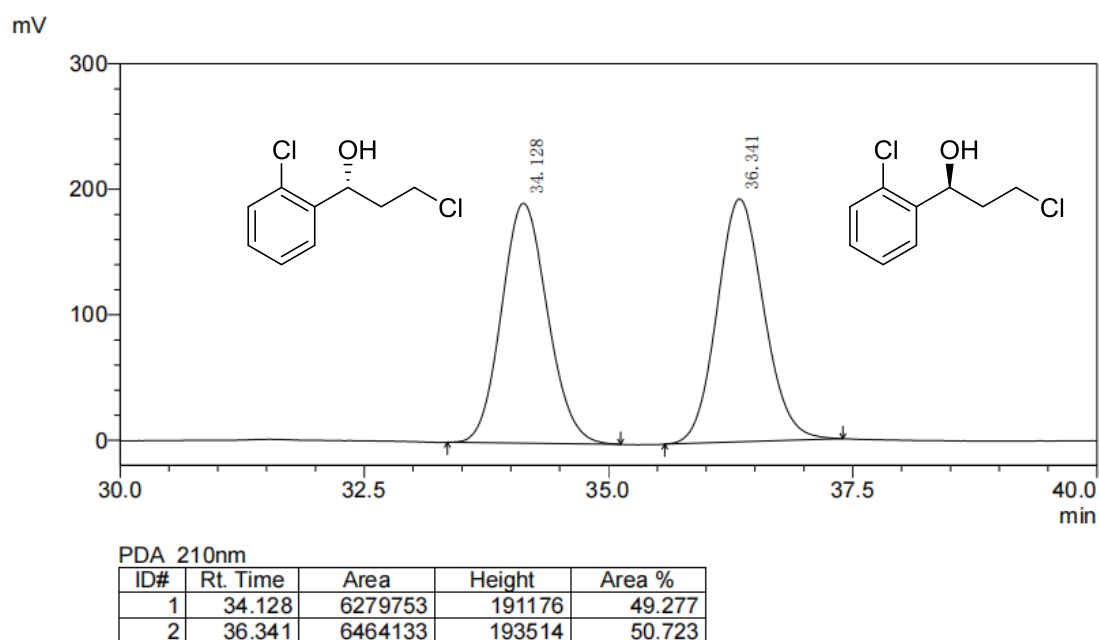

Enzymatic synthesized (*S*)-**3a**

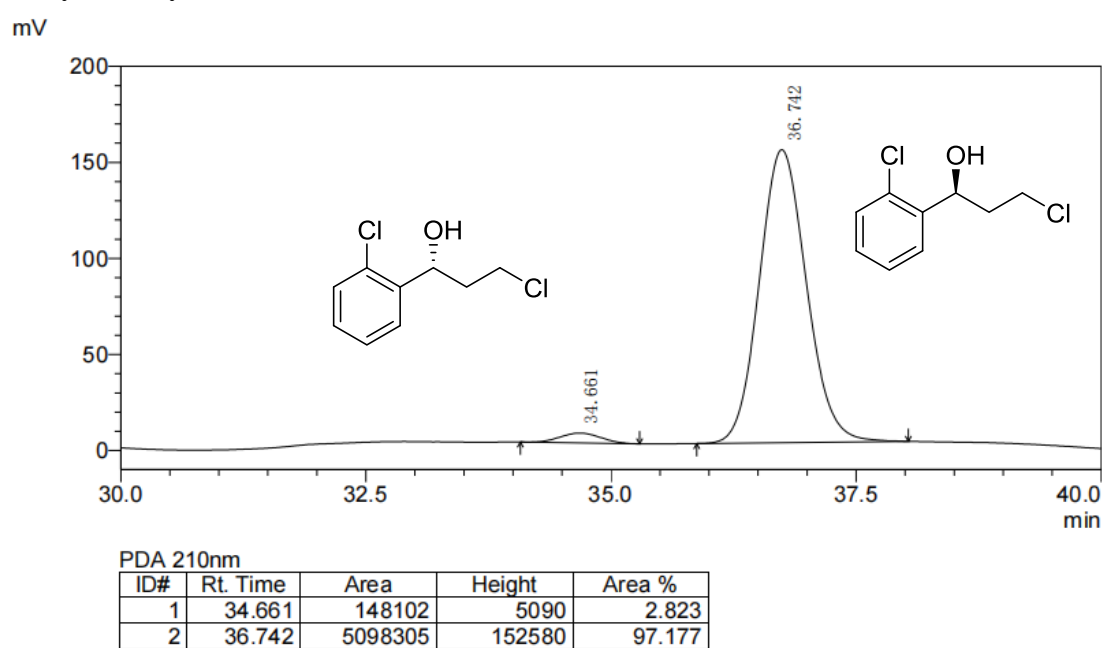

**Chiral HPLC analysis:** Diacel Chiralpak OX-3, *n*-hexane/*i*-PrOH = 99/1, flow rate 0.5 mL/min,  $\lambda$  = 210 nm,  $t_{(R)}$  = 34.7 min,  $t_{(S)}$  = 36.7 min.

Chemical synthesized (*rac*)-**4a**

mV

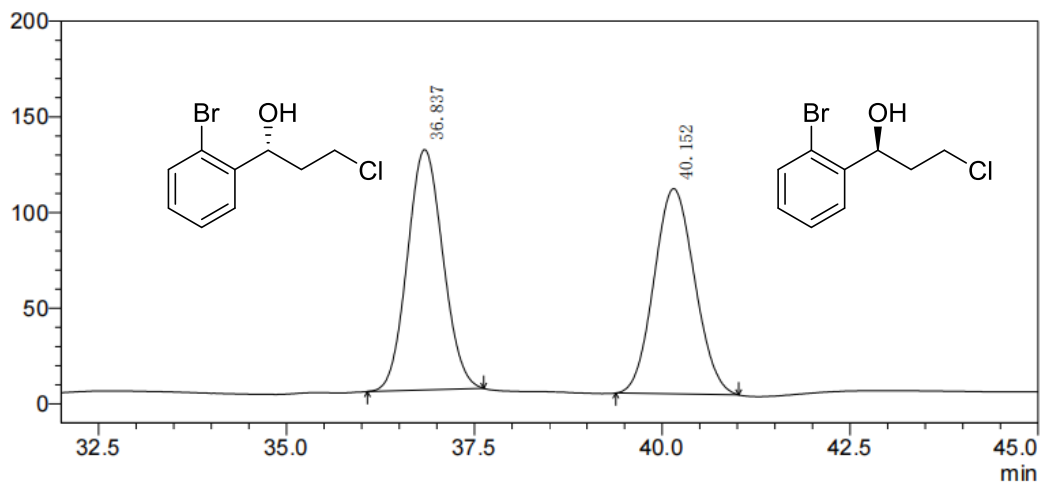

PDA 210nm

| ID# | Rt. Time | Area    | Height | Area % |
|-----|----------|---------|--------|--------|
| 1   | 36.837   | 4144476 | 125617 | 50.650 |
| 2   | 40.152   | 4038095 | 107240 | 49.350 |

Enzymatic synthesized (*S*)-**4a**

mV

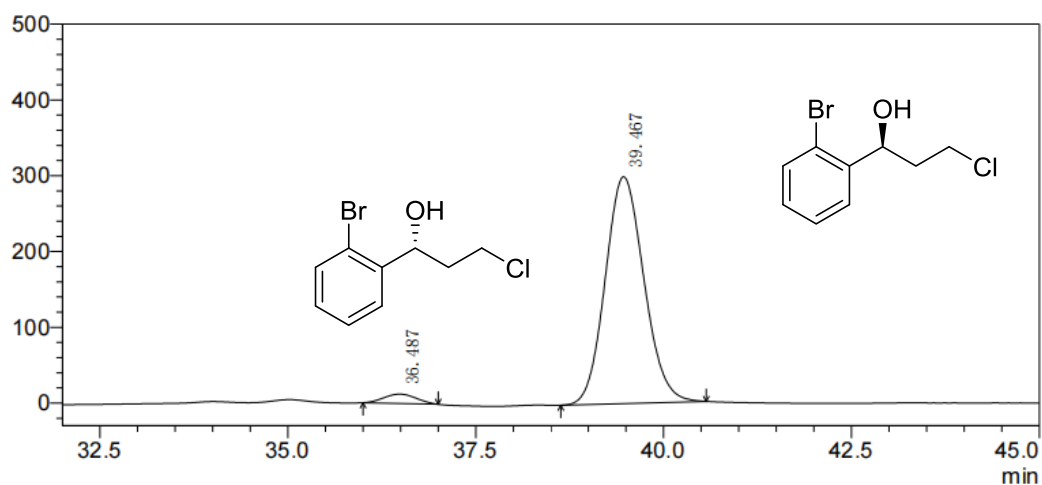

PDA 210nm

| ID# | Rt. Time | Area     | Height | Area % |
|-----|----------|----------|--------|--------|
| 1   | 36.487   | 370934   | 12385  | 3.341  |
| 2   | 39.467   | 10731262 | 299359 | 96.659 |

**Chiral HPLC analysis:** Diacel Chiralpak OX-3, *n*-hexane/*i*-PrOH = 99/1, flow rate 0.5 mL/min,  $\lambda$  = 210 nm,  $t_{(R)}$  = 36.5 min,  $t_{(S)}$  = 39.5 min.

### Chemical synthesized (*rac*)-**5a**

mV

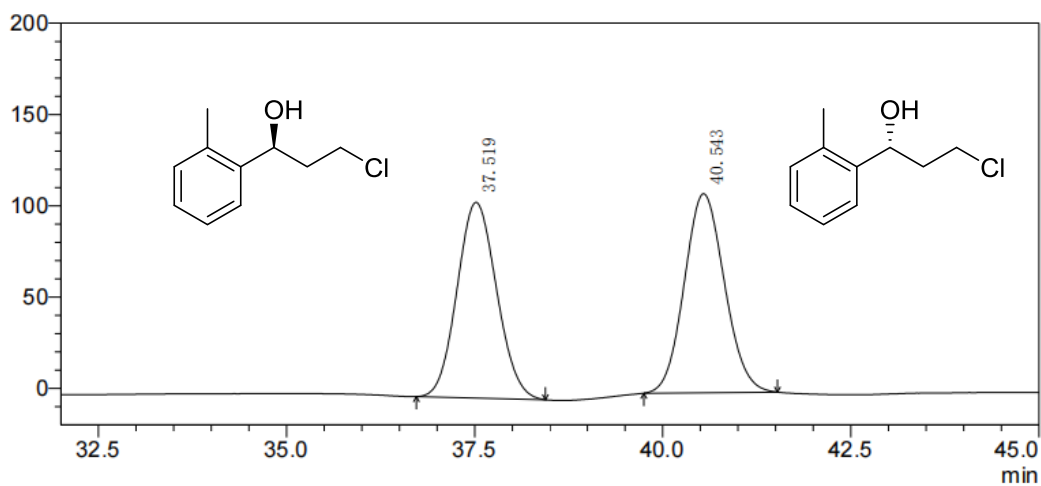

PDA 210nm

| ID# | Rt. Time | Area    | Height | Area % |
|-----|----------|---------|--------|--------|
| 1   | 37.519   | 3919814 | 107123 | 49.188 |
| 2   | 40.543   | 4049266 | 108941 | 50.812 |

### Enzymatic synthesized (*S*)-**5a**

mV

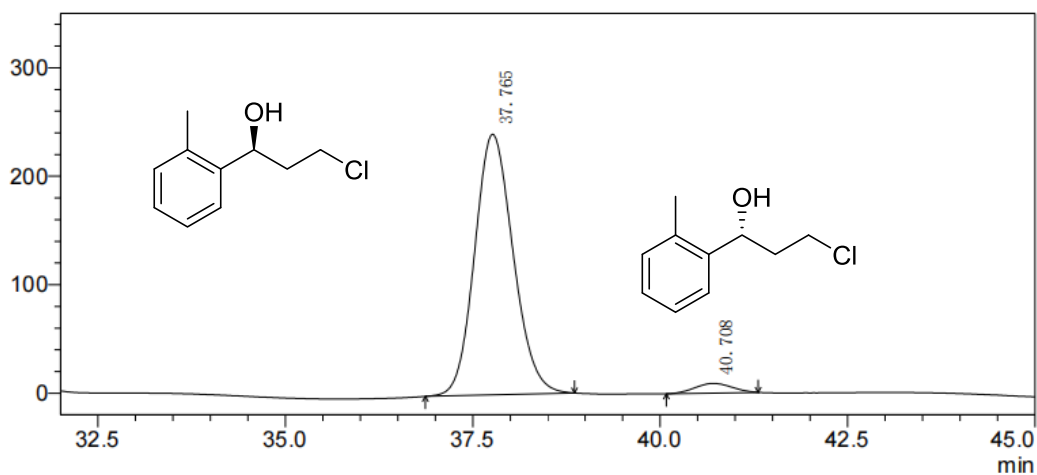

PDA 210nm

| ID# | Rt. Time | Area    | Height | Area % |
|-----|----------|---------|--------|--------|
| 1   | 37.765   | 8604714 | 240169 | 96.560 |
| 2   | 40.708   | 306501  | 8886   | 3.440  |

**Chiral HPLC analysis:** Diacel Chiralpak OX-3, *n*-hexane/*i*-PrOH = 99/1, flow rate 0.5 mL/min,  $\lambda$  = 210 nm,  $t_{(S)}$  = 37.8 min,  $t_{(R)}$  = 40.7 min.

Chemical synthesized (*rac*)-**6a**

mV

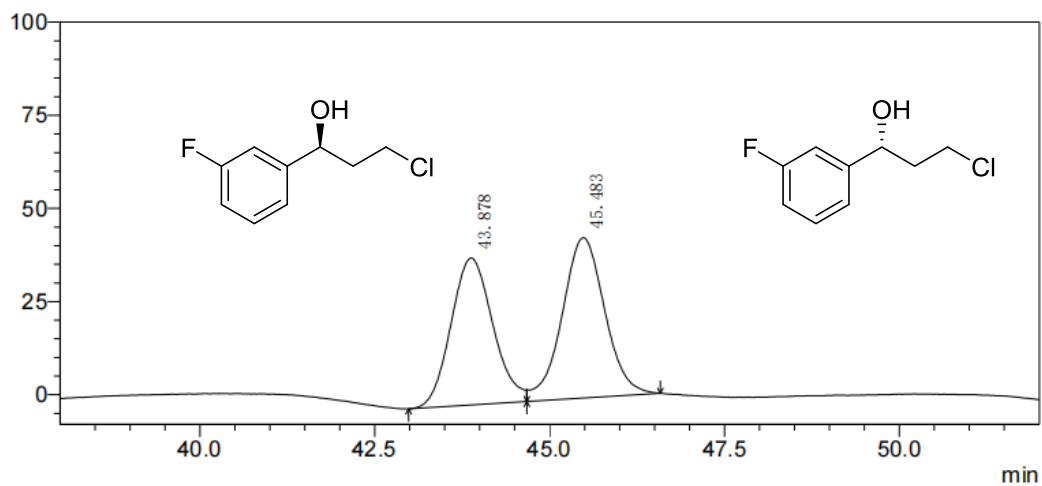

PDA 210nm

| ID# | Rt. Time | Area    | Height | Area % |
|-----|----------|---------|--------|--------|
| 1   | 43.878   | 1640174 | 39450  | 47.347 |
| 2   | 45.483   | 1823950 | 43025  | 52.653 |

Enzymatic synthesized (*S*)-**6a**

mV

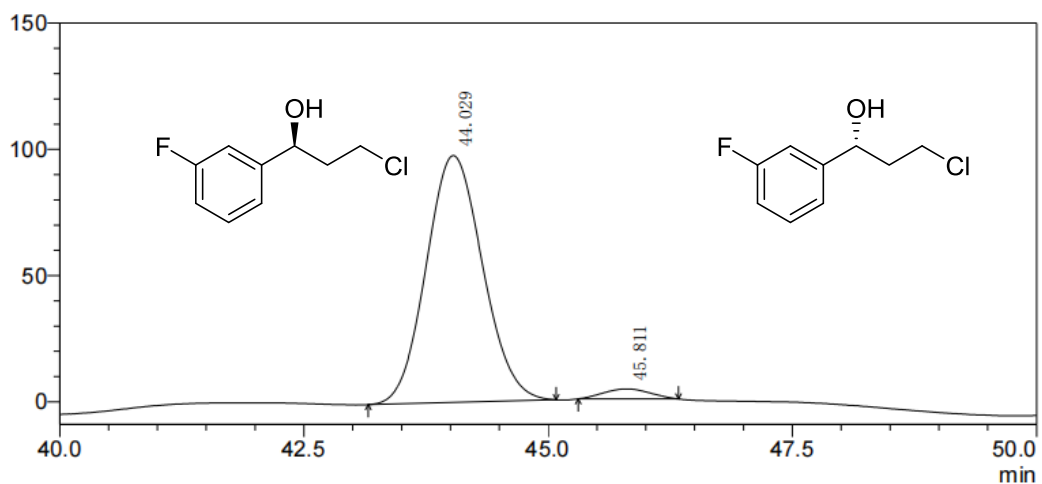

PDA 210nm

| ID# | Rt. Time | Area    | Height | Area % |
|-----|----------|---------|--------|--------|
| 1   | 44.029   | 3930510 | 97801  | 96.804 |
| 2   | 45.811   | 129779  | 3915   | 3.196  |

**Chiral HPLC analysis:** Diacel Chiralpak OX-3, *n*-hexane/*i*-PrOH = 99/1, flow rate 0.5 mL/min,  $\lambda$  = 210 nm,  $t_{(S)}$  = 44.0 min,  $t_{(R)}$  = 45.8 min.



### Chemical synthesized (*rac*)-**7a**

mV

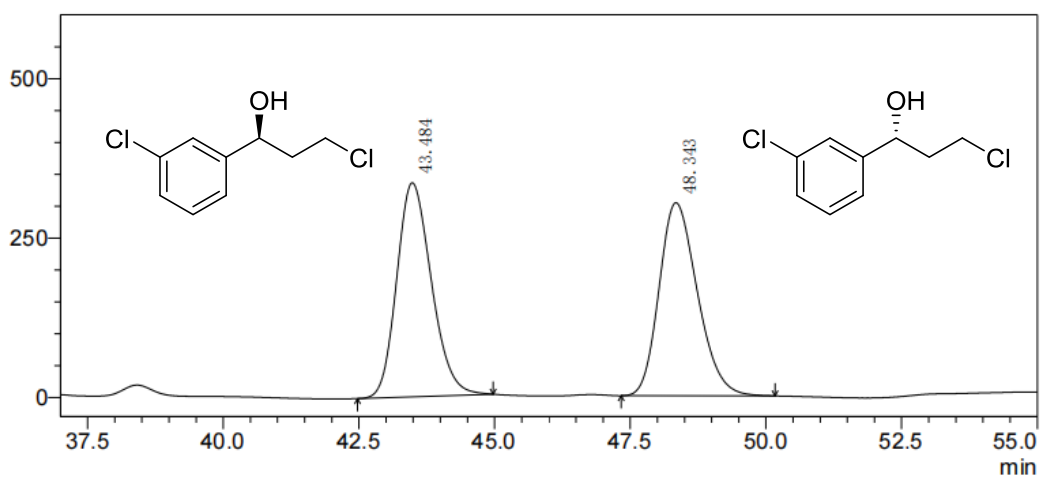

| PDA 210nm |          |          |        |        |
|-----------|----------|----------|--------|--------|
| ID#       | Rt. Time | Area     | Height | Area % |
| 1         | 43.484   | 14910958 | 335534 | 50.069 |
| 2         | 48.343   | 14869975 | 302683 | 49.931 |

### Enzymatic synthesized (*S*)-**7a**

mV

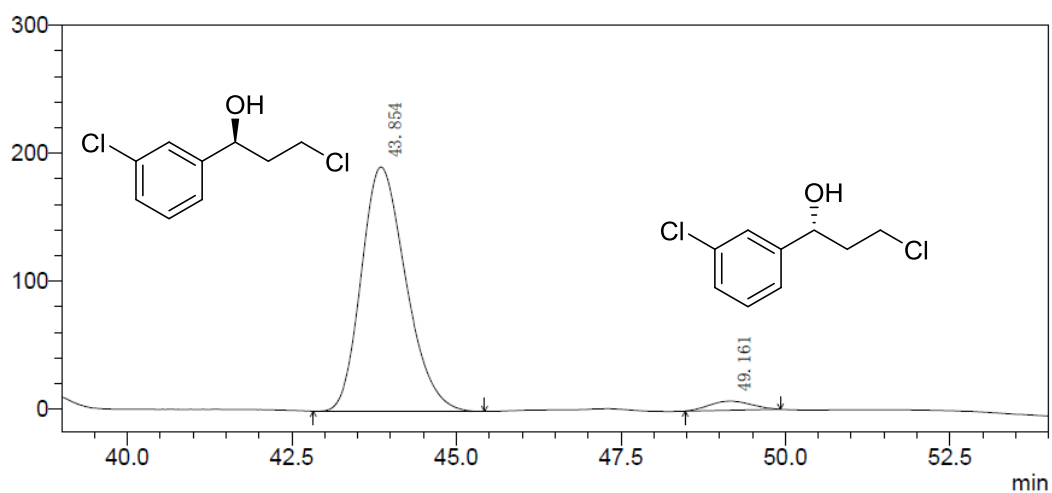

| PDA 210nm |          |         |        |        |
|-----------|----------|---------|--------|--------|
| ID#       | Rt. Time | Area    | Height | Area % |
| 1         | 43.854   | 9008485 | 191053 | 96.615 |
| 2         | 49.161   | 315597  | 7192   | 3.385  |

**Chiral HPLC analysis:** Diacel Chiralpak OX-3, *n*-hexane/*i*-PrOH = 99/1, flow rate 0.5 mL/min,  $\lambda$  = 210 nm,  $t_{(S)}$  = 43.8 min,  $t_{(R)}$  = 49.2 min.

Chemical synthesized (*rac*)-**8a**

mV

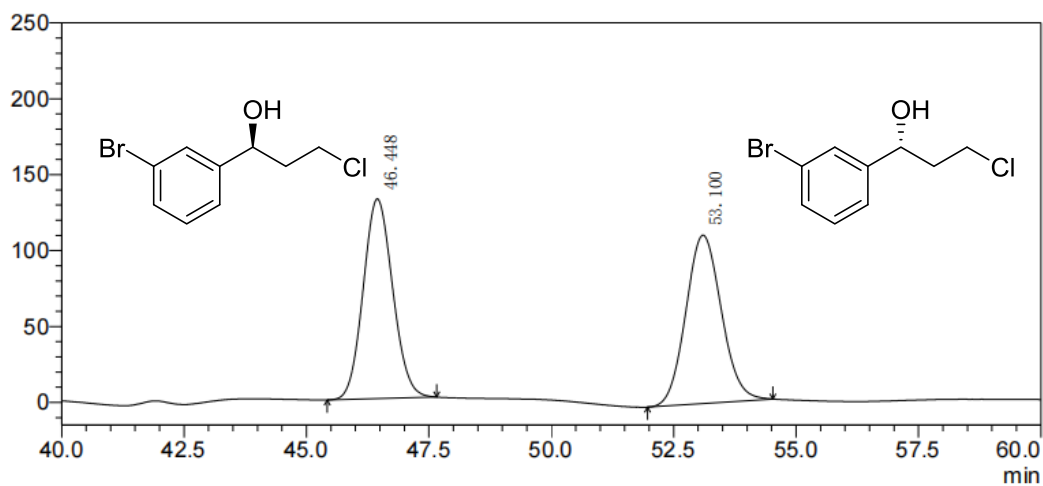

PDA 210nm

| ID# | Rt. Time | Area    | Height | Area % |
|-----|----------|---------|--------|--------|
| 1   | 46.448   | 5522598 | 131641 | 49.653 |
| 2   | 53.100   | 5599756 | 110957 | 50.347 |

Enzymatic synthesized (*S*)-**8a**

mV

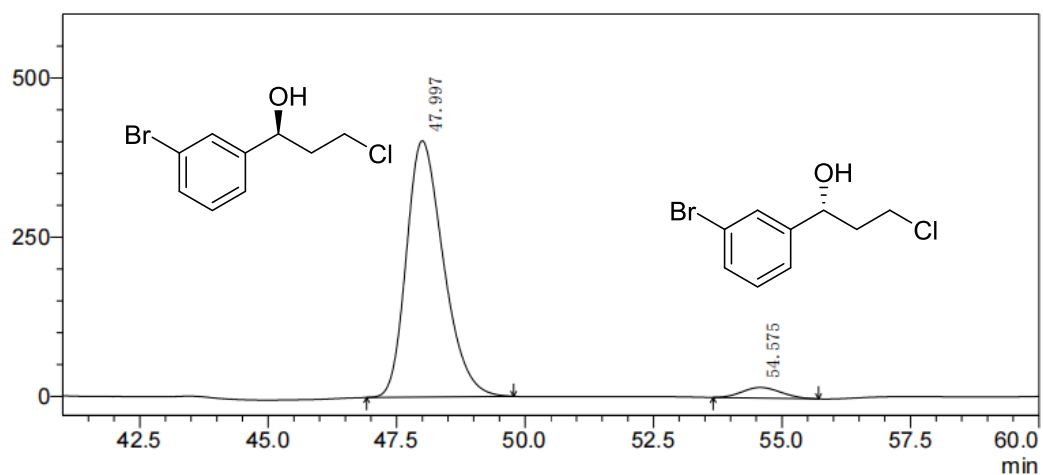

PDA 210nm

| ID# | Rt. Time | Area     | Height | Area % |
|-----|----------|----------|--------|--------|
| 1   | 47.997   | 20204529 | 402273 | 95.835 |
| 2   | 54.575   | 878137   | 16663  | 4.165  |

**Chiral HPLC analysis:** Diacel Chiralpak OX-3, *n*-hexane/*i*-PrOH = 99/1, flow rate 0.5 mL/min,  $\lambda$  = 210 nm,  $t_{(S)}$  = 48.0 min,  $t_{(R)}$  = 54.6 min.

Chemical synthesized (*rac*)-**9a**

mV

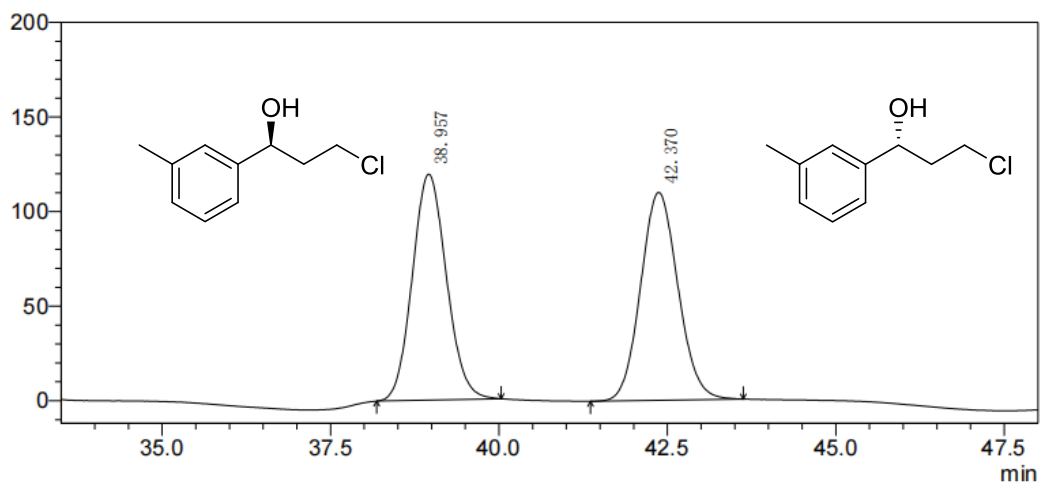

PDA 210nm

| ID# | Rt. Time | Area    | Height | Area % |
|-----|----------|---------|--------|--------|
| 1   | 38.957   | 4212505 | 119440 | 49.839 |
| 2   | 42.370   | 4239719 | 109891 | 50.161 |

Enzymatic synthesized (*S*)-**9a**

mV

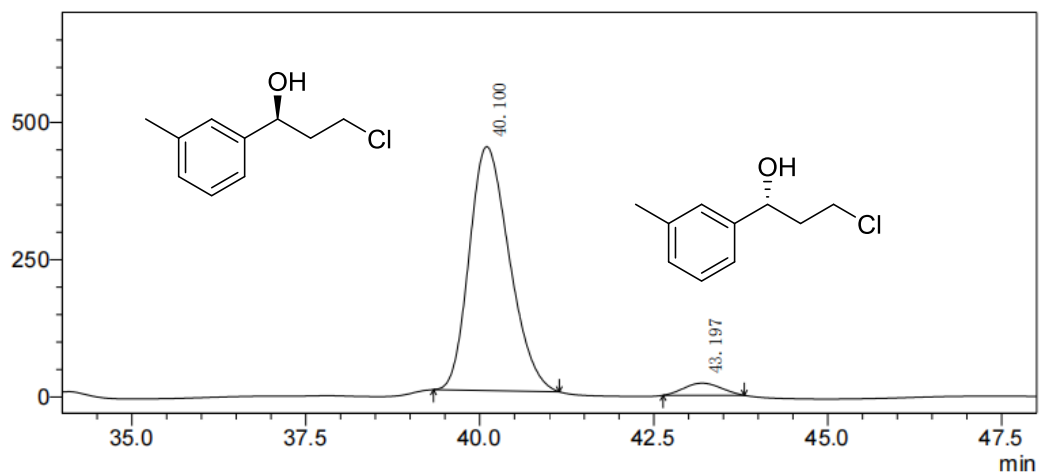

PDA 210nm

| ID# | Rt. Time | Area     | Height | Area % |
|-----|----------|----------|--------|--------|
| 1   | 40.100   | 17812647 | 444013 | 95.620 |
| 2   | 43.197   | 816026   | 22089  | 4.380  |

**Chiral HPLC analysis:** Diacel Chiralpak OX-3, *n*-hexane/*i*-PrOH = 99/1, flow rate 0.5 mL/min,  $\lambda$  = 210 nm,  $t_{(S)}$  = 40.1 min,  $t_{(R)}$  = 43.2 min.

### Chemical synthesized (*rac*)-**10a**

mV

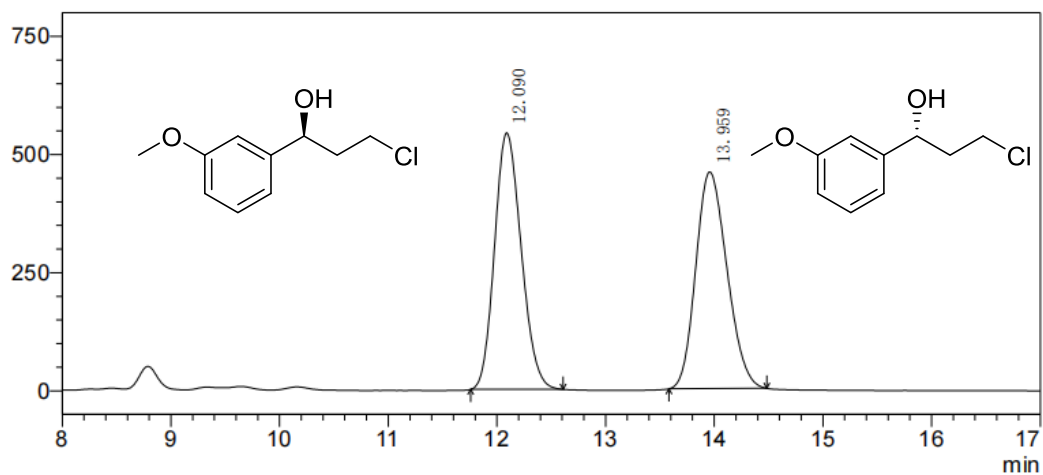

PDA 210nm

| ID# | Rt. Time | Area    | Height | Area % |
|-----|----------|---------|--------|--------|
| 1   | 12.090   | 9259966 | 542740 | 50.274 |
| 2   | 13.959   | 9158901 | 458506 | 49.726 |

### Enzymatic synthesized (*S*)-**10a**

mV

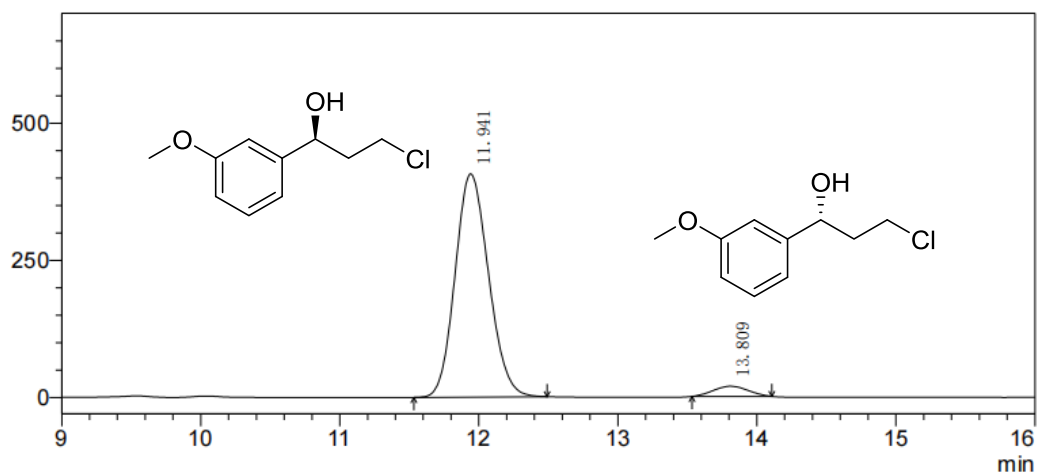

PDA 210nm

| ID# | Rt. Time | Area    | Height | Area % |
|-----|----------|---------|--------|--------|
| 1   | 11.941   | 6808404 | 406954 | 95.485 |
| 2   | 13.809   | 321906  | 18565  | 4.515  |

**Chiral HPLC analysis:** Diacel Chiralpak OD-H, *n*-hexane/*i*-PrOH = 90/10, flow rate 1.0 mL/min,  $\lambda = 210$  nm,  $t_{(S)}$  = 11.9 min,  $t_{(R)}$  = 13.8 min.

### Chemical synthesized (*rac*)-**11a**

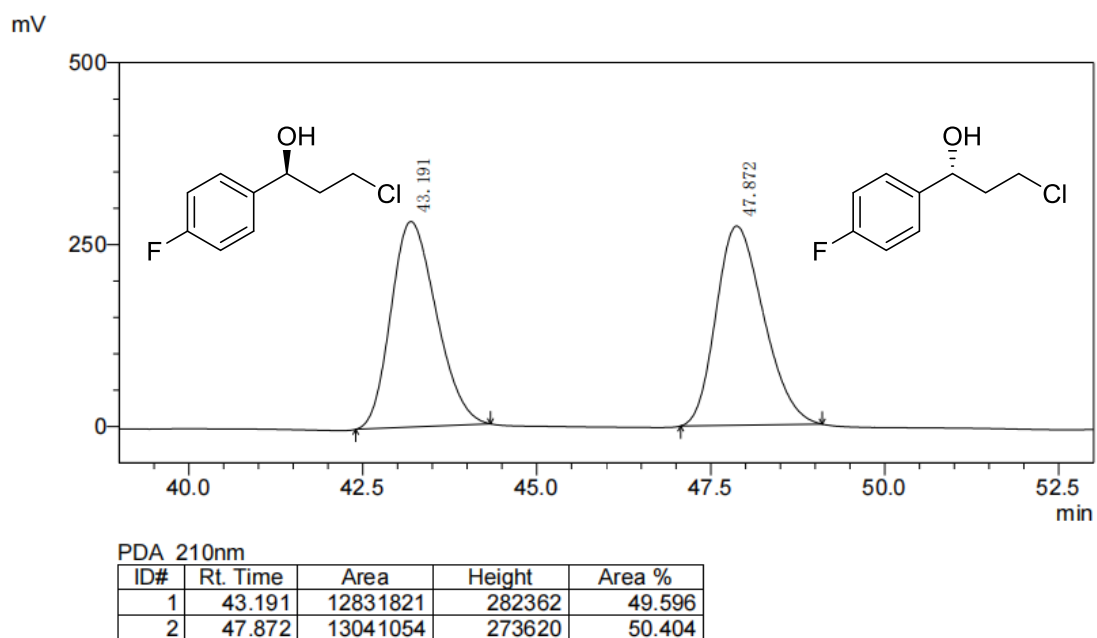

### Enzymatic synthesized (*S*)-**11a**

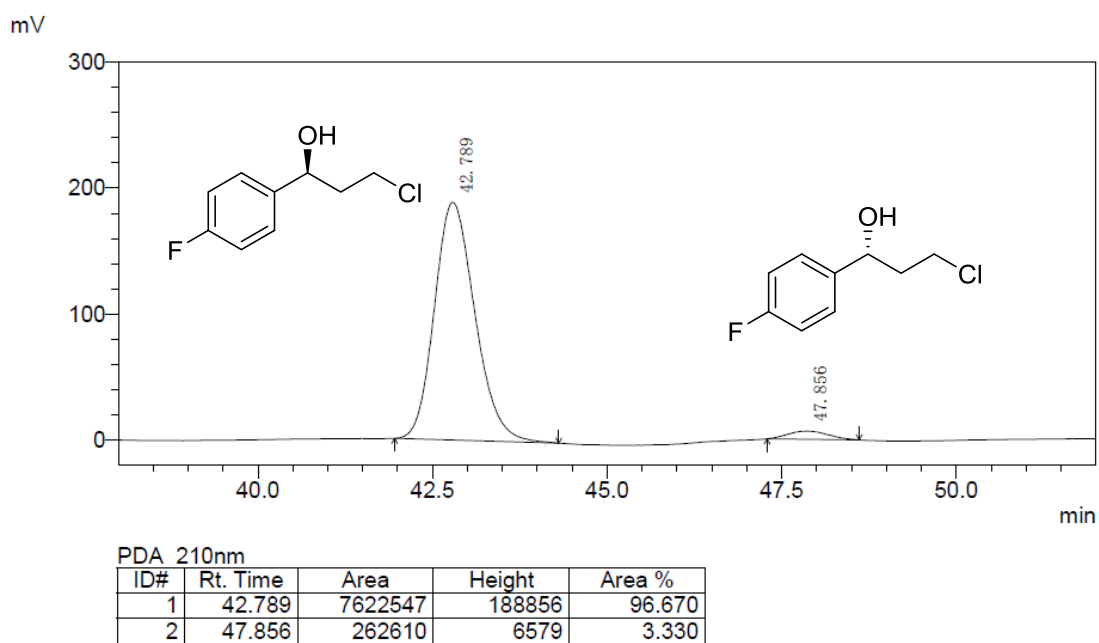

**Chiral HPLC analysis:** Diacel Chiralpak OX-3, *n*-hexane/*i*-PrOH = 99/1, flow rate 0.5 mL/min,  $\lambda$  = 210 nm,  $t_{(S)}$  = 42.8 min,  $t_{(R)}$  = 47.9 min.

### Chemical synthesized (*rac*)-**12a**

mV

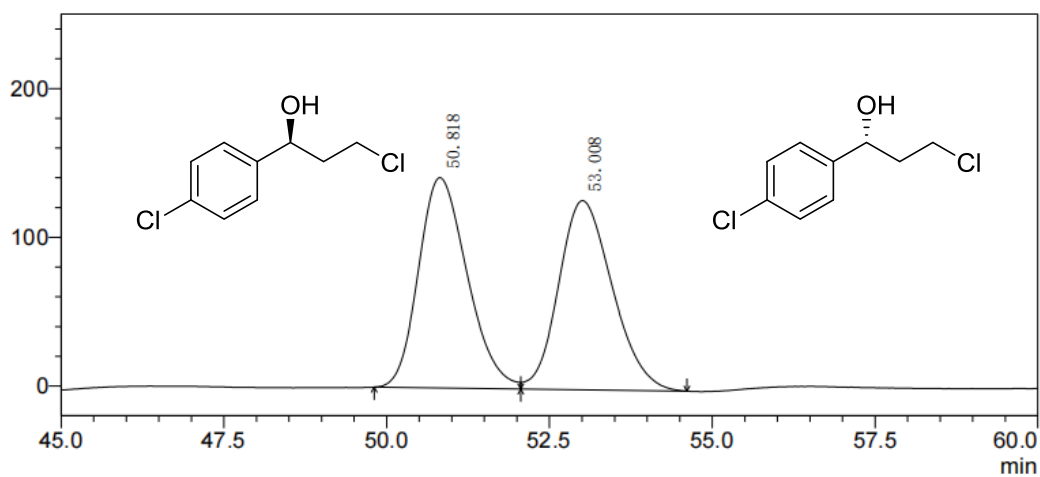

PDA 210nm

| ID# | Rt. Time | Area    | Height | Area % |
|-----|----------|---------|--------|--------|
| 1   | 50.818   | 7354674 | 141389 | 50.268 |
| 2   | 53.008   | 7276120 | 127150 | 49.732 |

### Enzymatic synthesized (*S*)-**12a**

mV

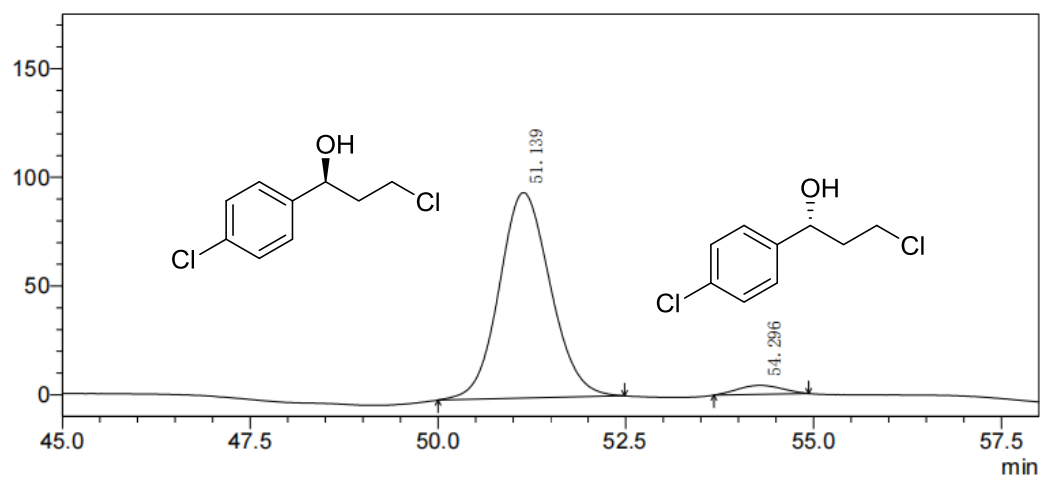

PDA 210nm

| ID# | Rt. Time | Area    | Height | Area % |
|-----|----------|---------|--------|--------|
| 1   | 51.139   | 4481146 | 94464  | 96.397 |
| 2   | 54.296   | 167486  | 4082   | 3.603  |

**Chiral HPLC analysis:** Diacel Chiralpak OX-3, *n*-hexane/*i*-PrOH = 99/1, flow rate 0.5 mL/min,  $\lambda$  = 210 nm,  $t_{(S)}$  = 51.1 min,  $t_{(R)}$  = 54.3 min.

### Chemical synthesized (*rac*)-**13a**

mV

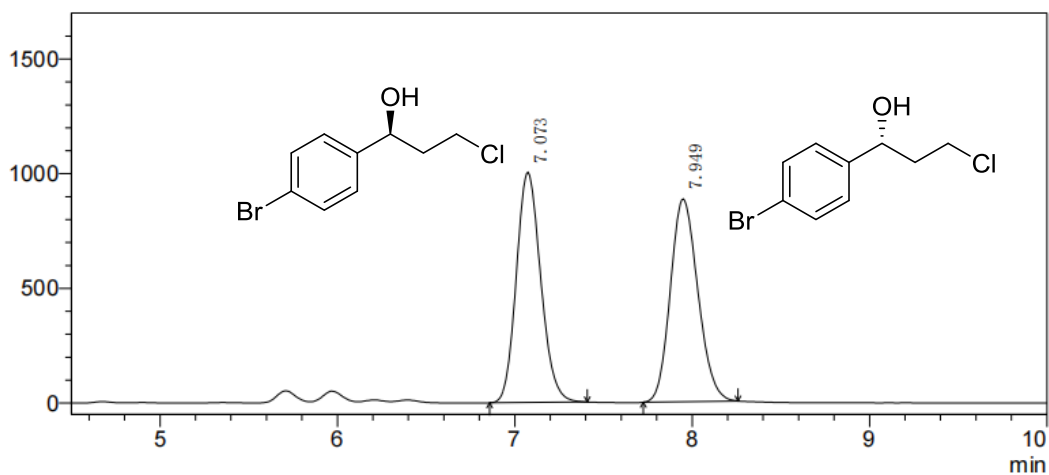

PDA 210nm

| ID# | Rt. Time | Area    | Height  | Area % |
|-----|----------|---------|---------|--------|
| 1   | 7.073    | 9615969 | 1003581 | 50.201 |
| 2   | 7.949    | 9539085 | 884114  | 49.799 |

### Enzymatic synthesized (*S*)-**13a**

mV

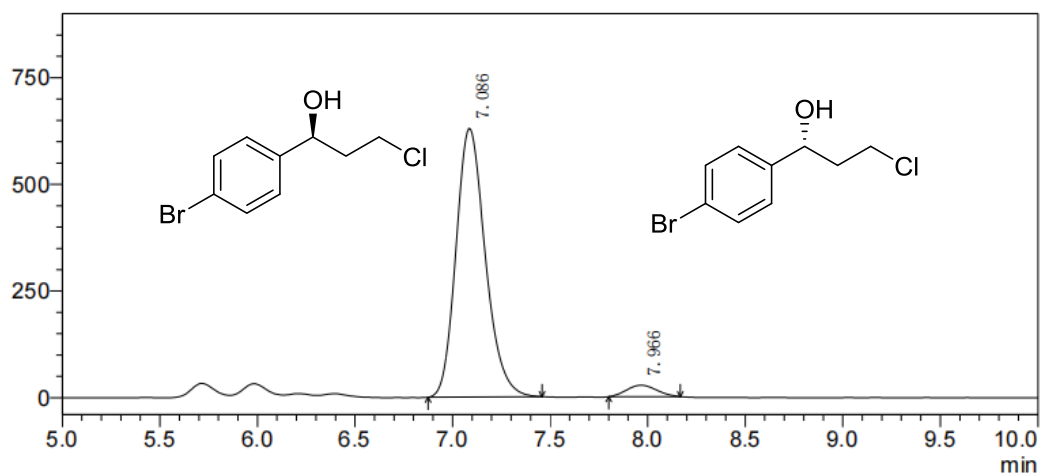

PDA 210nm

| ID# | Rt. Time | Area    | Height | Area % |
|-----|----------|---------|--------|--------|
| 1   | 7.086    | 6591918 | 629680 | 95.867 |
| 2   | 7.966    | 284204  | 26757  | 4.133  |

**Chiral HPLC analysis:** Diacel Chiralpak OD-H, *n*-hexane/*i*-PrOH = 90/10, flow rate 1.0 mL/min,  $\lambda$  = 210 nm,  $t_{(S)}$  = 7.1 min,  $t_{(R)}$  = 8.0 min.

Chemical synthesized (*rac*)-**14a**

mV

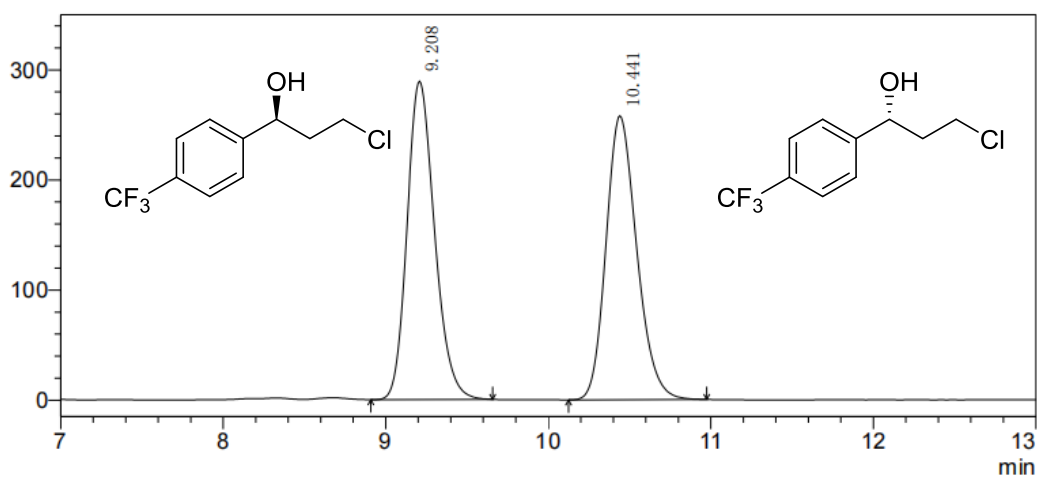

PDA 210nm

| ID# | Rt. Time | Area    | Height | Area % |
|-----|----------|---------|--------|--------|
| 1   | 9.208    | 3405433 | 289261 | 50.024 |
| 2   | 10.441   | 3402131 | 257769 | 49.976 |

Enzymatic synthesized (*S*)-**14a**

mV

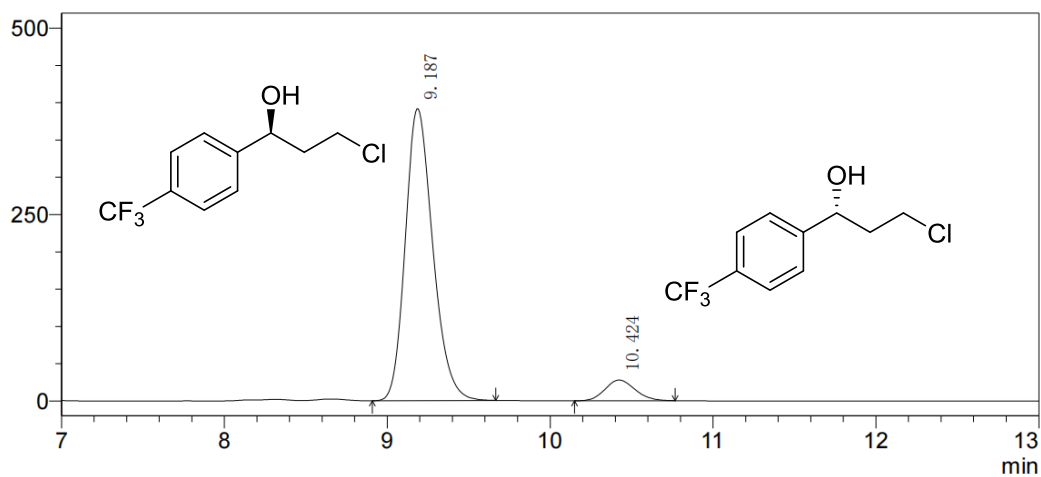

PDA 210nm

| ID# | Rt. Time | Area    | Height | Area % |
|-----|----------|---------|--------|--------|
| 1   | 9.187    | 4616016 | 391588 | 92.795 |
| 2   | 10.424   | 358394  | 27895  | 7.205  |

**Chiral HPLC analysis:** Diacel Chiralpak OX-3, *n*-hexane/*i*-PrOH = 97/3, flow rate 0.7 mL/min,  $\lambda$  = 210 nm,  $t_{(S)}$  = 9.2 min,  $t_{(R)}$  = 10.4 min.



Chemical synthesized (*rac*)-**15a**

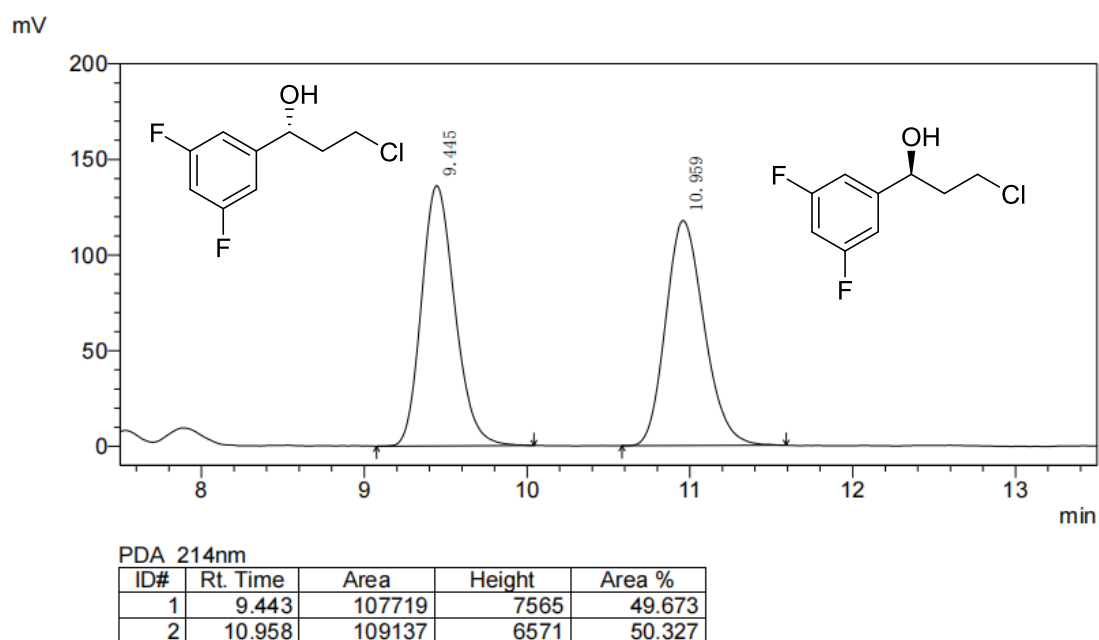

Enzymatic synthesized (*S*)-**15a**

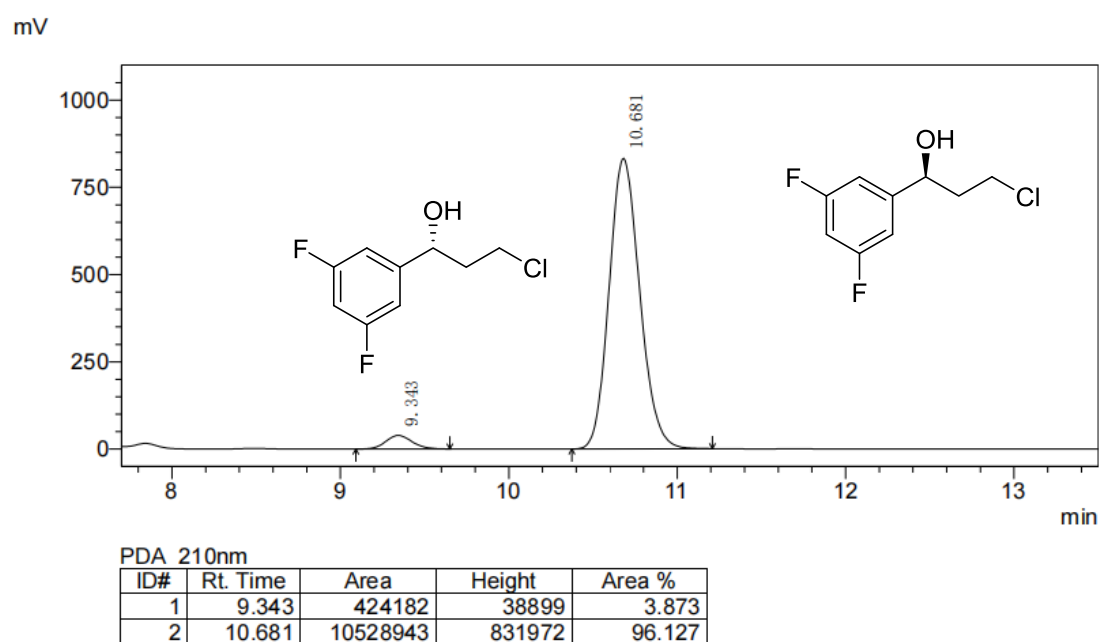

**Chiral HPLC analysis:** Diacel Chiralpak AD-H, *n*-hexane/*i*-PrOH = 95/5, flow rate 0.5 mL/min,  $\lambda$  = 210 nm,  $t_{(R)}$  = 9.3 min,  $t_{(S)}$  = 10.7 min.

Chemical synthesized (*rac*)-**16a**

mV

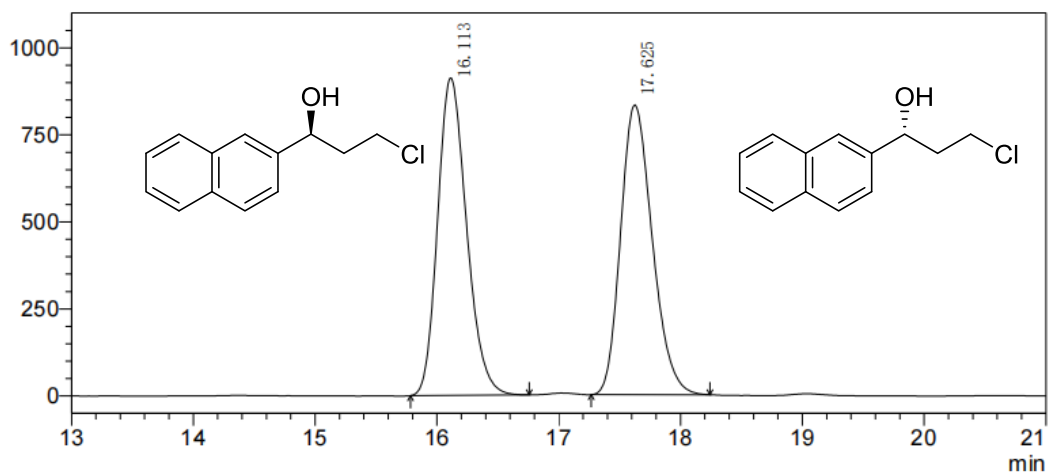

PDA 210nm

| ID# | Rt. Time | Area     | Height | Area % |
|-----|----------|----------|--------|--------|
| 1   | 16.113   | 15060137 | 911913 | 50.018 |
| 2   | 17.625   | 15049309 | 832034 | 49.982 |

Enzymatic synthesized (*S*)-**16a**

mV

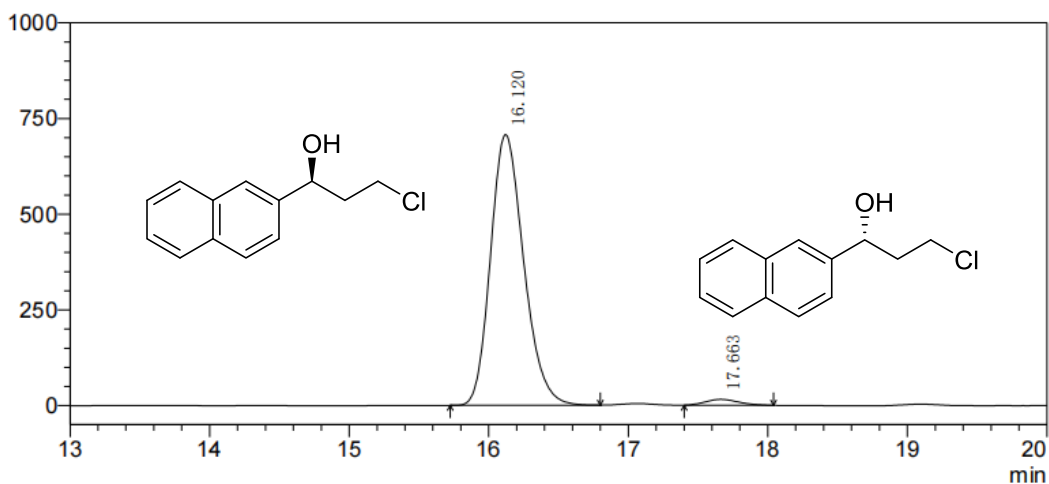

PDA 210nm

| ID# | Rt. Time | Area     | Height | Area % |
|-----|----------|----------|--------|--------|
| 1   | 16.120   | 11691594 | 707301 | 97.852 |
| 2   | 17.663   | 256644   | 15384  | 2.148  |

**Chiral HPLC analysis:** Diacel Chiralpak OX-3, *n*-hexane/*i*-PrOH = 97/3, flow rate 0.7 mL/min,  $\lambda$  = 210 nm,  $t_{(S)}$  = 16.1 min,  $t_{(R)}$  = 17.7 min.

Chemical synthesized (*rac*)-**17a**

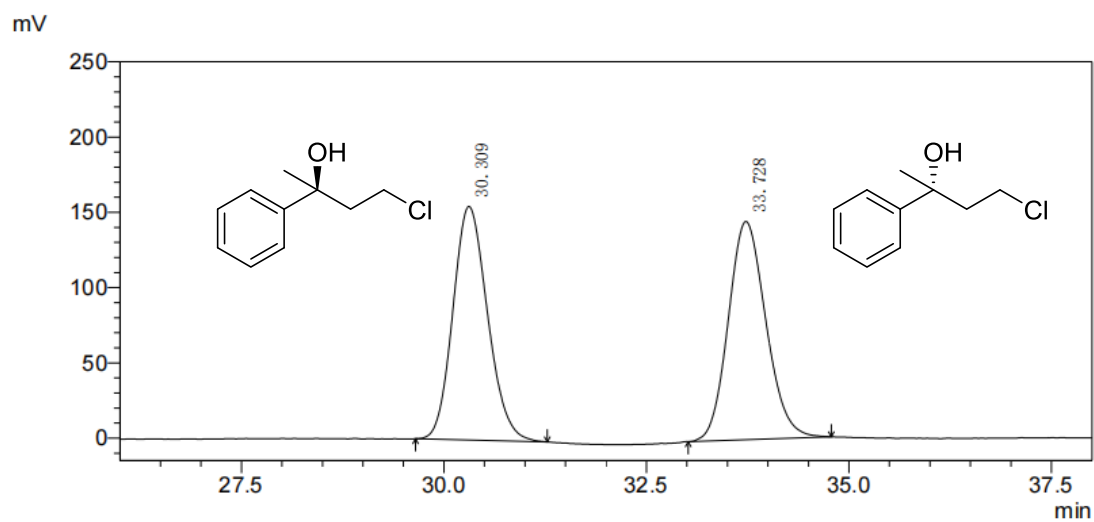

PDA 210nm

| ID# | Rt. Time | Area    | Height | Area % |
|-----|----------|---------|--------|--------|
| 1   | 30.309   | 4623106 | 155207 | 49.697 |
| 2   | 33.728   | 4679505 | 144950 | 50.303 |

Enzymatic synthesized (*S*)-**17a**

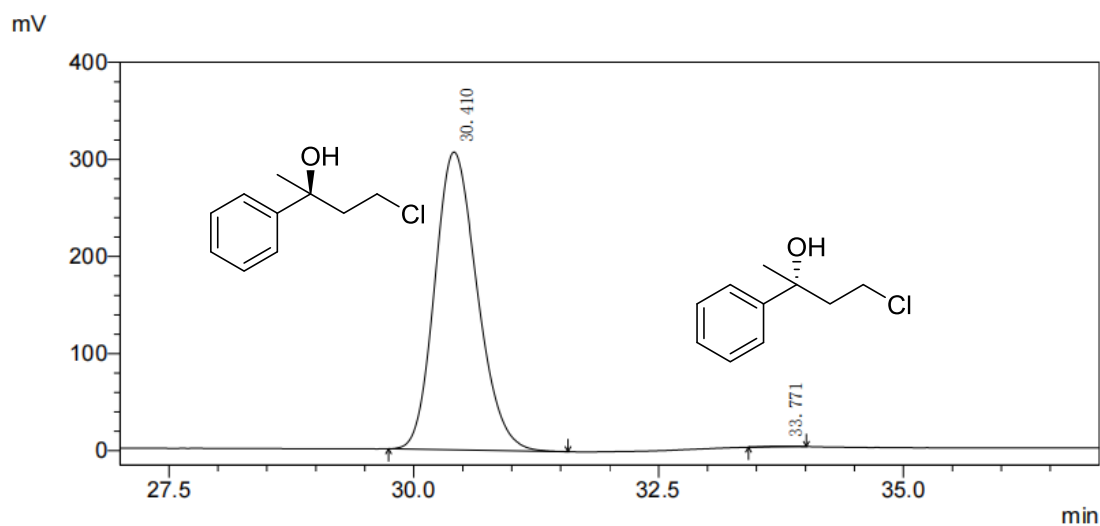

PDA 210nm

| ID# | Rt. Time | Area    | Height | Area % |
|-----|----------|---------|--------|--------|
| 1   | 30.410   | 9251269 | 306687 | 99.849 |
| 2   | 33.771   | 14014   | 657    | 0.151  |

**Chiral HPLC analysis:** Diacel Chiralpak OX-3, *n*-hexane/*i*-PrOH = 99/1, flow rate 0.5 mL/min,  $\lambda$  = 210 nm,  $t_{(S)}$  = 30.4 min,  $t_{(R)}$  = 33.8 min.

### Chemical synthesized (*rac*)-**18a**

mV

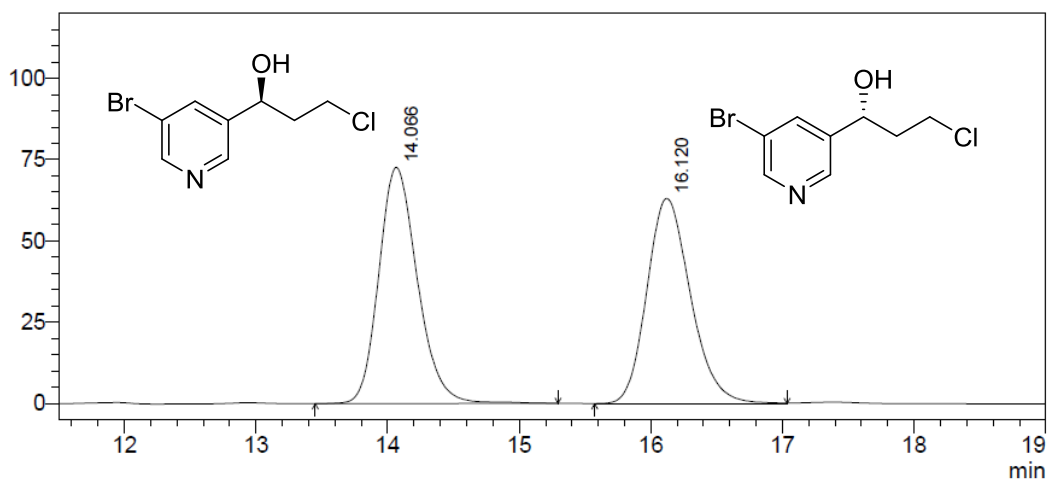

PDA 210nm

| ID# | Rt. Time | Area    | Height | Area%  |
|-----|----------|---------|--------|--------|
| 1   | 14.066   | 1486534 | 72703  | 50.506 |
| 2   | 16.120   | 1456738 | 63135  | 49.494 |

### Enzymatic synthesized (*S*)-**18a**

mV

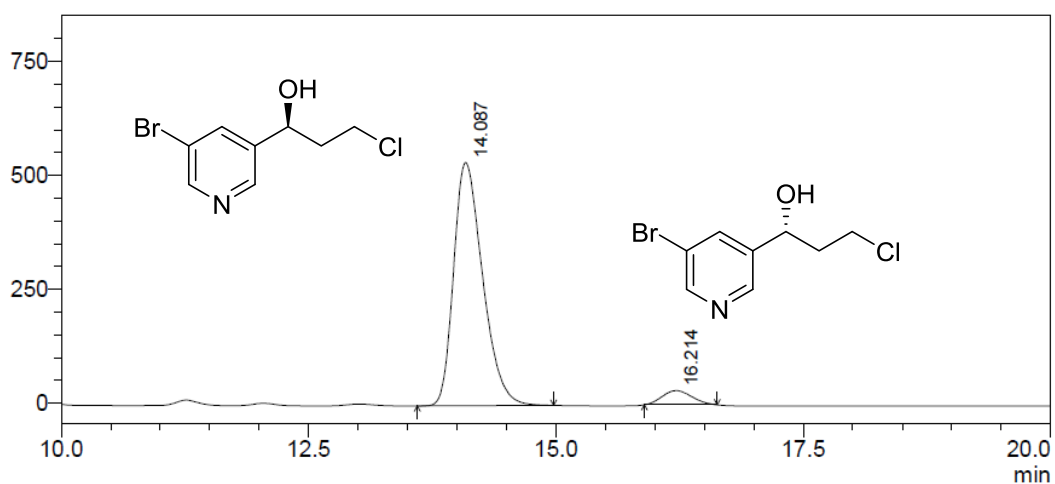

PDA 210nm

| ID# | Rt. Time | Area     | Height | Area%  |
|-----|----------|----------|--------|--------|
| 1   | 14.087   | 10890307 | 533487 | 94.340 |
| 2   | 16.214   | 653336   | 31126  | 5.660  |

**Chiral HPLC analysis:** Diacel Chiralpak OJ-H, *n*-hexane/*i*-PrOH = 95/5, flow rate 1.0 mL/min,  $\lambda$  = 210 nm,  $t_{(S)}$  = 14.1 min,  $t_{(R)}$  = 16.2 min.

### Chemical synthesized (*rac*)-**19a**

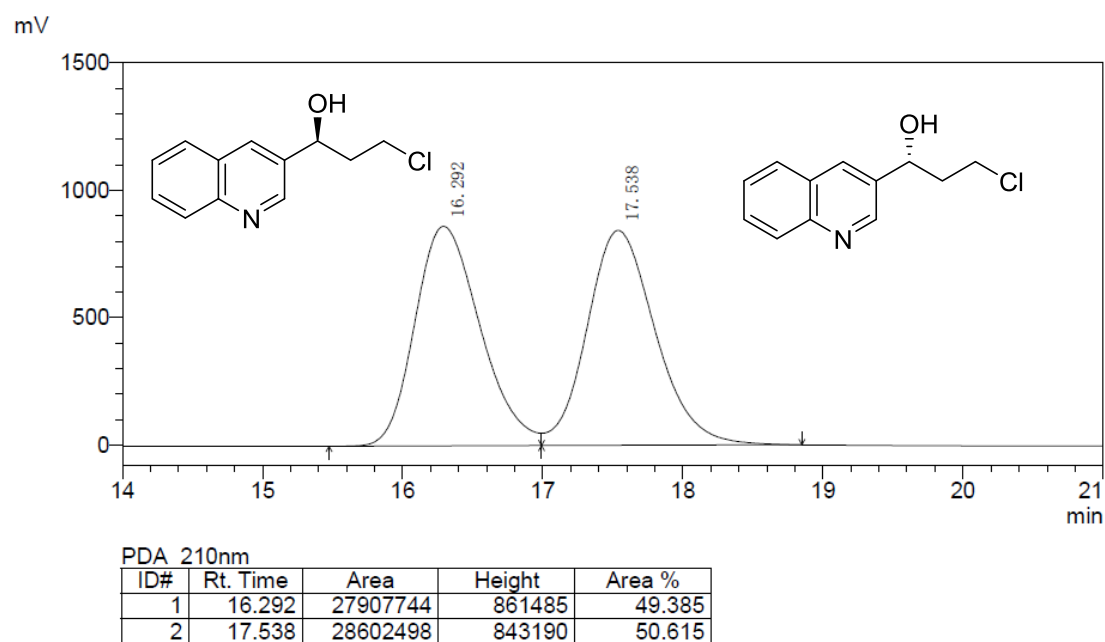

### Enzymatic synthesized (*S*)-**19a**

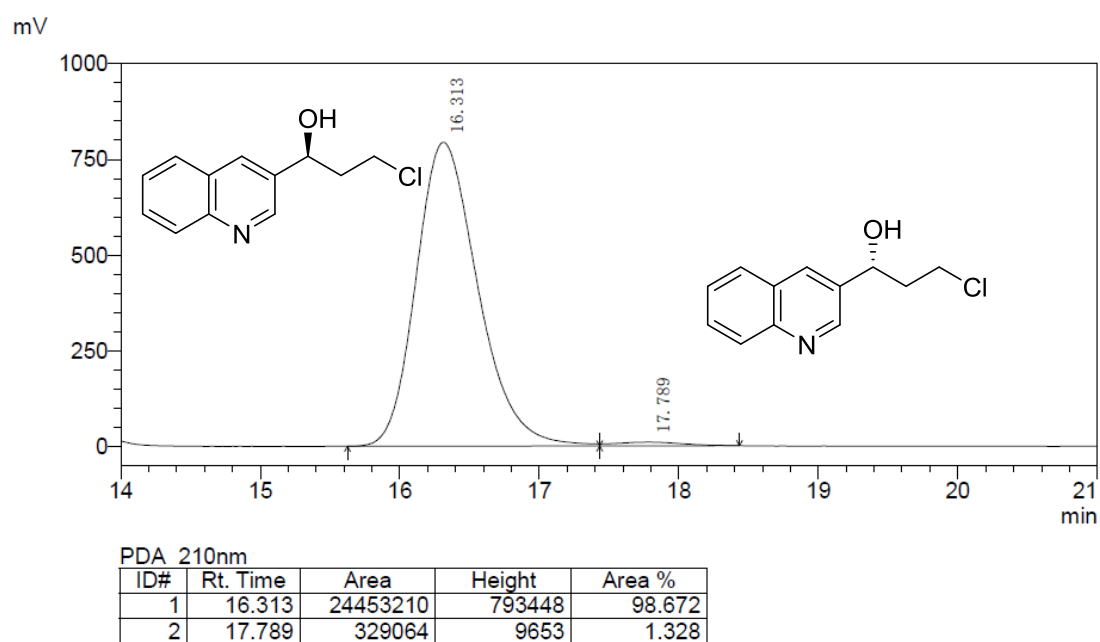

**Chiral HPLC analysis:** Diacel Chiralpak OD-H, *n*-hexane/*i*-PrOH = 90/10, flow rate 1.0 mL/min,  $\lambda = 210$  nm,  $t_{(S)} = 16.3$  min,  $t_{(R)} = 17.8$  min.

Chemical synthesized (*rac*)-**20a**

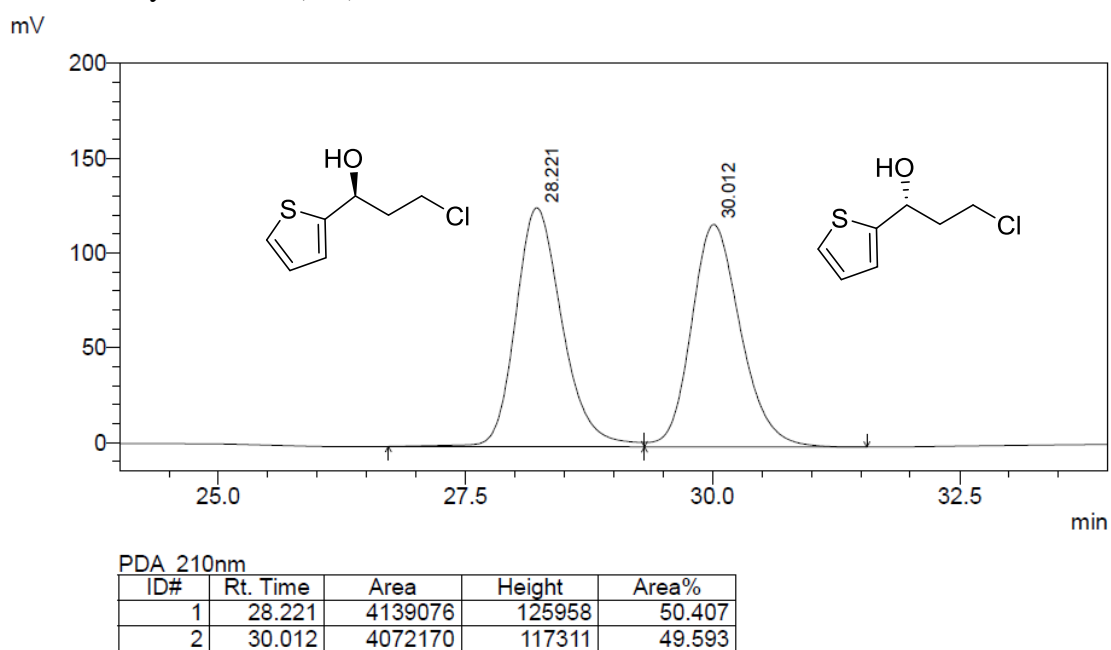

Enzymatic synthesized (*S*)-**20a**

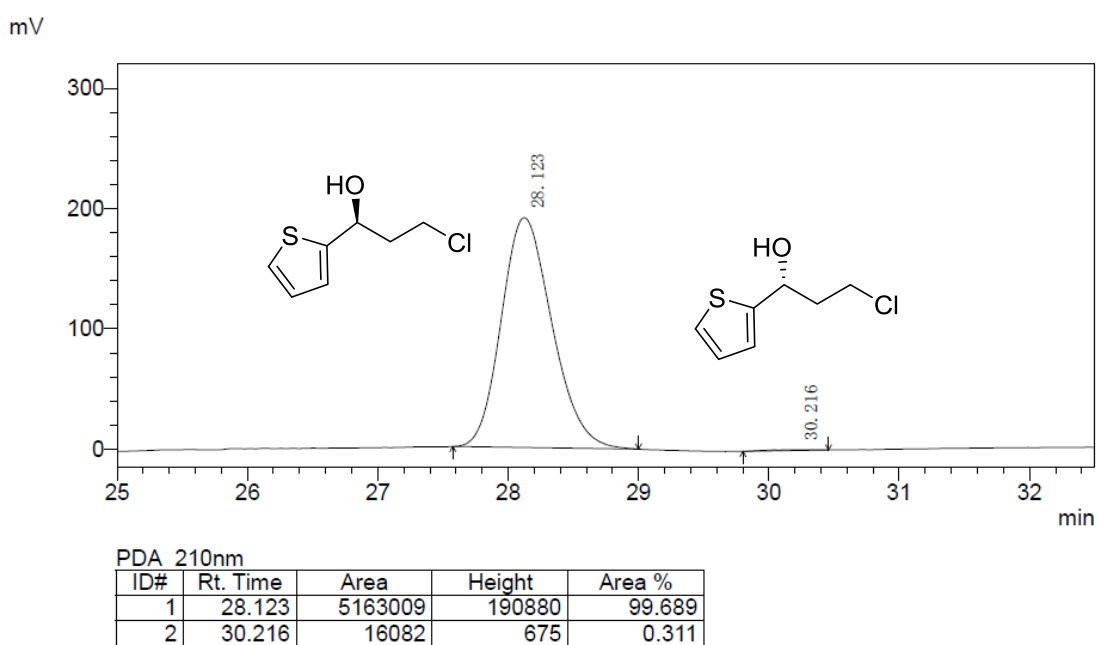

**Chiral HPLC analysis:** Diacel Chiralpak OX-3, *n*-hexane/*i*-PrOH = 98/2, flow rate 0.5 mL/min,  $\lambda$  = 210 nm,  $t_{(S)}$  = 28.1 min,  $t_{(R)}$  = 30.2 min.

### Chemical synthesized (*rac*)-**21a**

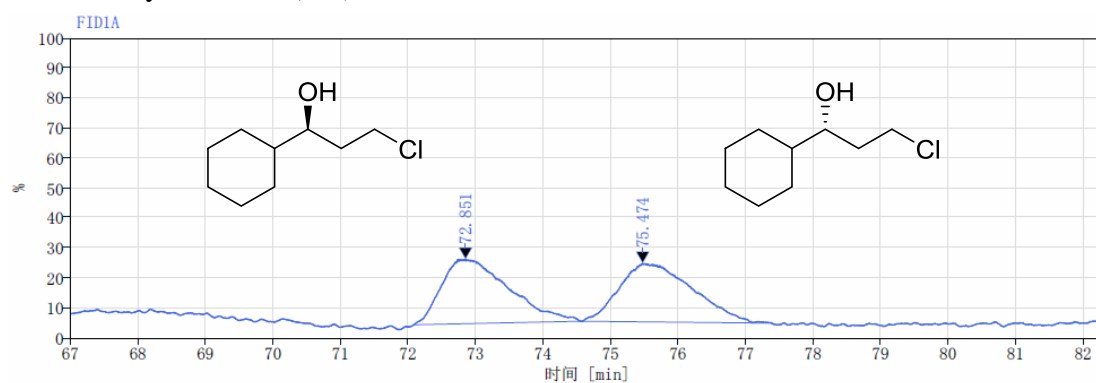

FID1A

| RT. Time [min] | Area   | Area% |
|----------------|--------|-------|
| 72.851         | 239.03 | 50.18 |
| 75.474         | 237.33 | 49.82 |
| Total          | 476.36 |       |

### Enzymatic synthesized (*S*)-**21a**

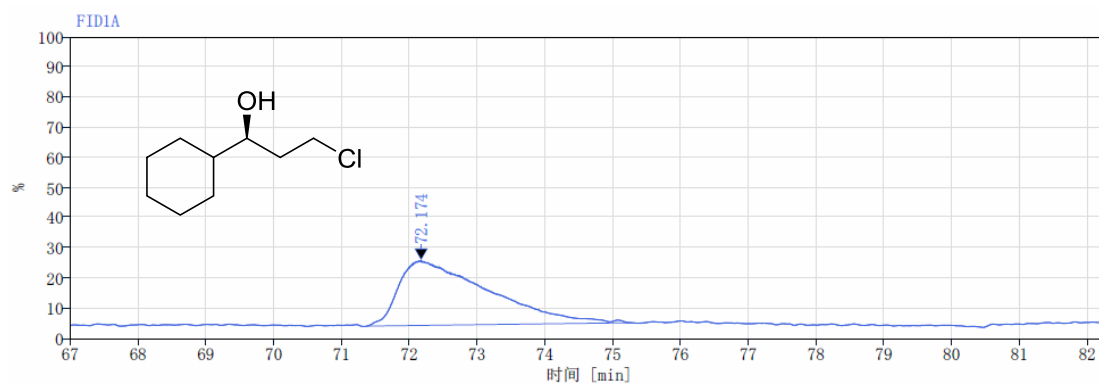

FID1A

| RT. Time [min] | Area   | Area%  |
|----------------|--------|--------|
| 72.174         | 800.98 | 100.00 |
| Total          | 800.98 |        |

**Chiral GC analysis:** CYCLODEX-B, 110 °C for 85 min,  $t_{(S)} = 72.2$  min,  $t_{(R)} = 75.5$  min..

### Chemical synthesized (*rac*)-**22a**

mV

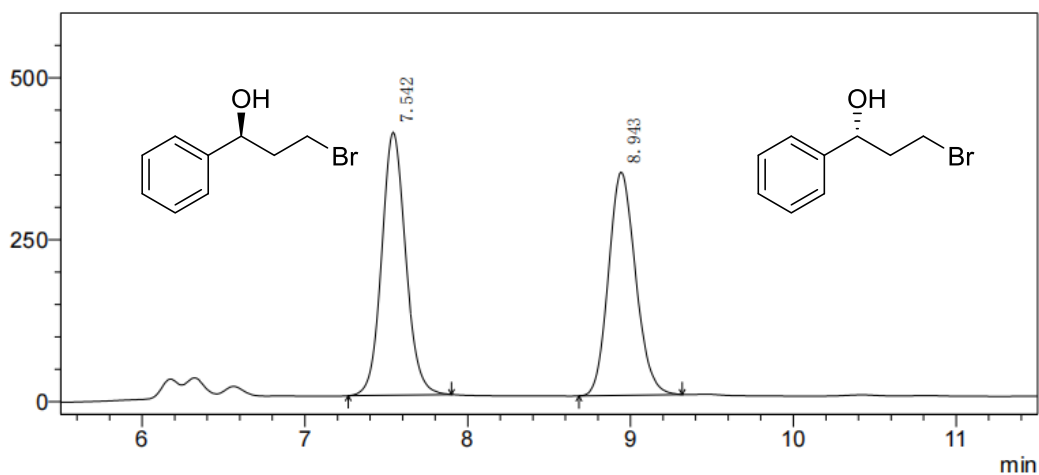

PDA 210nm

| ID# | Rt. Time | Area    | Height | Area % |
|-----|----------|---------|--------|--------|
| 1   | 7.542    | 4166331 | 405994 | 50.972 |
| 2   | 8.943    | 4007396 | 344770 | 49.028 |

### Enzymatic synthesized (*S*)-**22a**

mV

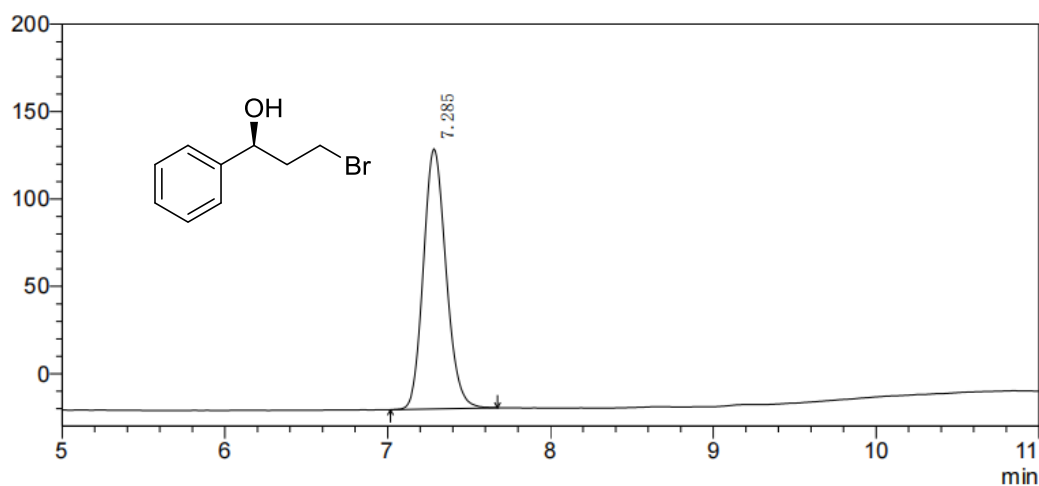

PDA 210nm

| ID# | Rt. Time | Area    | Height | Area %  |
|-----|----------|---------|--------|---------|
| 1   | 7.285    | 1435713 | 148674 | 100.000 |

**Chiral HPLC analysis:** Diacel Chiralpak OD-H, *n*-hexane/*i*-PrOH = 90/10, flow rate 1.0 mL/min,  $\lambda$  = 210 nm,  $t_{(S)}$  = 7.3 min,  $t_{(R)}$  = 8.9 min..



Chemical synthesized (*rac*)-**23a**

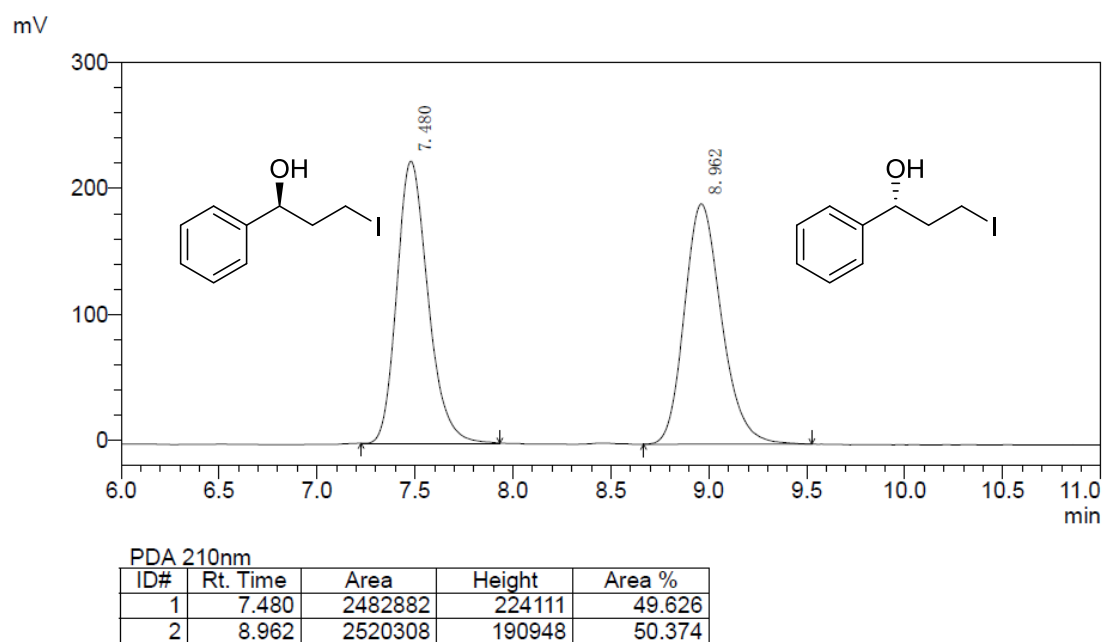

Enzymatic synthesized (*S*)-**23a**

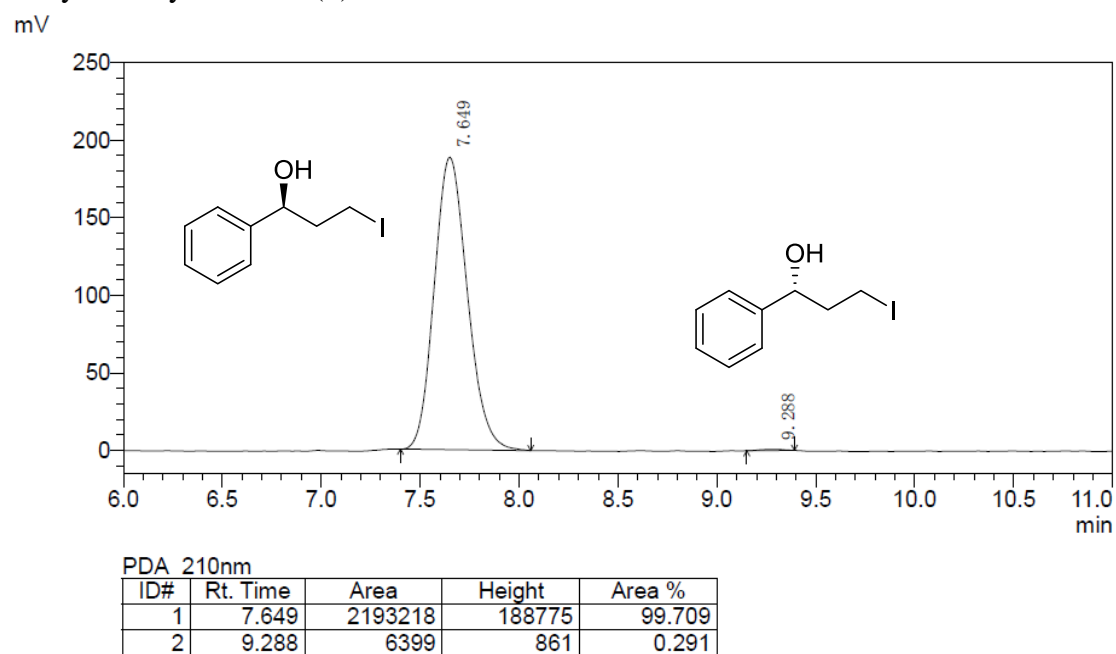

**Chiral HPLC analysis:** Diacel Chiralpak OD-H, *n*-hexane/*i*-PrOH = 90/10, flow rate 1.0 mL/min,  $\lambda$  = 210 nm,  $t_{(S)}$  = 7.6 min,  $t_{(R)}$  = 9.3 min.

### Chemical synthesized (*rac*)-**1b**

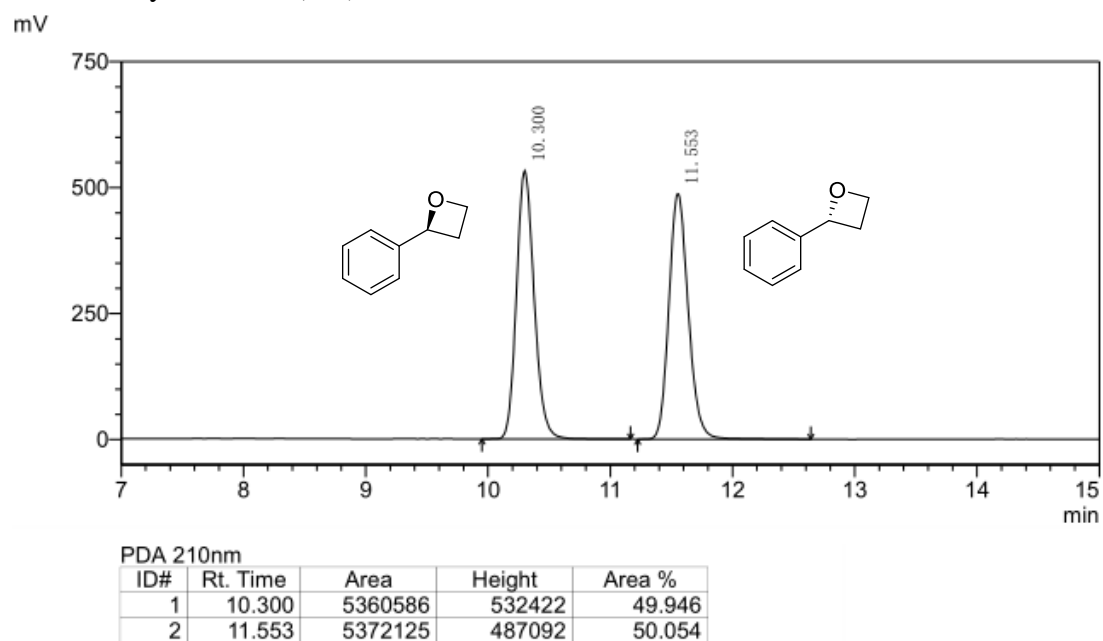

### Enzymatic synthesized (*S*)-**1b** (Ring opening by azide)

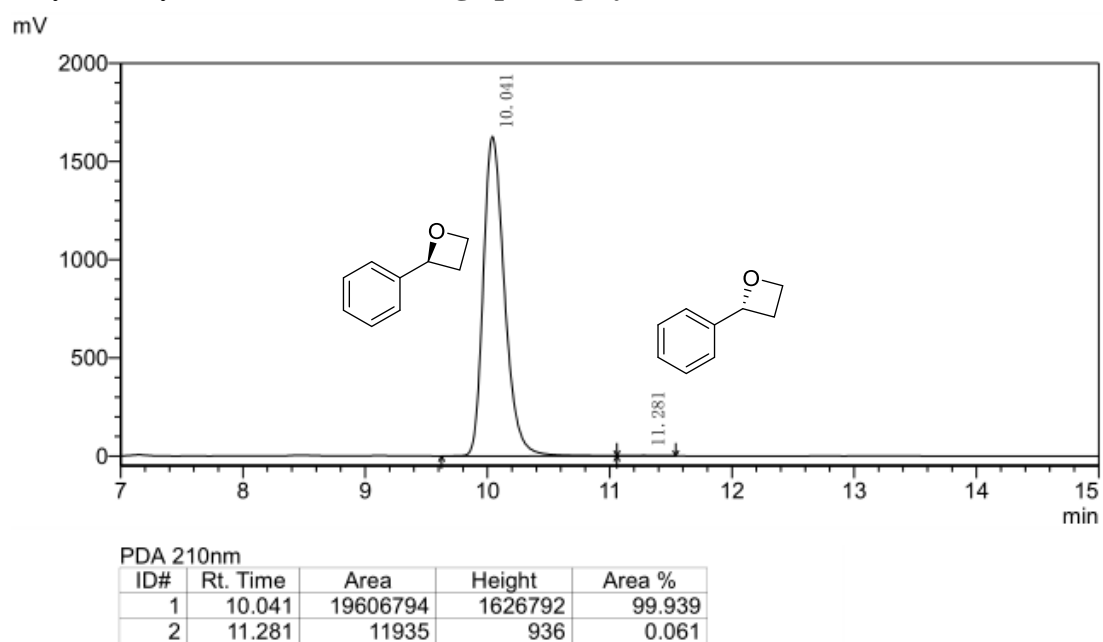

Enzymatic synthesized (*S*)-**1b** (Ring opening by cyanide)

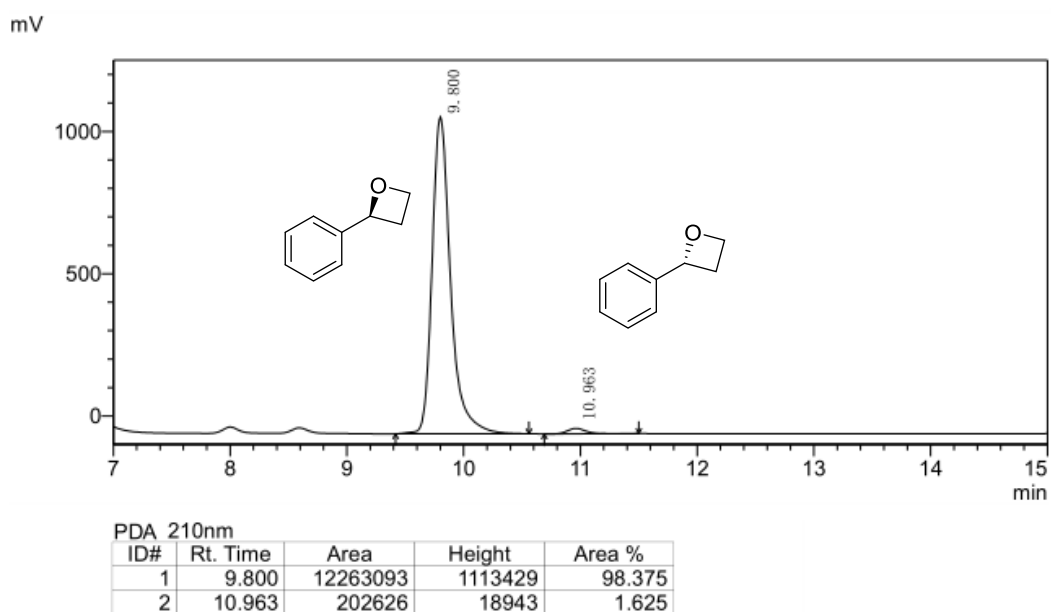

Enzymatic synthesized (*S*)-**1b** (Ring opening by nitrite)

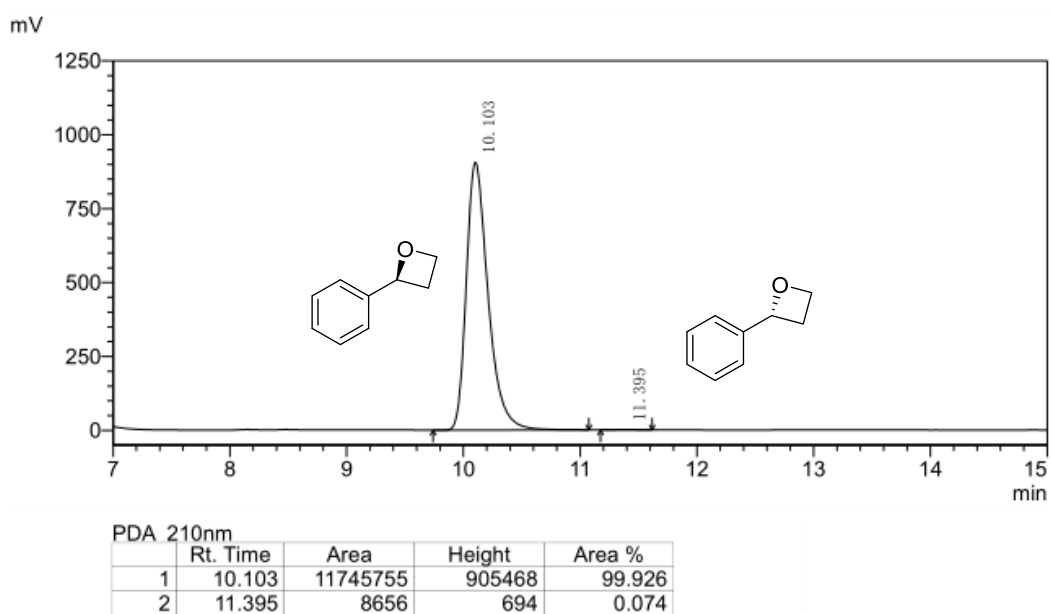

**Chiral HPLC analysis:** Diacel Chiralpak OX-3, *n*-hexane/*i*-PrOH = 97/3, flow rate 0.7 mL/min,  $\lambda$  = 210 nm,  $t_{(S)}$  = 10.3 min,  $t_{(R)}$  = 11.6 min.

Chemical synthesized (*rac*)-**2b**

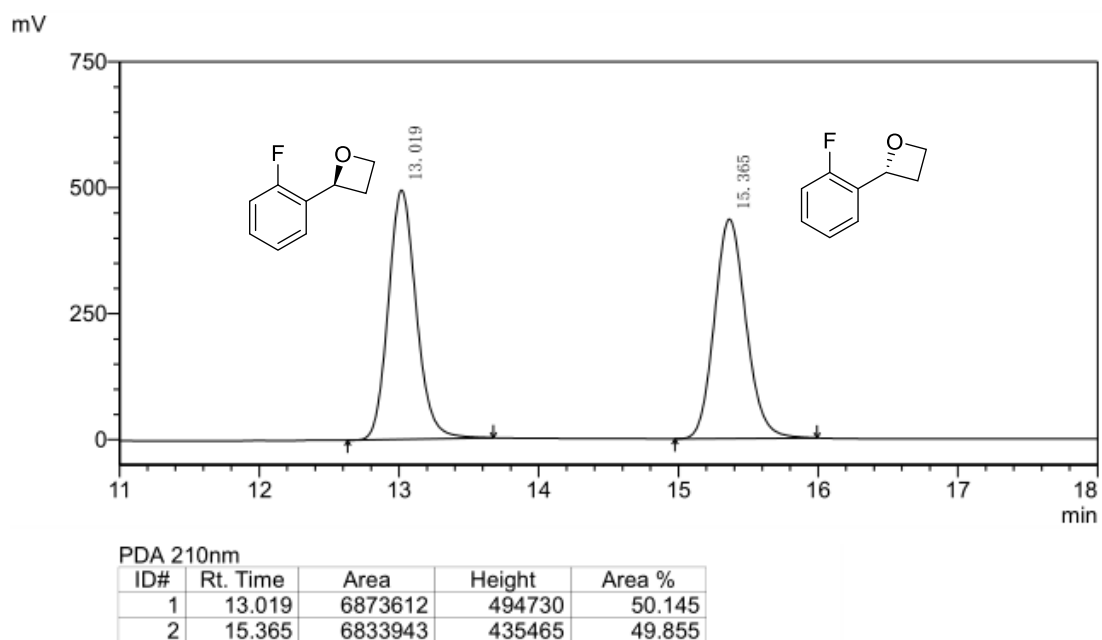

Enzymatic synthesized (*S*)-**2b**

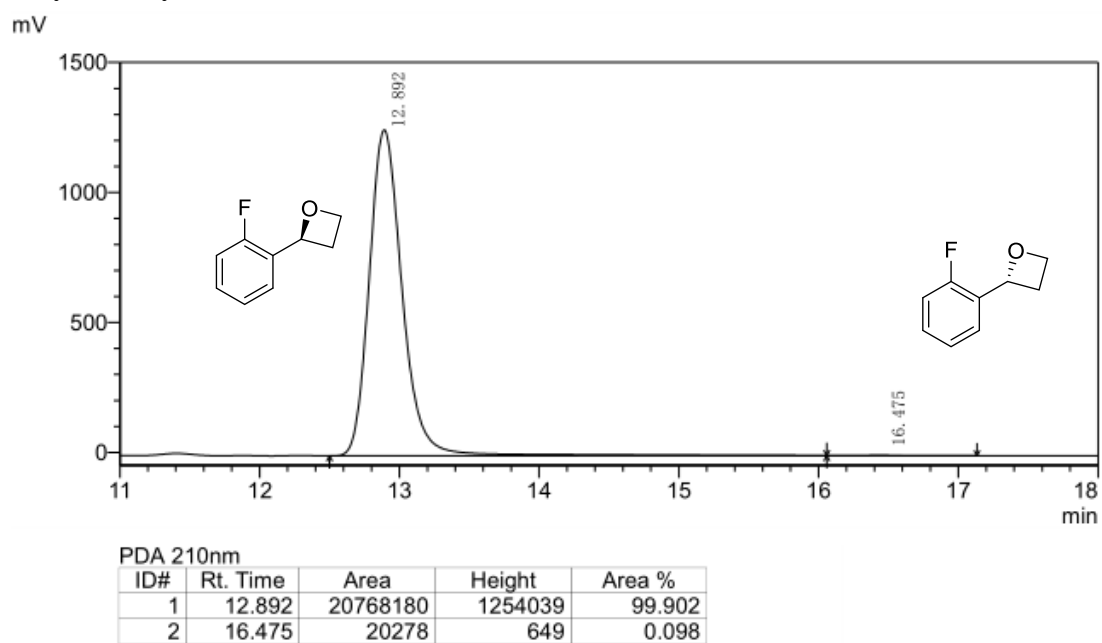

**Chiral HPLC analysis:** Diacel Chiralpak OX-3, *n*-hexane/*i*-PrOH = 99/1, flow rate 0.5 mL/min,  $\lambda$  = 210 nm,  $t_{(S)}$  = 12.9 min,  $t_{(R)}$  = 16.5 min.

Chemical synthesized (*rac*)-**3b**

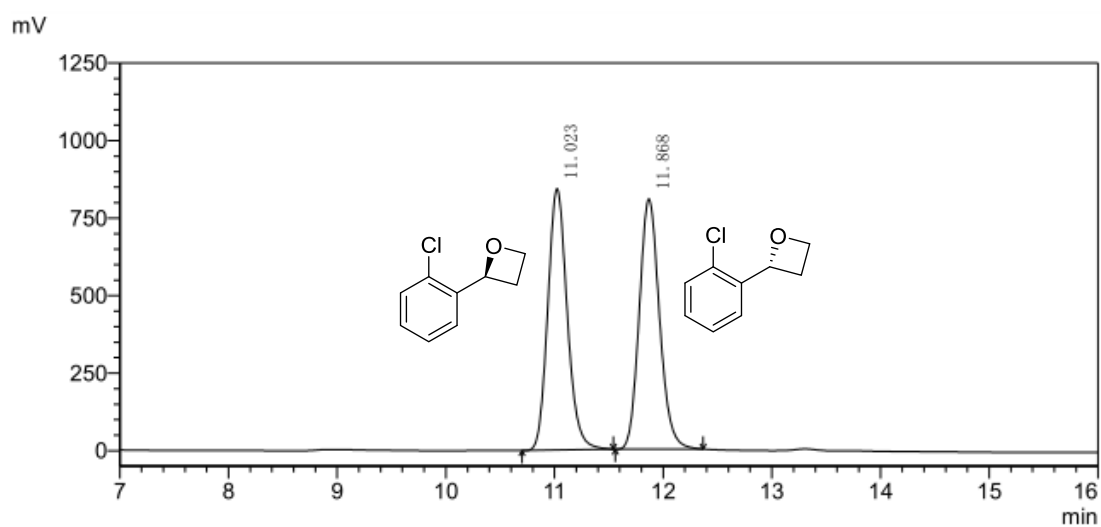

| PDA 210nm |          |          |        |        |
|-----------|----------|----------|--------|--------|
| ID#       | Rt. Time | Area     | Height | Area % |
| 1         | 11.023   | 10477966 | 842802 | 50.015 |
| 2         | 11.868   | 10471835 | 807073 | 49.985 |

Enzymatic synthesized (*S*)-**3b**

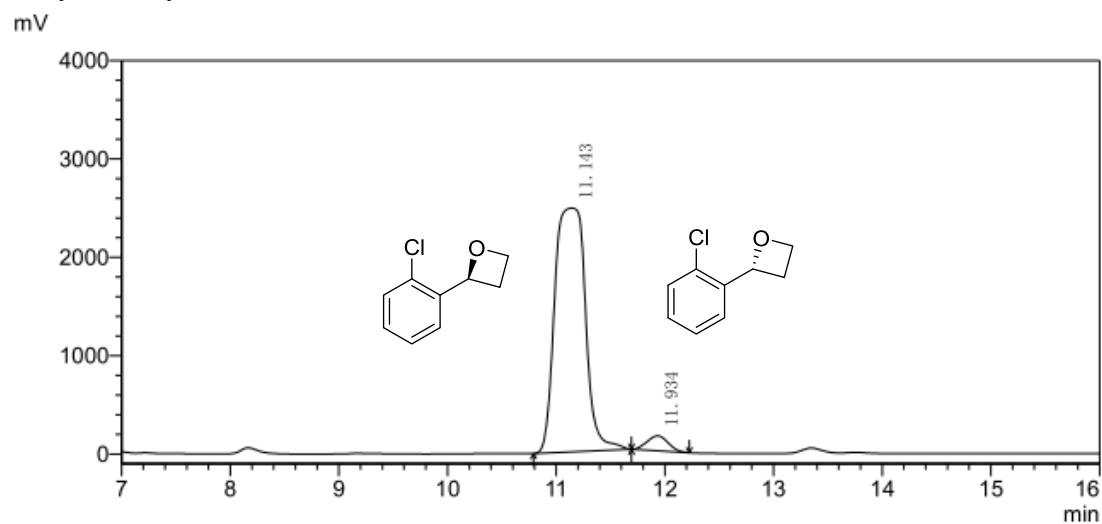

| PDA 210nm |          |          |         |        |
|-----------|----------|----------|---------|--------|
| ID#       | Rt. Time | Area     | Height  | Area % |
| 1         | 11.143   | 48580461 | 2480612 | 95.915 |
| 2         | 11.934   | 2068838  | 153675  | 4.085  |

**Chiral HPLC analysis:** Diacel Chiralpak OX-3, *n*-hexane/*i*-PrOH = 99/1, flow rate 0.5 mL/min,  $\lambda$  = 210 nm,  $t_{(S)}$  = 11.1 min,  $t_{(R)}$  = 11.9 min.

Chemical synthesized (*rac*)-**4b**

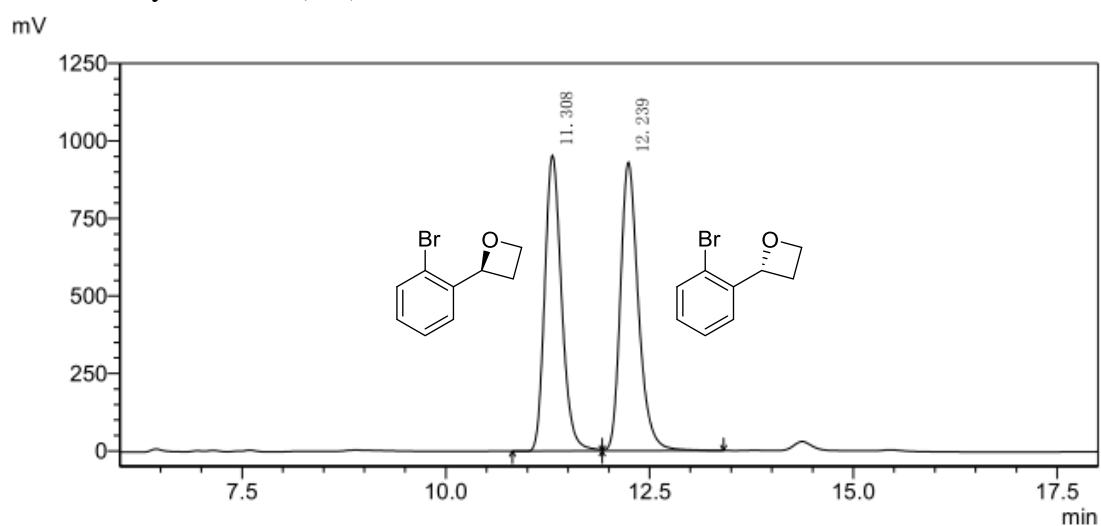

| ID# | Rt. Time | Area     | Height | Area % |
|-----|----------|----------|--------|--------|
| 1   | 11.308   | 13680017 | 952846 | 48.911 |
| 2   | 12.239   | 14289030 | 930444 | 51.089 |

Enzymatic synthesized (*S*)-**4b**

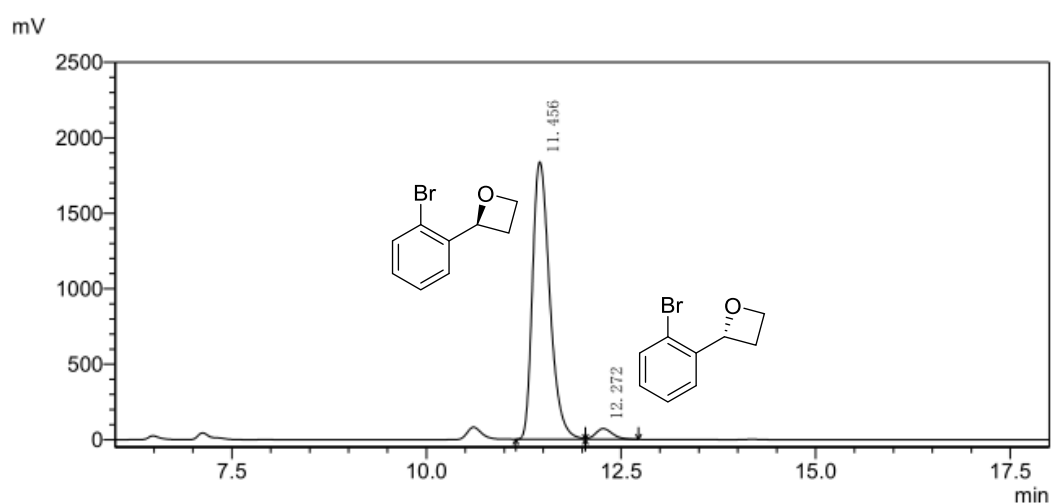

| ID# | Rt. Time | Area     | Height  | Area % |
|-----|----------|----------|---------|--------|
| 1   | 11.456   | 28335546 | 1837646 | 96.298 |
| 2   | 12.272   | 1089384  | 71537   | 3.702  |

**Chiral HPLC analysis:** Diacel Chiralpak OX-3, *n*-hexane/*i*-PrOH = 99/1, flow rate 0.5 mL/min,  $\lambda$  = 210 nm,  $t_{(S)}$  = 11.5 min,  $t_{(R)}$  = 12.3 min.

Chemical synthesized (*rac*)-**5b**

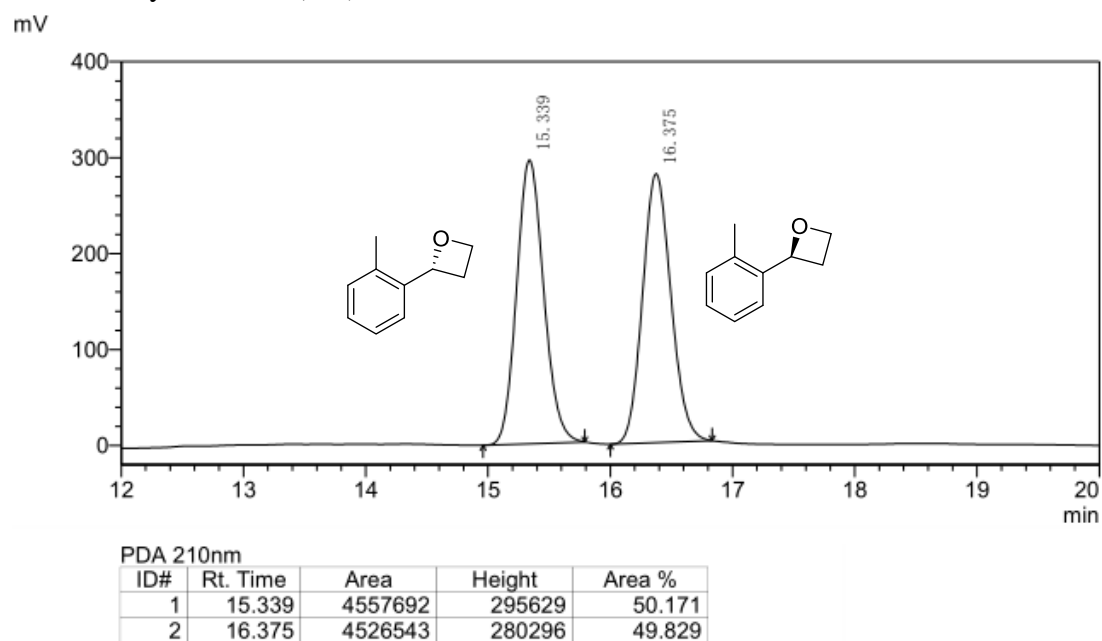

Enzymatic synthesized (*S*)-**5b**

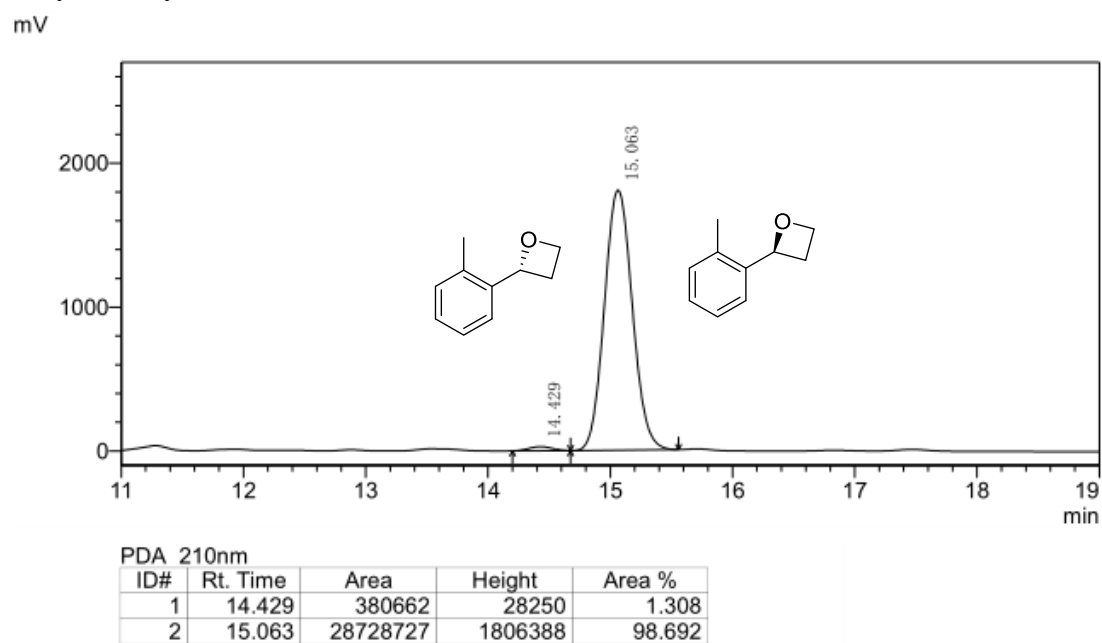

**Chiral HPLC analysis:** Diacel Chiralpak OX-3, *n*-hexane/*i*-PrOH = 99/1, flow rate 0.5 mL/min,  $\lambda$  = 210 nm,  $t_{(R)}$  = 14.4 min,  $t_{(S)}$  = 15.1 min.

Chemical synthesized (*rac*)-**6b**

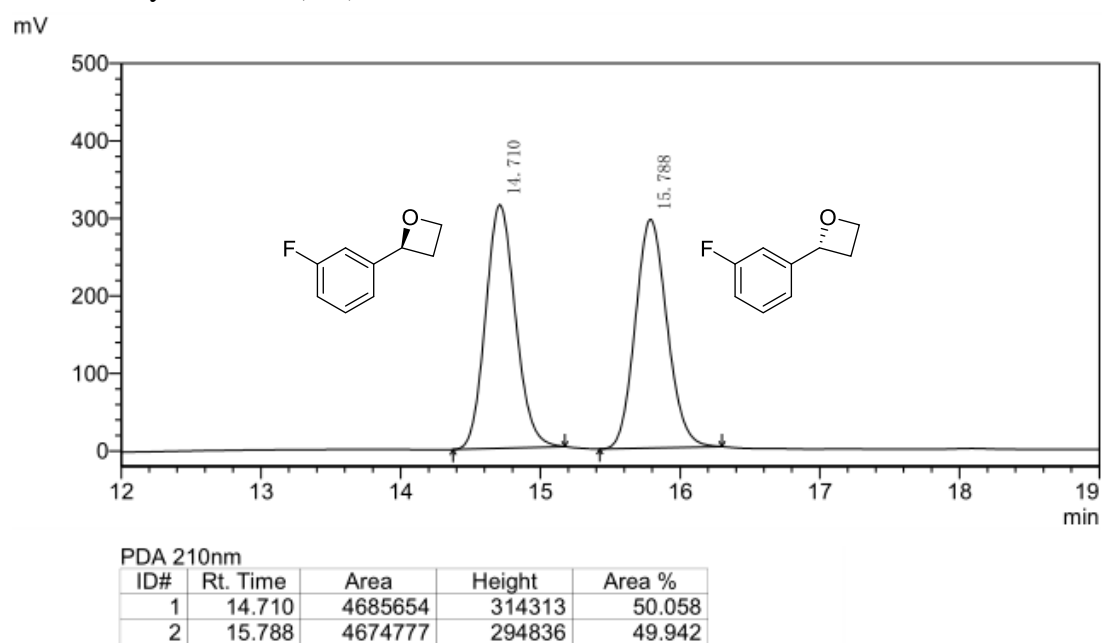

Enzymatic synthesized (*S*)-**6b**

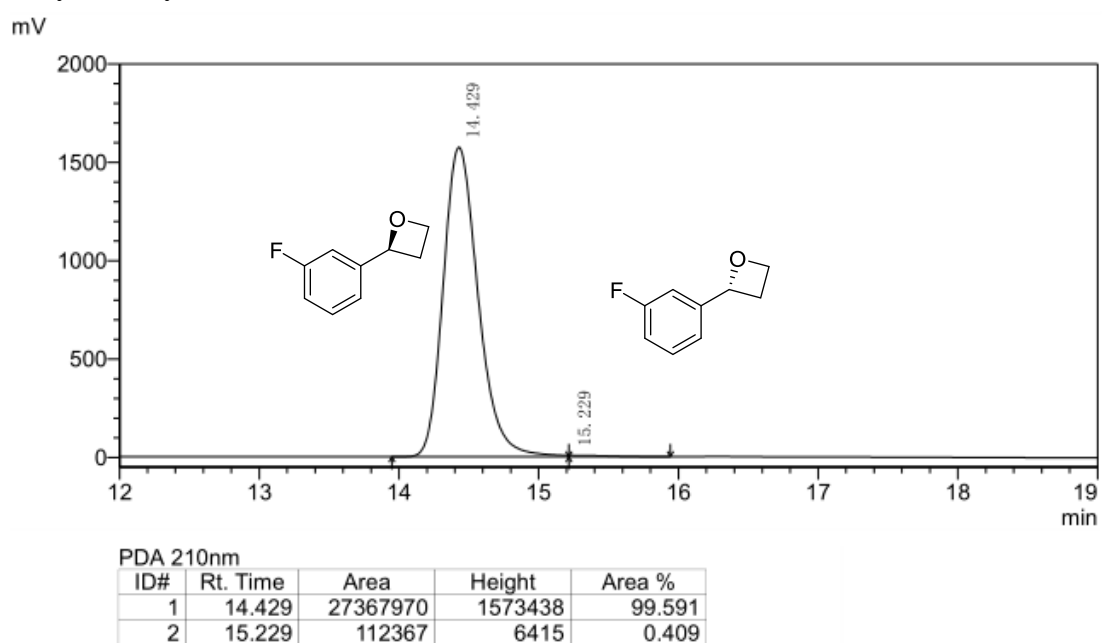

**Chiral HPLC analysis:** Diacel Chiralpak OX-3, *n*-hexane/*i*-PrOH = 99/1, flow rate 0.5 mL/min,  $\lambda$  = 210 nm,  $t_{(S)}$  = 14.4 min,  $t_{(R)}$  = 15.2 min.



Chemical synthesized (*rac*)-**7b**

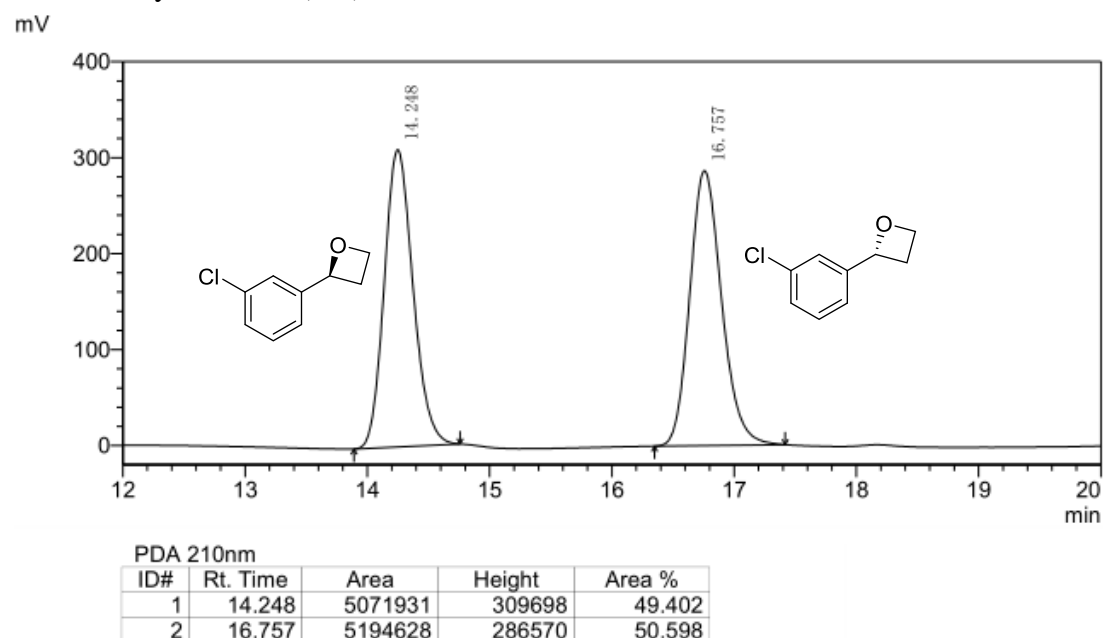

Enzymatic synthesized (*S*)-**7b**

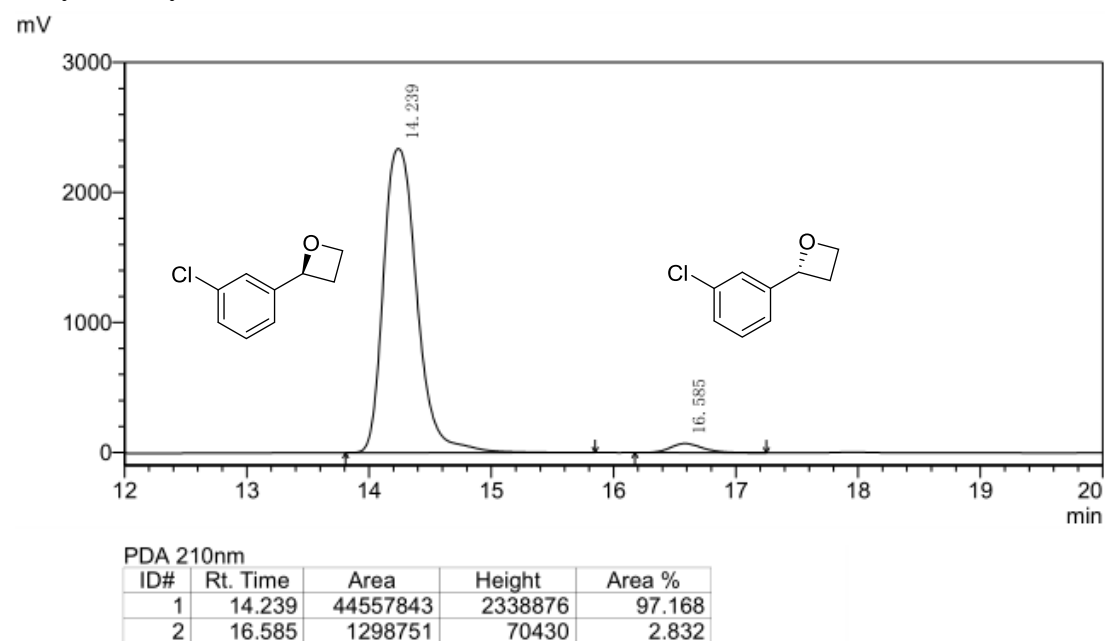

**Chiral HPLC analysis:** Diacel Chiralpak OX-3, *n*-hexane/*i*-PrOH = 99/1, flow rate 0.5 mL/min,  $\lambda$  = 210 nm,  $t_{(S)}$  = 14.2 min,  $t_{(R)}$  = 16.6 min.

Chemical synthesized (*rac*)-**8b**

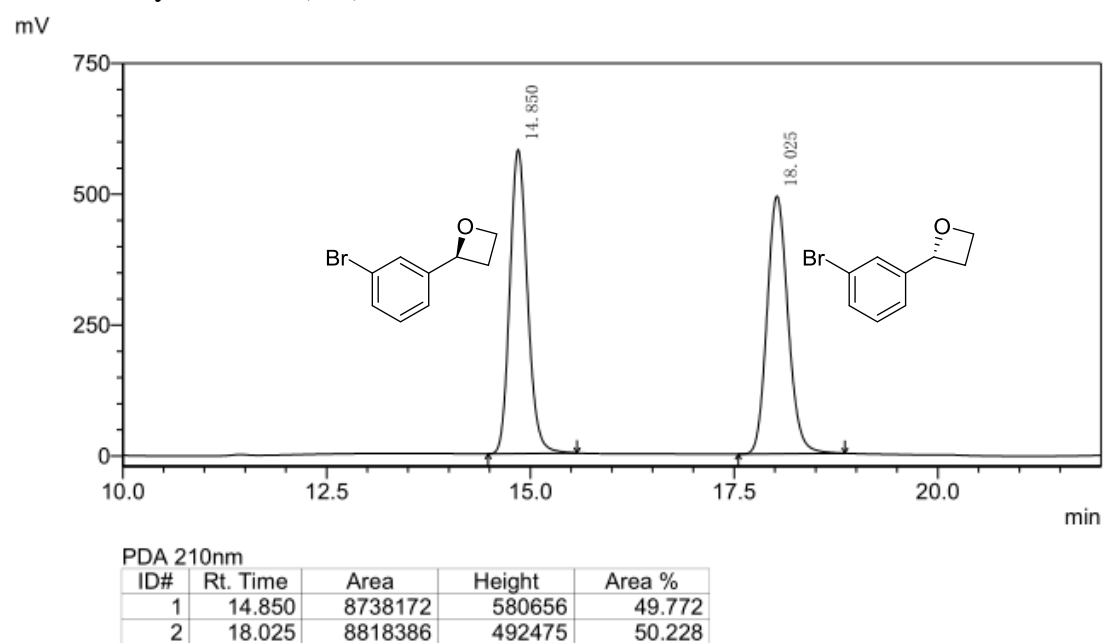

Enzymatic synthesized (*S*)-**8b**

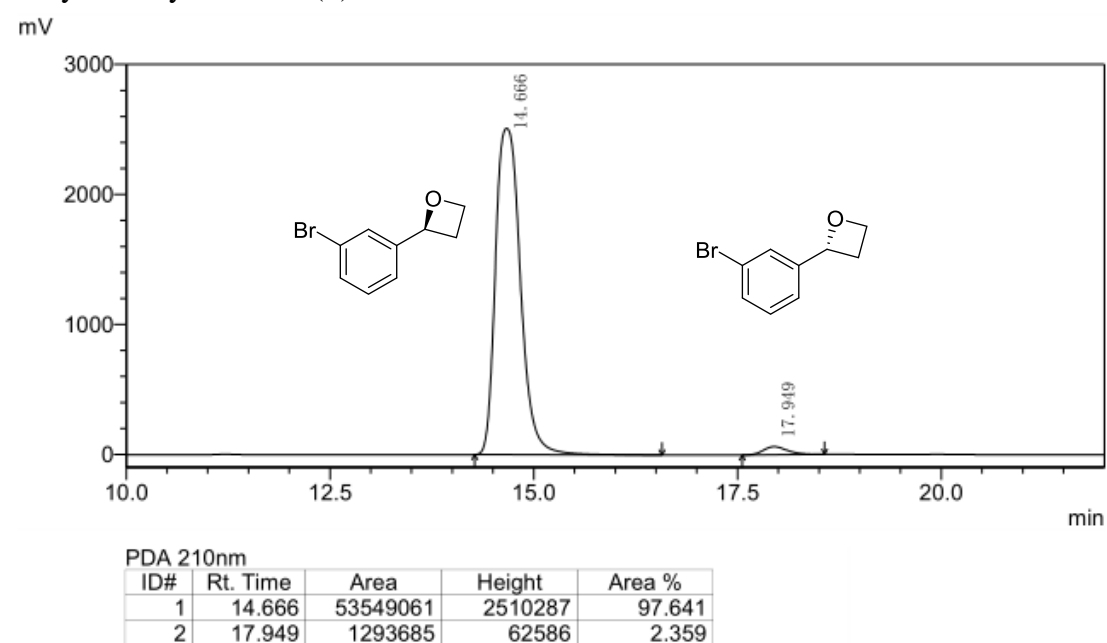

**Chiral HPLC analysis:** Diacel Chiralpak OX-3, *n*-hexane/*i*-PrOH = 99/1, flow rate 0.5 mL/min,  $\lambda$  = 210 nm,  $t_{(S)}$  = 14.7 min,  $t_{(R)}$  = 17.9 min.

Chemical synthesized (*rac*)-**9b**

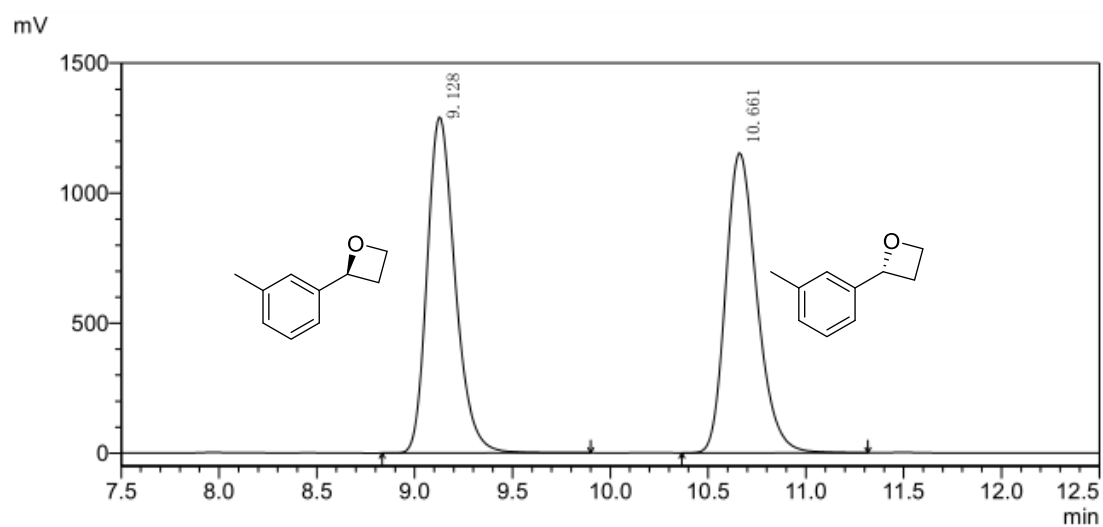

| PDA 210nm |          |          |         |        |
|-----------|----------|----------|---------|--------|
| ID#       | Rt. Time | Area     | Height  | Area % |
| 1         | 9.128    | 12828043 | 1292176 | 49.921 |
| 2         | 10.661   | 12868475 | 1153061 | 50.079 |

Enzymatic synthesized (*S*)-**9b**

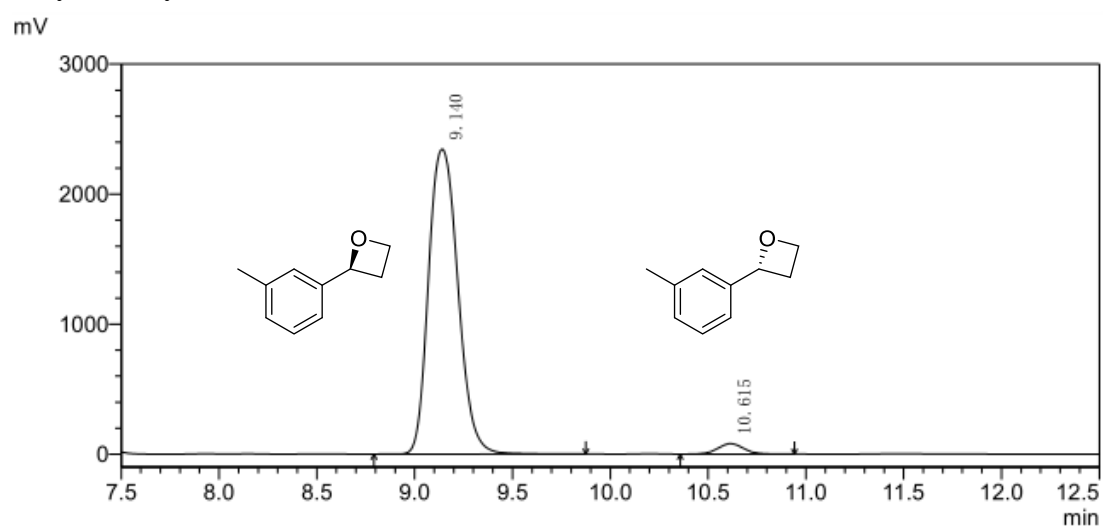

| PDA 210nm |          |          |         |        |
|-----------|----------|----------|---------|--------|
| ID#       | Rt. Time | Area     | Height  | Area % |
| 1         | 9.140    | 24440703 | 2345540 | 96.955 |
| 2         | 10.615   | 767634   | 81325   | 3.045  |

**Chiral HPLC analysis:** Diacel Chiralpak OX-3, *n*-hexane/*i*-PrOH = 97/3, flow rate 0.7 mL/min,  $\lambda$  = 210 nm,  $t_{(S)}$  = 9.1 min,  $t_{(R)}$  = 10.6 min.

Chemical synthesized (*rac*)-**10b**

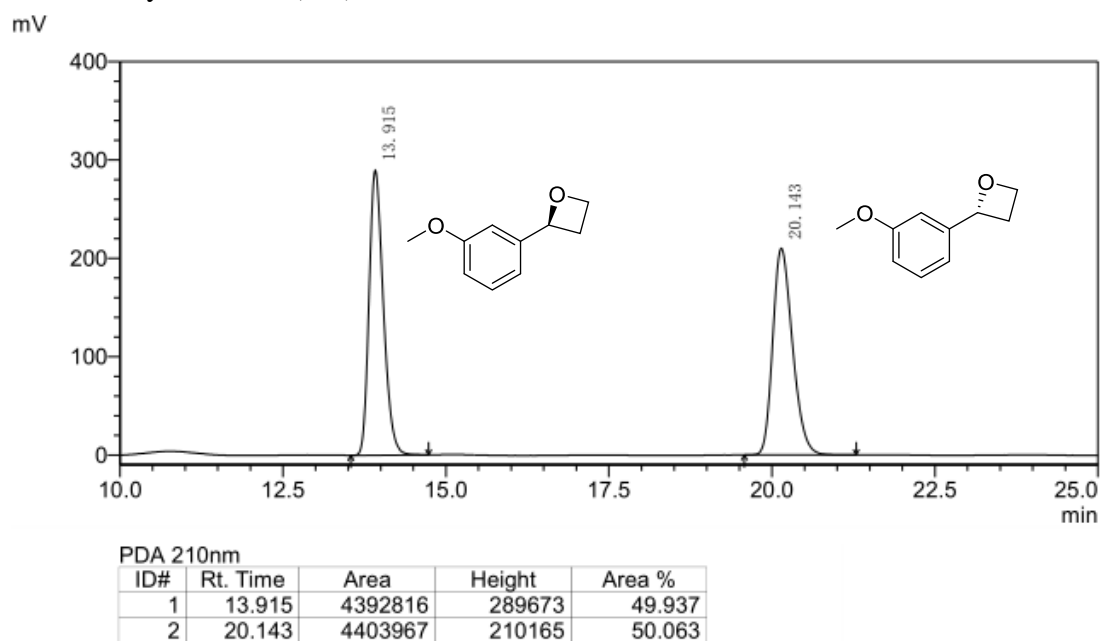

Enzymatic synthesized (*S*)-**10b**

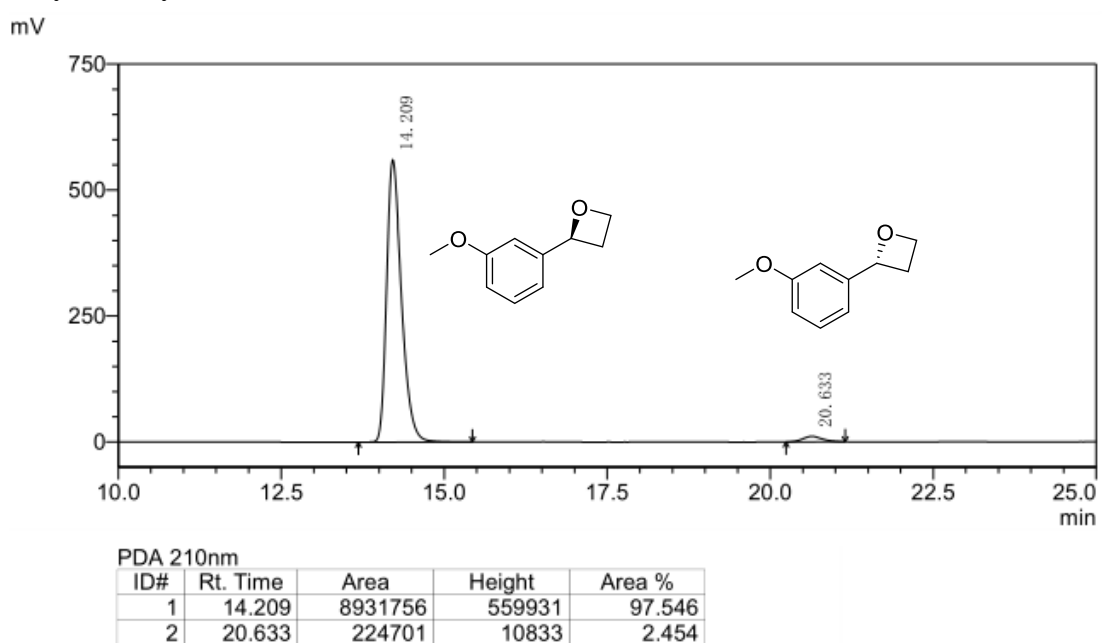

**Chiral HPLC analysis:** Diacel Chiralpak OX-3, *n*-hexane/*i*-PrOH = 97/3, flow rate 0.7 mL/min,  $\lambda$  = 210 nm,  $t_{(S)}$  = 14.2 min,  $t_{(R)}$  = 20.6 min.

Chemical synthesized (*rac*)-**11b**

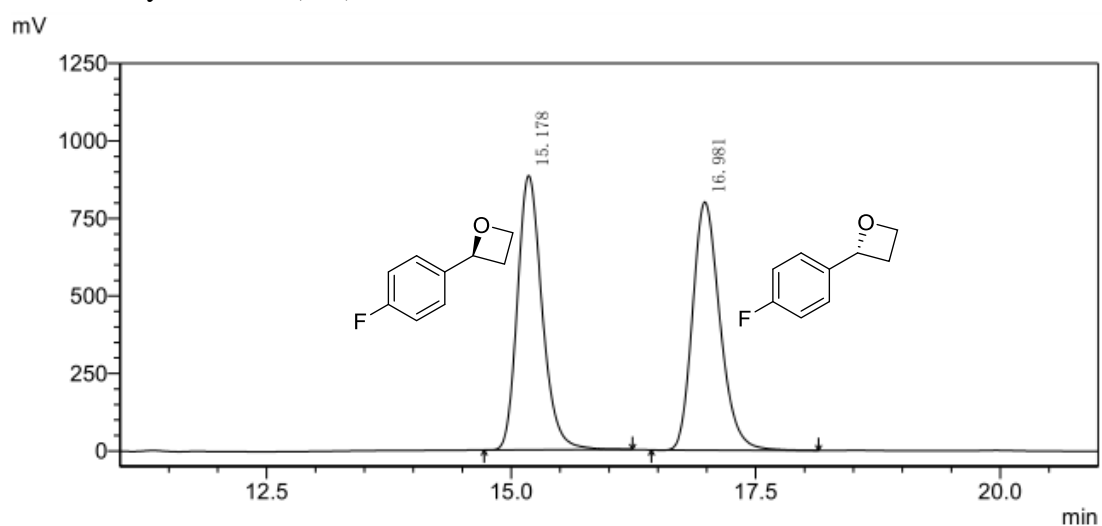

| PDA 210nm |          |          |        |        |
|-----------|----------|----------|--------|--------|
| ID#       | Rt. Time | Area     | Height | Area % |
| 1         | 15.178   | 15574056 | 884420 | 49.968 |
| 2         | 16.981   | 15594051 | 800141 | 50.032 |

Enzymatic synthesized (*S*)-**11b**

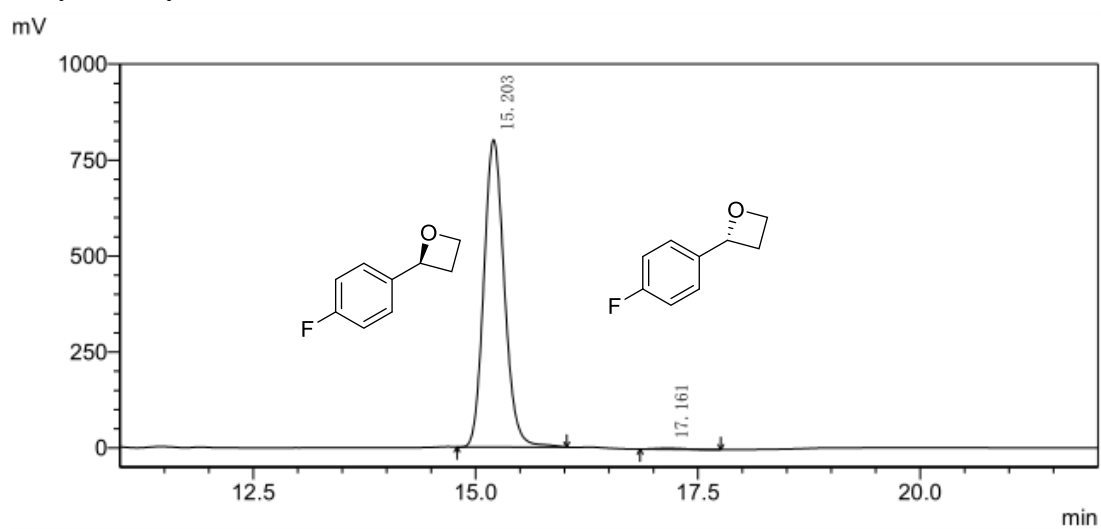

| PDA 210nm |          |          |        |        |
|-----------|----------|----------|--------|--------|
| ID#       | Rt. Time | Area     | Height | Area % |
| 1         | 15.203   | 12847589 | 800715 | 99.536 |
| 2         | 17.161   | 59830    | 2765   | 0.464  |

**Chiral HPLC analysis:** Diacel Chiralpak OX-3, *n*-hexane/*i*-PrOH = 99/1, flow rate 0.5 mL/min,  $\lambda$  = 210 nm,  $t_{(S)}$  = 15.2 min,  $t_{(R)}$  = 17.2 min.

### Chemical synthesized (*rac*)-**12b**

mV

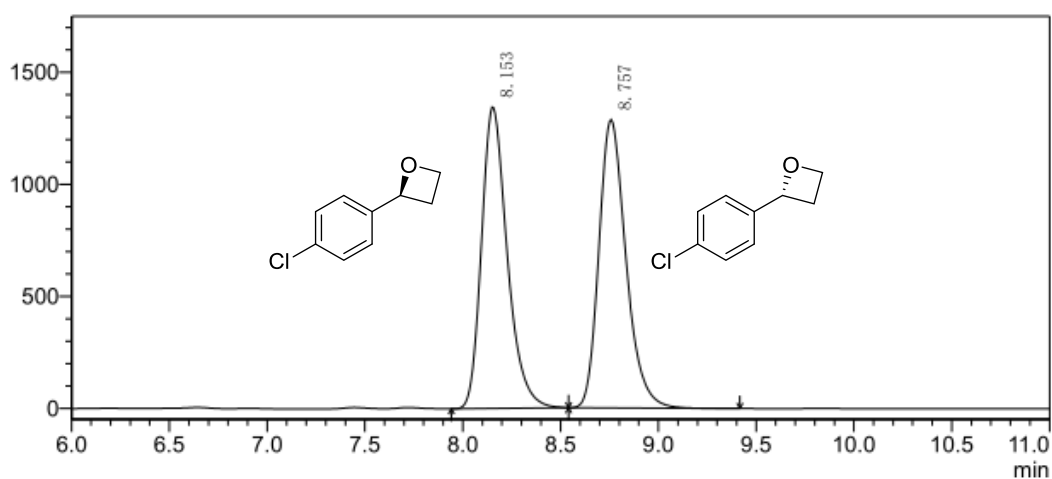

| PDA 210nm |          |          |         |        |
|-----------|----------|----------|---------|--------|
| ID#       | Rt. Time | Area     | Height  | Area % |
| 1         | 8.153    | 12371846 | 1346303 | 49.976 |
| 2         | 8.757    | 12383649 | 1287291 | 50.024 |

### Enzymatic synthesized (*S*)-**12b**

mV

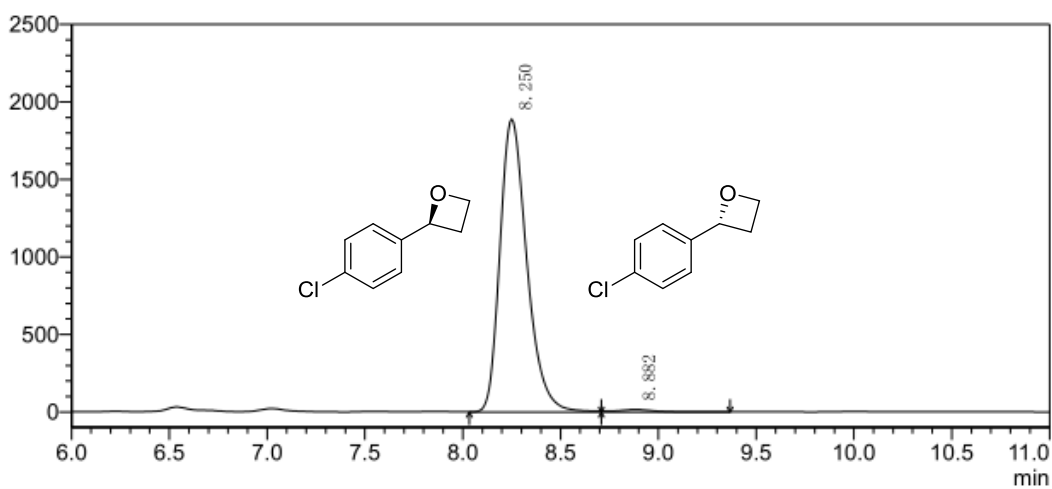

| PDA 210nm |          |          |         |        |
|-----------|----------|----------|---------|--------|
| ID#       | Rt. Time | Area     | Height  | Area % |
| 1         | 8.250    | 18068994 | 1890426 | 98.636 |
| 2         | 8.882    | 249906   | 16913   | 1.364  |

**Chiral HPLC analysis:** Diacel Chiralpak OX-3, *n*-hexane/*i*-PrOH = 97/3, flow rate 0.7 mL/min,  $\lambda$  = 210 nm,  $t_{(S)}$  = 8.3 min,  $t_{(R)}$  = 8.9 min.

Chemical synthesized (*rac*)-**13b**

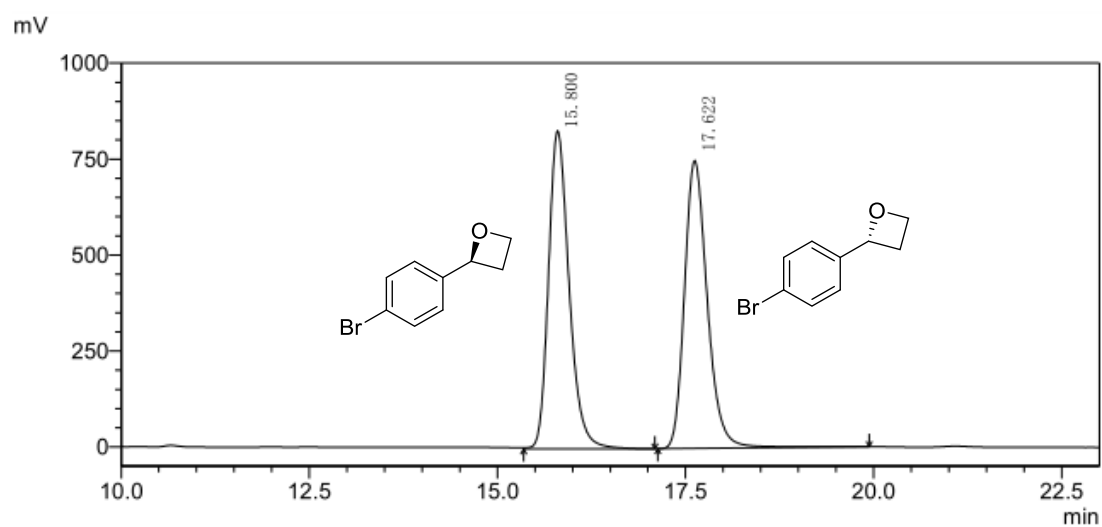

PDA 210nm

| ID# | Rt. Time | Area     | Height | Area % |
|-----|----------|----------|--------|--------|
| 1   | 15.800   | 15794861 | 828061 | 49.964 |
| 2   | 17.622   | 15817622 | 749364 | 50.036 |

Enzymatic synthesized (*S*)-**13b**

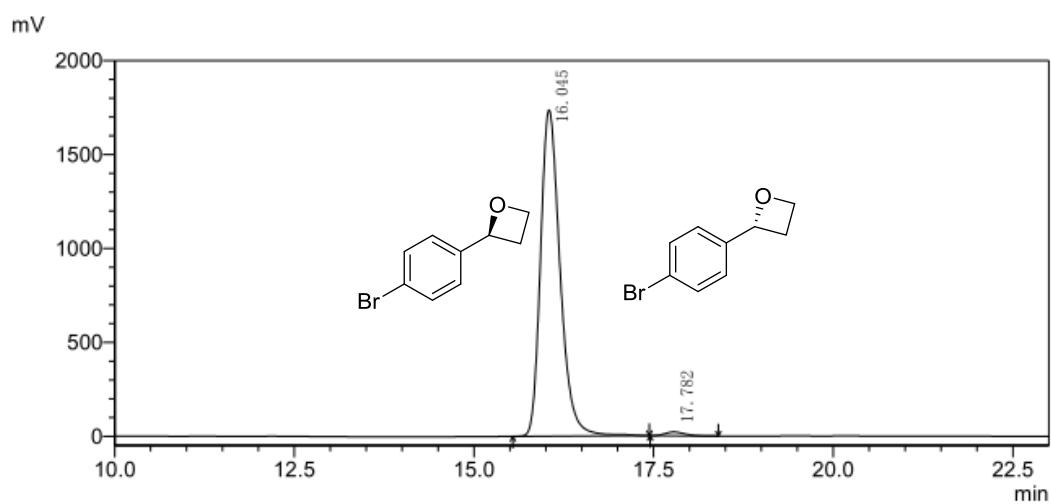

PDA 210nm

| ID# | Rt. Time | Area     | Height  | Area % |
|-----|----------|----------|---------|--------|
| 1   | 16.045   | 32895217 | 1737839 | 98.866 |
| 2   | 17.782   | 377243   | 19964   | 1.134  |

**Chiral HPLC analysis:** Diacel Chiralpak OX-3, *n*-hexane/*i*-PrOH = 99/1, flow rate 0.5 mL/min,  $\lambda$  = 210 nm,  $t_{(S)}$  = 16.0 min,  $t_{(R)}$  = 17.8 min.

Chemical synthesized (*rac*)-**14b**

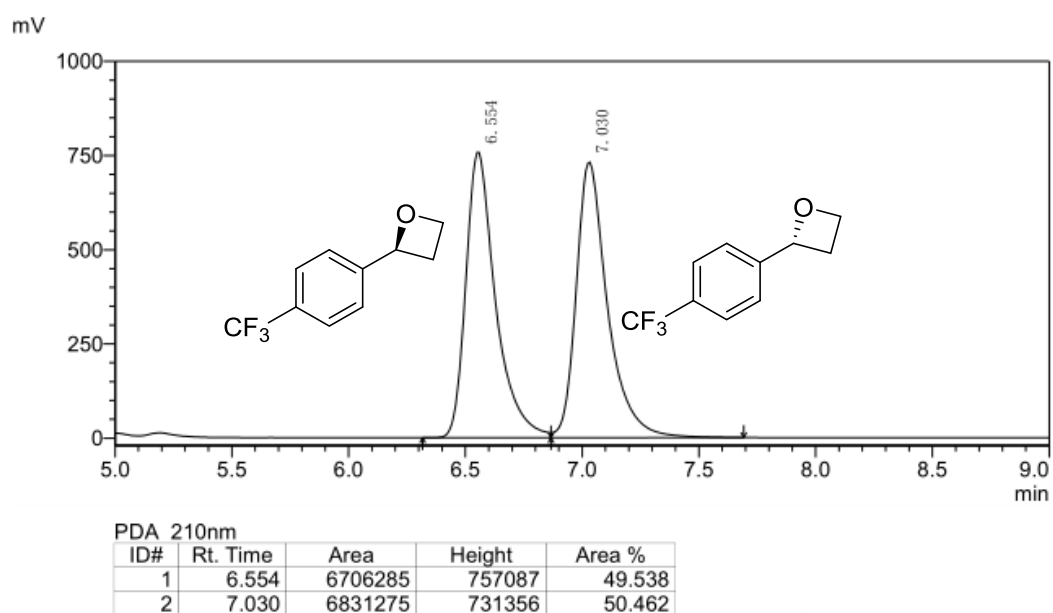

Enzymatic synthesized (*S*)-**14b**

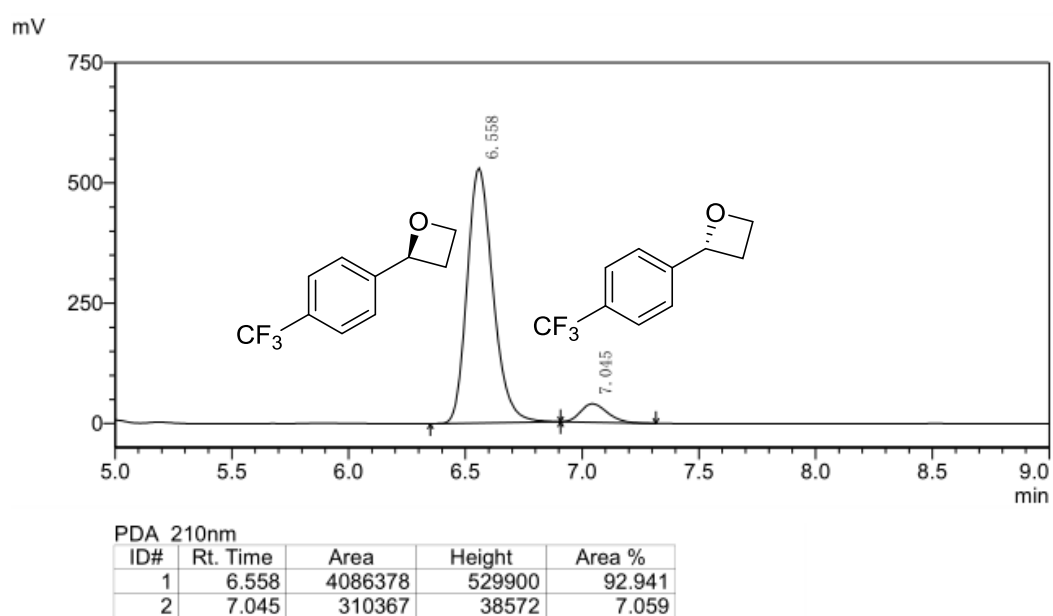

**Chiral HPLC analysis:** Diacel Chiralpak OX-3, *n*-hexane/*i*-PrOH = 97/3, flow rate 0.7 mL/min,  $\lambda$  = 210 nm,  $t_{(S)}$  = 6.6 min,  $t_{(R)}$  = 7.0 min.



Chemical synthesized (*rac*)-**15b**

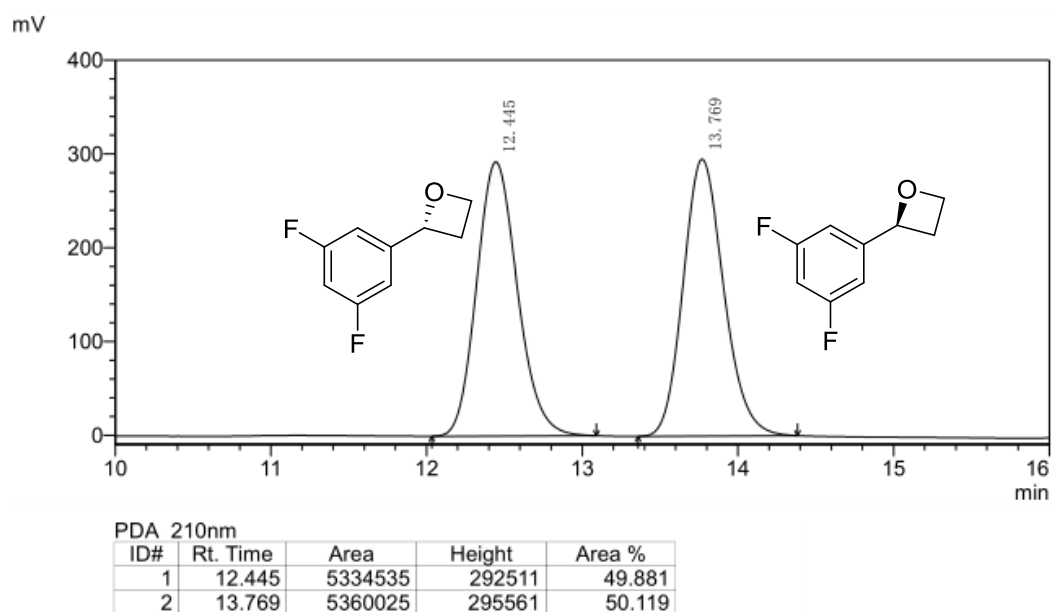

Enzymatic synthesized (*S*)-**15b**

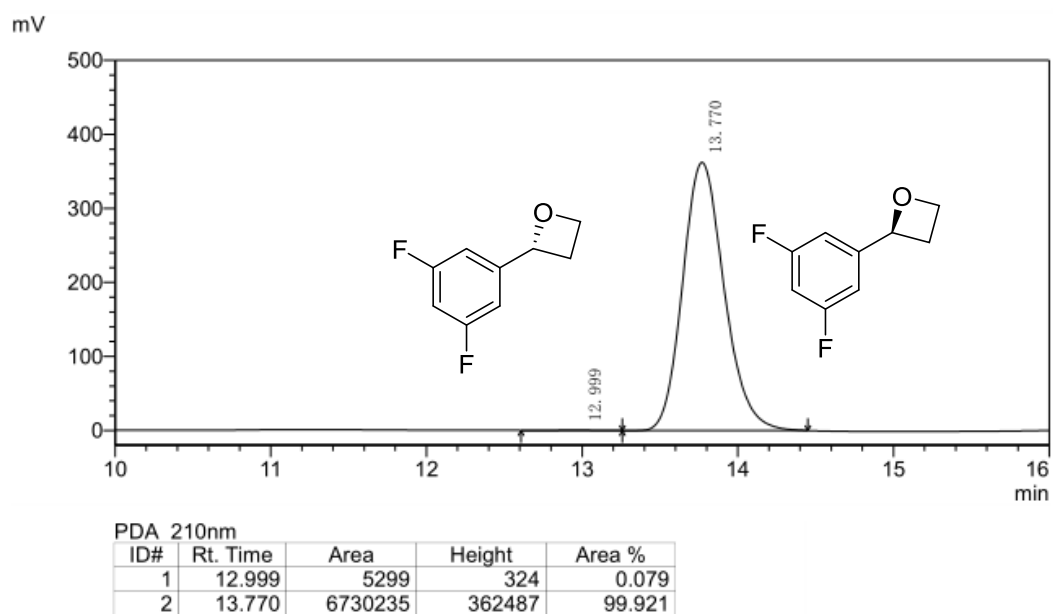

**Chiral HPLC analysis:** Diacel Chiralpak IA-3, *n*-hexane/*i*-PrOH = 99/1, flow rate 0.5 mL/min,  $\lambda$  = 210 nm,  $t_{(R)}$  = 13.0 min,  $t_{(S)}$  = 13.8 min.

Chemical synthesized (*rac*)-**16b**

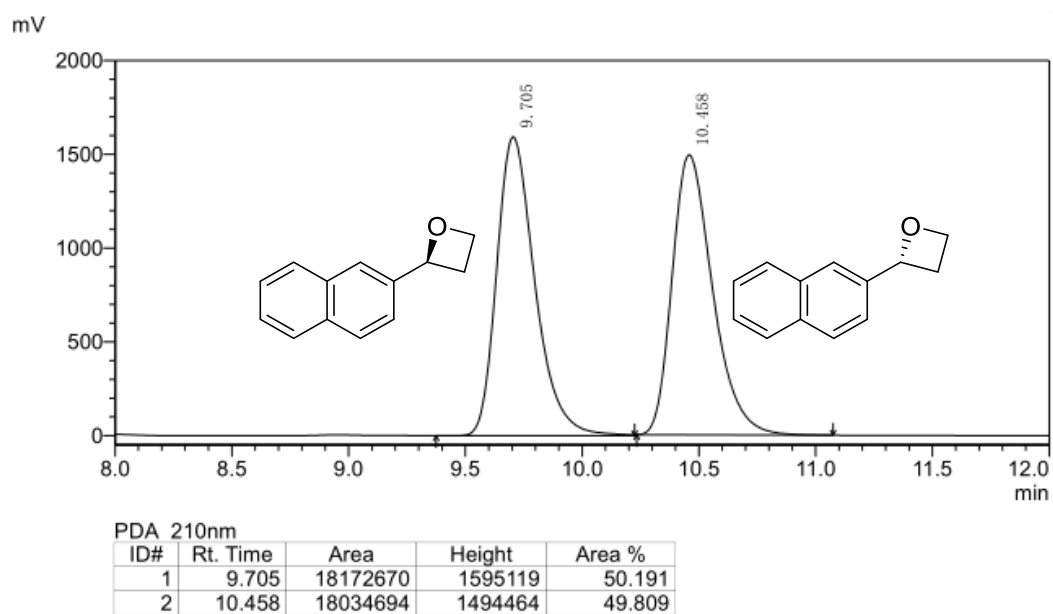

Enzymatic synthesized (*S*)-**16b**

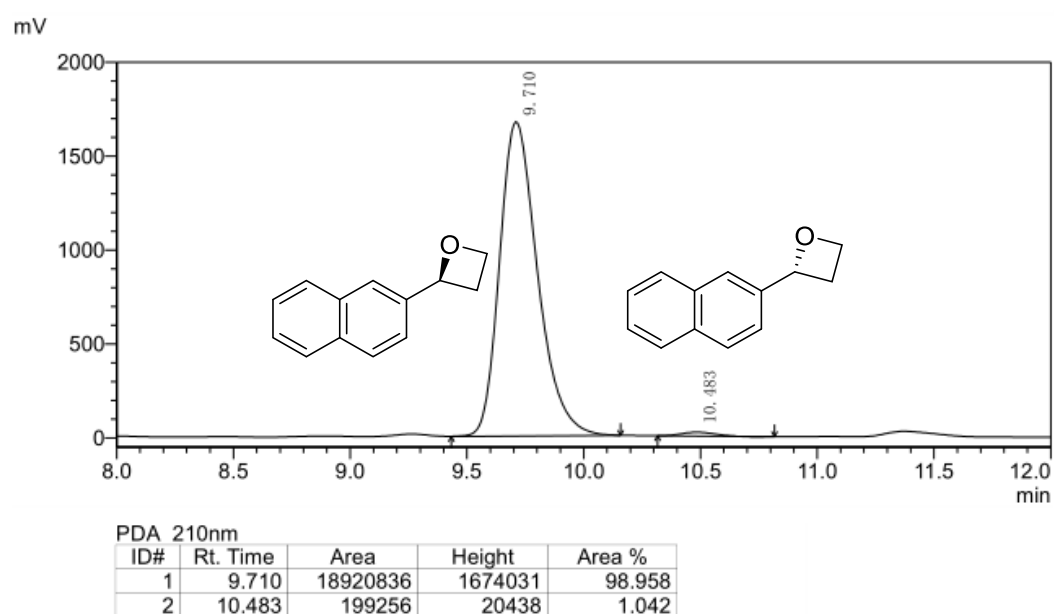

**Chiral HPLC analysis:** Diacel Chiralpak OX-3, *n*-hexane/*i*-PrOH = 97/3, flow rate 0.7 mL/min,  $\lambda$  = 210 nm,  $t_{(S)}$  = 9.7min,  $t_{(R)}$  = 10.5 min.

Chemical synthesized (*rac*)-**17b**

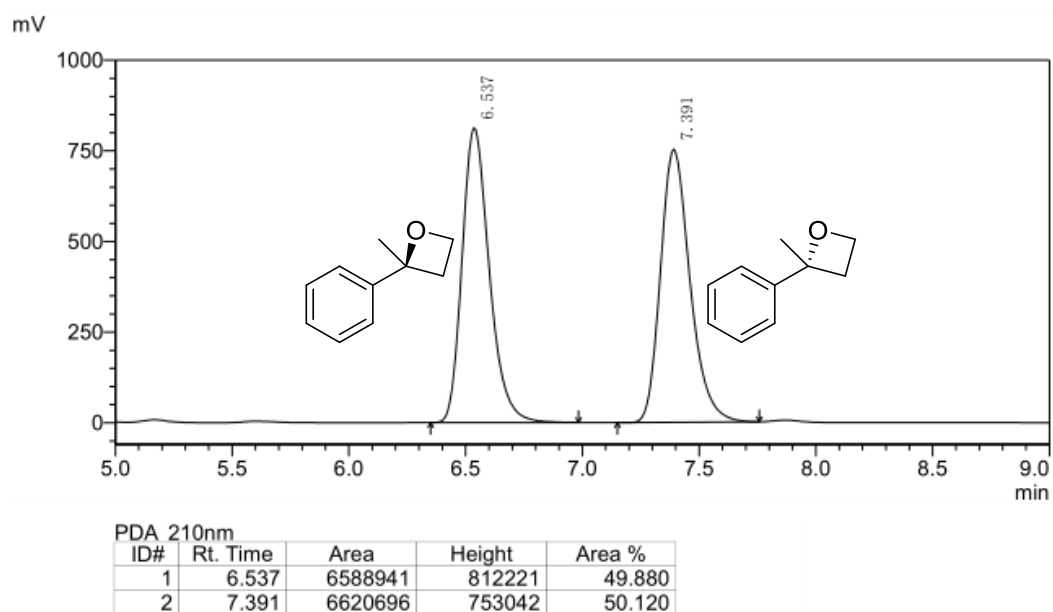

Enzymatic synthesized (*S*)-**17b**

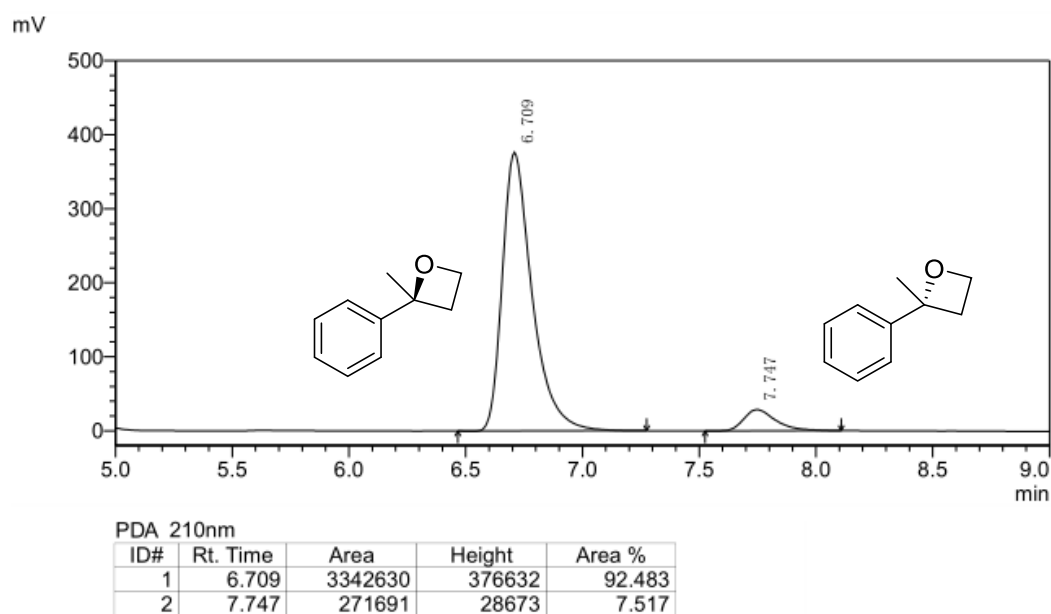

**Chiral HPLC analysis:** Diacel Chiralpak OX-3, *n*-hexane/*i*-PrOH = 97/3, flow rate 0.7 mL/min,  $\lambda$  = 210 nm,  $t_{(S)}$  = 6.7min,  $t_{(R)}$  = 7.7 min.

Chemical synthesized (*rac*)-**18b**

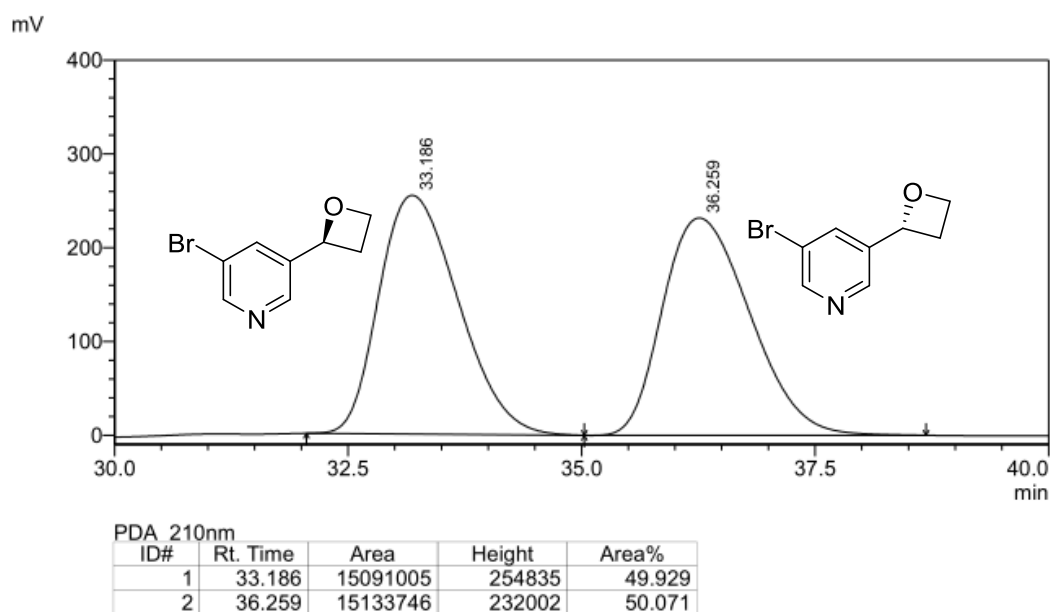

Enzymatic synthesized (*S*)-**18b**

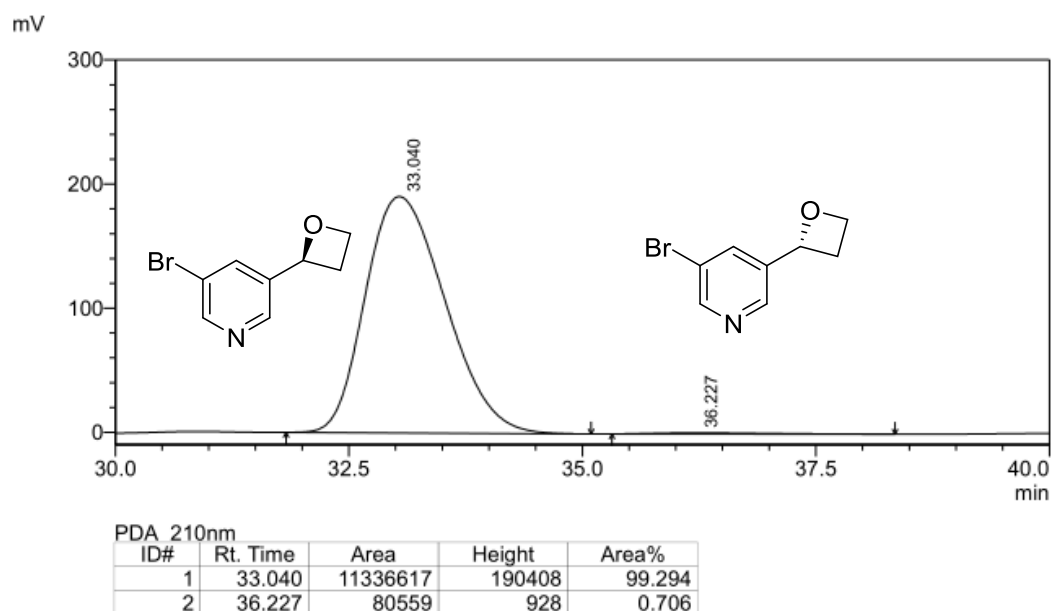

**Chiral HPLC analysis:** Diacel Chiralpak OB-H, *n*-hexane/*i*-PrOH = 99/1, flow rate 0.5 mL/min,  $\lambda$  = 210 nm,  $t_{(S)}$  = 33.0min,  $t_{(R)}$  = 36.2 min.

Chemical synthesized (*rac*)-**19b**

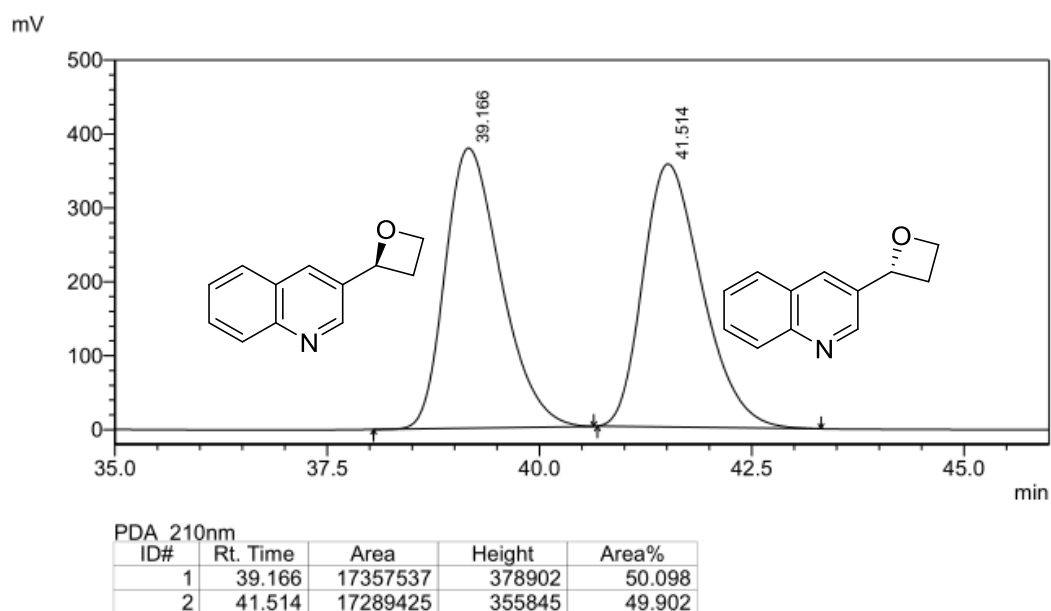

Enzymatic synthesized (*S*)-**19b**

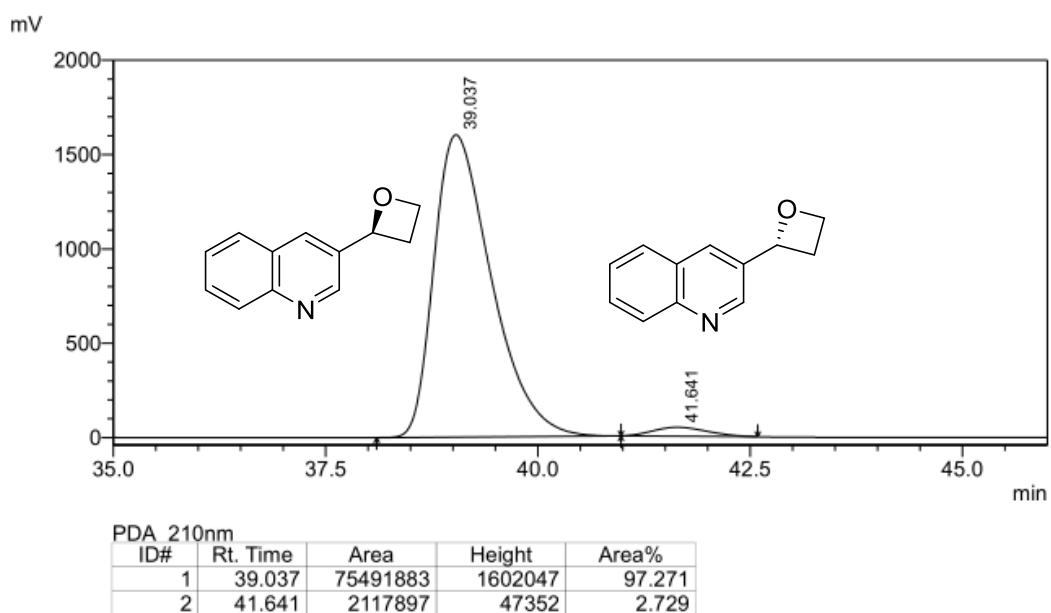

**Chiral HPLC analysis:** Diacel Chiralpak AD-H, *n*-hexane/*i*-PrOH = 95/5, flow rate 0.5 mL/min,  $\lambda$  = 210 nm,  $t_{(S)}$  = 39.0 min,  $t_{(R)}$  = 41.6 min.

Chemical synthesized (*rac*)-**21b**

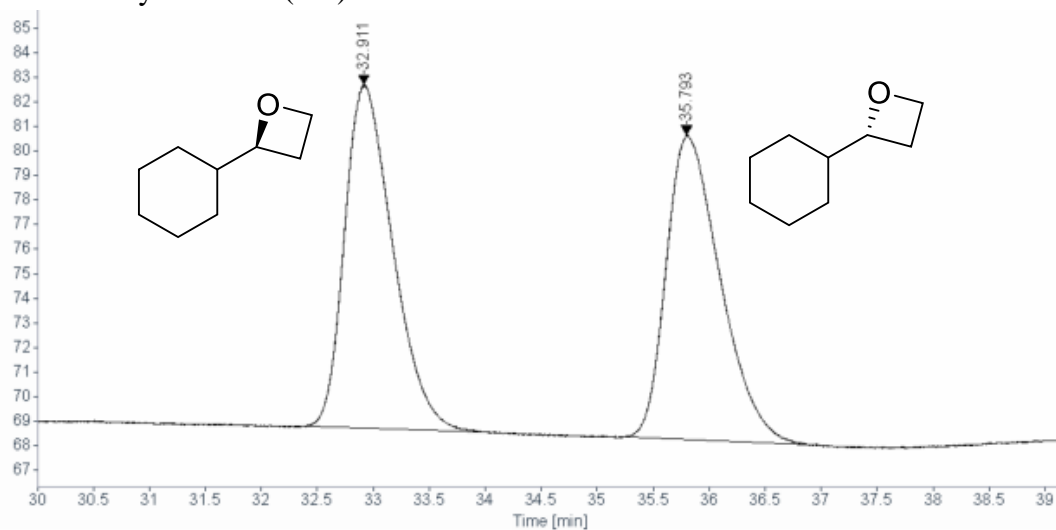

| ID# | Ret. Time | Area    | Height | Area%  | Resolution |
|-----|-----------|---------|--------|--------|------------|
| 1   | 32.911    | 420.903 | 14.020 | 50.148 |            |
| 1   | 35.793    | 418.413 | 12.422 | 49.852 | 3.468      |

Enzymatic synthesized (*S*)-**21b**

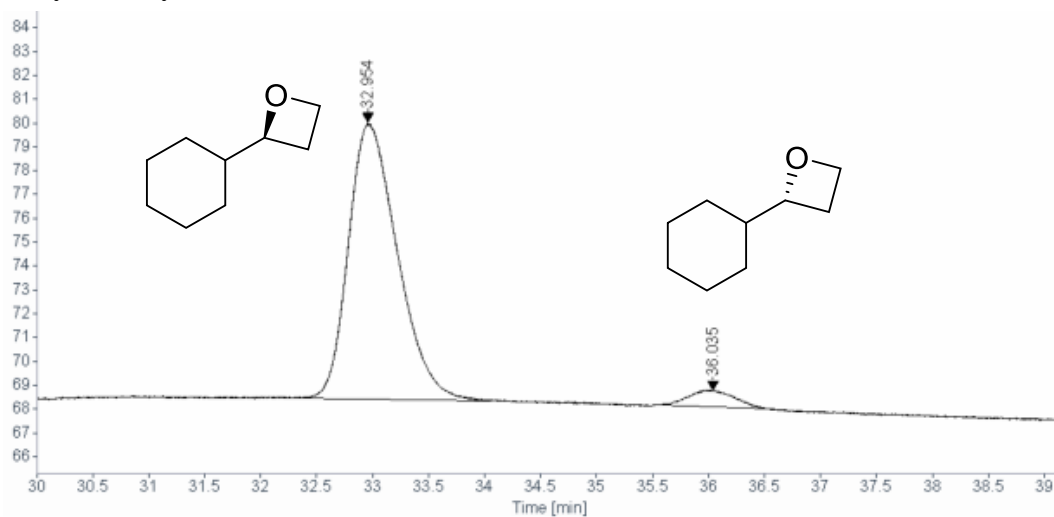

| ID# | Ret. Time | Area    | Height | Area%  | Resolution |
|-----|-----------|---------|--------|--------|------------|
| 1   | 32.954    | 353.312 | 11.617 | 94.490 |            |
| 1   | 36.035    | 20.602  | 0.709  | 5.510  | 3.879      |

**Chiral GC analysis:** Rt-bDEXcst (RESTEK), 80°C for 45 min,  $t_{(S)} = 33.0$  min,  $t_{(R)} = 36.0$  min.

Chemical synthesized (*rac*)-**1c**

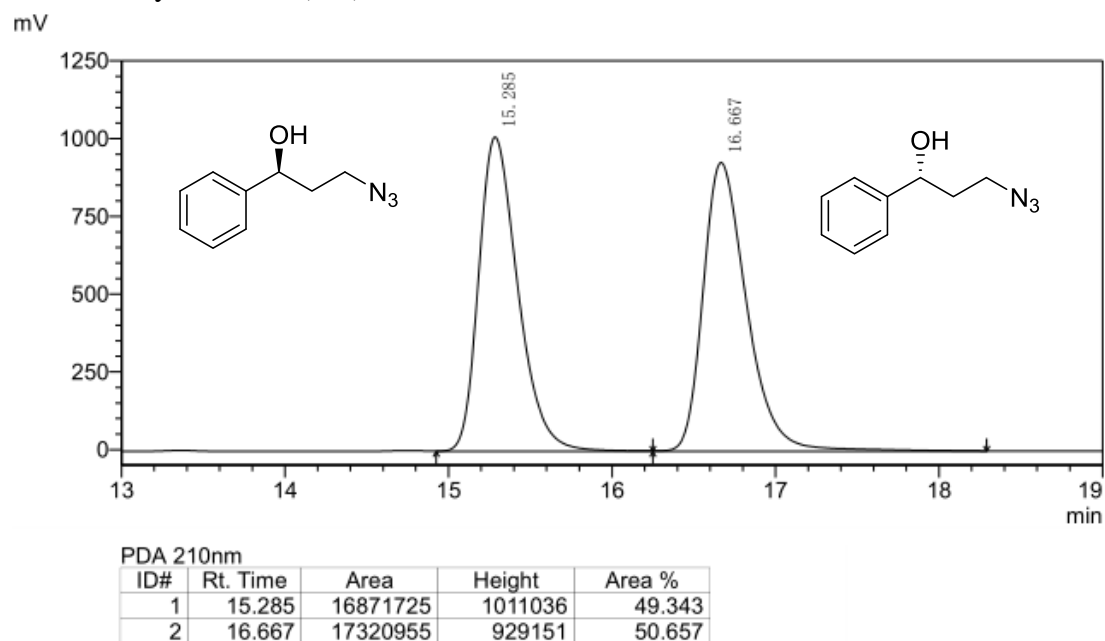

Enzymatic synthesized (*R*)-**1c**

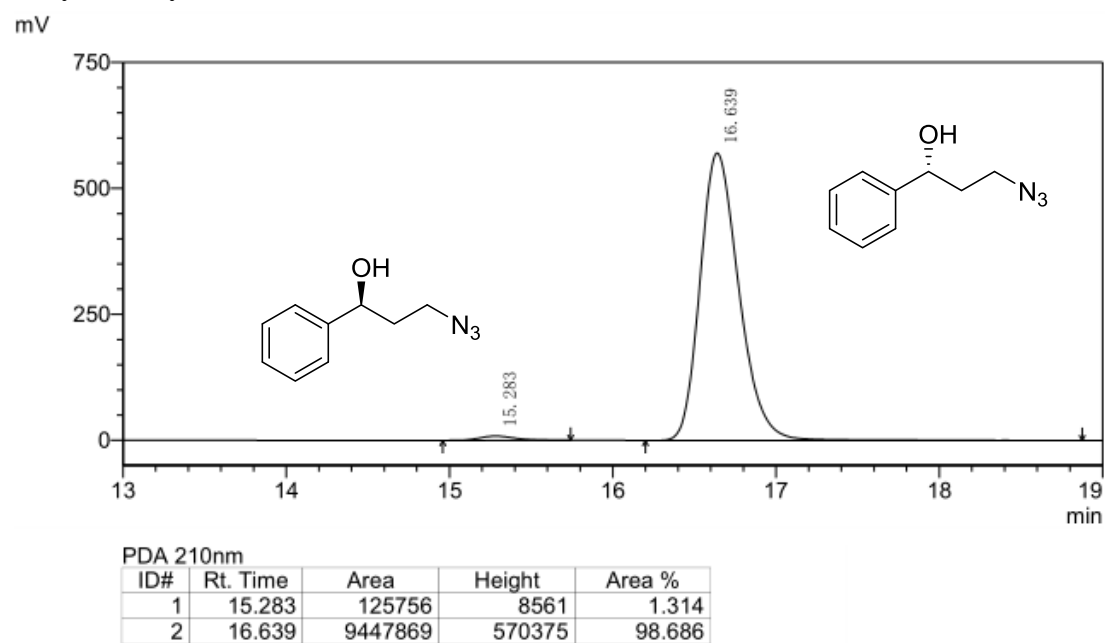

**Chiral HPLC analysis:** Diacel Chiralpak OX-3, *n*-hexane/*i*-PrOH = 97/3, flow rate 0.7 mL/min,  $\lambda$  = 210 nm,  $t_{(S)}$  = 15.3 min,  $t_{(R)}$  = 16.6 min.

Chemical synthesized (*rac*)-**2c**

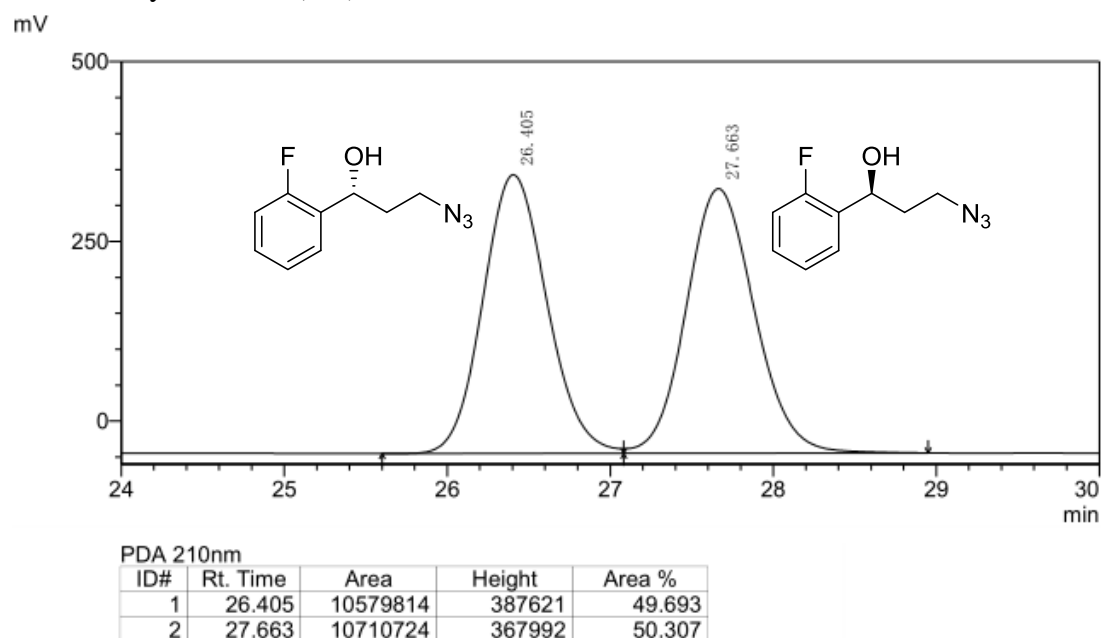

Enzymatic synthesized (*R*)-**2c**

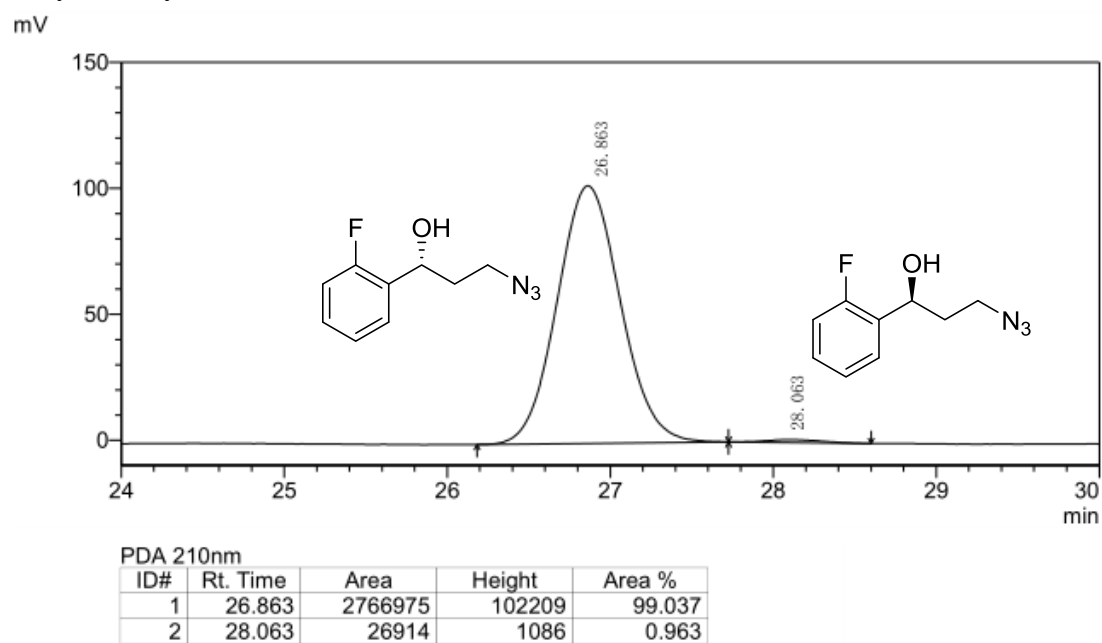

**Chiral HPLC analysis:** Diacel Chiralpak IH, *n*-hexane/*i*-PrOH = 97/3, flow rate 0.5 mL/min,  $\lambda$  = 210 nm,  $t_{(R)}$  = 26.9 min,  $t_{(S)}$  = 28.1 min.



Chemical synthesized (*rac*)-**3c**

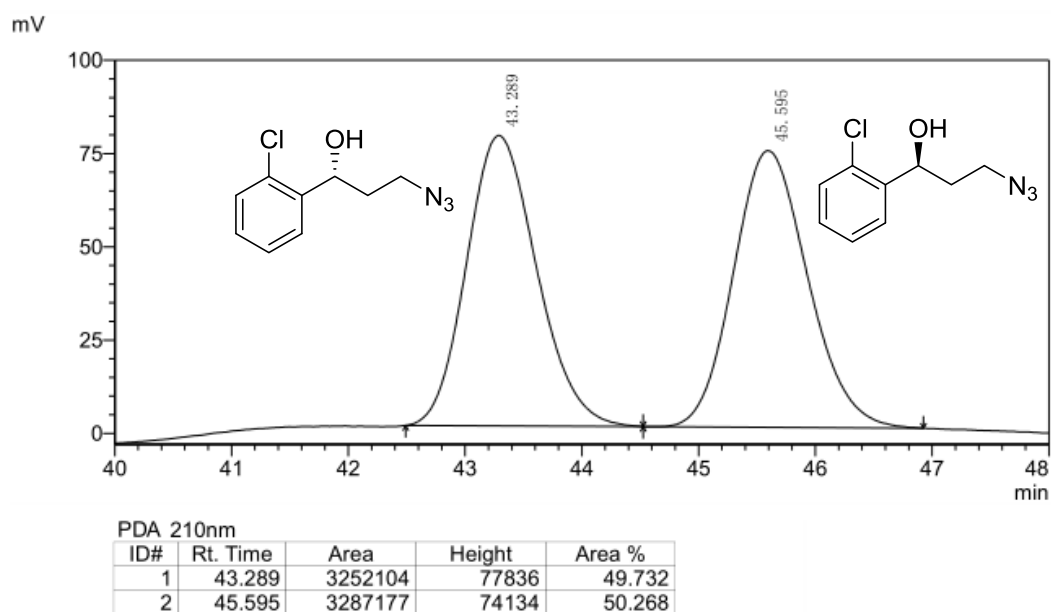

Enzymatic synthesized (*R*)-**3c**

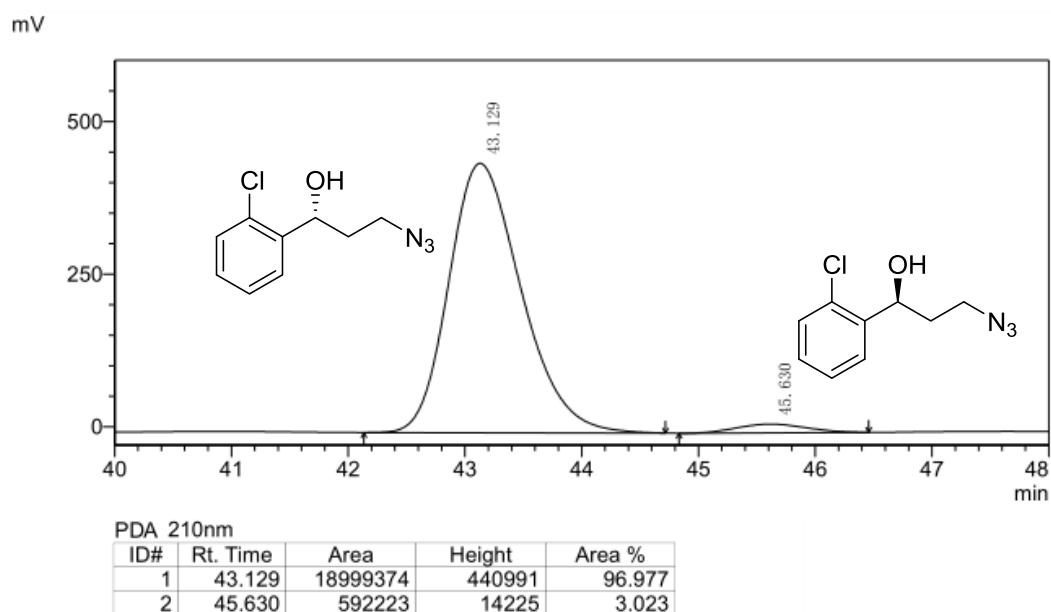

**Chiral HPLC analysis:** Diacel Chiralpak OX-3, *n*-hexane/*i*-PrOH = 99/1, flow rate 0.5 mL/min,  $\lambda$  = 210 nm,  $t_{(R)}$  = 43.1 min,  $t_{(S)}$  = 45.6 min.

Chemical synthesized (*rac*)-**4c**

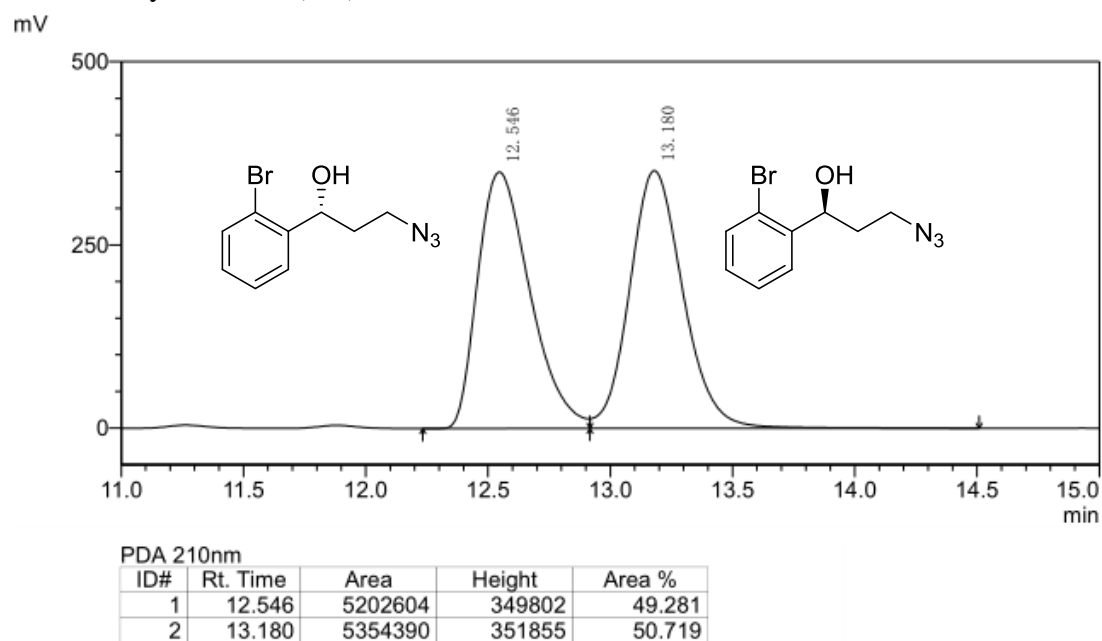

Enzymatic synthesized (*R*)-**4c**

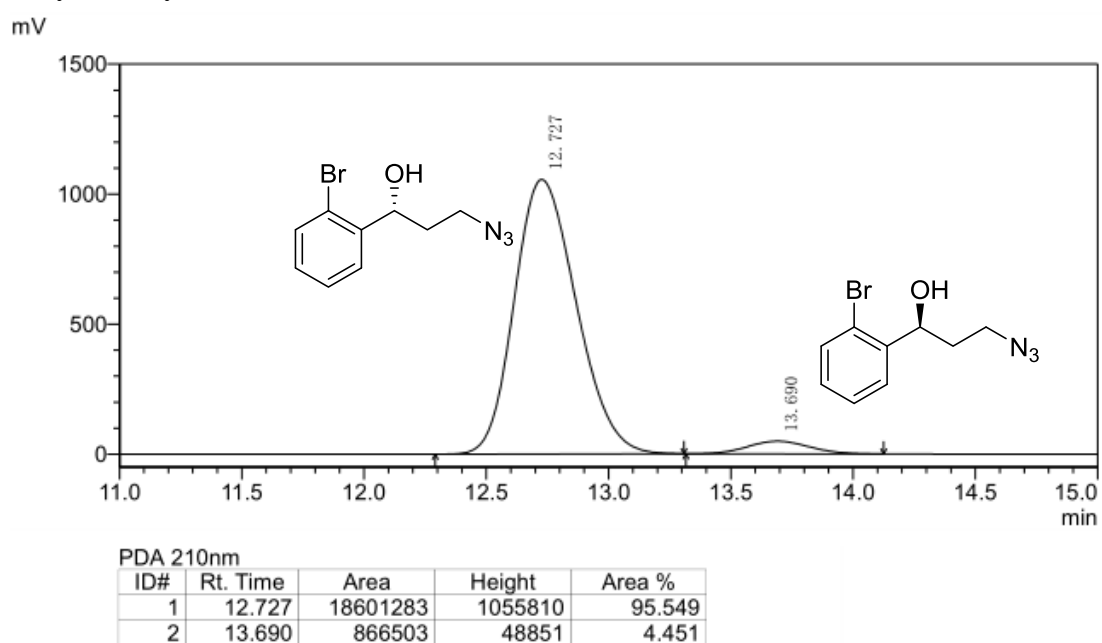

**Chiral HPLC analysis:** Diacel Chiralpak OX-3, *n*-hexane/*i*-PrOH = 97/3, flow rate 0.7 mL/min,  $\lambda$  = 210 nm,  $t_{(R)}$  = 12.7 min,  $t_{(S)}$  = 13.7 min.

Chemical synthesized (*rac*)-**5c**

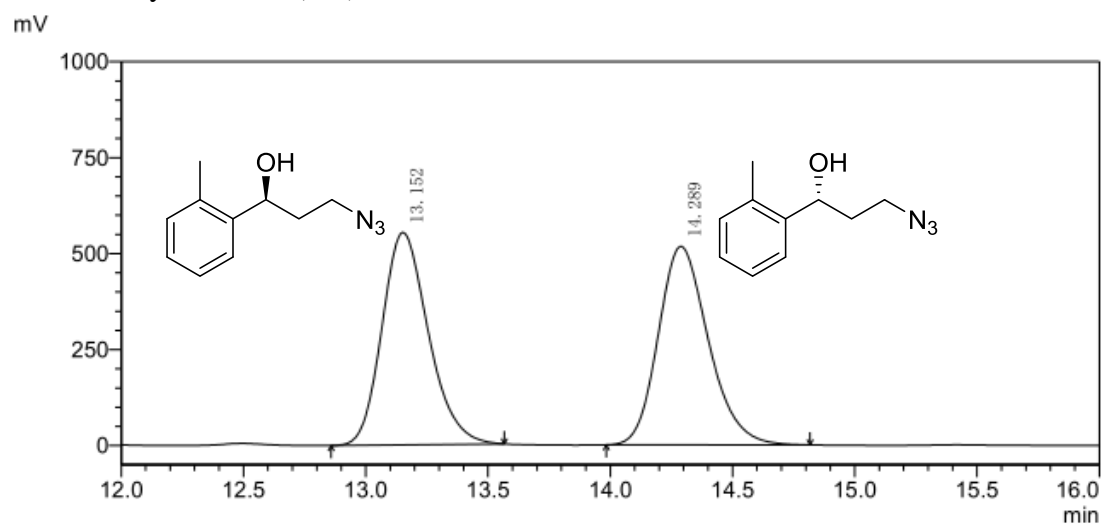

| PDA 210nm |          |         |        |        |
|-----------|----------|---------|--------|--------|
| ID#       | Rt. Time | Area    | Height | Area % |
| 1         | 13.152   | 7305302 | 553682 | 49.752 |
| 2         | 14.289   | 7378269 | 517180 | 50.248 |

Enzymatic synthesized (*R*)-**5c**

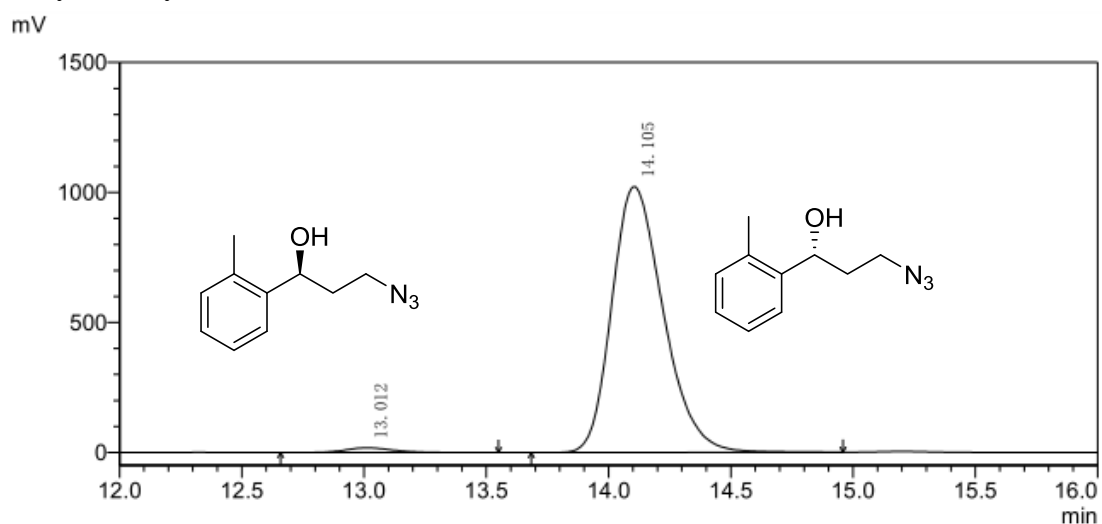

| PDA 210nm |          |          |         |        |
|-----------|----------|----------|---------|--------|
| ID#       | Rt. Time | Area     | Height  | Area % |
| 1         | 13.012   | 243869   | 18328   | 1.601  |
| 2         | 14.105   | 14986855 | 1021777 | 98.399 |

**Chiral HPLC analysis:** Diacel Chiralpak OX-3, *n*-hexane/*i*-PrOH = 97/3, flow rate 0.7 mL/min,  $\lambda$  = 210 nm,  $t_{(S)}$  = 13.0 min,  $t_{(R)}$  = 14.1 min.

Chemical synthesized (*rac*)-**6c**

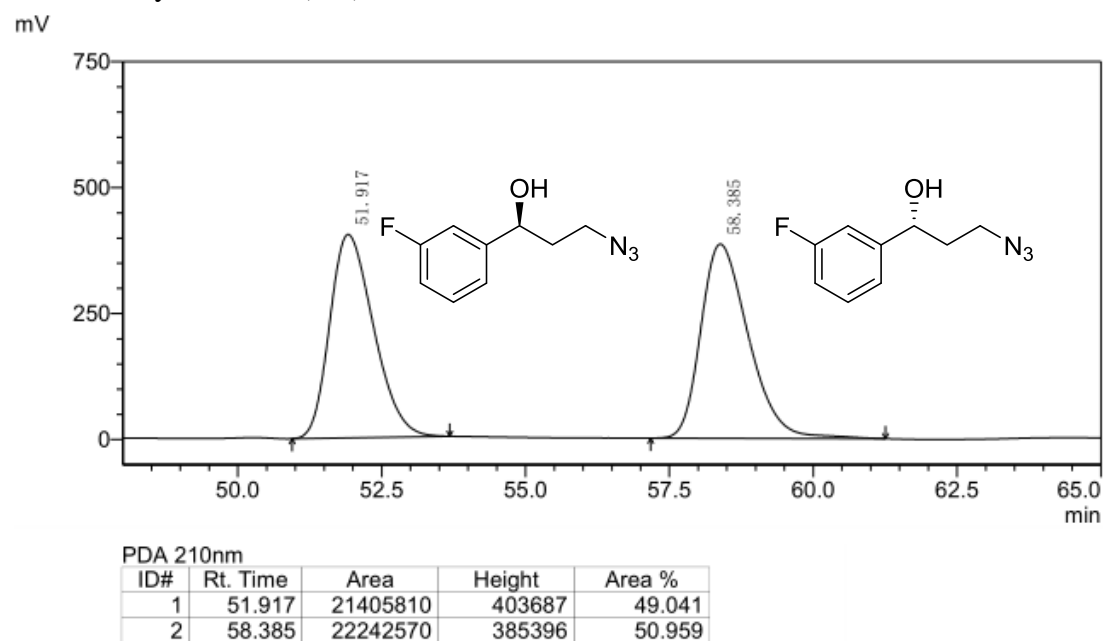

Enzymatic synthesized (*R*)-**6c**

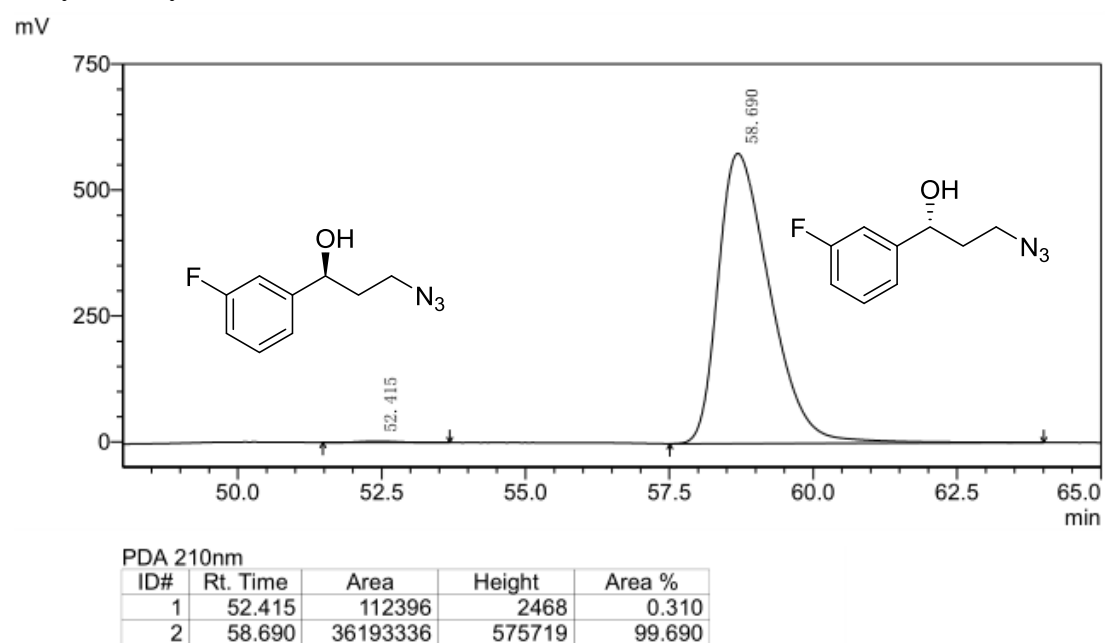

**Chiral HPLC analysis:** Diacel Chiralpak OX-3, *n*-hexane/*i*-PrOH = 99/1, flow rate 0.5 mL/min,  $\lambda$  = 210 nm,  $t_{(S)}$  = 52.4 min,  $t_{(R)}$  = 58.7 min.

Chemical synthesized (*rac*)-**7c**

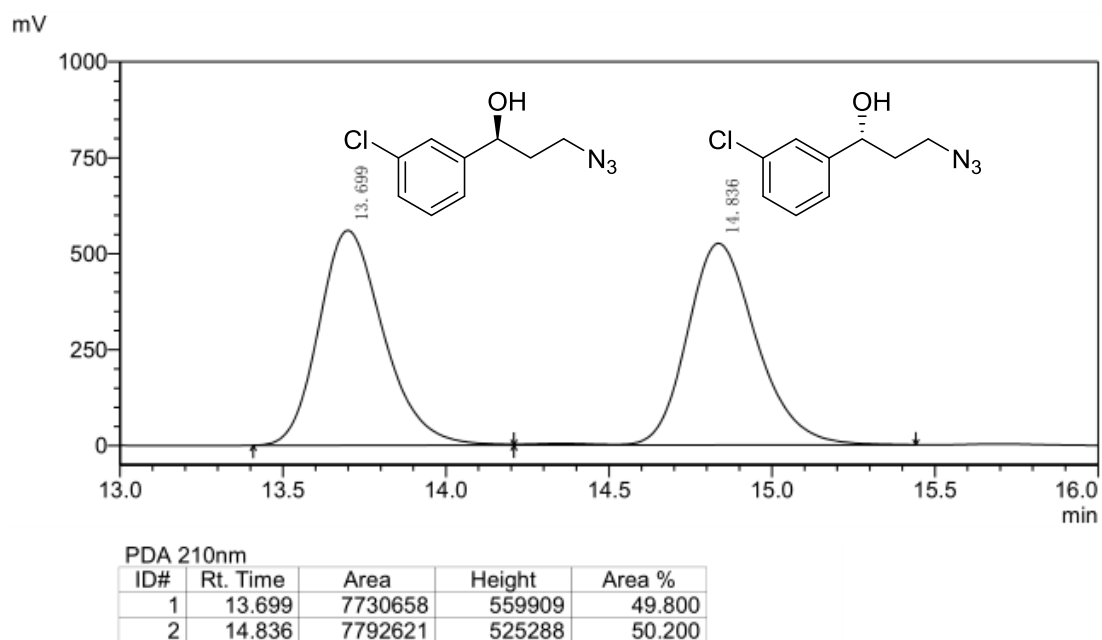

Enzymatic synthesized (*R*)-**7c**

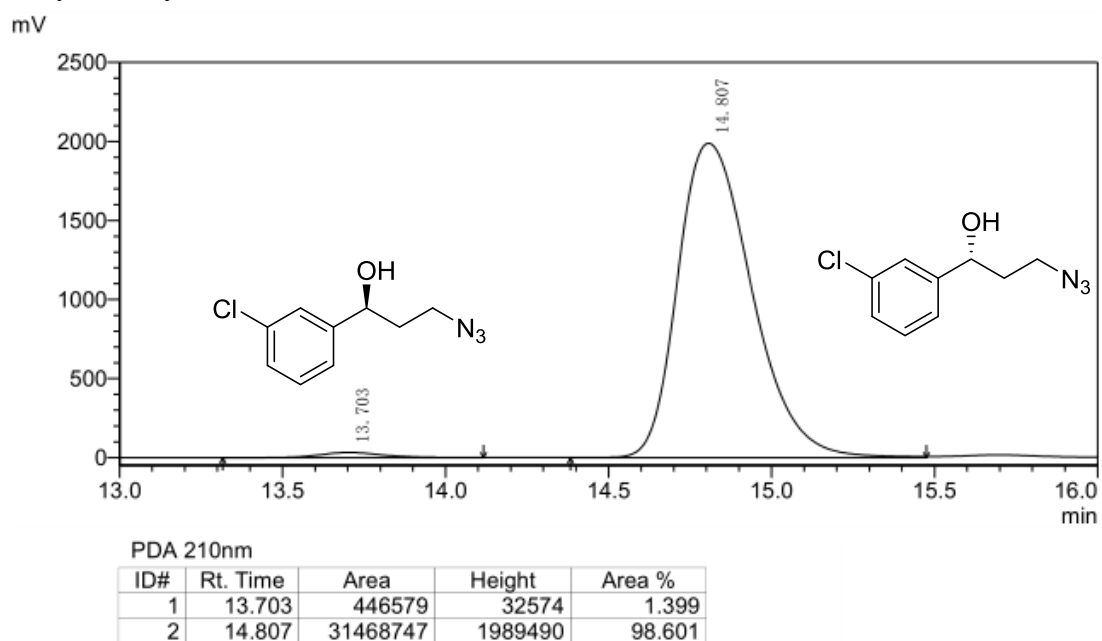

**Chiral HPLC analysis:** Diacel Chiralpak OX-3, *n*-hexane/*i*-PrOH = 97/3, flow rate 0.7 mL/min,  $\lambda$  = 210 nm,  $t_{(S)}$  = 13.7 min,  $t_{(R)}$  = 14.8 min.

Chemical synthesized (*rac*)-**8c**

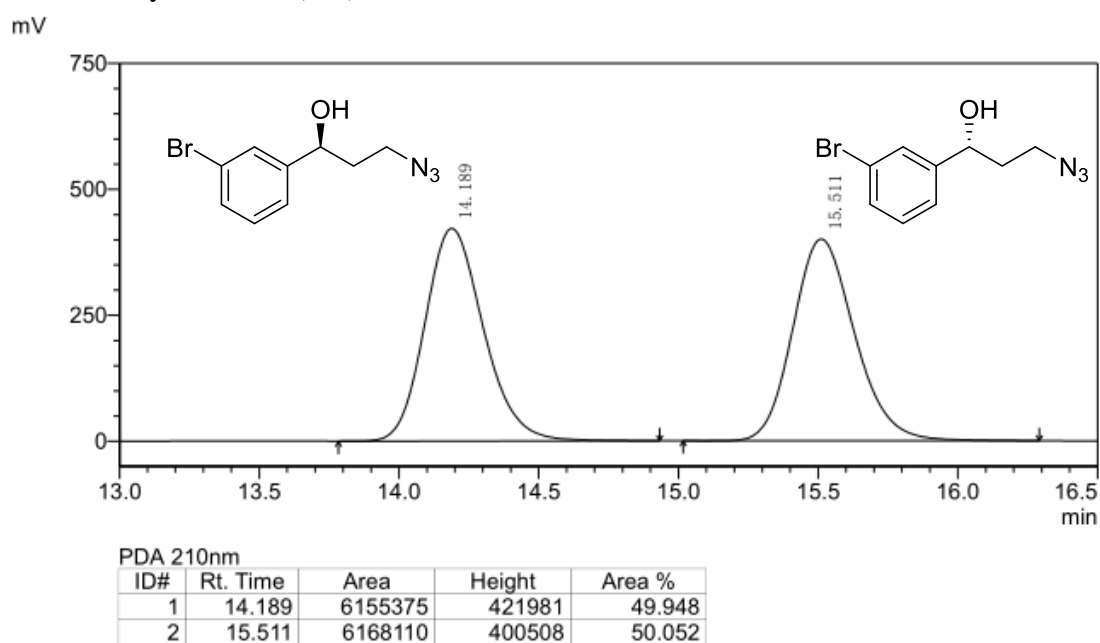

Enzymatic synthesized (*R*)-**8c**

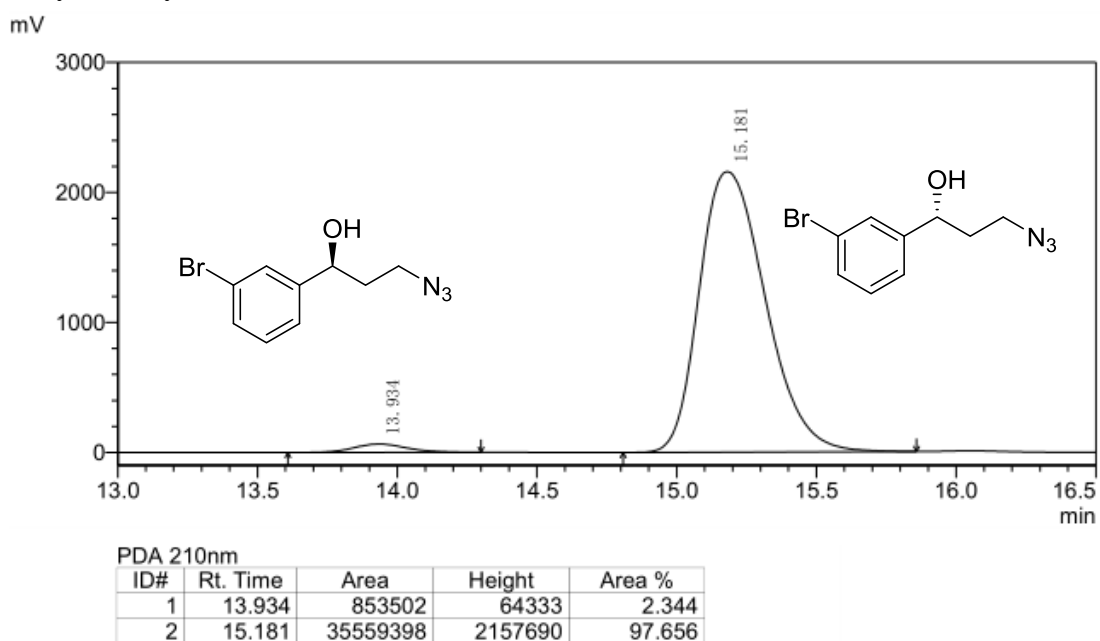

**Chiral HPLC analysis:** Diacel Chiralpak OX-3, *n*-hexane/*i*-PrOH = 97/3, flow rate 0.7 mL/min,  $\lambda$  = 210 nm,  $t_{(S)}$  = 13.9 min,  $t_{(R)}$  = 15.2 min.

Chemical synthesized (*rac*)-**9c**

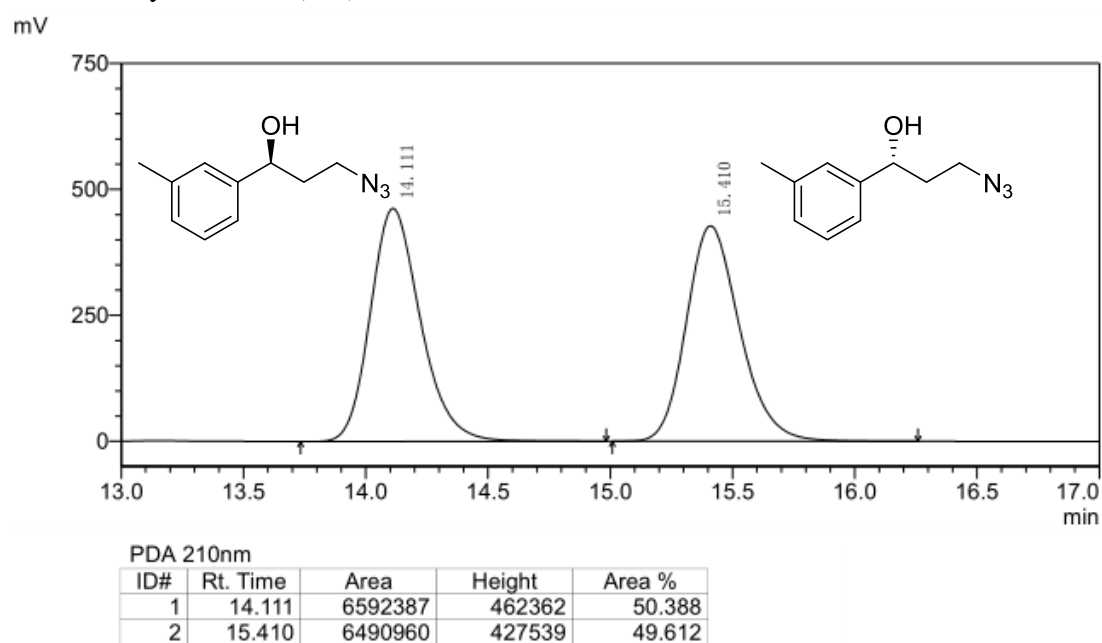

Enzymatic synthesized (*R*)-**9c**

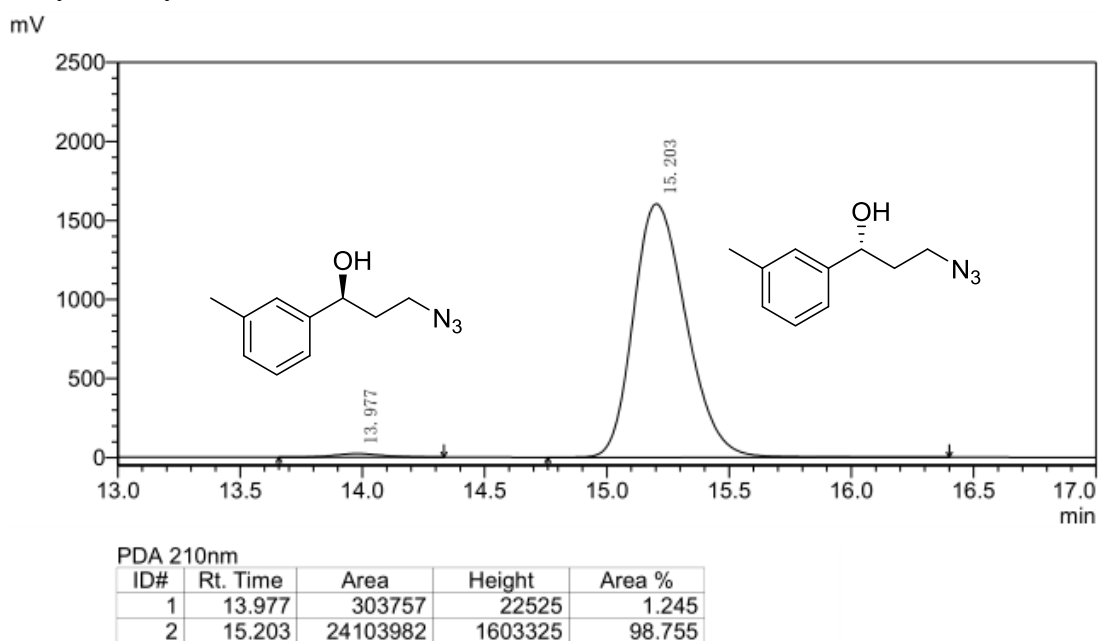

**Chiral HPLC analysis:** Diacel Chiralpak OX-3, *n*-hexane/*i*-PrOH = 97/3, flow rate 0.7 mL/min,  $\lambda$  = 210 nm,  $t_{(S)}$  = 14.0 min,  $t_{(R)}$  = 15.2 min.

Chemical synthesized (*rac*)-**10c**

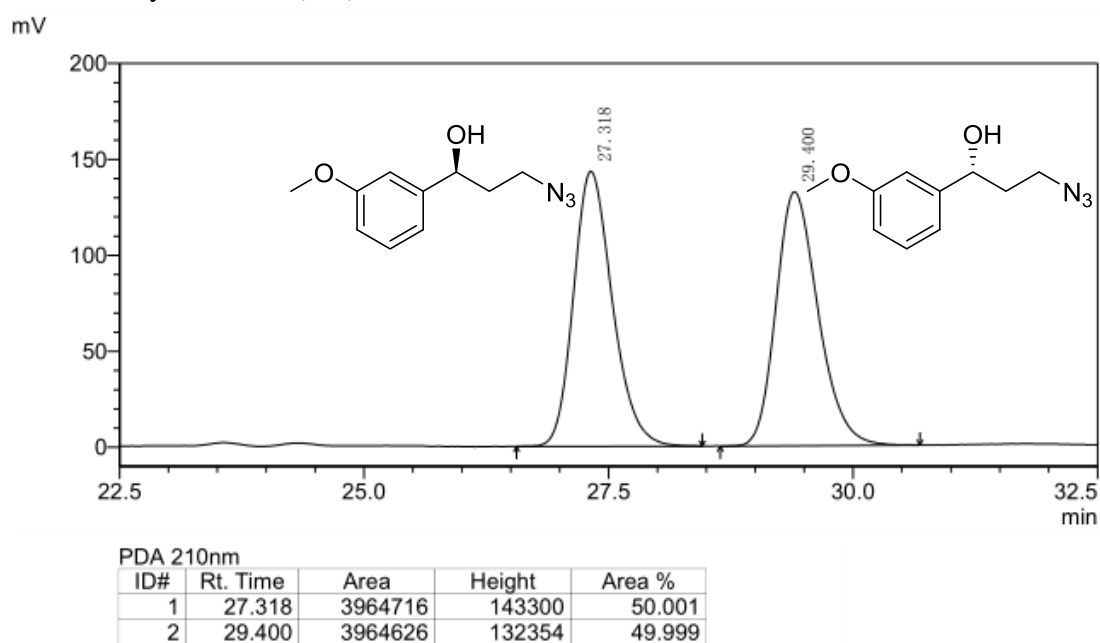

Enzymatic synthesized (*R*)-**10c**

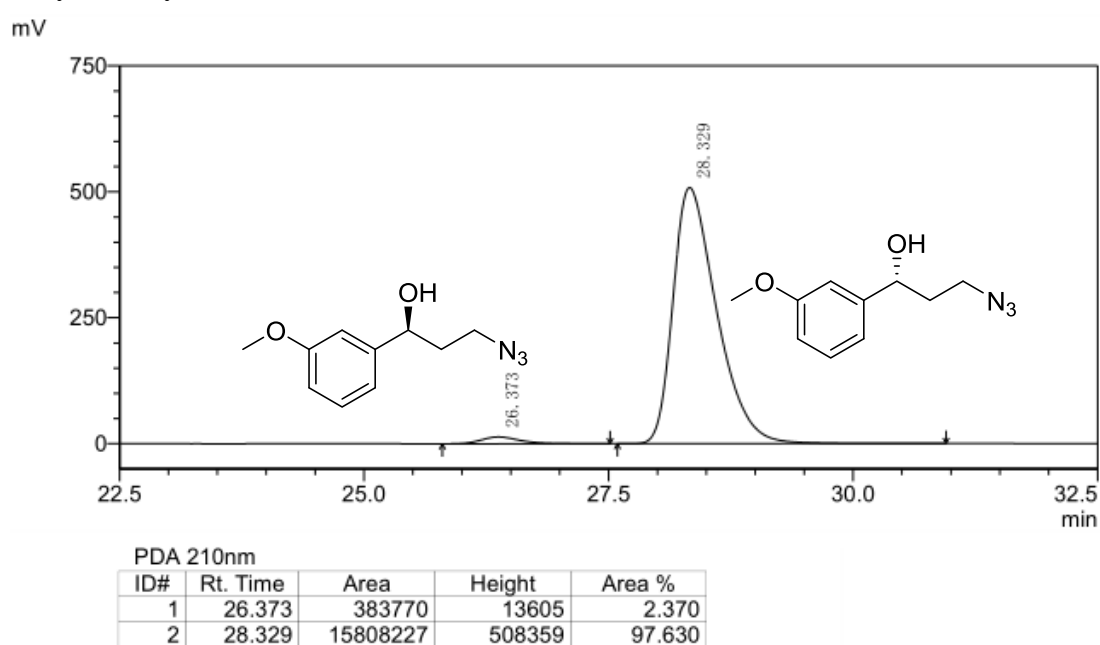

**Chiral HPLC analysis:** Diacel Chiralpak OX-3, *n*-hexane/*i*-PrOH = 97/3, flow rate 0.7 mL/min,  $\lambda$  = 210 nm,  $t_{(S)}$  = 26.4 min,  $t_{(R)}$  = 28.3 min.



Chemical synthesized (*rac*)-**11c**

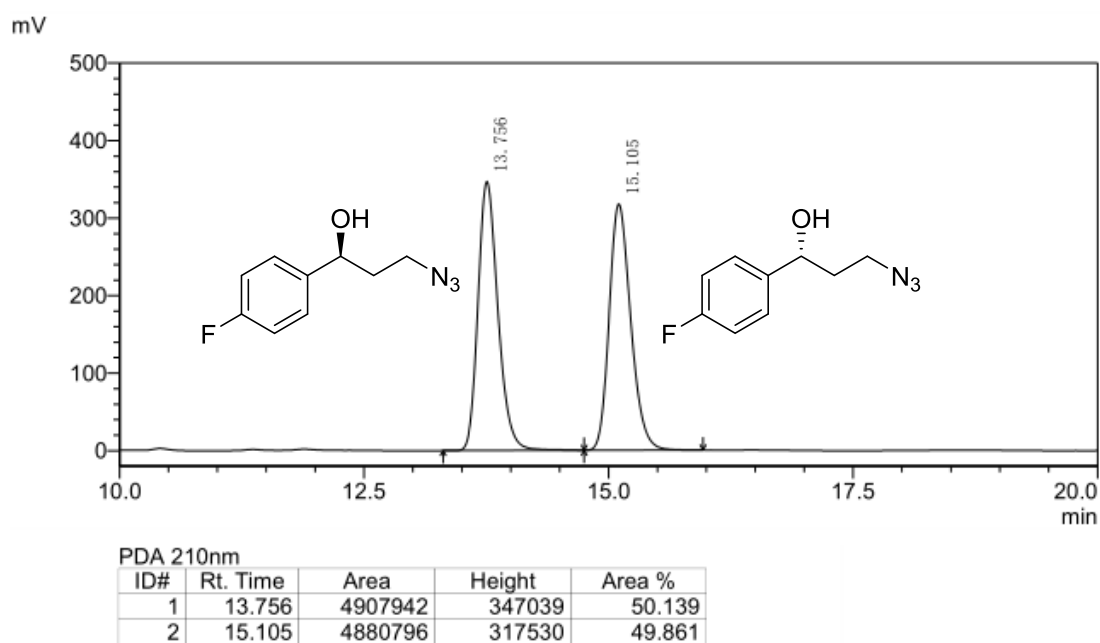

Enzymatic synthesized (*R*)-**11c**

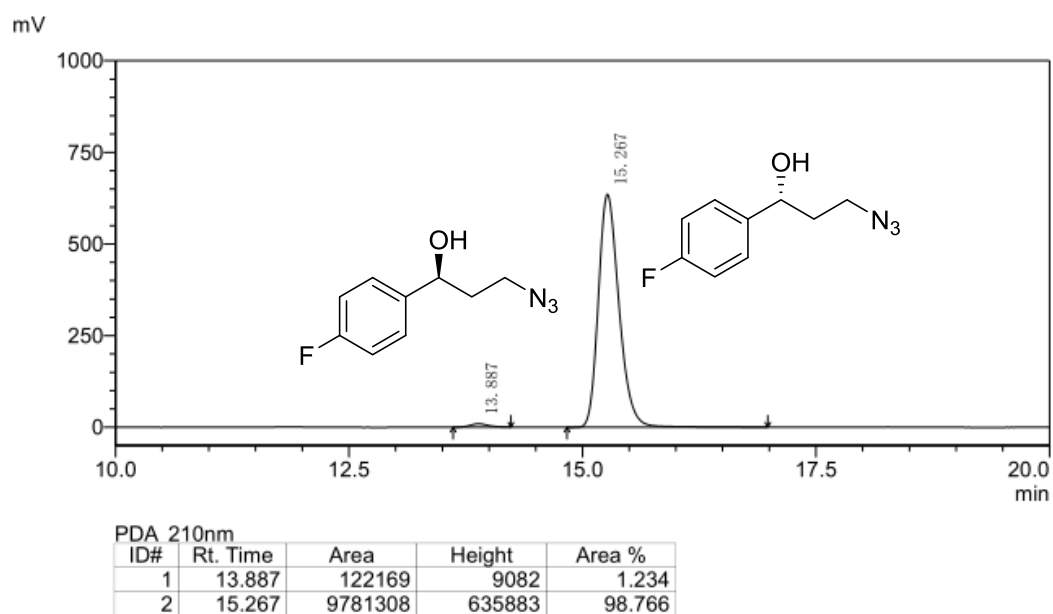

**Chiral HPLC analysis:** Diacel Chiralpak OX-3, *n*-hexane/*i*-PrOH = 97/3, flow rate 0.7 mL/min,  $\lambda$  = 210 nm,  $t_{(S)}$  = 13.9 min,  $t_{(R)}$  = 15.3 min.

Chemical synthesized (*rac*)-**12c**

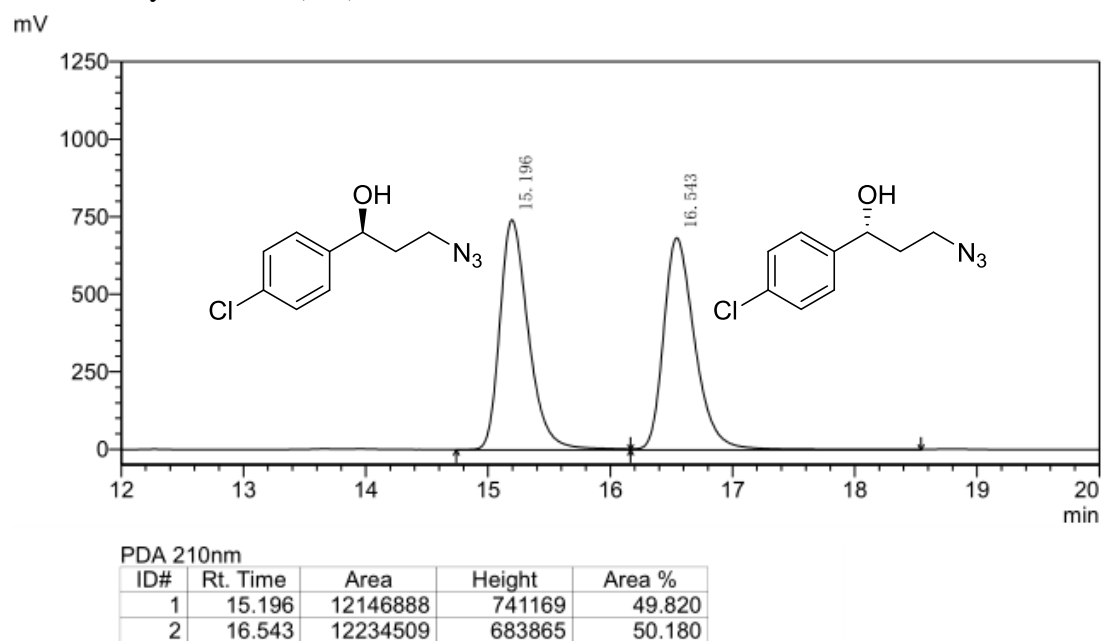

Enzymatic synthesized (*R*)-**12c**

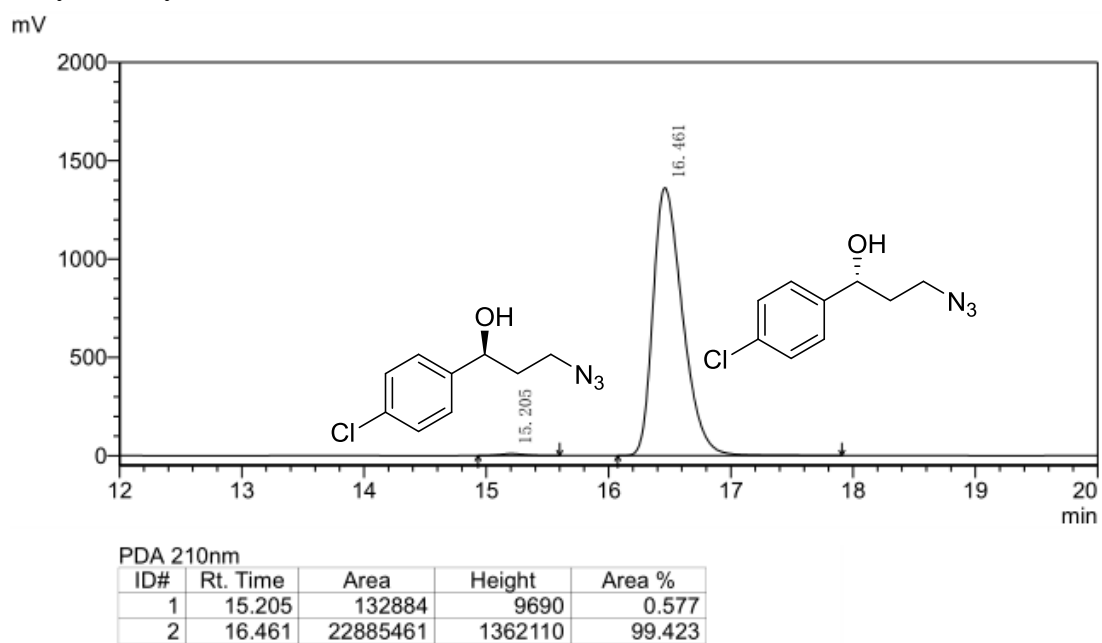

**Chiral HPLC analysis:** Diacel Chiralpak OX-3, *n*-hexane/*i*-PrOH = 97/3, flow rate 0.7 mL/min,  $\lambda$  = 210 nm,  $t_{(S)}$  = 15.2 min,  $t_{(R)}$  = 16.5 min

Chemical synthesized (*rac*)-**13c**

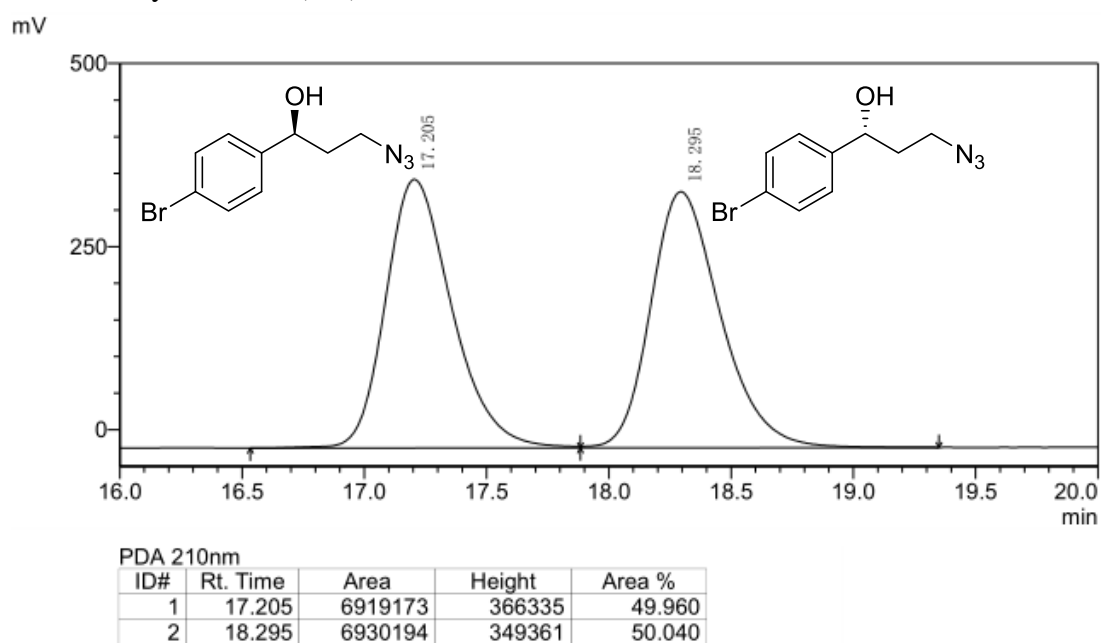

Enzymatic synthesized (*R*)-**13c**

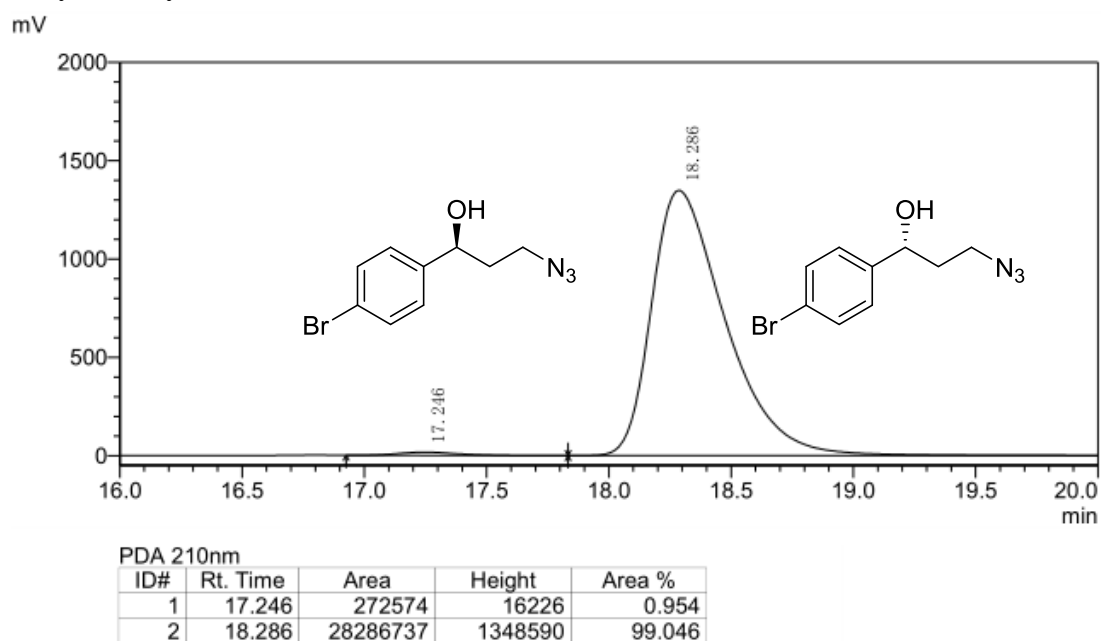

**Chiral HPLC analysis:** Diacel Chiralpak OX-3, *n*-hexane/*i*-PrOH = 97/3, flow rate 0.7 mL/min,  $\lambda$  = 210 nm,  $t_{(S)}$  = 17.2 min,  $t_{(R)}$  = 18.3 min.

Chemical synthesized (*rac*)-**14c**

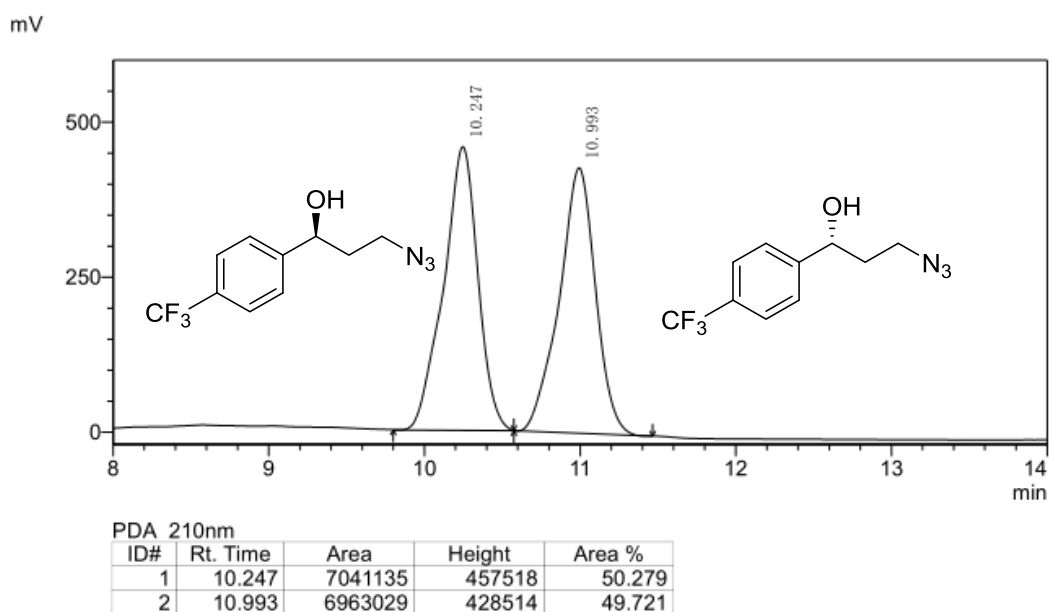

Enzymatic synthesized (*R*)-**14c**

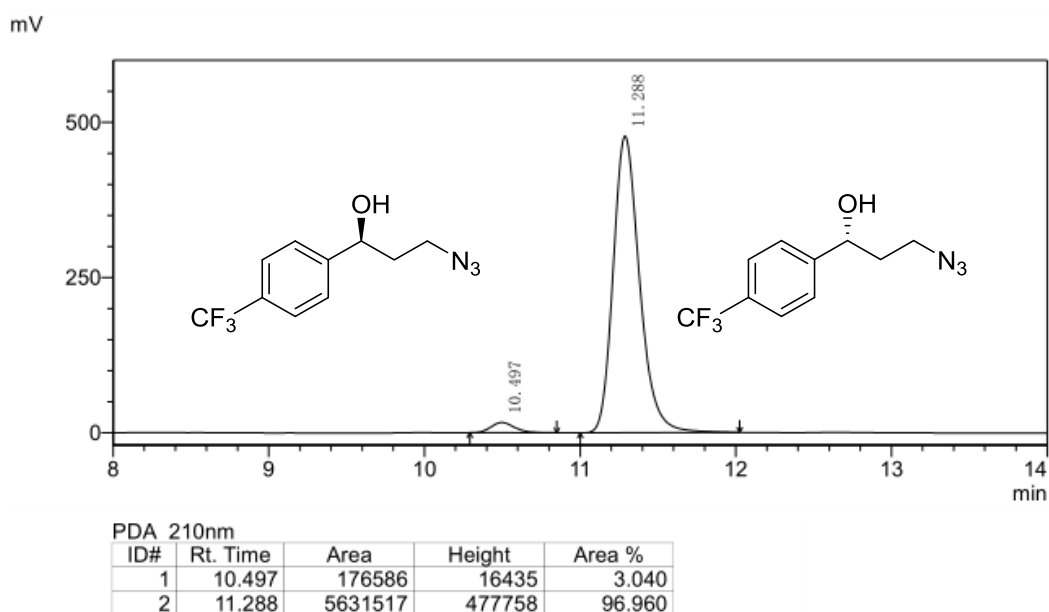

**Chiral HPLC analysis:** Diacel Chiralpak OX-3, *n*-hexane/*i*-PrOH = 97/3, flow rate 0.7 mL/min,  $\lambda$  = 210 nm,  $t_{(S)}$  = 10.5 min,  $t_{(R)}$  = 11.3 min.

Chemical synthesized (*rac*)-**15c**

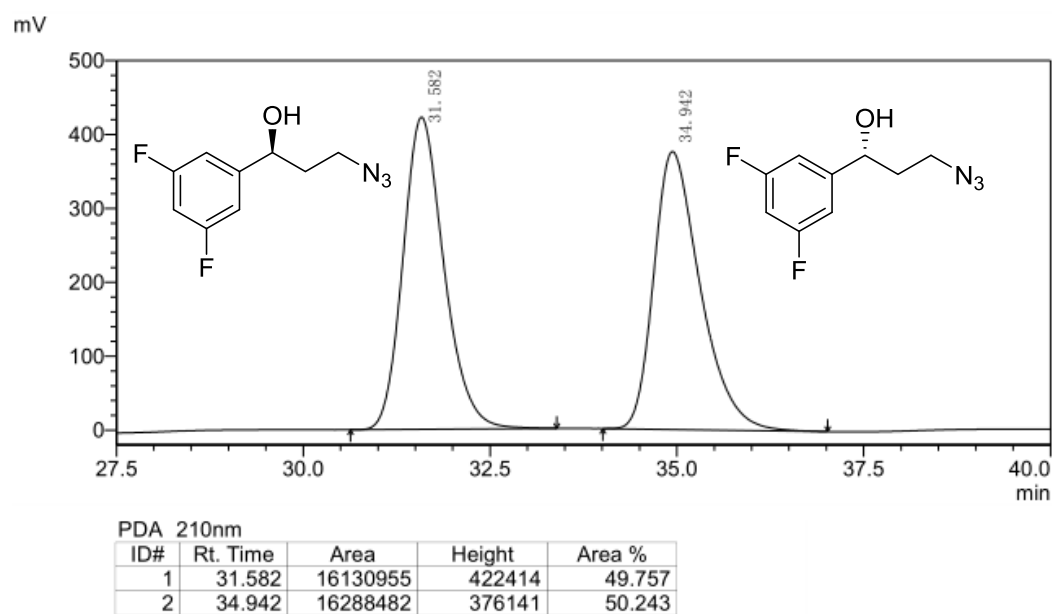

Enzymatic synthesized (*R*)-**15c**

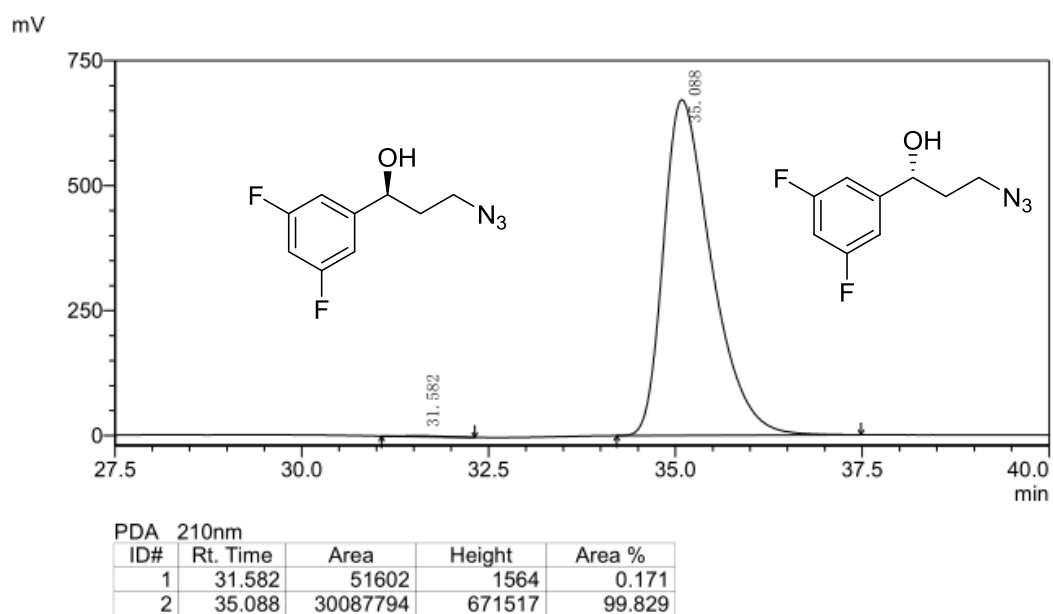

**Chiral HPLC analysis:** Diacel Chiralpak IC-3, *n*-hexane/*i*-PrOH = 99/1, flow rate 0.5 mL/min,  $\lambda$  = 210 nm,  $t_{(S)}$  = 31.6 min,  $t_{(R)}$  = 35.1 min.

Chemical synthesized (*rac*)-**16c**

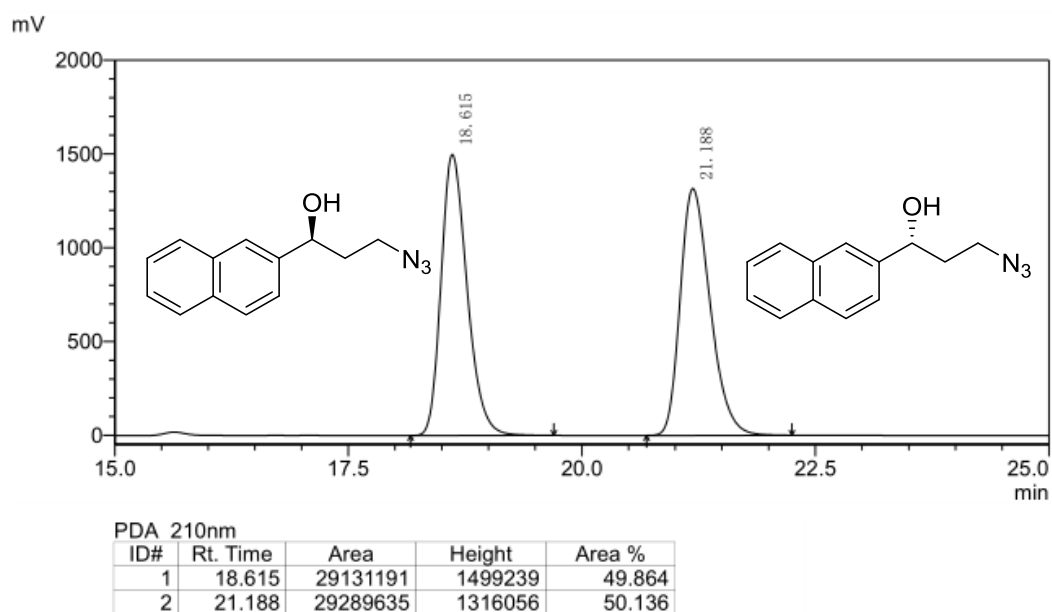

Enzymatic synthesized (*R*)-**16c**

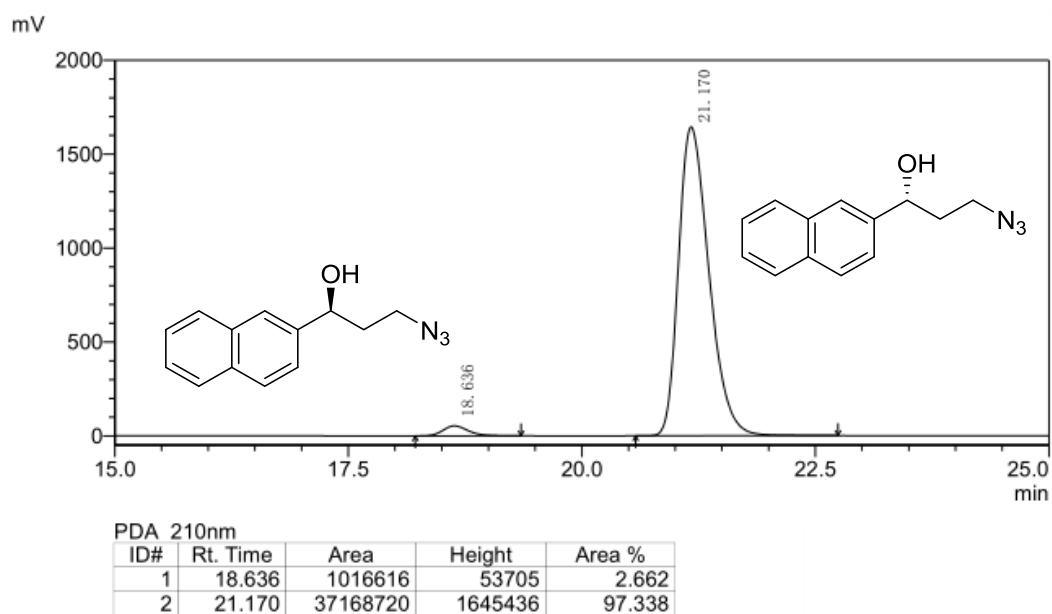

**Chiral HPLC analysis:** Diacel Chiralpak OX-3, *n*-hexane/*i*-PrOH = 97/3, flow rate 0.7 mL/min,  $\lambda$  = 210 nm,  $t_{(S)}$  = 18.6 min,  $t_{(R)}$  = 21.2 min.

Chemical synthesized (*rac*)-**17c**

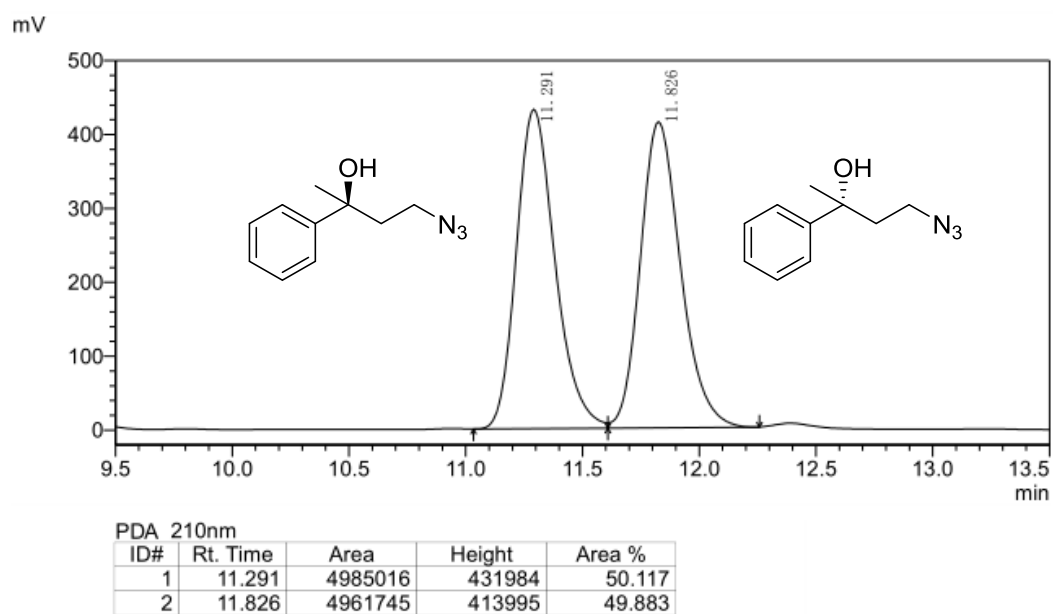

Enzymatic synthesized (*R*)-**17c**

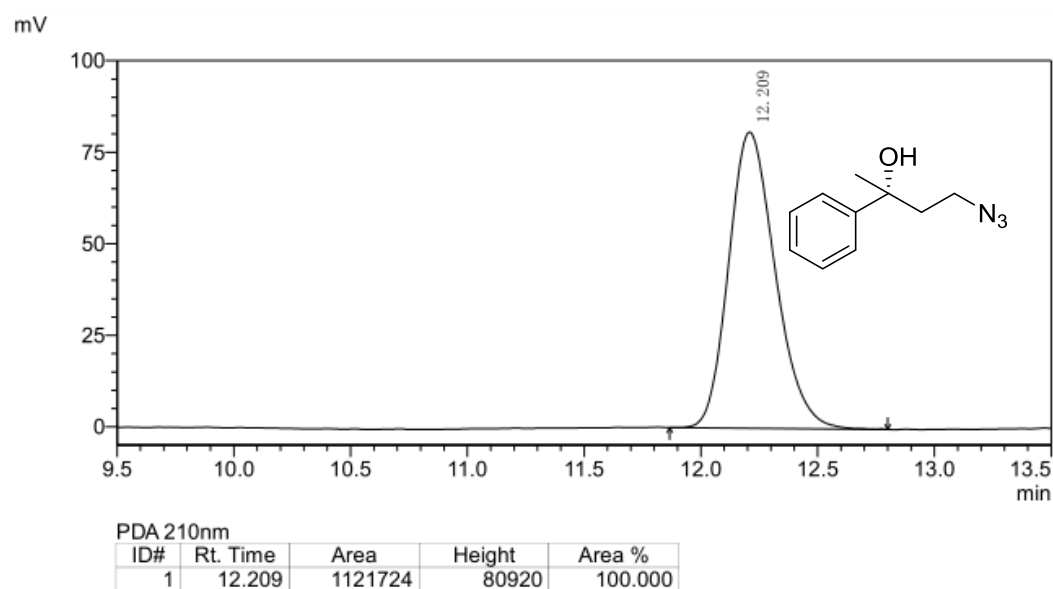

**Chiral HPLC analysis:** Diacel Chiralpak OX-3, *n*-hexane/*i*-PrOH = 97/3, flow rate 0.7 mL/min,  $\lambda$  = 210 nm,  $t_{(S)}$  = 11.3 min,  $t_{(R)}$  = 11.8 min.

Chemical synthesized (*rac*)-**18c**

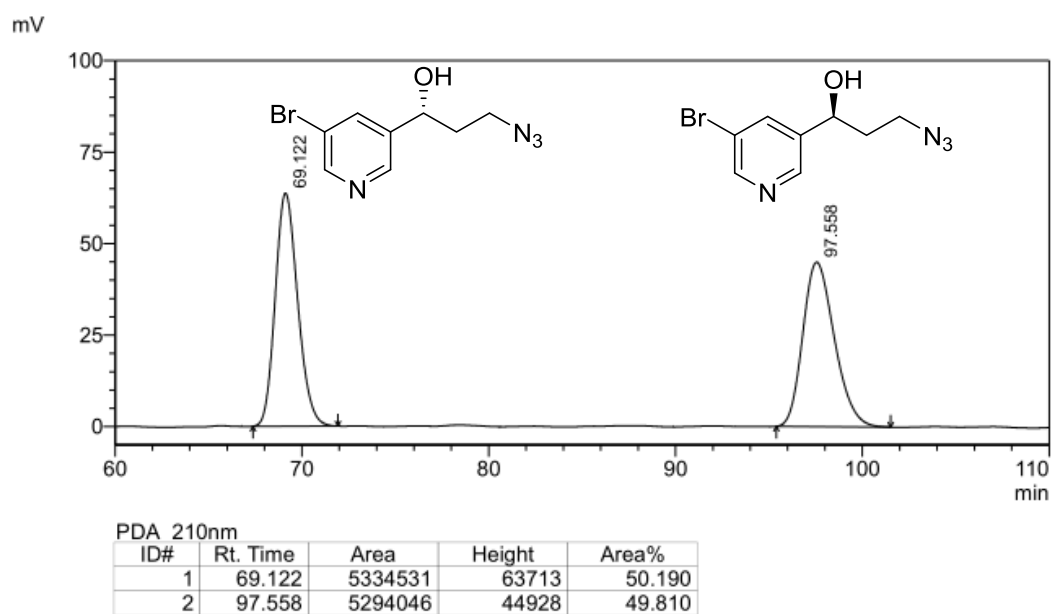

Enzymatic synthesized (*R*)-**18c**

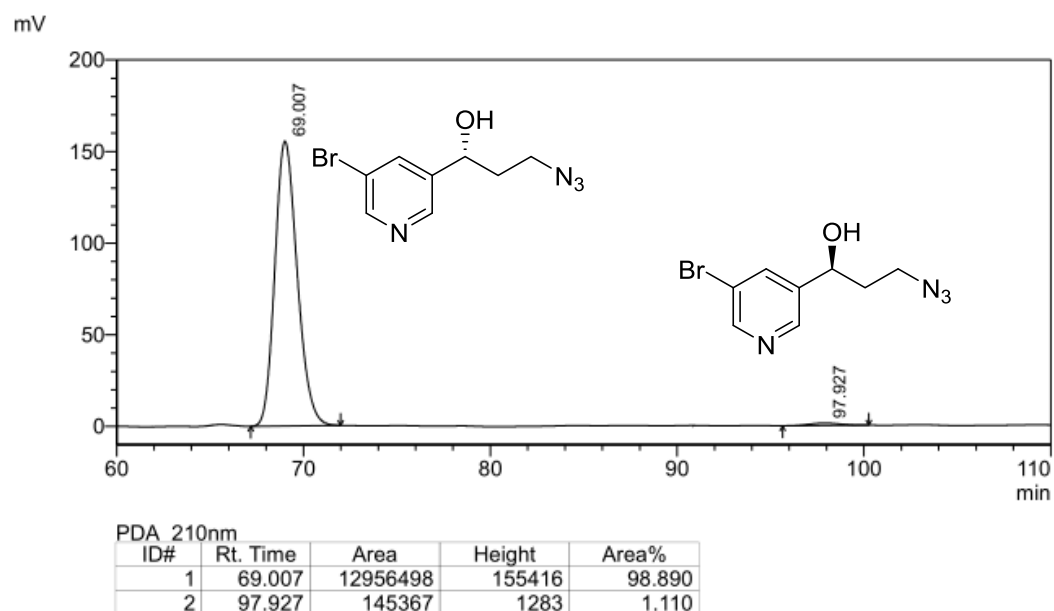

**Chiral HPLC analysis:** Diacel Chiralpak AD-H, *n*-hexane/*i*-PrOH = 97/3, flow rate 0.5 mL/min,  $\lambda$  = 210 nm,  $t_{(R)}$  = 69.0 min,  $t_{(S)}$  = 97.9 min.



Chemical synthesized (*rac*)-**19c**

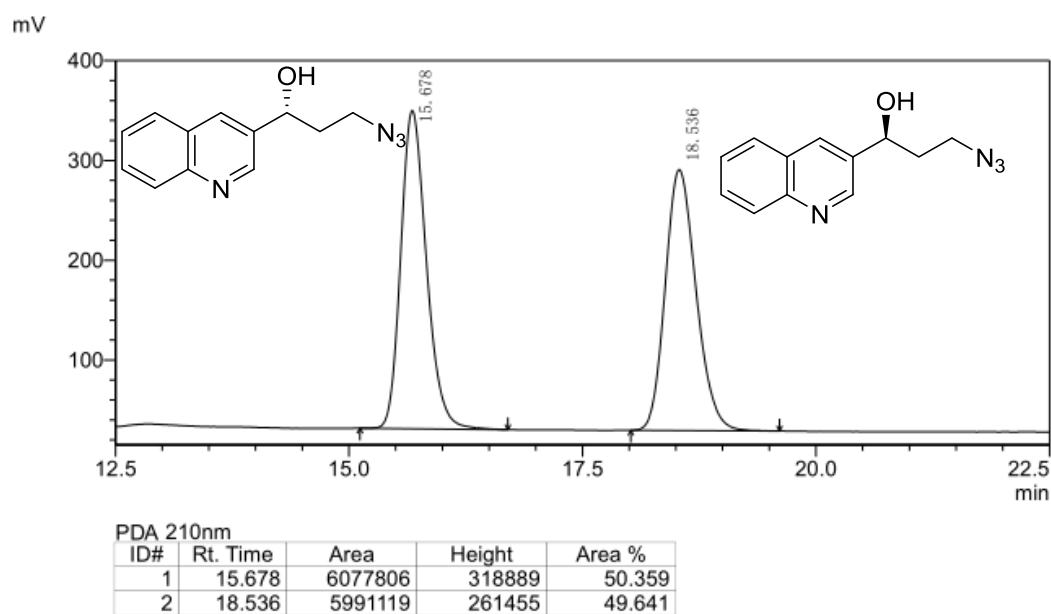

Enzymatic synthesized (*R*)-**19c**

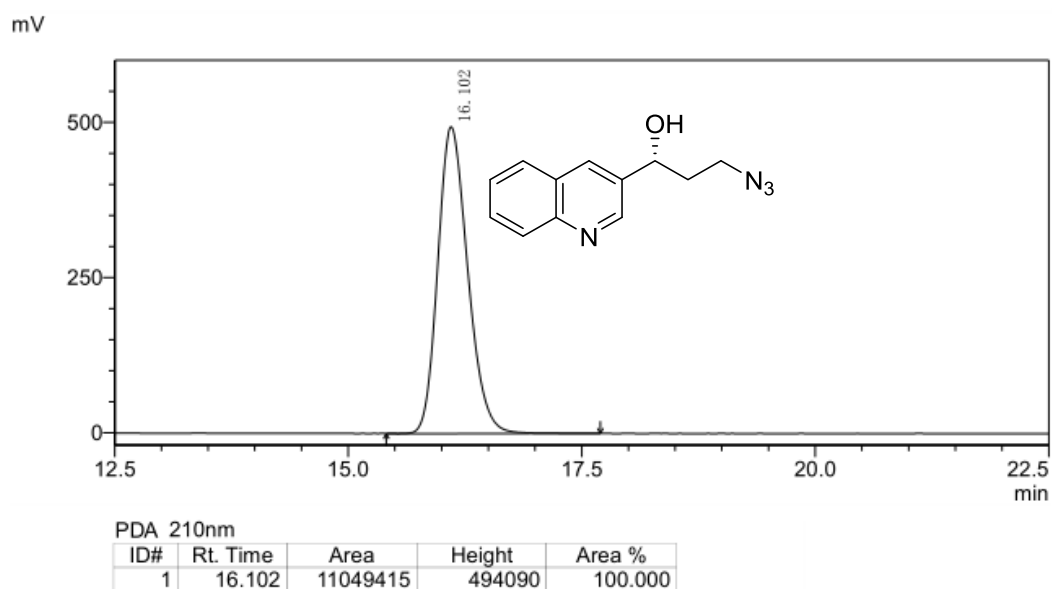

**Chiral HPLC analysis:** Diacel Chiralpak OJ-H, *n*-hexane/*i*-PrOH = 90/10, flow rate 1.0 mL/min,  $\lambda$  = 210 nm,  $t_{(R)}$  = 15.7 min,  $t_{(S)}$  = 18.6 min.

Chemical synthesized (*rac*)-**21c**

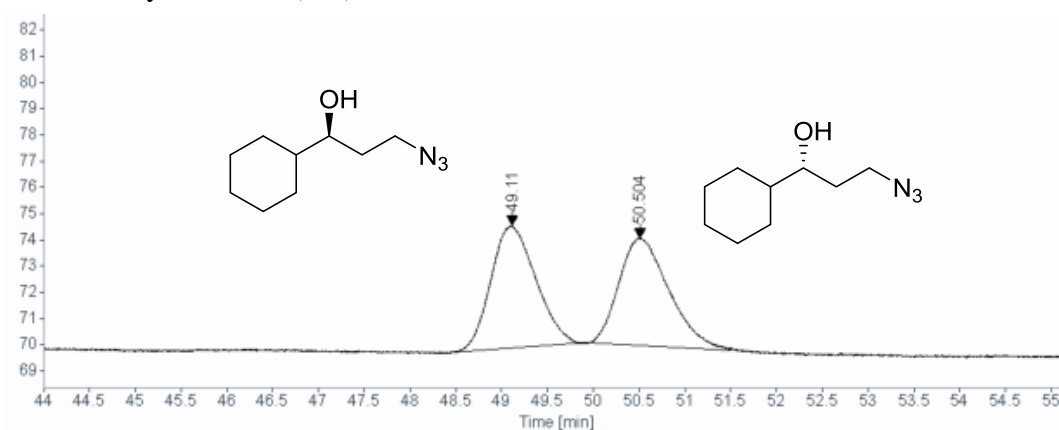

| ID# | Ret. Time | Area    | Height | Area%  | Resolution |
|-----|-----------|---------|--------|--------|------------|
| 1   | 49.110    | 161.409 | 4.702  | 50.686 |            |
| 1   | 50.504    | 157.040 | 4.116  | 49.314 | 1.453      |

Enzymatic synthesized (*R*)-**21c**

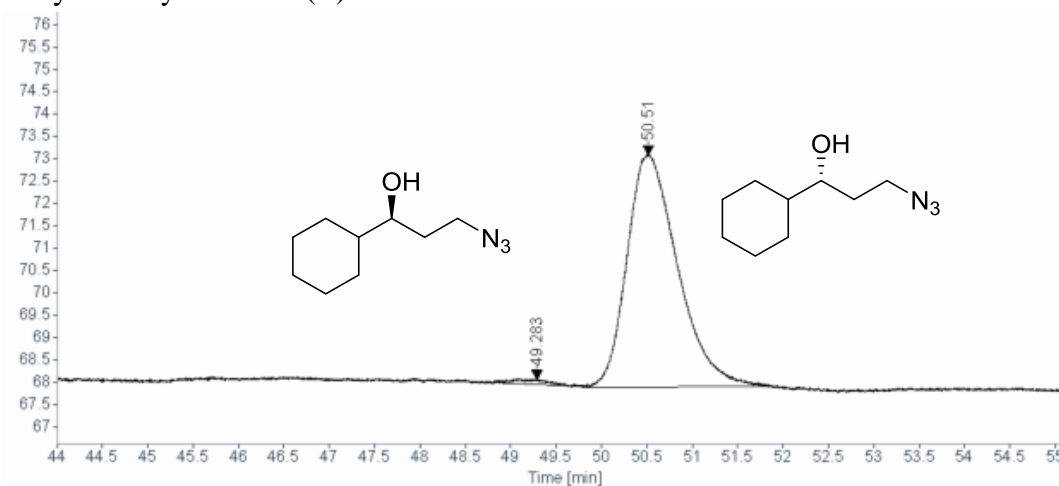

| ID# | Ret. Time | Area    | Height | Area%  | Resolution |
|-----|-----------|---------|--------|--------|------------|
| 1   | 49.283    | 3.351   | 0.122  | 1.619  |            |
| 1   | 50.510    | 203.651 | 5.209  | 98.381 | 2.011      |

**Chiral GC analysis:** Rt-bDEXcst (RESTEK), 140°C for 60 min,  $t_{(S)} = 49.3$  min,  $t_{(R)} = 50.5$  min.

Chemical synthesized (*rac*)-**1d**

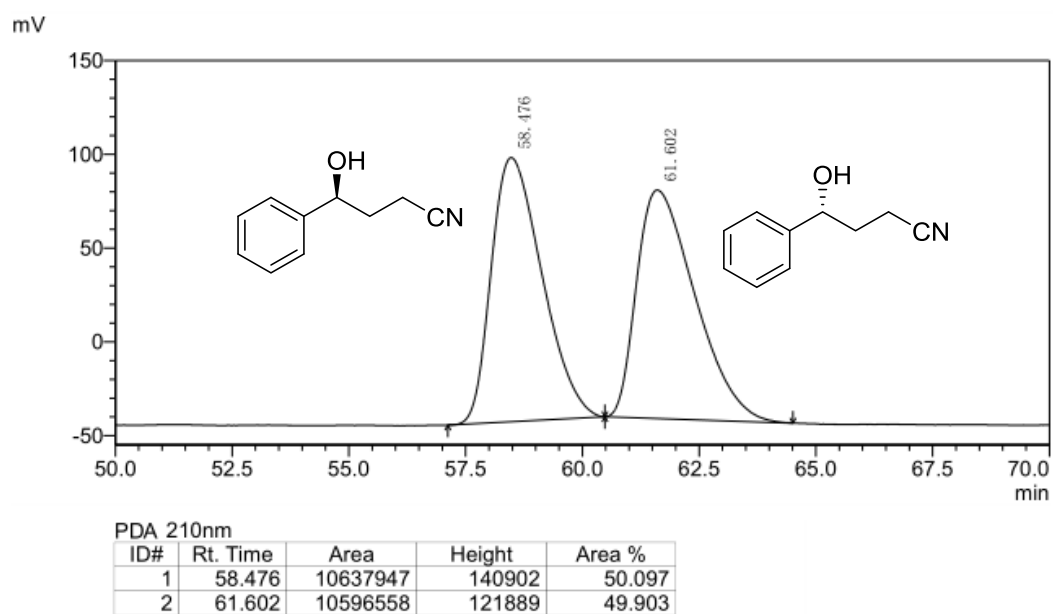

Enzymatic synthesized (*R*)-**1d**

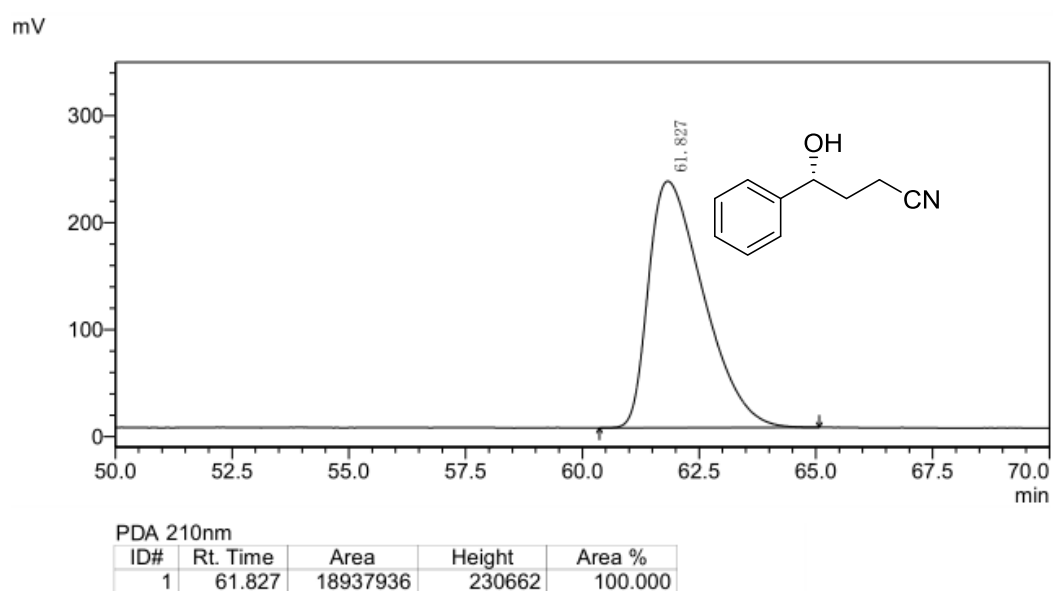

**Chiral HPLC analysis:** Diacel Chiralpak IH, *n*-hexane/*i*-PrOH = 95/5, flow rate 0.5 mL/min,  $\lambda$  = 210 nm,  $t_{(S)}$  = 58.5 min,  $t_{(R)}$  = 61.6 min.

Chemical synthesized (*rac*)-**1e**

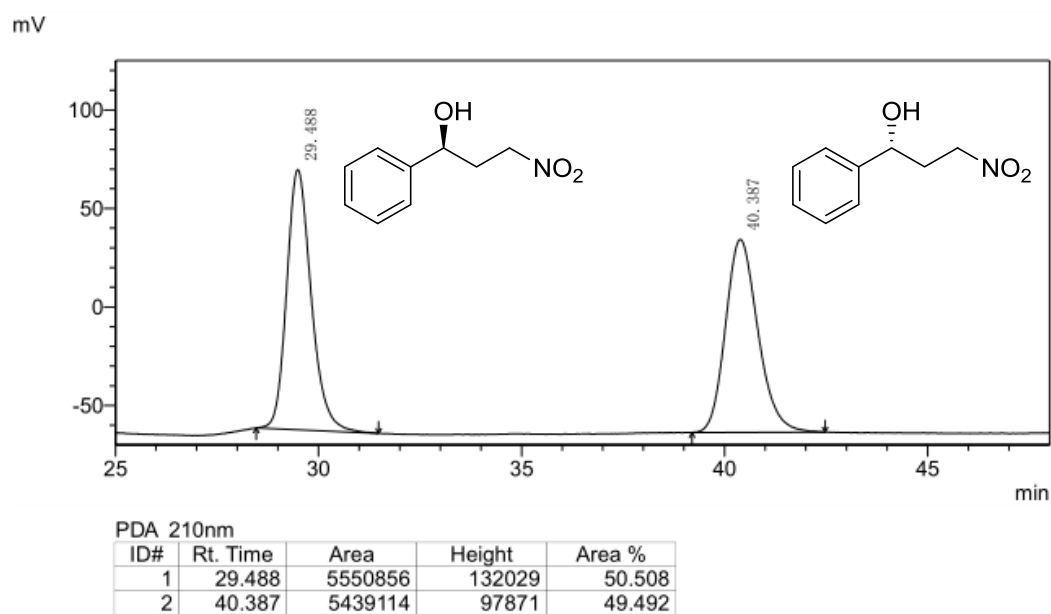

Enzymatic synthesized (*R*)-**1e**

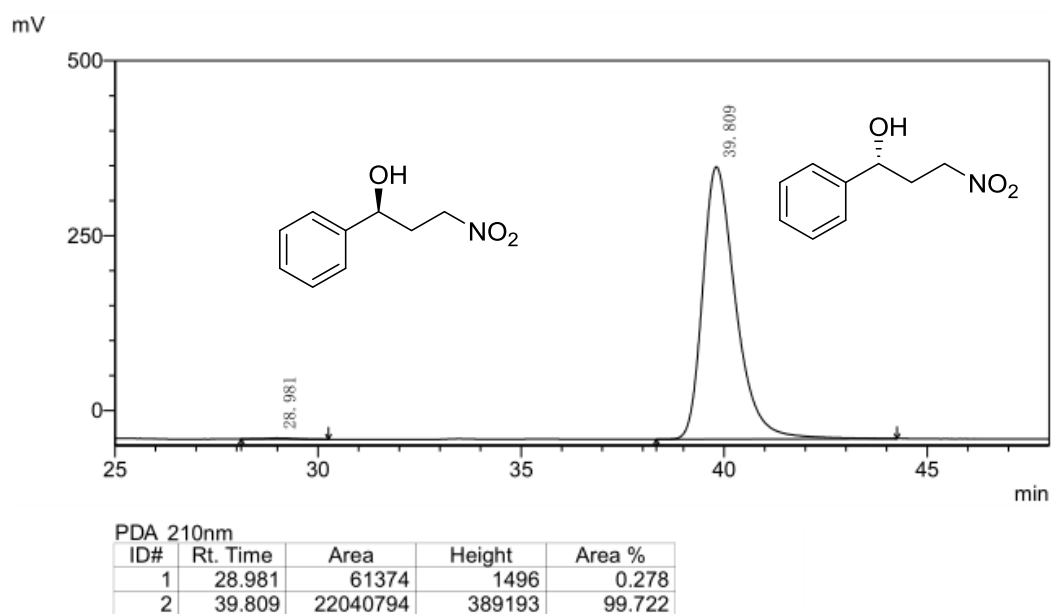

**Chiral HPLC analysis:** Diacel Chiralpak OD-H, *n*-hexane/*i*-PrOH = 90/10, flow rate 0.5 mL/min,  $\lambda$  = 210 nm,  $t_{(S)}$  = 29.0 min,  $t_{(R)}$  = 39.8 min.

### Commercial (*rac*)-**1f**

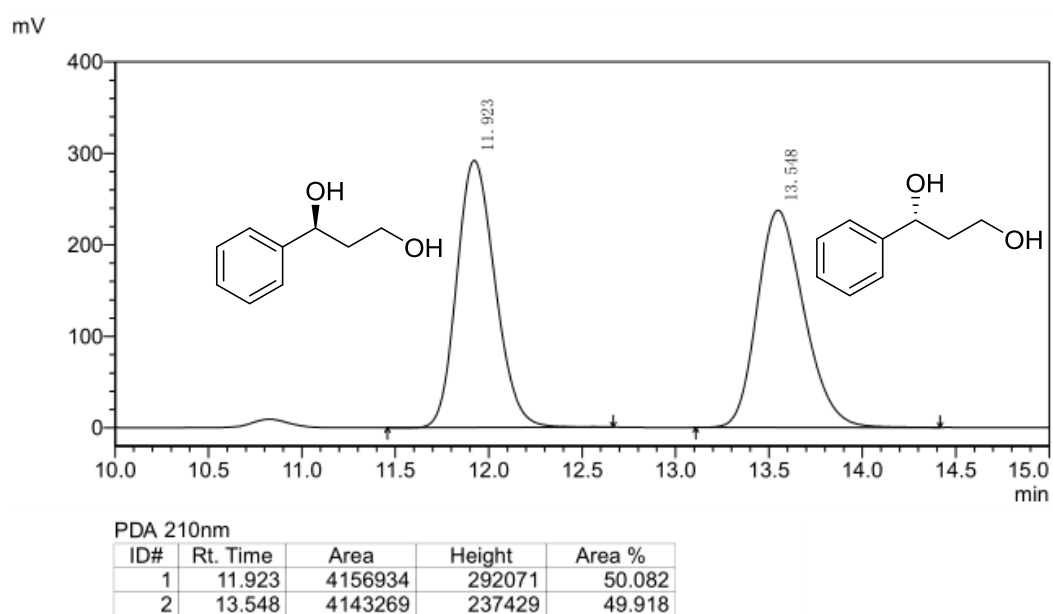

### Enzymatic synthesized (*R*)-**1f**

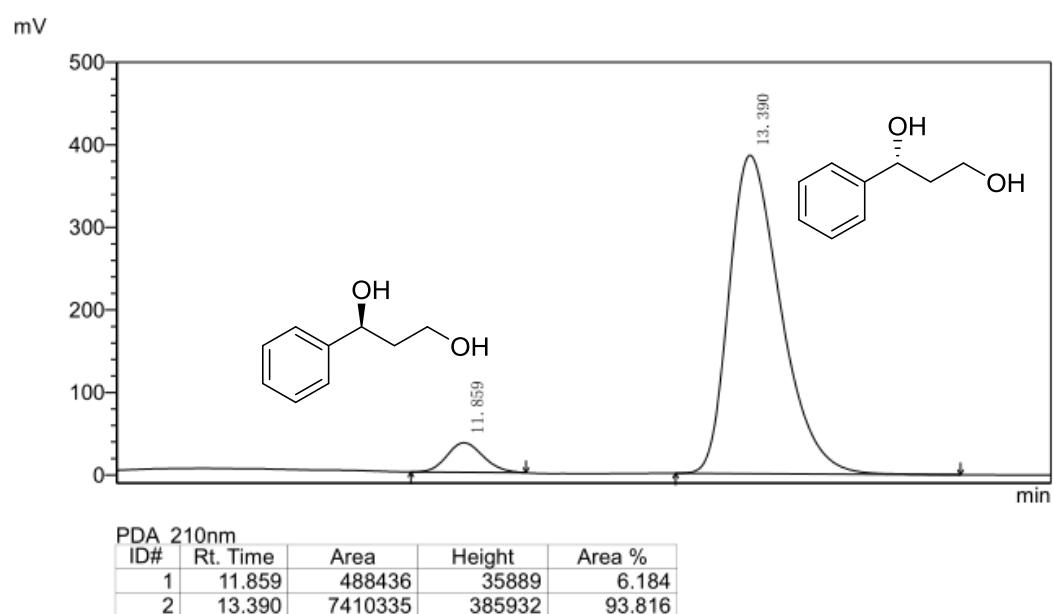

**Chiral HPLC analysis:** Diacel Chiralpak IH, *n*-hexane/*i*-PrOH = 88/12, flow rate 0.8 mL/min,  $\lambda$  = 210 nm,  $t_{(S)}$  = 11.9 min,  $t_{(R)}$  = 13.4 min.

Chemical synthesized (*rac*)-**1a**

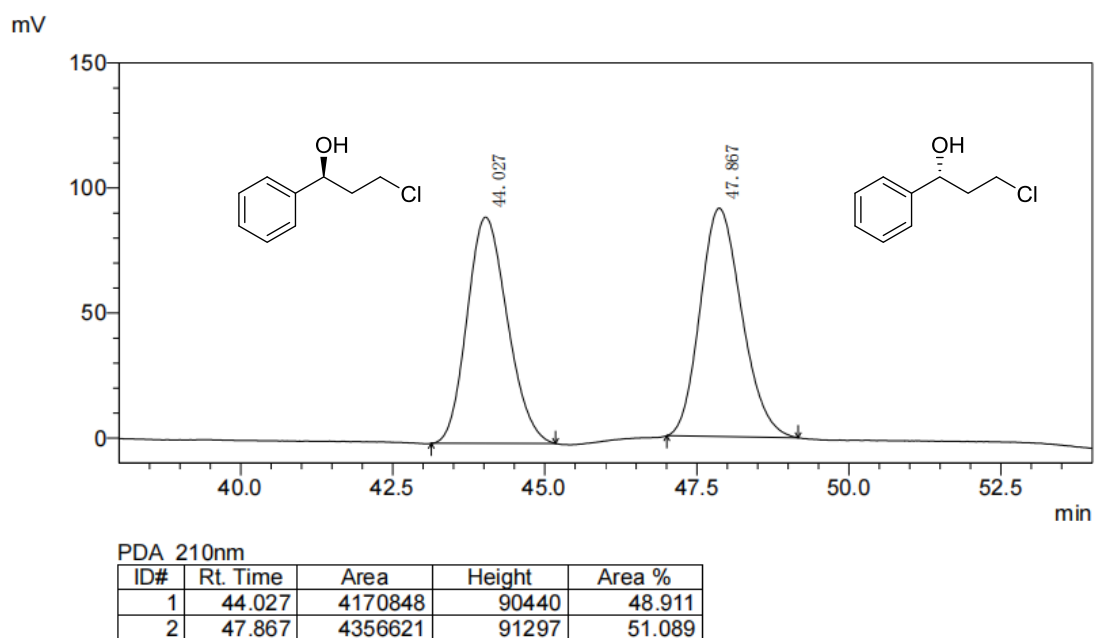

Enzymatic synthesized (*S*)-**1a** by biocatalytic cascade

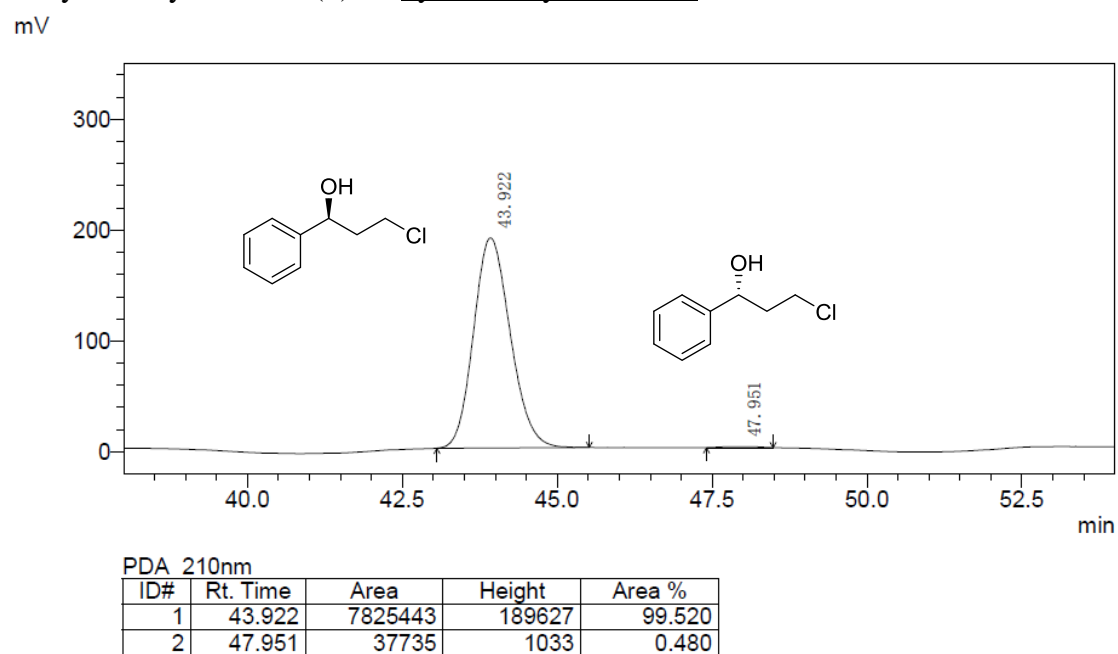

**Chiral HPLC analysis:** Diacel Chiralpak OX-3, *n*-hexane/*i*-PrOH = 99/1, flow rate 0.5 mL/min,  $\lambda$  = 210 nm,  $t_{(S)}$  = 43.9 min,  $t_{(R)}$  = 48.0 min.

### Chemical synthesized (*rac*)-**1c**

mV

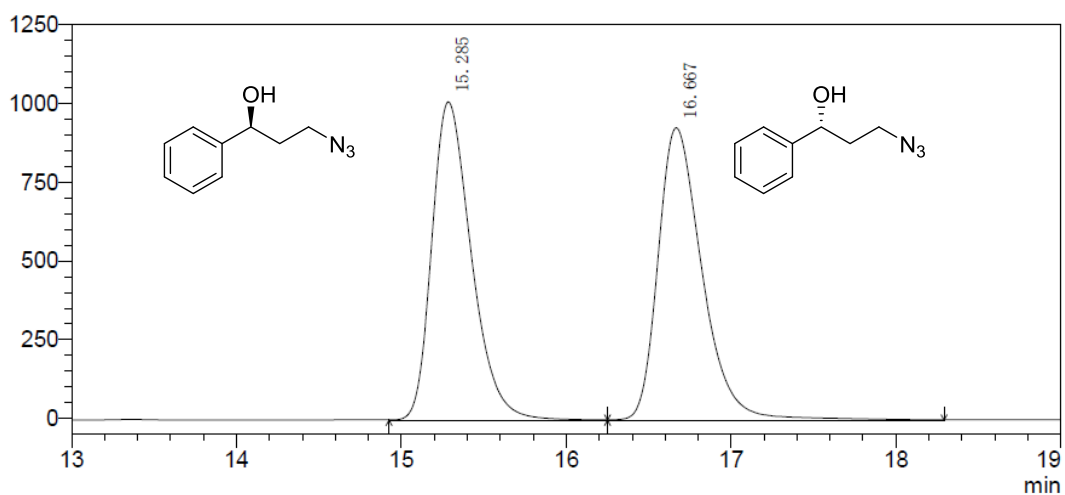

PDA 210nm

| ID# | Rt. Time | Area     | Height  | Area % |
|-----|----------|----------|---------|--------|
| 1   | 15.285   | 16871725 | 1011036 | 49.343 |
| 2   | 16.667   | 17320955 | 929151  | 50.657 |

### Enzymatic synthesized (*R*)-**1c** by biocatalytic cascade

mV

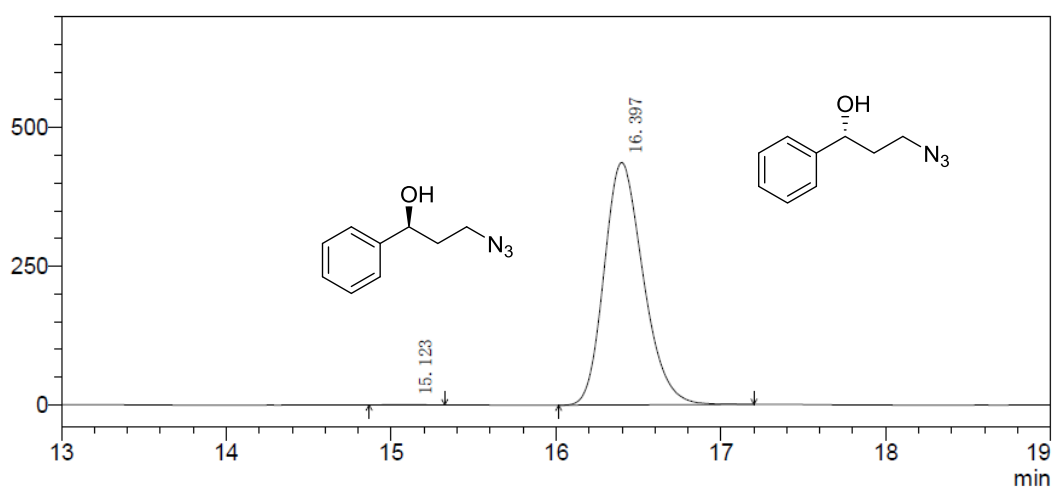

PDA 210nm

| ID# | Rt. Time | Area    | Height | Area % |
|-----|----------|---------|--------|--------|
| 1   | 15.123   | 5265    | 342    | 0.073  |
| 2   | 16.397   | 7235612 | 437411 | 99.927 |

**Chiral HPLC analysis:** Diacel Chiralpak OX-3, *n*-hexane/*i*-PrOH = 97/3, flow rate 0.7 mL/min,  $\lambda$  = 210 nm,  $t_{(S)}$  = 15.1 min,  $t_{(R)}$  = 16.4 min.

Chemical synthesized (*rac*)-**6a**

mV

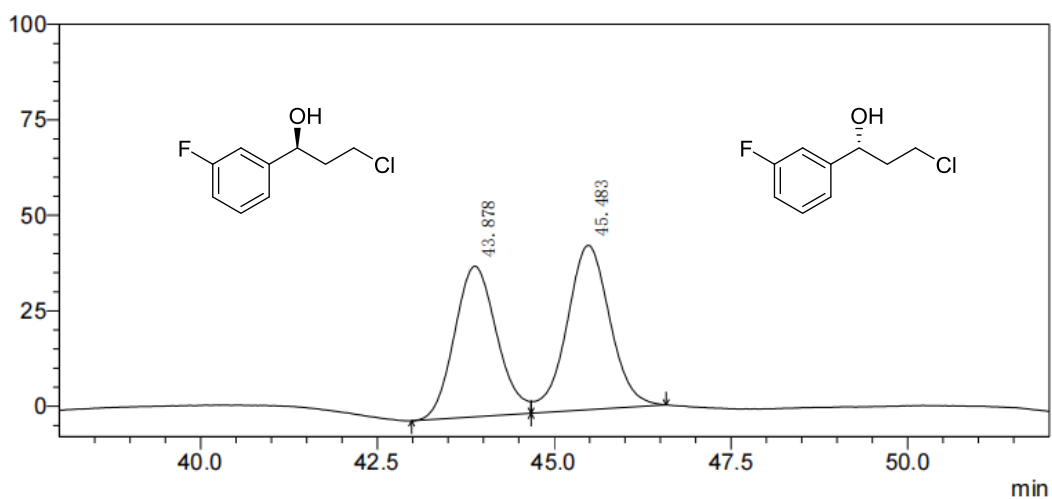

PDA 210nm

| ID# | Rt. Time | Area    | Height | Area % |
|-----|----------|---------|--------|--------|
| 1   | 43.878   | 1640174 | 39450  | 47.347 |
| 2   | 45.483   | 1823950 | 43025  | 52.653 |

Enzymatic synthesized (*S*)-**6a** by biocatalytic cascade

mV

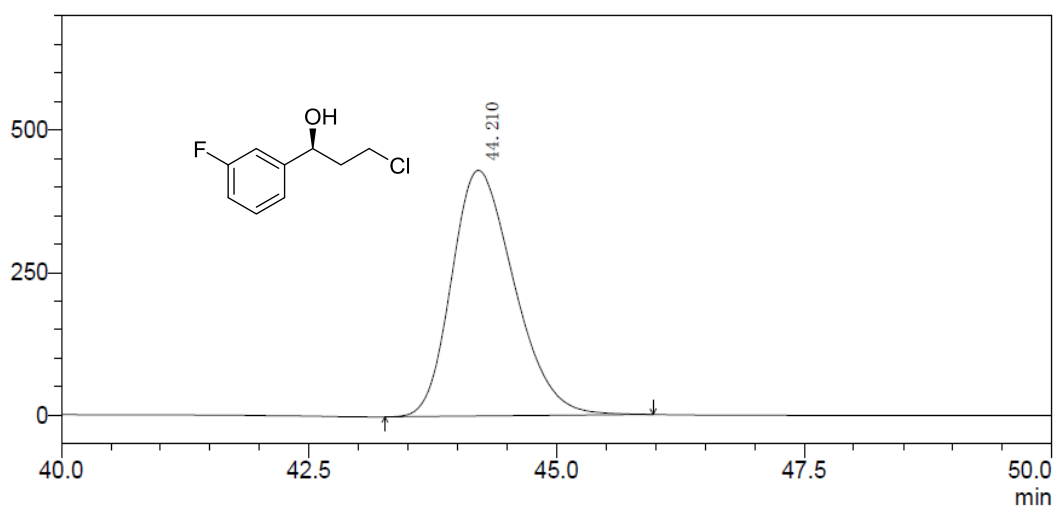

PDA 210nm

| ID# | Rt. Time | Area     | Height | Area %  |
|-----|----------|----------|--------|---------|
| 1   | 44.210   | 18961655 | 430762 | 100.000 |

**Chiral HPLC analysis:** Diacel Chiralpak OX-3, *n*-hexane/*i*-PrOH = 99/1, flow rate 0.5 mL/min,  $\lambda$  = 210 nm,  $t_{(S)}$  = 44.2 min.



Chemical synthesized (*rac*)-**6c**

mV

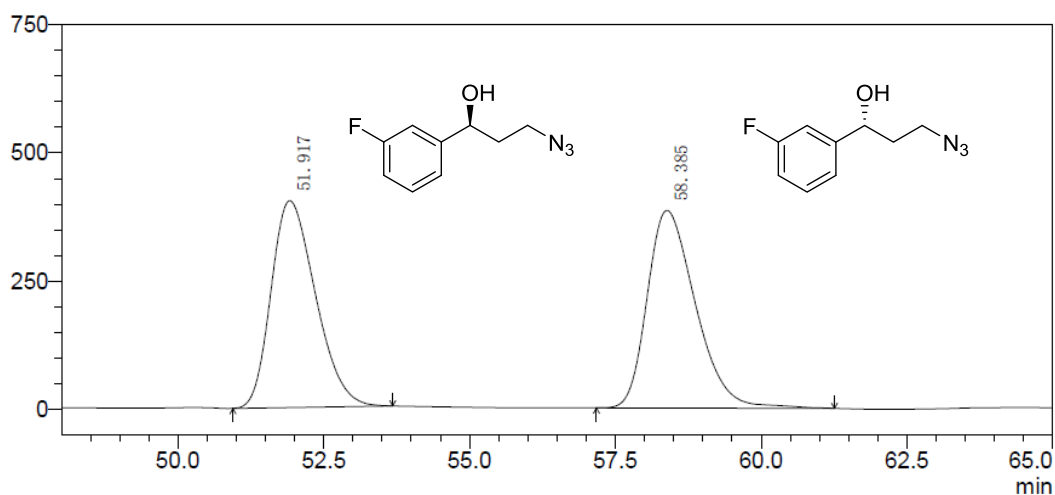

PDA 210nm

| ID# | Rt. Time | Area     | Height | Area % |
|-----|----------|----------|--------|--------|
| 1   | 51.917   | 21405810 | 403687 | 49.041 |
| 2   | 58.385   | 22242570 | 385396 | 50.959 |

Enzymatic synthesized (*R*)-**6c** by biocatalytic cascade

mV

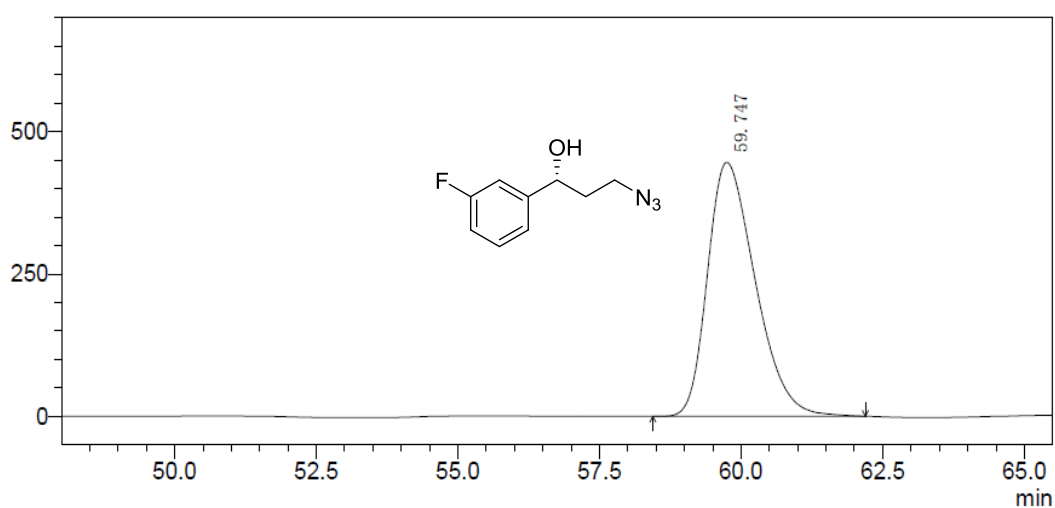

PDA 210nm

| ID# | Rt. Time | Area     | Height | Area %  |
|-----|----------|----------|--------|---------|
| 1   | 59.747   | 26158933 | 445998 | 100.000 |

**Chiral HPLC analysis:** Diacel Chiralpak OX-3, *n*-hexane/*i*-PrOH = 99/1, flow rate 0.5 mL/min,  $\lambda$  = 210 nm,  $t_{(R)}$  = 59.7 min.

Chemical synthesized (*rac*)-**7a**

mV

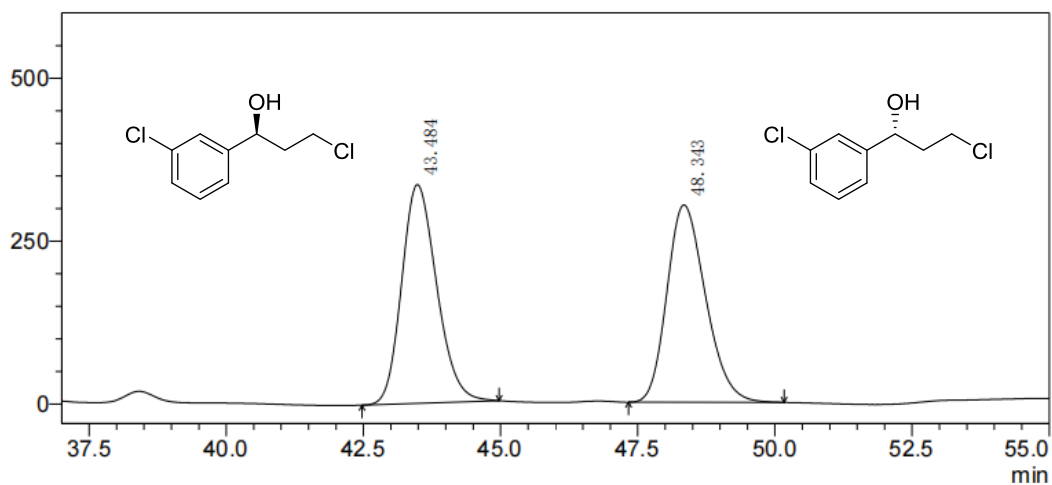

PDA 210nm

| ID# | Rt. Time | Area     | Height | Area % |
|-----|----------|----------|--------|--------|
| 1   | 43.484   | 14910958 | 335534 | 50.069 |
| 2   | 48.343   | 14869975 | 302683 | 49.931 |

Enzymatic synthesized (*S*)-**7a** by biocatalytic cascade

mV

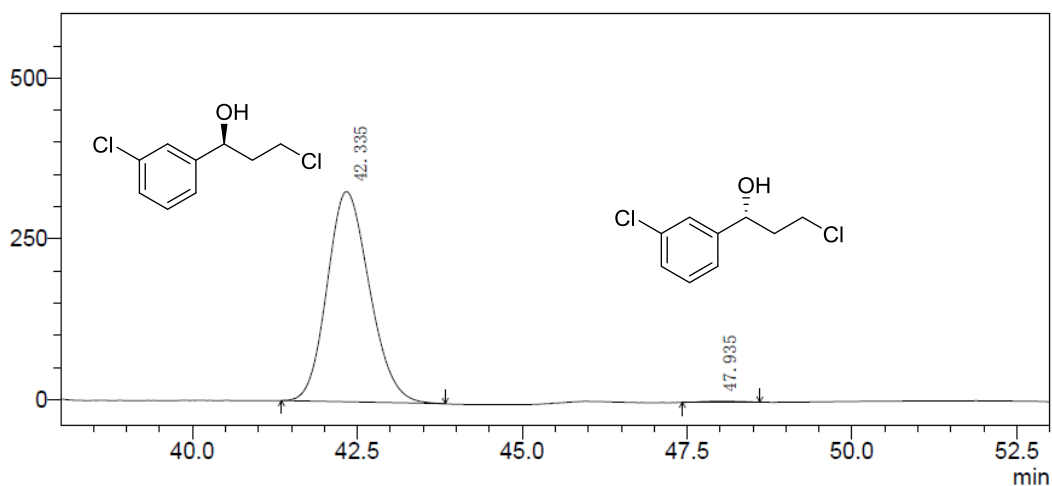

PDA 210nm

| ID# | Rt. Time | Area     | Height | Area % |
|-----|----------|----------|--------|--------|
| 1   | 42.335   | 14649208 | 326818 | 99.591 |
| 2   | 47.935   | 60100    | 1908   | 0.409  |

**Chiral HPLC analysis:** Diacel Chiralpak OX-3, *n*-hexane/*i*-PrOH = 99/1, flow rate 0.5 mL/min,  $\lambda$  = 210 nm,  $t_{(S)}$  = 42.3 min,  $t_{(R)}$  = 47.9 min.

### Chemical synthesized (*rac*)-**7c**

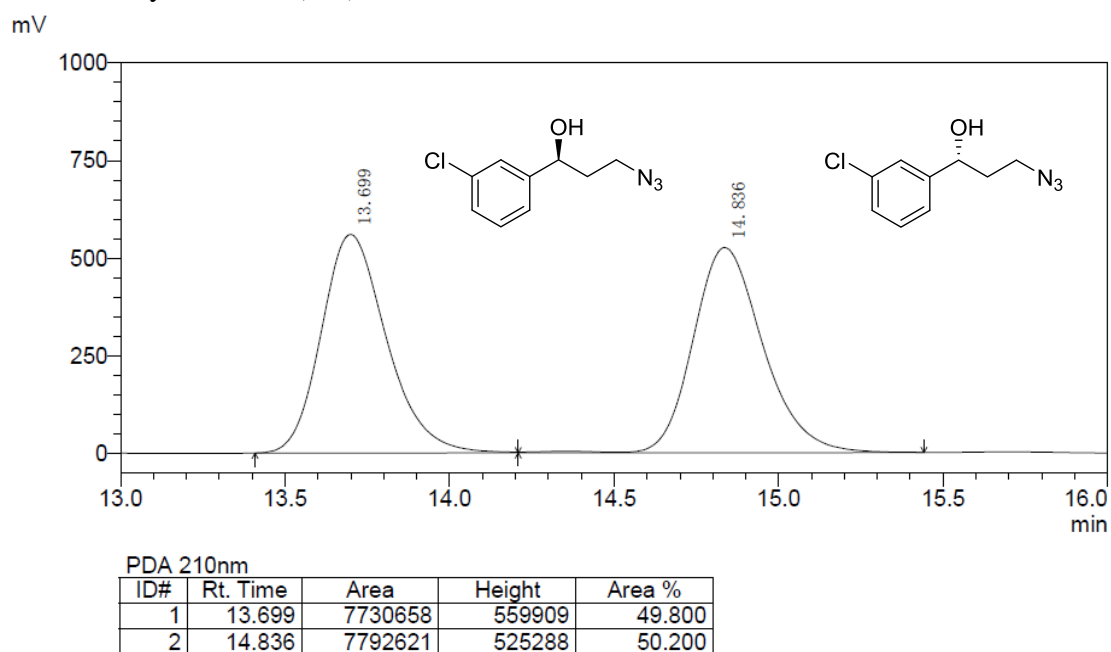

### Enzymatic synthesized (*R*)-**7c** by biocatalytic cascade

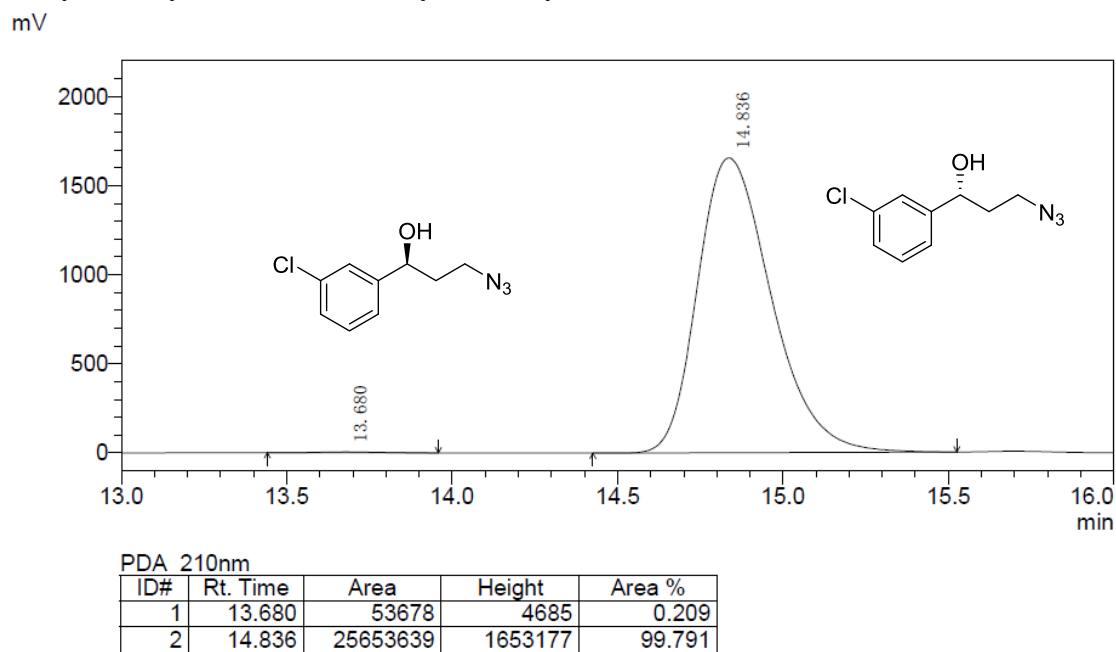

**Chiral HPLC analysis:** Diacel Chiralpak OX-3, *n*-hexane/*i*-PrOH = 97/3, flow rate 0.7 mL/min,  $\lambda$  = 210 nm,  $t_{(S)}$  = 13.7 min,  $t_{(R)}$  = 14.8 min.

Chemical synthesized (*rac*)-**1aa**

mV

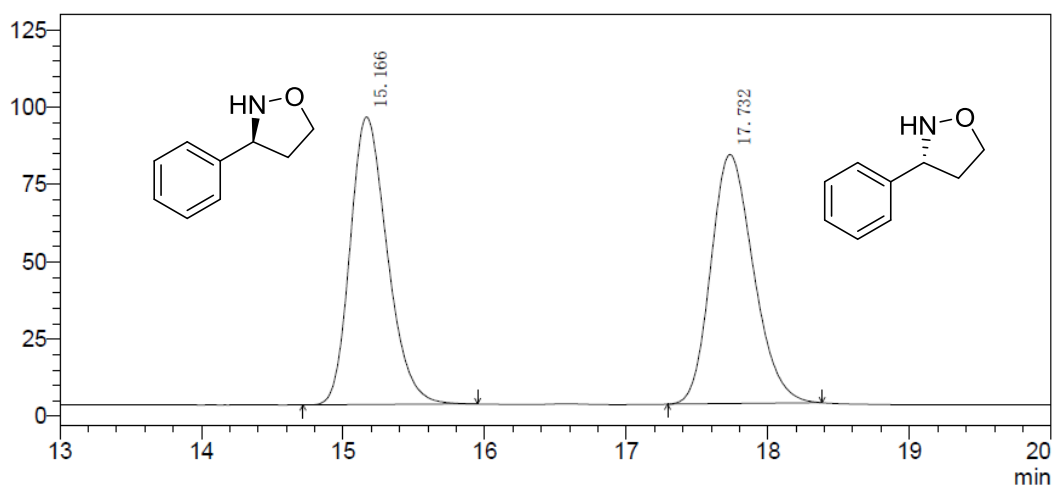

PDA 210nm

| ID# | Rt. Time | Area    | Height | Area % |
|-----|----------|---------|--------|--------|
| 1   | 15.166   | 1699329 | 93161  | 50.146 |
| 2   | 17.732   | 1689463 | 80657  | 49.854 |

Enzymatic synthesized (*R*)-**1aa**

mV

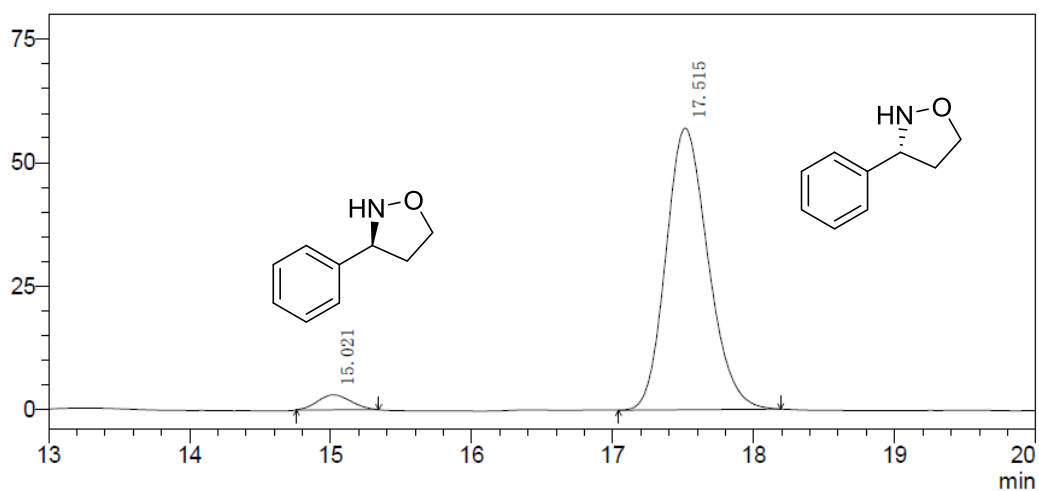

PDA 210nm

| ID# | Rt. Time | Area    | Height | Area % |
|-----|----------|---------|--------|--------|
| 1   | 15.021   | 49883   | 3037   | 4.039  |
| 2   | 17.515   | 1185229 | 57057  | 95.961 |

**Chiral HPLC analysis:** Diacel Chiralpak OJ-H, *n*-hexane/*i*-PrOH = 90/10, flow rate 1.0 mL/min,  $\lambda$  = 210 nm,  $t_{(S)}$  = 15.0 min,  $t_{(R)}$  = 17.5 min.

### Chemical synthesized (*rac*)-**1ab**

mV

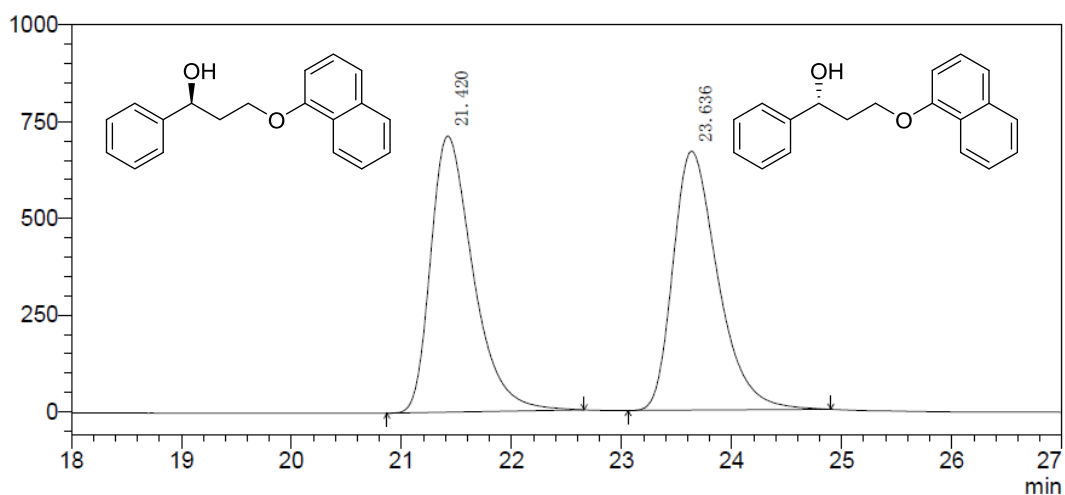

PDA 210nm

| ID# | Rt. Time | Area     | Height | Area % |
|-----|----------|----------|--------|--------|
| 1   | 21.420   | 19097565 | 713506 | 50.117 |
| 2   | 23.636   | 19008421 | 669229 | 49.883 |

### Enzymatic synthesized (*S*)-**1ab**

mV

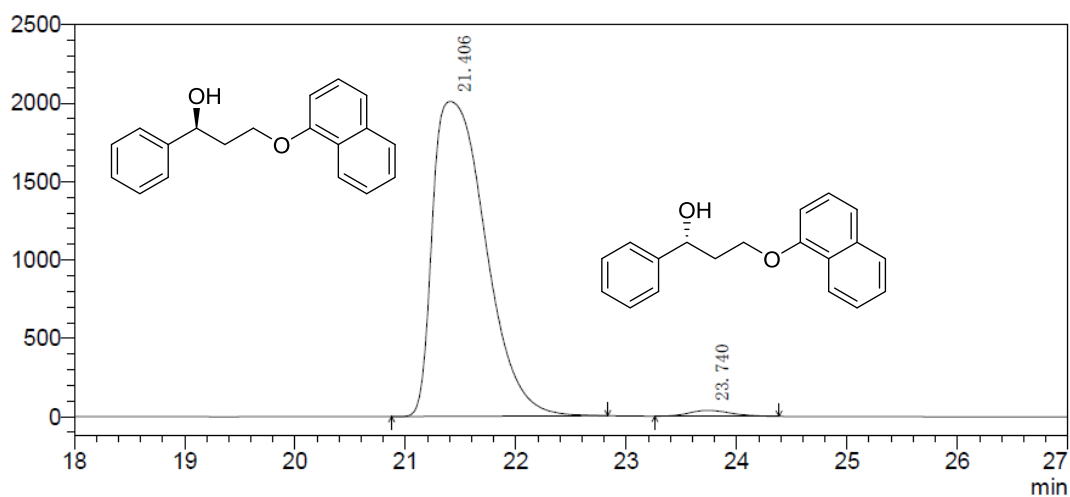

PDA 210nm

| ID# | Rt. Time | Area     | Height  | Area % |
|-----|----------|----------|---------|--------|
| 1   | 21.406   | 66945044 | 2008535 | 98.544 |
| 2   | 23.740   | 988981   | 37912   | 1.456  |

**Chiral HPLC analysis:** Diacel Chiralpak OX-3, *n*-hexane/*i*-PrOH = 97/3, flow rate 0.7 mL/min,  $\lambda$  = 210 nm,  $t_{(S)}$  = 21.4 min,  $t_{(R)}$  = 23.7 min.

# Chemical synthesized (*rac*)-**1ba**

mV

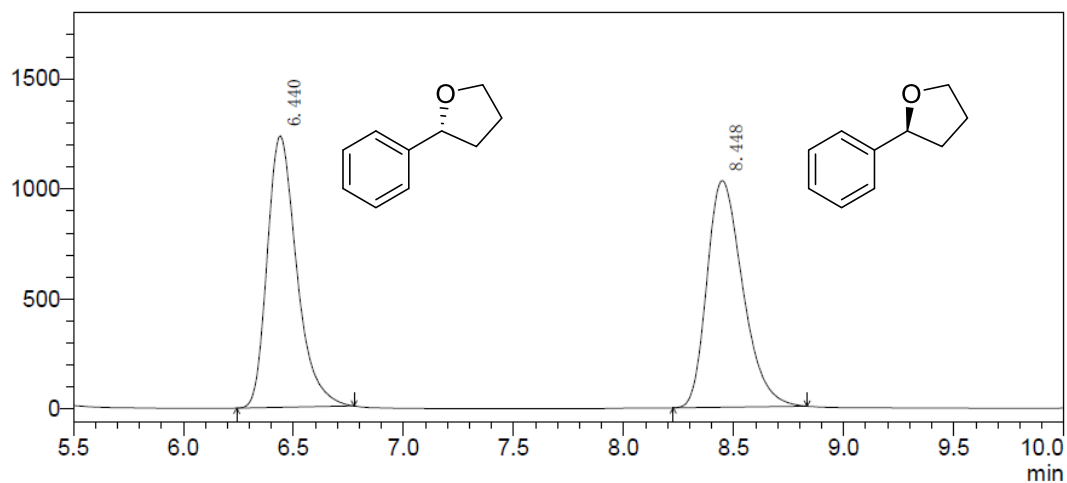

PDA 214nm

| ID# | Rt. Time | Area     | Height  | Area % |
|-----|----------|----------|---------|--------|
| 1   | 6.440    | 11512592 | 1232992 | 49.620 |
| 2   | 8.448    | 11689064 | 1030364 | 50.380 |

# Enzymatic synthesized (*R*)-**1ba**

mV

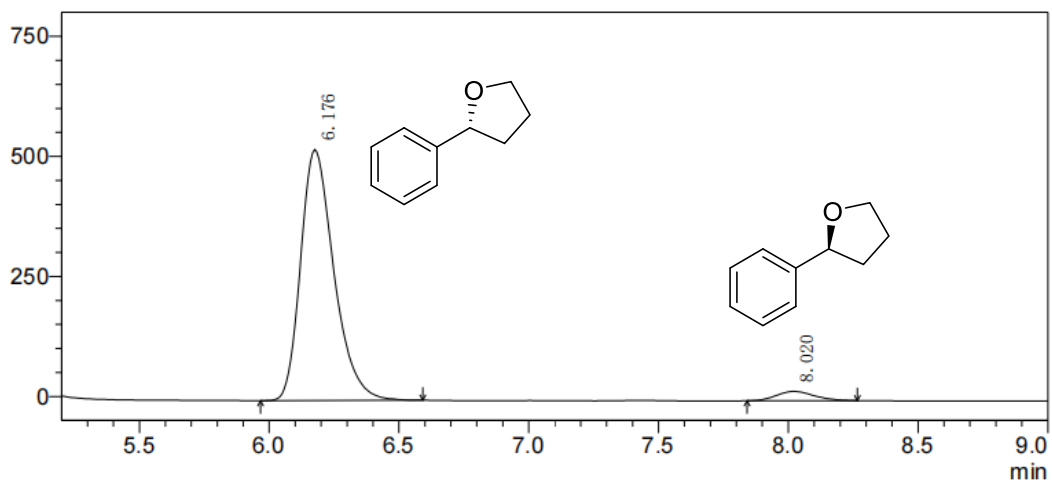

PDA 210nm

| ID# | Rt. Time | Area    | Height | Area % |
|-----|----------|---------|--------|--------|
| 1   | 6.176    | 4659847 | 522569 | 95.982 |
| 2   | 8.020    | 195046  | 19283  | 4.018  |

**Chiral HPLC analysis:** Diacel Chiralpak OD-H, *n*-hexane/*i*-PrOH = 92/8, flow rate 0.8 mL/min,  $\lambda$  = 210 nm,  $t_{(R)}$  = 6.2 min,  $t_{(S)}$  = 8.0 min.

Chemical synthesized (*rac*)-**1bb**

mV

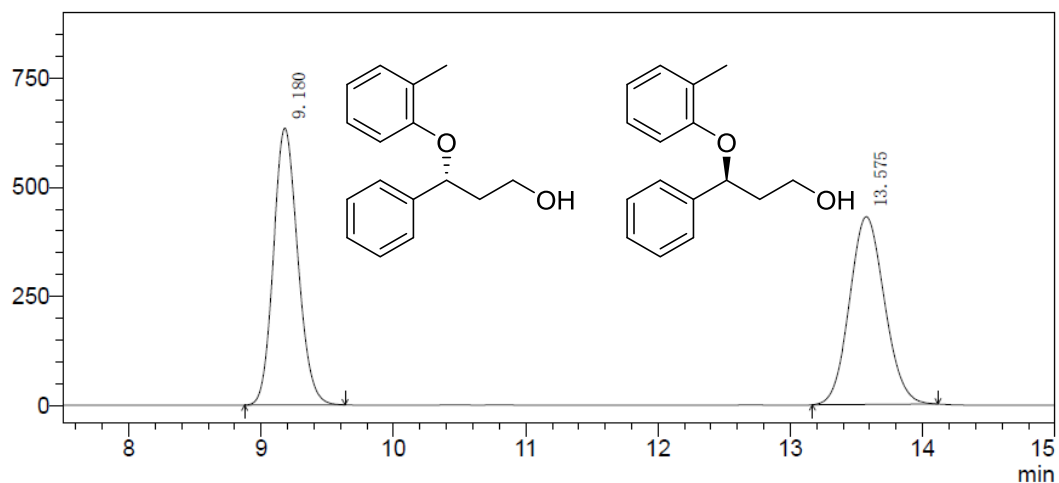

PDA 210nm

| ID# | Rt. Time | Area    | Height | Area % |
|-----|----------|---------|--------|--------|
| 1   | 9.180    | 8128125 | 634385 | 50.685 |
| 2   | 13.575   | 7908465 | 430466 | 49.315 |

Enzymatic synthesized (*R*)-**1bb**

mV

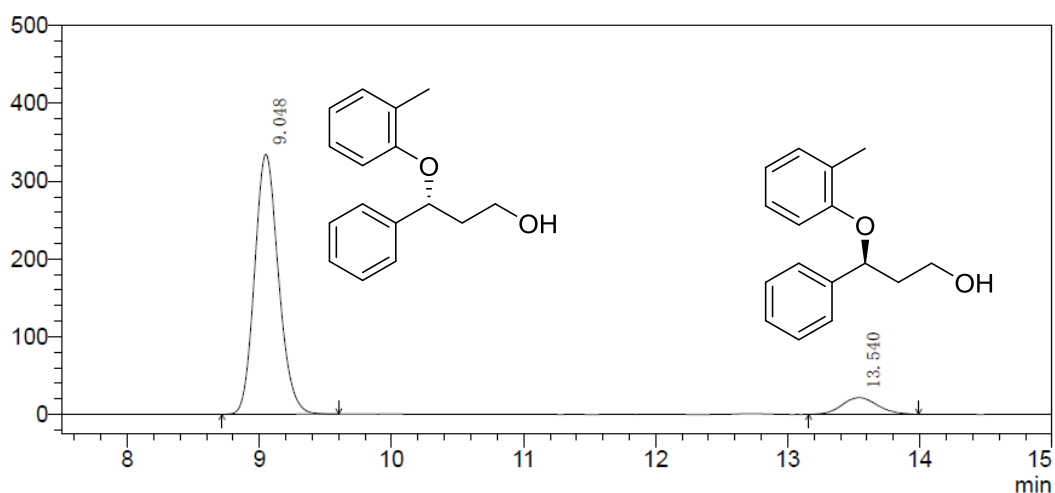

PDA 210nm

| ID# | Rt. Time | Area    | Height | Area % |
|-----|----------|---------|--------|--------|
| 1   | 9.048    | 4224257 | 334366 | 91.236 |
| 2   | 13.540   | 405753  | 21497  | 8.764  |

**Chiral HPLC analysis:** Diacel Chiralpak AD-H, *n*-hexane/*i*-PrOH = 95/5, flow rate 1.0 mL/min,  $\lambda$  = 210 nm,  $t_{(R)}$  = 9.0 min,  $t_{(S)}$  = 13.5 min.

Chemical synthesized (*rac*)-**1ca**

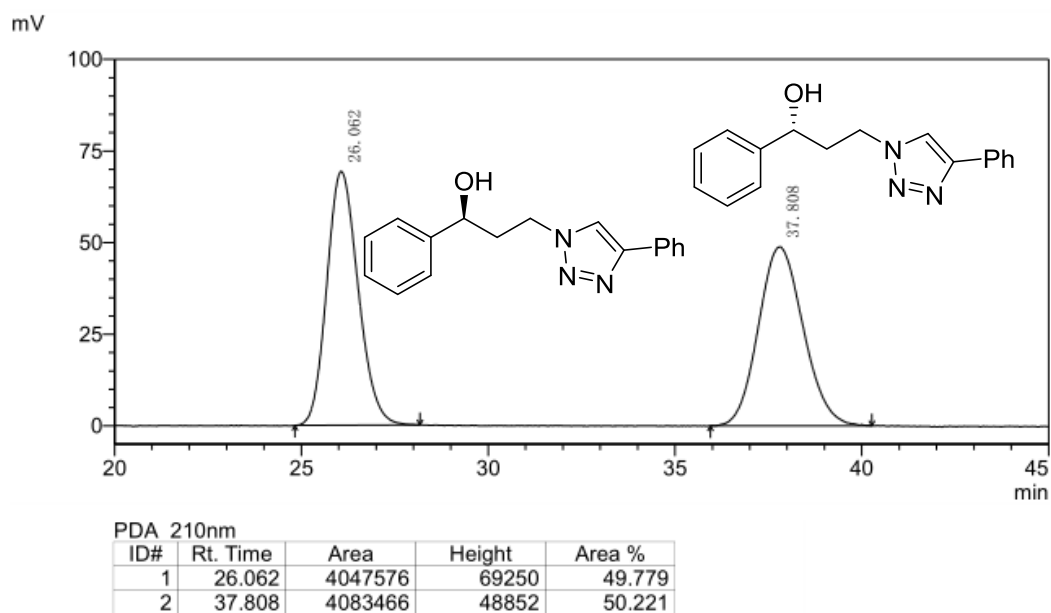

Enzymatic synthesized (*R*)-**1ca**

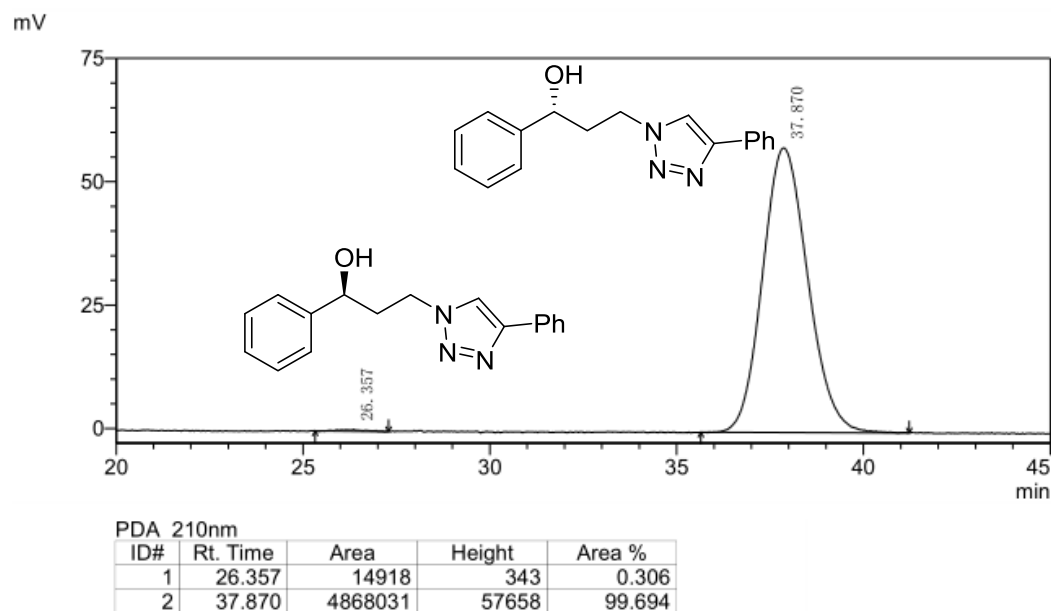

**Chiral HPLC analysis:** Diacel Chiralpak OD-H, *n*-hexane/*i*-PrOH = 80/20, flow rate 1.0 mL/min,  $\lambda$  = 210 nm,  $t_{(S)}$  = 26.4 min,  $t_{(R)}$  = 37.9 min.



Chemical synthesized (*rac*)-**1cb**

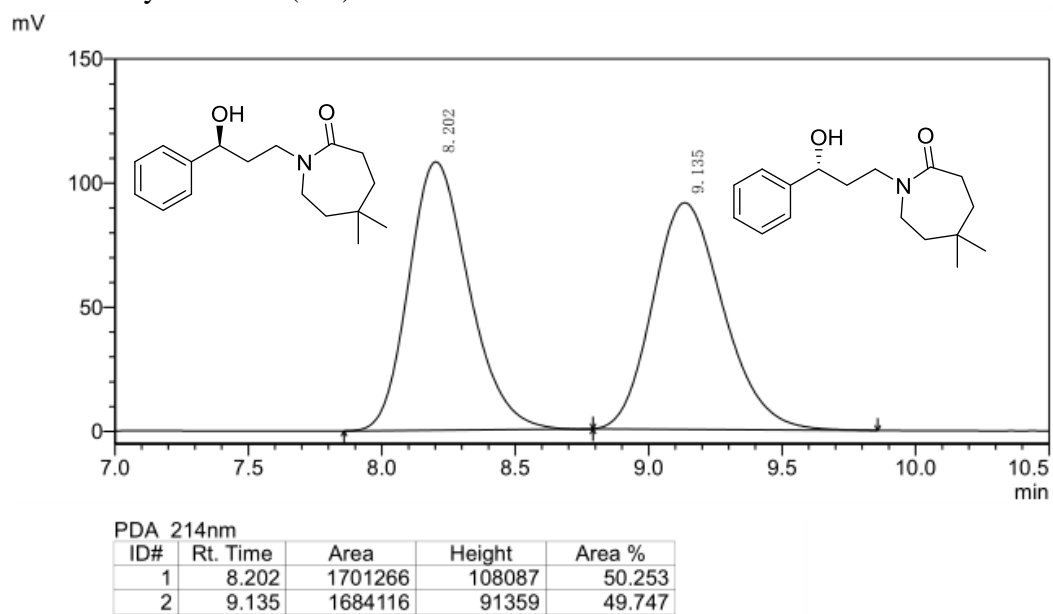

Enzymatic synthesized (*R*)-**1cb**

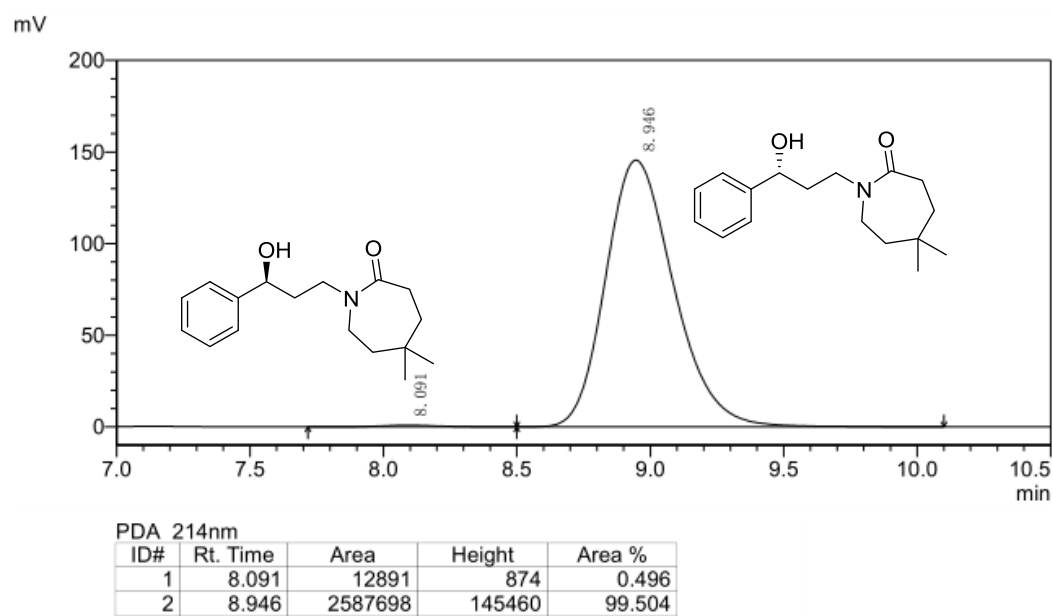

**Chiral HPLC analysis:** Diacel Chiralpak OJ-H, *n*-hexane/*i*-PrOH = 90/10, flow rate

1.0 mL/min,  $\lambda$  = 214 nm,  $t_{(S)}$  = 8.1 min,  $t_{(R)}$  = 8.9 min.

### Commercial (*rac*)-**1da**

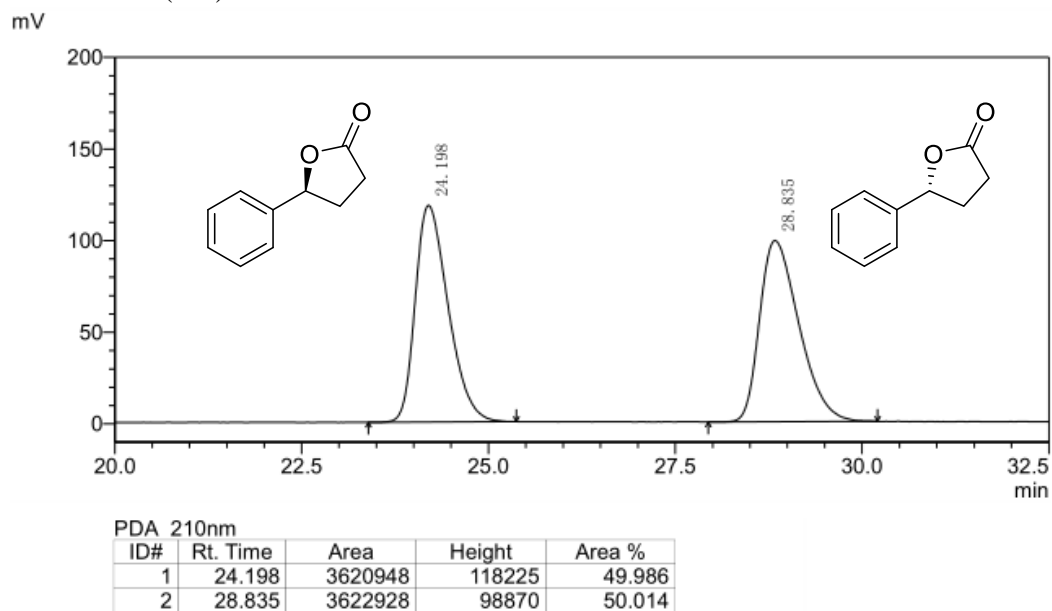

### Enzymatic synthesized (*R*)-**1da**

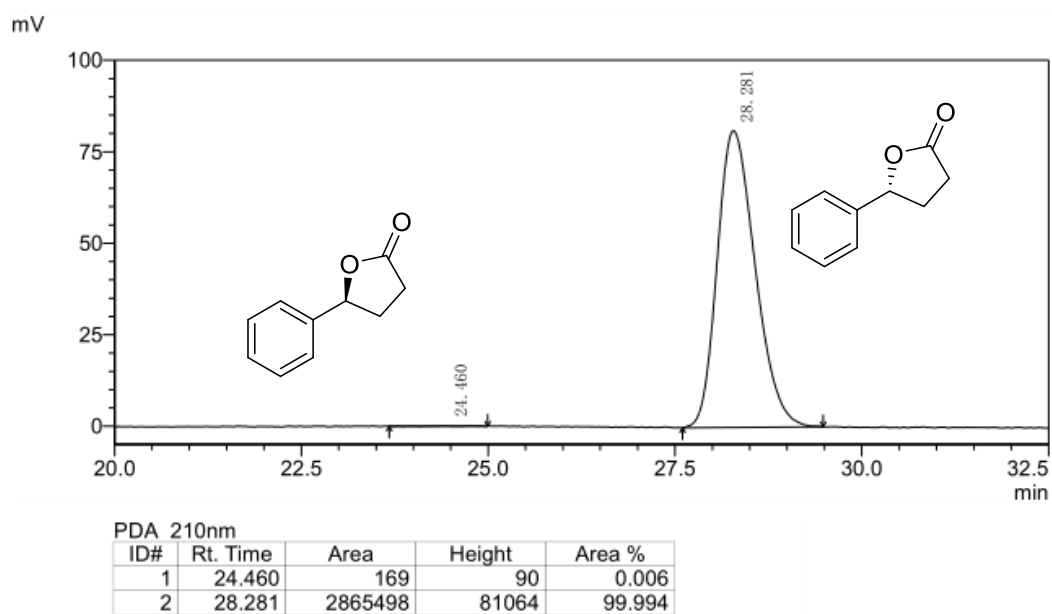

**Chiral HPLC analysis:** Diacel Chiralpak IH, *n*-hexane/*i*-PrOH = 90/10, flow rate 1.0 mL/min,  $\lambda$  = 210 nm,  $t_{(S)}$  = 24.5 min,  $t_{(R)}$  = 28.3 min.

### Chemical synthesized (*rac*)-**1db**

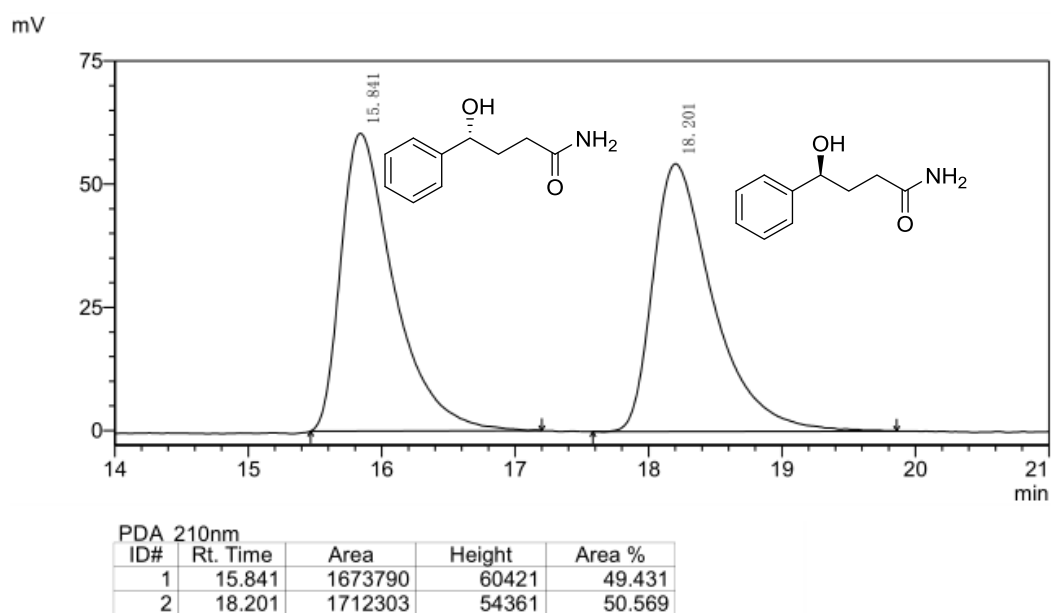

### Enzymatic synthesized (*R*)-**1db**

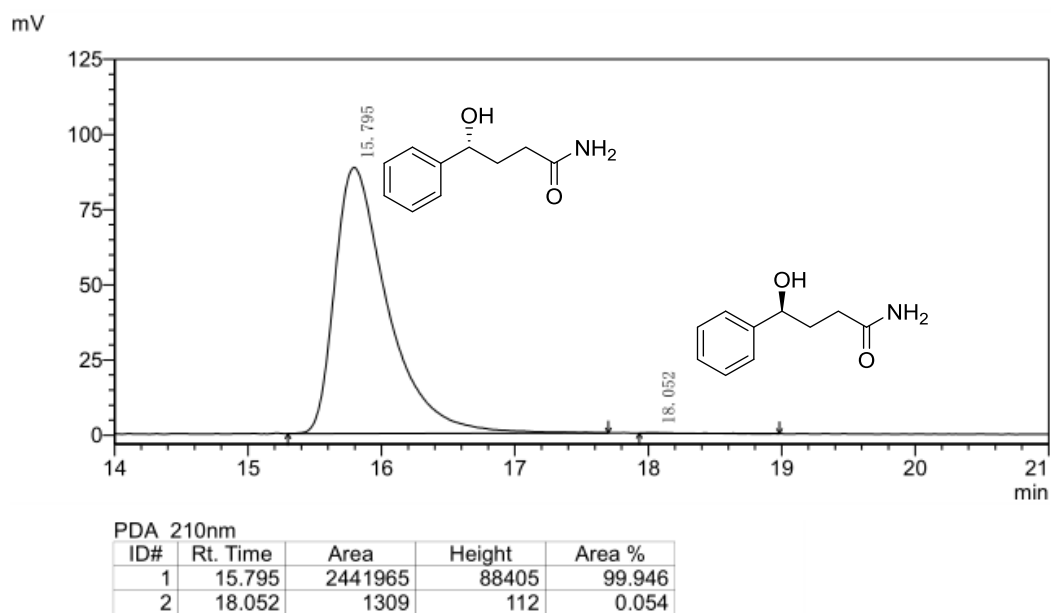

**Chiral HPLC analysis:** Diacel Chiralpak OJ-H, *n*-hexane/*i*-PrOH = 90/10, flow rate 1.0 mL/min,  $\lambda = 210$  nm,  $t_{(R)} = 15.8$  min,  $t_{(S)} = 18.1$  min.

### Commercial (*rac*)-**1ea**

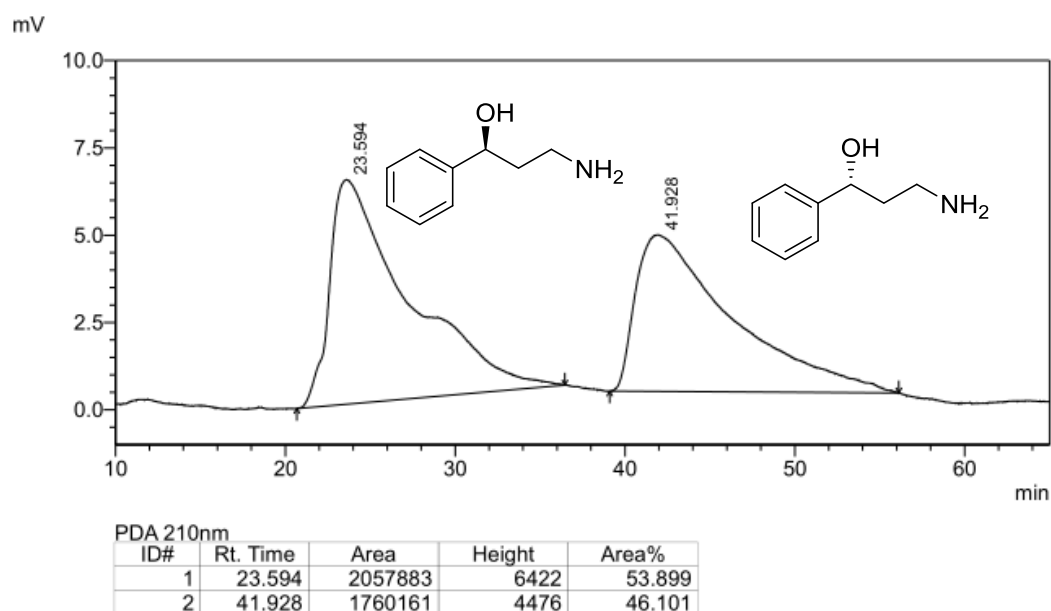

### Enzymatic synthesized (*R*)-**1ea**

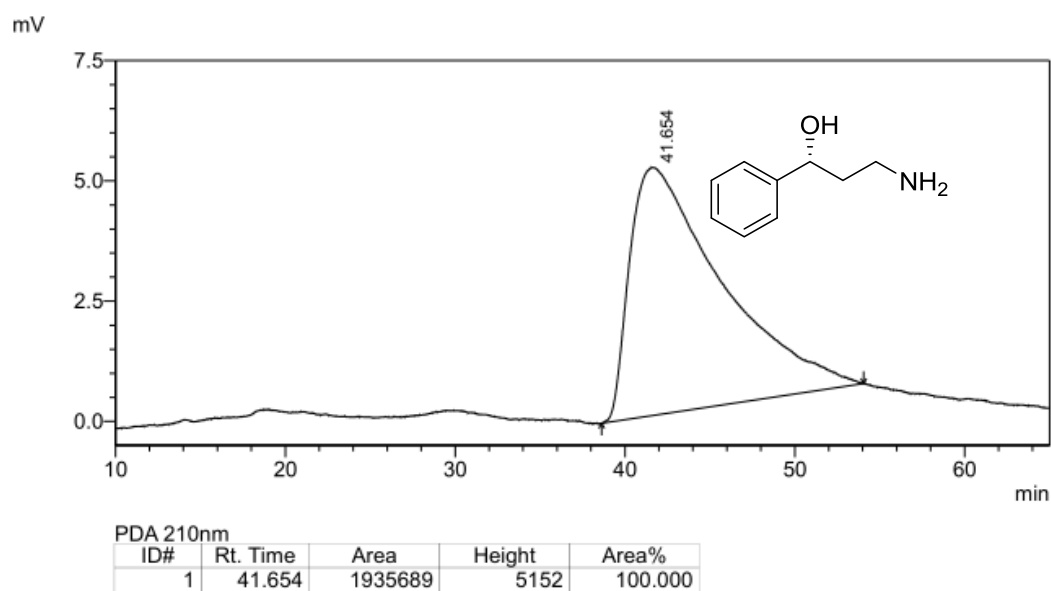

**Chiral HPLC analysis:** Diacel Chiralpak OB-H, *n*-hexane/*i*-PrOH = 92/8, flow rate 1.0 mL/min,  $\lambda = 210$  nm,  $t_{(S)} = 23.6$  min,  $t_{(R)} = 41.9$  min.

Chemical synthesized (*rac*)-**1fa**

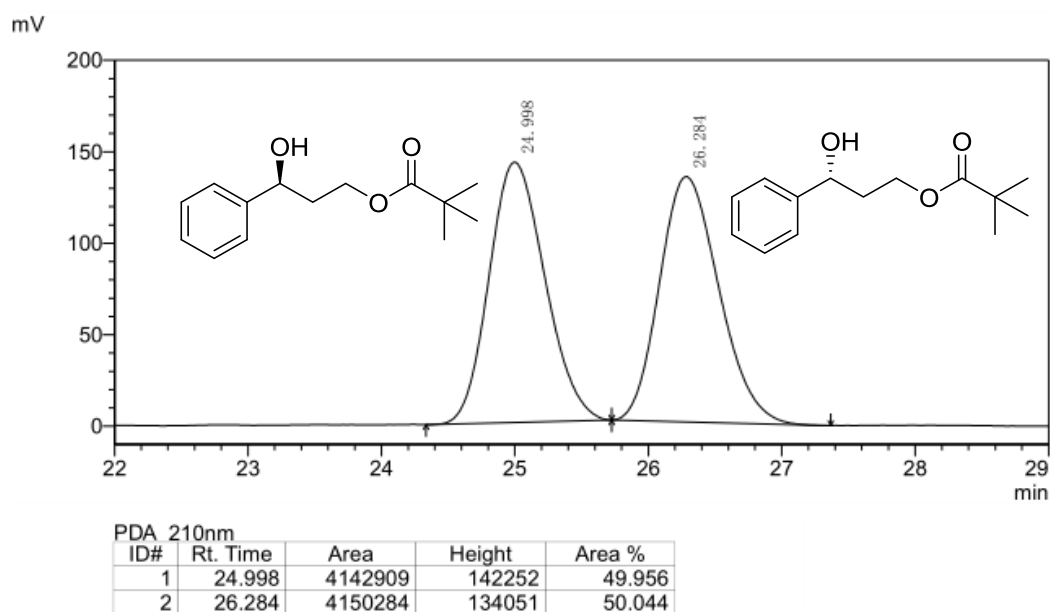

Enzymatic synthesized (*R*)-**1fa**

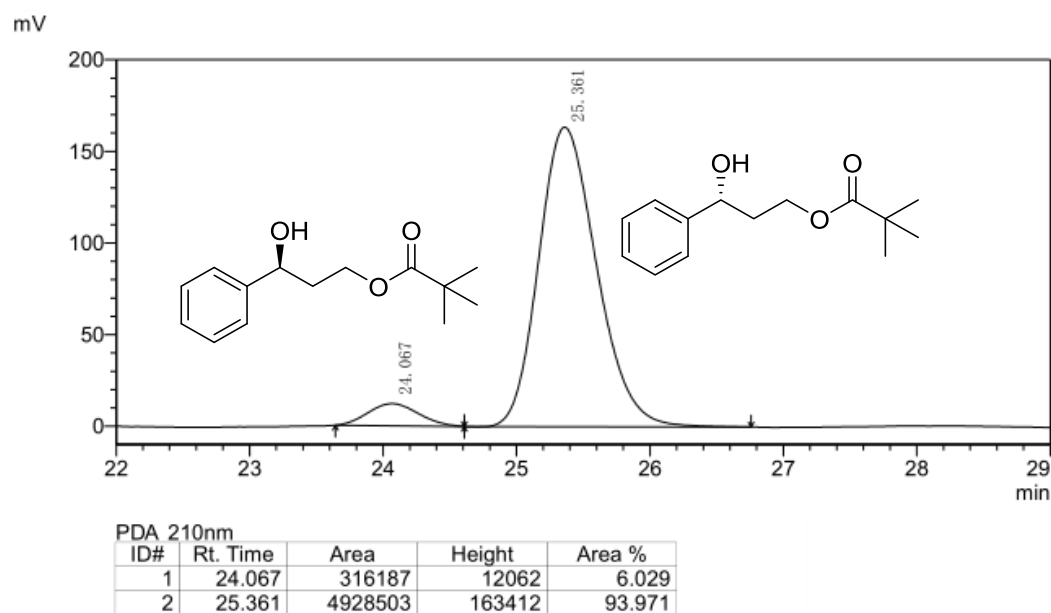

**Chiral HPLC analysis:** Diacel Chiralpak OX-3, *n*-hexane/*i*-PrOH = 97/3, flow rate 0.7 mL/min,  $\lambda$  = 210 nm,  $t_{(S)}$  = 24.1 min,  $t_{(R)}$  = 25.4 min.

## 12. References

- 1 Wan, N. *et al.* Regioselective Ring-Opening of Styrene Oxide Derivatives Using Halohydrin Dehalogenase for Synthesis of 4-Aryloxazolidinones. *Advanced Synthesis & Catalysis* **361**, 4651-4655, doi:https://doi.org/10.1002/adsc.201900786 (2019).
- 2 Wan, N. *et al.* Synthesis of Chiral 5-Aryl-2-oxazolidinones via Halohydrin Dehalogenase-Catalyzed Enantio- and Regioselective Ring-Opening of Styrene Oxides. *Advanced Synthesis & Catalysis* **362**, 1201-1207, doi:https://doi.org/10.1002/adsc.201901412 (2020).
- 3 Morris, G. M. *et al.* AutoDock4 and AutoDockTools4: Automated docking with selective receptor flexibility. *Journal of Computational Chemistry* **30**, 2785-2791, doi:https://doi.org/10.1002/jcc.21256 (2009).
- 4 DeLano, W. L. Pymol: An open-source molecular graphics tool. *CCP4 Newsl. Protein Crystallogr* **40**, 82-92 (2002).
- 5 Otwinowski, Z. & Minor, W. in *Methods in Enzymology* Vol. 276 307-326 (Academic Press, 1997).
- 6 Yang, Z., Zeng, X., Zhao, Y. & Chen, R. AlphaFold2 and its applications in the fields of biology and medicine. *Signal Transduction and Targeted Therapy* **8**, 115, doi:10.1038/s41392-023-01381-z (2023).
- 7 Adams, P. D. *et al.* PHENIX: building new software for automated crystallographic structure determination. *Acta Crystallographica Section D: Biological Crystallography* **58**, 1948-1954 (2002).
- 8 Emsley, P. & Cowtan, K. Coot: model-building tools for molecular graphics. *Acta crystallographica section D: biological crystallography* **60**, 2126-2132 (2004).
- 9 Murshudov, G. N., Vagin, A. A. & Dodson, E. J. Refinement of macromolecular structures by the maximum-likelihood method. *Acta Crystallographica Section D: Biological Crystallography* **53**, 240-255 (1997).
- 10 Laskowski, R. A., MacArthur, M. W., Moss, D. S. & Thornton, J. M. PROCHECK: a program to check the stereochemical quality of protein structures. *Journal of applied crystallography* **26**, 283-291 (1993).
- 11 DeLano, W. L. Pymol: An open-source molecular graphics tool. *CCP4 Newsletter on protein crystallography* **40**, 82-92 (2002).

- 12 Vlieg, J. E. T. v. H. *et al.* Halohydrin Dehalogenases Are Structurally and Mechanistically Related to Short-Chain Dehydrogenases/Reductases. *Journal of Bacteriology* **183**, 5058-5066, doi:doi:10.1128/jb.183.17.5058-5066.2001 (2001).
- 13 Schallmey, M. *et al.* Expanding the Halohydrin Dehalogenase Enzyme Family: Identification of Novel Enzymes by Database Mining. *Applied and Environmental Microbiology* **80**, 7303-7315, doi:doi:10.1128/AEM.01985-14 (2014).
- 14 Schallmey, A. & Schallmey, M. Recent advances on halohydrin dehalogenases—from enzyme identification to novel biocatalytic applications. *Applied Microbiology and Biotechnology* **100**, 7827-7839, doi:10.1007/s00253-016-7750-y (2016).
- 15 Wang, H.-H. *et al.* Identification and Structure Analysis of an Unusual Halohydrin Dehalogenase for Highly Chemo-, Regio- and Enantioselective Bio-Nitration of Epoxides. *Angewandte Chemie International Edition* **61**, e202205790, doi:https://doi.org/10.1002/anie.202205790 (2022).
- 16 Ma, R. *et al.* Biocatalytic Thionation of Epoxides for Enantioselective Synthesis of Thiiranes. *Angewandte Chemie International Edition* **61**, e202212589, doi:https://doi.org/10.1002/anie.202212589 (2022).
- 17 Jautze, S. & Peters, R. Enantioselective Bimetallic Catalysis of Michael Additions Forming Quaternary Stereocenters. *Angewandte Chemie International Edition* **47**, 9284-9288, doi:https://doi.org/10.1002/anie.200803539 (2008).
- 18 Xie, Q. & Dong, G. Aza-Matteson Reactions via Controlled Mono- and Double-Methylene Insertions into Nitrogen–Boron Bonds. *Journal of the American Chemical Society* **143**, 14422-14427, doi:10.1021/jacs.1c06186 (2021).
- 19 Claremon, D. A. *et al.* Preparation of 1,3-oxazinan-2-one derivatives as inhibitors of 11 $\beta$ -hydroxysteroid dehydrogenase type 1. WO2009017664 (2009).
- 20 Zhou, J.-N. *et al.* Copper(ii)-catalyzed enantioselective hydrosilylation of halo-substituted alkyl aryl and heteroaryl ketones: asymmetric synthesis of (R)-fluoxetine and (S)-duloxetine. *Organic & Biomolecular Chemistry* **12**, 1009-1017, doi:10.1039/C3OB42214C (2014).
- 21 Coppi, D. I., Salomone, A., Perna, F. M. & Capriati, V. 2-Lithiated-2-phenyloxetane: a new attractive synthon for the preparation of oxetane derivatives. *Chemical Communications* **47**, 9918-9920, doi:10.1039/C1CC13670D (2011).

- 22 Bellido, M., Riego-Mejías, C., Diaz-Moreno, A., Verdaguer, X. & Riera, A. Enantioselective Ir-Catalyzed Hydrogenation of Terminal Homoallyl Sulfones: Total Synthesis of (–)-Curcumene. *Organic Letters* **25**, 1453-1457, doi:10.1021/acs.orglett.3c00181 (2023).
- 23 Ribelin, T. P. & Aubé, J. Synthesis of enantiomerically enriched (R)-5-tert-butylazepan-2-one using a hydroxyalkyl azide mediated ring-expansion reaction. *Nature Protocols* **3**, 137-143, doi:10.1038/nprot.2007.518 (2008).
- 24 Cai, J. *et al.* Discovery of phenoxybutanoic acid derivatives as potent endothelin antagonists with antihypertensive activity. *Bioorganic & Medicinal Chemistry* **23**, 657-667, doi:https://doi.org/10.1016/j.bmc.2015.01.003 (2015).
- 25 Reichle, A. *et al.* Copper(I) Photocatalyzed Bromonitroalkylation of Olefins: Evidence for Highly Efficient Inner-Sphere Pathways. *Angewandte Chemie International Edition* **62**, e202219086, doi:https://doi.org/10.1002/anie.202219086 (2023).
